# Supplementary material for: The Influence of Calcium on the Growth, Morphology and Gene Regulation in Gemmatimonas phototrophica
Source: MDPI journal article supplement (doi:10.3390/microorganisms11010027), 2022-12-22
Supplement: s1 [file s1]

## Supplementary Material

### The influence of calcium on the growth, morphology and gene regulation of *Gemmatimonas phototrophica*

Sahana Shivaramu<sup>1</sup>, Jürgen Tomasch<sup>1</sup>, Karel Kopejtká<sup>1</sup>, Nupur<sup>1</sup>, Mohit Kumar Saini<sup>1</sup>, Syed Nadeem Hussain Bokhari<sup>2</sup>, Hendrik Küpper<sup>2,3</sup>, Michal Koblížek<sup>1\*</sup>

<sup>1</sup> Laboratory of Anoxygenic Phototrophs, Institute of Microbiology of the Czech Acad Sci, 37 981 Třeboň, Czech Republic

<sup>2</sup> Czech Academy of Sciences, Biology Centre, Institute of Plant Molecular Biology, Department of Plant Biophysics and Biochemistry, Branišovská 1760/31, 37005 České Budějovice, Czech Republic

<sup>3</sup> University of South Bohemia, Faculty of Science, Department of Experimental Plant Biology, Branišovská 1760/31a, 370 05 České Budějovice, Czech Republic

\*Author for correspondence: [koblizek@alga.cz](mailto:koblizek@alga.cz)

**This file contains:**

Supplementary Figure S1.

Supplementary Datasets S1 and S2 are included as a separated Excel files.

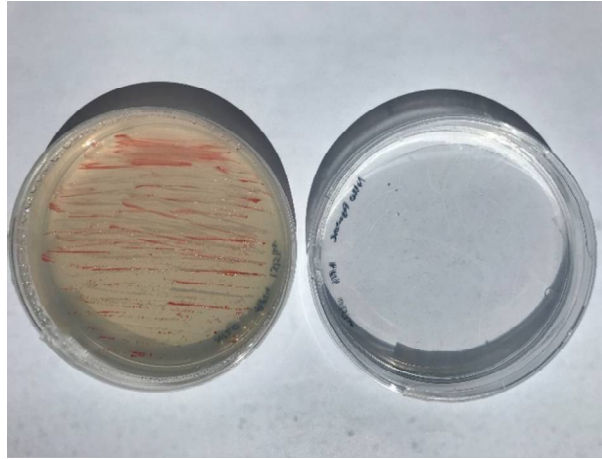

**Supplementary Figure S1.** Plates showing pure cultures of *G. phototrophica* growing on a medium solidified by agar (left) but not growing on a medium solidified by agarose (right).
