# Supplementary material for: The Influence of Calcium on the Growth, Morphology and Gene Regulation in Gemmatimonas phototrophica
Source: Microorganisms. 2022 Dec 22;11(1):27. doi: 10.3390/microorganisms11010027 (PMC9862903; doi:10.3390/microorganisms11010027)
Supplement: Supplementary file 1 [file microorganisms-11-00027-s001.zip › Supplementary_Dataset_S1.xlsx]

## Sheet: result_table_Cacl22
replicon	start	end	strand	type	locus_tag	id	product	log_cpm	lfc_x2h_20mg_ca_cl2_x2h_2mg_ca_cl2	lfc_x2h_20mg_mg_cl2_x2h_2mg_ca_cl2	lfc_x8h_20mg_ca_cl2_x8h_2mg_ca_cl2	lfc_x8h_20mg_mg_cl2_x8h_2mg_ca_cl2	lfc_x24h_20mg_ca_cl2_x24h_2mg_ca_cl2	lfc_x24h_20mg_mg_cl2_x24h_2mg_ca_cl2	fdr_x2h_20mg_ca_cl2_x2h_2mg_ca_cl2	fdr_x2h_20mg_mg_cl2_x2h_2mg_ca_cl2	fdr_x8h_20mg_ca_cl2_x8h_2mg_ca_cl2	fdr_x8h_20mg_mg_cl2_x8h_2mg_ca_cl2	fdr_x24h_20mg_ca_cl2_x24h_2mg_ca_cl2	fdr_x24h_20mg_mg_cl2_x24h_2mg_ca_cl2
NZ_CP011454.1	2933064	2933666	+	CDS	GEMMAAP_RS12435	WP_053334069.1	sigma-70 family RNA polymerase sigma factor	5.79102	-0.22176	-0.302356	-3.79077	-3.78242	-0.234798	0.0645577	0.906005	0.90833	0.0377289	0.99968	0.862613	0.992374
NZ_CP011454.1	1035504	1036019	-	CDS	GEMMAAP_RS04315	WP_053334270.1	phosphatase PAP2 family protein	-0.231463	-0.140854	-5.15909	-3.7304	-0.392419	0.300227	0.992444	0.94371	0.2072	0.198815	0.99968	0.732755	0.479478
NZ_CP011454.1	3290376	3291302	-	CDS	GEMMAAP_RS13940	WP_026848700.1	hypothetical protein	4.21364	-1.68652	0.706676	-2.59111	0.0169775	-1.49206	-0.96709	0.014485	0.349015	0.00227663	0.99968	0.0147165	0.352894
NZ_CP011454.1	3570602	3572722	-	CDS	GEMMAAP_RS15115	WP_026848529.1	TonB-dependent siderophore receptor	7.04564	-2.51486	0.125142	-2.25918	-0.0758761	-1.07881	-0.821974	0.00347123	0.932631	0.024846	0.99968	0.107069	0.510624
NZ_CP011454.1	1025950	1026744	+	CDS	GEMMAAP_RS04270	WP_026850104.1	DUF3108 domain-containing protein	7.76558	-2.39939	-1.4898	-1.90824	-0.549591	-2.03783	-0.770909	0.0264697	0.19736	0.28471	0.99968	0.0278541	0.659863
NZ_CP011454.1	4067436	4068023	-	CDS	GEMMAAP_RS17145	WP_026848234.1	OmpH family outer membrane protein	4.20153	-2.26	-2.16134	-1.78426	-0.584868	-2.61084	-0.201139	0.0549705	0.168298	0.411787	0.99968	0.0104615	0.935404
NZ_CP011454.1	3633018	3634193	-	CDS	GEMMAAP_RS15350	WP_026848495.1	PepSY domain-containing protein	5.16396	-2.81557	-0.0481542	-1.7781	-0.0799837	-0.951569	-0.717107	0.0030624	0.976733	0.178194	0.99968	0.195794	0.634728
NZ_CP011454.1	3651323	3652048	+	CDS	GEMMAAP_RS15440	WP_053333658.1	helix-turn-helix domain-containing protein	7.56012	-0.186052	0.241175	-1.60649	-0.204919	-0.216253	-0.70577	0.676495	0.626472	0.000660548	0.99968	0.551165	0.215632
NZ_CP011454.1	3658001	3658450	+	CDS	GEMMAAP_RS15475	WP_158514889.1	SUF system NifU family Fe-S cluster assembly protein	5.58986	0.0375394	0.174369	-1.60406	-0.14796	-1.2838	-1.43244	0.951778	0.767724	0.000689893	0.99968	0.00135435	0.0167414
NZ_CP011454.1	4046425	4048983	-	CDS	GEMMAAP_RS17065	WP_026848245.1	carbohydrate binding family 9 domain-containing protein	8.38881	-2.66376	-1.40598	-1.57674	-1.13133	-2.21845	-1.39163	0.00574018	0.138941	0.293248	0.99968	0.00640779	0.275558
NZ_CP011454.1	1026922	1027539	+	CDS	GEMMAAP_RS04275	WP_026850103.1	YceI family protein	8.52901	-3.63094	-2.29686	-1.51514	-0.870955	-2.63758	-0.898779	0.0244904	0.157869	0.631855	0.99968	0.0469639	0.724273
NZ_CP011454.1	3656785	3658008	+	CDS	GEMMAAP_RS15470	WP_026848481.1	cysteine desulfurase	6.95875	-0.175713	0.0867106	-1.452	-0.124397	-1.13323	-1.40414	0.732358	0.919334	0.00786433	0.99968	0.00617185	0.0240378
NZ_CP011454.1	2740539	2741615	+	CDS	GEMMAAP_RS11670	WP_158514833.1	DUF4097 family beta strand repeat-containing protein	7.71247	-1.25907	-0.910635	-1.33236	-1.1209	-0.381347	-0.639842	0.107989	0.317946	0.345993	0.99968	0.590023	0.625908
NZ_CP011454.1	3366781	3367701	+	CDS	GEMMAAP_RS14280	WP_145979154.1	DUF4097 family beta strand repeat-containing protein	7.20667	-2.21179	-1.10582	-1.32886	-0.894963	-2.38269	-1.53307	0.00647097	0.191844	0.302741	0.99968	0.00126815	0.143193
NZ_CP011454.1	3654399	3655709	+	CDS	GEMMAAP_RS15455	WP_026848483.1	Fe-S cluster assembly protein SufD	8.17591	0.0533863	0.140876	-1.2961	0.0667511	-0.891924	-1.42869	0.944751	0.862239	0.0447322	0.99968	0.0396588	0.0355588
NZ_CP011454.1	3631780	3632748	+	CDS	GEMMAAP_RS15345	WP_026848496.1	protochlorophyllide reductase	5.46175	-0.288426	0.0382052	-1.2805	0.27722	-0.676637	-0.177957	0.227158	0.94144	2.87626e-05	0.99968	0.00149211	0.659705
NZ_CP011454.1	3655850	3656302	+	CDS	GEMMAAP_RS15460	WP_026848482.1	SUF system NifU family Fe-S cluster assembly protein	7.8607	-0.504126	0.146686	-1.27654	-0.0701918	-0.560164	-1.13427	0.368492	0.874219	0.0935268	0.99968	0.264115	0.179617
NZ_CP011454.1	3656299	3656676	+	CDS	GEMMAAP_RS15465	WP_053333657.1	non-heme iron oxygenase ferredoxin subunit	7.77887	-0.573869	0.17853	-1.27597	-0.0707825	-0.612182	-1.16497	0.298609	0.835494	0.0935268	0.99968	0.226697	0.17782
NZ_CP011454.1	4350871	4353987	-	CDS	GEMMAAP_RS18340	WP_082821476.1	efflux RND transporter permease subunit	8.08402	-2.45093	-1.96434	-1.26348	-2.07994	-2.35493	-2.13116	0.216665	0.371956	0.807152	0.99968	0.180779	0.508183
NZ_CP011454.1	3652045	3653478	+	CDS	GEMMAAP_RS15445	WP_026848485.1	Fe-S cluster assembly protein SufB	8.22658	-0.215677	0.113547	-1.24969	0.000902377	-0.892754	-1.22633	0.657323	0.873385	0.018163	0.99968	0.0184879	0.0348783
NZ_CP011454.1	4066763	4067167	-	CDS	GEMMAAP_RS20675	WP_158514912.1	MGMT family protein	2.74971	-1.62975	-0.934329	-1.22477	-0.494122	-1.69441	0.0428333	0.122688	0.5452	0.563248	0.99968	0.02647	0.990898
NZ_CP011454.1	1588776	1590233	-	CDS	GEMMAAP_RS06610	WP_043581338.1	chlorophyllide a reductase subunit Z	7.50998	-0.00536954	0.231902	-1.18931	0.0258777	0.125694	-0.324988	0.992211	0.373388	1.71317e-05	0.99968	0.551895	0.34434
NZ_CP011454.1	3365945	3366772	+	CDS	GEMMAAP_RS14275	WP_026848651.1	hypothetical protein	7.27318	-2.37707	-1.04227	-1.16424	-0.74511	-2.53526	-1.36367	0.0054846	0.239307	0.427788	0.99968	0.00108822	0.216891
NZ_CP011454.1	4298991	4299419	+	CDS	GEMMAAP_RS18115	WP_026848090.1	hypothetical protein	6.7515	-2.74856	-1.04413	-1.15378	-0.829186	-2.7909	-1.32539	0.0122627	0.397606	0.600148	0.99968	0.00285283	0.346075
NZ_CP011454.1	3653653	3654402	+	CDS	GEMMAAP_RS15450	WP_026848484.1	Fe-S cluster assembly ATPase SufC	6.92226	-0.182051	-0.168526	-1.14933	0.0439477	-1.13645	-1.39981	0.760785	0.832153	0.110425	0.99968	0.0129139	0.0485367
NZ_CP011454.1	1590233	1591870	-	CDS	GEMMAAP_RS06615	WP_202969201.1	chlorophyllide a reductase subunit Y	7.5136	0.158393	0.418076	-1.1487	0.169215	0.048935	-0.280222	0.543703	0.111609	4.73111e-05	0.99968	0.849375	0.470159
NZ_CP011454.1	1371232	1371783	-	CDS	GEMMAAP_RS05685	WP_026849879.1	hypothetical protein	5.78661	-3.63618	-2.22816	-1.10715	-0.238126	-3.85909	-1.49981	0.00138611	0.0686676	0.612221	0.99968	0.000133677	0.216891
NZ_CP011454.1	2487978	2489102	-	CDS	GEMMAAP_RS10615	WP_026849787.1	PAS domain S-box protein	6.97164	-3.75074	-2.10987	-1.07584	-0.483606	-3.7801	-1.27807	0.00186892	0.0785254	0.615802	0.99968	0.000463372	0.376369
NZ_CP011454.1	3367698	3368537	+	CDS	GEMMAAP_RS14285	WP_053333722.1	DUF4097 family beta strand repeat-containing protein	7.48723	-2.0929	-1.1414	-1.07508	-0.688656	-2.13398	-1.59619	0.00272204	0.103897	0.318973	0.99968	0.00071454	0.0610364
NZ_CP011454.1	1592886	1593839	-	CDS	GEMMAAP_RS06625	WP_026850333.1	chlorophyll synthesis pathway protein BchC	6.84088	-0.35014	-0.150726	-1.07057	0.0655096	-0.349087	-0.306963	0.0896177	0.57398	2.87626e-05	0.99968	0.0513371	0.322575
NZ_CP011454.1	3470339	3471520	-	CDS	GEMMAAP_RS14685	WP_026848589.1	hypothetical protein	3.33796	-2.50334	-2.25316	-1.06826	-0.734866	-2.12358	-0.539508	0.00251645	0.0388983	0.477177	0.99968	0.00167606	0.640121
NZ_CP011454.1	3978985	3979638	-	CDS	GEMMAAP_RS16790	WP_026848286.1	hypothetical protein	0.724684	-1.14234	-0.513375	-1.01977	-1.54713	-0.304129	-0.316285	0.10767	0.651606	0.397673	0.99968	0.576802	0.792164
NZ_CP011454.1	2490687	2491451	+	CDS	GEMMAAP_RS10630	WP_026849786.1	SDR family oxidoreductase	5.70751	-2.49291	-1.58386	-1.00291	-0.671229	-2.86028	-1.08043	0.00140526	0.0720146	0.438559	0.99968	5.53936e-05	0.216891
NZ_CP011454.1	4068020	4068415	-	CDS	GEMMAAP_RS17150	WP_026848233.1	hypothetical protein	4.34751	-3.10481	-2.97984	-0.99526	-0.694885	-2.52273	-0.259387	0.00176743	0.0209114	0.59311	0.99968	0.00234382	0.872244
NZ_CP011454.1	988019	989842	-	CDS	GEMMAAP_RS04120	WP_158514726.1	hypothetical protein	9.63975	-2.09749	-1.55574	-0.992987	-0.757793	-1.61654	-1.14256	0.00367941	0.0383164	0.390177	0.99968	0.00746973	0.226854
NZ_CP011454.1	2466400	2468364	+	CDS	GEMMAAP_RS10520	WP_026849800.1	glucosamine-6-phosphate deaminase	9.21669	-0.322447	-0.140623	-0.984915	-0.195764	-0.532052	0.0202424	0.309095	0.74984	0.00786433	0.99968	0.0512486	0.98831
NZ_CP011454.1	2466013	2466342	+	CDS	GEMMAAP_RS10515	WP_026849801.1	iron-sulfur cluster assembly accessory protein	9.67656	-0.62677	-0.382775	-0.979121	-0.27715	-0.485643	-0.2947	0.00669285	0.114454	0.000179102	0.99968	0.0151378	0.389357
NZ_CP011454.1	987348	987995	-	CDS	GEMMAAP_RS04115	WP_026850129.1	hypothetical protein	7.76686	-1.30254	-0.746709	-0.962277	-0.652565	-0.986413	-1.15267	0.0297882	0.256389	0.351129	0.99968	0.056432	0.177756
NZ_CP011454.1	3365371	3365934	+	CDS	GEMMAAP_RS14270	WP_202969142.1	RNA polymerase sigma factor	7.20061	-2.52829	-0.976847	-0.949129	-0.405491	-2.42944	-0.997054	0.00528801	0.299546	0.586747	0.99968	0.00191513	0.402999
NZ_CP011454.1	951504	951788	-	CDS	GEMMAAP_RS03950	WP_043581088.1	ferrous iron transport protein A	7.73086	-1.39786	-0.458195	-0.934956	0.0883956	0.234209	-0.258737	0.000734501	0.263822	0.0571539	0.99968	0.49342	0.691648
NZ_CP011454.1	3737354	3739960	-	CDS	GEMMAAP_RS15815	WP_043579393.1	hypothetical protein	7.72676	-0.970694	-1.08187	-0.921529	-1.28568	0.26227	-0.230101	0.153226	0.155014	0.500484	0.99968	0.689532	0.868546
NZ_CP011454.1	1591894	1592889	-	CDS	GEMMAAP_RS06620	WP_043581339.1	chlorophyllide a reductase iron protein subunit X	6.74764	0.0387804	0.164993	-0.916531	0.172416	-0.336216	-0.481609	0.920566	0.632362	0.00320349	0.99968	0.136963	0.195649
NZ_CP011454.1	3362113	3364569	+	CDS	GEMMAAP_RS14260	WP_026848653.1	DEAD/DEAH box helicase	1.87929	-0.0302649	-0.628265	-0.865757	-0.415824	-0.512526	0.040188	0.974913	0.478166	0.400662	0.99968	0.194984	0.980408
NZ_CP011454.1	949260	951440	-	CDS	GEMMAAP_RS03945	WP_053334289.1	ferrous iron transport protein B	7.94244	-1.25079	-0.0232419	-0.861962	0.0283319	0.368826	-0.333422	4.95966e-05	0.963105	0.00276492	0.99968	0.0858075	0.374705
NZ_CP011454.1	3816366	3817007	+	CDS	GEMMAAP_RS16130	WP_053333629.1	gluconate 2-dehydrogenase subunit 3 family protein	4.48675	0.0896743	0.210491	-0.852245	-0.308291	0.488983	-0.0313851	0.785443	0.580155	0.00718167	0.99968	0.0149986	0.963271
NZ_CP011454.1	4044001	4046391	-	CDS	GEMMAAP_RS20105	WP_082821435.1	FG-GAP-like repeat-containing protein	6.78504	-1.31242	-0.806621	-0.845185	-0.575214	-0.956841	-0.814728	0.00514836	0.116233	0.252502	0.99968	0.0131393	0.192817
NZ_CP011454.1	4353984	4355135	-	CDS	GEMMAAP_RS18345	WP_158514923.1	efflux RND transporter periplasmic adaptor subunit	6.55373	-2.22806	-1.73913	-0.839116	-1.80597	-2.51338	-1.98086	0.23644	0.443692	0.895869	0.99968	0.133691	0.520855
NZ_CP011454.1	323946	324812	-	CDS	GEMMAAP_RS01440	WP_026849138.1	alpha/beta fold hydrolase	7.36573	-0.153623	-0.0495544	-0.817331	0.284385	-0.0164402	-0.703054	0.8075	0.96378	0.324451	0.99968	0.974801	0.331349
NZ_CP011454.1	4568265	4569194	-	CDS	GEMMAAP_RS19235	WP_075071579.1	universal stress protein	9.72368	-2.56841	-1.76199	-0.812097	-0.702723	-2.47862	-1.05542	0.00583855	0.0625172	0.646602	0.99968	0.00279971	0.411031
NZ_CP011454.1	4502778	4502894	+	CDS	GEMMAAP_RS20410	WP_145979248.1	ribbon-helix-helix protein%2C CopG family	-1.12302	0.292257	2.76763	-0.797011	0.0592259	-1.33229	0.383484	0.945424	0.289332	0.900652	0.99968	0.399084	0.911236
NZ_CP011454.1	3974444	3974836	-	CDS	GEMMAAP_RS16775	WP_053333591.1	DUF4440 domain-containing protein	5.0603	-0.819721	-0.49268	-0.794157	-0.26389	-0.476894	-0.0986337	0.0112585	0.210568	0.0641284	0.99968	0.0718956	0.877019
NZ_CP011454.1	1016382	1019465	+	CDS	GEMMAAP_RS04235	WP_043581084.1	efflux RND transporter permease subunit	1.9273	-0.6562	-1.19245	-0.786742	-0.404027	0.124361	-0.0190934	0.168379	0.0948999	0.399252	0.99968	0.787459	0.994981
NZ_CP011454.1	474057	474614	+	CDS	GEMMAAP_RS02060	WP_053333956.1	YeeE/YedE family protein	2.23299	-0.279207	-0.476505	-0.78238	-0.280141	0.483646	-0.327243	0.631588	0.550154	0.418432	0.99968	0.149217	0.66224
NZ_CP011454.1	3504299	3504448	-	CDS	GEMMAAP_RS20630	WP_158514879.1	hypothetical protein	6.09392	-2.51012	-1.63856	-0.778035	-0.655776	-2.41962	-1.30533	0.00253421	0.0686676	0.630711	0.99968	0.000829573	0.196718
NZ_CP011454.1	2763350	2764681	-	CDS	GEMMAAP_RS11760	WP_145979110.1	hypothetical protein	6.42298	0.0105107	0.0204947	-0.777668	0.147395	0.403282	-0.18952	0.984719	0.97176	0.0158952	0.99968	0.0627217	0.666269
NZ_CP011454.1	660223	660420	+	CDS	GEMMAAP_RS02860	WP_043580556.1	hypothetical protein	3.21707	-0.260274	0.207327	-0.765157	-0.444854	0.60059	0.396254	0.469851	0.69828	0.0852771	0.99968	0.0336566	0.477057
NZ_CP011454.1	3341019	3341522	+	CDS	GEMMAAP_RS14175	WP_043579468.1	hypothetical protein	8.91346	-0.780423	-0.120473	-0.760955	-0.589413	0.467098	0.0265906	0.430279	0.951335	0.752154	0.99968	0.597589	0.995458
NZ_CP011454.1	4564998	4566302	+	CDS	GEMMAAP_RS19220	WP_026851020.1	DUF4010 domain-containing protein	6.46234	-2.01227	-1.64993	-0.731169	-0.396819	-2.51692	-1.076	0.000231301	0.00796972	0.36036	0.99968	1.53938e-06	0.0523142
NZ_CP011454.1	4052800	4053363	+	CDS	GEMMAAP_RS17090	WP_026848242.1	hypothetical protein	3.489	0.00403325	-0.0686944	-0.718868	-0.723169	-0.241944	0.156721	0.99758	0.959241	0.504594	0.99968	0.567468	0.868546
NZ_CP011454.1	4332614	4332871	+	CDS	GEMMAAP_RS18260	WP_043581757.1	GlsB/YeaQ/YmgE family stress response membrane protein	2.89424	-0.477691	-0.321118	-0.717089	-0.671148	-0.41989	-0.19771	0.26429	0.623617	0.315767	0.99968	0.22329	0.796793
NZ_CP011454.1	1824799	1825911	+	CDS	GEMMAAP_RS07585	WP_158514769.1	HmuY family protein	7.23035	-1.81556	-1.07177	-0.704268	-0.123642	-1.37933	-0.766655	2.23857e-05	0.0095383	0.14153	0.99968	4.78192e-05	0.0722199
NZ_CP011454.1	2748535	2749524	+	CDS	GEMMAAP_RS11710	WP_026849629.1	peptidyl-alpha-hydroxyglycine alpha-amidating lyase family protein	4.45686	-0.273694	0.000777102	-0.700344	-0.23723	0.216005	-0.356586	0.275593	0.998623	0.0334653	0.99968	0.295306	0.334618
NZ_CP011454.1	709406	709885	+	CDS	GEMMAAP_RS20470	WP_158514706.1	hypothetical protein	8.57845	0.458576	0.500374	-0.696399	-0.61069	-0.00880197	0.208065	0.361572	0.373908	0.465025	0.99968	0.986147	0.817825
NZ_CP011454.1	4282707	4283492	-	CDS	GEMMAAP_RS18065	WP_145979227.1	hypothetical protein	2.32207	-0.534457	-1.24771	-0.690397	-0.5036	-0.329511	-0.2139	0.417374	0.203603	0.585514	0.99968	0.435777	0.816999
NZ_CP011454.1	378561	379259	+	CDS	GEMMAAP_RS01665	WP_158514687.1	FecR domain-containing protein	7.1874	-0.853686	0.241355	-0.690123	0.685558	-0.193927	0.537428	0.00019536	0.26112	0.00245506	0.0707832	0.250908	0.0337562
NZ_CP011454.1	3829639	3829842	+	CDS	GEMMAAP_RS16180	WP_026848376.1	hypothetical protein	1.2262	0.822795	0.541238	-0.685761	-0.200928	0.54229	-0.402519	0.155935	0.554851	0.558547	0.99968	0.235812	0.726158
NZ_CP011454.1	4532614	4533390	-	CDS	GEMMAAP_RS19080	WP_158514936.1	molybdopterin-dependent oxidoreductase	1.31449	-0.519813	0.12109	-0.678326	-0.58463	-0.616327	0.0413413	0.444577	0.938338	0.615802	0.99968	0.165255	0.983264
NZ_CP011454.1	2741797	2743200	+	CDS	GEMMAAP_RS11675	WP_026849635.1	MATE family efflux transporter	5.9957	-0.572263	-0.39407	-0.675044	-0.314417	-0.565671	-0.591584	0.0970087	0.367762	0.25502	0.99968	0.0463515	0.207752
NZ_CP011454.1	3829918	3830085	+	CDS	GEMMAAP_RS20665	WP_158514899.1	hypothetical protein	1.11677	0.151985	0.578918	-0.672494	-0.304941	-0.64018	-0.313369	0.895353	0.528448	0.541832	0.99968	0.0862805	0.694084
NZ_CP011454.1	2935907	2937181	-	CDS	GEMMAAP_RS12455	WP_145979119.1	MATE family efflux transporter	5.76644	-0.0680903	0.044983	-0.670678	-0.0606503	0.0850343	-0.231684	0.801306	0.919334	0.0114748	0.99968	0.681218	0.51792
NZ_CP011454.1	4306513	4308567	-	CDS	GEMMAAP_RS18145	WP_075071568.1	hypothetical protein	2.57324	-0.266333	0.076254	-0.654861	-0.582044	-0.00102032	-0.0245494	0.657517	0.953916	0.514087	0.99968	0.998561	0.991543
NZ_CP011454.1	3221835	3222380	+	CDS	GEMMAAP_RS13640	WP_053333751.1	RNA polymerase sigma factor	8.22477	-0.0462534	0.343413	-0.654456	-0.388619	-0.18181	0.373103	0.923927	0.342488	0.178194	0.99968	0.534975	0.453023
NZ_CP011454.1	3836188	3836862	-	CDS	GEMMAAP_RS16220	WP_145979188.1	hypothetical protein	9.55955	-1.9368	-0.942189	-0.646438	-0.450047	-0.892895	-1.11745	0.00023286	0.0473359	0.385871	0.99968	0.018442	0.0523142
NZ_CP011454.1	325001	325411	-	CDS	GEMMAAP_RS01445	WP_026849139.1	response regulator	9.80481	-0.255146	0.338776	-0.643866	0.157682	-0.722283	-0.751132	0.652092	0.578099	0.49428	0.99968	0.0941619	0.30283
NZ_CP011454.1	4685310	4685933	-	CDS	GEMMAAP_RS19750	WP_082821530.1	G/U mismatch-specific DNA glycosylase	6.2861	-0.990419	-0.385153	-0.643767	-0.575474	-0.448354	0.122363	0.000375675	0.179736	0.05272	0.99968	0.0329503	0.78207
NZ_CP011454.1	4693631	4694182	-	CDS	GEMMAAP_RS19785	WP_026848914.1	NUDIX hydrolase	8.4381	-0.763013	-0.51111	-0.643261	-0.646348	-0.17511	-0.548628	0.0765952	0.289329	0.409029	0.99968	0.677126	0.408306
NZ_CP011454.1	2948145	2949035	-	CDS	GEMMAAP_RS12515	WP_053334066.1	L%2CD-transpeptidase	7.13213	-1.39698	-0.939496	-0.642241	-0.56424	-0.183829	-0.639385	0.00967927	0.111921	0.547505	0.99968	0.717563	0.430137
NZ_CP011454.1	645687	648671	+	CDS	GEMMAAP_RS02830	WP_158514702.1	SusC/RagA family TonB-linked outer membrane protein	6.25118	-0.769522	-0.32515	-0.638124	-0.0284253	0.167272	-0.375243	0.0494779	0.531527	0.385871	0.99968	0.626715	0.528811
NZ_CP011454.1	3471591	3472511	-	CDS	GEMMAAP_RS14690	WP_082821364.1	prohibitin family protein	3.76504	-2.71694	-2.6177	-0.624482	-0.805863	-2.25124	-0.64098	0.000316763	0.00861974	0.680291	0.99968	0.000281252	0.479324
NZ_CP011454.1	3663914	3664261	-	CDS	GEMMAAP_RS15505	WP_053333656.1	four helix bundle protein	0.716241	0.0497517	-0.0443571	-0.619718	0.0249113	0.0462212	0.0622282	0.972534	0.984769	0.741162	0.99968	0.953532	0.983452
NZ_CP011454.1	130849	131760	-	CDS	GEMMAAP_RS00565	WP_043580083.1	alpha/beta hydrolase	2.84667	-0.113519	0.0624306	-0.612411	-0.524036	-0.277202	-0.15515	0.819298	0.947896	0.381825	0.99968	0.331195	0.806781
NZ_CP011454.1	1682388	1683179	-	CDS	GEMMAAP_RS06985	WP_026850390.1	DUF3108 domain-containing protein	8.13507	-0.97358	-0.579403	-0.612218	-0.641925	0.030389	-0.440533	0.00138611	0.0669111	0.139003	0.99968	0.92252	0.296215
NZ_CP011454.1	288888	289199	+	CDS	GEMMAAP_RS01280	WP_053334026.1	NAD(P) transhydrogenase subunit alpha	3.3599	0.348286	-0.0246075	-0.610258	0.0469733	0.357922	-0.229503	0.305426	0.976021	0.322216	0.99968	0.283615	0.771957
NZ_CP011454.1	4692715	4693359	-	CDS	GEMMAAP_RS19780	WP_053333838.1	sigma-70 family RNA polymerase sigma factor	10.0466	-1.55099	-1.12941	-0.609822	-0.527542	-0.193844	-0.574904	0.000285339	0.0113891	0.322216	0.99968	0.576802	0.29065
NZ_CP011454.1	213905	214732	-	CDS	GEMMAAP_RS00930	WP_158514682.1	host specificity protein	3.4507	-0.561127	-1.35385	-0.607803	-0.678755	-0.186335	-0.0234044	0.0759855	0.0101134	0.293248	0.99968	0.441678	0.980408
NZ_CP011454.1	3214789	3215358	-	CDS	GEMMAAP_RS13600	WP_026848754.1	hypothetical protein	8.56907	-2.07667	-1.38006	-0.604906	-0.504757	-0.939097	-1.30875	0.00210252	0.0440352	0.637932	0.99968	0.0750084	0.124163
NZ_CP011454.1	1522114	1522869	-	CDS	GEMMAAP_RS06280	WP_026850284.1	hypothetical protein	7.84548	-0.295441	-0.404107	-0.591617	-0.0594067	0.0204495	-0.394071	0.208245	0.118395	0.0568538	0.99968	0.937918	0.252988
NZ_CP011454.1	4331542	4331895	-	CDS	GEMMAAP_RS18250	WP_043581798.1	TfoX/Sxy family protein	6.04108	-1.01027	-0.5626	-0.591441	-0.24631	-1.01343	-0.220082	0.00343187	0.142725	0.293248	0.99968	0.000657507	0.682588
NZ_CP011454.1	1013266	1016352	+	CDS	GEMMAAP_RS04230	WP_075071422.1	efflux RND transporter permease subunit	2.24702	-0.726809	-0.392093	-0.575015	-0.418558	-0.0123215	0.13288	0.108401	0.5653	0.57102	0.99968	0.979134	0.894376
NZ_CP011454.1	4161653	4162396	-	CDS	GEMMAAP_RS17525	WP_026848184.1	hypothetical protein	3.5008	0.0310075	0.262873	-0.566221	0.0451991	0.151359	0.273778	0.979731	0.822528	0.718813	0.99968	0.758292	0.761491
NZ_CP011454.1	2027456	2027995	-	CDS	GEMMAAP_RS20305	WP_026850606.1	hypothetical protein	2.59911	0.218871	-0.0907244	-0.565972	-0.231377	0.184739	-0.0941175	0.504906	0.925004	0.327607	0.99968	0.544678	0.928109
NZ_CP011454.1	2751858	2753666	-	CDS	GEMMAAP_RS11720	WP_053334108.1	HupE/UreJ family protein	4.81262	-0.429139	-0.562946	-0.558292	-0.115349	-0.0897308	-0.418104	0.109743	0.0972849	0.197457	0.99968	0.720563	0.275558
NZ_CP011454.1	2021989	2022438	-	CDS	GEMMAAP_RS20300	WP_145979061.1	hypothetical protein	2.27366	0.222159	0.223988	-0.554154	0.044173	0.121625	0.443627	0.679209	0.787365	0.606839	0.99968	0.808365	0.607838
NZ_CP011454.1	1021284	1022837	+	CDS	GEMMAAP_RS04255	WP_158514728.1	serine/threonine-protein kinase	8.7802	-0.779397	-0.357374	-0.549592	-0.551874	-0.725595	-0.506916	0.0425416	0.425952	0.434414	0.99968	0.0325126	0.386114
NZ_CP011454.1	3469327	3470223	-	CDS	GEMMAAP_RS14680	WP_043579448.1	ABC transporter ATP-binding protein	3.76279	-0.0499743	0.283605	-0.548566	-0.221503	-0.415453	0.0169376	0.913746	0.560924	0.293248	0.99968	0.0818549	0.98831
NZ_CP011454.1	3837120	3837710	+	CDS	GEMMAAP_RS16225	WP_026848367.1	DUF4440 domain-containing protein	4.39987	-1.53082	-0.85225	-0.543568	-0.160672	-1.13328	-0.889875	0.000508558	0.0797391	0.511858	0.99968	0.00111624	0.0746306
NZ_CP011454.1	890815	892794	+	CDS	GEMMAAP_RS03745	WP_026850188.1	Ig-like domain-containing protein	5.66975	-0.285476	0.106849	-0.542533	-0.216288	0.220082	0.218119	0.192958	0.759102	0.0762481	0.99968	0.226724	0.524958
NZ_CP011454.1	2764691	2767858	-	CDS	GEMMAAP_RS11765	WP_158514834.1	SusC/RagA family TonB-linked outer membrane protein	7.53559	0.196248	0.148201	-0.541558	0.146428	0.316355	0.054067	0.38282	0.593459	0.0568538	0.99968	0.0923016	0.913528
NZ_CP011454.1	4691899	4692447	-	CDS	GEMMAAP_RS19775	WP_026848913.1	zf-HC2 domain-containing protein	8.87992	-1.16395	-1.15955	-0.539236	-0.437412	-0.380256	-0.787675	0.0054846	0.0156604	0.486471	0.99968	0.283615	0.169356
NZ_CP011454.1	4414350	4415081	+	CDS	GEMMAAP_RS18605	WP_026850927.1	PorT family protein	8.9092	1.85378	1.24395	-0.536867	-1.04071	0.902931	0.0195315	0.0269586	0.161187	0.808932	0.99968	0.198015	0.996345
NZ_CP011454.1	1692910	1693296	+	CDS	GEMMAAP_RS07025	WP_026850395.1	hypothetical protein	5.18972	-0.310829	-0.257596	-0.531324	-0.0102367	-0.119278	0.0984955	0.264785	0.489996	0.25502	0.99968	0.626003	0.84658
NZ_CP011454.1	3817032	3817535	+	CDS	GEMMAAP_RS16135	WP_026848383.1	DinB family protein	4.68839	0.214139	0.31017	-0.527189	-0.13294	0.317896	-0.149164	0.519546	0.445081	0.320518	0.99968	0.184895	0.771957
NZ_CP011454.1	4217434	4217652	-	CDS	GEMMAAP_RS17780	WP_026848144.1	hypothetical protein	3.02701	-0.116891	-0.107034	-0.525398	-0.502938	-0.497388	0.212205	0.78768	0.88027	0.410845	0.99968	0.0694453	0.703082
NZ_CP011454.1	1859510	1860871	+	CDS	GEMMAAP_RS07695	WP_026850496.1	tRNA lysidine(34) synthetase TilS	9.12643	-0.904585	-0.590761	-0.522464	-0.413329	0.0550915	-0.0977613	0.000639463	0.0286443	0.116366	0.99968	0.828556	0.834103
NZ_CP011454.1	176390	177247	-	CDS	GEMMAAP_RS00790	WP_075071371.1	copper chaperone PCu(A)C	6.17838	-2.02078	-1.1035	-0.518537	-0.374927	-2.27668	-1.27748	0.00016097	0.0344554	0.547505	0.99968	2.128e-06	0.0157563
NZ_CP011454.1	3867448	3868158	-	CDS	GEMMAAP_RS16375	WP_145979192.1	hypothetical protein	2.72447	-0.874138	-0.913731	-0.51807	-0.397027	-0.659209	-0.151193	0.0791695	0.186458	0.650864	0.99968	0.0778507	0.865198
NZ_CP011454.1	2495893	2496279	-	CDS	GEMMAAP_RS10650	WP_158514815.1	PEP-CTERM sorting domain-containing protein	2.61895	-0.149067	-0.129692	-0.5155	-0.275599	-0.47508	-0.323404	0.734544	0.866599	0.513046	0.99968	0.117345	0.598385
NZ_CP011454.1	429681	430010	+	CDS	GEMMAAP_RS01910	WP_043580464.1	heavy metal-binding domain-containing protein	5.54917	0.0127627	-0.187098	-0.514065	-0.3691	-0.0150674	0.023291	0.981977	0.653153	0.299389	0.99968	0.957679	0.980408
NZ_CP011454.1	2749663	2751861	-	CDS	GEMMAAP_RS11715	WP_053334109.1	PQQ-binding-like beta-propeller repeat protein	5.97846	0.0375615	-0.0158082	-0.511836	-0.111269	0.322171	-0.178984	0.905077	0.973561	0.0787897	0.99968	0.0686808	0.614524
NZ_CP011454.1	1047968	1048471	+	CDS	GEMMAAP_RS04365	WP_043581077.1	L-2-amino-thiazoline-4-carboxylic acid hydrolase	4.50516	-0.0263771	-0.375682	-0.511332	-0.238661	-0.308168	-0.0494555	0.972534	0.545557	0.602981	0.99968	0.368335	0.964545
NZ_CP011454.1	1034305	1035507	-	CDS	GEMMAAP_RS04310	WP_026850098.1	glycosyltransferase	1.40411	-0.104245	0.387288	-0.507388	-1.18628	-0.405867	0.461834	0.902954	0.676475	0.672897	0.99968	0.358056	0.57107
NZ_CP011454.1	4675932	4676399	-	CDS	GEMMAAP_RS19705	WP_026848902.1	hypothetical protein	4.39025	0.232122	0.0171341	-0.507002	-0.269255	-0.0976356	0.230026	0.377123	0.976659	0.202747	0.99968	0.668056	0.562684
NZ_CP011454.1	1678737	1679117	-	CDS	GEMMAAP_RS06955	WP_026850385.1	ribosome silencing factor	8.40189	-0.979891	-0.485435	-0.506195	-0.481744	-0.751712	0.405327	0.069136	0.447375	0.676901	0.99968	0.108465	0.660323
NZ_CP011454.1	2202413	2203159	+	CDS	GEMMAAP_RS09295	WP_082821201.1	glycerophosphodiester phosphodiesterase	5.92279	-0.423889	-0.418654	-0.505448	-0.287028	-0.51592	0.0232942	0.0456636	0.100178	0.0937698	0.99968	0.00603904	0.974278
NZ_CP011454.1	356530	356790	+	CDS	GEMMAAP_RS01575	WP_026849158.1	hypothetical protein	4.79543	-0.865607	-0.469519	-0.505423	-0.690082	-0.294145	0.206287	0.00390887	0.192334	0.300345	0.99968	0.208782	0.659705
NZ_CP011454.1	3119529	3119789	+	CDS	GEMMAAP_RS13195	WP_043579515.1	CsbD family protein	3.89	-0.313335	-0.334095	-0.504177	-0.500913	0.153606	-0.51925	0.400793	0.50657	0.489617	0.99968	0.664563	0.396798
NZ_CP011454.1	2475180	2476028	-	CDS	GEMMAAP_RS10550	WP_145979094.1	hypothetical protein	8.43307	-0.835682	-0.841903	-0.49961	-0.414667	-0.332204	-0.519576	0.00967927	0.0215075	0.372004	0.99968	0.239549	0.270917
NZ_CP011454.1	3364600	3365244	+	CDS	GEMMAAP_RS14265	WP_053333723.1	HAD-IA family hydrolase	4.0408	-0.819807	-0.535509	-0.499217	-0.378022	-0.976171	-0.0308772	0.0107424	0.186321	0.410845	0.99968	0.000531437	0.975619
NZ_CP011454.1	4231537	4231938	-	CDS	GEMMAAP_RS17855	WP_026848132.1	hypothetical protein	3.87467	0.0454744	-0.133972	-0.498965	-0.533096	-0.313799	0.364419	0.916205	0.815746	0.324451	0.99968	0.164188	0.346075
NZ_CP011454.1	3487427	3487906	-	CDS	GEMMAAP_RS14750	WP_043579443.1	HNH endonuclease	6.19286	0.944227	1.12846	-0.498467	0.0639221	-0.784489	0.253278	0.000639463	0.00453313	0.20715	0.99968	0.000302472	0.472915
NZ_CP011454.1	648698	650272	+	CDS	GEMMAAP_RS02835	WP_053333989.1	RagB/SusD family nutrient uptake outer membrane protein	5.2754	0.0773629	-0.00497211	-0.498266	0.0666023	0.435145	-0.128959	0.887539	0.996159	0.52679	0.99968	0.150706	0.856856
NZ_CP011454.1	4536167	4536439	+	CDS	GEMMAAP_RS19105	WP_026851001.1	zf-HC2 domain-containing protein	2.42268	-0.100302	0.13335	-0.498204	-0.235655	-0.457016	-0.0710426	0.865453	0.882068	0.620515	0.99968	0.185902	0.946908
NZ_CP011454.1	1521538	1521996	-	CDS	GEMMAAP_RS06275	WP_145979029.1	type II secretion system GspH family protein	6.03055	-0.0701673	-0.396084	-0.49438	0.00894389	-0.117839	-0.133525	0.766525	0.0889087	0.0665583	0.99968	0.510015	0.698576
NZ_CP011454.1	1345649	1346899	+	CDS	GEMMAAP_RS05625	WP_158514748.1	alpha/beta fold hydrolase	4.80508	-1.61131	-1.21977	-0.494095	-0.548939	-2.49428	-1.29871	0.000859334	0.0381064	0.620515	0.99968	6.09626e-07	0.0142267
NZ_CP011454.1	1512944	1514206	-	CDS	GEMMAAP_RS06230	WP_026850275.1	type II secretion system F family protein	5.20888	0.110047	0.267707	-0.493587	-0.130183	0.394404	-0.136288	0.629539	0.269205	0.0660636	0.99968	0.0208269	0.706732
NZ_CP011454.1	1012078	1013250	+	CDS	GEMMAAP_RS04225	WP_075071421.1	efflux RND transporter periplasmic adaptor subunit	2.11172	-0.470211	0.00491189	-0.491449	-0.106648	0.0744954	0.337243	0.447146	0.998154	0.753063	0.99968	0.876771	0.687168
NZ_CP011454.1	4413122	4414315	+	CDS	GEMMAAP_RS18600	WP_026850926.1	hypothetical protein	8.48402	1.38631	1.55795	-0.488456	-0.800516	0.581859	0.331763	0.091576	0.0920417	0.837897	0.99968	0.40593	0.817825
NZ_CP011454.1	2768355	2768813	-	CDS	GEMMAAP_RS11770	WP_026849621.1	cytochrome c	6.85559	-0.606516	-0.80193	-0.485076	-0.312884	-0.770632	-0.477989	0.134448	0.0874355	0.576739	0.99968	0.0319714	0.46572
NZ_CP011454.1	3908808	3910010	+	CDS	GEMMAAP_RS16520	WP_202969228.1	ornithine--oxo-acid transaminase	9.15817	0.284084	0.0130766	-0.482583	0.0684284	-0.0358695	0.131116	0.18898	0.976021	0.110425	0.99968	0.875091	0.73568
NZ_CP011454.1	3222435	3223058	+	CDS	GEMMAAP_RS20065	WP_043579487.1	isoamylase early set domain-containing protein	7.58965	0.103405	0.457677	-0.482392	-0.19938	-0.297519	0.255046	0.761871	0.139518	0.311521	0.99968	0.218803	0.583512
NZ_CP011454.1	68796	69392	-	CDS	GEMMAAP_RS00295	WP_082820937.1	Uma2 family endonuclease	4.6919	-0.0764239	-0.125894	-0.481014	-0.14741	-0.11351	0.0106157	0.834808	0.787365	0.326719	0.99968	0.665178	0.994981
NZ_CP011454.1	894016	896475	+	CDS	GEMMAAP_RS03765	WP_158514722.1	hypothetical protein	6.56589	-0.119712	0.200854	-0.480744	-0.0820912	0.617666	0.0795044	0.659319	0.504424	0.205125	0.99968	0.00345719	0.871307
NZ_CP011454.1	3136072	3136941	-	CDS	GEMMAAP_RS13285	WP_202969136.1	nuclear transport factor 2 family protein	4.87821	-0.0699012	0.291182	-0.480597	-0.332276	0.124065	-0.162995	0.801625	0.290159	0.143394	0.99968	0.512552	0.655851
NZ_CP011454.1	64232	66436	+	CDS	GEMMAAP_RS00280	WP_145978921.1	hypothetical protein	7.4737	-1.08795	-0.283998	-0.480097	-0.426711	0.127148	-0.292605	0.0316456	0.673302	0.666453	0.99968	0.805617	0.749682
NZ_CP011454.1	2449585	2450055	-	CDS	GEMMAAP_RS10405	WP_026849816.1	SsrA-binding protein SmpB	7.53735	-1.19279	-1.05434	-0.479235	-0.583252	-0.805023	-0.539169	0.00227731	0.0167026	0.500484	0.99968	0.0129139	0.322575
NZ_CP011454.1	4676609	4677061	-	CDS	GEMMAAP_RS19710	WP_026848903.1	hypothetical protein	4.53111	-0.0392577	-0.199219	-0.477167	-0.156325	-0.0723604	0.298883	0.96853	0.732382	0.246354	0.99968	0.746088	0.378663
NZ_CP011454.1	1083716	1083865	+	CDS	GEMMAAP_RS20725	WP_169804577.1	DUF5989 family protein	3.21655	0.201868	-0.296936	-0.477122	-0.0430403	-0.328848	0.00308964	0.649025	0.630504	0.560857	0.99968	0.287485	0.998814
NZ_CP011454.1	3370893	3372611	+	CDS	GEMMAAP_RS20780	WP_158514871.1	hypothetical protein	3.54246	-0.395817	0.0612092	-0.47312	-0.361627	-0.00054169	0.0833905	0.346316	0.950899	0.59311	0.99968	0.998793	0.92312
NZ_CP011454.1	4172987	4173943	+	CDS	GEMMAAP_RS17590	WP_026848171.1	AraC family transcriptional regulator	4.96971	-1.25157	-0.918497	-0.470282	-0.464721	-0.201772	-0.131044	0.00578103	0.0942304	0.631855	0.99968	0.594187	0.877019
NZ_CP011454.1	3272548	3272871	-	CDS	GEMMAAP_RS13855	WP_158514865.1	hypothetical protein	1.47546	-0.415896	-0.628201	-0.467421	-0.815941	-0.165666	0.0472359	0.706156	0.719704	0.882867	0.99968	0.798323	0.986703
NZ_CP011454.1	3808050	3808589	+	CDS	GEMMAAP_RS16090	WP_026848391.1	DUF4334 domain-containing protein	3.92008	0.499459	0.315664	-0.467319	-0.0422366	-0.0593102	0.0467447	0.0463505	0.344791	0.25502	0.99968	0.830904	0.935404
NZ_CP011454.1	2039655	2040008	-	CDS	GEMMAAP_RS20525	WP_026850617.1	roadblock/LC7 domain-containing protein	4.7219	-0.288105	-0.371865	-0.46493	-0.436256	-0.644259	0.222647	0.349195	0.331852	0.403463	0.99968	0.0111562	0.655851
NZ_CP011454.1	98463	98777	+	CDS	GEMMAAP_RS00405	WP_202969170.1	HigA family addiction module antidote protein	4.27696	0.37544	0.107228	-0.464703	-0.297982	-0.625924	0.0705749	0.152366	0.88027	0.318392	0.99968	0.00384141	0.891662
NZ_CP011454.1	1704564	1704992	+	CDS	GEMMAAP_RS07075	WP_026850402.1	acyl-CoA thioesterase	3.84476	-1.25212	-1.12451	-0.464236	-0.385443	-0.26394	-0.275175	0.000703911	0.0167026	0.49428	0.99968	0.374083	0.646991
NZ_CP011454.1	1042261	1042632	+	CDS	GEMMAAP_RS04335	WP_026850095.1	hypothetical protein	5.52245	-0.124834	0.425696	-0.462592	-0.0707941	0.0940271	0.167654	0.72654	0.239979	0.410845	0.99968	0.745729	0.755303
NZ_CP011454.1	2626715	2629192	-	CDS	GEMMAAP_RS11210	WP_158514829.1	TonB-dependent receptor	5.05656	-0.708022	-0.88145	-0.462406	-0.302173	0.0406551	-0.360224	0.008734	0.0141173	0.326018	0.99968	0.883362	0.395611
NZ_CP011454.1	2513667	2514641	+	CDS	GEMMAAP_RS10715	WP_026849772.1	ABC transporter permease	5.30493	0.0621419	0.0715959	-0.461686	-0.136378	-0.609088	0.106293	0.852022	0.881534	0.299389	0.99968	0.00553789	0.817825
NZ_CP011454.1	2489619	2490359	-	CDS	GEMMAAP_RS20000	WP_053334165.1	sterol desaturase family protein	4.37236	-0.129016	-0.272328	-0.460128	-0.0920271	-0.601007	0.00257466	0.709097	0.528296	0.410211	0.99968	0.00787813	0.998662
NZ_CP011454.1	4655128	4655937	-	CDS	GEMMAAP_RS19590	WP_026848883.1	agmatinase	5.31567	-0.603147	-0.281494	-0.459303	-0.355461	-0.674751	-0.340296	0.0410081	0.484494	0.418432	0.99968	0.00738825	0.448626
NZ_CP011454.1	2067166	2068764	+	CDS	GEMMAAP_RS19980	WP_158514788.1	peptidylprolyl isomerase	7.12919	-0.842812	-0.636086	-0.456919	-0.599357	-0.356216	-0.406031	0.00539778	0.0574705	0.386346	0.99968	0.166049	0.359694
NZ_CP011454.1	1625206	1625520	-	CDS	GEMMAAP_RS06735	WP_026850350.1	DUF485 domain-containing protein	3.50431	-0.428475	-0.421472	-0.456435	-0.0803565	-0.385419	0.0452376	0.15568	0.300617	0.462435	0.99968	0.109219	0.965875
NZ_CP011454.1	3447352	3448338	-	CDS	GEMMAAP_RS14610	WP_158514878.1	hypothetical protein	9.00518	-1.19864	-0.864682	-0.456126	-0.451017	-0.0474442	-0.353405	0.00016097	0.00831815	0.300345	0.99968	0.864899	0.375644
NZ_CP011454.1	3778380	3778760	+	CDS	GEMMAAP_RS15960	WP_082821403.1	four helix bundle protein	3.8153	-0.255157	-0.291835	-0.455399	-0.391019	0.324569	-0.455027	0.461531	0.534833	0.500484	0.99968	0.258691	0.411031
NZ_CP011454.1	141271	141834	-	CDS	GEMMAAP_RS00620	WP_158514671.1	Uma2 family endonuclease	4.14797	0.236156	-0.0570564	-0.454981	-0.106431	-0.696573	0.224993	0.499996	0.94369	0.486471	0.99968	0.00558494	0.644131
NZ_CP011454.1	499942	501111	-	CDS	GEMMAAP_RS02175	WP_158514694.1	glycosyltransferase	8.36366	-0.479929	-0.466818	-0.454675	-0.455854	-0.169426	-0.539185	0.0622437	0.0993187	0.300345	0.99968	0.482913	0.137072
NZ_CP011454.1	1092171	1092671	-	CDS	GEMMAAP_RS04535	WP_026850068.1	hypothetical protein	6.88028	-0.685341	-0.795808	-0.453813	-0.473189	-0.419496	-0.491323	0.00698349	0.0118851	0.293248	0.99968	0.0509983	0.164047
NZ_CP011454.1	4292415	4293944	-	CDS	GEMMAAP_RS18090	WP_026848095.1	alpha/beta hydrolase	5.81073	-0.752299	-0.450068	-0.453728	-0.420823	-0.886831	-1.0373	0.062094	0.366906	0.615802	0.99968	0.0135692	0.0650392
NZ_CP011454.1	421382	422836	-	CDS	GEMMAAP_RS01880	WP_145978952.1	CoF synthetase	2.92698	-0.335138	-0.58748	-0.448341	-0.634034	0.206844	0.15548	0.648227	0.572106	0.794568	0.99968	0.666326	0.887637
NZ_CP011454.1	3296766	3298850	-	CDS	GEMMAAP_RS13975	WP_082821336.1	heavy metal translocating P-type ATPase	2.23714	0.255711	0.351606	-0.445286	-0.322598	0.285153	0.385805	0.700567	0.712491	0.732433	0.99968	0.482678	0.629414
NZ_CP011454.1	3676198	3677297	+	CDS	GEMMAAP_RS15560	WP_145979169.1	IS3 family transposase	7.69405	-0.915533	-0.612394	-0.443963	-0.625112	-0.404881	-0.314149	0.00735067	0.0951203	0.49428	0.99968	0.172086	0.585135
NZ_CP011454.1	154362	154646	+	CDS	GEMMAAP_RS00695	WP_026849026.1	helix-hairpin-helix domain-containing protein	4.49009	-0.562194	0.016633	-0.441959	-0.327071	-0.0199779	-0.0922548	0.231705	0.990126	0.686058	0.99968	0.965482	0.922842
NZ_CP011454.1	614202	616307	-	CDS	GEMMAAP_RS02730	WP_053333984.1	response regulator	5.2606	0.423465	0.454479	-0.441093	0.225197	0.306998	-0.0918896	0.0769183	0.118475	0.293248	0.99968	0.120389	0.841035
NZ_CP011454.1	1404845	1405348	-	CDS	GEMMAAP_RS05830	WP_026849854.1	hypothetical protein	8.47941	-1.22093	-0.801024	-0.439388	-0.648332	-0.11321	-0.743821	0.00528801	0.08176	0.61806	0.99968	0.789902	0.213936
NZ_CP011454.1	4330299	4331486	-	CDS	GEMMAAP_RS18245	WP_082821475.1	patatin-like phospholipase family protein	7.29937	-0.236167	-0.204632	-0.438864	-0.153114	-0.485728	-0.048976	0.121999	0.24156	0.0230308	0.99968	0.000759464	0.877019
NZ_CP011454.1	3848461	3849075	-	CDS	GEMMAAP_RS16275	WP_026848363.1	hypothetical protein	4.31087	-0.357736	-0.1774	-0.43877	-0.283408	0.0918671	-0.116235	0.114452	0.585918	0.2474	0.99968	0.766071	0.806789
NZ_CP011454.1	3129097	3130530	+	CDS	GEMMAAP_RS13260	WP_026848808.1	TolC family protein	0.543889	-0.582098	0.109854	-0.43521	0.0177424	-0.350502	-0.730619	0.583707	0.962754	0.874901	0.99968	0.52072	0.502127
NZ_CP011454.1	4229796	4230101	-	CDS	GEMMAAP_RS17835	WP_026848135.1	hypothetical protein	3.34859	0.757094	0.695103	-0.434641	-0.103976	0.347352	0.395235	0.0325757	0.127653	0.512383	0.99968	0.224185	0.46572
NZ_CP011454.1	3814663	3816351	+	CDS	GEMMAAP_RS16125	WP_026848385.1	GMC family oxidoreductase	5.96393	-0.409878	-0.170155	-0.432028	-0.162485	0.123241	-0.0829455	0.0836967	0.60645	0.300345	0.99968	0.551165	0.854294
NZ_CP011454.1	3972168	3972614	+	CDS	GEMMAAP_RS16765	WP_158514907.1	hypothetical protein	2.77022	0.0565895	-0.25371	-0.432004	-0.280296	-0.17021	-0.190879	0.990367	0.625325	0.504594	0.99968	0.547606	0.741828
NZ_CP011454.1	1572308	1572631	+	CDS	GEMMAAP_RS06520	WP_202969200.1	hypothetical protein	6.12492	0.177062	0.291052	-0.430337	-0.090627	0.482623	-0.127923	0.289393	0.126644	0.0527442	0.99968	0.00153265	0.666269
NZ_CP011454.1	2023106	2026216	-	CDS	GEMMAAP_RS08395	WP_026850604.1	hypothetical protein	3.85464	-0.270001	-0.0149919	-0.430334	-0.248387	-0.157737	-0.164615	0.323126	0.981452	0.379207	0.99968	0.512757	0.729097
NZ_CP011454.1	4494489	4494995	+	CDS	GEMMAAP_RS18930	WP_202969166.1	acyl-CoA thioesterase	2.58671	0.000559117	-0.635958	-0.430135	0.0476612	-0.195238	-0.216913	0.99994	0.289181	0.645068	0.99968	0.570641	0.759707
NZ_CP011454.1	1856472	1856993	-	CDS	GEMMAAP_RS07680	WP_026850495.1	type 1 glutamine amidotransferase	4.99638	-0.0592876	-0.042459	-0.427411	-0.274026	-0.653899	0.0648103	0.895353	0.954961	0.500484	0.99968	0.00992787	0.922536
NZ_CP011454.1	1825925	1828099	+	CDS	GEMMAAP_RS07590	WP_158514770.1	TonB-dependent receptor	7.86589	-0.831982	0.381212	-0.42494	0.0434207	-0.520143	-0.575538	0.0233458	0.356558	0.560857	0.99968	0.103729	0.286709
NZ_CP011454.1	3862593	3865115	+	CDS	GEMMAAP_RS16360	WP_082821413.1	TonB-dependent receptor	5.32437	-0.231904	-0.379463	-0.424587	-0.163817	-0.00467542	-0.137958	0.299974	0.153746	0.2474	0.99968	0.984491	0.726411
NZ_CP011454.1	154684	156828	-	CDS	GEMMAAP_RS00700	WP_082820946.1	hypothetical protein	8.00507	0.725943	1.76799	-0.423638	-0.596873	0.572636	-0.184575	0.512956	0.127885	0.90846	0.99968	0.518365	0.935404
NZ_CP011454.1	454745	454975	-	CDS	GEMMAAP_RS02005	WP_145978954.1	ribbon-helix-helix domain-containing protein	4.51758	0.0181077	-0.0357435	-0.419517	-0.389338	-0.504948	0.200215	0.972534	0.959006	0.447219	0.99968	0.0274047	0.659949
NZ_CP011454.1	1728405	1728995	-	CDS	GEMMAAP_RS07175	WP_026850420.1	GNAT family N-acetyltransferase	4.87755	0.197624	0.195741	-0.419268	-0.139226	-0.135765	-0.183883	0.330993	0.45598	0.182211	0.99968	0.441848	0.584736
NZ_CP011454.1	4231151	4231537	-	CDS	GEMMAAP_RS17850	WP_053333537.1	DUF2200 domain-containing protein	3.94362	0.15928	0.290586	-0.417908	-0.0657018	-0.0876966	0.400773	0.645068	0.585918	0.49428	0.99968	0.758016	0.346165
NZ_CP011454.1	1080780	1081457	+	CDS	GEMMAAP_RS04500	WP_026850075.1	hypothetical protein	7.23493	-0.854233	-0.777209	-0.416752	-0.428335	-0.504493	-0.488274	0.013963	0.0498473	0.557418	0.99968	0.0909347	0.346075
NZ_CP011454.1	1033147	1034298	-	CDS	GEMMAAP_RS04305	WP_082821053.1	glycosyltransferase family 1 protein	4.52842	-0.908323	-0.633508	-0.416203	-0.54766	-0.107799	0.0829254	0.0534532	0.295039	0.707498	0.99968	0.80859	0.93905
NZ_CP011454.1	134796	137846	-	CDS	GEMMAAP_RS20800	WP_202969174.1	lamin tail domain-containing protein	1.9897	0.295805	0.632443	-0.415589	-0.291705	-0.118891	0.308477	0.657421	0.431369	0.751182	0.99968	0.793378	0.700306
NZ_CP011454.1	1522900	1524321	-	CDS	GEMMAAP_RS06285	WP_026850285.1	hypothetical protein	8.12112	-0.483551	-0.276479	-0.414262	-0.0260851	0.0400055	-0.0327765	0.0449421	0.313105	0.314854	0.99968	0.874263	0.963112
NZ_CP011454.1	4172015	4172857	-	CDS	GEMMAAP_RS17585	WP_026848172.1	NAD(P)H-binding protein	2.25796	-0.161738	-0.00394498	-0.412717	-0.202126	0.102444	-0.178443	0.854457	0.998154	0.823198	0.99968	0.856577	0.884019
NZ_CP011454.1	3602107	3603273	+	CDS	GEMMAAP_RS15230	WP_053333671.1	acyl-CoA/acyl-ACP dehydrogenase	4.35164	-0.0359525	-0.141038	-0.412638	-0.26259	0.210868	0.343226	0.92906	0.998718	0.397673	0.99968	0.333613	0.357581
NZ_CP011454.1	498545	499873	+	CDS	GEMMAAP_RS02170	WP_026849239.1	cation:proton antiporter	5.1428	-0.183143	-0.0533721	-0.411698	-0.316353	0.0760194	-0.189872	0.492608	0.922576	0.349872	0.99968	0.758171	0.667544
NZ_CP011454.1	4246739	4248424	-	CDS	GEMMAAP_RS17920	WP_026848121.1	gamma-glutamyltransferase	5.9509	-0.0513336	0.055029	-0.41161	-0.237948	-0.0322108	0.190233	0.878253	0.910232	0.331849	0.99968	0.894042	0.640121
NZ_CP011454.1	94124	96154	+	CDS	GEMMAAP_RS00390	WP_158514667.1	methyl-accepting chemotaxis protein	2.55933	-0.0388701	-0.34119	-0.410396	-0.122921	-0.538814	0.17747	0.955403	0.637654	0.699108	0.99968	0.102281	0.806789
NZ_CP011454.1	3718754	3719251	-	CDS	GEMMAAP_RS15750	WP_026848443.1	hypothetical protein	5.62642	-0.0640979	-0.308081	-0.409288	-0.122742	0.0974662	-0.0298638	0.829994	0.281042	0.308713	0.99968	0.654139	0.964545
NZ_CP011454.1	3153331	3154416	+	CDS	GEMMAAP_RS13335	WP_026848796.1	LptF/LptG family permease	5.84488	0.0113162	0.0959767	-0.40841	-0.259809	0.0466406	-0.121562	0.979529	0.793102	0.300345	0.99968	0.849102	0.777779
NZ_CP011454.1	2744210	2745556	-	CDS	GEMMAAP_RS11690	WP_043580687.1	MATE family efflux transporter	4.84713	-0.0641786	-0.0150208	-0.407585	-0.0407729	-0.318203	0.307158	0.931594	0.990612	0.73971	0.99968	0.43516	0.696007
NZ_CP011454.1	3097723	3098250	-	CDS	GEMMAAP_RS13130	WP_145979130.1	MarR family transcriptional regulator	6.19639	-0.990426	-0.393234	-0.406622	0.0842164	-1.24016	-0.0106401	0.00406687	0.314746	0.566627	0.99968	0.000181522	0.994981
NZ_CP011454.1	642648	645065	-	CDS	GEMMAAP_RS02825	WP_043580190.1	hypothetical protein	3.75731	-0.252598	-0.31864	-0.405952	0.185083	0.432179	-0.0380313	0.475986	0.556189	0.512263	0.99968	0.0693305	0.964233
NZ_CP011454.1	2965577	2966815	-	CDS	GEMMAAP_RS12585	WP_026849496.1	RagB/SusD family nutrient uptake outer membrane protein	6.87784	0.174205	0.0617075	-0.405888	0.022161	-0.183216	0.143668	0.315446	0.824562	0.0954971	0.99968	0.209648	0.614524
NZ_CP011454.1	1495901	1496785	+	CDS	GEMMAAP_RS06160	WP_053334321.1	sugar phosphate isomerase/epimerase	6.91658	-0.2961	-0.147013	-0.401802	-0.25581	-0.286555	-0.63481	0.267926	0.69828	0.424212	0.99968	0.219936	0.073472
NZ_CP011454.1	3304199	3304438	+	CDS	GEMMAAP_RS14005	WP_026848692.1	DUF4160 domain-containing protein	6.51043	-0.753854	-0.858614	-0.401571	-0.584226	-0.582855	-0.439824	0.0184616	0.029869	0.546297	0.99968	0.0311349	0.346075
NZ_CP011454.1	2831297	2831917	+	CDS	GEMMAAP_RS12010	WP_026849582.1	hypothetical protein	3.21073	-0.212366	0.113618	-0.400563	0.0548181	0.00912876	-0.0206815	0.670881	0.899612	0.686058	0.99968	0.984491	0.993222
NZ_CP011454.1	4350235	4350915	+	CDS	GEMMAAP_RS18335	WP_053334570.1	ankyrin repeat domain-containing protein	4.82001	0.30488	0.102733	-0.399866	-0.0897376	-0.788745	0.0194893	0.281492	0.846325	0.49428	0.99968	0.00112798	0.985064
NZ_CP011454.1	1536978	1537655	+	CDS	GEMMAAP_RS06365	WP_026850297.1	gliding-motility protein MglA	8.54031	-0.199106	-0.0442328	-0.399386	-0.0731574	0.160649	0.0140881	0.580764	0.947322	0.528018	0.99968	0.604626	0.993477
NZ_CP011454.1	3907851	3908783	+	CDS	GEMMAAP_RS16515	WP_043579682.1	arginase	8.58736	0.42197	0.291827	-0.399033	0.197502	-0.452709	0.302282	0.0806616	0.279299	0.326719	0.99968	0.0325844	0.41569
NZ_CP011454.1	289196	290650	+	CDS	GEMMAAP_RS01285	WP_202969176.1	NAD(P)(+) transhydrogenase (Re/Si-specific) subunit beta	5.81787	0.623339	0.764137	-0.399017	0.300629	0.928171	0.0228959	0.0143924	0.01577	0.385488	0.99968	0.000369358	0.98413
NZ_CP011454.1	4659383	4660099	-	CDS	GEMMAAP_RS19610	WP_026848887.1	ATP-binding cassette domain-containing protein	3.76353	-0.216066	-0.229712	-0.398545	-0.108729	0.111948	0.153216	0.467558	0.637654	0.475681	0.99968	0.692764	0.771957
NZ_CP011454.1	476608	477678	-	CDS	GEMMAAP_RS20465	WP_026849227.1	hypothetical protein	2.69205	-0.353895	0.129597	-0.397693	-0.335283	-0.476985	0.0107271	0.540016	0.914087	0.754549	0.99968	0.161749	0.996064
NZ_CP011454.1	2068761	2069465	+	CDS	GEMMAAP_RS08625	WP_026850635.1	hypothetical protein	7.15207	-0.819374	-0.592021	-0.397099	-0.541227	-0.24048	-0.354137	0.0107492	0.0964743	0.534659	0.99968	0.407618	0.496062
NZ_CP011454.1	3059932	3060369	+	CDS	GEMMAAP_RS12965	WP_026849439.1	hypothetical protein	5.64765	-0.0607621	-0.105103	-0.39687	-0.139269	-0.186345	-0.340701	0.852675	0.791367	0.407785	0.99968	0.395622	0.359044
NZ_CP011454.1	277441	277908	-	CDS	GEMMAAP_RS01230	WP_026849108.1	arginine repressor	4.45833	-0.0496898	0.152337	-0.396497	-0.0601464	-0.0559022	0.410442	0.925493	0.799557	0.605597	0.99968	0.866014	0.391684
NZ_CP011454.1	3304410	3304685	+	CDS	GEMMAAP_RS14010	WP_026848691.1	DUF2442 domain-containing protein	6.59541	-0.726286	-0.875049	-0.39507	-0.56797	-0.626999	-0.53442	0.0106259	0.0156604	0.486471	0.99968	0.0104664	0.177756
NZ_CP011454.1	4182582	4183034	-	CDS	GEMMAAP_RS17635	WP_043579322.1	acyl-CoA thioesterase	4.28786	0.090901	0.261643	-0.394989	0.174561	0.27412	-0.136797	0.860074	0.657684	0.639628	0.99968	0.369905	0.84318
NZ_CP011454.1	2890413	2890778	-	CDS	GEMMAAP_RS12245	WP_026849549.1	NADH-quinone oxidoreductase subunit A	6.09794	-0.542482	-0.461796	-0.394972	-0.025725	-0.414152	-0.381925	0.0233458	0.103897	0.377158	0.99968	0.0433032	0.275558
NZ_CP011454.1	264960	265394	+	CDS	GEMMAAP_RS20805	WP_026849092.1	hypothetical protein	6.95473	-0.83119	-0.83984	-0.394893	-0.275132	-0.360114	0.0584618	0.00148177	0.00893396	0.378018	0.99968	0.0874074	0.916712
NZ_CP011454.1	1860900	1861424	+	CDS	GEMMAAP_RS07700	WP_043581560.1	hypoxanthine phosphoribosyltransferase	8.63105	-0.491797	-0.519448	-0.394164	-0.330291	0.126725	-0.199375	0.0203629	0.0300555	0.246354	0.99968	0.522229	0.578654
NZ_CP011454.1	121193	122104	+	CDS	GEMMAAP_RS00515	WP_043580079.1	homocysteine S-methyltransferase	4.41356	0.0651825	0.0313531	-0.393927	-0.0793205	-0.437577	0.0611038	0.863537	0.962754	0.475714	0.99968	0.0745352	0.927073
NZ_CP011454.1	145840	146817	-	CDS	GEMMAAP_RS00640	WP_026849018.1	SDR family NAD(P)-dependent oxidoreductase	4.85336	-0.577909	-0.343693	-0.393674	-0.463066	-0.211139	-0.122495	0.0404941	0.348176	0.495366	0.99968	0.384044	0.8133
NZ_CP011454.1	2484178	2484636	+	CDS	GEMMAAP_RS10595	WP_053334170.1	Hsp20/alpha crystallin family protein	3.79422	-0.602279	-0.640866	-0.393547	-0.36295	0.0839521	0.156359	0.146194	0.236483	0.691681	0.99968	0.835831	0.840227
NZ_CP011454.1	2864276	2866072	+	CDS	GEMMAAP_RS12130	WP_026849566.1	FAD-dependent oxidoreductase	7.16962	-0.633479	-0.528337	-0.393449	-0.0856592	-0.724782	-0.476386	0.00458396	0.0383164	0.300345	0.99968	0.000421674	0.098234
NZ_CP011454.1	1514203	1515708	-	CDS	GEMMAAP_RS06235	WP_053334326.1	GspE/PulE family protein	5.77449	0.276436	0.488309	-0.390173	-0.151497	0.48626	0.155933	0.166484	0.044706	0.237528	0.99968	0.00566803	0.659705
NZ_CP011454.1	1081512	1083272	+	CDS	GEMMAAP_RS04505	WP_026850074.1	hypothetical protein	7.68543	-0.552816	-0.0834707	-0.389615	-0.29521	-0.53726	-0.456677	0.15946	0.910487	0.651467	0.99968	0.120389	0.471608
NZ_CP011454.1	4675042	4675710	+	CDS	GEMMAAP_RS19700	WP_053333833.1	sigma-70 family RNA polymerase sigma factor	5.36788	0.149047	0.271544	-0.389599	-0.0452846	0.0729796	0.174871	0.624723	0.441527	0.422737	0.99968	0.767318	0.687168
NZ_CP011454.1	1852878	1853891	-	CDS	GEMMAAP_RS07660	WP_043581369.1	nitronate monooxygenase	5.11642	0.266186	0.27595	-0.389519	0.0405962	0.352544	0.0673199	0.188477	0.278188	0.246354	0.99968	0.0321134	0.998029
NZ_CP011454.1	4627871	4628569	-	CDS	GEMMAAP_RS19460	WP_026848862.1	hypothetical protein	5.27094	-0.0902016	0.192608	-0.389479	-0.152235	0.179129	0.150382	0.749229	0.550035	0.326719	0.99968	0.352702	0.69578
NZ_CP011454.1	616294	618537	-	CDS	GEMMAAP_RS02735	WP_158514700.1	PAS domain-containing protein	5.77589	0.219229	0.286485	-0.388259	0.164359	0.125409	0.104344	0.271578	0.232763	0.243976	0.99968	0.479334	0.767056
NZ_CP011454.1	4053477	4053833	+	CDS	GEMMAAP_RS17095	WP_026848241.1	nuclear transport factor 2 family protein	4.35826	-0.407743	-0.453233	-0.388111	-0.248725	0.0440752	0.342435	0.229504	0.302687	0.59311	0.99968	0.891325	0.493589
NZ_CP011454.1	3340395	3340907	+	CDS	GEMMAAP_RS14170	WP_026848668.1	hypothetical protein	7.22598	-1.41571	-0.160202	-0.387396	0.115859	-0.242838	-0.220308	0.0594332	0.910661	0.868715	0.99968	0.731771	0.884019
NZ_CP011454.1	4496913	4497251	+	CDS	GEMMAAP_RS18945	WP_026850977.1	ribbon-helix-helix protein%2C CopG family	3.92564	0.225662	0.272026	-0.387293	-0.0157454	-0.237995	0.049122	0.542571	0.585918	0.57812	0.99968	0.400388	0.954928
NZ_CP011454.1	2938619	2939014	+	CDS	GEMMAAP_RS12465	WP_026849516.1	hypothetical protein	1.1964	0.314691	0.415989	-0.385451	-0.409891	0.399815	0.61071	0.648323	0.675468	0.81864	0.99968	0.399576	0.491008
NZ_CP011454.1	106988	107494	+	CDS	GEMMAAP_RS00450	WP_026848996.1	hypothetical protein	4.63638	0.106715	0.076642	-0.384377	-0.166036	-0.111579	0.1705	0.679209	0.951335	0.340068	0.99968	0.569813	0.646991
NZ_CP011454.1	4453364	4454317	-	CDS	GEMMAAP_RS18755	WP_026850953.1	calcium/sodium antiporter	4.61148	-0.876047	-0.831854	-0.383131	-0.270995	-0.770086	-0.260876	0.00269711	0.0215075	0.494565	0.99968	0.00221779	0.575106
NZ_CP011454.1	323376	323906	-	CDS	GEMMAAP_RS01435	WP_053333920.1	MerR family transcriptional regulator	5.91303	0.0552139	0.0990443	-0.380929	-0.0197815	0.393638	-0.00088125	0.983876	0.772317	0.300345	0.99968	0.0265232	0.999165
NZ_CP011454.1	74260	75168	+	CDS	GEMMAAP_RS00315	WP_075071586.1	hypothetical protein	4.09717	-0.192787	0.217382	-0.377865	0.000431164	-0.121969	0.694865	0.542498	0.597707	0.512383	0.99968	0.629191	0.0453218
NZ_CP011454.1	1439482	1441401	+	CDS	GEMMAAP_RS05945	WP_026849836.1	glycoside hydrolase family 3 C-terminal domain-containing protein	6.48644	-0.341086	-0.0296811	-0.377638	-0.230442	-0.0749661	-0.40324	0.212488	0.961711	0.49428	0.99968	0.785968	0.326227
NZ_CP011454.1	4329222	4330268	-	CDS	GEMMAAP_RS18240	WP_053334567.1	sulfite oxidase	6.36695	0.39059	0.468414	-0.377341	-0.0698737	0.0968617	0.164232	0.0170437	0.018865	0.106268	0.99968	0.520096	0.539438
NZ_CP011454.1	4701866	4702210	-	CDS	GEMMAAP_RS19820	WP_053334023.1	metalloregulator ArsR/SmtB family transcription factor	6.22824	-0.404534	-0.0828486	-0.375703	-0.0792865	-0.438537	0.263727	0.0683985	0.824562	0.326719	0.99968	0.0218048	0.438489
NZ_CP011454.1	1046682	1047236	-	CDS	GEMMAAP_RS04355	WP_026850092.1	DUF4199 domain-containing protein	4.54463	-0.0401024	-0.0791793	-0.372247	-0.423846	0.0902555	0.178158	0.951778	0.932631	0.701436	0.99968	0.818754	0.808651
NZ_CP011454.1	3649768	3650199	-	CDS	GEMMAAP_RS20645	WP_053333659.1	M23 family metallopeptidase	6.10013	0.0151638	0.322347	-0.372005	-0.143614	-0.143246	0.226138	0.965824	0.158869	0.269978	0.99968	0.415783	0.46572
NZ_CP011454.1	2795573	2796151	-	CDS	GEMMAAP_RS11880	WP_053334100.1	DUF2911 domain-containing protein	8.10724	-0.742264	-0.752599	-0.371919	-0.311008	-0.549122	-0.676739	0.0316456	0.0536345	0.615802	0.99968	0.0711959	0.177369
NZ_CP011454.1	1281247	1281645	-	CDS	GEMMAAP_RS05370	WP_075071436.1	GxxExxY protein	0.335447	0.0495709	-0.000656986	-0.371567	-0.0100614	-0.415773	-0.921044	0.967436	0.999304	0.892701	0.99968	0.543255	0.526707
NZ_CP011454.1	4572258	4573391	-	CDS	GEMMAAP_RS19255	WP_026851026.1	WYL domain-containing protein	4.75355	0.090004	0.235624	-0.371102	-0.0511948	0.0636664	0.162256	0.70244	0.348961	0.2474	0.99968	0.734737	0.629414
NZ_CP011454.1	152291	153232	-	CDS	GEMMAAP_RS19900	WP_026849025.1	MBL fold metallo-hydrolase	2.07394	-0.520508	0.216028	-0.370717	0.212059	0.138946	0.0399332	0.648227	0.922951	0.942304	0.99968	0.830809	0.98831
NZ_CP011454.1	4050544	4050825	-	CDS	GEMMAAP_RS17080	WP_075071556.1	Rrf2 family transcriptional regulator	3.87298	-0.0941469	-0.190315	-0.370546	-0.168855	0.587242	-0.212481	0.905581	0.861751	0.79687	0.99968	0.144796	0.817825
NZ_CP011454.1	4049621	4050460	-	CDS	GEMMAAP_RS17075	WP_053333581.1	hypothetical protein	6.14667	-3.17842	-1.64695	-0.369468	-0.208278	-3.53645	-1.39102	0.000734501	0.0888605	0.886609	0.99968	3.11994e-05	0.154242
NZ_CP011454.1	1950792	1951967	+	CDS	GEMMAAP_RS08065	WP_026850554.1	glycosyltransferase family 4 protein	8.28885	-0.156935	-0.159005	-0.366948	-0.342482	0.116965	0.047687	0.399512	0.455463	0.178194	0.99968	0.483839	0.908156
NZ_CP011454.1	2639536	2640393	-	CDS	GEMMAAP_RS11260	WP_158514831.1	LytTR family DNA-binding domain-containing protein	8.66919	-1.02627	-0.781078	-0.366786	-0.620517	-0.210512	-0.387323	0.000734501	0.0167026	0.49428	0.99968	0.409731	0.355382
NZ_CP011454.1	3196659	3196892	-	CDS	GEMMAAP_RS13525	WP_026848766.1	hypothetical protein	8.31422	-0.115009	-0.1104	-0.366553	-0.246141	-0.0101743	0.107259	0.660807	0.730631	0.345993	0.99968	0.968797	0.803613
NZ_CP011454.1	4258438	4261068	-	CDS	GEMMAAP_RS17955	WP_026848115.1	multicopper oxidase domain-containing protein	4.6599	-0.650988	-0.414908	-0.365781	-0.304923	-0.186381	-0.0797141	0.00578103	0.140962	0.372004	0.99968	0.329728	0.856916
NZ_CP011454.1	249921	251432	+	CDS	GEMMAAP_RS01075	WP_026849079.1	Gfo/Idh/MocA family oxidoreductase	6.80934	-0.19152	-0.274959	-0.3652	-0.0687706	0.201812	-0.175806	0.417246	0.297257	0.36852	0.99968	0.30813	0.655851
NZ_CP011454.1	3648125	3648736	+	CDS	GEMMAAP_RS15415	WP_053333661.1	isoprenylcysteine carboxylmethyltransferase family protein	7.55143	-0.288374	0.73811	-0.365064	-0.144951	0.234542	0.0173434	0.645883	0.227324	0.807152	0.99968	0.655485	0.994981
NZ_CP011454.1	1807972	1809681	+	CDS	GEMMAAP_RS07530	WP_026850471.1	dihydroxy-acid dehydratase	5.47436	-0.0355151	-0.0424528	-0.360864	-0.0825873	-0.330813	-0.100313	0.913746	0.931995	0.365873	0.99968	0.0697195	0.803079
NZ_CP011454.1	1038060	1039439	-	CDS	GEMMAAP_RS04325	WP_043581081.1	DUF1552 domain-containing protein	5.44408	0.115855	0.426709	-0.358832	0.158826	0.576446	-0.0141639	0.661896	0.122452	0.397479	0.99968	0.0020535	0.987683
NZ_CP011454.1	2395210	2396727	-	CDS	GEMMAAP_RS10175	WP_043581626.1	histidine ammonia-lyase	6.66196	-0.321961	-0.314778	-0.358507	-0.380431	0.443273	-0.341229	0.188603	0.272834	0.438483	0.99968	0.0405226	0.380415
NZ_CP011454.1	4229337	4229786	+	CDS	GEMMAAP_RS17830	WP_026848136.1	hypothetical protein	4.27885	-0.263429	0.193815	-0.357636	-0.0992962	-0.517927	0.114265	0.479721	0.731463	0.65704	0.99968	0.0716769	0.867594
NZ_CP011454.1	4485211	4485633	-	CDS	GEMMAAP_RS18895	WP_026850971.1	hypothetical protein	3.42469	-0.197377	-0.403129	-0.357545	0.0725397	-0.277925	-0.121851	0.567996	0.352366	0.610957	0.99968	0.262447	0.825111
NZ_CP011454.1	400271	400786	+	CDS	GEMMAAP_RS01795	WP_145978949.1	lipocalin-like domain-containing protein	4.07425	0.169094	-0.261168	-0.35738	-0.0939941	0.305406	0.299016	0.625557	0.547891	0.59311	0.99968	0.227137	0.54129
NZ_CP011454.1	2495226	2495750	-	CDS	GEMMAAP_RS10645	WP_026849784.1	hypothetical protein	6.4928	-0.377716	-0.301083	-0.35707	-0.0361651	-0.166872	0.152051	0.0552028	0.195526	0.299389	0.99968	0.336309	0.655868
NZ_CP011454.1	883564	884955	+	CDS	GEMMAAP_RS03720	WP_026850192.1	nucleotide sugar dehydrogenase	7.94453	-0.643451	-0.721333	-0.355777	-0.547408	0.114275	-0.648227	0.0941386	0.0925297	0.686058	0.99968	0.769356	0.255933
NZ_CP011454.1	2973039	2973872	-	CDS	GEMMAAP_RS12610	WP_158514848.1	UbiA family prenyltransferase	5.4712	-0.0943957	0.444854	-0.355673	0.0602296	-0.602389	0.158982	0.808021	0.22534	0.59311	0.99968	0.0205536	0.766457
NZ_CP011454.1	4136687	4137379	-	CDS	GEMMAAP_RS20850	WP_202969163.1	PEP-CTERM sorting domain-containing protein	6.29698	-0.534213	-0.75796	-0.354313	-0.292594	-0.305457	-0.503856	0.141214	0.0838024	0.679976	0.99968	0.345292	0.367043
NZ_CP011454.1	66642	67148	+	CDS	GEMMAAP_RS00285	WP_026848972.1	hypothetical protein	5.51387	-0.620452	0.0381907	-0.35412	-0.427869	-0.0391313	0.150644	0.0572462	0.959241	0.631855	0.99968	0.91351	0.812219
NZ_CP011454.1	3486128	3486988	-	CDS	GEMMAAP_RS14745	WP_026848581.1	zinc metallopeptidase	5.05678	0.112143	0.122642	-0.353319	-0.0242415	-0.106916	0.105133	0.559201	0.618701	0.212609	0.99968	0.497667	0.73027
NZ_CP011454.1	3806680	3808029	+	CDS	GEMMAAP_RS16085	WP_053333631.1	sigma-70 family RNA polymerase sigma factor	4.89735	0.187829	0.0810622	-0.353177	-0.0905431	-0.298504	-0.105015	0.370666	0.81553	0.326018	0.99968	0.0787141	0.771957
NZ_CP011454.1	2786386	2788230	+	CDS	GEMMAAP_RS11840	WP_026849608.1	efflux RND transporter periplasmic adaptor subunit	5.31852	0.417249	0.416814	-0.352069	0.0300528	0.127704	0.37425	0.101869	0.180878	0.49428	0.99968	0.569248	0.29065
NZ_CP011454.1	3277282	3278043	+	CDS	GEMMAAP_RS13880	WP_026848710.1	metallophosphatase family protein	4.05393	0.440409	0.132174	-0.351983	-0.141401	-0.233057	0.0670088	0.231705	0.854012	0.686058	0.99968	0.430121	0.932643
NZ_CP011454.1	40901	41611	-	CDS	GEMMAAP_RS00175	WP_053333855.1	SIMPL domain-containing protein	8.69521	0.172806	-0.229291	-0.351302	-0.480502	0.57968	0.10894	0.815427	0.787566	0.825188	0.99968	0.256682	0.939702
NZ_CP011454.1	925577	925948	-	CDS	GEMMAAP_RS03865	WP_026850168.1	response regulator	6.49194	0.15634	-0.100808	-0.351182	0.0589213	-0.0196841	-0.177353	0.429975	0.763685	0.293248	0.99968	0.923482	0.579955
NZ_CP011454.1	2070009	2070497	+	CDS	GEMMAAP_RS08635	WP_075071467.1	D-glycero-beta-D-manno-heptose 1-phosphate adenylyltransferase	6.48837	-0.208172	0.0518757	-0.350994	-0.363508	-0.0625539	0.0413395	0.401404	0.914644	0.434414	0.99968	0.797955	0.948452
NZ_CP011454.1	764324	766228	-	CDS	GEMMAAP_RS03285	WP_082821017.1	aspartate ammonia-lyase	5.93534	-0.161202	-0.118057	-0.350649	-0.18504	-0.0063509	-0.0158376	0.392274	0.651253	0.259496	0.99968	0.974133	0.980408
NZ_CP011454.1	1831653	1833827	-	CDS	GEMMAAP_RS07605	WP_043581367.1	alpha-glucan family phosphorylase	7.98458	0.00368671	-0.105366	-0.350499	-0.248615	0.0466433	-0.0491383	0.996036	0.756141	0.410845	0.99968	0.851789	0.928109
NZ_CP011454.1	1505817	1506071	+	CDS	GEMMAAP_RS06200	WP_026850270.1	GlsB/YeaQ/YmgE family stress response membrane protein	2.50212	-0.702656	-1.32044	-0.350265	-0.450498	-0.619379	-0.410225	0.143971	0.0658344	0.802605	0.99968	0.135988	0.638756
NZ_CP011454.1	1606423	1607670	-	CDS	GEMMAAP_RS06675	WP_082821547.1	ABC transporter permease	6.97574	-0.848011	-0.862657	-0.348042	-0.446049	0.64198	-0.457678	0.0896177	0.127885	0.797716	0.99968	0.139305	0.593513
NZ_CP011454.1	2739116	2740384	-	CDS	GEMMAAP_RS11665	WP_026849637.1	M20/M25/M40 family metallo-hydrolase	5.75982	-0.171708	-0.112928	-0.347583	-0.197288	-0.17564	0.211653	0.663309	0.862726	0.665748	0.99968	0.54626	0.701479
NZ_CP011454.1	1873850	1874215	+	CDS	GEMMAAP_RS07760	WP_026850504.1	response regulator	5.55617	0.125895	0.150063	-0.344727	-0.331614	0.0985778	0.00112607	0.656074	0.674737	0.477101	0.99968	0.68149	0.999165
NZ_CP011454.1	494520	495182	-	CDS	GEMMAAP_RS02145	WP_053333964.1	nitroreductase family protein	3.2335	-0.409651	0.0404966	-0.344139	-0.284933	-0.284391	-0.0290892	0.191737	0.96378	0.643294	0.99968	0.241089	0.977423
NZ_CP011454.1	3130544	3131791	+	CDS	GEMMAAP_RS13265	WP_026848807.1	efflux RND transporter periplasmic adaptor subunit	1.32771	-0.866936	-0.627768	-0.343099	-0.403012	-0.318768	0.300223	0.19591	0.55409	0.858419	0.99968	0.528745	0.76252
NZ_CP011454.1	2380277	2381386	-	CDS	GEMMAAP_RS10120	WP_053334471.1	Xaa-Pro peptidase family protein	6.78538	-0.038337	0.0325281	-0.342316	-0.162285	0.311967	0.242219	0.887704	0.934322	0.300345	0.99968	0.0605936	0.408649
NZ_CP011454.1	1788581	1788994	+	CDS	GEMMAAP_RS07430	WP_145979046.1	hypothetical protein	7.81006	-0.576401	-0.241148	-0.341631	-0.247303	-0.215307	0.270073	0.0135998	0.368554	0.413369	0.99968	0.296131	0.466383
NZ_CP011454.1	2699991	2701358	-	CDS	GEMMAAP_RS11505	WP_053334118.1	amino acid permease	5.65289	-0.415627	-0.292766	-0.341251	-0.270827	-0.220558	-0.171937	0.069136	0.313663	0.428862	0.99968	0.255319	0.659705
NZ_CP011454.1	4674518	4675045	+	CDS	GEMMAAP_RS19695	WP_026848901.1	DUF6428 family protein	5.99891	-0.000887727	0.139494	-0.340714	-0.1656	0.0832822	0.132101	0.999138	0.770123	0.326018	0.99968	0.652852	0.698576
NZ_CP011454.1	1518051	1518626	-	CDS	GEMMAAP_RS06250	WP_026850278.1	hypothetical protein	4.43575	0.17863	0.385433	-0.340597	0.00135163	0.408937	0.258189	0.481351	0.182302	0.470514	0.99968	0.04172	0.50617
NZ_CP011454.1	3437817	3439079	-	CDS	GEMMAAP_RS14565	WP_026848605.1	4-hydroxy-3-methylbut-2-enyl diphosphate reductase	7.44082	-0.0303878	-0.0590077	-0.339429	-0.0210081	-0.53937	-0.204658	0.895353	0.898952	0.164114	0.99968	0.000482081	0.402999
NZ_CP011454.1	4532012	4532467	+	CDS	GEMMAAP_RS19075	WP_026850998.1	DUF2269 family protein	4.85303	-0.342773	-0.548167	-0.339422	0.0307702	-0.0718257	-0.289023	0.235917	0.129253	0.576739	0.99968	0.797205	0.526485
NZ_CP011454.1	1036152	1038032	-	CDS	GEMMAAP_RS04320	WP_082821054.1	ankyrin repeat domain-containing protein	5.66299	0.0638669	0.435784	-0.339388	0.0818189	0.689666	-0.0893862	0.983876	0.087296	0.360568	0.99968	0.000228246	0.809282
NZ_CP011454.1	1190974	1193010	+	CDS	GEMMAAP_RS04920	WP_053334250.1	heme lyase CcmF/NrfE family subunit	8.87883	-0.384125	-0.173291	-0.33886	-0.0480238	0.105855	-0.394411	0.0205366	0.349873	0.174025	0.99968	0.493152	0.0722199
NZ_CP011454.1	3640897	3641496	-	CDS	GEMMAAP_RS15380	WP_053333666.1	sigma-70 family RNA polymerase sigma factor	9.31705	-0.536532	-0.565987	-0.338619	-0.59602	0.385223	-0.469404	0.198123	0.214397	0.727573	0.99968	0.302769	0.49069
NZ_CP011454.1	3542101	3542496	-	CDS	GEMMAAP_RS14965	WP_053333683.1	MerC domain-containing protein	4.67024	-0.821539	-0.238721	-0.3379	-0.0481883	-0.354458	-0.176022	0.014485	0.61496	0.65704	0.99968	0.22186	0.773541
NZ_CP011454.1	4660583	4660810	-	CDS	GEMMAAP_RS19620	WP_145979262.1	hypothetical protein	4.00992	0.359809	-0.0756459	-0.337749	0.0663338	-0.600865	-0.204169	0.274612	0.919334	0.645068	0.99968	0.0255235	0.716356
NZ_CP011454.1	2862873	2864021	-	CDS	GEMMAAP_RS12125	WP_026849567.1	N-methyl-L-tryptophan oxidase	4.47621	-0.200708	-0.166757	-0.334988	-0.100299	-0.343624	-0.0708014	0.467558	0.681213	0.519783	0.99968	0.0962343	0.892842
NZ_CP011454.1	4098484	4099296	+	CDS	GEMMAAP_RS17295	WP_026848214.1	SDR family oxidoreductase	4.78004	0.304468	0.160835	-0.33495	0.0766302	0.409385	0.419863	0.192126	0.739484	0.475681	0.99968	0.0335317	0.194606
NZ_CP011454.1	2719319	2719795	-	CDS	GEMMAAP_RS11585	WP_026849646.1	hypothetical protein	5.20819	-0.00615987	-0.549567	-0.334682	-0.139471	-0.149607	0.230178	0.994295	0.127454	0.609542	0.99968	0.609226	0.673593
NZ_CP011454.1	1542851	1544113	+	CDS	GEMMAAP_RS06400	WP_026850301.1	dicarboxylate/amino acid:cation symporter	6.45191	-0.529141	-0.445172	-0.33393	-0.293271	-0.0882718	-0.242688	0.0532745	0.157281	0.560537	0.99968	0.749134	0.614094
NZ_CP011454.1	2753840	2755021	+	CDS	GEMMAAP_RS11725	WP_026849628.1	hypothetical protein	5.62426	-0.157424	-0.18526	-0.333635	0.103655	0.0653888	-0.262845	0.629418	0.653153	0.59311	0.99968	0.815252	0.568619
NZ_CP011454.1	271374	271931	+	CDS	GEMMAAP_RS01195	WP_026849101.1	outer membrane beta-barrel protein	8.82916	-0.336822	-0.536399	-0.333449	-0.292923	0.47993	-0.0797457	0.324167	0.137854	0.645068	0.99968	0.100898	0.916712
NZ_CP011454.1	893492	894004	+	CDS	GEMMAAP_RS20260	WP_145978985.1	IPT/TIG domain-containing protein	4.8367	-0.0646724	0.187541	-0.332319	-0.0508344	0.276956	0.0976087	0.823109	0.545557	0.447219	0.99968	0.129942	0.81101
NZ_CP011454.1	4187176	4187433	-	CDS	GEMMAAP_RS20395	WP_145979217.1	hypothetical protein	4.85655	-0.653319	-0.271582	-0.33216	-0.0416269	-0.421782	0.413824	0.0610489	0.595847	0.69653	0.99968	0.11441	0.369166
NZ_CP011454.1	3533854	3535170	-	CDS	GEMMAAP_RS14930	WP_026848558.1	aminopeptidase P family protein	6.61684	-0.0850365	-0.154364	-0.332119	-0.126079	-0.102114	-0.21542	0.648227	0.446081	0.198815	0.99968	0.489665	0.374705
NZ_CP011454.1	4473701	4474303	+	CDS	GEMMAAP_RS18830	WP_053334598.1	CDP-alcohol phosphatidyltransferase family protein	4.08278	0.0377297	0.271236	-0.331645	-0.127705	0.166496	0.0584441	0.996113	0.451554	0.558547	0.99968	0.466976	0.922536
NZ_CP011454.1	4364270	4365142	+	CDS	GEMMAAP_RS18390	WP_053334574.1	GNAT family N-acetyltransferase	2.44869	-0.37181	-0.258506	-0.331539	-0.229038	-0.848615	0.14159	0.385459	0.718074	0.744438	0.99968	0.00598943	0.826461
NZ_CP011454.1	1515716	1517500	-	CDS	GEMMAAP_RS06240	WP_026850276.1	hypothetical protein	5.51034	0.0284973	0.114732	-0.331481	-0.00593223	0.242046	-0.0069399	0.930767	0.725963	0.410845	0.99968	0.176899	0.994981
NZ_CP011454.1	253930	254706	-	CDS	GEMMAAP_RS01090	WP_026849081.1	DUF4397 domain-containing protein	4.5212	0.234672	0.0164605	-0.330411	-0.0937735	0.451152	0.127724	0.281586	0.973561	0.410845	0.99968	0.0233401	0.771957
NZ_CP011454.1	2932146	2932922	-	CDS	GEMMAAP_RS12430	WP_082821284.1	ubiquinone/menaquinone biosynthesis methyltransferase	6.01415	-0.509604	-0.579742	-0.330245	-0.202815	-0.280913	0.0131674	0.0221142	0.0375646	0.443126	0.99968	0.133897	0.98831
NZ_CP011454.1	451110	451337	+	CDS	GEMMAAP_RS01985	WP_026849217.1	hypothetical protein	4.92554	-0.580747	-0.262968	-0.328471	-0.317671	-0.621487	0.176129	0.0433826	0.507478	0.601343	0.99968	0.0098278	0.715667
NZ_CP011454.1	3983716	3984180	-	CDS	GEMMAAP_RS16820	WP_053333589.1	acyl-CoA thioesterase	3.37562	0.406732	0.604324	-0.328348	-0.159225	0.803864	0.166457	0.226513	0.147088	0.674549	0.99968	0.00354446	0.913254
NZ_CP011454.1	429203	429559	-	CDS	GEMMAAP_RS01905	WP_026849203.1	metalloregulator ArsR/SmtB family transcription factor	4.81134	0.672905	-0.124274	-0.327553	0.0940226	0.378707	0.256015	0.0534532	0.855736	0.701436	0.99968	0.179258	0.655851
NZ_CP011454.1	2637533	2638504	-	CDS	GEMMAAP_RS11250	WP_053334136.1	alpha/beta hydrolase	5.45111	-0.647511	-0.524795	-0.326719	-0.297594	-0.550292	-0.559533	0.0242311	0.127454	0.600148	0.99968	0.0309066	0.194606
NZ_CP011454.1	1162158	1163075	+	CDS	GEMMAAP_RS04790	WP_145979009.1	hypothetical protein	6.98336	-0.920717	-0.422759	-0.326644	-0.313224	-0.333473	-0.547718	0.0170437	0.342488	0.719077	0.99968	0.321927	0.342104
NZ_CP011454.1	3907294	3907713	-	CDS	GEMMAAP_RS16510	WP_026848323.1	Lrp/AsnC family transcriptional regulator	2.03124	0.168777	0.333827	-0.324779	-0.575535	-0.402584	-0.131496	0.765228	0.652508	0.812881	0.99968	0.244529	0.900925
NZ_CP011454.1	1417623	1419320	-	CDS	GEMMAAP_RS05870	WP_075071445.1	FAD-dependent oxidoreductase	4.81912	-0.863181	-0.428651	-0.323744	-0.173447	-1.5141	-0.91474	0.0095148	0.307524	0.686058	0.99968	6.34198e-06	0.0226704
NZ_CP011454.1	665666	667000	+	CDS	GEMMAAP_RS02885	WP_053333993.1	VWA domain-containing protein	4.79779	-0.0567736	-0.22149	-0.323404	0.0731536	-0.451831	-0.535909	0.948852	0.81978	0.837897	0.99968	0.28954	0.50196
NZ_CP011454.1	4445456	4446730	+	CDS	GEMMAAP_RS18720	WP_026850947.1	hypothetical protein	3.50006	0.142668	-0.0945796	-0.322428	-0.313164	-0.654735	-0.15699	0.764588	0.91686	0.755185	0.99968	0.0489046	0.835671
NZ_CP011454.1	19397	20002	+	CDS	GEMMAAP_RS00095	WP_026848944.1	NAD(P)-binding domain-containing protein	2.59934	0.387263	0.211093	-0.321117	0.0675337	-0.16751	0.282791	0.332764	0.770123	0.751381	0.99968	0.593025	0.634728
NZ_CP011454.1	3072238	3072708	-	CDS	GEMMAAP_RS13030	WP_026849430.1	Cys-tRNA(Pro) deacylase	3.09975	-0.328505	-0.172969	-0.320365	-0.369339	-0.665052	0.199156	0.556192	0.868439	0.829258	0.99968	0.0762639	0.806781
NZ_CP011454.1	1083284	1083712	+	CDS	GEMMAAP_RS04510	WP_145978999.1	SxtJ family membrane protein	4.41212	0.183004	0.0556638	-0.32025	-0.186878	-0.0395173	0.0116957	0.540681	0.929242	0.585514	0.99968	0.975472	0.993222
NZ_CP011454.1	4092088	4093566	-	CDS	GEMMAAP_RS17260	WP_053333567.1	hypothetical protein	6.68608	0.531225	0.408472	-0.31948	-0.0613926	-0.0810441	0.0122027	0.0105905	0.0863262	0.385871	0.99968	0.688446	0.988912
NZ_CP011454.1	2431178	2432026	-	CDS	GEMMAAP_RS10310	WP_026849831.1	outer membrane protein assembly factor BamD	8.60572	-0.4508	-0.172548	-0.319466	-0.446266	-0.138138	-0.497359	0.218033	0.737814	0.704153	0.99968	0.703374	0.374705
NZ_CP011454.1	183127	184248	-	CDS	GEMMAAP_RS00815	WP_082820949.1	hypothetical protein	4.83718	0.0421837	0.150129	-0.319399	0.0373226	0.742541	0.0288017	0.912887	0.704337	0.532854	0.99968	0.00133719	0.978354
NZ_CP011454.1	1598345	1599250	+	CDS	GEMMAAP_RS06645	WP_026850337.1	DUF3623 family protein	6.81196	-0.0523037	0.15598	-0.319248	-0.117594	0.259667	-0.0292407	0.879134	0.647996	0.513046	0.99968	0.233057	0.970223
NZ_CP011454.1	3137253	3137816	+	CDS	GEMMAAP_RS13295	WP_053333770.1	TetR/AcrR family transcriptional regulator	5.3865	-0.319165	-0.152012	-0.318669	-0.207348	-0.104547	0.294063	0.129125	0.686516	0.411787	0.99968	0.578217	0.331349
NZ_CP011454.1	2392546	2393538	-	CDS	GEMMAAP_RS10165	WP_026850654.1	radical SAM protein	5.7769	-0.00826243	0.108837	-0.318253	-0.216573	0.279849	-0.25829	0.991996	0.84221	0.645068	0.99968	0.317124	0.657359
NZ_CP011454.1	2747644	2748411	+	CDS	GEMMAAP_RS11705	WP_026849630.1	ATP-binding cassette domain-containing protein	4.2672	0.0396681	0.0286829	-0.317642	-0.147629	0.445641	0.112946	0.920566	0.963333	0.556697	0.99968	0.0461151	0.829649
NZ_CP011454.1	454335	454745	-	CDS	GEMMAAP_RS02000	WP_026849218.1	PIN domain-containing protein	4.9871	0.191253	0.0867693	-0.317085	-0.177656	-0.407643	0.134748	0.412008	0.824562	0.473332	0.99968	0.0268152	0.72303
NZ_CP011454.1	3181711	3182409	-	CDS	GEMMAAP_RS13460	WP_053333762.1	heme exporter protein CcmB	6.04183	-0.441174	-0.350564	-0.316488	-0.335964	-0.264238	0.179906	0.0286227	0.140019	0.399252	0.99968	0.138347	0.607674
NZ_CP011454.1	1530303	1531268	+	CDS	GEMMAAP_RS06320	WP_026850290.1	YihY/virulence factor BrkB family protein	7.42052	-0.326547	-0.252098	-0.315602	-0.204867	-0.226577	-0.422394	0.117403	0.293206	0.410845	0.99968	0.218803	0.151834
NZ_CP011454.1	4677235	4677741	-	CDS	GEMMAAP_RS19715	WP_026848904.1	hypothetical protein	5.70909	-0.269484	-0.196365	-0.314508	-0.104343	-0.565544	-0.170466	0.259132	0.542306	0.518869	0.99968	0.00550917	0.666269
NZ_CP011454.1	3804665	3806278	+	CDS	GEMMAAP_RS16075	WP_082821406.1	alkaline phosphatase family protein	7.15436	-0.430807	-0.364897	-0.313725	-0.271104	-0.386713	-0.403307	0.0825769	0.196319	0.546297	0.99968	0.0740931	0.270917
NZ_CP011454.1	18169	18513	-	CDS	GEMMAAP_RS00085	WP_026848942.1	helix-turn-helix transcriptional regulator	2.86739	-0.253067	0.128129	-0.31241	-0.304083	0.111738	0.0194375	0.720782	0.925004	0.868699	0.99968	0.813129	0.993659
NZ_CP011454.1	2396766	2399729	-	CDS	GEMMAAP_RS10180	WP_026850652.1	LPS-assembly protein LptD	7.86595	-0.182583	-0.118747	-0.312306	-0.243616	0.385582	-0.215512	0.460191	0.717675	0.49428	0.99968	0.0602911	0.594511
NZ_CP011454.1	3772518	3774551	+	CDS	GEMMAAP_RS15950	WP_026848414.1	VWA domain-containing protein	6.23087	-0.412781	-0.340385	-0.31179	-0.404271	0.355315	-0.349937	0.133107	0.304118	0.600148	0.99968	0.138347	0.424308
NZ_CP011454.1	4695024	4696430	-	CDS	GEMMAAP_RS19795	WP_026848916.1	insulinase family protein	6.9932	0.0577378	0.0321937	-0.311363	-0.153296	0.0276964	0.144532	0.773468	0.922951	0.243976	0.99968	0.86957	0.595002
NZ_CP011454.1	254900	255517	-	CDS	GEMMAAP_RS01095	WP_026849082.1	bifunctional phosphoribosyl-AMP cyclohydrolase/phosphoribosyl-ATP diphosphatase HisIE	6.16431	0.429457	0.182562	-0.311224	-0.118933	0.713878	0.363683	0.0953032	0.603928	0.555445	0.99968	0.00295903	0.374705
NZ_CP011454.1	3584130	3585212	+	CDS	GEMMAAP_RS15165	WP_043579427.1	tRNA epoxyqueuosine(34) reductase QueG	6.1895	0.393963	0.703102	-0.310968	-0.24242	0.102205	0.117135	0.0245178	0.00483049	0.300345	0.99968	0.518333	0.698576
NZ_CP011454.1	3223055	3223768	+	CDS	GEMMAAP_RS13650	WP_026848748.1	hypothetical protein	8.13904	0.0691506	-0.130728	-0.310863	-0.115463	-0.189766	0.137086	0.842935	0.729706	0.57102	0.99968	0.435633	0.777779
NZ_CP011454.1	1616017	1620135	+	CDS	GEMMAAP_RS06715	WP_082821119.1	HAMP domain-containing protein	7.53277	-0.556887	-0.169138	-0.310717	-0.3267	-0.0281548	-0.177719	0.0245662	0.597099	0.534659	0.99968	0.916954	0.682891
NZ_CP011454.1	20043	20612	-	CDS	GEMMAAP_RS00100	WP_082820931.1	Uma2 family endonuclease	6.12132	-0.410105	-0.586503	-0.310496	-0.154945	-0.541798	0.228334	0.0336171	0.0180062	0.390177	0.99968	0.00200986	0.442704
NZ_CP011454.1	3436055	3436867	-	CDS	GEMMAAP_RS14555	WP_075071537.1	SDR family oxidoreductase	6.13182	-0.261493	-0.331035	-0.310046	-0.190873	-0.445348	-0.229386	0.185537	0.156519	0.410845	0.99968	0.00977553	0.4622
NZ_CP011454.1	3868371	3869513	+	CDS	GEMMAAP_RS16380	WP_026848345.1	ketoacyl-ACP synthase III	5.98542	-0.775173	-0.41683	-0.309133	-0.13166	-0.122483	0.112194	0.00138611	0.126401	0.494565	0.99968	0.547606	0.7802
NZ_CP011454.1	1559532	1560443	-	CDS	GEMMAAP_RS06475	WP_043581450.1	chlorophyll synthase ChlG	7.4395	-0.240292	-0.0711476	-0.308336	-0.18867	0.243106	0.0455146	0.205771	0.808239	0.345993	0.99968	0.142962	0.916712
NZ_CP011454.1	4497431	4498045	-	CDS	GEMMAAP_RS18950	WP_158514932.1	hypothetical protein	3.72332	-0.0263751	0.326793	-0.308017	-0.200104	-0.0814081	-0.105751	0.951778	0.344791	0.576739	0.99968	0.74178	0.829921
NZ_CP011454.1	2358362	2358841	-	CDS	GEMMAAP_RS10025	WP_043581632.1	LEA type 2 family protein	6.4522	-0.835397	-0.78802	-0.30787	-0.295411	-0.369862	-0.69399	0.0052132	0.0255381	0.631855	0.99968	0.140386	0.0737644
NZ_CP011454.1	143383	144483	+	CDS	GEMMAAP_RS00630	WP_026849016.1	PLP-dependent aminotransferase family protein	5.26269	0.21035	0.305882	-0.307825	0.0925766	0.333522	0.220773	0.389428	0.299546	0.512383	0.99968	0.0784871	0.549184
NZ_CP011454.1	2625654	2626583	-	CDS	GEMMAAP_RS11205	WP_158514828.1	PHB depolymerase family esterase	3.53848	-0.357301	-0.38776	-0.307763	-0.187111	0.529857	0.0911752	0.281492	0.372785	0.711184	0.99968	0.0605427	0.909613
NZ_CP011454.1	4162530	4163039	+	CDS	GEMMAAP_RS20680	WP_026848183.1	CIA30 family protein	4.46692	-0.227212	-0.0682605	-0.3073	-0.157451	-0.165641	-0.217609	0.421349	0.905249	0.59311	0.99968	0.478132	0.633332
NZ_CP011454.1	2777819	2778973	+	CDS	GEMMAAP_RS11805	WP_026849615.1	carboxypeptidase regulatory-like domain-containing protein	6.95351	-0.549315	-0.599925	-0.306782	-0.232736	-0.570104	-0.658473	0.0197979	0.0310433	0.513046	0.99968	0.00661179	0.0348783
NZ_CP011454.1	2933788	2934378	+	CDS	GEMMAAP_RS12440	WP_026849521.1	hypothetical protein	8.61366	-0.721445	-0.762896	-0.306444	-0.437912	0.229621	-0.132194	0.0972516	0.111609	0.789833	0.99968	0.571421	0.886355
NZ_CP011454.1	2069479	2070015	+	CDS	GEMMAAP_RS08630	WP_158514789.1	hypothetical protein	6.70582	-0.474618	-0.115659	-0.305431	-0.328086	-0.0481779	-0.0247355	0.055057	0.759102	0.550896	0.99968	0.85653	0.978354
NZ_CP011454.1	1542282	1542806	+	CDS	GEMMAAP_RS06395	WP_026850300.1	hypothetical protein	7.34022	-0.907295	-0.693429	-0.304908	-0.433225	0.00803296	-0.463518	0.00814411	0.0682325	0.690193	0.99968	0.983004	0.365184
NZ_CP011454.1	2472287	2473579	-	CDS	GEMMAAP_RS10540	WP_053334175.1	cation:dicarboxylase symporter family transporter	6.77802	-0.204059	0.0151569	-0.304838	-0.0123413	-0.178362	-0.363157	0.395985	0.976021	0.511858	0.99968	0.392446	0.286709
NZ_CP011454.1	2589965	2590744	-	CDS	GEMMAAP_RS11005	WP_026849731.1	beta-ketoacyl-ACP reductase	4.07505	-0.30412	-0.1448	-0.304553	-0.246302	-0.456116	-0.0037554	0.258523	0.739484	0.600148	0.99968	0.0402979	0.998029
NZ_CP011454.1	1524495	1525625	+	CDS	GEMMAAP_RS06290	WP_026850286.1	transaldolase	6.88116	-0.021715	-0.237929	-0.304524	-0.0153192	-0.174283	-0.0777526	0.952174	0.3874	0.512383	0.99968	0.392119	0.867406
NZ_CP011454.1	3259708	3260355	+	CDS	GEMMAAP_RS13795	WP_026848724.1	gluconate 2-dehydrogenase subunit 3 family protein	4.81551	0.352232	0.395207	-0.304413	-0.0949178	-0.025961	-0.0924657	0.0825536	0.111329	0.410211	0.99968	0.895137	0.811402
NZ_CP011454.1	2170274	2170900	-	CDS	GEMMAAP_RS09110	WP_053334531.1	NADH-quinone oxidoreductase subunit B	6.70845	0.373001	0.413061	-0.304252	-0.0343667	-0.250252	-0.00884578	0.0265572	0.0392845	0.294594	0.99968	0.0790835	0.990898
NZ_CP011454.1	4169431	4169682	-	CDS	GEMMAAP_RS17565	WP_026848176.1	DUF2007 domain-containing protein	3.7745	0.354338	0.206117	-0.303714	-0.135285	0.220181	0.0578572	0.248074	0.65978	0.643294	0.99968	0.387649	0.935404
NZ_CP011454.1	858148	858462	-	CDS	GEMMAAP_RS20480	WP_158514719.1	IS3 family transposase	0.464775	-0.533792	-0.213492	-0.303469	0.601242	-0.792828	-0.231179	0.602862	0.924428	0.9428	0.99968	0.231873	0.889424
NZ_CP011454.1	3026282	3029440	-	CDS	GEMMAAP_RS12820	WP_202969131.1	hypothetical protein	5.91089	0.0937882	0.151466	-0.303452	-0.103887	0.531278	-0.00345438	0.725228	0.603928	0.477101	0.99968	0.00393118	0.997053
NZ_CP011454.1	4429468	4430052	+	CDS	GEMMAAP_RS18655	WP_053334590.1	rhomboid family intramembrane serine protease	4.99041	-0.247427	-0.0613454	-0.303148	-0.242294	-0.587533	0.249417	0.499459	0.937271	0.723505	0.99968	0.031937	0.647225
NZ_CP011454.1	115030	115284	+	CDS	GEMMAAP_RS00480	WP_158514669.1	helix-turn-helix domain-containing protein	5.69679	-0.211613	-0.0734137	-0.30305	-0.254163	-0.688203	0.267442	0.523233	0.906373	0.672897	0.99968	0.00963469	0.595002
NZ_CP011454.1	150536	151003	+	CDS	GEMMAAP_RS00670	WP_043580087.1	AAC(3)-I family aminoglycoside N-acetyltransferase	5.86914	-0.912331	-0.856412	-0.302824	-0.409716	0.182818	-0.0900292	0.00662531	0.0383164	0.68993	0.99968	0.528602	0.898964
NZ_CP011454.1	4069329	4069865	-	CDS	GEMMAAP_RS17160	WP_043579341.1	DinB family protein	5.77261	-0.343264	-0.017136	-0.300997	-0.0659372	-0.213693	0.144055	0.0845357	0.970081	0.412279	0.99968	0.206917	0.669267
NZ_CP011454.1	4230103	4230828	-	CDS	GEMMAAP_RS17840	WP_026848134.1	hypothetical protein	5.02306	0.0685606	0.0337268	-0.300983	0.0381294	0.154694	0.059307	0.825991	0.996048	0.548935	0.99968	0.472127	0.914536
NZ_CP011454.1	1160134	1162125	+	CDS	GEMMAAP_RS04785	WP_053334253.1	ATP-binding protein	7.57632	-0.809576	-0.597513	-0.300444	-0.300536	-0.30525	-0.372173	0.0125557	0.0949399	0.68423	0.99968	0.283281	0.471608
NZ_CP011454.1	2762123	2763091	+	CDS	GEMMAAP_RS11755	WP_026849624.1	hypothetical protein	4.27944	-0.148331	-0.464752	-0.299913	0.0446226	-0.0451158	-0.45285	0.594121	0.145774	0.576739	0.99968	0.856193	0.192817
NZ_CP011454.1	1635650	1637257	+	CDS	GEMMAAP_RS06785	WP_053334450.1	YifB family Mg chelatase-like AAA ATPase	3.36851	0.393965	0.212833	-0.299288	0.143073	-0.0478593	-0.199339	0.235917	0.690844	0.690193	0.99968	0.894068	0.72303
NZ_CP011454.1	2064931	2065758	+	CDS	GEMMAAP_RS08595	WP_026850633.1	glutamate racemase	5.92818	-0.347201	0.00384575	-0.299273	-0.355247	0.553443	-0.333961	0.208311	0.996159	0.630711	0.99968	0.0233401	0.479034
NZ_CP011454.1	473473	474030	+	CDS	GEMMAAP_RS02055	WP_026849225.1	cytochrome c	2.17048	-0.0147581	0.0869578	-0.298981	-0.308321	0.601556	-0.00453288	0.988442	0.932631	0.798569	0.99968	0.0311349	0.998268
NZ_CP011454.1	4238413	4238841	-	CDS	GEMMAAP_RS17875	WP_026848128.1	CBS domain-containing protein	4.93332	-0.497241	-0.445884	-0.298816	-0.0849856	-0.604368	-0.10843	0.0599809	0.172383	0.62591	0.99968	0.00736193	0.823384
NZ_CP011454.1	505453	507594	+	CDS	GEMMAAP_RS02200	WP_026849243.1	hypothetical protein	6.6804	-0.277495	0.0094506	-0.298702	-0.377622	0.0664446	-0.207607	0.170962	0.983948	0.434052	0.99968	0.742943	0.536263
NZ_CP011454.1	4261157	4261984	-	CDS	GEMMAAP_RS17960	WP_043579304.1	hypothetical protein	3.46721	-0.295804	-0.21044	-0.298674	-0.534802	-0.241204	0.0921426	0.289393	0.613431	0.61806	0.99968	0.291523	0.865198
NZ_CP011454.1	3221199	3221768	+	CDS	GEMMAAP_RS13635	WP_145979141.1	DUF2628 domain-containing protein	9.24398	0.583695	0.552608	-0.298269	-0.48883	0.456946	0.251898	0.369715	0.460602	0.873242	0.99968	0.426238	0.835671
NZ_CP011454.1	2391253	2392530	-	CDS	GEMMAAP_RS10160	WP_053334469.1	imidazolonepropionase	6.60485	-0.0562655	-0.166244	-0.297585	-0.0311433	0.174341	-0.174404	0.83312	0.530038	0.450959	0.99968	0.347831	0.638756
NZ_CP011454.1	3307337	3308653	+	CDS	GEMMAAP_RS14030	WP_026848689.1	hypothetical protein	7.16396	-2.40253	-1.78739	-0.29756	-0.436866	-2.27448	-1.1992	0.000149094	0.00712892	0.819105	0.99968	2.41198e-05	0.0562648
NZ_CP011454.1	2806103	2806873	+	CDS	GEMMAAP_RS11915	WP_026849597.1	carbonic anhydrase	5.44357	0.0189122	0.0495934	-0.29703	-0.0307036	0.399274	-0.0172972	0.951778	0.899612	0.412601	0.99968	0.0140132	0.980408
NZ_CP011454.1	1849786	1850355	-	CDS	GEMMAAP_RS07650	WP_202969218.1	hypothetical protein	5.06876	0.160171	0.275419	-0.296775	-0.118725	0.393083	-0.0633618	0.464986	0.288497	0.45275	0.99968	0.0190161	0.877019
NZ_CP011454.1	3808655	3809599	+	CDS	GEMMAAP_RS16095	WP_026848390.1	alpha/beta hydrolase	4.34146	0.122775	-0.0382116	-0.296711	-0.372646	0.0590474	-0.00779351	0.734299	0.97766	0.598869	0.99968	0.823325	0.994981
NZ_CP011454.1	153290	153904	+	CDS	GEMMAAP_RS20445	WP_053333878.1	TetR/AcrR family transcriptional regulator	4.54133	-0.23246	-0.0332356	-0.296538	-0.371727	-0.514334	-0.0183628	0.368492	0.954961	0.573608	0.99968	0.0141096	0.984799
NZ_CP011454.1	3389680	3391221	-	CDS	GEMMAAP_RS14370	WP_043579457.1	PAS domain S-box protein	5.951	-0.960792	-0.59499	-0.296519	-0.563857	0.0806467	-0.0525285	0.000241082	0.0303196	0.511858	0.99968	0.71905	0.922842
NZ_CP011454.1	2755891	2757819	-	CDS	GEMMAAP_RS11740	WP_043580683.1	ankyrin repeat domain-containing protein	6.22045	-0.318783	-0.0188373	-0.29631	-0.110418	0.571571	-0.207433	0.134824	0.968768	0.489758	0.99968	0.00306603	0.574301
NZ_CP011454.1	3529071	3529487	+	CDS	GEMMAAP_RS14895	WP_043579436.1	HNH endonuclease	8.70461	-0.62664	-0.041126	-0.295545	-0.217542	0.122519	0.019345	0.0279524	0.941913	0.630711	0.99968	0.661612	0.988043
NZ_CP011454.1	2986488	2988845	+	CDS	GEMMAAP_RS12665	WP_053334059.1	prolyl oligopeptidase family serine peptidase	5.53476	-0.0250123	0.0610654	-0.295136	-0.068486	-0.0816659	-0.175662	0.928856	0.851198	0.368999	0.99968	0.630563	0.562684
NZ_CP011454.1	1880861	1881574	+	CDS	GEMMAAP_RS07785	WP_053334405.1	GTPase domain-containing protein	6.09708	0.288901	0.056867	-0.294812	-0.225526	0.356609	0.318459	0.171908	0.89026	0.491932	0.99968	0.0544531	0.330912
NZ_CP011454.1	4612806	4613402	+	CDS	GEMMAAP_RS19405	WP_026848855.1	hypothetical protein	4.88999	-0.0263401	0.0334322	-0.29389	0.312879	-0.126467	-0.14571	0.951778	0.957088	0.635769	0.99968	0.604626	0.760858
NZ_CP011454.1	1395427	1396743	-	CDS	GEMMAAP_RS05800	WP_026849859.1	amino acid permease	3.68809	-0.609502	-0.399996	-0.292403	-0.0661188	-0.144094	-0.0623418	0.0572462	0.349873	0.706273	0.99968	0.616541	0.935404
NZ_CP011454.1	2403410	2404171	-	CDS	GEMMAAP_RS10205	WP_043581625.1	TonB C-terminal domain-containing protein	6.9954	-0.389395	-0.292849	-0.292202	-0.296757	0.0187279	-0.182825	0.0226183	0.127454	0.323512	0.99968	0.91936	0.514317
NZ_CP011454.1	501078	501956	-	CDS	GEMMAAP_RS02180	WP_026849241.1	hypothetical protein	7.95529	-0.564416	-0.500476	-0.292195	-0.336546	-0.124827	-0.409428	0.0151217	0.0540392	0.515846	0.99968	0.565351	0.216891
NZ_CP011454.1	2091892	2094378	+	CDS	GEMMAAP_RS08740	WP_026850855.1	outer membrane protein assembly factor BamA	10.1802	-0.842026	-0.814725	-0.291714	-0.468726	0.322726	-0.504162	0.00901634	0.0232476	0.677645	0.99968	0.252526	0.281296
NZ_CP011454.1	1734357	1735268	+	CDS	GEMMAAP_RS07195	WP_026850424.1	cyanophycinase	5.42796	-0.120792	0.107902	-0.291502	-0.0212368	-0.19716	0.219036	0.589944	0.770134	0.472238	0.99968	0.240736	0.473346
NZ_CP011454.1	859571	860395	+	CDS	GEMMAAP_RS03640	WP_026850202.1	IS21-like element helper ATPase IstB	2.79734	1.01526	0.630988	-0.291213	-0.25694	0.088941	0.280496	0.0189053	0.276231	0.785961	0.99968	0.820489	0.678808
NZ_CP011454.1	3862183	3862455	+	CDS	GEMMAAP_RS16355	WP_145979191.1	hypothetical protein	5.56247	-0.297492	-0.402648	-0.291104	-0.22489	-0.168572	0.119708	0.271578	0.223773	0.620236	0.99968	0.4723	0.806751
NZ_CP011454.1	3774568	3778224	+	CDS	GEMMAAP_RS20785	WP_179947315.1	hypothetical protein	7.02639	-0.470768	-0.18815	-0.291079	-0.316984	0.263928	-0.362422	0.0503203	0.539112	0.558547	0.99968	0.21824	0.331349
NZ_CP011454.1	3588114	3591578	-	CDS	GEMMAAP_RS15180	WP_053333675.1	PSD1 and planctomycete cytochrome C domain-containing protein	6.607	0.0459639	0.16092	-0.290653	-0.0368961	0.428624	0.0712206	0.891305	0.534062	0.457676	0.99968	0.0120775	0.85582
NZ_CP011454.1	2977710	2978399	-	CDS	GEMMAAP_RS12625	WP_026849489.1	dienelactone hydrolase family protein	5.18346	0.197919	0.244067	-0.29062	-0.00919668	-0.299578	0.107115	0.340624	0.330275	0.475681	0.99968	0.0856042	0.771957
NZ_CP011454.1	2206374	2207591	-	CDS	GEMMAAP_RS09320	WP_026850773.1	acyl-CoA dehydrogenase family protein	6.0965	-0.718034	-0.584962	-0.290425	0.127321	-0.0107677	-0.00846822	0.00218383	0.0316919	0.528018	0.99968	0.965482	0.994981
NZ_CP011454.1	287736	288878	+	CDS	GEMMAAP_RS01275	WP_026849113.1	Re/Si-specific NAD(P)(+) transhydrogenase subunit alpha	4.87614	0.303749	0.380708	-0.290415	0.32775	0.0998737	-0.0818826	0.274242	0.246864	0.650864	0.99968	0.73328	0.908156
NZ_CP011454.1	3666693	3667034	-	CDS	GEMMAAP_RS15520	WP_043579410.1	hypothetical protein	4.59803	0.348153	1.34233	-0.290391	-0.406496	0.326851	-0.113483	0.535229	0.0372874	0.841571	0.99968	0.590874	0.954878
NZ_CP011454.1	4646557	4647120	+	CDS	GEMMAAP_RS19545	WP_053333824.1	RNA polymerase sigma factor	9.79086	1.70632	0.420915	-0.290338	-0.909761	0.503413	0.0768297	0.011585	0.600415	0.883864	0.99968	0.385773	0.9687
NZ_CP011454.1	2553362	2553784	-	CDS	GEMMAAP_RS10860	WP_043580952.1	type II secretion system major pseudopilin GspG	8.34601	-0.359158	0.462547	-0.289326	-0.303491	-0.910458	0.264912	0.482502	0.413595	0.829634	0.99968	0.0311642	0.759707
NZ_CP011454.1	4272319	4273491	+	CDS	GEMMAAP_RS18015	WP_026848105.1	PQQ-binding-like beta-propeller repeat protein	3.92213	0.352379	0.217893	-0.289095	-0.148914	0.251892	0.393687	0.298825	0.680661	0.711184	0.99968	0.381654	0.443511
NZ_CP011454.1	3001547	3001825	-	CDS	GEMMAAP_RS12735	WP_053334052.1	AtpZ/AtpI family protein	6.03047	-0.472494	-0.334988	-0.28844	-0.385651	-0.663722	0.551624	0.0935098	0.338316	0.650864	0.99968	0.00715245	0.147943
NZ_CP011454.1	122223	122411	+	CDS	GEMMAAP_RS20750	WP_043580081.1	hypothetical protein	4.30497	-0.00326969	-0.0567712	-0.287619	-0.171123	-0.0365633	0.321065	0.996584	0.93511	0.689011	0.99968	0.904214	0.488215
NZ_CP011454.1	3465740	3469327	-	CDS	GEMMAAP_RS14675	WP_026848590.1	ABC transporter permease	5.37082	0.141357	0.0298833	-0.287332	-0.0795948	0.0676152	-0.146363	0.47105	0.94144	0.397479	0.99968	0.697274	0.646991
NZ_CP011454.1	13573	13956	+	CDS	GEMMAAP_RS00060	WP_075071361.1	prepilin-type N-terminal cleavage/methylation domain-containing protein	8.26397	0.405884	0.137224	-0.287029	-0.0786077	-0.41769	0.140426	0.148055	0.729706	0.637932	0.99968	0.0917354	0.791115
NZ_CP011454.1	1048468	1049544	+	CDS	GEMMAAP_RS04370	WP_145978996.1	NAD(P)/FAD-dependent oxidoreductase	4.62374	0.62533	0.125987	-0.286981	-0.158379	0.0503815	0.023822	0.0255271	0.792113	0.651467	0.99968	0.855768	0.980408
NZ_CP011454.1	1850473	1852869	-	CDS	GEMMAAP_RS07655	WP_026850492.1	penicillin acylase family protein	5.88255	0.19679	0.29555	-0.286843	0.0654474	0.483876	0.144032	0.298825	0.183716	0.407785	0.99968	0.00285283	0.647911
NZ_CP011454.1	3229020	3229751	+	CDS	GEMMAAP_RS13675	WP_053333750.1	7-cyano-7-deazaguanine synthase QueC	6.62223	-0.116968	0.173801	-0.286703	-0.17902	-0.369593	0.291441	0.663155	0.580155	0.550896	0.99968	0.0608655	0.395611
NZ_CP011454.1	4385088	4386947	-	CDS	GEMMAAP_RS18485	WP_053334580.1	hypothetical protein	1.5738	-0.348625	-0.205653	-0.286563	-0.510068	-0.340547	-0.43295	0.558383	0.854012	0.865418	0.99968	0.49075	0.672203
NZ_CP011454.1	1333435	1335762	+	CDS	GEMMAAP_RS05580	WP_082821089.1	TonB-dependent receptor	4.37305	-0.320999	-0.0329641	-0.285822	-0.282961	0.20038	-0.200827	0.143971	0.949551	0.540015	0.99968	0.307621	0.624685
NZ_CP011454.1	3972629	3974458	+	CDS	GEMMAAP_RS16770	WP_158514908.1	amidohydrolase family protein	5.77908	-0.519638	-0.205968	-0.285816	-0.254175	-0.457911	-0.759745	0.00784369	0.389299	0.412279	0.99968	0.00640779	0.0018214
NZ_CP011454.1	4006431	4007978	+	CDS	GEMMAAP_RS16905	WP_053333587.1	GMC family oxidoreductase	6.20639	0.288522	0.399187	-0.285638	-0.163445	0.496791	0.0869296	0.761358	0.743422	0.918749	0.99968	0.432257	0.966122
NZ_CP011454.1	805347	806075	+	CDS	GEMMAAP_RS03435	WP_158514713.1	PEP-CTERM sorting domain-containing protein	6.93617	-0.0728847	-0.044168	-0.285538	-9.72881e-05	-0.370213	-0.102923	0.83312	0.937015	0.643332	0.999765	0.0986622	0.837761
NZ_CP011454.1	487952	490069	-	CDS	GEMMAAP_RS02115	WP_053333961.1	prolyl oligopeptidase family serine peptidase	4.92046	-0.0568481	-0.311455	-0.284655	-0.0603688	0.100181	-0.140672	0.857242	0.315483	0.560456	0.99968	0.638024	0.726775
NZ_CP011454.1	4297293	4297643	+	CDS	GEMMAAP_RS18105	WP_026848092.1	ArsC family reductase	3.83519	-0.572671	-0.780339	-0.284495	-0.250102	-0.950428	-0.124407	0.0285483	0.0324215	0.643332	0.99968	0.000114824	0.779784
NZ_CP011454.1	72107	73789	+	CDS	GEMMAAP_RS00310	WP_026848975.1	amidohydrolase	5.11013	0.096306	0.0369672	-0.284233	-0.157575	0.0228572	0.25779	0.794169	0.956667	0.665748	0.99968	0.940171	0.586817
NZ_CP011454.1	1641018	1642388	+	CDS	GEMMAAP_RS06805	WP_026850361.1	sigma-54 dependent transcriptional regulator	7.01632	-0.549921	-0.338502	-0.284147	-0.369127	-0.215098	-0.521459	0.0153225	0.183525	0.547505	0.99968	0.284294	0.0913594
NZ_CP011454.1	2613507	2613728	-	CDS	GEMMAAP_RS11145	WP_026849713.1	translation initiation factor IF-1	4.48686	-0.40243	-0.2944	-0.28378	-0.332592	-0.525327	0.167882	0.214868	0.519409	0.719077	0.99968	0.0629168	0.776574
NZ_CP011454.1	1536085	1536387	+	CDS	GEMMAAP_RS06355	WP_026850295.1	hypothetical protein	6.46238	-0.199784	-0.42173	-0.283699	-0.291557	-0.0847745	-0.198593	0.385459	0.104523	0.539565	0.99968	0.694781	0.598128
NZ_CP011454.1	2755108	2755527	-	CDS	GEMMAAP_RS11730	WP_053334107.1	RidA family protein	3.95536	0.00172922	0.00384874	-0.283445	-0.0537171	0.32952	-0.00513709	0.998311	0.996159	0.650864	0.99968	0.166582	0.996981
NZ_CP011454.1	2448353	2449588	-	CDS	GEMMAAP_RS10400	WP_053334182.1	N-acetylmuramoyl-L-alanine amidase	8.23063	-0.321725	0.0607616	-0.283428	-0.28982	-0.291643	-0.0217221	0.120022	0.862477	0.477101	0.99968	0.111115	0.977423
NZ_CP011454.1	2420372	2421130	-	CDS	GEMMAAP_RS10280	WP_145979089.1	hypothetical protein	9.93777	-0.579831	-0.620686	-0.282596	-0.244184	0.048577	-0.337722	0.0443715	0.0515307	0.648653	0.99968	0.872848	0.470719
NZ_CP011454.1	154105	154275	+	CDS	GEMMAAP_RS20190	WP_158514674.1	hypothetical protein	7.165	0.0102996	1.8222	-0.282491	-0.0181539	0.505429	0.245617	0.996874	0.148502	0.953238	0.99968	0.572031	0.910232
NZ_CP011454.1	185613	188537	-	CDS	GEMMAAP_RS00825	WP_053333893.1	DUF2309 domain-containing protein	6.35294	0.481009	0.526615	-0.282177	0.0247951	0.560997	0.330726	0.0334815	0.0513389	0.548935	0.99968	0.00538996	0.333087
NZ_CP011454.1	1961262	1962188	+	CDS	GEMMAAP_RS08125	WP_026850564.1	helical backbone metal receptor	6.02145	0.0592718	0.0894324	-0.28215	-0.232726	0.365752	0.141287	0.815439	0.772317	0.465025	0.99968	0.0331144	0.691648
NZ_CP011454.1	327034	328551	-	CDS	GEMMAAP_RS01455	WP_026849141.1	PAS domain-containing protein	7.26687	0.73	0.71039	-0.282022	0.0475461	0.482291	0.35616	0.000508558	0.00483049	0.410845	0.99968	0.00430419	0.179617
NZ_CP011454.1	4684392	4685252	-	CDS	GEMMAAP_RS19745	WP_026848909.1	glutaminyl-peptide cyclotransferase	6.44639	-0.487243	-0.340604	-0.281845	-0.331069	-0.402448	-0.0258821	0.00993061	0.118475	0.422737	0.99968	0.0131815	0.959886
NZ_CP011454.1	4321941	4322642	-	CDS	GEMMAAP_RS18215	WP_053334564.1	DUF4386 family protein	3.08358	-1.14118	-0.736412	-0.281382	-0.605785	-0.645496	-0.324831	0.00963182	0.181134	0.813224	0.99968	0.0560991	0.643738
NZ_CP011454.1	3205873	3207015	+	CDS	GEMMAAP_RS13565	WP_026848760.1	patatin-like phospholipase family protein	6.03296	0.0388917	0.171535	-0.281255	-0.0501819	-0.243602	0.0803146	0.887704	0.502463	0.451647	0.99968	0.144351	0.827153
NZ_CP011454.1	4211201	4214017	+	CDS	GEMMAAP_RS17755	WP_158514917.1	carboxypeptidase-like regulatory domain-containing protein	5.09779	-0.154746	-0.119461	-0.281192	-0.234385	0.505196	0.331469	0.693605	0.848498	0.723486	0.99968	0.068199	0.535462
NZ_CP011454.1	2587304	2588212	-	CDS	GEMMAAP_RS10990	WP_053334144.1	cation diffusion facilitator family transporter	6.06181	-0.636996	-0.621453	-0.280366	-0.0772235	-0.572393	-0.085998	0.00760083	0.0350296	0.573608	0.99968	0.00473779	0.845705
NZ_CP011454.1	4426756	4427961	+	CDS	GEMMAAP_RS18645	WP_026850934.1	FAD-binding oxidoreductase	4.71557	-0.0164649	0.0824848	-0.280063	-0.0291251	-0.106392	0.151179	0.965824	0.917642	0.558547	0.99968	0.609226	0.701811
NZ_CP011454.1	4518307	4518804	-	CDS	GEMMAAP_RS19015	WP_026850988.1	GNAT family N-acetyltransferase	4.92292	0.180418	0.0594359	-0.279679	-0.111081	-0.0413846	0.122398	0.465795	0.899612	0.560456	0.99968	0.863877	0.771957
NZ_CP011454.1	3622818	3624092	-	CDS	GEMMAAP_RS15315	WP_202969150.1	PQQ-dependent sugar dehydrogenase	7.07286	-0.732587	-0.545523	-0.278937	-0.451542	-0.648581	-1.0512	0.0509026	0.199507	0.780174	0.99968	0.0479183	0.040701
NZ_CP011454.1	2552718	2553206	-	CDS	GEMMAAP_RS10855	WP_026849751.1	Rrf2 family transcriptional regulator	7.89862	-2.81923	-2.02554	-0.278884	-0.561575	-2.62853	-1.0854	0.0011411	0.0247104	0.908648	0.99968	0.00056737	0.319233
NZ_CP011454.1	1703591	1704472	-	CDS	GEMMAAP_RS07070	WP_026850401.1	hypothetical protein	4.43775	-0.0863441	-0.0511942	-0.277413	-0.105632	-0.465631	0.111898	0.788402	0.931446	0.633301	0.99968	0.0246971	0.804736
NZ_CP011454.1	1357775	1366138	-	CDS	GEMMAAP_RS05665	WP_053334215.1	hypothetical protein	5.69171	0.0925407	0.087618	-0.277375	-0.221813	0.0334968	-0.0391156	0.720782	0.808957	0.528018	0.99968	0.872933	0.938961
NZ_CP011454.1	3238737	3240230	+	CDS	GEMMAAP_RS13720	WP_053333748.1	serine/threonine protein kinase	8.46177	-0.332816	-0.289419	-0.277191	-0.133282	0.0326801	0.044958	0.0466722	0.115604	0.326719	0.99968	0.85653	0.908156
NZ_CP011454.1	419298	419819	+	CDS	GEMMAAP_RS01870	WP_158514689.1	hypothetical protein	4.67354	-0.0789669	-0.139268	-0.276344	-0.074563	-0.0460802	-0.0202392	0.764659	0.678403	0.534659	0.99968	0.832045	0.98831
NZ_CP011454.1	385285	386730	-	CDS	GEMMAAP_RS01710	WP_202969178.1	sodium:solute symporter	5.66342	0.412619	0.204646	-0.276121	-0.189379	-0.120404	0.115444	0.0571459	0.480417	0.539565	0.99968	0.528877	0.759707
NZ_CP011454.1	1382736	1383293	+	CDS	GEMMAAP_RS05740	WP_026849869.1	sigma-70 family RNA polymerase sigma factor	3.63608	0.620221	0.582355	-0.275724	0.0673558	-0.115855	-0.0167383	0.0368676	0.122925	0.689011	0.99968	0.642947	0.996981
NZ_CP011454.1	2010106	2011848	+	CDS	GEMMAAP_RS08345	WP_158514783.1	VWA domain-containing protein	7.06489	-0.432951	-0.256384	-0.27556	-0.395876	-0.0155561	-0.409108	0.0769183	0.37412	0.598869	0.99968	0.955423	0.268787
NZ_CP011454.1	3439689	3440609	+	CDS	GEMMAAP_RS14575	WP_026848604.1	universal stress protein	6.88472	-0.908689	-0.635327	-0.275349	0.0170499	-1.89781	-0.823986	0.000965213	0.0383923	0.629481	0.99968	1.75057e-08	0.013874
NZ_CP011454.1	2007979	2009049	+	CDS	GEMMAAP_RS08335	WP_026850595.1	hypothetical protein	6.73441	-0.251987	-0.27498	-0.275183	-0.277287	-0.208062	-0.172022	0.134082	0.152887	0.365873	0.99968	0.158817	0.537339
NZ_CP011454.1	2393549	2395210	-	CDS	GEMMAAP_RS10170	WP_026850653.1	urocanate hydratase	6.92494	-0.335427	0.0336748	-0.275076	-0.189582	0.198072	-0.369719	0.133107	0.94144	0.547505	0.99968	0.326125	0.275558
NZ_CP011454.1	513205	515004	-	CDS	GEMMAAP_RS02235	WP_043580159.1	hypothetical protein	7.2777	-0.471367	-0.259407	-0.273764	-0.373599	0.297088	-0.156677	0.0316456	0.307826	0.540015	0.99968	0.124539	0.691648
NZ_CP011454.1	2022534	2023094	-	CDS	GEMMAAP_RS08390	WP_145979062.1	hypothetical protein	1.44465	-0.328244	-0.863186	-0.273442	-0.205109	0.177204	0.071339	0.479352	0.183716	0.849438	0.99968	0.700135	0.967237
NZ_CP011454.1	1594027	1595304	-	CDS	GEMMAAP_RS06630	WP_202969202.1	hypothetical protein	7.74207	-0.0275035	-0.0816843	-0.273307	-0.0570916	0.35665	0.208392	0.928299	0.779314	0.477177	0.99968	0.036796	0.51792
NZ_CP011454.1	3225572	3227344	-	CDS	GEMMAAP_RS13660	WP_026848746.1	hypothetical protein	8.81317	-1.13012	-0.98146	-0.273251	-0.296229	-0.547965	-0.69691	0.000703911	0.00861974	0.68993	0.99968	0.0392309	0.0908523
NZ_CP011454.1	76731	77714	-	CDS	GEMMAAP_RS00325	WP_158514666.1	cytochrome P450	4.28667	-0.530251	-0.24464	-0.273149	0.170865	-0.406703	-0.232579	0.0443675	0.511001	0.650864	0.99968	0.0519453	0.574301
NZ_CP011454.1	4138862	4141744	-	CDS	GEMMAAP_RS17450	WP_145979216.1	CHAT domain-containing protein	6.12297	0.17321	0.431414	-0.272619	-0.0429133	0.213977	0.356221	0.518817	0.139922	0.603749	0.99968	0.30813	0.316029
NZ_CP011454.1	2356961	2358262	-	CDS	GEMMAAP_RS10020	WP_075071481.1	GTPase HflX	7.86302	-0.591914	-0.348437	-0.272595	-0.323204	-0.391625	-0.787921	0.035842	0.276231	0.665748	0.99968	0.117327	0.0399194
NZ_CP011454.1	3979759	3980361	+	CDS	GEMMAAP_RS16795	WP_026848285.1	TetR/AcrR family transcriptional regulator	3.89152	-0.277133	-0.332197	-0.272566	-0.104628	-0.537236	-0.0992714	0.325131	0.389426	0.651467	0.99968	0.010372	0.829172
NZ_CP011454.1	2699128	2699994	-	CDS	GEMMAAP_RS11500	WP_026849660.1	MOSC domain-containing protein	5.14172	0.280303	0.141451	-0.27234	-0.134865	0.067304	0.0345343	0.243673	0.704326	0.58879	0.99968	0.769356	0.955293
NZ_CP011454.1	1752238	1753293	+	CDS	GEMMAAP_RS07270	WP_145979041.1	hypothetical protein	9.21098	-0.649454	-0.420031	-0.27192	-0.28573	-0.000378246	-0.284607	0.00333817	0.0693872	0.500484	0.99968	0.998793	0.374705
NZ_CP011454.1	156955	157449	-	CDS	GEMMAAP_RS00705	WP_158514675.1	type II toxin-antitoxin system VapC family toxin	5.29597	0.0845251	0.00651797	-0.27141	-0.35557	-0.530158	0.182926	0.794095	0.992551	0.631776	0.99968	0.0122154	0.659863
NZ_CP011454.1	594792	595235	-	CDS	GEMMAAP_RS02645	WP_026849316.1	SufE family protein	5.36192	-0.332123	0.0253488	-0.271398	-0.0536896	-0.458374	0.155407	0.197902	0.964877	0.643332	0.99968	0.0299921	0.721543
NZ_CP011454.1	4653989	4655077	-	CDS	GEMMAAP_RS19585	WP_026848882.1	23S rRNA (adenine(2503)-C(2))-methyltransferase RlmN	5.68033	-0.0619067	0.0451105	-0.270787	-0.173178	-0.436343	-0.188156	0.90643	0.936041	0.481241	0.99968	0.00699128	0.527782
NZ_CP011454.1	2815985	2816833	+	CDS	GEMMAAP_RS11955	WP_082821271.1	M48 family metallopeptidase	6.78206	-0.83144	-0.640282	-0.270436	-0.367339	-0.40048	-0.491122	0.00760083	0.0716743	0.709847	0.99968	0.129972	0.275558
NZ_CP011454.1	1504920	1505648	-	CDS	GEMMAAP_RS06195	WP_053334323.1	DUF1080 domain-containing protein	4.78541	-0.261617	-0.372316	-0.270186	-0.00179227	0.0329646	-0.151804	0.270624	0.205123	0.603418	0.99968	0.888684	0.715426
NZ_CP011454.1	212529	213899	-	CDS	GEMMAAP_RS00925	WP_026849057.1	M28 family metallopeptidase	4.50828	0.188642	0.333225	-0.269633	-0.102661	-0.115495	0.0989045	0.560208	0.387229	0.701436	0.99968	0.65538	0.856916
NZ_CP011454.1	3866730	3867338	-	CDS	GEMMAAP_RS16370	WP_026848347.1	PH domain-containing protein	6.63272	-0.207719	-0.0961061	-0.268721	-0.185699	-0.326835	-0.0645736	0.340734	0.770164	0.534659	0.99968	0.0687674	0.883891
NZ_CP011454.1	840177	843875	-	CDS	GEMMAAP_RS03560	WP_026850214.1	methionine synthase	8.8056	-0.187716	0.0555971	-0.268608	-0.110625	-0.280418	0.0291701	0.408603	0.881534	0.534659	0.99968	0.143888	0.963271
NZ_CP011454.1	2843464	2844051	-	CDS	GEMMAAP_RS12055	WP_026849576.1	porin family protein	6.22225	-0.464759	-0.710971	-0.268395	-0.142161	-0.687315	-1.05086	0.311849	0.181012	0.838887	0.99968	0.0894821	0.120606
NZ_CP011454.1	4322702	4323292	-	CDS	GEMMAAP_RS18220	WP_053334565.1	cupin domain-containing protein	2.5584	-0.890875	0.0567112	-0.26833	-0.687105	-0.585984	0.423916	0.134448	0.966887	0.875159	0.99968	0.164251	0.595002
NZ_CP011454.1	1178497	1178814	+	CDS	GEMMAAP_RS04865	WP_043581059.1	YtxH domain-containing protein	9.6473	-1.19083	-0.385961	-0.267995	-0.488187	-0.54489	-0.775223	0.00696288	0.42974	0.812573	0.99968	0.144191	0.202279
NZ_CP011454.1	3413647	3414330	-	CDS	GEMMAAP_RS14475	WP_026848621.1	DUF4412 domain-containing protein	8.90236	-0.940744	-0.466584	-0.267785	-0.280315	-0.321968	-0.576543	0.0218679	0.297952	0.799807	0.99968	0.382179	0.346075
NZ_CP011454.1	3069053	3069469	+	CDS	GEMMAAP_RS13005	WP_202969133.1	RNA-binding protein	4.65878	0.070981	0.00110065	-0.267553	-0.334802	-0.173266	0.219997	0.856371	0.998292	0.691681	0.99968	0.492258	0.646991
NZ_CP011454.1	4495673	4496857	+	CDS	GEMMAAP_RS18940	WP_043581776.1	serine hydrolase	5.30146	0.201031	0.102882	-0.267275	-0.0713009	-0.0782141	0.0780315	0.370666	0.772317	0.558547	0.99968	0.693008	0.880304
NZ_CP011454.1	468401	471022	+	CDS	GEMMAAP_RS02040	WP_075071388.1	serine/threonine-protein kinase	5.90636	0.108321	0.351083	-0.26717	-0.0995746	0.475366	0.234398	0.599955	0.104523	0.427788	0.99968	0.00309238	0.388313
NZ_CP011454.1	1563145	1563708	+	CDS	GEMMAAP_RS06490	WP_082821112.1	2-vinyl bacteriochlorophyllide hydratase	7.07348	-0.237375	-0.43626	-0.266891	0.155902	-0.0846373	0.201817	0.416349	0.163427	0.681227	0.99968	0.76389	0.678808
NZ_CP011454.1	3643935	3644510	-	CDS	GEMMAAP_RS15395	WP_082821386.1	signal peptidase II	9.21067	0.0176461	0.267008	-0.266864	-0.0368683	-0.469838	-0.172649	0.972534	0.419269	0.673728	0.99968	0.0618746	0.737004
NZ_CP011454.1	4498101	4498940	-	CDS	GEMMAAP_RS18955	WP_053334606.1	LytTR family DNA-binding domain-containing protein	3.61024	-0.0553118	0.302877	-0.266732	-0.10738	-0.158869	0.216246	0.881555	0.38401	0.650864	0.99968	0.478526	0.606235
NZ_CP011454.1	2972223	2973023	+	CDS	GEMMAAP_RS12605	WP_026849493.1	prolipoprotein diacylglyceryl transferase	4.6844	-0.246708	0.0451625	-0.266499	-0.17476	-0.657582	0.254702	0.456582	0.951335	0.730683	0.99968	0.00929967	0.595002
NZ_CP011454.1	1751578	1752192	+	CDS	GEMMAAP_RS07265	WP_043581357.1	fumarylacetoacetate hydrolase family protein	7.11695	-1.01155	-0.821729	-0.265785	-0.28098	-0.209348	-0.750573	0.0185308	0.0888605	0.817464	0.99968	0.596875	0.220405
NZ_CP011454.1	1379959	1382736	+	CDS	GEMMAAP_RS05735	WP_082821095.1	serine/threonine protein kinase	6.30905	0.049421	0.388506	-0.265256	0.0808131	-0.413458	0.195074	0.862697	0.118475	0.556697	0.99968	0.022349	0.575106
NZ_CP011454.1	1873383	1873853	+	CDS	GEMMAAP_RS07755	WP_075071461.1	chemotaxis protein CheW	5.79789	0.195253	0.267488	-0.265247	-0.107222	0.430548	-0.199134	0.321265	0.243416	0.494565	0.99968	0.0119795	0.554176
NZ_CP011454.1	4608820	4611006	+	CDS	GEMMAAP_RS19385	WP_026848851.1	type VI secretion system tip protein VgrG	6.04098	0.0333078	0.146952	-0.264759	0.00586654	0.462495	0.10678	0.999267	0.517745	0.410211	0.99968	0.00291711	0.752323
NZ_CP011454.1	1174485	1174970	-	CDS	GEMMAAP_RS04845	WP_026850016.1	tetratricopeptide repeat protein	8.74948	-0.218631	-0.47977	-0.26434	0.0151002	-0.600408	-0.152928	0.348571	0.0562415	0.563248	0.99968	0.00370921	0.70428
NZ_CP011454.1	3357527	3358675	-	CDS	GEMMAAP_RS14250	WP_202969141.1	chromate efflux transporter	6.50741	-0.111833	0.0166497	-0.263722	-0.180732	-0.271389	0.190899	0.735852	0.978962	0.686058	0.99968	0.248661	0.682875
NZ_CP011454.1	4495005	4495577	-	CDS	GEMMAAP_RS18935	WP_043581775.1	pentapeptide repeat-containing protein	4.42773	-0.186769	-0.0241162	-0.263449	0.126503	-0.678378	0.265239	0.636968	0.976021	0.780174	0.99968	0.00693297	0.571783
NZ_CP011454.1	3593888	3594742	+	CDS	GEMMAAP_RS15195	WP_026848516.1	arsenite methyltransferase	3.70174	-0.391988	-0.274652	-0.263441	-0.388682	-0.0529239	0.0653777	0.232308	0.57398	0.741162	0.99968	0.862371	0.92312
NZ_CP011454.1	4228687	4229301	+	CDS	GEMMAAP_RS17825	WP_026848137.1	GNAT family N-acetyltransferase	4.88829	-0.253129	0.0634615	-0.262695	-0.168639	-0.324375	0.0759879	0.428369	0.924965	0.725053	0.99968	0.191633	0.908156
NZ_CP011454.1	18616	19362	+	CDS	GEMMAAP_RS00090	WP_026848943.1	type 1 glutamine amidotransferase domain-containing protein	3.99098	-0.554602	-0.566824	-0.262559	-0.300445	-0.399695	0.594515	0.235101	0.372785	0.849438	0.99968	0.276979	0.337827
NZ_CP011454.1	2937249	2938400	-	CDS	GEMMAAP_RS12460	WP_043580654.1	P-loop NTPase	6.48304	-0.114586	-0.288804	-0.261923	0.186077	-0.390749	-0.245973	0.623238	0.223826	0.542039	0.99968	0.0252602	0.428351
NZ_CP011454.1	3766503	3767459	+	CDS	GEMMAAP_RS15925	WP_145979176.1	hypothetical protein	5.6855	-0.466552	-0.580359	-0.259294	-0.318777	0.152747	-0.329651	0.100145	0.0941341	0.694829	0.99968	0.560089	0.478289
NZ_CP011454.1	249165	249878	+	CDS	GEMMAAP_RS01070	WP_043580108.1	DUF429 domain-containing protein	4.24298	0.0406365	0.0853097	-0.259259	-0.120556	0.267691	-0.175743	0.919852	0.870925	0.833648	0.99968	0.237481	0.720387
NZ_CP011454.1	3638047	3638859	+	CDS	GEMMAAP_RS15365	WP_026848493.1	matrixin family metalloprotease	5.29894	-0.0706449	-0.589344	-0.259114	-0.441355	-0.239844	-0.0161701	0.90779	0.256779	0.837897	0.99968	0.534872	0.994981
NZ_CP011454.1	1799385	1800161	+	CDS	GEMMAAP_RS07490	WP_026850465.1	class I SAM-dependent methyltransferase	5.57626	-0.200904	-0.0757921	-0.258909	-0.111475	-0.484016	0.0649746	0.453357	0.876481	0.641542	0.99968	0.0205536	0.906279
NZ_CP011454.1	2979667	2981571	+	CDS	GEMMAAP_RS12635	WP_053334060.1	serine/threonine protein kinase	7.47038	0.00912828	0.221996	-0.258473	-0.151218	-0.470693	0.0555937	0.982818	0.344791	0.513046	0.99968	0.00851031	0.901509
NZ_CP011454.1	3987019	3987867	-	CDS	GEMMAAP_RS16835	WP_026848277.1	enoyl-CoA hydratase family protein	4.56124	0.256104	0.411516	-0.258244	0.0869542	1.05925	0.27197	0.447146	0.306373	0.739684	0.99968	0.000382671	0.637095
NZ_CP011454.1	1488725	1491352	-	CDS	GEMMAAP_RS06130	WP_026850260.1	prolyl oligopeptidase family serine peptidase	7.91192	0.00572246	0.428563	-0.258005	0.0204203	0.0852352	0.195189	0.992343	0.121175	0.641542	0.99968	0.733243	0.655851
NZ_CP011454.1	721572	722687	-	CDS	GEMMAAP_RS03115	WP_026849381.1	hypothetical protein	6.20092	-0.431532	-0.342477	-0.257615	-0.206811	-0.302336	-0.066782	0.0543674	0.197497	0.605597	0.99968	0.119683	0.889691
NZ_CP011454.1	3708650	3710257	-	CDS	GEMMAAP_RS15705	WP_053333646.1	NAD(P)-binding protein	6.21773	-0.547905	-0.124366	-0.257059	-0.244394	0.688488	0.0942867	0.105652	0.826428	0.765136	0.99968	0.0206934	0.906444
NZ_CP011454.1	4220161	4220862	+	CDS	GEMMAAP_RS17795	WP_053333541.1	gluconate 2-dehydrogenase subunit 3 family protein	4.99106	0.188418	-0.0355215	-0.256941	-0.0615024	0.187396	0.0682757	0.417896	0.944536	0.59311	0.99968	0.312242	0.935404
NZ_CP011454.1	1390973	1391686	+	CDS	GEMMAAP_RS05775	WP_053334209.1	hypothetical protein	4.39201	0.402048	0.348525	-0.256825	0.183144	0.292919	-0.116297	0.148055	0.323707	0.689011	0.99968	0.189928	0.817825
NZ_CP011454.1	966882	968507	+	CDS	GEMMAAP_RS04030	WP_026850145.1	ABC transporter permease	6.56234	-0.0255725	0.186427	-0.256716	-0.224754	0.3703	0.0264629	0.932701	0.698429	0.512383	0.99968	0.0274881	0.970223
NZ_CP011454.1	4527625	4528056	-	CDS	GEMMAAP_RS19055	WP_026850995.1	fimbrillin family protein	5.06888	-0.155298	0.357257	-0.256253	0.00475079	0.0654675	0.222808	0.641658	0.318564	0.719077	0.99968	0.818754	0.646991
NZ_CP011454.1	3141191	3142372	-	CDS	GEMMAAP_RS13310	WP_026848801.1	type IV pilus twitching motility protein PilT	7.28992	0.0849537	-0.26855	-0.255995	-0.23475	-0.327268	-0.0773477	0.838204	0.500709	0.743139	0.99968	0.24972	0.916712
NZ_CP011454.1	400835	401401	+	CDS	GEMMAAP_RS01800	WP_026849189.1	hypothetical protein	3.8784	0.105579	0.00331645	-0.255267	-0.148612	0.165529	0.273591	0.815439	0.997634	0.794568	0.99968	0.60014	0.648784
NZ_CP011454.1	4321303	4321944	-	CDS	GEMMAAP_RS18210	WP_026850874.1	class I SAM-dependent methyltransferase	3.62906	-0.750626	-0.554625	-0.254894	-0.18711	-0.149606	0.226779	0.0269586	0.201812	0.775853	0.99968	0.624774	0.693722
NZ_CP011454.1	3414327	3415682	-	CDS	GEMMAAP_RS14480	WP_053333709.1	aminotransferase class V-fold PLP-dependent enzyme	8.37494	-0.919979	-0.609749	-0.254806	-0.232537	-0.373707	-0.380287	0.0313928	0.189733	0.825188	0.99968	0.325729	0.597185
NZ_CP011454.1	214773	215507	+	CDS	GEMMAAP_RS00935	WP_053333898.1	peptidylprolyl isomerase	4.70859	0.039308	-0.0630648	-0.254689	-0.0529143	-0.183922	0.0636302	0.995923	0.898808	0.586344	0.99968	0.311631	0.885879
NZ_CP011454.1	4240771	4242114	+	CDS	GEMMAAP_RS17885	WP_145979223.1	response regulator	5.2038	0.127467	0.124127	-0.254352	-0.0651145	0.591164	0.288159	0.666684	0.763685	0.643332	0.99968	0.00640779	0.471608
NZ_CP011454.1	497232	498545	+	CDS	GEMMAAP_RS02165	WP_026849238.1	hypothetical protein	5.24982	-0.457735	-0.556851	-0.25432	-0.245293	-0.112591	-0.0437207	0.0964559	0.103897	0.701569	0.99968	0.652852	0.950658
NZ_CP011454.1	430017	430562	+	CDS	GEMMAAP_RS01915	WP_026849205.1	DUF4256 domain-containing protein	5.29113	0.416558	0.140922	-0.253564	-0.261666	0.140077	0.0191292	0.12603	0.748717	0.689011	0.99968	0.544635	0.984799
NZ_CP011454.1	2473607	2475091	-	CDS	GEMMAAP_RS10545	WP_026849796.1	amino acid permease	6.60557	-0.691975	-0.700707	-0.253519	-0.0709343	-0.164595	-0.352111	0.00403025	0.01577	0.630711	0.99968	0.429283	0.296215
NZ_CP011454.1	4530998	4531987	+	CDS	GEMMAAP_RS19070	WP_202969168.1	DUF1080 domain-containing protein	6.19276	-0.24088	-0.347296	-0.253496	-0.0154795	0.173137	-0.140488	0.212348	0.130416	0.514087	0.99968	0.290131	0.666269
NZ_CP011454.1	2029402	2029917	-	CDS	GEMMAAP_RS08420	WP_026850608.1	hypothetical protein	5.40405	0.00972533	0.120659	-0.253496	-0.0014937	-0.0139948	-0.0145506	0.983876	0.733052	0.620515	0.99968	0.957679	0.98831
NZ_CP011454.1	1623623	1625209	-	CDS	GEMMAAP_RS06730	WP_053334346.1	sodium/solute symporter	5.94053	-0.225815	-0.127691	-0.25341	-0.0381986	-0.0116919	-0.0370266	0.398794	0.75417	0.672897	0.99968	0.966888	0.955594
NZ_CP011454.1	3294272	3294718	+	CDS	GEMMAAP_RS13955	WP_053333736.1	BlaI/MecI/CopY family transcriptional regulator	4.73482	0.0695573	0.305508	-0.253339	-0.0193587	0.183152	-0.0871525	0.815439	0.294425	0.614674	0.99968	0.365224	0.954576
NZ_CP011454.1	1494491	1495393	+	CDS	GEMMAAP_RS06150	WP_145979025.1	hypothetical protein	6.69877	-0.419383	-0.351446	-0.252826	-0.300766	0.0251604	-0.0977128	0.0449421	0.141996	0.569535	0.99968	0.912501	0.809282
NZ_CP011454.1	1759976	1760926	+	CDS	GEMMAAP_RS07315	WP_043581358.1	alpha/beta hydrolase	4.78995	0.13801	0.0369396	-0.252388	-0.19452	0.180148	0.167005	0.620668	0.953916	0.636419	0.99968	0.392119	0.690847
NZ_CP011454.1	1503697	1504920	-	CDS	GEMMAAP_RS06190	WP_026850269.1	nucleoside permease	5.47106	0.455285	0.126111	-0.25176	0.0529437	-0.0755536	-0.325433	0.0704433	0.757376	0.669655	0.99968	0.757641	0.388313
NZ_CP011454.1	1391977	1392966	+	CDS	GEMMAAP_RS05780	WP_082821097.1	proline iminopeptidase-family hydrolase	5.97941	0.031609	0.0882212	-0.25109	-0.0193973	0.073891	0.0869269	0.920583	0.799557	0.563248	0.99968	0.706966	0.819371
NZ_CP011454.1	2430546	2431160	-	CDS	GEMMAAP_RS10305	WP_053334185.1	nicotinate (nicotinamide) nucleotide adenylyltransferase	8.05796	-0.119411	-0.123855	-0.25092	-0.483916	0.0913763	-0.163863	0.68978	0.730643	0.650864	0.99968	0.719722	0.72303
NZ_CP011454.1	4486088	4487164	-	CDS	GEMMAAP_RS18905	WP_026850973.1	hypothetical protein	4.78314	-0.980037	-0.713175	-0.2509	-0.2119	-0.369066	-0.13722	0.00024606	0.018865	0.626227	0.99968	0.0572188	0.731959
NZ_CP011454.1	53919	54500	-	CDS	GEMMAAP_RS00240	WP_026848965.1	RNA polymerase sigma factor	7.87109	-0.647158	-0.765624	-0.250817	-0.441643	-1.0303	-0.523643	0.179396	0.153141	0.86148	0.99968	0.0172597	0.50196
NZ_CP011454.1	2623078	2623377	-	CDS	GEMMAAP_RS11190	WP_026849705.1	hypothetical protein	4.55233	-0.2212	-0.237291	-0.250342	-0.218048	-0.499523	0.135135	0.447146	0.545463	0.707498	0.99968	0.0234367	0.766457
NZ_CP011454.1	3223903	3225216	+	CDS	GEMMAAP_RS13655	WP_026848747.1	glycogen-binding domain-containing protein	9.06113	0.0019302	0.577521	-0.250038	0.0291309	-0.232967	-0.0185361	0.997197	0.0261237	0.598869	0.99968	0.252709	0.983664
NZ_CP011454.1	1188868	1190355	+	CDS	GEMMAAP_RS04910	WP_082821075.1	glycerol kinase GlpK	7.51487	-0.797437	-0.386868	-0.249665	-0.32764	0.0639381	0.036812	0.00784369	0.244113	0.719684	0.99968	0.836322	0.966122
NZ_CP011454.1	4514601	4514807	-	CDS	GEMMAAP_RS19005	WP_026850986.1	hypothetical protein	1.9453	-1.00361	-0.111324	-0.249519	0.0910403	-0.367092	0.295329	0.129822	0.944381	0.909761	0.99968	0.427352	0.749682
NZ_CP011454.1	272022	273308	+	CDS	GEMMAAP_RS01200	WP_043580111.1	FAD-dependent oxidoreductase	9.75811	1.58484	0.533152	-0.249155	-0.68812	0.510045	0.151532	0.0189841	0.492324	0.908791	0.99968	0.382378	0.916922
NZ_CP011454.1	4523872	4524378	-	CDS	GEMMAAP_RS19035	WP_026850991.1	peptide-methionine (S)-S-oxide reductase MsrA	7.07715	-0.353337	-0.29595	-0.249061	-0.176141	-0.265562	-0.403179	0.0884946	0.205622	0.560456	0.99968	0.148931	0.179617
NZ_CP011454.1	3260352	3261968	+	CDS	GEMMAAP_RS13800	WP_026848723.1	GMC family oxidoreductase	6.03161	0.325488	0.334401	-0.248998	-0.114058	0.361976	0.144435	0.109673	0.163427	0.556697	0.99968	0.0343323	0.678808
NZ_CP011454.1	2329150	2330046	-	CDS	GEMMAAP_RS09870	WP_053334486.1	MBL fold metallo-hydrolase	6.5977	0.0481341	0.069504	-0.248636	-0.161129	-0.094503	-0.0162898	0.842407	0.822422	0.499532	0.99968	0.570409	0.980408
NZ_CP011454.1	3837866	3839092	+	CDS	GEMMAAP_RS16230	WP_053333624.1	histidinol-phosphate aminotransferase family protein	7.15212	-0.239214	0.111793	-0.248535	0.0759714	-0.163248	-0.22448	0.153731	0.609265	0.418432	0.99968	0.27315	0.378064
NZ_CP011454.1	3227435	3228058	-	CDS	GEMMAAP_RS13665	WP_026848745.1	outer membrane beta-barrel protein	8.42022	-1.63279	-1.51972	-0.248317	-0.318396	-0.533487	-0.955628	0.00353088	0.0156604	0.870772	0.99968	0.240182	0.19705
NZ_CP011454.1	3394199	3394309	-	CDS	GEMMAAP_RS20340	WP_158514875.1	hypothetical protein	4.18614	-0.225887	0.262897	-0.248065	-0.43305	-0.472917	0.315484	0.752224	0.793999	0.904898	0.99968	0.256588	0.70428
NZ_CP011454.1	2011887	2014139	+	CDS	GEMMAAP_RS08350	WP_026850597.1	BatD family protein	7.29306	-0.346696	-0.363489	-0.247971	-0.308882	0.150274	-0.416493	0.12741	0.149914	0.614818	0.99968	0.47897	0.20754
NZ_CP011454.1	3126517	3127158	-	CDS	GEMMAAP_RS13245	WP_202969135.1	response regulator transcription factor	3.71693	-0.609449	-0.605438	-0.247931	-0.187419	0.28665	-0.480447	0.119252	0.24092	0.838433	0.99968	0.367535	0.400838
NZ_CP011454.1	3294711	3295763	+	CDS	GEMMAAP_RS13960	WP_026848697.1	M56 family metallopeptidase	5.42991	-0.0435188	-0.0340141	-0.247875	-0.0268938	0.398999	-0.0884207	0.870991	0.937271	0.52923	0.99968	0.0169951	0.81396
NZ_CP011454.1	2280912	2282099	-	CDS	GEMMAAP_RS09640	WP_026850729.1	RIP metalloprotease RseP	7.63496	-0.515199	-0.31348	-0.247871	-0.382044	-0.0513007	-0.395937	0.0313928	0.243995	0.637188	0.99968	0.842853	0.270917
NZ_CP011454.1	811570	812439	-	CDS	GEMMAAP_RS03455	WP_053334306.1	transporter substrate-binding domain-containing protein	7.5787	-0.146061	-0.041149	-0.246119	-0.127534	-0.234885	-0.00427115	0.585575	0.932631	0.641542	0.99968	0.267783	0.996981
NZ_CP011454.1	2110565	2112055	+	CDS	GEMMAAP_RS08815	WP_043581659.1	FxLYD domain-containing protein	7.8467	-0.562932	-0.0721118	-0.246107	-0.182161	-0.304315	-0.393464	0.046969	0.885769	0.711875	0.99968	0.228408	0.364552
NZ_CP011454.1	2772388	2775753	-	CDS	GEMMAAP_RS11795	WP_026849617.1	S41 family peptidase	6.672	0.145432	-0.00851214	-0.245058	0.0110987	0.023199	-0.153919	0.400026	0.981452	0.434414	0.99968	0.893242	0.585387
NZ_CP011454.1	4131152	4132057	+	CDS	GEMMAAP_RS17405	WP_026848202.1	pirin family protein	7.42582	-0.220329	-0.15945	-0.244673	-0.182672	0.191331	0.0657198	0.258523	0.507347	0.52679	0.99968	0.262186	0.869503
NZ_CP011454.1	3985816	3987012	-	CDS	GEMMAAP_RS16830	WP_026848278.1	acyl-CoA dehydrogenase family protein	4.59491	0.336998	0.168477	-0.244604	-0.146494	1.07766	0.278702	0.225784	0.699957	0.710665	0.99968	9.40154e-05	0.570203
NZ_CP011454.1	3475734	3476942	-	CDS	GEMMAAP_RS14705	WP_202969145.1	ferrochelatase	8.02179	-1.00229	-0.295794	-0.244168	0.00870543	0.140564	-0.138936	0.00227731	0.415982	0.741162	0.99968	0.635573	0.8133
NZ_CP011454.1	804080	804985	-	CDS	GEMMAAP_RS03430	WP_053334309.1	ABC transporter substrate-binding protein	5.98191	0.140549	0.144101	-0.244151	0.143479	-0.159795	0.070465	0.491356	0.582302	0.528018	0.99968	0.330674	0.847123
NZ_CP011454.1	4230868	4231140	-	CDS	GEMMAAP_RS17845	WP_026848133.1	hypothetical protein	3.55688	0.220935	-0.144782	-0.243637	0.234527	-0.216482	0.00757378	0.398962	0.787365	0.673875	0.99968	0.272896	0.994981
NZ_CP011454.1	608973	609515	-	CDS	GEMMAAP_RS02705	WP_043580178.1	AAA family ATPase	4.57554	-0.197097	-0.151298	-0.243582	-0.12467	-0.375082	0.129964	0.426086	0.849376	0.655908	0.99968	0.0455991	0.73568
NZ_CP011454.1	2935131	2935892	-	CDS	GEMMAAP_RS12450	WP_026849519.1	SAM-dependent chlorinase/fluorinase	5.51686	-0.301581	-0.166592	-0.243047	-0.0906339	-0.393986	0.0370635	0.152	0.567856	0.586457	0.99968	0.026219	0.944389
NZ_CP011454.1	4117250	4119862	+	CDS	GEMMAAP_RS17365	WP_053333560.1	zinc-dependent metalloprotease	6.5918	-0.178789	-0.199908	-0.242946	-0.290768	-0.0100112	-0.17645	0.473535	0.507714	0.648653	0.99968	0.969378	0.663102
NZ_CP011454.1	4255353	4256741	+	CDS	GEMMAAP_RS17945	WP_043579308.1	L-serine ammonia-lyase%2C iron-sulfur-dependent%2C subunit alpha	5.14903	0.223657	-0.0338477	-0.242844	0.0582496	-0.284249	0.189835	0.429179	0.957088	0.70522	0.99968	0.221043	0.684957
NZ_CP011454.1	88455	90104	-	CDS	GEMMAAP_RS00370	WP_026848985.1	DUF885 family protein	4.81056	0.339231	-0.0913641	-0.242315	-0.171787	-0.113144	0.0263617	0.162503	0.996159	0.680711	0.99968	0.598834	0.972241
NZ_CP011454.1	1718801	1719634	+	CDS	GEMMAAP_RS07130	WP_026850412.1	sugar phosphate isomerase/epimerase	6.06178	-0.092585	0.110716	-0.242039	0.041493	-0.499721	-0.147996	0.740281	0.712491	0.560456	0.99968	0.00459693	0.666269
NZ_CP011454.1	1488017	1488691	-	CDS	GEMMAAP_RS06125	WP_026850259.1	acyloxyacyl hydrolase	6.43283	-0.0870623	0.598897	-0.241646	-0.0122815	0.534196	0.0904442	0.856752	0.14887	0.811858	0.99968	0.0875501	0.913971
NZ_CP011454.1	4666869	4667591	+	CDS	GEMMAAP_RS19660	WP_026848895.1	hypothetical protein	4.96122	0.369278	0.466955	-0.240423	0.0145613	0.213559	0.278652	0.136091	0.120164	0.666453	0.99968	0.316406	0.476513
NZ_CP011454.1	4400882	4401502	-	CDS	GEMMAAP_RS18555	WP_053334586.1	MarR family transcriptional regulator	6.02609	0.0671002	-0.116154	-0.240413	0.0185255	-0.137987	0.0329951	0.84003	0.773026	0.689292	0.99968	0.543916	0.963271
NZ_CP011454.1	4605042	4606052	+	CDS	GEMMAAP_RS19375	WP_053333817.1	type VI secretion system baseplate subunit TssG	5.49323	0.0287852	-0.292452	-0.240339	0.0332492	0.757571	0.0677524	0.936282	0.320186	0.645068	0.99968	0.000558008	0.899767
NZ_CP011454.1	4436448	4436921	-	CDS	GEMMAAP_RS18685	WP_026850941.1	cytochrome b562	6.77331	-0.382261	-0.279734	-0.239265	-0.301105	0.0852543	0.0761666	0.133107	0.358869	0.690193	0.99968	0.736136	0.889114
NZ_CP011454.1	2506185	2507039	-	CDS	GEMMAAP_RS10690	WP_026849776.1	amidohydrolase family protein	5.26216	0.333623	0.0391593	-0.239204	-0.134418	-0.0347634	0.208433	0.0820695	0.954961	0.546297	0.99968	0.858338	0.481127
NZ_CP011454.1	2586855	2587298	-	CDS	GEMMAAP_RS10985	WP_158514821.1	pyridoxamine 5'-phosphate oxidase family protein	5.19896	-0.435794	-0.250328	-0.23899	-0.230278	-0.348236	-0.0871555	0.0796366	0.447375	0.686058	0.99968	0.0896392	0.855781
NZ_CP011454.1	1741516	1742241	+	CDS	GEMMAAP_RS07240	WP_082821142.1	DUF4159 domain-containing protein	6.83821	-0.632894	-0.755564	-0.238718	-0.365623	-0.339545	-0.56531	0.110775	0.0983215	0.837897	0.99968	0.337969	0.347826
NZ_CP011454.1	4089916	4090443	-	CDS	GEMMAAP_RS17250	WP_026848220.1	DinB family protein	2.63137	0.427623	0.176681	-0.238438	-0.0205937	0.458647	0.0910424	0.21283	0.769618	0.80647	0.99968	0.136785	0.918337
NZ_CP011454.1	641154	642623	-	CDS	GEMMAAP_RS02820	WP_026849339.1	4-alpha-glucanotransferase	2.86605	0.143246	-0.334111	-0.237324	0.176985	0.612025	0.250599	0.74688	0.570404	0.817464	0.99968	0.0245196	0.666269
NZ_CP011454.1	507621	508217	+	CDS	GEMMAAP_RS02205	WP_026849244.1	class I SAM-dependent methyltransferase	5.5112	-0.282424	-0.162788	-0.237188	-0.253725	-0.0151047	-0.310365	0.188477	0.586648	0.615802	0.99968	0.947786	0.339271
NZ_CP011454.1	243982	244908	-	CDS	GEMMAAP_RS01045	WP_026849075.1	UDP-N-acetylmuramate dehydrogenase	6.87609	-0.508957	-0.30356	-0.237084	-0.140312	-0.429271	0.137682	0.0466764	0.324274	0.691681	0.99968	0.0493574	0.761491
NZ_CP011454.1	3119854	3120225	+	CDS	GEMMAAP_RS13200	WP_053333777.1	BON domain-containing protein	1.44471	-0.122018	-0.245375	-0.236628	-0.336862	-0.494799	-0.384405	0.883252	0.847993	0.90846	0.99968	0.335203	0.726775
NZ_CP011454.1	2280460	2280915	-	CDS	GEMMAAP_RS09635	WP_145979078.1	hypothetical protein	6.12423	-0.174817	-0.230477	-0.23544	-0.0959453	0.106279	-0.372417	0.397183	0.343894	0.57529	0.99968	0.571421	0.207752
NZ_CP011454.1	3151733	3153334	+	CDS	GEMMAAP_RS13330	WP_075071521.1	LptF/LptG family permease	6.85905	-0.464394	-0.328777	-0.235358	-0.250092	-0.496459	-0.21773	0.00735067	0.0897321	0.486471	0.99968	0.00163546	0.400838
NZ_CP011454.1	120427	121068	-	CDS	GEMMAAP_RS00510	WP_145978925.1	hypothetical protein	3.74061	-0.436358	-0.629789	-0.235182	-0.288581	-0.206311	0.250312	0.145703	0.111609	0.752154	0.99968	0.415511	0.597185
NZ_CP011454.1	240133	243879	-	CDS	GEMMAAP_RS01040	WP_026849074.1	TonB-dependent receptor	8.81101	-0.545952	-0.825008	-0.234957	-0.511915	-0.0661276	-0.743964	0.25711	0.116348	0.867875	0.99968	0.895137	0.296215
NZ_CP011454.1	4554070	4554858	-	CDS	GEMMAAP_RS19190	WP_145979251.1	outer membrane lipoprotein-sorting protein	5.39948	0.0820523	0.259217	-0.234815	-0.135428	-0.0150665	-0.120393	0.818777	0.490707	0.737052	0.99968	0.960811	0.817825
NZ_CP011454.1	814932	815528	-	CDS	GEMMAAP_RS19925	WP_053334305.1	YggT family protein	7.18655	-0.482047	-0.454373	-0.234711	-0.105554	-0.373457	-0.240095	0.0654606	0.126012	0.707349	0.99968	0.103823	0.593513
NZ_CP011454.1	4011001	4013043	-	CDS	GEMMAAP_RS16920	WP_158514909.1	PAS domain-containing protein	6.01153	0.248022	0.288513	-0.234453	-0.0484455	0.0519586	0.103323	0.164886	0.164004	0.511858	0.99968	0.771239	0.752323
NZ_CP011454.1	4483717	4484298	+	CDS	GEMMAAP_RS18880	WP_026850969.1	hypothetical protein	4.91399	-0.406669	-0.244877	-0.234028	-0.00896369	-0.206196	-0.0738548	0.172017	0.554851	0.77118	0.99968	0.435449	0.913254
NZ_CP011454.1	3527591	3528739	-	CDS	GEMMAAP_RS14885	WP_053333687.1	DUF2911 domain-containing protein	7.21605	-0.109718	-0.238494	-0.233966	-0.0961634	-0.319112	-0.105465	0.559606	0.21914	0.49428	0.99968	0.0310903	0.726411
NZ_CP011454.1	2641984	2642724	+	CDS	GEMMAAP_RS11270	WP_026849692.1	SIMPL domain-containing protein	6.3724	-0.795566	-0.732846	-0.233927	-0.361911	-0.680979	-0.680493	0.0297882	0.0915276	0.819105	0.99968	0.0326471	0.196102
NZ_CP011454.1	655086	658466	+	CDS	GEMMAAP_RS02850	WP_158514703.1	VCBS repeat-containing protein	5.07511	-0.247023	-0.324044	-0.233831	-0.167253	0.452034	0.0180242	0.334921	0.306603	0.686058	0.99968	0.0279556	0.986152
NZ_CP011454.1	2226191	2227087	+	CDS	GEMMAAP_RS09400	WP_026850763.1	hypothetical protein	6.2778	-0.242208	-0.327899	-0.232911	-0.165204	-0.468174	-0.0937393	0.158478	0.104968	0.505323	0.99968	0.00285283	0.76256
NZ_CP011454.1	3001152	3001502	-	CDS	GEMMAAP_RS12730	WP_026849473.1	hypothetical protein	6.04848	-0.0456059	-0.202378	-0.232765	-0.208101	-0.385658	0.617185	0.879378	0.477428	0.630711	0.99968	0.036298	0.0232591
NZ_CP011454.1	203264	203944	+	CDS	GEMMAAP_RS00895	WP_026849053.1	hypothetical protein	5.0431	-0.187654	-0.120161	-0.232488	-0.148731	0.415703	-0.0237958	0.428222	0.991762	0.639628	0.99968	0.0290283	0.99514
NZ_CP011454.1	2348490	2349548	-	CDS	GEMMAAP_RS09970	WP_026850680.1	heat-inducible transcriptional repressor HrcA	6.96074	-0.306248	-0.364745	-0.232009	-0.185988	-0.407139	-0.0623702	0.0705483	0.0658344	0.495366	0.99968	0.00723808	0.855781
NZ_CP011454.1	4668417	4670339	+	CDS	GEMMAAP_RS19670	WP_053333830.1	pyrroloquinoline quinone-dependent dehydrogenase	4.83643	-0.0192487	0.0304606	-0.231974	0.0019503	-0.216266	-0.087785	0.957788	0.953916	0.645068	0.99968	0.245068	0.888686
NZ_CP011454.1	3230630	3231211	+	CDS	GEMMAAP_RS13685	WP_053333749.1	C40 family peptidase	7.78031	-0.348531	-0.498387	-0.231845	-0.226079	-0.35766	-0.101438	0.188603	0.0925297	0.711184	0.99968	0.125847	0.848047
NZ_CP011454.1	1800158	1801312	+	CDS	GEMMAAP_RS07495	WP_145979047.1	carboxypeptidase regulatory-like domain-containing protein	5.30885	-0.0357481	0.081465	-0.231749	-0.0784515	-0.0144703	0.179797	0.895452	0.791	0.550896	0.99968	0.943971	0.578654
NZ_CP011454.1	407626	408315	-	CDS	GEMMAAP_RS01835	WP_026849195.1	hypothetical protein	8.19077	-1.25297	-1.25693	-0.231651	-0.62585	0.344335	0.44156	0.0325757	0.0608665	0.905381	0.99968	0.518333	0.659705
NZ_CP011454.1	4313435	4314472	-	CDS	GEMMAAP_RS18170	WP_053334562.1	alpha/beta hydrolase	6.10384	0.178831	0.0779415	-0.231063	0.0461668	0.211485	0.0432929	0.370666	0.804506	0.56348	0.99968	0.204076	0.922842
NZ_CP011454.1	3661718	3662320	+	CDS	GEMMAAP_RS15495	WP_043579414.1	HD domain-containing protein	4.53828	-0.468566	-0.261105	-0.230773	-0.0948377	-0.216301	0.158002	0.0823402	0.468119	0.727975	0.99968	0.380594	0.753609
NZ_CP011454.1	4612126	4612800	+	CDS	GEMMAAP_RS19400	WP_026848854.1	hypothetical protein	4.4705	0.0967083	-0.0257777	-0.230495	-0.100766	0.0506222	-0.0487581	0.776318	0.968768	0.740966	0.99968	0.85653	0.945671
NZ_CP011454.1	1740575	1741504	+	CDS	GEMMAAP_RS07235	WP_053334370.1	16S rRNA (cytidine(1402)-2'-O)-methyltransferase	8.36977	-0.527645	-0.333068	-0.229865	-0.346778	-0.267142	-0.288299	0.0595544	0.293206	0.730683	0.99968	0.288481	0.537339
NZ_CP011454.1	2019888	2020175	+	CDS	GEMMAAP_RS08380	WP_026850601.1	co-chaperone GroES	6.46229	-0.136884	0.0553356	-0.229635	0.210407	-0.0874578	0.11424	0.654091	0.916875	0.722008	0.99968	0.747321	0.829172
NZ_CP011454.1	1045340	1046137	+	CDS	GEMMAAP_RS04345	WP_043581079.1	glycosyltransferase family 2 protein	9.34433	1.997	0.436806	-0.22898	-0.899358	0.687687	0.0577077	0.00605204	0.602818	0.92159	0.99968	0.242447	0.980408
NZ_CP011454.1	4679913	4681358	-	CDS	GEMMAAP_RS19730	WP_053333834.1	pyridoxal-phosphate dependent enzyme	7.42415	-0.000643453	-0.0454069	-0.228936	-0.169367	-0.203542	-0.0825151	0.999138	0.865125	0.412279	0.99968	0.12922	0.767056
NZ_CP011454.1	4294080	4295576	-	CDS	GEMMAAP_RS18095	WP_026848094.1	carboxypeptidase-like regulatory domain-containing protein	5.07042	0.269744	0.355799	-0.228687	-0.0920244	0.16023	0.100784	0.316548	0.277712	0.709847	0.99968	0.4723	0.832008
NZ_CP011454.1	231087	233225	+	CDS	GEMMAAP_RS01010	WP_026849070.1	ankyrin repeat domain-containing protein	7.32075	0.153279	0.0573727	-0.228269	-0.0391022	0.621693	-0.256249	0.467558	0.870925	0.585039	0.99968	0.000896831	0.400523
NZ_CP011454.1	4380474	4382135	-	CDS	GEMMAAP_RS18470	WP_053334579.1	ATP-binding cassette domain-containing protein	4.80912	-0.137078	-0.195425	-0.228006	-0.119741	-0.280216	-0.188682	0.680419	0.763685	0.725053	0.99968	0.202345	0.672119
NZ_CP011454.1	4606113	4608773	+	CDS	GEMMAAP_RS19380	WP_026848850.1	type VI secretion system ATPase TssH	6.18012	0.292489	0.133672	-0.227836	0.170228	0.385693	-0.0100635	0.225196	0.712286	0.686058	0.99968	0.0608655	0.993659
NZ_CP011454.1	1651032	1652036	+	CDS	GEMMAAP_RS06850	WP_026850369.1	Gfo/Idh/MocA family oxidoreductase	7.09353	-0.0377778	0.173	-0.227649	-0.0646769	-0.00946656	0.0319917	0.871419	0.446081	0.495366	0.99968	0.961274	0.942903
NZ_CP011454.1	2838797	2839567	-	CDS	GEMMAAP_RS12040	WP_026849578.1	rhomboid family intramembrane serine protease	4.50555	-0.634934	-0.614479	-0.227621	-0.478363	-0.573307	0.0125352	0.0301359	0.0977757	0.774811	0.99968	0.0200154	0.993222
NZ_CP011454.1	3433710	3434810	-	CDS	GEMMAAP_RS14545	WP_053333706.1	phosphotransferase family protein	6.43548	0.196016	0.471717	-0.227391	-0.173581	0.612263	0.37256	0.370666	0.0569728	0.620515	0.99968	0.00183785	0.228323
NZ_CP011454.1	1138463	1139467	-	CDS	GEMMAAP_RS04700	WP_043581064.1	ABC transporter ATP-binding protein	5.73525	0.547274	0.60378	-0.227389	0.101022	0.351115	0.168798	0.000639463	0.00482446	0.397479	0.99968	0.00550917	0.4622
NZ_CP011454.1	3939662	3940486	-	CDS	GEMMAAP_RS16640	WP_145979200.1	hypothetical protein	4.60956	0.20312	0.461954	-0.227384	-0.0615228	-0.0144203	0.0366601	0.293559	0.0498473	0.556697	0.99968	0.94238	0.994981
NZ_CP011454.1	3923588	3925042	+	CDS	GEMMAAP_RS16575	WP_026848312.1	nitronate monooxygenase	7.6761	-3.35794	-2.32291	-0.227091	-0.682145	-2.92131	-1.46155	0.000639463	0.0199864	0.94232	0.99968	0.000452498	0.194606
NZ_CP011454.1	1702294	1703589	-	CDS	GEMMAAP_RS07065	WP_202969203.1	MFS transporter	6.45666	-0.144251	0.999211	-0.226799	0.0135278	0.0901698	0.128669	0.815439	0.0760715	0.883864	0.99968	0.862483	0.910232
NZ_CP011454.1	1493281	1494447	+	CDS	GEMMAAP_RS06145	WP_145979276.1	FAD-binding oxidoreductase	6.4765	-0.624268	-0.555606	-0.226482	-0.36273	0.185094	-0.030316	0.00713072	0.0428619	0.655286	0.99968	0.358835	0.963271
NZ_CP011454.1	3603344	3603610	-	CDS	GEMMAAP_RS15235	WP_026848511.1	DUF4242 domain-containing protein	2.93559	-0.0622025	-0.285539	-0.226348	-0.0305419	0.318353	-0.0972015	0.928436	0.702687	0.871685	0.99968	0.385406	0.92312
NZ_CP011454.1	3608866	3610098	-	CDS	GEMMAAP_RS15250	WP_026848508.1	cytochrome P450	4.44895	0.210002	0.27783	-0.225877	0.0693184	0.245958	0.034438	0.420239	0.392486	0.705659	0.99968	0.227741	0.959025
NZ_CP011454.1	3348668	3349786	+	CDS	GEMMAAP_RS14215	WP_053333725.1	BamA/TamA family outer membrane protein	4.15877	-1.8173	-1.29943	-0.225659	-0.0916118	-2.42682	-1.01297	0.00183216	0.0624438	0.90846	0.99968	8.97764e-06	0.117399
NZ_CP011454.1	4068772	4069254	-	CDS	GEMMAAP_RS17155	WP_145979208.1	hypothetical protein	5.0401	0.0260737	0.387709	-0.225618	-0.00927708	-0.229848	-0.19031	0.996133	0.120164	0.617311	0.99968	0.201444	0.594511
NZ_CP011454.1	2983571	2985583	+	CDS	GEMMAAP_RS12650	WP_082821571.1	carbon starvation protein A	5.5061	-0.17595	-0.0584053	-0.225487	0.211453	0.194415	-0.126145	0.503329	0.96378	0.703958	0.99968	0.331898	0.759771
NZ_CP011454.1	3661167	3661709	+	CDS	GEMMAAP_RS15490	WP_043579416.1	VTT domain-containing protein	2.77585	-0.283349	-0.371278	-0.224764	-0.356959	-0.287606	0.297322	0.497203	0.52123	0.838887	0.99968	0.43508	0.672255
NZ_CP011454.1	352100	352627	+	CDS	GEMMAAP_RS01550	WP_145978941.1	hypothetical protein	4.80244	0.025593	0.0771129	-0.224205	-0.242272	0.139608	0.343109	0.983876	0.867319	0.689011	0.99968	0.503732	0.309371
NZ_CP011454.1	1797581	1799248	-	CDS	GEMMAAP_RS07485	WP_026850464.1	S8 family serine peptidase	7.03039	-0.653744	-0.465823	-0.224117	-0.207909	-0.607164	-0.546237	0.0226047	0.145774	0.752154	0.99968	0.0166857	0.187828
NZ_CP011454.1	503297	504862	+	CDS	GEMMAAP_RS02190	WP_043580154.1	PDZ domain-containing protein	7.70304	-0.732689	-0.537868	-0.223967	-0.324669	-0.228926	-0.413509	0.00251645	0.0393508	0.655908	0.99968	0.260644	0.207752
NZ_CP011454.1	2939077	2939577	+	CDS	GEMMAAP_RS12470	WP_145979120.1	hypothetical protein	-0.101717	0.43441	0.69273	-0.223804	2.54467e-05	0.292134	0.374211	0.81904	0.804506	0.971791	0.999765	0.724562	0.835671
NZ_CP011454.1	3603638	3608203	-	CDS	GEMMAAP_RS15240	WP_158514885.1	protein kinase	6.00449	0.397024	0.296463	-0.223456	0.0279613	0.358262	0.183897	0.0217868	0.140513	0.512383	0.99968	0.0144164	0.500721
NZ_CP011454.1	270849	271313	+	CDS	GEMMAAP_RS01190	WP_202969175.1	hypothetical protein	6.92046	-0.402958	-0.476507	-0.223016	-0.177344	0.0883437	0.0446662	0.258523	0.253715	0.825188	0.99968	0.804008	0.964545
NZ_CP011454.1	1705592	1706956	-	CDS	GEMMAAP_RS07085	WP_053334365.1	ankyrin repeat domain-containing protein	6.13279	-0.160456	0.21189	-0.222986	0.137572	0.135501	-0.0244582	0.491225	0.439362	0.650864	0.99968	0.503661	0.974849
NZ_CP011454.1	191990	192247	+	CDS	GEMMAAP_RS00845	WP_026849044.1	hypothetical protein	4.45385	-0.444395	-0.644134	-0.222853	-0.23074	-0.524793	0.126171	0.141218	0.100178	0.794442	0.99968	0.0299216	0.810549
NZ_CP011454.1	4690726	4691841	-	CDS	GEMMAAP_RS19770	WP_026848912.1	DNA polymerase III subunit delta	7.11329	-0.221802	-0.120899	-0.222753	-0.151019	-0.168601	-0.240094	0.23289	0.625423	0.645068	0.99968	0.304495	0.391944
NZ_CP011454.1	3193293	3194378	-	CDS	GEMMAAP_RS13510	WP_026848769.1	hypothetical protein	7.16098	0.260169	0.344186	-0.222724	-0.187122	-0.0466513	-0.0349095	0.171235	0.108736	0.576739	0.99968	0.813094	0.944205
NZ_CP011454.1	4681956	4684298	+	CDS	GEMMAAP_RS19740	WP_026848908.1	Ig-like domain-containing protein	7.18094	-0.454152	-0.473412	-0.222427	-0.159231	-0.308123	-0.541712	0.078706	0.108327	0.724261	0.99968	0.174352	0.131444
NZ_CP011454.1	2638615	2639535	+	CDS	GEMMAAP_RS11255	WP_026849694.1	NAD(P)H-binding protein	5.12552	-1.79351	-0.922442	-0.222396	-0.28695	-3.12352	-1.34512	0.00227731	0.165867	0.908411	0.99968	8.6766e-07	0.0339078
NZ_CP011454.1	1426128	1427447	+	CDS	GEMMAAP_RS05895	WP_053334206.1	amino acid permease	5.66403	0.0437617	0.03964	-0.222278	-0.273531	-0.0142275	-0.209984	0.838204	0.987047	0.499532	0.99968	0.936201	0.396798
NZ_CP011454.1	2640763	2641905	+	CDS	GEMMAAP_RS11265	WP_053334135.1	histidine kinase	5.80882	-0.613443	-0.238667	-0.22208	-0.0277925	-0.50556	-0.27575	0.0250838	0.516995	0.749327	0.99968	0.0309768	0.537339
NZ_CP011454.1	4704418	4705161	-	CDS	GEMMAAP_RS19830	WP_026848919.1	response regulator	2.59073	-0.0723243	-0.240864	-0.221773	-0.545705	-0.0942426	-0.0490813	0.895353	0.742082	0.838887	0.99968	0.788437	0.962922
NZ_CP011454.1	4282174	4282674	-	CDS	GEMMAAP_RS18060	WP_053333529.1	2'-5' RNA ligase family protein	3.44772	-0.399128	-0.724911	-0.221466	-0.206867	-0.286792	0.120144	0.243274	0.108736	0.822738	0.99968	0.305918	0.859644
NZ_CP011454.1	2016913	2018076	+	CDS	GEMMAAP_RS08365	WP_026850599.1	N-acetyl-alpha-D-glucosaminyl L-malate synthase BshA	6.56707	-0.00649366	-0.181695	-0.221459	-0.206306	-0.118092	-0.168017	0.988442	0.533713	0.576739	0.99968	0.499016	0.602876
NZ_CP011454.1	4201244	4204336	-	CDS	GEMMAAP_RS17725	WP_053333545.1	exo-alpha-sialidase	5.27986	0.17771	-0.0482142	-0.220956	0.0612119	0.245996	0.16385	0.446182	0.975307	0.665748	0.99968	0.189928	0.666269
NZ_CP011454.1	2064305	2064916	+	CDS	GEMMAAP_RS08590	WP_026850632.1	hypothetical protein	6.36032	-0.525941	-0.432115	-0.220656	-0.233344	0.186213	-0.45044	0.0902104	0.238533	0.797677	0.99968	0.520096	0.347372
NZ_CP011454.1	346274	346927	+	CDS	GEMMAAP_RS01525	WP_043580130.1	nitroreductase family protein	6.126	-0.123231	-0.104034	-0.220594	-0.0727765	0.0422741	0.203644	0.520072	0.686385	0.545848	0.99968	0.8327	0.471608
NZ_CP011454.1	689316	691028	-	CDS	GEMMAAP_RS02985	WP_158514704.1	Ig-like domain-containing protein	8.03447	-0.462162	-0.538127	-0.22057	-0.20927	-0.165865	-0.602148	0.0845357	0.0723094	0.729929	0.99968	0.512552	0.104571
NZ_CP011454.1	3767498	3769771	+	CDS	GEMMAAP_RS15930	WP_026848417.1	tetratricopeptide repeat protein	6.65348	-0.390329	-0.0524305	-0.220521	-0.257741	0.405936	-0.179698	0.141214	0.923216	0.732913	0.99968	0.0784713	0.708743
NZ_CP011454.1	2468395	2469930	+	CDS	GEMMAAP_RS10525	WP_026849799.1	sodium:solute symporter	8.13182	-0.573665	-0.0840809	-0.220425	0.0085248	-0.46008	-0.0798195	0.00784369	0.787566	0.631855	0.99968	0.0141717	0.851438
NZ_CP011454.1	211767	212459	+	CDS	GEMMAAP_RS00920	WP_026849056.1	VIT family protein	4.97305	-0.140299	0.140024	-0.220229	-0.194491	-0.332304	0.184518	0.668553	0.760119	0.755185	0.99968	0.136355	0.679219
NZ_CP011454.1	56585	57229	-	CDS	GEMMAAP_RS00250	WP_202969212.1	SGNH/GDSL hydrolase family protein	3.28858	-0.243337	-0.142095	-0.220018	0.105913	-0.574069	-0.239997	0.478	0.850635	0.825188	0.99968	0.0275674	0.655851
NZ_CP011454.1	612645	614183	+	CDS	GEMMAAP_RS02725	WP_075071394.1	M20/M25/M40 family metallo-hydrolase	5.47444	0.0488523	0.108852	-0.219544	-0.163214	-0.0495506	-0.0135533	0.808303	0.626472	0.477101	0.99968	0.744807	0.980408
NZ_CP011454.1	1966250	1967350	+	CDS	GEMMAAP_RS08145	WP_145979055.1	hypothetical protein	2.91574	0.0103222	0.107482	-0.219525	0.0138714	0.578646	-0.00970274	0.990737	0.882068	0.838433	0.99968	0.0455991	0.996345
NZ_CP011454.1	1631424	1631747	+	CDS	GEMMAAP_RS06770	WP_026850355.1	FKBP-type peptidyl-prolyl cis-trans isomerase	7.0261	-0.363017	-0.307924	-0.219521	-0.00261671	-0.341706	0.110395	0.117403	0.25058	0.684437	0.99968	0.0894821	0.800429
NZ_CP011454.1	3197043	3197441	+	CDS	GEMMAAP_RS13530	WP_026848765.1	hypothetical protein	7.96659	-0.388024	-0.365379	-0.219414	-0.0931058	-0.228987	-0.242779	0.15946	0.235859	0.744438	0.99968	0.3582	0.607838
NZ_CP011454.1	4239048	4240505	-	CDS	GEMMAAP_RS17880	WP_082821457.1	sulfatase-like hydrolase/transferase	5.15164	-0.27313	-0.473996	-0.21908	-0.100343	-0.376599	-0.0850433	0.214522	0.0871811	0.65704	0.99968	0.0359422	0.833209
NZ_CP011454.1	1655322	1655984	+	CDS	GEMMAAP_RS06865	WP_026850371.1	hypothetical protein	5.61479	0.0777923	0.0691053	-0.218932	-0.136618	0.303685	0.0469679	0.960292	0.868103	0.652836	0.99968	0.103823	0.927073
NZ_CP011454.1	2716179	2716715	+	CDS	GEMMAAP_RS11570	WP_075071499.1	cyclic pyranopterin monophosphate synthase MoaC	8.05193	0.236978	0.392723	-0.218874	-0.200903	0.763691	0.358714	0.260408	0.0896938	0.625634	0.99968	0.000228246	0.231917
NZ_CP011454.1	4437134	4437670	+	CDS	GEMMAAP_RS18690	WP_026850942.1	Rieske 2Fe-2S domain-containing protein	5.60633	0.0649838	-0.224008	-0.218853	-0.0643507	0.268057	0.399071	0.922445	0.528448	0.710283	0.99968	0.166241	0.20754
NZ_CP011454.1	3535559	3536524	-	CDS	GEMMAAP_RS14935	WP_145979165.1	hypothetical protein	6.96632	-1.11352	-0.953521	-0.218761	-0.425903	-0.61849	-0.803246	0.008734	0.0483443	0.851663	0.99968	0.0861525	0.179617
NZ_CP011454.1	512498	513115	-	CDS	GEMMAAP_RS02230	WP_026849247.1	hypothetical protein	7.08342	-0.600395	-0.308543	-0.218727	-0.083805	-0.0988409	-0.00986841	0.0107424	0.245989	0.686058	0.99968	0.662278	0.993659
NZ_CP011454.1	4660096	4660320	-	CDS	GEMMAAP_RS19615	WP_145979261.1	hypothetical protein	4.04396	-0.578646	-0.398688	-0.218589	-0.0556215	-0.448219	-0.310508	0.0542964	0.298201	0.794568	0.99968	0.0955363	0.56574
NZ_CP011454.1	3530546	3530896	-	CDS	GEMMAAP_RS14905	WP_043579434.1	ferredoxin	5.50141	-0.103456	-0.183386	-0.218254	-0.185744	0.347028	0.187534	0.680825	0.526286	0.651467	0.99968	0.0736407	0.64621
NZ_CP011454.1	3892989	3894647	+	CDS	GEMMAAP_RS16455	WP_053333613.1	serine hydrolase	5.1027	0.0594698	-0.207954	-0.217847	0.109322	-0.263511	0.0944641	0.915123	0.36838	0.563248	0.99968	0.0695867	0.759431
NZ_CP011454.1	4022551	4024230	+	CDS	GEMMAAP_RS16955	WP_202969158.1	FAD-dependent oxidoreductase	6.1764	0.496508	0.435347	-0.217585	-0.143653	0.376232	-0.0370872	0.00915331	0.0514874	0.57529	0.99968	0.0203173	0.935404
NZ_CP011454.1	3980358	3981752	+	CDS	GEMMAAP_RS16800	WP_145979201.1	alginate export family protein	4.37402	0.0579219	0.153498	-0.217502	0.0275913	0.0157439	0.274047	0.932701	0.66865	0.691341	0.99968	0.949607	0.445611
NZ_CP011454.1	251432	252943	+	CDS	GEMMAAP_RS01080	WP_053333904.1	M20/M25/M40 family metallo-hydrolase	5.78038	0.30305	0.339456	-0.217219	0.129473	0.48906	-0.183339	0.187052	0.214392	0.686058	0.99968	0.013254	0.652394
NZ_CP011454.1	3369683	3370939	+	CDS	GEMMAAP_RS14295	WP_026848648.1	hypothetical protein	3.74227	-0.480787	-0.236199	-0.217022	-0.281505	0.0507864	0.206755	0.214262	0.716821	0.851663	0.99968	0.88824	0.748651
NZ_CP011454.1	1313848	1314708	+	CDS	GEMMAAP_RS20815	WP_145979018.1	hypothetical protein	6.98529	-0.640003	-0.70728	-0.216848	-0.210512	-0.337151	-0.551212	0.0571459	0.0736216	0.817464	0.99968	0.256682	0.270917
NZ_CP011454.1	1194504	1197395	+	CDS	GEMMAAP_RS04935	WP_158514740.1	DNA/RNA non-specific endonuclease	5.46126	0.0426634	0.0803524	-0.21541	-0.00784545	0.140796	-0.0412391	0.877905	0.80681	0.631855	0.99968	0.437636	0.994981
NZ_CP011454.1	422833	423909	-	CDS	GEMMAAP_RS01885	WP_145978953.1	hypothetical protein	0.844458	-0.924728	0.159498	-0.215139	-1.01699	-0.25155	-0.70816	0.247434	0.931439	0.95152	0.99968	0.600903	0.440494
NZ_CP011454.1	1481232	1484168	-	CDS	GEMMAAP_RS06110	WP_026850258.1	gamma-glutamyltransferase	5.53173	0.284648	0.282808	-0.215006	-0.146739	0.412108	0.0806029	0.208604	0.311925	0.676901	0.99968	0.0315125	0.862229
NZ_CP011454.1	1386276	1386959	-	CDS	GEMMAAP_RS05760	WP_026849865.1	hypothetical protein	7.65117	-3.51821	-2.22446	-0.214964	0.134283	-3.26878	-1.11258	0.0127022	0.128539	0.973029	0.99968	0.0072823	0.594288
NZ_CP011454.1	2531826	2532536	-	CDS	GEMMAAP_RS10780	WP_026849762.1	hypothetical protein	8.3019	-0.697875	-0.662704	-0.214778	-0.403276	0.124179	0.390328	0.222597	0.306726	0.913101	0.99968	0.835831	0.698542
NZ_CP011454.1	3195662	3196573	-	CDS	GEMMAAP_RS13520	WP_202969137.1	pseudouridine-5'-phosphate glycosidase	7.7069	0.0547655	0.170575	-0.214668	-0.0974101	-0.28339	0.289178	0.951778	0.529901	0.560456	0.99968	0.069325	0.270917
NZ_CP011454.1	1425591	1426094	+	CDS	GEMMAAP_RS05890	WP_026849845.1	hypothetical protein	4.67898	-0.257986	-0.149838	-0.2146	-0.161531	0.0614177	0.183713	0.314133	0.704211	0.723486	0.99968	0.906111	0.655851
NZ_CP011454.1	1400913	1401965	+	CDS	GEMMAAP_RS05815	WP_026849856.1	hypothetical protein	4.51803	0.14001	0.0460652	-0.214277	-0.0727482	-0.301681	0.191459	0.720782	0.953916	0.813224	0.99968	0.270462	0.728622
NZ_CP011454.1	3016144	3018582	+	CDS	GEMMAAP_RS12790	WP_053334048.1	hypothetical protein	4.91005	-0.734216	-0.617671	-0.214216	0.0749028	0.39198	0.248316	0.0250838	0.132082	0.825188	0.99968	0.125111	0.633993
NZ_CP011454.1	3771616	3772515	+	CDS	GEMMAAP_RS15945	WP_053333638.1	DUF58 domain-containing protein	5.33939	-0.284835	-0.451844	-0.213847	-0.236774	0.143254	-0.477688	0.347908	0.214942	0.794933	0.99968	0.598259	0.278858
NZ_CP011454.1	2802643	2804370	-	CDS	GEMMAAP_RS11905	WP_082821268.1	D-aminoacylase	6.88877	-0.270243	-0.0898489	-0.213733	-0.0163602	-0.0178278	-0.00190221	0.121999	0.729164	0.556697	0.99968	0.925994	0.998662
NZ_CP011454.1	3194375	3195541	-	CDS	GEMMAAP_RS13515	WP_026848768.1	tetratricopeptide repeat protein	8.27858	-0.179495	-0.146466	-0.213335	-0.127556	-0.464769	-0.0348335	0.387632	0.55409	0.61806	0.99968	0.0091602	0.947262
NZ_CP011454.1	3645982	3647334	+	CDS	GEMMAAP_RS15405	WP_053333662.1	AI-2E family transporter	5.93257	-0.0448736	0.0593416	-0.212851	-0.0385386	-0.180841	0.117022	0.848967	0.96378	0.563248	0.99968	0.229488	0.700306
NZ_CP011454.1	1266008	1267594	-	CDS	GEMMAAP_RS05305	WP_053334237.1	aromatic amino acid ammonia-lyase	4.21187	0.068581	-0.336699	-0.212295	-0.396799	0.217124	-0.345919	0.878253	0.450427	0.808932	0.99968	0.440338	0.51792
NZ_CP011454.1	4493338	4494387	+	CDS	GEMMAAP_RS18925	WP_026850975.1	hypothetical protein	3.85299	-0.0637314	-0.121742	-0.212284	0.234943	-0.674932	0.209611	0.895353	0.855688	0.838887	0.99968	0.00879922	0.674702
NZ_CP011454.1	8916	10331	+	CDS	GEMMAAP_RS00050	WP_082820929.1	GWxTD domain-containing protein	7.41877	-0.448802	-0.43282	-0.212212	-0.128021	-0.461054	-0.374397	0.0282052	0.0627966	0.643294	0.99968	0.011273	0.198152
NZ_CP011454.1	3185423	3185794	+	CDS	GEMMAAP_RS13475	WP_026848773.1	hypothetical protein	7.42131	-0.45439	-0.582062	-0.212078	-0.265367	0.0736929	-0.0435092	0.274612	0.21615	0.862985	0.99968	0.864741	0.975743
NZ_CP011454.1	255514	256326	-	CDS	GEMMAAP_RS01100	WP_026849083.1	histidinol-phosphatase	6.2743	0.207016	0.0853232	-0.211972	-0.0357177	0.647246	0.27422	0.388066	0.824562	0.689011	0.99968	0.00256774	0.474623
NZ_CP011454.1	1520628	1521230	-	CDS	GEMMAAP_RS06265	WP_026850281.1	prepilin-type N-terminal cleavage/methylation domain-containing protein	5.33512	0.212495	0.504378	-0.211947	-0.00382123	0.0210409	0.293733	0.446701	0.110599	0.741917	0.99968	0.941111	0.49069
NZ_CP011454.1	3617773	3618090	+	CDS	GEMMAAP_RS20640	WP_158514886.1	TonB-dependent receptor plug domain-containing protein	6.93198	1.08991	0.831688	-0.211708	-0.358135	0.150447	-0.128651	0.111583	0.31381	0.938926	0.99968	0.81699	0.931848
NZ_CP011454.1	247602	248999	+	CDS	GEMMAAP_RS01065	WP_026849077.1	insulinase family protein	6.45239	-0.155734	-0.0830345	-0.211687	-0.16697	0.091809	-0.229105	0.505744	0.813038	0.67387	0.99968	0.66398	0.526485
NZ_CP011454.1	450818	451129	+	CDS	GEMMAAP_RS01980	WP_202969181.1	BrnT family toxin	5.35275	-0.735059	-0.375523	-0.211566	-0.707759	-0.672749	0.296419	0.020591	0.349873	0.804856	0.99968	0.0101538	0.537339
NZ_CP011454.1	4209496	4210119	+	CDS	GEMMAAP_RS17745	WP_075071563.1	RNA polymerase sigma-70 factor	4.94215	0.024206	0.0749742	-0.21141	0.163265	0.496619	0.917911	0.990117	0.968768	0.948562	0.99968	0.411056	0.364644
NZ_CP011454.1	106159	106476	+	CDS	GEMMAAP_RS00440	WP_026848994.1	nucleotidyltransferase family protein	6.17093	-0.410084	-0.0511945	-0.211289	-0.254496	-0.123026	0.205503	0.0322954	0.891075	0.61806	0.99968	0.469881	0.49069
NZ_CP011454.1	4180257	4182497	+	CDS	GEMMAAP_RS17630	WP_026848164.1	catalase/peroxidase HPI	7.67824	0.335763	0.289413	-0.210881	-0.0310415	0.0737109	0.297045	0.100407	0.203061	0.637932	0.99968	0.717395	0.336647
NZ_CP011454.1	1356908	1357696	-	CDS	GEMMAAP_RS05660	WP_026849883.1	SGNH/GDSL hydrolase family protein	2.41795	-0.257763	-0.0925528	-0.21075	-0.177439	-0.490884	0.0406105	0.58849	0.928484	0.875159	0.99968	0.134896	0.992374
NZ_CP011454.1	3684891	3686048	-	CDS	GEMMAAP_RS15595	WP_053333653.1	glycosyltransferase family 2 protein	4.7949	0.224512	-0.111667	-0.209617	-0.0059954	-0.0718309	0.0911824	0.283871	0.787566	0.645068	0.99968	0.71905	0.816999
NZ_CP011454.1	703738	706077	+	CDS	GEMMAAP_RS03040	WP_053334000.1	PBP1A family penicillin-binding protein	8.5598	-0.690575	-0.565691	-0.20961	-0.414731	0.19366	-0.0956167	0.0581751	0.1544	0.838433	0.99968	0.572252	0.90868
NZ_CP011454.1	2512053	2513660	-	CDS	GEMMAAP_RS10710	WP_158514817.1	peptide ABC transporter substrate-binding protein	5.31877	-0.14822	0.159879	-0.209512	-0.2446	0.00842955	0.160959	0.477988	0.60645	0.635769	0.99968	0.968797	0.632346
NZ_CP011454.1	2939697	2940731	+	CDS	GEMMAAP_RS12475	WP_145979121.1	hypothetical protein	1.52344	-0.427083	-1.31441	-0.209493	-0.151498	0.0736769	0.201198	0.478802	0.142482	0.919249	0.99968	0.886551	0.84318
NZ_CP011454.1	1863459	1865267	+	CDS	GEMMAAP_RS07710	WP_026850499.1	DUF2723 domain-containing protein	7.80417	-0.443556	-0.357469	-0.209006	-0.224448	0.292465	-0.400303	0.0693807	0.186321	0.719077	0.99968	0.180804	0.275558
NZ_CP011454.1	3289829	3290266	-	CDS	GEMMAAP_RS13935	WP_026848701.1	hypothetical protein	6.50602	-0.0883785	-0.232266	-0.208353	0.0453943	-0.363418	0.0208005	0.703525	0.323707	0.631855	0.99968	0.0309197	0.975619
NZ_CP011454.1	1889147	1889317	+	CDS	GEMMAAP_RS20520	WP_158514774.1	hypothetical protein	6.54245	-0.193861	-0.26842	-0.208242	-0.105549	-0.240001	0.121994	0.467558	0.380501	0.740966	0.99968	0.270995	0.791115
NZ_CP011454.1	4273505	4274560	-	CDS	GEMMAAP_RS18020	WP_053333530.1	serine hydrolase	3.80143	0.190681	-0.174003	-0.208097	-0.0612028	0.283391	-0.164064	0.556192	0.720204	0.799034	0.99968	0.248425	0.759771
NZ_CP011454.1	4569411	4570787	-	CDS	GEMMAAP_RS19240	WP_026851023.1	cardiolipin synthase B	5.98682	-0.726412	-0.348115	-0.207949	-0.38382	-0.521961	0.210734	0.00735067	0.278573	0.752154	0.99968	0.0210308	0.640121
NZ_CP011454.1	3686109	3688010	-	CDS	GEMMAAP_RS15600	WP_026848462.1	hypothetical protein	5.03572	-0.284029	-0.141466	-0.207893	-0.14963	-0.344751	-0.0264443	0.15568	0.69196	0.636419	0.99968	0.0362936	0.960796
NZ_CP011454.1	1796913	1797503	-	CDS	GEMMAAP_RS07480	WP_053334385.1	DUF2911 domain-containing protein	6.55885	-0.440519	-0.635324	-0.207751	-0.2021	-0.386817	-0.375587	0.0765952	0.0354479	0.741917	0.99968	0.0749427	0.319233
NZ_CP011454.1	3404516	3404728	-	CDS	GEMMAAP_RS14430	WP_026848627.1	cold-shock protein	8.87645	0.128561	-0.282118	-0.207647	-0.13991	0.202793	0.329294	0.659176	0.315866	0.723505	0.99968	0.378147	0.389973
NZ_CP011454.1	4024752	4026071	-	CDS	GEMMAAP_RS16965	WP_026848256.1	CitMHS family transporter	5.71286	-0.206256	-0.066351	-0.207515	-0.0937729	0.0594678	0.244107	0.265483	0.971674	0.590082	0.99968	0.731771	0.349597
NZ_CP011454.1	2737602	2739101	+	CDS	GEMMAAP_RS11660	WP_026849638.1	amidase	4.49888	0.389684	0.304574	-0.206943	0.00870574	-0.312616	0.0376296	0.13172	0.363131	0.746625	0.99968	0.146259	0.954928
NZ_CP011454.1	3572889	3573599	-	CDS	GEMMAAP_RS15120	WP_026848528.1	TIGR00730 family Rossman fold protein	4.99271	-0.192832	-0.20246	-0.206931	-0.0361585	-0.539826	-0.39392	0.533691	0.625229	0.795505	0.99968	0.0250573	0.346165
NZ_CP011454.1	301883	302344	+	CDS	GEMMAAP_RS01345	WP_026849122.1	hypothetical protein	1.88677	0.191534	-0.37739	-0.206771	-0.0375659	0.704052	0.0974487	0.761871	0.690885	0.90846	0.99968	0.0820777	0.944205
NZ_CP011454.1	1975327	1976151	-	CDS	GEMMAAP_RS08185	WP_075071464.1	ABC transporter permease	4.71037	0.321831	0.260175	-0.206579	-0.064712	0.544533	0.0990277	0.133107	0.344791	0.655286	0.99968	0.00262162	0.79685
NZ_CP011454.1	1946674	1947873	+	CDS	GEMMAAP_RS08040	WP_202969207.1	bifunctional diaminohydroxyphosphoribosylaminopyrimidine deaminase/5-amino-6-(5-phosphoribosylamino)uracil reductase RibD	6.60266	-0.120376	0.0155272	-0.206549	0.0151706	0.16293	-0.371885	0.667267	0.976021	0.725497	0.99968	0.459408	0.296215
NZ_CP011454.1	4406587	4407756	+	CDS	GEMMAAP_RS18585	WP_053334587.1	histidinol-phosphate aminotransferase family protein	7.19154	0.0193225	0.264441	-0.206248	0.00232915	-0.12167	0.00549376	0.948488	0.201199	0.596399	0.99968	0.46305	0.994981
NZ_CP011454.1	57488	57895	+	CDS	GEMMAAP_RS00255	WP_158514665.1	hypothetical protein	5.70548	0.037153	0.0068783	-0.205951	-0.130729	-0.29746	0.175107	0.892564	0.990126	0.631855	0.99968	0.0599182	0.56802
NZ_CP011454.1	376135	377514	-	CDS	GEMMAAP_RS01655	WP_053333930.1	cytochrome c	6.514	0.0861651	-0.0860286	-0.205867	0.156055	-0.0755199	0.0114861	0.783835	0.846777	0.747479	0.99968	0.753675	0.992374
NZ_CP011454.1	3295837	3296211	+	CDS	GEMMAAP_RS20605	WP_026848696.1	copper homeostasis periplasmic binding protein CopC	3.31569	0.00620259	0.0719656	-0.205775	-0.130713	0.366285	0.0377162	0.995923	0.93511	0.849272	0.99968	0.233743	0.977484
NZ_CP011454.1	3704850	3705032	-	CDS	GEMMAAP_RS15685	WP_026848453.1	Flp family type IVb pilin	8.34961	-0.125258	-0.511385	-0.205369	-0.195771	-0.406049	-0.204157	0.743913	0.137944	0.813224	0.99968	0.146412	0.721543
NZ_CP011454.1	493882	494520	-	CDS	GEMMAAP_RS02140	WP_026849235.1	LON peptidase substrate-binding domain-containing protein	4.37465	-0.23189	-0.206779	-0.205193	-0.100332	-0.272587	0.11469	0.41182	0.605129	0.794442	0.99968	0.209109	0.809282
NZ_CP011454.1	1953249	1953650	+	CDS	GEMMAAP_RS08080	WP_026850557.1	hypothetical protein	7.15836	0.230301	0.17237	-0.205135	-0.0640592	0.155675	0.118349	0.117403	0.31381	0.477101	0.99968	0.229488	0.646991
NZ_CP011454.1	99385	101511	+	CDS	GEMMAAP_RS00415	WP_026848992.1	molybdopterin-dependent oxidoreductase	6.98488	0.20209	0.135149	-0.205053	-0.144232	-0.0180189	0.0376368	0.321265	0.610203	0.643332	0.99968	0.93389	0.938471
NZ_CP011454.1	267094	267438	+	CDS	GEMMAAP_RS01170	WP_145978936.1	hypothetical protein	2.48079	-0.106199	-0.351731	-0.204943	-0.13792	-0.416551	0.054942	0.864852	0.63602	0.889377	0.99968	0.410086	0.978756
NZ_CP011454.1	4349115	4350122	-	CDS	GEMMAAP_RS18330	WP_053334633.1	glycerophosphodiester phosphodiesterase	3.2929	-1.17456	-0.755845	-0.204858	-0.399235	-0.901077	-0.311147	0.102449	0.429658	0.948562	0.99968	0.141272	0.816999
NZ_CP011454.1	2402080	2403375	-	CDS	GEMMAAP_RS10200	WP_158514808.1	PD40 domain-containing protein	8.67058	-0.461129	-0.267066	-0.204735	-0.246259	-0.0519055	-0.16918	0.0254688	0.239979	0.645068	0.99968	0.810138	0.643738
NZ_CP011454.1	2007011	2007982	+	CDS	GEMMAAP_RS08330	WP_026850594.1	DUF58 domain-containing protein	6.9221	-0.32061	-0.11383	-0.204672	-0.241238	-0.495981	-0.466462	0.188231	0.755688	0.732913	0.99968	0.0210308	0.184712
NZ_CP011454.1	3629003	3630625	+	CDS	GEMMAAP_RS15335	WP_026848498.1	alpha-D-glucose phosphate-specific phosphoglucomutase	7.63752	-0.133544	0.133533	-0.204107	-0.0805737	0.245248	-0.0934053	0.620668	0.677115	0.711184	0.99968	0.240036	0.841035
NZ_CP011454.1	1838779	1840047	+	CDS	GEMMAAP_RS07625	WP_026850486.1	DUF4403 family protein	5.71054	-0.222667	0.0669431	-0.203789	-0.242263	0.341737	0.117376	0.262351	0.847993	0.643332	0.99968	0.0459489	0.752041
NZ_CP011454.1	1050038	1052458	+	CDS	GEMMAAP_RS04380	WP_202969215.1	ribonuclease H-like domain-containing protein	6.95599	0.279146	0.239483	-0.203593	-0.174603	0.120111	0.142061	0.138965	0.276231	0.61806	0.99968	0.491004	0.666269
NZ_CP011454.1	172249	173043	-	CDS	GEMMAAP_RS00770	WP_158514678.1	tetratricopeptide repeat protein	3.13766	-0.879674	-1.17539	-0.203467	-0.422917	0.0278469	-0.0188554	0.0169559	0.0261237	0.851663	0.99968	0.955423	0.990322
NZ_CP011454.1	1083876	1085720	+	CDS	GEMMAAP_RS04515	WP_026850072.1	hypothetical protein	5.5948	-0.0607335	0.0410941	-0.2034	-0.235151	-0.0119588	-0.00568529	0.770764	0.963995	0.56348	0.99968	0.947786	0.994981
NZ_CP011454.1	2934390	2935124	+	CDS	GEMMAAP_RS12445	WP_026849520.1	hypothetical protein	8.74032	-0.915991	-0.485672	-0.202931	-0.23606	0.226445	-0.144328	0.00583855	0.158869	0.81357	0.99968	0.4461	0.816835
NZ_CP011454.1	4524371	4524856	-	CDS	GEMMAAP_RS19040	WP_026850992.1	peptide-methionine (R)-S-oxide reductase MsrB	6.79899	-0.524252	-0.549543	-0.202794	-0.0908657	-0.131186	-0.284638	0.0297882	0.0515696	0.73471	0.99968	0.562252	0.46572
NZ_CP011454.1	1951967	1952278	+	CDS	GEMMAAP_RS08070	WP_026850555.1	HPF/RaiA family ribosome-associated protein	8.64867	-0.00282987	-0.109213	-0.202746	-0.205411	-0.149454	0.0284061	0.996133	0.730228	0.690193	0.99968	0.47857	0.966543
NZ_CP011454.1	662292	663587	+	CDS	GEMMAAP_RS02875	WP_043580192.1	MFS transporter	3.58808	-0.222248	-0.133653	-0.202072	0.0151388	0.608409	0.00388368	0.535744	0.973442	0.825188	0.99968	0.0226565	0.998662
NZ_CP011454.1	4286639	4288321	-	CDS	GEMMAAP_RS18075	WP_053333528.1	beta-N-acetylhexosaminidase	4.89788	-0.0181773	0.279153	-0.201956	-0.139422	-0.014127	0.0596812	0.951778	0.224672	0.615802	0.99968	0.985478	0.872568
NZ_CP011454.1	388909	389349	-	CDS	GEMMAAP_RS01730	WP_202969180.1	DUF5519 family protein	7.05817	-0.271229	-0.156226	-0.201854	-0.196064	0.419457	0.265909	0.167311	0.536492	0.635769	0.99968	0.0144211	0.368116
NZ_CP011454.1	3813994	3814473	-	CDS	GEMMAAP_RS16120	WP_179947316.1	RidA family protein	4.90426	0.114134	-0.00993044	-0.201838	-0.120734	-0.506903	0.00599576	0.664704	0.987047	0.718469	0.99968	0.00812778	0.996064
NZ_CP011454.1	1755249	1755752	+	CDS	GEMMAAP_RS07285	WP_026850437.1	DNA starvation/stationary phase protection protein Dps	5.70497	-2.58991	-1.42555	-0.201569	-0.1385	-2.485	-0.970664	0.000285339	0.0513389	0.927216	0.99968	3.03153e-05	0.179617
NZ_CP011454.1	4597995	4599473	+	CDS	GEMMAAP_RS19345	WP_026848844.1	type VI secretion system contractile sheath large subunit	7.50946	0.12149	-0.00288386	-0.201468	0.0159743	-0.0576739	-0.0774263	0.615413	0.996048	0.676901	0.99968	0.790031	0.855781
NZ_CP011454.1	661053	662207	-	CDS	GEMMAAP_RS02870	WP_026849345.1	hypothetical protein	5.98255	-0.229765	-0.238742	-0.201202	0.150395	-0.48882	-0.169509	0.295747	0.37412	0.691681	0.99968	0.00885785	0.646991
NZ_CP011454.1	190165	190542	+	CDS	GEMMAAP_RS00835	WP_026849042.1	DUF2384 domain-containing protein	3.69911	0.0450403	-0.234463	-0.201149	-0.135303	0.167315	0.280369	0.923927	0.630238	0.81357	0.99968	0.515673	0.550035
NZ_CP011454.1	1267635	1268468	+	CDS	GEMMAAP_RS20500	WP_158514742.1	hypothetical protein	5.33363	0.0389895	-0.0887481	-0.200989	-0.221849	-0.665016	0.123859	0.974913	0.789347	0.651624	0.99968	0.000287592	0.709508
NZ_CP011454.1	1631747	1633354	+	CDS	GEMMAAP_RS06775	WP_082821126.1	D-aminoacylase	7.10131	-0.234244	-0.122106	-0.20085	-0.0351742	-0.238792	0.109508	0.343291	0.728268	0.724721	0.99968	0.255548	0.809282
NZ_CP011454.1	1517512	1518024	-	CDS	GEMMAAP_RS06245	WP_043581329.1	hypothetical protein	4.54944	-0.104936	0.193971	-0.200717	0.0205796	0.451033	0.153142	0.720782	0.572106	0.741917	0.99968	0.0281311	0.726158
NZ_CP011454.1	107895	110201	+	CDS	GEMMAAP_RS00455	WP_026848997.1	TonB-dependent receptor	5.16842	-0.229625	-0.112478	-0.20045	-0.156631	-0.0151045	0.181438	0.267926	0.729164	0.665748	0.99968	0.943971	0.587905
NZ_CP011454.1	3460645	3462792	-	CDS	GEMMAAP_RS14665	WP_053333699.1	serine/threonine protein kinase	8.80316	-0.178435	-0.132736	-0.200439	-0.0537675	0.111579	0.0118109	0.325536	0.542365	0.580675	0.99968	0.503376	0.988168
NZ_CP011454.1	1539061	1540341	+	CDS	GEMMAAP_RS06380	WP_043581333.1	competence/damage-inducible protein A	6.94462	-0.66486	-0.244068	-0.200311	-0.273035	0.167884	-0.138749	0.00485565	0.36163	0.707498	0.99968	0.419467	0.733054
NZ_CP011454.1	4026212	4027369	+	CDS	GEMMAAP_RS16970	WP_026848255.1	ABC transporter substrate-binding protein	3.84328	-0.325854	-0.123258	-0.200291	-0.0596666	0.0128717	0.173856	0.24853	0.800539	0.797677	0.99968	0.984491	0.722829
NZ_CP011454.1	44193	44483	+	CDS	GEMMAAP_RS00185	WP_026848955.1	hypothetical protein	4.03361	-0.666745	-0.838503	-0.2002	-0.425865	-0.535824	0.140852	0.0736096	0.0995461	0.866733	0.99968	0.0512855	0.815215
NZ_CP011454.1	3190630	3193296	-	CDS	GEMMAAP_RS13505	WP_026848770.1	insulinase family protein	8.05403	-0.140146	0.202053	-0.199978	-0.307669	0.16376	0.06957	0.50215	0.362733	0.635769	0.99968	0.350124	0.862229
NZ_CP011454.1	1453770	1454876	+	CDS	GEMMAAP_RS06000	WP_158514751.1	tetratricopeptide repeat protein	5.73298	0.0487467	0.167539	-0.199972	-0.0611927	0.187948	0.110574	0.854656	0.521142	0.652327	0.99968	0.277027	0.759771
NZ_CP011454.1	667249	667848	+	CDS	GEMMAAP_RS02890	WP_026849348.1	hypothetical protein	4.05878	-0.465217	-0.45401	-0.199965	-0.068288	-0.353408	-0.350747	0.144291	0.273397	0.829258	0.99968	0.179118	0.478289
NZ_CP011454.1	3723085	3723984	-	CDS	GEMMAAP_RS15775	WP_026848438.1	deoxyribonuclease IV	5.30759	-0.0444249	-0.0796772	-0.199878	-0.0635929	-0.222312	-0.0813877	0.991237	0.953916	0.719077	0.99968	0.267783	0.865126
NZ_CP011454.1	1566695	1570522	+	CDS	GEMMAAP_RS06505	WP_202969198.1	magnesium chelatase subunit H	8.69267	0.236869	0.188508	-0.199796	-0.0111891	0.915673	0.208272	0.185537	0.350467	0.586457	0.99968	4.17186e-06	0.471608
NZ_CP011454.1	4217738	4218271	+	CDS	GEMMAAP_RS17785	WP_026848143.1	hypothetical protein	4.81258	-0.16914	-0.233582	-0.199586	-0.333378	-0.140083	0.22668	0.392979	0.348176	0.629481	0.99968	0.387649	0.411031
NZ_CP011454.1	2278428	2278688	-	CDS	GEMMAAP_RS09625	WP_026850731.1	30S ribosomal protein S15	8.51609	-0.120609	-0.306628	-0.19937	0.0911008	-0.10912	0.183038	0.778008	0.452162	0.837476	0.99968	0.754374	0.771957
NZ_CP011454.1	2370823	2373744	-	CDS	GEMMAAP_RS10090	WP_026850664.1	TonB-dependent receptor	7.08793	-0.359678	-0.170775	-0.198601	0.0877889	0.324479	-0.135788	0.10767	0.550154	0.707498	0.99968	0.0937596	0.731111
NZ_CP011454.1	4389345	4390610	+	CDS	GEMMAAP_RS18500	WP_082821482.1	FecR domain-containing protein	7.72921	-3.14774	-2.04296	-0.198598	-0.353644	-3.20769	-1.41703	0.00024606	0.0156604	0.938926	0.99968	3.12732e-05	0.115174
NZ_CP011454.1	2527424	2528029	+	CDS	GEMMAAP_RS10765	WP_026849764.1	DUF502 domain-containing protein	6.80789	-0.342814	-0.245807	-0.19768	-0.219631	-0.417246	0.0703497	0.0537985	0.235859	0.609542	0.99968	0.0081802	0.840432
NZ_CP011454.1	3715726	3717255	-	CDS	GEMMAAP_RS15740	WP_043579397.1	hypothetical protein	6.03384	0.179196	0.254579	-0.197663	0.109018	0.438789	-0.0308193	0.417599	0.315471	0.689011	0.99968	0.0169391	0.959408
NZ_CP011454.1	3593424	3593798	+	CDS	GEMMAAP_RS15190	WP_075071689.1	metalloregulator ArsR/SmtB family transcription factor	5.70939	-0.567387	-0.497074	-0.196825	0.039257	0.0639589	0.0257176	0.0571459	0.1703	0.817464	0.99968	0.830598	0.980408
NZ_CP011454.1	1506673	1508712	-	CDS	GEMMAAP_RS06210	WP_026850272.1	Ig-like domain-containing protein	6.24981	0.0838159	0.149825	-0.196401	-0.220024	-0.347288	0.157461	0.710283	0.548467	0.643332	0.99968	0.0327518	0.630349
NZ_CP011454.1	3998698	4002570	+	CDS	GEMMAAP_RS16890	WP_026848268.1	hypothetical protein	5.58015	-0.060484	-0.228186	-0.195872	0.00976778	0.395881	0.127182	0.817517	0.478302	0.686058	0.99968	0.0233401	0.726411
NZ_CP011454.1	1699554	1700474	-	CDS	GEMMAAP_RS07055	WP_202969217.1	ROK family protein	3.82562	0.0343003	-0.287178	-0.195843	0.0127775	-0.748743	0.126054	0.946296	0.508955	0.825188	0.99968	0.00454469	0.817825
NZ_CP011454.1	290778	291551	+	CDS	GEMMAAP_RS01290	WP_043580389.1	fatty acid desaturase	7.42806	0.152445	0.0988637	-0.19574	-0.0764129	0.327721	0.253793	0.490722	0.743422	0.672897	0.99968	0.0673654	0.424308
NZ_CP011454.1	3706625	3708400	-	CDS	GEMMAAP_RS15700	WP_053333647.1	serine/threonine protein kinase	6.46585	-0.268114	-0.0993111	-0.195159	-0.230488	0.033269	0.0324731	0.222619	0.770164	0.718278	0.99968	0.88296	0.955293
NZ_CP011454.1	4623866	4624597	-	CDS	GEMMAAP_RS19440	WP_075071582.1	hypothetical protein	6.27059	-0.0911267	0.122524	-0.194812	-0.0817807	-0.11722	0.163781	0.648323	0.607371	0.59311	0.99968	0.43436	0.547246
NZ_CP011454.1	3610102	3611541	-	CDS	GEMMAAP_RS15255	WP_026848507.1	NAD-dependent succinate-semialdehyde dehydrogenase	4.77143	0.427056	0.327219	-0.194802	-0.0599091	0.154573	0.15125	0.0628951	0.26112	0.722008	0.99968	0.433361	0.698576
NZ_CP011454.1	151023	151514	+	CDS	GEMMAAP_RS00675	WP_043580318.1	DUF4440 domain-containing protein	5.49586	-0.643785	-0.865634	-0.194801	-0.210416	0.502812	-0.0052313	0.0350146	0.0306874	0.825188	0.99968	0.0498937	0.997053
NZ_CP011454.1	2255877	2256329	+	CDS	GEMMAAP_RS09535	WP_053334506.1	PTS sugar transporter subunit IIA	7.40805	-0.00601126	0.114549	-0.194068	-0.164731	0.36548	0.226637	0.992042	0.728268	0.722008	0.99968	0.0670232	0.550035
NZ_CP011454.1	2066558	2067031	+	CDS	GEMMAAP_RS08605	WP_053334444.1	acyl-CoA thioesterase	4.06646	-0.031503	0.107491	-0.193619	-0.218297	-0.625917	0.0289167	0.952174	0.867949	0.84074	0.99968	0.0180991	0.97867
NZ_CP011454.1	986623	987201	+	CDS	GEMMAAP_RS04110	WP_026850130.1	HNH endonuclease	8.16111	0.231834	0.291957	-0.193228	-0.129148	0.162858	-0.0316761	0.153077	0.103897	0.558547	0.99968	0.256247	0.935404
NZ_CP011454.1	2071254	2071925	+	CDS	GEMMAAP_RS08645	WP_202969210.1	hypothetical protein	6.92646	-0.22143	-0.0838697	-0.192959	-0.308936	-0.141178	0.10772	0.337582	0.815331	0.719077	0.99968	0.497125	0.798366
NZ_CP011454.1	3984177	3985802	-	CDS	GEMMAAP_RS16825	WP_026848279.1	AMP-binding protein	4.92797	0.256719	0.184699	-0.192642	0.0617124	0.950372	0.233113	0.307075	0.591438	0.759414	0.99968	8.84414e-05	0.655851
NZ_CP011454.1	3397244	3399682	+	CDS	GEMMAAP_RS14410	WP_026848630.1	TonB-dependent receptor	3.6776	-0.155405	-0.247799	-0.192587	0.0684819	0.051807	-0.00829503	0.720636	0.667451	0.869221	0.99968	0.877573	0.996345
NZ_CP011454.1	85344	86135	+	CDS	GEMMAAP_RS00360	WP_145978922.1	hypothetical protein	7.47579	-0.791511	-0.807919	-0.192579	0.05134	-1.06772	-0.572396	0.00102712	0.00712892	0.721006	0.99968	9.61032e-06	0.0524164
NZ_CP011454.1	3525204	3526316	+	CDS	GEMMAAP_RS14875	WP_158514880.1	hypothetical protein	6.56255	-0.234588	-0.571668	-0.19205	-0.0657912	-0.0964774	0.161002	0.680602	0.334372	0.911743	0.99968	0.858338	0.883891
NZ_CP011454.1	985030	986403	+	CDS	GEMMAAP_RS04105	WP_026850131.1	amidohydrolase family protein	6.38868	-0.0836131	0.0761008	-0.192023	-0.110379	0.282736	0.115306	0.769689	0.853883	0.737441	0.99968	0.161311	0.791927
NZ_CP011454.1	96114	97991	-	CDS	GEMMAAP_RS00395	WP_043580073.1	CocE/NonD family hydrolase	5.16538	0.201983	0.243656	-0.191994	0.004479	0.36923	0.160529	0.38901	0.393133	0.725053	0.99968	0.0473636	0.690847
NZ_CP011454.1	1571468	1572268	+	CDS	GEMMAAP_RS06515	WP_082821113.1	magnesium protoporphyrin IX methyltransferase	7.4123	0.180839	0.115916	-0.191667	0.0859968	0.589713	-0.0183037	0.348571	0.641768	0.643332	0.99968	0.000875116	0.97867
NZ_CP011454.1	4084287	4084976	+	CDS	GEMMAAP_RS17225	WP_145979210.1	hypothetical protein	4.48788	0.521662	0.521707	-0.191587	-0.157753	-0.109244	0.251919	0.0348731	0.0925297	0.759955	0.99968	0.614381	0.500721
NZ_CP011454.1	2745681	2746709	+	CDS	GEMMAAP_RS11695	WP_043580685.1	sugar ABC transporter substrate-binding protein	4.56003	0.0544578	0.0678083	-0.191193	0.0684442	-0.273945	0.0206994	0.870991	0.862223	0.711184	0.99968	0.121485	0.978119
NZ_CP011454.1	4216120	4216551	+	CDS	GEMMAAP_RS17770	WP_026848146.1	DUF4281 domain-containing protein	3.58938	-0.786834	-1.07906	-0.191106	-0.271919	0.252157	-0.0515396	0.0336467	0.0427292	0.869221	0.99968	0.394238	0.954928
NZ_CP011454.1	4630895	4633846	-	CDS	GEMMAAP_RS19475	WP_145979252.1	hypothetical protein	6.0779	-0.0768187	0.19311	-0.190719	-0.0439247	-0.169036	0.253975	0.785443	0.511441	0.724298	0.99968	0.400388	0.473082
NZ_CP011454.1	4387014	4388477	-	CDS	GEMMAAP_RS18490	WP_026850912.1	DUF839 domain-containing protein	3.53652	-0.260059	0.0697418	-0.190679	-0.434846	-0.220013	0.366388	0.503489	0.933572	0.853372	0.99968	0.435739	0.457735
NZ_CP011454.1	2571932	2573965	-	CDS	GEMMAAP_RS10940	WP_026849739.1	glycoside hydrolase family 97 protein	5.24652	-0.120431	-0.0396953	-0.190655	-0.118811	0.0833794	0.163958	0.764588	0.932631	0.701569	0.99968	0.674322	0.649919
NZ_CP011454.1	3014274	3015806	-	CDS	GEMMAAP_RS12785	WP_026849466.1	two-component sensor histidine kinase	5.70443	0.122645	-0.303921	-0.190553	-0.128171	-0.387872	-0.0419854	0.582591	0.214942	0.690193	0.99968	0.0237939	0.928109
NZ_CP011454.1	3547335	3547970	-	CDS	GEMMAAP_RS14995	WP_043579430.1	phosphatase PAP2 family protein	4.99449	-0.188569	-0.24882	-0.190511	-0.144072	-0.708604	0.0825826	0.510304	0.499778	0.790425	0.99968	0.00244499	0.875631
NZ_CP011454.1	4008605	4011004	-	CDS	GEMMAAP_RS16915	WP_053333586.1	response regulator	6.05588	0.0902081	-0.00509724	-0.190345	-0.0685887	0.431844	0.184026	0.706657	0.992522	0.686058	0.99968	0.0138364	0.594511
NZ_CP011454.1	265998	266594	+	CDS	GEMMAAP_RS01160	WP_043580110.1	HD domain-containing protein	6.46051	-0.0844236	-0.177429	-0.18991	-0.0208764	-0.135239	-0.11616	0.602213	0.332919	0.507517	0.99968	0.288481	0.647911
NZ_CP011454.1	1896644	1898053	+	CDS	GEMMAAP_RS07855	WP_053334409.1	UDP-N-acetylmuramoyl-tripeptide--D-alanyl-D-alanine ligase	6.76284	0.173283	0.330215	-0.189783	-0.0506155	0.600211	0.10742	0.335555	0.0986808	0.623881	0.99968	0.000365224	0.728674
NZ_CP011454.1	419949	421187	-	CDS	GEMMAAP_RS01875	WP_082820982.1	GAF domain-containing protein	5.91627	0.0250033	0.0862506	-0.189761	-0.154446	-0.149455	-0.0229011	0.937086	0.799557	0.700432	0.99968	0.397573	0.970223
NZ_CP011454.1	1745970	1747643	+	CDS	GEMMAAP_RS07250	WP_145979040.1	hypothetical protein	6.75873	-0.367997	-0.151196	-0.189587	-0.23577	0.352774	-0.337096	0.201282	0.720204	0.813224	0.99968	0.16591	0.477367
NZ_CP011454.1	389750	391972	-	CDS	GEMMAAP_RS01735	WP_026849178.1	glutamine synthetase III	6.8997	0.605054	0.47588	-0.189453	0.263986	0.233561	0.219787	0.00475779	0.0498473	0.68993	0.99968	0.182048	0.493589
NZ_CP011454.1	3799339	3799989	+	CDS	GEMMAAP_RS16045	WP_145979179.1	GAF domain-containing protein	5.38811	-0.304197	-0.365831	-0.189361	-0.323277	-0.729207	0.0294264	0.151866	0.155014	0.716029	0.99968	0.000287592	0.959025
NZ_CP011454.1	3436994	3437707	-	CDS	GEMMAAP_RS14560	WP_026848606.1	dienelactone hydrolase family protein	5.41897	0.0599269	0.157046	-0.189155	0.0421587	-0.288923	0.0104424	0.83726	0.617394	0.733172	0.99968	0.121621	0.992374
NZ_CP011454.1	4281683	4282156	-	CDS	GEMMAAP_RS18055	WP_026848099.1	nuclear transport factor 2 family protein	4.49514	-0.25649	-0.263298	-0.188235	-0.326399	-0.369828	0.0276163	0.3086	0.426679	0.785972	0.99968	0.0659999	0.996345
NZ_CP011454.1	2482322	2483842	-	CDS	GEMMAAP_RS10590	WP_053334171.1	PAS domain-containing protein	7.04446	0.11884	-0.119846	-0.188188	-0.0134996	0.316191	0.133325	0.556659	0.628306	0.705659	0.99968	0.0447788	0.673593
NZ_CP011454.1	1518623	1519741	-	CDS	GEMMAAP_RS06255	WP_026850279.1	PilN domain-containing protein	5.65675	0.178864	0.427689	-0.188165	0.038759	0.244942	0.257375	0.447146	0.108511	0.729929	0.99968	0.199546	0.46572
NZ_CP011454.1	4033104	4034876	+	CDS	GEMMAAP_RS17005	WP_043579633.1	ABC transporter ATP-binding protein/permease	5.99976	-0.0861822	-0.0737103	-0.188053	-0.0368976	-0.231902	0.122274	0.7205	0.951335	0.686058	0.99968	0.167417	0.72303
NZ_CP011454.1	2399726	2400490	-	CDS	GEMMAAP_RS10185	WP_075071482.1	twin-arginine translocase subunit TatC	6.73717	-0.119987	-0.327897	-0.18786	-0.170708	-0.0697694	-0.451856	0.74688	0.36648	0.832816	0.99968	0.8303	0.339988
NZ_CP011454.1	2020203	2021834	+	CDS	GEMMAAP_RS08385	WP_026850602.1	chaperonin GroEL	8.2915	-0.27479	-0.26317	-0.187847	0.29987	-0.259095	-0.330576	0.234886	0.308527	0.732433	0.99968	0.20841	0.346075
NZ_CP011454.1	1159070	1160137	+	CDS	GEMMAAP_RS04780	WP_026850028.1	hypothetical protein	5.21707	-0.0399902	0.0806287	-0.187527	0.107344	-0.706235	0.274439	0.923927	0.878999	0.813224	0.99968	0.00285283	0.510624
NZ_CP011454.1	2949035	2949694	-	CDS	GEMMAAP_RS12520	WP_026849507.1	hypothetical protein	5.89603	-0.444694	-0.0923313	-0.18711	-0.164883	0.189228	0.0182056	0.328255	0.923216	0.897281	0.99968	0.638024	0.993477
NZ_CP011454.1	1922492	1923667	+	CDS	GEMMAAP_RS07940	WP_026850531.1	alanine racemase	7.97745	-0.958105	-0.490456	-0.186947	-0.470692	-0.0499943	-0.295186	0.0768394	0.442013	0.919548	0.99968	0.932839	0.761491
NZ_CP011454.1	1173716	1174474	-	CDS	GEMMAAP_RS04840	WP_026850017.1	ParA family protein	8.2695	-0.288376	-0.285721	-0.186878	-0.125292	-0.342672	-0.0934976	0.223119	0.279299	0.741162	0.99968	0.0991468	0.841035
NZ_CP011454.1	4573464	4574711	-	CDS	GEMMAAP_RS19260	WP_053334627.1	hypothetical protein	5.2462	0.310545	0.624345	-0.1868	-0.0610236	0.331342	0.412225	0.217701	0.0428619	0.764711	0.99968	0.116337	0.251222
NZ_CP011454.1	799420	800289	-	CDS	GEMMAAP_RS03410	WP_026850233.1	alpha/beta hydrolase	5.19478	-0.188903	-0.101415	-0.186584	-0.300638	-0.00237691	0.115004	0.425079	0.783576	0.809272	0.99968	0.992397	0.777978
NZ_CP011454.1	3020670	3022235	+	CDS	GEMMAAP_RS12805	WP_202969130.1	MFS transporter	4.44088	-0.273473	-0.212909	-0.186196	-0.147901	0.0864715	-0.220787	0.190783	0.530122	0.716029	0.99968	0.654123	0.51792
NZ_CP011454.1	4291928	4292389	+	CDS	GEMMAAP_RS18085	WP_053333526.1	cytochrome c	1.96025	0.431842	-0.249651	-0.186177	0.411134	-0.0625035	-0.452662	0.460191	0.833728	0.925463	0.99968	0.897311	0.60463
NZ_CP011454.1	2841808	2843346	+	CDS	GEMMAAP_RS12050	WP_053334089.1	Do family serine endopeptidase	9.55387	-0.619493	-0.564788	-0.186116	-0.324743	-0.37295	-1.05667	0.108941	0.173406	0.870772	0.99968	0.280926	0.0436619
NZ_CP011454.1	4422165	4424027	-	CDS	GEMMAAP_RS18630	WP_082821490.1	response regulator	5.29775	0.0896779	0.0898497	-0.185715	0.0173138	0.638618	0.302476	0.64816	0.733052	0.615802	0.99968	0.00010861	0.20754
NZ_CP011454.1	2201749	2202303	-	CDS	GEMMAAP_RS09290	WP_026850779.1	RNA polymerase sigma factor	7.62666	-0.360693	-0.420734	-0.185695	-0.32504	-0.0321708	0.0645225	0.53607	0.528448	0.92056	0.99968	0.958306	0.970223
NZ_CP011454.1	4050849	4052525	-	CDS	GEMMAAP_RS17085	WP_026848243.1	ankyrin repeat domain-containing protein	7.13438	-0.270842	-0.00970648	-0.185597	-0.0990722	-0.171767	0.257907	0.251396	0.986352	0.751381	0.99968	0.414132	0.483607
NZ_CP011454.1	2450347	2450892	-	CDS	GEMMAAP_RS10415	WP_145979090.1	hypothetical protein	6.95553	0.181273	0.158295	-0.185288	0.0987292	-0.440942	0.0317397	0.324559	0.479481	0.639724	0.99968	0.00603904	0.946908
NZ_CP011454.1	373962	375077	-	CDS	GEMMAAP_RS01645	WP_043580138.1	saccharopine dehydrogenase NADP-binding domain-containing protein	4.63522	0.108821	0.0785157	-0.185051	0.0958743	-0.261396	0.168799	0.71069	0.919334	0.785961	0.99968	0.174352	0.659863
NZ_CP011454.1	1332663	1333217	+	CDS	GEMMAAP_RS05575	WP_043581038.1	hypothetical protein	2.39702	-0.188437	-0.418677	-0.184976	-0.496621	0.0501755	-0.0689033	0.679385	0.474844	0.88741	0.99968	0.965512	0.947192
NZ_CP011454.1	3037571	3037999	-	CDS	GEMMAAP_RS12855	WP_026849456.1	DUF494 family protein	6.68716	-0.347882	-0.0636368	-0.184558	-0.102626	0.0463675	0.0449627	0.0314729	0.805051	0.59311	0.99968	0.800944	0.901509
NZ_CP011454.1	743674	745389	-	CDS	GEMMAAP_RS03220	WP_026849398.1	methyl-accepting chemotaxis protein	5.6437	-0.120967	-0.132706	-0.184404	-0.0951242	0.377497	0.103173	0.672998	0.730026	0.780174	0.99968	0.0780814	0.834103
NZ_CP011454.1	4485820	4486068	-	CDS	GEMMAAP_RS18900	WP_026850972.1	hypothetical protein	3.70909	0.111862	0.366334	-0.183617	0.0738587	-0.123759	-0.0581901	0.752224	0.321661	0.81357	0.99968	0.612326	0.925428
NZ_CP011454.1	2476141	2476542	-	CDS	GEMMAAP_RS10555	WP_158514813.1	biopolymer transporter ExbD	8.65269	0.229918	-0.0106087	-0.182948	-0.0926839	0.11294	-0.524608	0.552273	0.990126	0.856599	0.99968	0.75143	0.329889
NZ_CP011454.1	952249	953061	-	CDS	GEMMAAP_RS03955	WP_026850154.1	prolipoprotein diacylglyceryl transferase	6.33971	-0.204414	-0.195392	-0.182217	-0.17404	0.0475797	0.087776	0.300226	0.419269	0.887417	0.99968	0.813094	0.8133
NZ_CP011454.1	1378870	1379832	+	CDS	GEMMAAP_RS05730	WP_026849871.1	hypothetical protein	4.85686	-0.21467	-0.284586	-0.181806	-0.117745	-0.573059	-0.182019	0.487091	0.465534	0.825188	0.99968	0.0199602	0.721543
NZ_CP011454.1	4390617	4391384	-	CDS	GEMMAAP_RS18505	WP_026850914.1	L%2CD-transpeptidase	2.17771	-0.670143	-0.612372	-0.181452	-0.0733269	0.0126802	-0.564333	0.20071	0.434302	0.927693	0.99968	0.979504	0.505545
NZ_CP011454.1	3958118	3958603	-	CDS	GEMMAAP_RS16705	WP_026848296.1	DUF6174 domain-containing protein	9.66345	2.09513	0.994736	-0.181249	-0.920106	0.731435	0.165085	0.00719409	0.206303	0.953012	0.99968	0.246471	0.919065
NZ_CP011454.1	4266219	4268057	-	CDS	GEMMAAP_RS17985	WP_026848110.1	hypothetical protein	6.67102	0.0859441	0.177579	-0.180997	0.0718587	0.287584	-0.202973	0.79715	0.617394	0.799949	0.99968	0.20545	0.65643
NZ_CP011454.1	1814726	1817026	+	CDS	GEMMAAP_RS07545	WP_026850473.1	S9 family peptidase	6.83571	0.35948	0.756758	-0.180861	-0.0150851	-0.0531114	0.209254	0.15946	0.0167026	0.797677	0.99968	0.843053	0.637095
NZ_CP011454.1	2446968	2448356	-	CDS	GEMMAAP_RS10395	WP_026849817.1	hypothetical protein	6.75978	0.02563	0.0183809	-0.180677	-0.247221	0.174375	0.103845	0.929863	0.959006	0.603418	0.99968	0.224112	0.724304
NZ_CP011454.1	3243455	3244228	+	CDS	GEMMAAP_RS13730	WP_053333747.1	DUF1028 domain-containing protein	5.44277	-0.208694	0.101168	-0.180491	-0.176018	-0.129885	0.0899681	0.648227	0.899612	0.88741	0.99968	0.724797	0.916712
NZ_CP011454.1	211416	211688	-	CDS	GEMMAAP_RS00915	WP_026849055.1	metal-binding protein	5.38351	-0.137827	0.207449	-0.180319	-0.13798	0.269514	0.22669	0.691642	0.617394	0.819424	0.99968	0.278366	0.648177
NZ_CP011454.1	3597521	3599143	-	CDS	GEMMAAP_RS15215	WP_202969147.1	gamma-glutamyltransferase	5.44402	0.566113	0.380124	-0.180186	-0.00902655	0.0359177	0.148144	0.00505539	0.103281	0.68993	0.99968	0.857209	0.659705
NZ_CP011454.1	4696427	4697737	-	CDS	GEMMAAP_RS19800	WP_026848917.1	insulinase family protein	6.41495	-0.147644	-0.140684	-0.18002	-0.036309	-0.0832687	0.0908024	0.335555	0.463929	0.561303	0.99968	0.53829	0.884019
NZ_CP011454.1	338628	339611	-	CDS	GEMMAAP_RS01495	WP_026849146.1	Ig-like domain-containing protein	10.0348	1.24326	0.274895	-0.179706	-0.752846	0.505877	-0.0672488	0.0509002	0.757376	0.94412	0.99968	0.371052	0.975619
NZ_CP011454.1	3896345	3898030	+	CDS	GEMMAAP_RS16470	WP_026848330.1	dihydroxy-acid dehydratase	5.42019	0.309747	0.575581	-0.179157	0.0797361	0.559938	0.260493	0.0823402	0.0138828	0.646602	0.99968	0.000698846	0.33686
NZ_CP011454.1	4661416	4661889	-	CDS	GEMMAAP_RS19630	WP_026848891.1	GNAT family N-acetyltransferase	3.83114	0.552752	0.258822	-0.179046	-0.0987436	0.0697403	-0.159993	0.0567289	0.532186	0.838433	0.99968	0.820489	0.781294
NZ_CP011454.1	3258398	3259708	+	CDS	GEMMAAP_RS13790	WP_075071528.1	amidohydrolase family protein	5.10142	-0.120078	-0.328996	-0.178607	-0.101761	-0.284584	-0.138744	0.629418	0.224889	0.735103	0.99968	0.105795	0.701479
NZ_CP011454.1	2505388	2506188	-	CDS	GEMMAAP_RS10685	WP_026849777.1	hypothetical protein	5.06083	-0.0399104	0.0733381	-0.178543	-0.0245761	0.0600921	0.11593	0.899665	0.853918	0.741162	0.99968	0.776904	0.76256
NZ_CP011454.1	2731906	2733873	-	CDS	GEMMAAP_RS11645	WP_202969120.1	DUF885 family protein	5.58953	0.0825784	0.251478	-0.17829	-0.121611	-0.00708866	0.0472488	0.760016	0.356011	0.739684	0.99968	0.97583	0.927038
NZ_CP011454.1	1538486	1538884	-	CDS	GEMMAAP_RS06375	WP_026850298.1	GxxExxY protein	2.15583	0.345902	-0.013489	-0.177885	-0.241855	-0.567181	0.22975	0.535515	0.992838	0.927877	0.99968	0.186393	0.802935
NZ_CP011454.1	1541137	1542282	+	CDS	GEMMAAP_RS06390	WP_026850299.1	J domain-containing protein	8.31002	-0.749178	-0.559151	-0.177555	-0.28484	-0.0495622	-0.369132	0.011592	0.0863262	0.825188	0.99968	0.872235	0.416782
NZ_CP011454.1	1322619	1324550	+	CDS	GEMMAAP_RS05550	WP_158514747.1	N-acetylmuramoyl-L-alanine amidase	5.87281	-0.199557	-0.0588082	-0.177165	-0.011071	-0.212566	-0.0616366	0.303071	0.870119	0.69094	0.99968	0.187997	0.926352
NZ_CP011454.1	46502	47749	+	CDS	GEMMAAP_RS00200	WP_026848958.1	dicarboxylate/amino acid:cation symporter	5.23212	-0.516372	-0.442782	-0.1769	0.00927087	-0.0773901	0.144403	0.00969414	0.0723094	0.707498	0.99968	0.674634	0.666269
NZ_CP011454.1	1853895	1854383	-	CDS	GEMMAAP_RS07665	WP_075071459.1	DUF4442 domain-containing protein	4.27048	-0.496776	-0.316858	-0.176728	0.143016	-0.0766261	0.00758663	0.0543674	0.355896	0.813224	0.99968	0.744807	0.994981
NZ_CP011454.1	210033	211079	+	CDS	GEMMAAP_RS00910	WP_053333896.1	membrane dipeptidase	5.37066	0.360688	0.401415	-0.176607	0.166043	0.731359	0.355956	0.0886734	0.113281	0.735103	0.99968	0.000228246	0.226854
NZ_CP011454.1	2018073	2018882	+	CDS	GEMMAAP_RS08370	WP_026850600.1	undecaprenyl-diphosphatase UppP	5.78745	0.0893485	-0.0742917	-0.176576	-0.270969	0.0921795	-0.380379	0.644478	0.806315	0.635769	0.99968	0.553744	0.111068
NZ_CP011454.1	3132951	3133712	+	CDS	GEMMAAP_RS13275	WP_053333771.1	ABC transporter ATP-binding protein	0.395872	-0.641645	-0.564163	-0.176435	0.395853	0.0182004	-0.32188	0.478802	0.717675	0.971554	0.99968	0.983004	0.855781
NZ_CP011454.1	2623423	2624088	-	CDS	GEMMAAP_RS11195	WP_026849704.1	hypothetical protein	4.23871	-0.0108898	0.279489	-0.17577	-0.419969	-0.439609	0.22176	0.983876	0.397606	0.797716	0.99968	0.0382354	0.594511
NZ_CP011454.1	399340	399657	+	CDS	GEMMAAP_RS01785	WP_158514688.1	DUF1330 domain-containing protein	4.76861	-0.0936512	0.123541	-0.17553	-0.0106574	0.334195	-0.0105913	0.757521	0.961776	0.797677	0.99968	0.11471	0.993659
NZ_CP011454.1	2014148	2015971	+	CDS	GEMMAAP_RS08355	WP_026850598.1	DNA mismatch repair endonuclease MutL	7.45361	-0.0833932	0.016572	-0.175304	-0.194865	-0.208826	-0.279707	0.720782	0.96378	0.658189	0.99968	0.186393	0.29065
NZ_CP011454.1	2009046	2010098	+	CDS	GEMMAAP_RS08340	WP_053334429.1	VWA domain-containing protein	6.12846	-0.158018	-0.229208	-0.175104	-0.204046	-0.320871	-0.439103	0.559606	0.468587	0.799034	0.99968	0.131933	0.216891
NZ_CP011454.1	4648577	4649263	+	CDS	GEMMAAP_RS19560	WP_053333826.1	pentapeptide repeat-containing protein	8.11193	2.22057	0.700176	-0.174695	-0.694543	1.28682	-0.122839	0.000873648	0.277042	0.938926	0.99968	0.0125913	0.925428
NZ_CP011454.1	1675459	1678731	-	CDS	GEMMAAP_RS06950	WP_026850384.1	PD40 domain-containing protein	9.40017	-0.288792	-0.037079	-0.174584	-0.103571	-0.361649	-0.131055	0.213611	0.93511	0.755185	0.99968	0.0762639	0.759707
NZ_CP011454.1	490296	491234	+	CDS	GEMMAAP_RS02120	WP_026849233.1	ABC transporter ATP-binding protein	6.78399	-1.02784	-1.08331	-0.174559	-0.41553	-0.0757439	0.154414	0.0232218	0.0473359	0.90884	0.99968	0.867979	0.862229
NZ_CP011454.1	379320	379841	+	CDS	GEMMAAP_RS01670	WP_026849170.1	molybdopterin adenylyltransferase	5.8907	-0.088871	-0.0791414	-0.174271	0.26304	-0.0608532	0.328459	0.729836	0.833686	0.749821	0.99968	0.769855	0.276003
NZ_CP011454.1	2621049	2623070	-	CDS	GEMMAAP_RS11185	WP_026849706.1	acetoacetate--CoA ligase	6.70351	0.266274	0.360722	-0.174239	0.00181976	-0.3059	0.230735	0.0941743	0.0537298	0.620515	0.99968	0.0255168	0.32723
NZ_CP011454.1	601800	602720	+	CDS	GEMMAAP_RS02675	WP_026849322.1	protein-methionine-sulfoxide reductase catalytic subunit MsrP	7.94449	-0.444377	-0.479773	-0.173729	-0.249383	-0.131151	-0.450307	0.114193	0.120164	0.825188	0.99968	0.628076	0.278758
NZ_CP011454.1	2617269	2618465	-	CDS	GEMMAAP_RS11170	WP_053334139.1	aminotransferase class I/II-fold pyridoxal phosphate-dependent enzyme	7.29308	-0.478039	-0.294744	-0.173645	-0.10154	0.256876	-0.0839417	0.0312569	0.24351	0.752154	0.99968	0.19179	0.852669
NZ_CP011454.1	1628377	1629720	+	CDS	GEMMAAP_RS06760	WP_158514761.1	MFS transporter	7.38107	-0.482371	-0.336884	-0.173533	-0.0803444	-0.159309	0.0307562	0.00433388	0.0719012	0.625634	0.99968	0.265512	0.965338
NZ_CP011454.1	4245593	4245985	+	CDS	GEMMAAP_RS17910	WP_026848123.1	nuclear transport factor 2 family protein	2.8429	-0.10277	0.59268	-0.173463	0.395752	-0.119043	-0.0769044	0.843351	0.234837	0.892701	0.99968	0.715286	0.92312
NZ_CP011454.1	1200477	1201232	-	CDS	GEMMAAP_RS04955	WP_026849999.1	ABC transporter ATP-binding protein	4.66998	0.113768	0.406308	-0.173302	-0.38804	0.0577483	0.0876414	0.760586	0.281853	0.848025	0.99968	0.858636	0.900925
NZ_CP011454.1	3038003	3038551	-	CDS	GEMMAAP_RS12860	WP_075071509.1	shikimate kinase	5.77609	-0.184535	0.0977604	-0.173024	-0.128448	-0.0561439	0.143208	0.33043	0.729105	0.690193	0.99968	0.76174	0.659705
NZ_CP011454.1	3643558	3643854	+	CDS	GEMMAAP_RS15390	WP_026848490.1	metal-sulfur cluster assembly factor	6.84613	-0.439543	-0.238679	-0.172806	-0.0910357	-0.0986409	-0.218442	0.0516302	0.37412	0.763353	0.99968	0.653013	0.570203
NZ_CP011454.1	3165015	3165266	+	CDS	GEMMAAP_RS13365	WP_026848791.1	hypothetical protein	6.54587	-0.325581	-0.492124	-0.172599	-0.347369	-0.0128244	0.226386	0.194425	0.0986808	0.809272	0.99968	0.963537	0.585605
NZ_CP011454.1	2268960	2270720	-	CDS	GEMMAAP_RS09590	WP_043581643.1	penicillin-binding protein 2	7.03406	0.0570822	0.241442	-0.172529	-0.0888566	0.317273	0.017013	0.796947	0.224889	0.769281	0.99968	0.0381524	0.97867
NZ_CP011454.1	2910301	2910909	-	CDS	GEMMAAP_RS12335	WP_026849536.1	Maf family protein	4.85145	-0.440221	-0.299018	-0.172376	-0.176824	-0.589727	0.144742	0.142027	0.463899	0.84604	0.99968	0.0174358	0.778766
NZ_CP011454.1	1976148	1977101	-	CDS	GEMMAAP_RS08190	WP_026850573.1	ABC transporter permease	5.2736	0.138371	0.386472	-0.172005	-0.110337	0.622437	0.221985	0.531227	0.112396	0.714366	0.99968	0.000626622	0.479034
NZ_CP011454.1	892869	893309	+	CDS	GEMMAAP_RS03750	WP_158514721.1	hypothetical protein	4.16966	-0.200047	0.0671852	-0.171733	-0.337785	-0.0535036	-0.181966	0.542406	0.919334	0.839468	0.99968	0.85653	0.725056
NZ_CP011454.1	3231384	3233435	+	CDS	GEMMAAP_RS13690	WP_026848741.1	S9 family peptidase	6.27662	0.0120361	0.00892441	-0.171659	0.194181	0.0340053	0.0636797	0.972534	0.984769	0.719077	0.99968	0.863877	0.87108
NZ_CP011454.1	3472939	3474630	+	CDS	GEMMAAP_RS14695	WP_053333698.1	aminotransferase class V-fold PLP-dependent enzyme	3.67337	0.0951323	0.259671	-0.171351	-0.0399803	-0.511445	-0.0389733	0.819065	0.585952	0.861856	0.99968	0.0477173	0.964545
NZ_CP011454.1	1495414	1495899	+	CDS	GEMMAAP_RS06155	WP_026850264.1	GNAT family N-acetyltransferase	5.77328	-0.475507	-0.728351	-0.171233	-0.186589	-0.262884	-0.469571	0.0461923	0.0179156	0.799949	0.99968	0.203239	0.167747
NZ_CP011454.1	2757812	2759200	-	CDS	GEMMAAP_RS11745	WP_026849625.1	DUF1552 domain-containing protein	4.81109	0.295333	0.2421	-0.170817	0.0950672	0.687975	0.0218327	0.267318	0.501001	0.817464	0.99968	0.00275888	0.983264
NZ_CP011454.1	2804514	2806091	+	CDS	GEMMAAP_RS11910	WP_082821269.1	SulP family inorganic anion transporter	5.50687	-0.505657	-0.529561	-0.170633	0.0761563	0.11372	-0.129276	0.0359772	0.0785254	0.812573	0.99968	0.598259	0.759707
NZ_CP011454.1	2603259	2604176	+	CDS	GEMMAAP_RS11075	WP_026849719.1	flap endonuclease	4.44757	-0.283886	-0.314564	-0.170471	-0.259214	-0.214064	0.0144308	0.231705	0.307085	0.789174	0.99968	0.28838	0.98831
NZ_CP011454.1	2755639	2755884	+	CDS	GEMMAAP_RS11735	WP_026849627.1	zinc ribbon domain-containing protein	4.31686	-0.429014	-0.899566	-0.170296	-0.323808	-0.66848	-0.0426847	0.24672	0.065187	0.893614	0.99968	0.0258772	0.966543
NZ_CP011454.1	3047748	3048776	-	CDS	GEMMAAP_RS12900	WP_026849448.1	hypothetical protein	3.11092	-0.394037	-0.412399	-0.170268	-0.0514956	-0.68167	0.158643	0.328255	0.468503	0.90846	0.99968	0.0243676	0.809282
NZ_CP011454.1	1937342	1939999	-	CDS	GEMMAAP_RS08005	WP_026850543.1	ERAP1-like C-terminal domain-containing protein	6.30582	0.0514011	0.031531	-0.17005	-0.123667	-0.409149	0.0239718	0.795684	0.923216	0.61806	0.99968	0.00348774	0.954928
NZ_CP011454.1	34958	36529	-	CDS	GEMMAAP_RS00150	WP_145978916.1	ABC transporter ATP-binding protein	5.79259	0.222136	0.433879	-0.16987	-0.0607254	0.419158	-0.00494121	0.363593	0.120847	0.794568	0.99968	0.046156	0.996981
NZ_CP011454.1	1525749	1527149	+	CDS	GEMMAAP_RS06295	WP_026850287.1	pyruvate kinase	7.17999	0.104228	0.824471	-0.169861	0.0879147	0.17433	-0.0626192	0.800152	0.0312821	0.862007	0.99968	0.562906	0.936554
NZ_CP011454.1	1684446	1684820	+	CDS	GEMMAAP_RS06995	WP_026850392.1	four helix bundle protein	3.78983	0.357019	0.561319	-0.169803	0.183164	-0.198301	0.116622	0.519216	0.416131	0.935682	0.99968	0.632031	0.908156
NZ_CP011454.1	2823923	2825362	+	CDS	GEMMAAP_RS11990	WP_026849585.1	HAMP domain-containing protein	4.99125	0.537301	0.550939	-0.16954	-0.187261	0.259624	0.210615	0.0153075	0.0440228	0.760704	0.99968	0.167666	0.570203
NZ_CP011454.1	4311133	4312626	-	CDS	GEMMAAP_RS18165	WP_145979231.1	carboxypeptidase regulatory-like domain-containing protein	7.04789	0.299345	0.226362	-0.169338	0.135961	-0.167967	0.146785	0.174888	0.389299	0.755185	0.99968	0.400388	0.706524
NZ_CP011454.1	1314882	1316699	-	CDS	GEMMAAP_RS05520	WP_043581044.1	gamma-glutamyltransferase	5.5445	-0.123051	-0.105813	-0.169285	-0.157571	-0.119396	-0.0727887	0.522542	0.919334	0.686058	0.99968	0.446438	0.827153
NZ_CP011454.1	2312031	2313692	+	CDS	GEMMAAP_RS09790	WP_158514801.1	hypothetical protein	6.83901	-0.352005	-0.344301	-0.169094	-0.125029	-0.484691	-0.134258	0.142818	0.214873	0.798569	0.99968	0.0205536	0.759431
NZ_CP011454.1	1921649	1922452	-	CDS	GEMMAAP_RS07935	WP_075071463.1	nucleoside triphosphate pyrophosphohydrolase	5.09158	-0.206346	-0.321104	-0.168695	-0.0406658	-0.398482	0.218989	0.408603	0.297952	0.799034	0.99968	0.0391707	0.550035
NZ_CP011454.1	2966821	2969886	-	CDS	GEMMAAP_RS12590	WP_026849495.1	SusC/RagA family TonB-linked outer membrane protein	7.75459	0.306333	0.57192	-0.168426	0.0329429	-0.582469	0.281941	0.372306	0.12455	0.870696	0.99968	0.0398869	0.611171
NZ_CP011454.1	3356657	3357517	-	CDS	GEMMAAP_RS14245	WP_026848656.1	D-amino acid aminotransferase	6.8743	-0.140842	-0.0214315	-0.168187	-0.12655	-0.261796	0.0953505	0.474262	0.958604	0.698747	0.99968	0.099429	0.773541
NZ_CP011454.1	2123680	2124633	-	CDS	GEMMAAP_RS08885	WP_026850833.1	lysylphosphatidylglycerol synthase domain-containing protein	5.27268	-0.315368	-0.366515	-0.167635	-0.175455	0.0366607	0.0848315	0.100197	0.122207	0.719077	0.99968	0.856193	0.816999
NZ_CP011454.1	3530921	3531226	-	CDS	GEMMAAP_RS14910	WP_158514881.1	hypothetical protein	5.5038	-0.222574	-0.0214689	-0.167503	-0.244274	0.138062	-0.0152321	0.282493	0.962754	0.741162	0.99968	0.46305	0.986657
NZ_CP011454.1	2149558	2150058	-	CDS	GEMMAAP_RS09020	WP_053334535.1	DUF177 domain-containing protein	8.83919	-0.0846408	-0.150916	-0.167465	-0.228272	0.502644	0.111892	0.679812	0.469686	0.665748	0.99968	0.00213604	0.724304
NZ_CP011454.1	4656079	4656264	-	CDS	GEMMAAP_RS19595	WP_026848884.1	hypothetical protein	1.73853	0.866143	0.718719	-0.167422	0.0557698	0.219833	0.0104366	0.04176	0.212886	0.912248	0.99968	0.571017	0.996345
NZ_CP011454.1	823655	825649	+	CDS	GEMMAAP_RS03505	WP_026850222.1	hypothetical protein	8.15859	0.0733956	0.21406	-0.166931	-0.0535791	-0.410238	-0.000442662	0.701692	0.232406	0.631855	0.99968	0.00503215	0.999165
NZ_CP011454.1	4269102	4269713	+	CDS	GEMMAAP_RS17995	WP_026848109.1	hypothetical protein	5.52695	-0.0763652	-0.218203	-0.166684	-0.0319167	-0.233783	0.0209819	0.788402	0.473104	0.785961	0.99968	0.217492	0.97867
NZ_CP011454.1	2724195	2725886	+	CDS	GEMMAAP_RS11605	WP_043580694.1	M28 family metallopeptidase	5.45433	-0.0668611	-0.0608607	-0.166282	0.0240865	-0.0121639	-0.0616147	0.782514	0.868103	0.730171	0.99968	0.954774	0.879021
NZ_CP011454.1	3292908	3294275	+	CDS	GEMMAAP_RS13950	WP_026848698.1	copper oxidase	5.97306	-0.147652	-0.0382029	-0.165446	-0.0703528	-0.0349147	-0.0263975	0.534489	0.93511	0.77117	0.99968	0.876559	0.9687
NZ_CP011454.1	4578938	4580374	-	CDS	GEMMAAP_RS19285	WP_026851029.1	M48 family metalloprotease	5.21974	-0.194026	0.0897834	-0.164868	-0.202467	-0.0389646	-0.191303	0.636041	0.899612	0.882867	0.99968	0.913985	0.756714
NZ_CP011454.1	1105663	1109160	-	CDS	GEMMAAP_RS04600	WP_026850057.1	DNA polymerase III subunit alpha	8.8206	0.0513195	0.0943969	-0.164813	-0.090661	0.0592134	0.223808	0.824286	0.701399	0.686058	0.99968	0.744807	0.419505
NZ_CP011454.1	44786	45349	-	CDS	GEMMAAP_RS00190	WP_145978918.1	hypothetical protein	6.38422	-0.344697	-0.286741	-0.164656	-0.205583	0.00844181	0.237464	0.144227	0.319215	0.797327	0.99968	0.973656	0.526485
NZ_CP011454.1	4437670	4439478	+	CDS	GEMMAAP_RS18695	WP_053334592.1	cytochrome b N-terminal domain-containing protein	6.52992	0.137623	0.0357536	-0.164647	0.105495	0.537532	0.1604	0.41924	0.914665	0.649787	0.99968	0.000423324	0.54221
NZ_CP011454.1	222560	223897	+	CDS	GEMMAAP_RS00980	WP_026849065.1	argininosuccinate synthase	7.31741	-0.102117	-0.172845	-0.164525	-0.173819	-0.433082	-0.0416187	0.559606	0.55409	0.637932	0.99968	0.00285283	0.950658
NZ_CP011454.1	4491645	4493297	-	CDS	GEMMAAP_RS18920	WP_053334605.1	serine/threonine protein kinase	4.24216	-0.46826	-0.272346	-0.164022	-0.222402	-0.653398	-0.0142451	0.142818	0.550154	0.861856	0.99968	0.0135692	0.992772
NZ_CP011454.1	1139464	1140639	-	CDS	GEMMAAP_RS04705	WP_082821068.1	ABC transporter ATP-binding protein	6.0824	0.0442399	-0.101182	-0.163715	-0.0346557	0.0577854	0.00791543	0.807717	0.606383	0.59311	0.99968	0.673586	0.990322
NZ_CP011454.1	3790857	3791558	-	CDS	GEMMAAP_RS16010	WP_026848405.1	DUF969 domain-containing protein	3.06771	-0.24059	-0.136861	-0.163489	-0.436863	-0.508035	0.00272222	0.570958	0.854012	0.890291	0.99968	0.106121	0.998814
NZ_CP011454.1	3997381	3998202	-	CDS	GEMMAAP_RS16880	WP_053333588.1	HTTM domain-containing protein	3.97183	-0.153884	-0.456001	-0.163032	-0.130385	-0.266631	0.0814857	0.648227	0.243995	0.846937	0.99968	0.262186	0.889424
NZ_CP011454.1	2978402	2979565	-	CDS	GEMMAAP_RS12630	WP_026849488.1	VOC family protein	4.73364	-0.308272	-0.81614	-0.163019	-0.290816	-0.670544	-0.223752	0.287608	0.0334519	0.852807	0.99968	0.00634867	0.64621
NZ_CP011454.1	3835394	3835774	-	CDS	GEMMAAP_RS16215	WP_026848370.1	group II truncated hemoglobin	6.3506	-0.596344	-0.624188	-0.16254	0.0078653	-0.524691	0.116129	0.0311863	0.0583158	0.838887	0.99968	0.0278541	0.824139
NZ_CP011454.1	4090525	4091802	-	CDS	GEMMAAP_RS17255	WP_158514913.1	acetamidase/formamidase family protein	4.69266	0.32649	0.406575	-0.162467	-0.00347813	0.441492	0.164897	0.101782	0.0949399	0.735973	0.99968	0.00977553	0.638756
NZ_CP011454.1	1673844	1675349	-	CDS	GEMMAAP_RS06945	WP_026850383.1	SPOR domain-containing protein	8.62145	0.0965943	-0.0899422	-0.162355	0.0444462	0.335266	0.321339	0.7205	0.784512	0.774811	0.99968	0.0885635	0.34434
NZ_CP011454.1	1252759	1253064	+	CDS	GEMMAAP_RS05220	WP_026849958.1	30S ribosomal protein S14	9.16648	-0.278535	0.0747851	-0.16216	-0.0926288	0.868478	-0.0768115	0.261394	0.853183	0.80156	0.99968	0.000365224	0.886355
NZ_CP011454.1	2470964	2472268	-	CDS	GEMMAAP_RS10535	WP_026849797.1	sterol desaturase family protein	5.58716	0.0904517	0.172998	-0.162081	0.00623529	-0.0670587	-0.52345	0.795854	0.671892	0.838433	0.99968	0.812908	0.195649
NZ_CP011454.1	3845157	3845549	-	CDS	GEMMAAP_RS16260	WP_053333620.1	DUF2809 domain-containing protein	4.54621	0.260721	0.208194	-0.16179	-0.000997138	-0.11876	0.278612	0.417896	0.66233	0.861155	0.99968	0.652322	0.537339
NZ_CP011454.1	2549933	2550364	+	CDS	GEMMAAP_RS10840	WP_082821237.1	Rieske (2Fe-2S) protein	6.08923	0.293281	0.101316	-0.161634	0.0478708	-0.267018	0.154843	0.171235	0.763685	0.785961	0.99968	0.150716	0.675863
NZ_CP011454.1	190502	191260	+	CDS	GEMMAAP_RS00840	WP_026849043.1	RES family NAD+ phosphorylase	4.6171	0.00110766	0.0838174	-0.161424	-0.262034	0.100387	0.161425	0.999081	0.846777	0.797677	0.99968	0.632031	0.679037
NZ_CP011454.1	2789210	2791288	+	CDS	GEMMAAP_RS11850	WP_026849606.1	HlyD family efflux transporter periplasmic adaptor subunit	5.16032	0.408478	0.4676	-0.160888	0.246317	0.559849	0.336952	0.0675146	0.0897321	0.789174	0.99968	0.00337605	0.28618
NZ_CP011454.1	140800	141234	+	CDS	GEMMAAP_RS00615	WP_026849015.1	PIN domain-containing protein	4.47356	-0.48515	-0.390709	-0.160183	-0.326355	-0.198341	-0.0164121	0.0284944	0.158869	0.794442	0.99968	0.287485	0.984799
NZ_CP011454.1	1172895	1173719	-	CDS	GEMMAAP_RS04835	WP_026850018.1	hypothetical protein	7.6926	-0.514673	-0.533191	-0.159921	-0.12535	-0.177293	-0.336558	0.119252	0.143447	0.873242	0.99968	0.568658	0.539233
NZ_CP011454.1	3399740	3400783	+	CDS	GEMMAAP_RS14415	WP_075071535.1	CehA/McbA family metallohydrolase	5.61286	-0.235024	-0.108915	-0.159665	0.280236	-0.0111309	-0.265962	0.347698	0.781063	0.814804	0.99968	0.967946	0.516297
NZ_CP011454.1	717247	717732	+	CDS	GEMMAAP_RS03095	WP_043580204.1	MarR family transcriptional regulator	5.34357	0.228894	0.365334	-0.159471	-0.189891	-0.124509	0.145341	0.346104	0.201812	0.872276	0.99968	0.547606	0.718029
NZ_CP011454.1	2528026	2529336	+	CDS	GEMMAAP_RS10770	WP_053334158.1	amidohydrolase family protein	6.47471	0.105787	0.253453	-0.159345	-0.0454878	-0.343906	-0.0149563	0.56743	0.233152	0.686058	0.99968	0.0182998	0.989873
NZ_CP011454.1	3981781	3982134	+	CDS	GEMMAAP_RS16805	WP_043579353.1	alkylphosphonate utilization protein	3.77254	0.31868	0.10732	-0.159336	0.0718418	0.161454	0.252369	0.24672	0.832948	0.843374	0.99968	0.499016	0.570203
NZ_CP011454.1	1793403	1794188	+	CDS	GEMMAAP_RS07450	WP_053334384.1	1-acyl-sn-glycerol-3-phosphate acyltransferase	6.40318	0.233861	0.194106	-0.159009	-0.173691	-0.233454	0.134055	0.334943	0.534833	0.812573	0.99968	0.243447	0.744315
NZ_CP011454.1	1375045	1375359	+	CDS	GEMMAAP_RS05705	WP_026849875.1	transcriptional regulator	4.88657	-0.457519	-0.576083	-0.158755	0.070327	0.158416	0.0761066	0.0481171	0.053735	0.812881	0.99968	0.433936	0.871673
NZ_CP011454.1	3608176	3608760	-	CDS	GEMMAAP_RS15245	WP_026848509.1	sigma-70 family RNA polymerase sigma factor	3.54242	0.0271331	-0.0997399	-0.158648	-0.0330882	0.143614	-0.206572	0.954562	0.990126	0.867524	0.99968	0.590845	0.695185
NZ_CP011454.1	4673690	4674199	-	CDS	GEMMAAP_RS20155	WP_158514941.1	nuclear transport factor 2 family protein	5.32602	-0.188731	-0.114121	-0.158604	0.0742494	-0.235508	0.148455	0.447146	0.771624	0.81357	0.99968	0.209109	0.694084
NZ_CP011454.1	2450889	2451380	-	CDS	GEMMAAP_RS10420	WP_075071485.1	Rrf2 family transcriptional regulator	6.82404	-0.136547	-0.12872	-0.158604	-0.0727525	-0.440564	0.0676496	0.566793	0.670314	0.780174	0.99968	0.0188411	0.88097
NZ_CP011454.1	206979	209990	+	CDS	GEMMAAP_RS00905	WP_158514681.1	serine/threonine-protein kinase	7.16263	0.538789	0.342999	-0.158553	0.0919344	0.275693	0.311719	0.008734	0.12958	0.744438	0.99968	0.112559	0.286709
NZ_CP011454.1	1713562	1715292	+	CDS	GEMMAAP_RS07115	WP_202969204.1	GMC family oxidoreductase	5.40015	0.305167	0.429546	-0.157945	0.0779961	0.531309	0.12712	0.187506	0.118796	0.804856	0.99968	0.00962569	0.772148
NZ_CP011454.1	1548208	1549281	+	CDS	GEMMAAP_RS06425	WP_043581334.1	hypothetical protein	5.63798	0.0193541	-0.0338457	-0.157189	-0.11739	-0.0259849	-0.0346258	0.956953	0.946174	0.799034	0.99968	0.913985	0.954928
NZ_CP011454.1	4096007	4096798	-	CDS	GEMMAAP_RS17275	WP_043579336.1	enoyl-CoA hydratase/isomerase family protein	5.17964	-0.0353944	0.19798	-0.156774	-0.145064	-0.175627	0.0212148	0.942207	0.489846	0.81357	0.99968	0.333613	0.994981
NZ_CP011454.1	4346322	4349105	-	CDS	GEMMAAP_RS18325	WP_026850891.1	phosphoenolpyruvate carboxylase	6.77692	-0.0465352	0.303593	-0.156629	-0.0659554	-0.00117282	0.103716	0.856752	0.158869	0.735865	0.99968	0.995622	0.764395
NZ_CP011454.1	3594739	3595227	+	CDS	GEMMAAP_RS15200	WP_202969146.1	arsenic resistance N-acetyltransferase ArsN2	4.02309	-0.147266	-0.397983	-0.156544	-0.250853	-0.353982	0.150007	0.691642	0.355896	0.873569	0.99968	0.159741	0.774817
NZ_CP011454.1	1193067	1193684	+	CDS	GEMMAAP_RS04925	WP_043581058.1	cytochrome c-type biogenesis protein CcmH	7.50878	-0.0678199	-0.0572751	-0.156509	-0.015574	0.316357	-0.161532	0.800832	0.876481	0.765136	0.99968	0.0886415	0.666269
NZ_CP011454.1	1667058	1667816	-	CDS	GEMMAAP_RS06925	WP_026850379.1	ribonuclease Z	6.48461	-0.281762	0.0256016	-0.156418	-0.115987	0.266335	0.248038	0.135069	0.951335	0.735103	0.99968	0.103823	0.387595
NZ_CP011454.1	3884446	3885762	-	CDS	GEMMAAP_RS16420	WP_026848338.1	Zn-dependent hydrolase	5.91922	-0.0510318	-0.0782934	-0.156168	-0.0955989	0.418138	0.0924078	0.783835	0.730631	0.635769	0.99968	0.00211203	0.730321
NZ_CP011454.1	2678642	2679250	+	CDS	GEMMAAP_RS11420	WP_026849671.1	hypothetical protein	3.91721	-0.520686	-0.369889	-0.156035	-0.0146963	-0.518925	-0.159714	0.0472176	0.281672	0.84074	0.99968	0.0175443	0.724304
NZ_CP011454.1	2015990	2016916	+	CDS	GEMMAAP_RS08360	WP_053334431.1	tRNA (adenosine(37)-N6)-dimethylallyltransferase MiaA	7.28454	-0.113252	-0.0074294	-0.155654	-0.348554	-0.280841	0.0262681	0.632437	0.988811	0.759248	0.99968	0.115692	0.964885
NZ_CP011454.1	4519090	4519671	-	CDS	GEMMAAP_RS19020	WP_158514935.1	hypothetical protein	4.12886	-0.609953	-0.26829	-0.155577	-0.0850849	-0.507964	0.156891	0.0312569	0.492832	0.85423	0.99968	0.0280004	0.743917
NZ_CP011454.1	1705015	1705512	-	CDS	GEMMAAP_RS07080	WP_145979037.1	hypothetical protein	3.93333	-0.00787549	0.222554	-0.155489	-0.116127	0.225518	0.170128	0.992097	0.625325	0.869221	0.99968	0.406432	0.76256
NZ_CP011454.1	475233	476552	-	CDS	GEMMAAP_RS02070	WP_158514692.1	outer membrane protein transport protein	2.86556	0.130748	-0.69275	-0.155335	-0.147756	-0.747964	0.304134	0.76697	0.191137	0.90846	0.99968	0.0072823	0.548449
NZ_CP011454.1	4524925	4525689	-	CDS	GEMMAAP_RS19045	WP_026850993.1	copper resistance protein NlpE N-terminal domain-containing protein	5.33996	-0.383035	-0.335186	-0.155324	-0.0185053	-0.370568	0.232272	0.119252	0.278188	0.829258	0.99968	0.0697195	0.550035
NZ_CP011454.1	67344	68567	+	CDS	GEMMAAP_RS00290	WP_026848973.1	aminotransferase class I/II-fold pyridoxal phosphate-dependent enzyme	6.64248	-0.15061	0.00591688	-0.154659	-0.0310591	-0.45619	0.0165752	0.420404	0.990126	0.719077	0.99968	0.0045093	0.979796
NZ_CP011454.1	551560	553038	-	CDS	GEMMAAP_RS02445	WP_026849283.1	sigma-54 dependent transcriptional regulator	7.50409	-0.0503302	-0.199779	-0.154448	-0.042395	-0.0376867	0.216048	0.800832	0.26112	0.65704	0.99968	0.818754	0.359656
NZ_CP011454.1	91705	92931	-	CDS	GEMMAAP_RS00380	WP_145978923.1	hypothetical protein	3.55288	0.301271	0.301462	-0.154366	-0.129838	-0.072875	-0.0292026	0.316548	0.460621	0.864179	0.99968	0.788437	0.975619
NZ_CP011454.1	477821	478183	+	CDS	GEMMAAP_RS02080	WP_043580152.1	metalloregulator ArsR/SmtB family transcription factor	6.16531	0.449606	0.709998	-0.153955	-0.103935	0.296845	0.41289	0.0210511	0.00712892	0.750612	0.99968	0.0656246	0.103711
NZ_CP011454.1	1109168	1110247	+	CDS	GEMMAAP_RS04605	WP_082821063.1	aminopeptidase	5.36191	-0.279298	-0.168175	-0.153925	-0.0768844	-0.0506896	0.0682986	0.133107	0.505756	0.741162	0.99968	0.785968	0.854294
NZ_CP011454.1	4210116	4211183	+	CDS	GEMMAAP_RS17750	WP_026848149.1	FecR domain-containing protein	4.42764	0.0577048	-0.0540784	-0.15392	0.0112828	0.260227	0.949041	0.952734	0.97176	0.953012	0.99968	0.593025	0.198152
NZ_CP011454.1	2476548	2477012	-	CDS	GEMMAAP_RS10560	WP_026849793.1	biopolymer transporter ExbD	8.86738	0.26482	0.121561	-0.153817	-0.229977	0.180412	-0.422211	0.356634	0.761172	0.839553	0.99968	0.489171	0.315146
NZ_CP011454.1	428225	429199	-	CDS	GEMMAAP_RS01900	WP_026849202.1	SRPBCC domain-containing protein	5.28087	0.957791	0.447046	-0.153803	-0.135424	0.274427	0.198461	0.00126602	0.189999	0.852588	0.99968	0.218803	0.659705
NZ_CP011454.1	3827105	3829336	+	CDS	GEMMAAP_RS16175	WP_145979185.1	response regulator	6.14844	-0.0866955	-0.118022	-0.15353	-0.0510231	0.143863	-0.0339143	0.667267	0.675468	0.711184	0.99968	0.345275	0.935404
NZ_CP011454.1	2469927	2470877	+	CDS	GEMMAAP_RS10530	WP_026849798.1	hypothetical protein	7.66574	-0.39662	-0.308288	-0.153404	-0.0623687	-0.649263	-0.119994	0.0269586	0.120164	0.718813	0.99968	0.000260286	0.70888
NZ_CP011454.1	1019588	1020001	-	CDS	GEMMAAP_RS04240	WP_026850109.1	cytochrome c	5.99206	-0.0213393	0.0386205	-0.153329	-0.124811	-0.12682	-0.086523	0.953109	0.938856	0.808932	0.99968	0.537135	0.84318
NZ_CP011454.1	3296213	3296722	+	CDS	GEMMAAP_RS13970	WP_026848695.1	nuclear transport factor 2 family protein	3.21217	-0.356274	-0.391613	-0.153095	-0.279722	-0.0796542	-0.0572826	0.157611	0.276475	0.846859	0.99968	0.744807	0.954928
NZ_CP011454.1	1321251	1322459	-	CDS	GEMMAAP_RS05545	WP_158514746.1	protein phosphatase 2C domain-containing protein	7.64772	-0.0956173	-0.250424	-0.15307	0.187419	0.0381352	0.229877	0.68879	0.279299	0.763353	0.99968	0.86026	0.479324
NZ_CP011454.1	2619669	2620793	-	CDS	GEMMAAP_RS11180	WP_053334198.1	4-hydroxyphenylpyruvate dioxygenase	6.71599	0.201728	0.260701	-0.152824	0.0339935	0.161153	0.100654	0.142818	0.0986808	0.614628	0.99968	0.176915	0.672255
NZ_CP011454.1	750855	751178	+	CDS	GEMMAAP_RS03245	WP_053334009.1	cytochrome C oxidase subunit IV family protein	8.65143	0.226477	0.251229	-0.152514	0.142896	0.320608	-0.162473	0.328255	0.321255	0.798569	0.99968	0.107069	0.686298
NZ_CP011454.1	2306608	2306826	-	CDS	GEMMAAP_RS09765	WP_158514798.1	hypothetical protein	5.57033	0.261268	0.0648491	-0.152473	0.0509792	-0.193696	0.292192	0.184761	0.86078	0.769281	0.99968	0.249462	0.298412
NZ_CP011454.1	1570581	1571468	+	CDS	GEMMAAP_RS06510	WP_202969199.1	ferredoxin:protochlorophyllide reductase (ATP-dependent) iron-sulfur ATP-binding protein	7.0821	0.231416	0.14672	-0.151933	0.0589433	0.606294	0.161611	0.22167	0.540107	0.740966	0.99968	0.000725144	0.628971
NZ_CP011454.1	3417677	3418135	-	CDS	GEMMAAP_RS14490	WP_026848618.1	hypothetical protein	6.1299	-0.23011	-0.293995	-0.151741	0.340148	-0.152944	-0.0284491	0.618361	0.587865	0.917772	0.99968	0.700313	0.987148
NZ_CP011454.1	1096134	1096868	+	CDS	GEMMAAP_RS04555	WP_145979002.1	nucleotidyltransferase domain-containing protein	6.94278	-0.723165	-0.699814	-0.151374	-0.316878	0.212206	-0.00910169	0.0255271	0.0615036	0.876114	0.99968	0.471863	0.995458
NZ_CP011454.1	1642397	1643023	+	CDS	GEMMAAP_RS06810	WP_026850362.1	hypothetical protein	6.88117	-0.389367	0.0379275	-0.151309	-0.246763	-0.00409335	0.135933	0.253912	0.959241	0.889377	0.99968	0.991432	0.834103
NZ_CP011454.1	1977098	1978717	-	CDS	GEMMAAP_RS08195	WP_158514779.1	peptide ABC transporter substrate-binding protein	5.83702	0.198796	-0.0571383	-0.151212	0.0405181	0.475696	0.194882	0.398794	0.899612	0.808932	0.99968	0.0131349	0.605019
NZ_CP011454.1	4283710	4286619	+	CDS	GEMMAAP_RS18070	WP_082821469.1	CHAT domain-containing protein	4.8725	0.059179	-0.00345809	-0.151198	0.101972	0.0835381	0.0303479	0.887539	0.996353	0.865444	0.99968	0.775165	0.977423
NZ_CP011454.1	4663973	4664872	-	CDS	GEMMAAP_RS19650	WP_082821524.1	prolyl oligopeptidase family serine peptidase	4.76273	0.273516	0.189607	-0.150881	0.0427963	0.0216455	0.319537	0.206477	0.528789	0.803872	0.99968	0.922039	0.28696
NZ_CP011454.1	1684948	1686687	-	CDS	GEMMAAP_RS07000	WP_053334357.1	M28 family peptidase	7.20593	0.207135	0.208955	-0.150386	0.0659953	0.217328	-0.00345201	0.224319	0.28302	0.711184	0.99968	0.144798	0.996981
NZ_CP011454.1	225895	226830	+	CDS	GEMMAAP_RS00995	WP_026849068.1	2-dehydropantoate 2-reductase	6.64845	0.0982428	0.225035	-0.15038	0.136754	-0.0209146	-0.144333	0.743913	0.468503	0.829634	0.99968	0.9389	0.752323
NZ_CP011454.1	2800997	2802631	-	CDS	GEMMAAP_RS11900	WP_053334097.1	D-aminoacylase	6.65395	0.441817	0.689636	-0.150276	0.0652636	0.293688	0.235999	0.0381494	0.0118851	0.794568	0.99968	0.110119	0.49069
NZ_CP011454.1	1796568	1796813	+	CDS	GEMMAAP_RS07475	WP_026850463.1	hypothetical protein	9.24126	-0.469787	-0.346658	-0.150216	0.159005	-0.304139	-0.20642	0.20168	0.415018	0.896968	0.99968	0.364841	0.759707
NZ_CP011454.1	1549924	1550922	-	CDS	GEMMAAP_RS06435	WP_026850307.1	MBL fold metallo-hydrolase	5.48272	0.223685	0.200293	-0.149941	0.0564639	0.935997	0.0130561	0.386942	0.552107	0.828533	0.99968	0.000193098	0.992374
NZ_CP011454.1	4369293	4371518	+	CDS	GEMMAAP_RS18415	WP_202969231.1	cytochrome-c oxidase%2C cbb3-type subunit I	8.44388	-3.82015	-2.63163	-0.149809	-0.541692	-2.68643	-1.26738	0.000796122	0.0199864	0.973029	0.99968	0.00272625	0.347826
NZ_CP011454.1	1209018	1210079	+	CDS	GEMMAAP_RS04995	WP_053334245.1	DUF1611 domain-containing protein	7.59282	-0.371913	-0.290069	-0.149555	0.0400634	0.236073	0.0837276	0.237944	0.444201	0.875159	0.99968	0.410086	0.908156
NZ_CP011454.1	1469553	1470962	+	CDS	GEMMAAP_RS06075	WP_026850251.1	MATE family efflux transporter	6.46706	-0.00685259	0.138704	-0.149404	0.071515	0.387944	0.187417	0.987033	0.5551	0.732433	0.99968	0.0140529	0.528113
NZ_CP011454.1	3514863	3515363	-	CDS	GEMMAAP_RS14835	WP_026848568.1	hypothetical protein	8.14449	-0.852644	-0.180183	-0.149385	-0.290625	-0.53836	-0.776968	0.0440756	0.767724	0.918749	0.99968	0.147655	0.200813
NZ_CP011454.1	297469	298188	+	CDS	GEMMAAP_RS01320	WP_053333916.1	hypothetical protein	4.47188	0.0611174	-0.140653	-0.148934	-0.0974257	-0.80667	0.019274	0.995923	0.733052	0.837745	0.99968	0.000523181	0.98413
NZ_CP011454.1	225182	225883	+	CDS	GEMMAAP_RS00990	WP_026849067.1	hypothetical protein	6.51345	-0.0992982	0.0464994	-0.148875	0.0356659	0.0308802	-0.0549564	0.727218	0.923761	0.825188	0.99968	0.902979	0.922536
NZ_CP011454.1	319413	320114	-	CDS	GEMMAAP_RS01420	WP_053333919.1	HAD-IB family phosphatase	6.04073	-0.0125113	0.149007	-0.148721	-0.0106715	0.0416719	0.0275345	0.976073	0.648714	0.813224	0.99968	0.858274	0.966543
NZ_CP011454.1	4576716	4577183	-	CDS	GEMMAAP_RS19275	WP_026851027.1	hypothetical protein	5.04645	-0.380944	-0.322043	-0.148718	-0.0780767	-0.142677	0.394203	0.17273	0.375332	0.86148	0.99968	0.562906	0.319233
NZ_CP011454.1	3033734	3035092	-	CDS	GEMMAAP_RS12845	WP_043580644.1	methylenetetrahydrofolate--tRNA-(uracil(54)-C(5))-methyltransferase (FADH(2)-oxidizing) TrmFO	7.28666	0.271243	0.279462	-0.148555	-0.0642051	0.499646	0.17266	0.0644815	0.0925297	0.644909	0.99968	0.000452498	0.468869
NZ_CP011454.1	4093649	4094683	-	CDS	GEMMAAP_RS17265	WP_026848219.1	DUF1835 domain-containing protein	7.17223	0.109957	0.0124886	-0.148201	0.126449	-0.597702	0.0547636	0.574768	0.973442	0.726433	0.99968	0.000461529	0.884608
NZ_CP011454.1	4620030	4622375	-	CDS	GEMMAAP_RS19425	WP_158514939.1	TonB-dependent receptor	6.36312	-0.172727	-0.130314	-0.148123	0.0479966	-0.273748	0.223621	0.519216	0.729389	0.837745	0.99968	0.199445	0.586817
NZ_CP011454.1	4155874	4157373	-	CDS	GEMMAAP_RS17500	WP_026848186.1	APC family permease	5.77523	-0.354145	-0.275824	-0.148041	0.0267939	-0.286482	0.11564	0.0874447	0.278188	0.794568	0.99968	0.0964505	0.749682
NZ_CP011454.1	27138	28778	+	CDS	GEMMAAP_RS00115	WP_026848945.1	TldD/PmbA family protein	7.92577	-0.674792	-0.979338	-0.147912	-0.331058	0.0267037	-0.559876	0.0999827	0.0403125	0.918749	0.99968	0.953762	0.366089
NZ_CP011454.1	103917	105593	-	CDS	GEMMAAP_RS00435	WP_053333870.1	hypothetical protein	5.48717	-0.000441201	1.25258e-05	-0.147904	0.0291373	0.0257546	0.00395222	0.999314	0.999962	0.77797	0.99968	0.891709	0.996357
NZ_CP011454.1	132877	133347	+	CDS	GEMMAAP_RS00575	WP_053333872.1	hypothetical protein	3.41468	-0.130643	0.163611	-0.147677	0.084683	-0.0975848	-0.090111	0.658143	0.772317	0.841788	0.99968	0.674758	0.857225
NZ_CP011454.1	1865279	1865986	+	CDS	GEMMAAP_RS07715	WP_053334398.1	YggS family pyridoxal phosphate-dependent enzyme	7.18284	-0.046252	-0.1479	-0.14752	-0.262818	-0.0430279	0.166782	0.906005	0.529194	0.741162	0.99968	0.825559	0.595002
NZ_CP011454.1	392264	392821	+	CDS	GEMMAAP_RS01740	WP_145978946.1	hypothetical protein	6.1264	-0.161235	-0.077934	-0.147427	0.0769761	-0.463947	0.217603	0.527212	0.857833	0.825188	0.99968	0.0151378	0.542237
NZ_CP011454.1	349759	352056	+	CDS	GEMMAAP_RS01545	WP_026849152.1	response regulator	7.42634	-0.0281626	0.0314202	-0.147259	-0.0856686	0.0910928	0.235486	0.99994	0.931385	0.727573	0.99968	0.584335	0.376369
NZ_CP011454.1	2816849	2817685	-	CDS	GEMMAAP_RS11960	WP_026849589.1	purine-nucleoside phosphorylase	5.04586	0.366391	0.136754	-0.147163	-0.153419	0.114156	-0.28113	0.15175	0.735342	0.845692	0.99968	0.669821	0.57552
NZ_CP011454.1	1039448	1041835	-	CDS	GEMMAAP_RS04330	WP_053334269.1	DUF1592 domain-containing protein	6.3942	-0.0359319	-0.0665012	-0.146648	-0.0505194	0.432176	0.0279008	0.883733	0.82501	0.735103	0.99968	0.00412854	0.950658
NZ_CP011454.1	1572677	1573729	+	CDS	GEMMAAP_RS06525	WP_082821546.1	magnesium-protoporphyrin IX monomethyl ester (oxidative) cyclase	7.29649	0.235603	0.0667488	-0.146526	0.163891	0.620032	0.0669737	0.215015	0.825043	0.752154	0.99968	0.000651387	0.865613
NZ_CP011454.1	3612755	3613369	+	CDS	GEMMAAP_RS15265	WP_026848505.1	ATP-binding protein	5.80931	-0.0368156	-0.0390069	-0.146489	-0.409782	-0.529886	0.184608	0.914829	0.939243	0.817464	0.99968	0.00588304	0.614422
NZ_CP011454.1	33885	34961	-	CDS	GEMMAAP_RS00145	WP_053333853.1	ABC transporter permease	5.42409	-0.53319	-0.291016	-0.146208	-0.309441	0.168462	-0.337648	0.0218679	0.311925	0.819105	0.99968	0.425252	0.35205
NZ_CP011454.1	3396253	3397092	-	CDS	GEMMAAP_RS14405	WP_043579453.1	metallophosphoesterase	5.13599	-0.119059	-0.139548	-0.146149	-0.317792	0.150722	0.212998	0.609652	0.639814	0.797677	0.99968	0.411258	0.526485
NZ_CP011454.1	3265593	3267095	+	CDS	GEMMAAP_RS13825	WP_026848718.1	PAS domain-containing protein	6.10364	0.414557	0.384063	-0.146051	0.12823	0.377171	0.0678234	0.0107424	0.0481652	0.701569	0.99968	0.00698606	0.908156
NZ_CP011454.1	3031035	3031580	-	CDS	GEMMAAP_RS12830	WP_043580646.1	ATP-dependent protease subunit HslV	4.80915	-0.270765	-0.367416	-0.145989	-0.280575	-0.173408	0.200181	0.3086	0.377614	0.848591	0.99968	0.429638	0.637095
NZ_CP011454.1	2851293	2852225	+	CDS	GEMMAAP_RS12095	WP_026849571.1	hypothetical protein	4.60538	-0.257172	-0.170338	-0.145944	0.326852	-0.436127	0.0591063	0.567996	0.807979	0.926897	0.99968	0.197343	0.954928
NZ_CP011454.1	357064	357723	+	CDS	GEMMAAP_RS01580	WP_053333926.1	DUF305 domain-containing protein	6.98177	-0.470302	-0.322832	-0.145909	-0.0998699	-0.157949	0.0787565	0.0676645	0.289467	0.84604	0.99968	0.506943	0.884608
NZ_CP011454.1	184245	185591	-	CDS	GEMMAAP_RS00820	WP_075071372.1	hypothetical protein	4.79602	0.10655	0.0130825	-0.145789	0.118582	0.718441	0.0730756	0.726514	0.9838	0.838887	0.99968	0.00151499	0.898785
NZ_CP011454.1	3174259	3174966	+	CDS	GEMMAAP_RS13415	WP_053333765.1	methyltransferase domain-containing protein	6.23445	0.1908	0.471957	-0.145658	0.064094	0.424553	-0.052619	0.38901	0.0583158	0.798569	0.99968	0.0223692	0.916712
NZ_CP011454.1	4135666	4136724	+	CDS	GEMMAAP_RS17430	WP_026848198.1	ligase-associated DNA damage response exonuclease	4.39954	0.289444	0.193817	-0.145432	-0.0360513	0.700403	0.109145	0.269558	0.603794	0.843213	0.99968	0.00279831	0.840318
NZ_CP011454.1	3477414	3479498	-	CDS	GEMMAAP_RS14710	WP_026848587.1	PBP1A family penicillin-binding protein	7.02804	-0.619318	-0.398717	-0.145034	-0.115013	-0.416435	-0.723307	0.0209027	0.18358	0.849946	0.99968	0.0726214	0.0436619
NZ_CP011454.1	4366423	4366920	-	CDS	GEMMAAP_RS18405	WP_053334635.1	DUF411 domain-containing protein	6.75179	-0.307481	-0.197017	-0.145018	-0.164394	-0.0917709	0.177891	0.0823842	0.35547	0.740377	0.99968	0.573854	0.53504
NZ_CP011454.1	117098	117652	-	CDS	GEMMAAP_RS00495	WP_026849001.1	hypothetical protein	4.84508	-0.291435	-0.36397	-0.144935	0.0489113	-0.161186	0.1469	0.446701	0.463899	0.904898	0.99968	0.6134	0.819293
NZ_CP011454.1	600389	601369	-	CDS	GEMMAAP_RS02670	WP_026849321.1	aldo/keto reductase	4.99023	-0.14946	-0.306304	-0.144924	-0.289352	0.404959	-0.163858	0.749229	0.590068	0.919548	0.99968	0.181714	0.809056
NZ_CP011454.1	2856808	2858352	+	CDS	GEMMAAP_RS12115	WP_043580669.1	amidohydrolase family protein	4.07304	0.0375477	0.0939725	-0.144849	0.234419	0.414923	0.199388	0.926539	0.851261	0.849438	0.99968	0.0491948	0.655851
NZ_CP011454.1	3520397	3521740	+	CDS	GEMMAAP_RS14855	WP_053333690.1	Type 1 glutamine amidotransferase-like domain-containing protein	5.41533	-0.189415	-0.278831	-0.144729	-0.0493467	0.169686	-0.0204271	0.361747	0.270886	0.794568	0.99968	0.329707	0.977423
NZ_CP011454.1	4432181	4433785	-	CDS	GEMMAAP_RS18670	WP_082821493.1	PAS domain-containing sensor histidine kinase	7.42004	0.251693	0.263672	-0.144676	0.231717	0.0137881	0.295903	0.174418	0.202913	0.752154	0.99968	0.946709	0.276003
NZ_CP011454.1	328559	329635	-	CDS	GEMMAAP_RS20755	WP_179947318.1	hypothetical protein	8.13555	0.261924	0.293186	-0.144309	0.0373603	0.0226668	0.366484	0.27039	0.262472	0.819105	0.99968	0.931346	0.292025
NZ_CP011454.1	3596271	3597497	-	CDS	GEMMAAP_RS15210	WP_026848514.1	glycosyltransferase	5.11551	0.357007	0.441891	-0.144166	0.0196978	0.358377	0.280138	0.117217	0.10713	0.81864	0.99968	0.0697195	0.445944
NZ_CP011454.1	603423	606287	+	CDS	GEMMAAP_RS02685	WP_082821002.1	EAL domain-containing protein	6.85208	0.269212	0.225185	-0.144009	-0.0295597	0.667039	0.279523	0.0977684	0.227386	0.711184	0.99968	5.7423e-05	0.235239
NZ_CP011454.1	3056466	3057827	+	CDS	GEMMAAP_RS20315	WP_053334044.1	hemolysin family protein	6.6139	-0.285286	-0.326986	-0.143596	-0.162558	-0.133029	0.0756348	0.121812	0.128144	0.757332	0.99968	0.424495	0.829921
NZ_CP011454.1	32957	33877	-	CDS	GEMMAAP_RS00140	WP_026848949.1	ABC transporter permease	5.22725	-0.345919	-0.0570501	-0.143569	-0.076847	0.261676	-0.341398	0.109687	0.891997	0.808932	0.99968	0.17745	0.337894
NZ_CP011454.1	7874	8833	-	CDS	GEMMAAP_RS00045	WP_053333847.1	serine/threonine protein kinase	9.53132	-0.000568788	0.269518	-0.143561	0.114638	0.257586	0.392086	0.999267	0.269205	0.808396	0.99968	0.189633	0.216891
NZ_CP011454.1	1769899	1770663	-	CDS	GEMMAAP_RS07355	WP_053334378.1	phosphoribosylglycinamide formyltransferase	5.85211	0.174944	0.313309	-0.143219	-0.0667243	0.750616	0.0518895	0.513983	0.301154	0.839257	0.99968	0.00115802	0.935404
NZ_CP011454.1	2858410	2862858	-	CDS	GEMMAAP_RS12120	WP_158514844.1	serine hydrolase	5.85322	0.229066	0.156065	-0.143175	0.102644	0.181154	0.125001	0.275573	0.587865	0.799034	0.99968	0.306938	0.726775
NZ_CP011454.1	344636	345259	+	CDS	GEMMAAP_RS01515	WP_026849148.1	hypothetical protein	6.98677	0.0358706	0.192397	-0.143018	0.0375725	-0.221726	0.173997	0.915596	0.513371	0.819105	0.99968	0.259176	0.655851
NZ_CP011454.1	3032781	3033737	-	CDS	GEMMAAP_RS12840	WP_026849457.1	tyrosine recombinase XerC	6.43887	0.259827	0.256082	-0.142448	0.0632438	0.277778	0.0647765	0.106904	0.1703	0.709847	0.99968	0.0441798	0.835671
NZ_CP011454.1	444360	445442	+	CDS	GEMMAAP_RS01960	WP_026849213.1	Gfo/Idh/MocA family oxidoreductase	4.73759	0.0516958	0.194817	-0.142439	-0.0876923	0.57319	0.166409	0.877992	0.5653	0.829258	0.99968	0.00550917	0.694084
NZ_CP011454.1	3154456	3155247	+	CDS	GEMMAAP_RS13340	WP_053333766.1	ABC transporter permease	5.76687	-0.121646	-0.0696873	-0.142333	-0.0681387	0.167457	-0.0697853	0.64982	0.87335	0.8313	0.99968	0.424698	0.891897
NZ_CP011454.1	1527181	1527996	+	CDS	GEMMAAP_RS06300	WP_202969197.1	MBL fold metallo-hydrolase	5.63115	-0.0278362	0.0603849	-0.142293	0.133539	0.401239	0.0683413	0.933976	0.887606	0.817464	0.99968	0.0295278	0.935404
NZ_CP011454.1	2126930	2128426	-	CDS	GEMMAAP_RS08900	WP_043581656.1	RNA polymerase factor sigma-54	7.856	0.0125565	-0.150451	-0.142287	-0.0910487	-0.0361076	-0.167119	0.967598	0.490748	0.741162	0.99968	0.852073	0.585387
NZ_CP011454.1	3068626	3069075	+	CDS	GEMMAAP_RS13000	WP_026849435.1	hypothetical protein	5.32965	0.369956	0.229072	-0.142137	0.0785021	0.174658	0.155518	0.179555	0.538863	0.863312	0.99968	0.47628	0.752323
NZ_CP011454.1	663587	665215	+	CDS	GEMMAAP_RS02880	WP_026849347.1	alpha%2Calpha-trehalase TreF	4.01206	-0.246418	0.0530777	-0.1421	-0.0141318	0.388723	-0.181528	0.417374	0.93511	0.871685	0.99968	0.102748	0.726411
NZ_CP011454.1	2270763	2271272	-	CDS	GEMMAAP_RS09595	WP_026850736.1	rod shape-determining protein MreD	5.61972	0.197851	0.164753	-0.142093	-0.0560492	0.104581	-0.0593057	0.463493	0.663313	0.849438	0.99968	0.662937	0.918337
NZ_CP011454.1	1176374	1178401	-	CDS	GEMMAAP_RS04860	WP_026850014.1	NAD-dependent DNA ligase LigA	5.9549	0.316989	0.224907	-0.141808	-0.070126	0.0489795	0.24176	0.0886734	0.321661	0.763353	0.99968	0.790592	0.375644
NZ_CP011454.1	719646	720707	+	CDS	GEMMAAP_RS03105	WP_026849379.1	phytoene/squalene synthase family protein	6.38706	0.0510804	0.0100338	-0.141489	0.269583	-0.403863	0.157638	0.824286	0.980691	0.763353	0.99968	0.00813547	0.587905
NZ_CP011454.1	4188487	4189686	+	CDS	GEMMAAP_RS17670	WP_043579318.1	ABC transporter permease	5.87536	-0.751455	-0.651216	-0.141337	-0.250942	0.4456	-0.0642102	0.0336171	0.129599	0.911708	0.99968	0.127286	0.940159
NZ_CP011454.1	1663507	1665156	+	CDS	GEMMAAP_RS06910	WP_075071454.1	S41 family peptidase	7.2324	-0.330041	-0.175655	-0.141295	-0.250536	0.357682	-0.199453	0.126242	0.516995	0.812573	0.99968	0.060022	0.595002
NZ_CP011454.1	1665184	1665861	-	CDS	GEMMAAP_RS06915	WP_082821131.1	outer membrane lipoprotein carrier protein LolA	6.02068	-0.410037	-0.412821	-0.141138	-0.171126	-0.394768	-0.663689	0.15946	0.239307	0.875159	0.99968	0.133428	0.126683
NZ_CP011454.1	2783348	2785357	-	CDS	GEMMAAP_RS11830	WP_026849610.1	AAA family ATPase	6.36269	-0.131364	0.0114507	-0.141079	0.0136175	-0.52191	0.123274	0.658061	0.985032	0.849438	0.99968	0.0157349	0.7852
NZ_CP011454.1	1924888	1925301	+	CDS	GEMMAAP_RS07950	WP_202969206.1	cytidine deaminase	6.60886	-0.278755	-0.338477	-0.140935	-0.169289	0.10963	-0.418746	0.227767	0.207573	0.832816	0.99968	0.612326	0.204395
NZ_CP011454.1	3649097	3649360	-	CDS	GEMMAAP_RS15420	WP_026848488.1	ferredoxin family protein	8.11613	-0.233456	0.351549	-0.140908	-0.0237028	-0.24001	-0.0877548	0.505358	0.342488	0.889377	0.99968	0.428846	0.908156
NZ_CP011454.1	4681381	4681791	-	CDS	GEMMAAP_RS19735	WP_053333835.1	TonB family protein	6.07453	-0.320631	-0.0620478	-0.140352	-0.233611	-0.496788	0.0763607	0.0765768	0.850733	0.761985	0.99968	0.00174947	0.816835
NZ_CP011454.1	4401587	4403098	-	CDS	GEMMAAP_RS18560	WP_158514927.1	GMC family oxidoreductase	6.82945	0.0770917	0.304195	-0.140025	0.0979835	-0.034165	0.24678	0.774746	0.227687	0.817464	0.99968	0.877484	0.471608
NZ_CP011454.1	1342154	1344214	-	CDS	GEMMAAP_RS05615	WP_026849890.1	hypothetical protein	5.07134	-0.620914	-0.642747	-0.139918	-0.122253	-0.0959198	0.121423	0.059973	0.127698	0.904898	0.99968	0.749844	0.835671
NZ_CP011454.1	2670975	2671949	+	CDS	GEMMAAP_RS11390	WP_026849677.1	PLP-dependent transferase	6.7584	0.350468	0.130002	-0.139862	-0.0629376	0.149745	0.115227	0.0449421	0.572106	0.752154	0.99968	0.33408	0.712788
NZ_CP011454.1	2629400	2631133	-	CDS	GEMMAAP_RS11215	WP_158514830.1	AMP-dependent synthetase/ligase	3.38892	0.135623	0.0573791	-0.139774	-0.0992917	0.770586	0.057955	0.711375	0.937015	0.888551	0.99968	0.00358913	0.964545
NZ_CP011454.1	1564963	1566705	+	CDS	GEMMAAP_RS06500	WP_026850316.1	ferredoxin:protochlorophyllide reductase (ATP-dependent) subunit B	7.7435	0.694072	0.745553	-0.139764	0.164491	0.794764	0.211209	0.000757853	0.00482446	0.771274	0.99968	4.91438e-05	0.493589
NZ_CP011454.1	1952275	1953249	+	CDS	GEMMAAP_RS08075	WP_026850556.1	HPr(Ser) kinase/phosphatase	8.72837	0.0973521	-0.0345511	-0.139556	-0.133324	-0.183194	-0.0379176	0.720782	0.938856	0.817627	0.99968	0.375998	0.950658
NZ_CP011454.1	4442057	4443484	+	CDS	GEMMAAP_RS18705	WP_082821495.1	sulfatase-like hydrolase/transferase	4.0725	0.277436	0.60302	-0.139483	-0.137178	-0.230533	0.0598696	0.389208	0.115185	0.888551	0.99968	0.368567	0.931714
NZ_CP011454.1	1931789	1932868	+	CDS	GEMMAAP_RS07975	WP_026850538.1	class 1 fructose-bisphosphatase	7.60469	-0.0683383	-0.0760432	-0.139448	0.0583958	-0.761243	-0.318979	0.722019	0.742734	0.713375	0.99968	1.0688e-05	0.164047
NZ_CP011454.1	1529801	1530319	+	CDS	GEMMAAP_RS06315	WP_053334328.1	YtxH domain-containing protein	8.16927	-0.400778	-0.356512	-0.139167	-0.146849	-0.214819	-0.439908	0.0649677	0.133597	0.813224	0.99968	0.270462	0.154865
NZ_CP011454.1	3958684	3961065	-	CDS	GEMMAAP_RS16710	WP_082821424.1	subclass B3 metallo-beta-lactamase	5.93516	0.30094	0.224862	-0.139146	-0.257754	0.262141	-0.0857461	0.091901	0.299818	0.755185	0.99968	0.0856042	0.800871
NZ_CP011454.1	924034	925446	-	CDS	GEMMAAP_RS03860	WP_043581093.1	FAD-binding protein	5.6372	0.0933825	0.215897	-0.13845	-0.0156862	0.0367313	0.210784	0.726524	0.45598	0.829258	0.99968	0.870409	0.56133
NZ_CP011454.1	4475974	4477527	+	CDS	GEMMAAP_RS18850	WP_053334601.1	mercuric reductase	4.88889	0.632394	0.66435	-0.138438	0.0487899	0.374749	0.190006	0.0264018	0.0608665	0.871685	0.99968	0.112452	0.700586
NZ_CP011454.1	4254668	4255144	-	CDS	GEMMAAP_RS17940	WP_145979225.1	hypothetical protein	3.26361	0.250137	0.31817	-0.138316	-0.177504	-0.58714	0.246462	0.492451	0.639814	0.911708	0.99968	0.0263922	0.640121
NZ_CP011454.1	1193684	1194247	+	CDS	GEMMAAP_RS04930	WP_026850003.1	zinc ribbon domain-containing protein	7.1519	0.1391	0.386369	-0.138179	0.0907061	0.39607	-0.216148	0.53288	0.0925297	0.799034	0.99968	0.0273389	0.526485
NZ_CP011454.1	265437	265946	+	CDS	GEMMAAP_RS01155	WP_026849093.1	GAF domain-containing protein	6.07826	-0.415855	-0.567669	-0.138062	-0.0307453	-0.31194	-0.0819525	0.059973	0.0393428	0.82988	0.99968	0.101478	0.852669
NZ_CP011454.1	1211626	1213032	+	CDS	GEMMAAP_RS05010	WP_026849991.1	cysteine--tRNA ligase	7.17642	-0.00739272	0.144253	-0.138035	-0.127822	-0.162343	0.0937874	0.979529	0.669034	0.68993	0.99968	0.217297	0.726158
NZ_CP011454.1	13961	14323	+	CDS	GEMMAAP_RS00065	WP_145978913.1	hypothetical protein	7.64201	0.792296	0.589185	-0.138028	0.0878693	-0.0858268	0.42784	0.00372313	0.0483443	0.855594	0.99968	0.744807	0.270055
NZ_CP011454.1	398669	399169	+	CDS	GEMMAAP_RS01780	WP_026849185.1	DUF5946 family protein	6.04867	0.323785	0.0635846	-0.137935	0.0699663	0.211785	-0.0373643	0.0875084	0.852588	0.788821	0.99968	0.194496	0.935404
NZ_CP011454.1	404653	406374	+	CDS	GEMMAAP_RS01825	WP_043580150.1	amidohydrolase family protein	5.86224	0.0640227	0.209388	-0.137796	0.0436767	0.202247	0.0164159	0.794984	0.380035	0.794442	0.99968	0.220251	0.980922
NZ_CP011454.1	3062741	3064087	+	CDS	GEMMAAP_RS12975	WP_053334042.1	HlyD family efflux transporter periplasmic adaptor subunit	6.22425	-0.030552	0.350653	-0.137614	-0.243049	0.558186	-0.103843	0.924554	0.14873	0.813224	0.99968	0.00419342	0.80936
NZ_CP011454.1	98897	99388	+	CDS	GEMMAAP_RS00410	WP_026848991.1	(2Fe-2S)-binding protein	5.59142	-0.037788	-0.0925206	-0.13755	-0.100923	-0.0683814	0.13048	0.951778	0.767724	0.789174	0.99968	0.694803	0.67476
NZ_CP011454.1	1662763	1663491	+	CDS	GEMMAAP_RS06905	WP_053334354.1	dTMP kinase	7.41698	-0.699011	-0.458129	-0.137337	-0.0845247	0.0387855	-0.383644	0.00314941	0.0723094	0.825188	0.99968	0.870652	0.251744
NZ_CP011454.1	1655981	1657576	+	CDS	GEMMAAP_RS06870	WP_043581351.1	hydantoinase B/oxoprolinase family protein	6.36474	0.146175	0.501614	-0.137293	0.0442175	0.353343	0.0567824	0.447093	0.0236637	0.763353	0.99968	0.0237949	0.883299
NZ_CP011454.1	2914532	2916166	-	CDS	GEMMAAP_RS12355	WP_026849532.1	peptide chain release factor 3	7.09919	0.0339381	0.406553	-0.137138	0.0179932	-0.129378	0.0254196	0.909679	0.0764179	0.80156	0.99968	0.495359	0.966543
NZ_CP011454.1	4587893	4591429	-	CDS	GEMMAAP_RS19315	WP_026851034.1	hypothetical protein	7.07105	-0.0162229	0.132178	-0.13685	-0.022471	0.519341	0.158082	0.959236	0.603794	0.794442	0.99968	0.00320582	0.646035
NZ_CP011454.1	2295288	2295695	-	CDS	GEMMAAP_RS09715	WP_026850718.1	energy transducer TonB	6.19267	0.0605013	-0.337965	-0.136797	-0.142459	-0.43854	-0.211745	0.895353	0.395706	0.898526	0.99968	0.11863	0.715596
NZ_CP011454.1	1502987	1503694	-	CDS	GEMMAAP_RS06185	WP_075071450.1	copper homeostasis protein CutC	4.81842	0.750607	0.50743	-0.136709	0.322969	0.250989	-0.293825	0.0112585	0.153302	0.885508	0.99968	0.319488	0.551163
NZ_CP011454.1	2946940	2947908	-	CDS	GEMMAAP_RS12510	WP_053334067.1	hypothetical protein	7.4631	-0.639021	-0.868718	-0.136611	-0.13074	0.00456727	-0.527229	0.0266057	0.0153355	0.875159	0.99968	0.988541	0.206929
NZ_CP011454.1	4069942	4070436	-	CDS	GEMMAAP_RS17165	WP_202969160.1	tRNA (cytidine(34)-2'-O)-methyltransferase	4.30016	-0.32157	-0.0801724	-0.136576	-0.0878607	-0.555365	0.203633	0.175303	0.858398	0.848025	0.99968	0.00720356	0.60463
NZ_CP011454.1	50138	50449	+	CDS	GEMMAAP_RS00220	WP_053333858.1	DUF1905 domain-containing protein	3.83847	-0.469392	-0.153733	-0.1365	-0.256723	-0.284507	-0.0260759	0.171235	0.796029	0.904898	0.99968	0.287485	0.981546
NZ_CP011454.1	1633459	1635528	+	CDS	GEMMAAP_RS06780	WP_026850357.1	S9 family peptidase	6.50426	-0.111449	-0.230319	-0.136408	-0.0506867	-0.091682	-0.00360309	0.552273	0.170758	0.689011	0.99968	0.482609	0.996345
NZ_CP011454.1	4637427	4637747	-	CDS	GEMMAAP_RS19495	WP_145979254.1	type II toxin-antitoxin system RelE/ParE family toxin	5.94824	-0.00163804	0.280211	-0.136406	-0.163525	-0.366049	0.179723	0.999267	0.659049	0.938926	0.99968	0.311712	0.816999
NZ_CP011454.1	3665583	3666539	+	CDS	GEMMAAP_RS15515	WP_026848475.1	MBL fold metallo-hydrolase	4.27565	0.196979	0.284535	-0.13618	-0.035992	-0.324093	-0.0900192	0.543102	0.480417	0.887417	0.99968	0.195884	0.884608
NZ_CP011454.1	2239138	2239914	+	CDS	GEMMAAP_RS09465	WP_053334512.1	tRNA pseudouridine(38-40) synthase TruA	8.19031	-0.259755	-0.129923	-0.136109	-0.149893	-0.428932	0.103764	0.305426	0.708664	0.848025	0.99968	0.0487224	0.829172
NZ_CP011454.1	397504	397941	+	CDS	GEMMAAP_RS01770	WP_053333933.1	NUDIX domain-containing protein	7.04666	0.169093	0.0376834	-0.136094	-0.0758743	0.293998	0.298354	0.374929	0.919334	0.773667	0.99968	0.0640636	0.268895
NZ_CP011454.1	3770596	3771603	+	CDS	GEMMAAP_RS15940	WP_026848415.1	MoxR family ATPase	5.43913	-0.280087	-0.480407	-0.13594	-0.382649	0.151285	-0.364867	0.395985	0.226252	0.897281	0.99968	0.605064	0.479034
NZ_CP011454.1	3501168	3504104	+	CDS	GEMMAAP_RS14805	WP_053333694.1	prolyl oligopeptidase family serine peptidase	6.56017	0.128	0.331771	-0.135572	-0.11578	0.0857797	0.0404874	0.479721	0.0925297	0.749327	0.99968	0.584335	0.916712
NZ_CP011454.1	266826	267134	+	CDS	GEMMAAP_RS01165	WP_145978935.1	hypothetical protein	3.89567	-0.372053	-0.270345	-0.135547	0.0519988	-0.509538	0.00113887	0.288652	0.587865	0.911091	0.99968	0.129942	0.999165
NZ_CP011454.1	252992	253894	+	CDS	GEMMAAP_RS01085	WP_053333905.1	D-hexose-6-phosphate mutarotase	4.69054	0.0313061	-0.252477	-0.135085	0.168978	0.614089	-0.0206596	0.952174	0.599711	0.903634	0.99968	0.0280004	0.98831
NZ_CP011454.1	1888142	1889101	+	CDS	GEMMAAP_RS07820	WP_026850514.1	hypothetical protein	7.32142	-0.575788	-0.0539072	-0.134759	-0.303515	-0.50664	-0.350393	0.0704433	0.933572	0.896968	0.99968	0.0701859	0.500721
NZ_CP011454.1	3688149	3689630	+	CDS	GEMMAAP_RS15605	WP_043579404.1	NAD(P)/FAD-dependent oxidoreductase	5.61852	0.0416718	-0.202923	-0.134608	0.0230442	-0.107653	0.0241772	0.988672	0.492832	0.838433	0.99968	0.600738	0.974969
NZ_CP011454.1	4662117	4662410	-	CDS	GEMMAAP_RS19635	WP_026848892.1	DUF1330 domain-containing protein	4.22051	0.268516	0.107238	-0.134421	0.223254	0.141382	0.0723808	0.328253	0.824562	0.873569	0.99968	0.566897	0.932643
NZ_CP011454.1	98018	98440	+	CDS	GEMMAAP_RS00400	WP_202969169.1	type II toxin-antitoxin system RelE/ParE family toxin	5.16222	0.0408473	-0.0386766	-0.134381	-0.240712	-0.370075	0.217763	0.920566	0.952005	0.872992	0.99968	0.0951406	0.621521
NZ_CP011454.1	221539	221904	-	CDS	GEMMAAP_RS00970	WP_026849063.1	hypothetical protein	3.58123	0.198889	-0.00464614	-0.13418	-0.0106006	-0.0884968	0.164397	0.592245	0.996159	0.902213	0.99968	0.790683	0.792527
NZ_CP011454.1	394836	395399	+	CDS	GEMMAAP_RS20220	WP_026849182.1	transcriptional regulator	6.23723	-0.0676513	-0.102336	-0.134175	-0.201057	-0.49691	0.227032	0.808629	0.767724	0.829258	0.99968	0.00761184	0.500721
NZ_CP011454.1	916639	918951	-	CDS	GEMMAAP_RS03835	WP_026850171.1	tetratricopeptide repeat protein	5.97463	0.546457	0.501683	-0.133734	0.0495924	0.437772	0.175043	0.00126602	0.0141069	0.725053	0.99968	0.00231833	0.499994
NZ_CP011454.1	4460712	4463405	+	CDS	GEMMAAP_RS18785	WP_053334596.1	serine/threonine-protein kinase	7.0175	-0.117799	0.067336	-0.133541	-0.000344495	-0.203675	0.29419	0.611452	0.846172	0.809272	0.99968	0.251646	0.331349
NZ_CP011454.1	4084973	4086229	+	CDS	GEMMAAP_RS17230	WP_026848222.1	glycosyltransferase family 4 protein	4.8304	0.38471	0.219228	-0.133416	-0.059125	-0.070176	0.088798	0.134503	0.537443	0.866733	0.99968	0.774139	0.856916
NZ_CP011454.1	2070517	2071245	+	CDS	GEMMAAP_RS08640	WP_026850637.1	ribonuclease PH	6.5964	-0.228431	-0.0383957	-0.133282	-0.319321	-0.273	0.125952	0.334921	0.937161	0.839468	0.99968	0.171236	0.759771
NZ_CP011454.1	157415	157651	-	CDS	GEMMAAP_RS00710	WP_043580088.1	type II toxin-antitoxin system Phd/YefM family antitoxin	5.22055	-0.140256	-0.0971309	-0.133245	-0.279845	-0.508918	0.295312	0.693425	0.868103	0.892701	0.99968	0.0474626	0.542237
NZ_CP011454.1	146924	147355	+	CDS	GEMMAAP_RS00645	WP_026849019.1	DUF1801 domain-containing protein	4.89667	-0.361597	-0.357892	-0.133089	0.0347028	-0.379164	0.263443	0.167311	0.2922	0.872788	0.99968	0.0695867	0.497818
NZ_CP011454.1	4262765	4263769	+	CDS	GEMMAAP_RS17970	WP_043579302.1	NAD-dependent epimerase/dehydratase family protein	6.22678	0.277156	0.334065	-0.13291	0.0613139	-0.323924	-0.0723245	0.100448	0.09577	0.755185	0.99968	0.0224819	0.816999
NZ_CP011454.1	294429	296036	-	CDS	GEMMAAP_RS01310	WP_053333915.1	PDZ domain-containing protein	8.80931	-0.648848	-0.455201	-0.132879	-0.252196	-0.299203	-0.624719	0.00976796	0.0931758	0.849438	0.99968	0.174433	0.0610364
NZ_CP011454.1	2652512	2653408	-	CDS	GEMMAAP_RS11320	WP_053334130.1	4-hydroxythreonine-4-phosphate dehydrogenase PdxA	6.88609	-0.576818	-0.514108	-0.132517	-0.451175	0.344925	-0.414474	0.0544924	0.130416	0.890291	0.99968	0.195375	0.374705
NZ_CP011454.1	347631	349070	+	CDS	GEMMAAP_RS01535	WP_145978940.1	glycosyl hydrolase	5.33876	-0.680414	-0.638257	-0.132505	-0.131766	-0.600768	0.18701	0.0182404	0.0785254	0.885988	0.99968	0.0111708	0.690847
NZ_CP011454.1	2844080	2844964	-	CDS	GEMMAAP_RS12060	WP_082821274.1	M55 family metallopeptidase	4.1145	-0.10892	-0.1332	-0.132496	-0.00438758	-0.316569	-0.585078	0.801625	0.832495	0.914757	0.99968	0.308562	0.288668
NZ_CP011454.1	1397592	1400792	-	CDS	GEMMAAP_RS05810	WP_026849857.1	hypothetical protein	6.56577	0.0993816	0.000977983	-0.132171	-0.0125726	0.222863	-0.174295	0.722239	0.998218	0.846937	0.99968	0.275218	0.666939
NZ_CP011454.1	267449	268609	+	CDS	GEMMAAP_RS01175	WP_053333907.1	YncE family protein	2.98406	0.181496	0.165034	-0.131851	0.181307	-0.231732	-0.131728	0.701692	0.824562	0.930528	0.99968	0.518421	0.875894
NZ_CP011454.1	77681	78250	-	CDS	GEMMAAP_RS00330	WP_026848979.1	hypothetical protein	4.30035	-0.368651	-0.248291	-0.131497	-0.153448	-0.53375	-0.276812	0.136002	0.468587	0.862007	0.99968	0.0072823	0.428351
NZ_CP011454.1	3684343	3684894	-	CDS	GEMMAAP_RS15590	WP_026848464.1	methyltransferase domain-containing protein	4.77393	0.326678	0.370703	-0.131398	0.125975	-0.0562918	0.171052	0.274429	0.308812	0.892137	0.99968	0.863641	0.765977
NZ_CP011454.1	357791	359764	+	CDS	GEMMAAP_RS01585	WP_053333927.1	hypothetical protein	8.32061	-0.124093	0.0941195	-0.13128	-0.167585	0.20195	-0.180148	0.720782	0.84221	0.882867	0.99968	0.450443	0.726775
NZ_CP011454.1	4323289	4323750	-	CDS	GEMMAAP_RS18225	WP_043581756.1	hypothetical protein	2.47732	-1.02025	-0.194603	-0.131195	-0.252106	-0.666573	0.737366	0.179165	0.899612	0.973029	0.99968	0.21443	0.410321
NZ_CP011454.1	224235	225008	-	CDS	GEMMAAP_RS00985	WP_026849066.1	VOC family protein	6.57294	-0.822652	-0.880265	-0.13112	-0.491249	-0.599091	-0.832244	0.116317	0.153803	0.953238	0.99968	0.185337	0.27846
NZ_CP011454.1	2993489	2994892	-	CDS	GEMMAAP_RS12690	WP_026849479.1	Gfo/Idh/MocA family oxidoreductase	6.63214	0.383766	0.503663	-0.13104	-0.0812836	0.235941	0.106581	0.0510737	0.0334519	0.808932	0.99968	0.165255	0.76256
NZ_CP011454.1	3567323	3568987	+	CDS	GEMMAAP_RS15100	WP_043579429.1	glycerol-3-phosphate dehydrogenase/oxidase	6.00313	-0.0728487	0.0943587	-0.130771	-0.0920264	-0.484021	0.0614222	0.764659	0.766219	0.81357	0.99968	0.00454469	0.875894
NZ_CP011454.1	3586603	3588090	-	CDS	GEMMAAP_RS15175	WP_082821375.1	DUF1501 domain-containing protein	5.53874	0.465905	0.468474	-0.130534	0.143721	0.686318	0.304563	0.021921	0.0607393	0.817464	0.99968	0.000181522	0.270917
NZ_CP011454.1	982870	985023	+	CDS	GEMMAAP_RS04100	WP_043581085.1	PBP1A family penicillin-binding protein	7.0882	-0.423396	-0.512845	-0.130414	-0.126405	-0.198909	-0.056618	0.0184616	0.0175378	0.785961	0.99968	0.207769	0.882543
NZ_CP011454.1	1817855	1818796	+	CDS	GEMMAAP_RS07555	WP_026850475.1	hypothetical protein	6.97042	0.247348	0.118042	-0.13037	0.00965251	-0.0835454	0.119013	0.289393	0.722624	0.840182	0.99968	0.713069	0.777631
NZ_CP011454.1	4250635	4251189	-	CDS	GEMMAAP_RS17930	WP_026848120.1	hypothetical protein	1.88928	-0.734096	-1.6787	-0.130186	-0.368822	-0.787643	-0.137182	0.134944	0.0389504	0.953238	0.99968	0.112911	0.916712
NZ_CP011454.1	856022	857419	-	CDS	GEMMAAP_RS03620	WP_026850203.1	hypothetical protein	8.14533	0.0850211	0.260072	-0.129922	0.1041	-0.121197	0.114098	0.821914	0.456384	0.886609	0.99968	0.674423	0.845439
NZ_CP011454.1	352648	354399	-	CDS	GEMMAAP_RS01555	WP_026849154.1	response regulator	5.51932	0.322799	0.306887	-0.129805	0.0349773	0.543643	0.388882	0.105487	0.20234	0.81357	0.99968	0.00153265	0.134348
NZ_CP011454.1	742035	742376	-	CDS	GEMMAAP_RS03210	WP_202969214.1	CoA-binding protein	5.26058	-0.409936	-0.16807	-0.129772	0.120945	0.197762	-0.0290322	0.0932088	0.631665	0.863236	0.99968	0.373154	0.972338
NZ_CP011454.1	3689592	3690851	-	CDS	GEMMAAP_RS15610	WP_082821391.1	hypothetical protein	5.27816	0.227793	0.735823	-0.129745	0.145284	-0.195941	0.0595464	0.443004	0.0366638	0.886609	0.99968	0.421953	0.92312
NZ_CP011454.1	4278205	4280853	+	CDS	GEMMAAP_RS18040	WP_026848101.1	PD40 domain-containing protein	6.57903	0.364391	0.327513	-0.12949	0.0317939	-0.155295	0.17056	0.0275908	0.0888605	0.752154	0.99968	0.290935	0.53504
NZ_CP011454.1	3003901	3007206	+	CDS	GEMMAAP_RS12750	WP_158514850.1	AAA family ATPase	5.08001	0.255717	0.130937	-0.129228	0.0667467	0.35788	0.358145	0.357197	0.765105	0.875961	0.99968	0.118641	0.375745
NZ_CP011454.1	3785479	3787017	+	CDS	GEMMAAP_RS15990	WP_043579385.1	alkaline phosphatase D family protein	5.09191	0.0308876	0.0847446	-0.128992	-0.183945	-0.306621	-0.357053	0.903411	0.757239	0.774811	0.99968	0.0392309	0.147943
NZ_CP011454.1	57921	58391	+	CDS	GEMMAAP_RS00260	WP_145978920.1	hypothetical protein	5.61592	0.188044	0.31108	-0.12896	0.0562406	-0.182199	0.0862831	0.305426	0.146384	0.794568	0.99968	0.223342	0.784914
NZ_CP011454.1	3675598	3676035	-	CDS	GEMMAAP_RS15550	WP_026848471.1	putative sulfate/molybdate transporter	4.02013	0.025294	-0.0241681	-0.128791	-0.0592408	-0.681541	0.405445	0.964175	0.976021	0.915825	0.99968	0.00989867	0.352541
NZ_CP011454.1	3875028	3876872	-	CDS	GEMMAAP_RS16400	WP_026848341.1	exodeoxyribonuclease V subunit alpha	5.50902	0.180936	-0.042284	-0.128445	-0.202543	0.224208	0.00725375	0.47105	0.93511	0.850338	0.99968	0.273065	0.994981
NZ_CP011454.1	3052875	3053225	-	CDS	GEMMAAP_RS12930	WP_075071667.1	prepilin-type N-terminal cleavage/methylation domain-containing protein	5.48242	0.250596	0.331471	-0.128036	0.0705868	0.00915076	0.269689	0.497217	0.463899	0.918749	0.99968	0.979134	0.640121
NZ_CP011454.1	2200471	2201064	-	CDS	GEMMAAP_RS09280	WP_026850781.1	Spy/CpxP family protein refolding chaperone	8.18945	-0.499523	-0.165673	-0.127865	-0.0171861	-0.0773511	-0.123642	0.395985	0.861751	0.959624	0.99968	0.897986	0.926804
NZ_CP011454.1	2569983	2571932	-	CDS	GEMMAAP_RS10935	WP_053334148.1	pyrroloquinoline quinone-dependent dehydrogenase	5.48579	0.212914	0.407449	-0.127859	-0.043195	0.467772	-0.000235686	0.231705	0.0575773	0.794169	0.99968	0.00272625	0.999407
NZ_CP011454.1	3311751	3312080	-	CDS	GEMMAAP_RS20075	WP_202969140.1	hypothetical protein	10.6765	-0.0651941	-0.0178531	-0.127562	-0.198814	-0.201297	-0.0972801	0.795854	0.96378	0.809272	0.99968	0.257811	0.796793
NZ_CP011454.1	1730181	1731998	+	CDS	GEMMAAP_RS07185	WP_158514764.1	multicopper oxidase domain-containing protein	4.25392	0.395622	0.49375	-0.127253	-0.0177443	-0.147285	0.116022	0.143176	0.142056	0.875159	0.99968	0.515275	0.804736
NZ_CP011454.1	4530477	4530956	+	CDS	GEMMAAP_RS19065	WP_026850997.1	(2Fe-2S)-binding protein	4.86322	0.361849	0.152239	-0.126963	0.0368358	-0.0311524	0.256708	0.0949106	0.636243	0.838433	0.99968	0.881776	0.407053
NZ_CP011454.1	2039206	2039634	-	CDS	GEMMAAP_RS08470	WP_053334434.1	response regulator	5.2312	0.168885	-0.0325022	-0.126873	0.00194538	-0.545999	0.124374	0.541688	0.956667	0.871685	0.99968	0.0117649	0.781439
NZ_CP011454.1	3175583	3176836	+	CDS	GEMMAAP_RS13425	WP_043579494.1	beta-ketoacyl-ACP synthase II	5.68574	0.394441	0.514974	-0.126742	-0.0217526	0.944026	0.338594	0.103858	0.072974	0.863236	0.99968	0.000168219	0.400275
NZ_CP011454.1	1735258	1736178	-	CDS	GEMMAAP_RS07200	WP_053334369.1	hypothetical protein	4.95945	0.362224	0.300302	-0.126699	-0.0877771	0.131257	0.0534081	0.0622265	0.205516	0.819105	0.99968	0.461376	0.908156
NZ_CP011454.1	3822004	3825009	-	CDS	GEMMAAP_RS16165	WP_043579375.1	exo-alpha-sialidase	6.89074	0.0633545	0.0979828	-0.125615	-0.0489503	0.0918884	0.00465185	0.726514	0.631665	0.730683	0.99968	0.512422	0.994981
NZ_CP011454.1	2731422	2731829	-	CDS	GEMMAAP_RS11640	WP_026849640.1	GxxExxY protein	0.638275	-0.474802	0.361699	-0.125603	-0.226766	-0.778839	-0.356895	0.615412	0.799557	0.973029	0.99968	0.252526	0.816999
NZ_CP011454.1	4457560	4459314	+	CDS	GEMMAAP_RS18770	WP_053334595.1	amidohydrolase	4.50464	0.236117	0.090311	-0.125589	0.0808301	0.565364	0.232981	0.386291	0.854012	0.871685	0.99968	0.0102089	0.595002
NZ_CP011454.1	233303	234346	-	CDS	GEMMAAP_RS01015	WP_026849071.1	hypothetical protein	5.54629	0.0981351	-0.0889361	-0.125295	-0.0945725	0.0568919	0.156541	0.680602	0.876481	0.834897	0.99968	0.774139	0.648177
NZ_CP011454.1	4694188	4694961	-	CDS	GEMMAAP_RS19790	WP_053333839.1	SET domain-containing protein-lysine N-methyltransferase	6.44728	-0.321173	-0.269506	-0.125176	-0.151249	-0.0442083	-0.0353622	0.0945206	0.235091	0.81357	0.99968	0.826412	0.944205
NZ_CP011454.1	3626719	3628989	+	CDS	GEMMAAP_RS15330	WP_202969227.1	molybdopterin-dependent oxidoreductase	8.33124	0.346794	0.211447	-0.124955	0.0591859	0.0886569	-0.14042	0.0534532	0.296502	0.794568	0.99968	0.605064	0.659705
NZ_CP011454.1	10361	13312	+	CDS	GEMMAAP_RS00055	WP_043580060.1	DNA polymerase I	8.188	0.131839	0.284475	-0.124656	-0.0313236	0.165274	-0.00279548	0.443341	0.111609	0.753063	0.99968	0.255292	0.997053
NZ_CP011454.1	3050134	3051333	-	CDS	GEMMAAP_RS12915	WP_026849445.1	HAMP domain-containing sensor histidine kinase	5.80283	0.111241	0.194483	-0.124566	0.0604455	-0.126878	0.288831	0.620668	0.440597	0.825188	0.99968	0.474811	0.315146
NZ_CP011454.1	2283286	2284149	-	CDS	GEMMAAP_RS09650	WP_026850727.1	phosphatidate cytidylyltransferase	6.59778	0.0997197	0.218635	-0.124439	-0.0868908	0.605231	0.052672	0.660544	0.350467	0.817464	0.99968	0.00099192	0.908156
NZ_CP011454.1	215769	216626	-	CDS	GEMMAAP_RS00945	WP_043580358.1	3-mercaptopyruvate sulfurtransferase	5.16628	-0.507565	-0.370777	-0.124425	-0.026261	-0.246827	-0.0864698	0.01531	0.146696	0.839468	0.99968	0.14911	0.817825
NZ_CP011454.1	2266710	2267579	-	CDS	GEMMAAP_RS09580	WP_026850738.1	acetyl-CoA carboxylase%2C carboxyltransferase subunit beta	7.78128	-0.100238	-0.215907	-0.124203	-0.0565134	0.160802	0.0488484	0.636968	0.297952	0.798569	0.99968	0.330858	0.908156
NZ_CP011454.1	2029917	2030468	-	CDS	GEMMAAP_RS08425	WP_026850609.1	hypothetical protein	5.22484	0.033913	0.0623195	-0.123806	0.108921	-0.124278	-0.0388193	0.935056	0.910999	0.888551	0.99968	0.632597	0.959886
NZ_CP011454.1	1608948	1610213	-	CDS	GEMMAAP_RS06685	WP_026850343.1	ABC transporter permease	7.12102	-0.913662	-0.806215	-0.123805	-0.422958	0.452463	-0.562859	0.0880874	0.184291	0.959207	0.99968	0.337158	0.523003
NZ_CP011454.1	1792375	1793370	+	CDS	GEMMAAP_RS07445	WP_053334383.1	thiamine-phosphate kinase	5.14721	-0.000178518	0.303693	-0.123654	0.069131	0.209308	0.159019	0.99994	0.157681	0.808396	0.99968	0.182639	0.611171
NZ_CP011454.1	3029636	3031033	-	CDS	GEMMAAP_RS12825	WP_043580648.1	ATP-dependent protease ATPase subunit HslU	5.87093	0.253586	0.0973658	-0.123538	-0.125494	0.0423358	0.194749	0.117217	0.686385	0.765136	0.99968	0.790683	0.419505
NZ_CP011454.1	4391393	4392370	-	CDS	GEMMAAP_RS18510	WP_145979236.1	hypothetical protein	2.79526	-0.746739	-0.490234	-0.123112	-0.453926	0.156319	-0.186515	0.117403	0.47794	0.953238	0.99968	0.690252	0.817825
NZ_CP011454.1	372304	373902	-	CDS	GEMMAAP_RS01640	WP_075071381.1	serine hydrolase	5.09711	0.411761	0.347282	-0.123043	0.18846	-0.388656	-0.0999095	0.0543674	0.187497	0.846859	0.99968	0.0278541	0.795723
NZ_CP011454.1	1535461	1536051	+	CDS	GEMMAAP_RS06350	WP_026850294.1	recombination mediator RecR	6.09973	-0.130236	-0.155891	-0.122969	-0.104448	0.345765	0.0151453	0.492608	0.521142	0.799322	0.99968	0.0272401	0.983264
NZ_CP011454.1	1760959	1761969	+	CDS	GEMMAAP_RS07320	WP_026850442.1	DUF1611 domain-containing protein	6.36328	-0.0811269	-0.0979246	-0.122919	-0.0193013	-0.229338	0.12547	0.658061	0.668548	0.756936	0.99968	0.0908183	0.646991
NZ_CP011454.1	1691635	1692543	-	CDS	GEMMAAP_RS07020	WP_043581354.1	ABC transporter substrate-binding protein	6.69292	0.103649	0.182391	-0.122858	0.0910489	-0.434672	0.182475	0.649025	0.769618	0.825188	0.99968	0.00992787	0.565893
NZ_CP011454.1	1912775	1914655	+	CDS	GEMMAAP_RS07910	WP_026850527.1	hypothetical protein	7.09646	-0.276638	-0.31053	-0.122638	-0.113356	0.104899	0.0906479	0.107319	0.111609	0.794442	0.99968	0.509975	0.771957
NZ_CP011454.1	1689677	1691638	-	CDS	GEMMAAP_RS07015	WP_026850393.1	HAMP domain-containing protein	6.89766	0.434646	0.546601	-0.122629	0.105861	-0.130381	0.20059	0.00367941	0.00584216	0.722008	0.99968	0.290694	0.339271
NZ_CP011454.1	1207746	1208150	+	CDS	GEMMAAP_RS04985	WP_053334246.1	YbjN domain-containing protein	8.00629	-0.869024	-0.441044	-0.12261	-0.285759	-0.154629	0.234096	0.0384364	0.358869	0.94232	0.99968	0.706635	0.75901
NZ_CP011454.1	4032041	4032967	+	CDS	GEMMAAP_RS20835	WP_202969159.1	SRPBCC domain-containing protein	4.88173	0.236135	0.170693	-0.122568	0.18942	-0.292004	-0.315012	0.287929	0.840004	0.849438	0.99968	0.108495	0.328769
NZ_CP011454.1	4332912	4333838	-	CDS	GEMMAAP_RS18265	WP_026850881.1	branched-chain amino acid transaminase	8.38346	0.0434937	-0.0139357	-0.1218	0.023961	-0.175062	-0.0785425	0.838884	0.967857	0.763353	0.99968	0.226359	0.800273
NZ_CP011454.1	2509255	2511780	-	CDS	GEMMAAP_RS10705	WP_026849774.1	heparinase II/III family protein	5.52016	0.239523	0.260868	-0.121592	-0.146511	0.311417	0.171542	0.34907	0.405696	0.871685	0.99968	0.134215	0.687767
NZ_CP011454.1	2908407	2909222	+	CDS	GEMMAAP_RS12325	WP_026849538.1	hypothetical protein	5.24527	0.4456	0.348813	-0.121577	-0.173982	0.114864	0.0990825	0.0306302	0.162611	0.837745	0.99968	0.527658	0.787607
NZ_CP011454.1	3781546	3783714	-	CDS	GEMMAAP_RS15975	WP_026848411.1	right-handed parallel beta-helix repeat-containing protein	5.16158	0.214676	0.423174	-0.121326	-0.097801	0.109244	0.201491	0.292671	0.0784912	0.833084	0.99968	0.555165	0.550035
NZ_CP011454.1	2743746	2744156	-	CDS	GEMMAAP_RS11685	WP_026849633.1	hypothetical protein	4.50377	-0.0734574	0.0489905	-0.121143	-0.0795265	-0.312612	0.00790088	0.983876	0.923216	0.862985	0.99968	0.092696	0.994981
NZ_CP011454.1	2089245	2091755	+	CDS	GEMMAAP_RS08735	WP_026850856.1	ATP-dependent Clp protease ATP-binding subunit	10.4625	-0.232655	-0.221336	-0.121121	-0.189776	-0.0222394	-0.189025	0.237175	0.308553	0.817464	0.99968	0.917968	0.570659
NZ_CP011454.1	504907	505398	+	CDS	GEMMAAP_RS02195	WP_026849242.1	hypothetical protein	5.98337	-0.393922	-0.017464	-0.121109	-0.0801154	-0.0958053	-0.203788	0.0579328	0.970366	0.839553	0.99968	0.617701	0.549961
NZ_CP011454.1	4173961	4174632	-	CDS	GEMMAAP_RS17595	WP_026848170.1	hypothetical protein	5.19548	-0.0848082	-0.265023	-0.12071	-0.160418	-0.419054	0.159034	0.761945	0.370645	0.863312	0.99968	0.0305013	0.684957
NZ_CP011454.1	1175730	1176281	-	CDS	GEMMAAP_RS04855	WP_158514739.1	hypothetical protein	8.36272	-0.14375	-0.160476	-0.120652	-0.0868554	-0.206419	0.201641	0.535795	0.542365	0.839468	0.99968	0.276536	0.57552
NZ_CP011454.1	4528120	4530399	+	CDS	GEMMAAP_RS19060	WP_026850996.1	molybdopterin-dependent oxidoreductase	6.98514	-0.0963703	0.144079	-0.120635	-0.00363873	-0.286491	0.221964	0.701692	0.608095	0.84074	0.99968	0.11684	0.51792
NZ_CP011454.1	2704248	2705189	+	CDS	GEMMAAP_RS11520	WP_158514832.1	hypothetical protein	6.12456	-0.228644	-0.239761	-0.120585	-0.218835	0.401724	-0.300713	0.233045	0.298725	0.825188	0.99968	0.0168459	0.30283
NZ_CP011454.1	1879654	1880778	+	CDS	GEMMAAP_RS07780	WP_026850508.1	DUF4388 domain-containing protein	6.78309	-0.16418	-0.238326	-0.120409	-0.197918	0.534868	0.254025	0.55324	0.446081	0.873569	0.99968	0.0176112	0.558454
NZ_CP011454.1	4359685	4360698	-	CDS	GEMMAAP_RS18370	WP_075071699.1	NAD-dependent epimerase/dehydratase family protein	6.65409	-0.230121	-0.27852	-0.120284	-0.202345	0.537063	0.0172551	0.363238	0.344791	0.871685	0.99968	0.0132677	0.987258
NZ_CP011454.1	3998199	3998621	-	CDS	GEMMAAP_RS16885	WP_026848269.1	hypothetical protein	3.46243	-0.581442	-0.607156	-0.119778	-0.244896	-0.145809	0.198492	0.0951895	0.189002	0.919249	0.99968	0.624163	0.726158
NZ_CP011454.1	4545284	4546327	-	CDS	GEMMAAP_RS19150	WP_026851007.1	3-deoxy-7-phosphoheptulonate synthase	4.33434	-1.28019	-1.1301	-0.119761	-0.083263	-1.22878	-0.810854	0.0189512	0.106505	0.965288	0.99968	0.00639826	0.270917
NZ_CP011454.1	4320233	4321264	+	CDS	GEMMAAP_RS18205	WP_053334563.1	AraC family transcriptional regulator	5.83979	0.174666	-0.0159151	-0.119669	0.0931766	-0.0769542	0.0955058	0.342337	0.969263	0.812573	0.99968	0.638024	0.759707
NZ_CP011454.1	4049100	4049612	-	CDS	GEMMAAP_RS17070	WP_026848244.1	GNAT family N-acetyltransferase	5.22025	-1.73788	-1.5731	-0.119507	-0.194329	-2.54694	-1.58325	0.000639463	0.0141956	0.953238	0.99968	8.6766e-07	0.00277575
NZ_CP011454.1	4464426	4464869	-	CDS	GEMMAAP_RS18795	WP_026850958.1	DM13 domain-containing protein	5.09189	0.0183689	0.0571283	-0.119477	-0.0569963	0.00125453	0.110663	0.953766	0.881534	0.837745	0.99968	0.995622	0.753609
NZ_CP011454.1	2254734	2255795	-	CDS	GEMMAAP_RS09530	WP_075071474.1	tRNA dihydrouridine synthase DusB	7.00219	-0.0977066	0.0640491	-0.119259	-0.141066	0.0783893	0.0312732	0.579737	0.791908	0.765136	0.99968	0.598263	0.935404
NZ_CP011454.1	2634260	2635246	-	CDS	GEMMAAP_RS11235	WP_026849697.1	deoxyhypusine synthase family protein	7.18094	-0.0963418	0.014749	-0.119183	-0.105212	0.132963	-0.0645297	0.52313	0.961265	0.718813	0.99968	0.28176	0.809282
NZ_CP011454.1	1964033	1966102	+	CDS	GEMMAAP_RS08140	WP_026850567.1	TonB-dependent receptor plug domain-containing protein	5.20198	-0.0765423	0.218923	-0.119147	-0.0854249	0.468735	0.150964	0.812062	0.516995	0.881985	0.99968	0.0286108	0.74059
NZ_CP011454.1	4647828	4648484	+	CDS	GEMMAAP_RS19555	WP_026848877.1	hypothetical protein	8.28806	2.13062	0.762592	-0.119009	-0.666574	0.871279	-0.228764	0.000800818	0.208685	0.963847	0.99968	0.0669117	0.823384
NZ_CP011454.1	1179665	1180999	+	CDS	GEMMAAP_RS04875	WP_026850012.1	thymidine phosphorylase	6.25681	-0.155998	-0.033579	-0.118905	-0.0712762	-0.0427037	0.192719	0.431562	0.970081	0.825188	0.99968	0.827369	0.526485
NZ_CP011454.1	2590785	2592356	+	CDS	GEMMAAP_RS11010	WP_158514823.1	DUF4403 family protein	5.86713	-0.588803	0.0343976	-0.118886	-0.174108	-0.149462	-0.409534	0.183257	0.971947	0.95152	0.99968	0.724562	0.578654
NZ_CP011454.1	1610219	1611466	-	CDS	GEMMAAP_RS06690	WP_026850344.1	ABC transporter permease	7.86248	-1.08985	-1.00123	-0.118838	-0.292455	0.371377	-0.473403	0.0681456	0.128539	0.967869	0.99968	0.499596	0.647911
NZ_CP011454.1	3753201	3753854	-	CDS	GEMMAAP_RS15875	WP_026848425.1	VTT domain-containing protein	6.23981	-0.222255	-0.305049	-0.118546	-0.0586641	0.10097	-0.00579807	0.388762	0.307883	0.877261	0.99968	0.669743	0.996345
NZ_CP011454.1	3451717	3452904	-	CDS	GEMMAAP_RS20355	WP_145979162.1	hypothetical protein	6.96049	0.396077	0.172141	-0.118235	0.249026	-0.210602	0.214732	0.0536897	0.511785	0.838887	0.99968	0.241394	0.519309
NZ_CP011454.1	2899703	2900965	+	CDS	GEMMAAP_RS12290	WP_026849542.1	ATP-dependent Clp protease ATP-binding subunit ClpX	8.95948	-0.317417	-0.429755	-0.118172	-0.0823649	-0.06778	-0.134453	0.0462737	0.018865	0.763353	0.99968	0.665522	0.634728
NZ_CP011454.1	2006026	2007000	+	CDS	GEMMAAP_RS08325	WP_026850593.1	AAA family ATPase	7.14137	-0.591369	-0.496829	-0.118171	-0.130929	-0.599485	-0.380031	0.0209427	0.0886298	0.883864	0.99968	0.0082397	0.321399
NZ_CP011454.1	515009	515773	-	CDS	GEMMAAP_RS02240	WP_026849249.1	ABC transporter ATP-binding protein	6.68381	-0.37098	-0.18716	-0.117757	-0.207444	-0.237092	-0.371695	0.0737447	0.475392	0.843329	0.99968	0.194496	0.216891
NZ_CP011454.1	150156	150530	+	CDS	GEMMAAP_RS00665	WP_053333877.1	hypothetical protein	6.41893	-0.987426	-0.966998	-0.117688	-0.396567	0.0772587	0.0493439	0.00757453	0.0315817	0.930479	0.99968	0.830598	0.959332
NZ_CP011454.1	1392963	1393289	+	CDS	GEMMAAP_RS05785	WP_026849861.1	hypothetical protein	4.64326	0.146741	0.0306825	-0.1176	-0.00516351	0.102822	-0.201265	0.667267	0.96378	0.905341	0.99968	0.702686	0.687168
NZ_CP011454.1	3263284	3265566	+	CDS	GEMMAAP_RS13820	WP_202969139.1	S9 family peptidase	6.61418	-0.182118	-0.252374	-0.117343	-0.0809542	-0.0935217	-0.212736	0.305426	0.214942	0.811858	0.99968	0.559719	0.424308
NZ_CP011454.1	4591441	4592154	-	CDS	GEMMAAP_RS19320	WP_053334629.1	DotU family type IV/VI secretion system protein	4.80586	0.0776999	-0.0827434	-0.117295	0.0569355	0.109561	-0.205162	0.726514	0.910232	0.825188	0.99968	0.497667	0.473082
NZ_CP011454.1	4402986	4403660	-	CDS	GEMMAAP_RS20690	WP_075071571.1	hypothetical protein	6.53358	-0.350313	-0.123915	-0.117139	-0.0807133	-0.326915	0.0356876	0.27898	0.819668	0.921162	0.99968	0.215267	0.969588
NZ_CP011454.1	3764203	3766506	+	CDS	GEMMAAP_RS15920	WP_026848419.1	glutamine amidotransferase	6.50367	-0.391716	-0.482377	-0.117036	-0.134562	0.136194	0.125573	0.101085	0.0889274	0.873242	0.99968	0.534986	0.771957
NZ_CP011454.1	1401986	1404241	-	CDS	GEMMAAP_RS05820	WP_053334208.1	carbohydrate binding family 9 domain-containing protein	6.15372	-0.292214	-0.144257	-0.11683	-0.0510918	0.257702	-0.146025	0.202036	0.655102	0.870772	0.99968	0.194496	0.724273
NZ_CP011454.1	2298612	2300606	-	CDS	GEMMAAP_RS09730	WP_043581640.1	3-phosphoshikimate 1-carboxyvinyltransferase	7.95429	0.0504594	0.355906	-0.116808	-0.0949298	0.399042	0.109494	0.842407	0.0953113	0.825188	0.99968	0.0199602	0.759707
NZ_CP011454.1	1096950	1097546	+	CDS	GEMMAAP_RS04560	WP_202969188.1	LemA family protein	7.54015	-0.582446	-0.384873	-0.116787	-0.269239	0.135677	-0.319424	0.100703	0.349015	0.928466	0.99968	0.695484	0.595002
NZ_CP011454.1	1150636	1153653	+	CDS	GEMMAAP_RS04750	WP_158514735.1	PAS domain S-box protein	7.92842	0.149198	0.268761	-0.116771	-0.12595	0.0197452	0.10619	0.377566	0.132121	0.785961	0.99968	0.912179	0.718796
NZ_CP011454.1	424162	426855	+	CDS	GEMMAAP_RS01890	WP_026849201.1	carbohydrate binding family 9 domain-containing protein	5.7844	0.12593	0.174833	-0.116719	-0.0723068	-0.242674	0.238409	0.782743	0.769618	0.936875	0.99968	0.426204	0.684957
NZ_CP011454.1	1840035	1840979	+	CDS	GEMMAAP_RS07630	WP_082821154.1	M28 family peptidase	5.39062	-0.339053	-0.0976856	-0.116444	-0.15096	0.295635	-0.0854654	0.181546	0.822585	0.885988	0.99968	0.172187	0.871963
NZ_CP011454.1	1047341	1047835	-	CDS	GEMMAAP_RS04360	WP_026850091.1	LuxR C-terminal-related transcriptional regulator	5.83051	-0.375502	-0.158508	-0.115833	-0.361679	-0.46196	0.186187	0.185537	0.722624	0.907495	0.99968	0.0488056	0.695185
NZ_CP011454.1	446300	448108	-	CDS	GEMMAAP_RS01970	WP_026849215.1	PTS glucose transporter subunit IIBC	5.92167	0.150671	0.3074	-0.115785	0.156308	0.541843	0.0858843	0.407725	0.133597	0.812573	0.99968	0.000626622	0.78207
NZ_CP011454.1	4042703	4044004	-	CDS	GEMMAAP_RS17050	WP_026848246.1	NCS2 family permease	5.0425	-0.241522	-0.0508075	-0.115733	-0.0827399	-0.156148	-0.418441	0.426403	0.938856	0.907495	0.99968	0.529647	0.299112
NZ_CP011454.1	2122740	2123492	-	CDS	GEMMAAP_RS08880	WP_053334542.1	polyprenol monophosphomannose synthase	6.61265	-0.253873	-0.123801	-0.115551	-0.118546	-0.465913	-0.0894862	0.117403	0.561088	0.794568	0.99968	0.00168111	0.759707
NZ_CP011454.1	2212294	2212437	-	CDS	GEMMAAP_RS20535	WP_158514796.1	hypothetical protein	5.3024	0.262758	-0.0103834	-0.11553	0.0367134	0.251825	-0.0123962	0.346104	0.989301	0.895869	0.99968	0.282528	0.993222
NZ_CP011454.1	4662630	4662959	-	CDS	GEMMAAP_RS19640	WP_075071583.1	BrnA antitoxin family protein	5.01165	0.450922	0.281391	-0.115232	0.12642	0.0530666	0.0802791	0.0316456	0.288497	0.849438	0.99968	0.794215	0.978354
NZ_CP011454.1	3087376	3089166	-	CDS	GEMMAAP_RS13095	WP_026848833.1	acyl-CoA dehydrogenase C-terminal domain-containing protein	6.38274	-0.558762	-0.219283	-0.1152	-0.132906	0.222202	0.0870939	0.136056	0.676475	0.942304	0.99968	0.513393	0.916922
NZ_CP011454.1	3905903	3907063	-	CDS	GEMMAAP_RS16505	WP_026848324.1	glycosyltransferase family 9 protein	6.98864	-0.352373	-0.604091	-0.1151	-0.143064	-0.534088	-0.39451	0.560208	0.350467	0.967604	0.99968	0.272622	0.680535
NZ_CP011454.1	4469440	4470834	-	CDS	GEMMAAP_RS18820	WP_075071573.1	hypothetical protein	4.05492	0.00491577	-0.454285	-0.114914	0.108209	-0.0888924	0.050489	0.996133	0.323707	0.928466	0.99968	0.773961	0.952143
NZ_CP011454.1	1134557	1135123	+	CDS	GEMMAAP_RS04685	WP_026850043.1	hypothetical protein	6.54371	-0.224441	-0.0585977	-0.114637	-0.281349	0.201342	0.250738	0.355218	0.898952	0.872276	0.99968	0.3178	0.493589
NZ_CP011454.1	1501327	1502967	-	CDS	GEMMAAP_RS06180	WP_043581327.1	beta-N-acetylhexosaminidase	5.56611	0.460124	0.420638	-0.114587	0.215712	0.711001	0.120051	0.0681456	0.158869	0.888551	0.99968	0.0026765	0.816999
NZ_CP011454.1	2598213	2599394	-	CDS	GEMMAAP_RS11050	WP_082821247.1	metallophosphoesterase	5.55603	-0.0602361	-0.132444	-0.114339	-0.0734386	0.0445229	0.169962	0.818478	0.666042	0.848025	0.99968	0.937918	0.614759
NZ_CP011454.1	966127	966882	+	CDS	GEMMAAP_RS04025	WP_053334283.1	ABC transporter ATP-binding protein	6.25657	-0.233473	-0.537539	-0.114298	-0.0741134	-0.0738859	-0.244078	0.171235	0.0156604	0.813224	0.99968	0.647378	0.339271
NZ_CP011454.1	1561995	1562870	-	CDS	GEMMAAP_RS06485	WP_053334337.1	cobalamin-dependent protein	7.50525	-0.112999	-0.054634	-0.114251	0.0302449	-0.152102	-0.115635	0.560208	0.855189	0.813224	0.99968	0.337476	0.718557
NZ_CP011454.1	2713848	2715020	-	CDS	GEMMAAP_RS11560	WP_026849650.1	P1 family peptidase	6.69697	-0.1163	-0.024618	-0.114152	-0.0110704	-0.260554	0.198668	0.571434	0.953916	0.829258	0.99968	0.100859	0.500721
NZ_CP011454.1	60741	62099	+	CDS	GEMMAAP_RS00270	WP_082820936.1	1-acyl-sn-glycerol-3-phosphate acyltransferase	5.33304	-0.00272139	0.17622	-0.113835	-0.0341674	0.0616771	0.30102	0.996133	0.455463	0.825188	0.99968	0.730935	0.257985
NZ_CP011454.1	345272	346255	+	CDS	GEMMAAP_RS01520	WP_082820970.1	MBL fold metallo-hydrolase	6.76132	-0.100701	0.11905	-0.113825	0.112995	-0.292964	0.154089	0.650643	0.654078	0.832816	0.99968	0.0760332	0.644131
NZ_CP011454.1	4363325	4364089	-	CDS	GEMMAAP_RS18385	WP_053334573.1	hypothetical protein	5.93784	0.252751	0.213279	-0.113788	0.218746	-0.117441	0.0751229	0.18965	0.382366	0.837897	0.99968	0.493216	0.835671
NZ_CP011454.1	2082022	2082825	+	CDS	GEMMAAP_RS08700	WP_026850863.1	zinc-ribbon domain-containing protein	6.99845	0.14476	0.297202	-0.113786	-0.19977	0.0932626	-0.0479777	0.417599	0.120164	0.808396	0.99968	0.559868	0.900925
NZ_CP011454.1	1090562	1092064	+	CDS	GEMMAAP_RS04530	WP_145979001.1	RagB/SusD family nutrient uptake outer membrane protein	8.87358	0.367278	0.13792	-0.113327	0.140414	-0.00543987	-0.00957456	0.177079	0.71611	0.894848	0.99968	0.985478	0.994981
NZ_CP011454.1	3845688	3847016	+	CDS	GEMMAAP_RS16265	WP_053333619.1	pilus assembly protein TadG-related protein	6.93657	0.0687518	-0.0256747	-0.113191	0.0395373	-0.335741	-0.13147	0.788402	0.953916	0.849438	0.99968	0.0601247	0.722829
NZ_CP011454.1	2305534	2306526	-	CDS	GEMMAAP_RS09760	WP_026850711.1	M20/M25/M40 family metallo-hydrolase	7.81991	-0.0925075	-0.0642275	-0.113152	-0.0567751	-0.582041	0.16864	0.624104	0.795271	0.797677	0.99968	0.000302472	0.531187
NZ_CP011454.1	2300603	2301454	-	CDS	GEMMAAP_RS09735	WP_026850715.1	2%2C3%2C4%2C5-tetrahydropyridine-2%2C6-dicarboxylate N-succinyltransferase	7.10729	0.0295729	0.108882	-0.112608	-0.0765431	0.400242	0.170187	0.901775	0.609265	0.797327	0.99968	0.00625006	0.526485
NZ_CP011454.1	1339194	1339994	+	CDS	GEMMAAP_RS05605	WP_026849891.1	carbon-nitrogen hydrolase family protein	6.83881	-0.36709	0.00478772	-0.112558	-0.104111	0.0893863	0.147333	0.115324	0.993349	0.873569	0.99968	0.687373	0.718796
NZ_CP011454.1	2463123	2464472	-	CDS	GEMMAAP_RS10505	WP_158514811.1	DUF1343 domain-containing protein	7.22425	-0.281191	-0.0711107	-0.112172	-0.212923	0.0250375	-0.0478805	0.110694	0.792302	0.817464	0.99968	0.892555	0.906279
NZ_CP011454.1	4523618	4523833	+	CDS	GEMMAAP_RS19030	WP_026850990.1	(4Fe-4S)-binding protein	5.59722	-0.524306	-0.530184	-0.112137	0.0911115	-0.585562	-0.0763426	0.105524	0.188135	0.935682	0.99968	0.026219	0.911264
NZ_CP011454.1	2929076	2929684	-	CDS	GEMMAAP_RS12415	WP_026849524.1	UbiX family flavin prenyltransferase	6.06646	0.087972	0.172032	-0.111901	-0.176133	0.660814	0.256237	0.699996	0.492416	0.838433	0.99968	0.000395735	0.392315
NZ_CP011454.1	110683	111900	+	CDS	GEMMAAP_RS00465	WP_082820939.1	DUF4249 family protein	4.55238	0.0222956	0.187658	-0.111747	0.0964729	0.224829	0.363457	0.956769	0.721435	0.891928	0.99968	0.288848	0.319958
NZ_CP011454.1	853817	854677	+	CDS	GEMMAAP_RS03610	WP_043581105.1	hypothetical protein	6.65489	0.15943	0.166838	-0.111668	-0.0443865	0.169519	0.241731	0.364457	0.425628	0.813224	0.99968	0.260725	0.346165
NZ_CP011454.1	203973	206519	-	CDS	GEMMAAP_RS00900	WP_158514680.1	TonB-dependent receptor	6.06189	-0.181513	-0.0449979	-0.1115	0.0933088	-0.539566	0.0294651	0.481351	0.932757	0.887417	0.99968	0.0087896	0.965338
NZ_CP011454.1	511423	512148	+	CDS	GEMMAAP_RS02225	WP_043580158.1	hypothetical protein	4.3565	-0.348304	-0.298977	-0.111454	-0.150335	0.237443	-0.635368	0.267926	0.489996	0.920061	0.99968	0.425252	0.228113
NZ_CP011454.1	1923680	1924891	+	CDS	GEMMAAP_RS07945	WP_053334415.1	phosphopentomutase	8.26427	-0.442201	-0.478164	-0.11128	-0.241381	0.0878735	-0.373173	0.174418	0.181012	0.923873	0.99968	0.794215	0.477367
NZ_CP011454.1	4264616	4266010	-	CDS	GEMMAAP_RS17980	WP_026848111.1	cytochrome c	4.57332	0.196107	0.352532	-0.111234	0.107094	0.120099	-0.219294	0.422211	0.228531	0.898203	0.99968	0.530505	0.526485
NZ_CP011454.1	4309564	4309923	-	CDS	GEMMAAP_RS18155	WP_158514922.1	hypothetical protein	3.23748	-0.420191	-0.398892	-0.111189	0.397744	-0.248549	0.0694959	0.250072	0.439837	0.95065	0.99968	0.387486	0.954928
NZ_CP011454.1	4603187	4605031	+	CDS	GEMMAAP_RS19370	WP_026848848.1	type VI secretion system baseplate subunit TssF	6.38942	0.313005	0.154996	-0.110461	0.178461	0.646314	0.172468	0.156043	0.603928	0.871685	0.99968	0.00150052	0.659705
NZ_CP011454.1	4452187	4453392	+	CDS	GEMMAAP_RS18750	WP_145979243.1	hypothetical protein	5.16565	-0.0699802	0.238547	-0.110415	-0.136556	-0.327903	0.167911	0.783835	0.431694	0.853372	0.99968	0.0488019	0.610058
NZ_CP011454.1	3175038	3175586	+	CDS	GEMMAAP_RS13420	WP_043579496.1	SRPBCC family protein	4.81022	0.363254	0.427714	-0.110267	0.147726	0.692282	0.234413	0.116479	0.123791	0.877895	0.99968	0.00126271	0.563145
NZ_CP011454.1	1662399	1662749	+	CDS	GEMMAAP_RS06900	WP_026850376.1	YlbF family regulator	6.06106	-0.440644	-0.696578	-0.110032	-0.124037	0.124178	-0.195962	0.0599809	0.0194805	0.883864	0.99968	0.569248	0.638756
NZ_CP011454.1	610287	612413	+	CDS	GEMMAAP_RS02720	WP_043580180.1	TonB-dependent receptor	5.36565	-0.517468	-0.538993	-0.109993	-0.142044	-0.795831	0.188316	0.0929331	0.14723	0.919249	0.99968	0.00354446	0.724273
NZ_CP011454.1	4388724	4389185	+	CDS	GEMMAAP_RS18495	WP_053334581.1	Rieske (2Fe-2S) protein	4.34335	-0.453647	-0.647386	-0.109984	0.0546337	-0.3446	-0.122565	0.187	0.147065	0.938926	0.99968	0.211885	0.845439
NZ_CP011454.1	238764	240086	-	CDS	GEMMAAP_RS01035	WP_145978934.1	hypothetical protein	7.92113	-0.45571	-0.675471	-0.109938	-0.479756	0.0185627	-0.871819	0.361704	0.214397	0.960156	0.99968	0.973417	0.220405
NZ_CP011454.1	458445	460349	+	CDS	GEMMAAP_RS02020	WP_145978956.1	multicopper oxidase domain-containing protein	5.15427	0.106711	-0.01844	-0.109781	0.0237664	0.442348	0.232137	0.706156	0.984929	0.881985	0.99968	0.0248526	0.54221
NZ_CP011454.1	2186723	2187388	-	CDS	GEMMAAP_RS19985	WP_158514794.1	ComF family protein	6.78475	-0.434393	-0.468732	-0.109739	-0.150565	-0.394724	0.0753277	0.0197364	0.0364484	0.837897	0.99968	0.0140529	0.83034
NZ_CP011454.1	2462368	2463009	-	CDS	GEMMAAP_RS10500	WP_053334178.1	CDP-alcohol phosphatidyltransferase family protein	7.15123	-0.0562702	-0.234767	-0.109722	-0.00430986	-0.155547	-0.00782889	0.891305	0.233776	0.817464	0.99968	0.302185	0.996981
NZ_CP011454.1	2845001	2846626	-	CDS	GEMMAAP_RS20585	WP_158514843.1	hypothetical protein	4.58376	-0.266023	-0.0953872	-0.109688	0.18897	-0.270552	-0.238763	0.24851	0.807614	0.880724	0.99968	0.1839	0.550035
NZ_CP011454.1	3859505	3860047	+	CDS	GEMMAAP_RS16335	WP_053333617.1	hypothetical protein	3.20575	-1.30718	-0.433184	-0.109477	-0.0650221	-1.70324	-1.14896	0.0250838	0.610203	0.973029	0.99968	0.000887551	0.126349
NZ_CP011454.1	3975230	3977548	-	CDS	GEMMAAP_RS16780	WP_053333590.1	carbohydrate binding family 9 domain-containing protein	5.67495	-0.0919525	0.000246421	-0.109326	-0.0400357	-0.075015	0.191018	0.784274	0.999304	0.906061	0.99968	0.763403	0.659705
NZ_CP011454.1	1899216	1900649	+	CDS	GEMMAAP_RS07865	WP_026850520.1	UDP-N-acetylmuramoyl-L-alanine--D-glutamate ligase	6.25851	0.198298	0.057799	-0.109279	0.0248339	0.668039	0.0531502	0.328255	0.875255	0.849438	0.99968	0.000415361	0.908156
NZ_CP011454.1	1002307	1003005	-	CDS	GEMMAAP_RS04175	WP_026850117.1	hypothetical protein	7.98833	-0.0365533	0.0243384	-0.109182	-0.170578	0.15348	0.232116	0.870236	0.940747	0.80156	0.99968	0.292653	0.346075
NZ_CP011454.1	3434817	3436058	-	CDS	GEMMAAP_RS14550	WP_202969143.1	acyl-CoA dehydrogenase family protein	6.8678	0.00811216	0.0441045	-0.109135	-0.0896305	0.0905386	0.107925	0.977932	0.87335	0.794568	0.99968	0.526481	0.691648
NZ_CP011454.1	75273	76619	+	CDS	GEMMAAP_RS00320	WP_026848977.1	hemolysin family protein	5.00629	-0.372737	-0.0253091	-0.109107	-0.0258911	-0.113904	0.188742	0.0861949	0.960912	0.869221	0.99968	0.55831	0.595002
NZ_CP011454.1	4454425	4455909	+	CDS	GEMMAAP_RS18760	WP_158514930.1	Xaa-Pro peptidase family protein	4.03788	0.118175	0.199608	-0.108793	-0.046876	-0.0516526	0.119175	0.721125	0.623617	0.910811	0.99968	0.852567	0.8133
NZ_CP011454.1	384871	385278	+	CDS	GEMMAAP_RS01705	WP_043580143.1	hypothetical protein	6.41146	-0.629197	-0.135782	-0.107996	-0.247174	0.266271	-0.128067	0.00891388	0.690885	0.885988	0.99968	0.203239	0.773323
NZ_CP011454.1	2986243	2986467	+	CDS	GEMMAAP_RS12660	WP_202969128.1	YbdD/YjiX family protein	6.28271	-0.399826	-0.644269	-0.107937	-0.0243049	-0.184882	-0.0579636	0.167311	0.0686676	0.918749	0.99968	0.481016	0.934216
NZ_CP011454.1	2781774	2783189	-	CDS	GEMMAAP_RS11825	WP_043580852.1	S8 family serine peptidase	7.05618	0.256942	-0.14165	-0.107778	-0.1409	0.0430503	-0.078273	0.302189	0.680932	0.889377	0.99968	0.866306	0.877019
NZ_CP011454.1	2852234	2852758	+	CDS	GEMMAAP_RS12100	WP_026849570.1	hypothetical protein	4.91692	3.85185e-05	0.369693	-0.107493	0.310479	-0.334686	-0.0825305	0.99994	0.600034	0.966577	0.99968	0.443853	0.949954
NZ_CP011454.1	4405189	4406208	-	CDS	GEMMAAP_RS18580	WP_026850923.1	flippase-like domain-containing protein	5.31925	-0.284034	0.158332	-0.107364	-0.0925206	-0.0713614	0.197977	0.471224	0.799557	0.94757	0.99968	0.835831	0.732964
NZ_CP011454.1	1724164	1725564	-	CDS	GEMMAAP_RS07160	WP_082821140.1	TldD/PmbA family protein	5.77005	0.326312	0.318487	-0.107344	0.089618	0.193786	0.0328797	0.0726483	0.140962	0.839553	0.99968	0.215644	0.944389
NZ_CP011454.1	3413213	3413506	-	CDS	GEMMAAP_RS14470	WP_026848622.1	hypothetical protein	7.55046	-0.764284	-0.727473	-0.107332	-0.260035	0.288282	0.123572	0.0583255	0.112396	0.949431	0.99968	0.429283	0.884019
NZ_CP011454.1	1764098	1766428	-	CDS	GEMMAAP_RS07335	WP_158514766.1	DUF2723 domain-containing protein	8.54942	-0.129798	-0.0780246	-0.1069	-0.164089	-0.327673	-0.0411826	0.575433	0.804506	0.862007	0.99968	0.0729423	0.935404
NZ_CP011454.1	401600	401875	+	CDS	GEMMAAP_RS01805	WP_026849190.1	metal-binding protein	5.01969	-0.0206926	0.0240426	-0.1068	-0.116451	-0.305451	0.316579	0.961952	0.968768	0.904898	0.99968	0.149052	0.386933
NZ_CP011454.1	4641990	4642607	+	CDS	GEMMAAP_RS19515	WP_026848871.1	PEP-CTERM sorting domain-containing protein	2.73509	0.163565	-0.503431	-0.106735	-0.041314	-0.046645	0.037959	0.703302	0.34793	0.999272	0.99968	0.893242	0.993477
NZ_CP011454.1	1742249	1745893	+	CDS	GEMMAAP_RS20515	WP_026850432.1	hypothetical protein	8.2171	-0.361268	-0.081374	-0.106671	-0.251212	0.147999	-0.316198	0.126621	0.825043	0.883019	0.99968	0.5071	0.38405
NZ_CP011454.1	1498250	1499848	+	CDS	GEMMAAP_RS06170	WP_202969196.1	4-coumarate--CoA ligase family protein	5.37596	0.367863	0.369377	-0.106449	-0.145685	0.0427624	-0.195855	0.0197364	0.053735	0.807484	0.99968	0.779997	0.403002
NZ_CP011454.1	1369998	1371116	-	CDS	GEMMAAP_RS05680	WP_026849880.1	NAD-dependent epimerase/dehydratase family protein	6.93041	-0.458874	-0.599699	-0.106389	0.0728982	-0.551995	-0.511455	0.0275602	0.0179156	0.867524	0.99968	0.00345719	0.0650392
NZ_CP011454.1	4186595	4187131	-	CDS	GEMMAAP_RS17660	WP_053333547.1	DinB family protein	4.11581	-0.248937	-0.333588	-0.10632	-0.0554693	-0.301452	0.0959975	0.369467	0.380035	0.964754	0.99968	0.148846	0.839821
NZ_CP011454.1	1653364	1655325	+	CDS	GEMMAAP_RS06860	WP_043581349.1	hydantoinase/oxoprolinase family protein	6.83926	0.0782884	0.401517	-0.106284	-0.119352	0.589867	0.205974	0.710934	0.0513389	0.830745	0.99968	0.000494777	0.471608
NZ_CP011454.1	3319581	3319820	+	CDS	GEMMAAP_RS14090	WP_145979150.1	heavy-metal-associated domain-containing protein	3.72397	0.0091211	-0.0616736	-0.106276	-0.0967766	-0.712842	0.235211	0.992097	0.94344	0.94412	0.99968	0.0121549	0.669929
NZ_CP011454.1	3916829	3918298	+	CDS	GEMMAAP_RS16545	WP_053333608.1	ABC transporter permease subunit	5.96055	-0.226438	-0.0733604	-0.105625	-0.027876	0.00121771	0.0812024	0.240998	0.822585	0.889377	0.99968	0.995622	0.819219
NZ_CP011454.1	858564	859574	+	CDS	GEMMAAP_RS03635	WP_075071409.1	IS21 family transposase	3.787	0.125068	0.072687	-0.105414	0.0374642	-0.0124063	0.272953	0.67678	0.891723	0.904898	0.99968	0.966482	0.527255
NZ_CP011454.1	2586025	2586855	-	CDS	GEMMAAP_RS10980	WP_053334146.1	polyphosphate kinase	5.56783	-0.0979182	0.0175699	-0.105353	-0.0601985	-0.205142	0.0642262	0.662496	0.968768	0.853372	0.99968	0.209648	0.868647
NZ_CP011454.1	3667046	3669571	-	CDS	GEMMAAP_RS15525	WP_026848473.1	penicillin acylase family protein	5.946	0.0558972	0.122797	-0.105346	-0.00684833	-0.243867	-0.346551	0.824894	0.66233	0.858928	0.99968	0.186393	0.281296
NZ_CP011454.1	1073475	1074587	+	CDS	GEMMAAP_RS04475	WP_026850080.1	PorV/PorQ family protein	8.23556	0.308341	0.441146	-0.105126	0.111528	0.342641	-0.251645	0.294405	0.15751	0.914757	0.99968	0.18182	0.615606
NZ_CP011454.1	2791300	2791809	-	CDS	GEMMAAP_RS11855	WP_026849605.1	asparaginase domain-containing protein	4.67909	-0.886934	-0.342278	-0.104797	-0.278018	0.915198	0.479333	0.0030624	0.356691	0.919548	0.99968	0.000231167	0.194606
NZ_CP011454.1	761374	764292	-	CDS	GEMMAAP_RS03280	WP_026849406.1	Ig-like domain-containing protein	7.06635	0.217445	0.222461	-0.104576	-0.00971902	0.22357	-0.000431725	0.179555	0.227979	0.813955	0.99968	0.114842	0.999165
NZ_CP011454.1	4644910	4645947	-	CDS	GEMMAAP_RS19535	WP_043580052.1	D-alanine--D-alanine ligase	7.4147	-0.288463	-0.340221	-0.104539	-0.117104	-0.318354	0.105649	0.0580469	0.0537298	0.799807	0.99968	0.017381	0.694084
NZ_CP011454.1	1861449	1863422	+	CDS	GEMMAAP_RS07705	WP_026850498.1	ATP-dependent zinc metalloprotease FtsH	9.87533	-0.231078	-0.0721035	-0.10434	-0.139802	0.0616209	-0.390055	0.242051	0.806156	0.849438	0.99968	0.758171	0.164891
NZ_CP011454.1	1900646	1901887	+	CDS	GEMMAAP_RS07870	WP_026850521.1	FtsW/RodA/SpoVE family cell cycle protein	6.22517	-0.0626117	-0.158282	-0.104313	0.133274	0.588326	-0.0530394	0.817517	0.578099	0.871685	0.99968	0.00230367	0.915444
NZ_CP011454.1	3727757	3729025	-	CDS	GEMMAAP_RS15795	WP_053333645.1	GGDEF domain-containing protein	6.37039	-0.0388764	0.122297	-0.104166	-0.0819578	-0.3753	-0.0611294	0.857193	0.572106	0.815123	0.99968	0.00778972	0.845705
NZ_CP011454.1	2187626	2188492	-	CDS	GEMMAAP_RS09210	WP_075071470.1	hypothetical protein	5.42882	0.00385478	0.253537	-0.10381	-0.0503888	0.218363	-0.0810807	0.995923	0.396071	0.890267	0.99968	0.306071	0.876951
NZ_CP011454.1	1954180	1954890	+	CDS	GEMMAAP_RS08090	WP_026850559.1	PTS sugar transporter subunit IIC	6.53028	0.342172	0.343121	-0.103786	-0.00232849	0.476681	0.112845	0.133107	0.192749	0.88741	0.99968	0.0172597	0.796485
NZ_CP011454.1	2349559	2350668	-	CDS	GEMMAAP_RS09975	WP_158514805.1	radical SAM family heme chaperone HemW	6.24391	-0.317038	-0.405863	-0.103193	-0.259375	0.117315	0.087841	0.0823402	0.0644482	0.849272	0.99968	0.480636	0.79685
NZ_CP011454.1	2853361	2856543	+	CDS	GEMMAAP_RS12105	WP_026849569.1	glycosyl hydrolase	5.23635	0.00367012	0.0568938	-0.103144	0.0515578	0.0249349	0.0979162	0.995923	0.901345	0.886609	0.99968	0.912545	0.809056
NZ_CP011454.1	1042665	1045187	-	CDS	GEMMAAP_RS04340	WP_053334268.1	zinc-dependent metalloprotease	5.48465	0.574237	0.288077	-0.103028	-0.168798	0.184517	0.1984	0.00373294	0.212886	0.86148	0.99968	0.250908	0.508509
NZ_CP011454.1	402510	403259	-	CDS	GEMMAAP_RS01815	WP_026849192.1	hypothetical protein	5.80778	-0.271542	-0.0211992	-0.102871	0.0259838	-0.362895	-0.119819	0.200994	0.990126	0.875159	0.99968	0.0396588	0.747052
NZ_CP011454.1	2976832	2977617	-	CDS	GEMMAAP_RS12620	WP_026849490.1	SprT-like domain-containing protein	7.54824	0.111854	0.293676	-0.102688	-0.0325354	-0.633436	0.106975	0.658061	0.232681	0.875492	0.99968	0.00174947	0.792748
NZ_CP011454.1	4540495	4541658	+	CDS	GEMMAAP_RS19130	WP_053334618.1	UvrB/UvrC motif-containing protein	4.95614	-0.245057	-0.20316	-0.102548	-0.0175691	-0.219384	0.209433	0.18278	0.400924	0.86148	0.99968	0.139895	0.428351
NZ_CP011454.1	3876869	3880540	-	CDS	GEMMAAP_RS16405	WP_026848340.1	exodeoxyribonuclease V subunit beta	6.18533	0.188292	0.20121	-0.102245	-0.144739	0.201082	0.0935402	0.51256	0.578099	0.913101	0.99968	0.393789	0.862229
NZ_CP011454.1	2278826	2280430	+	CDS	GEMMAAP_RS09630	WP_053334499.1	serine/threonine protein kinase	5.5029	0.330478	0.265188	-0.102179	-0.043926	-0.339927	0.17128	0.079336	0.246864	0.999272	0.99968	0.0332054	0.583512
NZ_CP011454.1	3638871	3640118	-	CDS	GEMMAAP_RS15370	WP_158514888.1	PDZ domain-containing protein	9.83826	-0.306806	-0.190414	-0.101795	-0.528058	0.325925	-0.575373	0.478658	0.738422	0.95152	0.99968	0.382378	0.351305
NZ_CP011454.1	4204461	4205804	+	CDS	GEMMAAP_RS17730	WP_026848152.1	hypothetical protein	4.71103	-0.0374223	-0.174134	-0.101778	-0.0428731	-0.448309	-0.0657615	0.996133	0.963027	0.902213	0.99968	0.0252602	0.898964
NZ_CP011454.1	508217	509047	+	CDS	GEMMAAP_RS02210	WP_053333966.1	serine O-acetyltransferase	5.91146	-0.40018	-0.256387	-0.101613	0.12831	0.374448	-0.0589284	0.0852793	0.377528	0.892701	0.99968	0.0617807	0.914536
NZ_CP011454.1	4154135	4155586	-	CDS	GEMMAAP_RS17495	WP_043579327.1	aldo/keto reductase	5.5657	0.476317	0.494212	-0.101295	0.213035	0.472314	0.185725	0.0138305	0.0389504	0.86148	0.99968	0.00432242	0.550035
NZ_CP011454.1	3753909	3757073	-	CDS	GEMMAAP_RS15880	WP_026848424.1	efflux RND transporter permease subunit	7.95576	-0.507709	-0.442859	-0.101195	-0.211946	0.358462	-0.371666	0.144435	0.251674	0.94232	0.99968	0.248032	0.520855
NZ_CP011454.1	4581560	4582786	+	CDS	GEMMAAP_RS19295	WP_082821516.1	hypothetical protein	4.62131	0.417255	0.339259	-0.101181	0.128937	0.0480519	0.0766263	0.105487	0.297952	0.914757	0.99968	0.851789	0.882952
NZ_CP011454.1	887522	888841	+	CDS	GEMMAAP_RS03735	WP_026850189.1	MFS transporter	5.62368	-0.0224242	-0.0216972	-0.101114	0.0243644	0.185535	0.176974	0.93667	0.990612	0.849438	0.99968	0.217039	0.530602
NZ_CP011454.1	1626800	1627603	+	CDS	GEMMAAP_RS06750	WP_158514760.1	ubiquinone/menaquinone biosynthesis methyltransferase	4.37696	-0.00915017	-0.282919	-0.100851	0.0399096	-0.0737243	0.0292189	0.992097	0.422872	0.913101	0.99968	0.760372	0.969588
NZ_CP011454.1	2128426	2129262	-	CDS	GEMMAAP_RS08905	WP_082821557.1	LPS export ABC transporter ATP-binding protein	7.41021	-0.254874	-0.210691	-0.100667	0.0234509	-0.38618	-0.293666	0.162917	0.316049	0.849272	0.99968	0.0168193	0.276003
NZ_CP011454.1	4629606	4630712	-	CDS	GEMMAAP_RS19470	WP_053333822.1	alpha/beta hydrolase	4.53013	-0.0600271	0.419431	-0.100477	-0.296372	-0.122251	0.292327	0.885423	0.245456	0.923873	0.99968	0.645174	0.523003
NZ_CP011454.1	48650	49009	+	CDS	GEMMAAP_RS00210	WP_043580066.1	hypothetical protein	4.48263	0.131783	0.0494154	-0.100468	0.111661	0.0650464	0.410921	0.656074	0.976021	0.913101	0.99968	0.884914	0.232813
NZ_CP011454.1	4397792	4398622	-	CDS	GEMMAAP_RS18540	WP_053334585.1	alpha/beta hydrolase	6.36997	-0.449503	-0.601299	-0.100457	-0.0822072	-0.316398	-0.0220886	0.0368676	0.0250332	0.886609	0.99968	0.0901391	0.977423
NZ_CP011454.1	1511204	1512781	-	CDS	GEMMAAP_RS06225	WP_026850274.1	DUF1800 domain-containing protein	7.49735	0.158066	0.192077	-0.100239	0.124148	-0.198919	0.284948	0.367799	0.323077	0.833084	0.99968	0.186562	0.252988
NZ_CP011454.1	3649463	3649771	-	CDS	GEMMAAP_RS15425	WP_026848487.1	YhbY family RNA-binding protein	6.53075	-0.0201579	0.195504	-0.100216	-0.0171674	-0.185239	0.00937946	0.944518	0.371956	0.996542	0.99968	0.23918	0.990898
NZ_CP011454.1	90179	91708	-	CDS	GEMMAAP_RS00375	WP_053333866.1	glycosyltransferase family 39 protein	3.22993	-0.645755	-0.5521	-0.10013	-0.0922733	-0.132435	0.359594	0.0681426	0.252201	0.948562	0.99968	0.681045	0.507979
NZ_CP011454.1	302405	303403	-	CDS	GEMMAAP_RS01350	WP_026849123.1	threonine/serine dehydratase	4.69956	0.164352	0.331923	-0.100057	0.0388189	-0.0400425	-0.220449	0.427598	0.164004	0.871685	0.99968	0.834384	0.453803
NZ_CP011454.1	4490137	4491483	-	CDS	GEMMAAP_RS18915	WP_145979245.1	M1 family metallopeptidase	5.14145	0.0848177	-0.175072	-0.100037	-0.223238	0.120417	0.149273	0.844676	0.620775	0.897616	0.99968	0.5747	0.721543
NZ_CP011454.1	1563705	1564958	+	CDS	GEMMAAP_RS06495	WP_026850315.1	ferredoxin:protochlorophyllide reductase (ATP-dependent) subunit N	6.86231	0.683963	0.249358	-0.099739	0.29251	0.262991	0.138284	0.00218383	0.313051	0.880365	0.99968	0.150347	0.713724
NZ_CP011454.1	1747679	1748944	+	CDS	GEMMAAP_RS07255	WP_053334371.1	hypothetical protein	6.81365	-0.464689	-0.459833	-0.0993123	-0.0726568	0.0145898	-0.198271	0.00639667	0.0213217	0.833592	0.99968	0.937153	0.453023
NZ_CP011454.1	83881	85128	-	CDS	GEMMAAP_RS00355	WP_026848983.1	NAD(P)/FAD-dependent oxidoreductase	5.05525	-3.48781	-2.2693	-0.0990874	-0.345389	-3.63208	-1.80873	0.00126602	0.0580894	0.988163	0.99968	0.00013685	0.113956
NZ_CP011454.1	3392708	3393148	-	CDS	GEMMAAP_RS14380	WP_026848636.1	hypothetical protein	4.54464	0.259562	0.104222	-0.0990586	-0.0516628	0.566622	0.264173	0.388284	0.850696	0.924003	0.99968	0.0192592	0.587272
NZ_CP011454.1	2898673	2899422	-	CDS	GEMMAAP_RS12285	WP_026849543.1	hypothetical protein	5.36845	-0.624665	-0.875987	-0.0990491	0.0870296	-0.994035	-0.623789	0.00967927	0.00861974	0.90846	0.99968	3.62912e-05	0.0436619
NZ_CP011454.1	4246004	4246699	-	CDS	GEMMAAP_RS17915	WP_026848122.1	potassium channel family protein	4.74024	0.245505	0.00101046	-0.0987998	0.0598491	-0.178308	-0.165039	0.347794	0.998292	0.911501	0.99968	0.424495	0.715313
NZ_CP011454.1	93041	93856	-	CDS	GEMMAAP_RS00385	WP_145978924.1	DUF3108 domain-containing protein	5.19979	-0.0826115	-0.178241	-0.0985094	-0.066288	-0.557594	0.172996	0.788402	0.618347	0.908791	0.99968	0.00639826	0.662459
NZ_CP011454.1	3852609	3855839	+	CDS	GEMMAAP_RS16300	WP_026848358.1	PDZ domain-containing protein	6.70617	-0.046512	0.208288	-0.0984736	0.0196366	-0.00801467	-0.0383375	0.824286	0.273397	0.829258	0.99968	0.965512	0.918515
NZ_CP011454.1	1010809	1011906	+	CDS	GEMMAAP_RS04220	WP_026850112.1	hypothetical protein	4.96536	-0.564726	-0.274059	-0.0983647	-0.131899	-0.172247	0.128677	0.00891388	0.309817	0.884441	0.99968	0.330858	0.721543
NZ_CP011454.1	3244228	3245352	+	CDS	GEMMAAP_RS13735	WP_026848735.1	hypothetical protein	5.80623	0.317814	0.160567	-0.0983437	-0.0525508	-0.00465972	-0.0895345	0.100197	0.537664	0.999272	0.99968	0.995622	0.801572
NZ_CP011454.1	1625671	1626111	+	CDS	GEMMAAP_RS06740	WP_026850351.1	vitamin K epoxide reductase family protein	5.51503	-0.497222	-0.28023	-0.0980476	-0.0894714	-0.299336	-0.119161	0.0421485	0.369158	0.913101	0.99968	0.141032	0.78207
NZ_CP011454.1	2464531	2465787	+	CDS	GEMMAAP_RS10510	WP_158514812.1	serine hydrolase	5.79526	-0.00501884	0.0281335	-0.0979679	-0.0454972	-0.280319	-0.00507892	0.992211	0.953916	0.999272	0.99968	0.118641	0.996345
NZ_CP011454.1	2207618	2209414	-	CDS	GEMMAAP_RS09325	WP_053334521.1	RecQ family ATP-dependent DNA helicase	6.11977	-0.387326	-0.190192	-0.0976844	-0.16534	-0.230611	0.130138	0.0328903	0.585918	0.861856	0.99968	0.134565	0.673593
NZ_CP011454.1	2323667	2324107	-	CDS	GEMMAAP_RS09840	WP_026850702.1	hypothetical protein	6.79566	-0.191339	-0.226998	-0.0976142	-0.199112	0.0980748	0.226074	0.348609	0.33321	0.870772	0.99968	0.599807	0.474829
NZ_CP011454.1	4268106	4268711	-	CDS	GEMMAAP_RS17990	WP_053333531.1	DUF305 domain-containing protein	5.35271	-0.160748	-0.317357	-0.0971177	0.170803	0.308129	0.0134699	0.602944	0.374512	0.924003	0.99968	0.161065	0.990898
NZ_CP011454.1	1001869	1002045	-	CDS	GEMMAAP_RS20485	WP_158514727.1	hypothetical protein	9.39736	-0.135035	-0.785091	-0.0970798	-0.315864	0.111377	0.409128	0.856371	0.200486	0.973029	0.99968	0.852783	0.674702
NZ_CP011454.1	3458472	3460628	-	CDS	GEMMAAP_RS14660	WP_053333700.1	serine/threonine protein kinase	8.07344	0.14127	0.335965	-0.0970459	0.0213797	0.577952	0.0578013	0.481351	0.104968	0.86148	0.99968	0.00112879	0.886512
NZ_CP011454.1	3048773	3049600	-	CDS	GEMMAAP_RS12905	WP_026849447.1	hypothetical protein	1.24874	-0.649026	-0.115833	-0.096949	0.418765	0.488657	0.700103	0.218856	0.924965	0.973029	0.99968	0.291523	0.412849
NZ_CP011454.1	3647331	3648128	+	CDS	GEMMAAP_RS15410	WP_026848489.1	alpha/beta hydrolase	5.8334	0.256401	0.117008	-0.0968526	0.108077	-0.0971568	0.167866	0.265077	0.739484	0.896968	0.99968	0.644882	0.662173
NZ_CP011454.1	3415768	3417465	-	CDS	GEMMAAP_RS14485	WP_026848619.1	sensor histidine kinase	7.57644	0.0347516	-0.033371	-0.0967842	0.143517	0.0334788	0.236811	0.905581	0.932757	0.871685	0.99968	0.871736	0.448341
NZ_CP011454.1	1790685	1792358	+	CDS	GEMMAAP_RS07440	WP_026850460.1	hypothetical protein	6.18899	0.239525	0.287578	-0.0967453	-0.0150334	0.210322	0.27259	0.0896177	0.0863262	0.799034	0.99968	0.0826674	0.174172
NZ_CP011454.1	3880537	3883800	-	CDS	GEMMAAP_RS16410	WP_026848339.1	exodeoxyribonuclease V subunit gamma	6.21389	0.299104	0.215085	-0.0965802	-0.0667139	0.0865968	-0.0752247	0.113082	0.352366	0.865444	0.99968	0.618702	0.98831
NZ_CP011454.1	4378445	4379077	+	CDS	GEMMAAP_RS18460	WP_053334578.1	J domain-containing protein	5.67087	0.148474	-0.203703	-0.0964454	0.160256	-0.519211	0.349132	0.499603	0.453825	0.886609	0.99968	0.00402756	0.216891
NZ_CP011454.1	775314	778490	+	CDS	GEMMAAP_RS03315	WP_082821019.1	efflux RND transporter permease subunit	9.09894	-0.0173858	0.620511	-0.0963598	0.0104966	0.577644	-0.121991	0.981064	0.120164	0.948685	0.99968	0.0771079	0.875894
NZ_CP011454.1	3426166	3427167	-	CDS	GEMMAAP_RS14520	WP_026848614.1	hypothetical protein	6.51036	-0.134978	-0.0360204	-0.0960813	-0.0213603	-0.293337	0.0843844	0.527905	0.932757	0.872788	0.99968	0.0775692	0.816999
NZ_CP011454.1	3982106	3983317	-	CDS	GEMMAAP_RS16810	WP_026848282.1	enoyl-CoA hydratase/isomerase family protein	4.62253	0.19274	0.0578763	-0.0957339	0.115916	0.814158	0.233976	0.532312	0.927128	0.927693	0.99968	0.00151499	0.647225
NZ_CP011454.1	1721447	1721761	-	CDS	GEMMAAP_RS07140	WP_026850414.1	hypothetical protein	3.73187	0.118901	-0.374175	-0.0954062	-0.26202	-0.556138	-0.0550882	0.730273	0.344352	0.936875	0.99968	0.0233401	0.950529
NZ_CP011454.1	3155283	3156170	+	CDS	GEMMAAP_RS13345	WP_026848795.1	MlaD family protein	6.02042	-0.0870416	0.0748825	-0.0952781	-0.0257093	0.459189	0.00981407	0.693605	0.806154	0.870772	0.99968	0.00738993	0.992374
NZ_CP011454.1	180210	183119	+	CDS	GEMMAAP_RS00810	WP_053333891.1	protein kinase	7.39396	-0.206093	0.0034767	-0.0952341	-0.0911992	-0.0119675	0.0468379	0.133107	0.991786	0.795505	0.99968	0.941111	0.868575
NZ_CP011454.1	2768923	2770359	+	CDS	GEMMAAP_RS11775	WP_158514835.1	FAD-dependent oxidoreductase	5.49773	0.120219	-0.0441221	-0.0951495	0.260386	-0.614102	-0.0565699	0.527905	0.900653	0.865444	0.99968	0.000228246	0.872568
NZ_CP011454.1	4206318	4209431	+	CDS	GEMMAAP_RS17740	WP_053333544.1	serine/threonine-protein kinase	6.50922	0.0795935	0.0956178	-0.0950012	-0.0408394	0.23401	-0.00665143	0.630202	0.722624	0.809272	0.99968	0.0570296	0.993222
NZ_CP011454.1	51397	52959	+	CDS	GEMMAAP_RS20425	WP_075071362.1	DUF1080 domain-containing protein	5.76412	0.132241	0.219526	-0.0949148	-0.170265	0.130995	0.315364	0.677389	0.548796	0.921162	0.99968	0.595675	0.445944
NZ_CP011454.1	3418385	3420346	+	CDS	GEMMAAP_RS14495	WP_026848617.1	alpha/beta hydrolase	6.28809	0.0700365	0.0411597	-0.094735	0.0603381	-0.320477	0.152956	0.714525	0.892282	0.838887	0.99968	0.0202039	0.56133
NZ_CP011454.1	128912	129319	+	CDS	GEMMAAP_RS00555	WP_202969173.1	MmcQ/YjbR family DNA-binding protein	3.95053	-0.238722	-0.179786	-0.0945333	-0.23964	-0.396065	0.239739	0.441585	0.712708	0.936875	0.99968	0.0769356	0.583332
NZ_CP011454.1	2929681	2930640	-	CDS	GEMMAAP_RS12420	WP_053334070.1	putative 4-hydroxybenzoate polyprenyltransferase	6.14969	0.0445328	0.110178	-0.0944506	-0.141589	0.566637	0.00475874	0.857567	0.683302	0.866733	0.99968	0.00109163	0.996345
NZ_CP011454.1	3898739	3900670	+	CDS	GEMMAAP_RS16480	WP_026848328.1	propionyl-CoA synthetase	5.1736	-0.232094	-0.396555	-0.0941466	0.0314376	-1.12431	-0.745535	0.224175	0.09577	0.874245	0.99968	3.68058e-07	0.00176424
NZ_CP011454.1	4021195	4022541	+	CDS	GEMMAAP_RS16950	WP_026848259.1	TonB-dependent receptor	6.85989	-0.0191031	-0.0515519	-0.0941339	0.00795312	-0.187502	-0.128252	0.936282	0.848252	0.828904	0.99968	0.165772	0.637095
NZ_CP011454.1	3658675	3659634	-	CDS	GEMMAAP_RS15480	WP_043579418.1	carbon-nitrogen hydrolase family protein	5.53397	0.132465	0.164973	-0.0938809	0.0208378	0.291842	-0.144701	0.856752	0.873385	0.973029	0.99968	0.543779	0.903386
NZ_CP011454.1	724811	725974	-	CDS	GEMMAAP_RS03140	WP_053334004.1	ArgE/DapE family deacylase	7.50252	-0.0854288	0.148493	-0.0934934	-0.0291427	-0.322226	0.140626	0.764659	0.634346	0.905459	0.99968	0.112764	0.732964
NZ_CP011454.1	1437578	1439449	+	CDS	GEMMAAP_RS05940	WP_026849837.1	Xaa-Pro dipeptidyl-peptidase	6.41118	-0.462092	-0.30652	-0.0933325	-0.0769385	-0.303721	-0.185783	0.00967927	0.133597	0.86148	0.99968	0.042268	0.508795
NZ_CP011454.1	4537889	4538320	+	CDS	GEMMAAP_RS20705	WP_053334616.1	DUF6524 family protein	4.87939	0.0643117	0.285487	-0.0931045	0.102006	-0.496207	-0.0216156	0.842407	0.528493	0.893614	0.99968	0.00541027	0.996345
NZ_CP011454.1	1075297	1076424	+	CDS	GEMMAAP_RS04485	WP_145978998.1	hypothetical protein	8.49414	0.447693	0.350508	-0.0930269	0.23382	0.384601	-0.404111	0.138965	0.298725	0.936688	0.99968	0.150188	0.381973
NZ_CP011454.1	4599551	4600018	+	CDS	GEMMAAP_RS19350	WP_158514938.1	type VI secretion system tube protein Hcp	7.47176	-0.0346928	-0.320274	-0.0930046	0.121198	0.0717982	-0.0681916	0.933341	0.299546	0.924003	0.99968	0.794215	0.911236
NZ_CP011454.1	2212434	2212787	-	CDS	GEMMAAP_RS09335	WP_145979075.1	hypothetical protein	5.91932	0.14496	-0.0405804	-0.0929604	0.104911	0.223832	-0.0750809	0.63852	0.944536	0.924003	0.99968	0.339011	0.900925
NZ_CP011454.1	448161	450719	-	CDS	GEMMAAP_RS01975	WP_075071598.1	phosphoenolpyruvate--protein phosphotransferase	6.59704	0.156054	0.450697	-0.0929408	0.0969627	0.128261	0.115259	0.421349	0.0427292	0.870612	0.99968	0.435633	0.72303
NZ_CP011454.1	1427634	1428140	+	CDS	GEMMAAP_RS05900	WP_026849843.1	response regulator transcription factor	4.26071	-0.0169643	0.159324	-0.092724	-0.219288	0.0729736	-0.109203	0.977348	0.763685	0.95152	0.99968	0.794215	0.841512
NZ_CP011454.1	4024249	4024743	-	CDS	GEMMAAP_RS16960	WP_026848257.1	DinB family protein	5.10145	0.342174	0.456386	-0.0925433	-0.0575368	0.456203	0.174665	0.174125	0.133597	0.914757	0.99968	0.0255168	0.674702
NZ_CP011454.1	69601	71514	-	CDS	GEMMAAP_RS00300	WP_053333861.1	hypothetical protein	4.67658	0.20568	0.0502404	-0.092452	0.0615261	0.0765475	-0.0441372	0.456884	0.932631	0.924003	0.99968	0.754796	0.947185
NZ_CP011454.1	2189643	2190458	-	CDS	GEMMAAP_RS09225	WP_053334523.1	2-C-methyl-D-erythritol 4-phosphate cytidylyltransferase	6.66912	0.193719	0.428298	-0.0922195	-0.112622	0.649512	0.122307	0.216554	0.0218668	0.834722	0.99968	5.50368e-05	0.66224
NZ_CP011454.1	3474553	3475689	-	CDS	GEMMAAP_RS14700	WP_026848588.1	NAD(P)-binding domain-containing protein	7.952	-0.579019	0.478695	-0.0920263	0.10032	0.417633	0.0320136	0.114821	0.24156	0.95152	0.99968	0.195884	0.980408
NZ_CP011454.1	2771697	2772221	-	CDS	GEMMAAP_RS11790	WP_026849618.1	PepSY domain-containing protein	4.87153	-0.509084	-0.591719	-0.0919389	-0.0710748	-0.850716	-0.192979	0.0649677	0.0896347	0.936875	0.99968	0.0010179	0.691648
NZ_CP011454.1	1837885	1838622	+	CDS	GEMMAAP_RS07620	WP_026850485.1	SDR family NAD(P)-dependent oxidoreductase	5.98651	0.086334	-0.109523	-0.0917215	-0.00985813	0.121155	0.232449	0.652306	0.88027	0.849438	0.99968	0.408517	0.340645
NZ_CP011454.1	3133789	3135441	+	CDS	GEMMAAP_RS13280	WP_026848804.1	serine/threonine protein kinase	1.35921	0.716746	-0.554455	-0.0916972	-0.653361	-0.215145	0.373298	0.219278	0.620011	0.973029	0.99968	0.674322	0.693722
NZ_CP011454.1	2282105	2283289	-	CDS	GEMMAAP_RS09645	WP_053334498.1	1-deoxy-D-xylulose-5-phosphate reductoisomerase	7.64776	-0.335335	-0.0369893	-0.091611	-0.229915	0.358796	-0.0519721	0.0913311	0.925004	0.877261	0.99968	0.0396588	0.910232
NZ_CP011454.1	2770754	2771578	-	CDS	GEMMAAP_RS11785	WP_158514836.1	MBL fold metallo-hydrolase	5.32066	-0.0334605	0.0538921	-0.0915871	0.0214003	-0.539618	-0.275561	0.919852	0.903527	0.900652	0.99968	0.00661179	0.431907
NZ_CP011454.1	1210123	1210788	+	CDS	GEMMAAP_RS05000	WP_043581057.1	hypothetical protein	4.34061	-0.0175357	0.00241178	-0.0914219	-0.0470883	0.434311	0.55308	0.979529	0.998154	0.953012	0.99968	0.111115	0.220999
NZ_CP011454.1	2174135	2174848	-	CDS	GEMMAAP_RS09135	WP_053334529.1	c-type cytochrome	5.96429	-0.0313506	0.0379771	-0.0913528	0.110713	-0.0539599	0.159762	0.914829	0.971674	0.882143	0.99968	0.778189	0.629414
NZ_CP011454.1	3183310	3185274	+	CDS	GEMMAAP_RS13470	WP_026848774.1	acetate--CoA ligase	5.17034	0.308728	0.190724	-0.0912916	0.176955	-0.259752	-0.172605	0.131108	0.492419	0.892701	0.99968	0.125599	0.610058
NZ_CP011454.1	3271042	3272475	-	CDS	GEMMAAP_RS13850	WP_082821328.1	alpha-L-fucosidase	5.33717	0.185332	0.109803	-0.0911403	0.0541308	-0.32175	0.0430784	0.231884	0.621633	0.838433	0.99968	0.0122152	0.892842
NZ_CP011454.1	2970103	2971311	-	CDS	GEMMAAP_RS12595	WP_179947322.1	acyl-CoA dehydrogenase family protein	7.95045	-0.231658	-0.424268	-0.0908574	-0.141415	-0.224271	-0.0528515	0.263948	0.065187	0.887417	0.99968	0.217186	0.910232
NZ_CP011454.1	1509859	1511172	-	CDS	GEMMAAP_RS06220	WP_053334325.1	DUF1501 domain-containing protein	7.09125	0.576395	0.333835	-0.0908389	0.152997	0.14128	0.297732	0.00306741	0.108011	0.871685	0.99968	0.402877	0.275558
NZ_CP011454.1	2444837	2444953	-	CDS	GEMMAAP_RS10380	WP_012683466.1	50S ribosomal protein L36	7.13163	-0.124279	0.071405	-0.0906355	-0.281704	1.12391	0.173901	0.659176	0.86746	0.913101	0.99968	1.69329e-05	0.693722
NZ_CP011454.1	246166	247605	+	CDS	GEMMAAP_RS01060	WP_053333903.1	insulinase family protein	6.15376	-0.824422	-0.571013	-0.090558	-0.123245	-0.641565	-0.51247	0.00272204	0.0669111	0.927693	0.99968	0.00546362	0.163199
NZ_CP011454.1	2673546	2674769	+	CDS	GEMMAAP_RS11405	WP_026849674.1	peptidoglycan DD-metalloendopeptidase family protein	5.5262	0.103979	0.0626569	-0.0904734	-0.0461157	0.768808	0.139108	0.624104	0.979891	0.873242	0.99968	4.66859e-05	0.67476
NZ_CP011454.1	178766	180127	+	CDS	GEMMAAP_RS00805	WP_026849040.1	hypothetical protein	8.03339	-0.153472	0.051602	-0.0900749	0.00195807	0.0205097	0.0413345	0.420239	0.870925	0.869221	0.99968	0.917632	0.922536
NZ_CP011454.1	3681966	3683077	-	CDS	GEMMAAP_RS15575	WP_145979171.1	IS3 family transposase	4.90455	0.301581	0.220139	-0.0900246	0.174077	-0.234766	0.110324	0.475889	0.719382	0.961084	0.99968	0.520649	0.900925
NZ_CP011454.1	3650561	3650974	-	CDS	GEMMAAP_RS15435	WP_026848486.1	hypothetical protein	7.53965	-0.0869304	-0.0630577	-0.0896537	-0.0117096	-0.250431	-0.0298123	0.728526	0.861924	0.892701	0.99968	0.177573	0.959886
NZ_CP011454.1	1289029	1290048	+	CDS	GEMMAAP_RS05410	WP_053334233.1	MoxR family ATPase	6.36695	0.204141	0.223905	-0.0893666	-0.121019	0.628086	0.152987	0.263832	0.297952	0.871685	0.99968	0.000375975	0.640121
NZ_CP011454.1	445449	446303	-	CDS	GEMMAAP_RS01965	WP_053333945.1	Cof-type HAD-IIB family hydrolase	5.1439	0.38595	0.409176	-0.0892647	-0.0180353	0.64917	0.0326081	0.119152	0.173406	0.91858	0.99968	0.00233954	0.963112
NZ_CP011454.1	3099645	3100823	+	CDS	GEMMAAP_RS13140	WP_026848824.1	bifunctional glutamate N-acetyltransferase/amino-acid acetyltransferase ArgJ	7.27758	0.0428542	0.265756	-0.0890841	0.0157997	-0.00379293	0.259497	0.864852	0.210568	0.874245	0.99968	0.98536	0.347372
NZ_CP011454.1	1263588	1264892	+	CDS	GEMMAAP_RS05295	WP_026849944.1	PilT/PilU family type 4a pilus ATPase	7.97551	-0.117915	0.198251	-0.0889781	-0.117296	-0.0903759	0.0708663	0.741714	0.600034	0.938926	0.99968	0.766242	0.917603
NZ_CP011454.1	4542327	4543856	+	CDS	GEMMAAP_RS19140	WP_053334619.1	HAMP domain-containing protein	5.65821	0.0497185	-0.167752	-0.0887987	0.041305	0.102699	0.149992	0.860074	0.620775	0.897616	0.99968	0.58525	0.67105
NZ_CP011454.1	2923098	2924177	+	CDS	GEMMAAP_RS12385	WP_053334072.1	M48 family metallopeptidase	8.589	-0.646214	-0.511263	-0.088632	-0.306969	0.158193	-0.0274307	0.15568	0.317545	0.970298	0.99968	0.726728	0.98831
NZ_CP011454.1	3703182	3703625	-	CDS	GEMMAAP_RS15665	WP_053333649.1	pilus assembly protein	7.31071	-0.0248331	-0.0671569	-0.0885214	-0.0790163	-0.17552	-0.253167	0.964277	0.763685	0.837745	0.99968	0.177867	0.231917
NZ_CP011454.1	3165268	3166209	+	CDS	GEMMAAP_RS13370	WP_082821316.1	heme o synthase	7.55686	-0.0109266	-0.133368	-0.0884118	-0.0530527	0.0298718	0.0376566	0.965824	0.46847	0.836867	0.99968	0.852783	0.913254
NZ_CP011454.1	2418972	2420318	-	CDS	GEMMAAP_RS10275	WP_145979088.1	hypothetical protein	9.97422	-0.499322	-0.423153	-0.0881951	-0.131006	-0.299819	-0.501001	0.0234125	0.0784912	0.898526	0.99968	0.122277	0.0949595
NZ_CP011454.1	2538013	2538702	+	CDS	GEMMAAP_RS10800	WP_043580719.1	Ig-like domain-containing protein	9.09414	0.0138944	-0.217958	-0.0880996	-0.0491174	-0.408706	-0.0450518	0.972534	0.400159	0.905381	0.99968	0.0398763	0.935404
NZ_CP011454.1	2196437	2198404	-	CDS	GEMMAAP_RS09260	WP_158514795.1	hypothetical protein	7.58278	-0.235988	-0.0512577	-0.0880203	-0.0733555	0.144146	-0.130738	0.260837	0.891895	0.893614	0.99968	0.452717	0.726411
NZ_CP011454.1	2416485	2417111	-	CDS	GEMMAAP_RS10265	WP_145979087.1	DNA repair protein RadC	6.90532	-0.130171	-0.128671	-0.0879778	-0.145448	0.0749718	0.411818	0.658012	0.730026	0.920802	0.99968	0.76775	0.267078
NZ_CP011454.1	4541639	4542319	+	CDS	GEMMAAP_RS19135	WP_026851005.1	response regulator transcription factor	4.758	-0.200957	-0.000262052	-0.0876129	-0.0417798	-0.30785	0.0796998	0.434035	0.999304	0.920802	0.99968	0.123106	0.867594
NZ_CP011454.1	485008	486333	-	CDS	GEMMAAP_RS02100	WP_145978958.1	hypothetical protein	5.96908	-0.00151947	-0.128933	-0.0873863	-0.2566	-0.907846	-0.529412	0.99891	0.771624	0.938926	0.99968	0.000452498	0.164047
NZ_CP011454.1	1236783	1238117	+	CDS	GEMMAAP_RS05120	WP_026849976.1	hypothetical protein	6.22921	-0.0360396	-0.223363	-0.087361	0.0485208	-0.165903	0.108052	0.870236	0.431069	0.858357	0.99968	0.236945	0.702787
NZ_CP011454.1	1238114	1239658	+	CDS	GEMMAAP_RS05125	WP_026849975.1	phage adsorption protein NrfB	6.60653	0.310789	0.291497	-0.0871423	0.012864	0.400543	0.171248	0.109687	0.189999	0.886609	0.99968	0.018733	0.611709
NZ_CP011454.1	1643047	1644534	+	CDS	GEMMAAP_RS06815	WP_026850363.1	aldehyde dehydrogenase family protein	7.42187	-0.16128	-0.0462712	-0.0871102	-0.0831387	-0.1343	0.0728226	0.356296	0.876481	0.994205	0.99968	0.380768	0.82055
NZ_CP011454.1	4183081	4183926	-	CDS	GEMMAAP_RS17640	WP_053333549.1	creatininase family protein	3.99546	0.310171	-0.155062	-0.0868638	0.0913376	0.187336	-0.176528	0.338762	0.868103	0.965288	0.99968	0.450684	0.726158
NZ_CP011454.1	931309	932223	-	CDS	GEMMAAP_RS03895	WP_026850164.1	ABC transporter permease	5.50929	-0.142874	-0.121254	-0.0868086	-0.0983309	-0.423326	0.0177407	0.440313	0.63602	0.874901	0.99968	0.0049575	0.975743
NZ_CP011454.1	3554879	3555805	+	CDS	GEMMAAP_RS15045	WP_026848541.1	phosphodiester glycosidase family protein	5.52717	0.167362	0.12325	-0.0867099	-0.0311962	0.407148	-0.217445	0.440037	0.685236	0.918749	0.99968	0.0232636	0.538117
NZ_CP011454.1	591847	592926	-	CDS	GEMMAAP_RS02630	WP_026849314.1	dihydrodipicolinate synthetase	7.00949	0.262265	1.06847	-0.0866366	0.181317	0.042122	-0.0827326	0.616538	0.0483443	0.971554	0.99968	0.93389	0.945631
NZ_CP011454.1	370892	372187	+	CDS	GEMMAAP_RS01635	WP_026849166.1	metal-dependent hydrolase	5.9264	-0.135468	0.216335	-0.0866123	-0.0712466	-0.220927	0.427363	0.74688	0.669034	0.953238	0.99968	0.464793	0.388313
NZ_CP011454.1	4031507	4031923	+	CDS	GEMMAAP_RS16990	WP_145979206.1	TonB-dependent receptor plug domain-containing protein	4.53446	-0.0777482	-0.12738	-0.0865805	-0.0391691	-0.283553	-0.0151832	0.832901	0.798336	0.942304	0.99968	0.201315	0.988788
NZ_CP011454.1	101529	102860	+	CDS	GEMMAAP_RS00420	WP_158514668.1	serine hydrolase	6.2264	0.209901	0.325208	-0.0862167	0.0467058	0.289959	0.297362	0.166484	0.0741688	0.84074	0.99968	0.0234345	0.147943
NZ_CP011454.1	1492099	1493262	+	CDS	GEMMAAP_RS06140	WP_026850262.1	hypothetical protein	6.46937	0.0248155	0.0338435	-0.0856646	0.101189	-0.118768	-0.0379902	0.930895	0.932631	0.883864	0.99968	0.47611	0.929161
NZ_CP011454.1	234557	235504	+	CDS	GEMMAAP_RS01020	WP_082820956.1	creatininase family protein	4.9665	-0.00898669	-0.0740216	-0.0855647	0.236078	0.214582	0.0919605	0.988442	0.891723	0.94232	0.99968	0.328775	0.915444
NZ_CP011454.1	2030495	2033326	-	CDS	GEMMAAP_RS08430	WP_145979063.1	hypothetical protein	7.50905	-0.286658	-0.182055	-0.0854783	-0.108245	0.146632	-0.0800953	0.184848	0.49198	0.905381	0.99968	0.47055	0.857263
NZ_CP011454.1	1646320	1646820	+	CDS	GEMMAAP_RS06830	WP_026850366.1	YajQ family cyclic di-GMP-binding protein	6.17464	0.0287469	-0.0925059	-0.0852806	-0.0495721	0.0135392	-0.127063	0.964277	0.739895	0.885643	0.99968	0.94695	0.700586
NZ_CP011454.1	1537666	1538334	+	CDS	GEMMAAP_RS06370	WP_053334330.1	CDP-alcohol phosphatidyltransferase family protein	6.61244	0.262958	-0.162475	-0.0852087	0.033128	0.190468	-0.0789763	0.208525	0.551065	0.904898	0.99968	0.306938	0.854038
NZ_CP011454.1	4460067	4460540	-	CDS	GEMMAAP_RS20695	WP_026850956.1	DUF1269 domain-containing protein	6.34302	-0.316759	-0.188583	-0.0850957	-0.012817	-0.479423	-0.0808241	0.152717	0.529489	0.973029	0.99968	0.0102045	0.845705
NZ_CP011454.1	946535	947509	+	CDS	GEMMAAP_RS03930	WP_158514724.1	DMT family transporter	5.87318	-0.104978	-0.0325516	-0.0846312	-0.0364235	-0.305491	-0.115328	0.626801	0.937015	0.889377	0.99968	0.0602911	0.73027
NZ_CP011454.1	4159818	4160567	-	CDS	GEMMAAP_RS17515	WP_053333551.1	LytTR family DNA-binding domain-containing protein	5.41388	0.0256715	0.0399123	-0.084284	-0.0192899	-0.295275	0.193687	0.951778	0.947896	0.935651	0.99968	0.164014	0.646991
NZ_CP011454.1	4138202	4138885	+	CDS	GEMMAAP_RS17445	WP_026848195.1	hypothetical protein	6.01485	-0.311089	-0.301561	-0.0839646	0.0621581	0.0695463	0.102159	0.0604279	0.127454	0.871685	0.99968	0.664223	0.729097
NZ_CP011454.1	1989464	1989910	+	CDS	GEMMAAP_RS08245	WP_158514781.1	DUF2202 domain-containing protein	1.87293	0.00277048	0.295555	-0.083894	-0.557553	-0.615254	0.0311489	0.999081	0.772108	0.973029	0.99968	0.119683	0.987802
NZ_CP011454.1	1366362	1368695	+	CDS	GEMMAAP_RS05670	WP_053334214.1	hypothetical protein	5.92343	-0.0391828	-0.0193356	-0.0836212	-0.021183	0.0194488	-0.177372	0.904994	0.96242	0.875492	0.99968	0.916533	0.528113
NZ_CP011454.1	2400522	2401388	-	CDS	GEMMAAP_RS10190	WP_053334467.1	tol-pal system protein YbgF	8.15416	-0.103168	0.0106923	-0.0836198	-0.0272544	-0.10483	-0.364509	0.660494	0.980059	0.897281	0.99968	0.586466	0.212918
NZ_CP011454.1	2319203	2319424	-	CDS	GEMMAAP_RS09815	WP_026850705.1	exodeoxyribonuclease VII small subunit	5.90067	-0.199376	-0.23266	-0.0835584	-0.243203	0.146318	0.248915	0.359128	0.380289	0.90846	0.99968	0.44712	0.46572
NZ_CP011454.1	3760830	3762062	+	CDS	GEMMAAP_RS15900	WP_026848421.1	XdhC family protein	7.07005	-0.104218	-0.0780778	-0.0834862	-0.128485	-0.16488	0.145105	0.638424	0.987047	0.890291	0.99968	0.328798	0.659863
NZ_CP011454.1	3394514	3394702	+	CDS	GEMMAAP_RS14390	WP_026848634.1	hypothetical protein	5.37227	-0.254834	-0.28592	-0.0834797	-0.143126	-0.301906	0.306825	0.409739	0.480417	0.948562	0.99968	0.211885	0.485311
NZ_CP011454.1	334965	336332	+	CDS	GEMMAAP_RS01480	WP_053333922.1	type I glutamate--ammonia ligase	7.89141	0.220988	0.641354	-0.0833567	0.0338714	-0.260554	0.0908622	0.344204	0.0173837	0.914757	0.99968	0.189928	0.835671
NZ_CP011454.1	1441414	1442367	-	CDS	GEMMAAP_RS05950	WP_043581023.1	alpha/beta hydrolase	4.82133	0.270092	0.227657	-0.0829652	0.0289857	-0.169071	0.110944	0.260833	0.477413	0.925543	0.99968	0.412653	0.796773
NZ_CP011454.1	362737	363690	+	CDS	GEMMAAP_RS01600	WP_043580136.1	hypothetical protein	7.8879	0.0156351	0.535987	-0.0829398	-0.0557799	-0.0786925	0.0758494	0.972024	0.0513389	0.924003	0.99968	0.74734	0.884019
NZ_CP011454.1	1283306	1285999	-	CDS	GEMMAAP_RS05385	WP_053334235.1	TonB-dependent receptor	4.32506	-0.332156	-0.595879	-0.0826851	0.0733685	0.0100653	-0.197336	0.1866	0.0723094	0.936875	0.99968	0.970506	0.647911
NZ_CP011454.1	1175169	1175708	+	CDS	GEMMAAP_RS04850	WP_075071430.1	phosphoribosyltransferase domain-containing protein	6.86881	-0.376316	-0.247191	-0.0825833	-0.0837539	-0.797203	-0.316198	0.0845357	0.347559	0.914088	0.99968	0.00018127	0.322575
NZ_CP011454.1	2321577	2323163	-	CDS	GEMMAAP_RS09830	WP_053334488.1	ribonuclease Y	7.62209	-0.00163588	0.0830986	-0.0825545	-0.0483789	0.396722	0.08706	0.997069	0.763685	0.886609	0.99968	0.0162924	0.809282
NZ_CP011454.1	151568	151927	+	CDS	GEMMAAP_RS00680	WP_026849024.1	hypothetical protein	4.91844	-0.547912	-0.774057	-0.0823597	-0.078885	0.328966	-0.105854	0.100197	0.072974	0.956653	0.99968	0.236712	0.875894
NZ_CP011454.1	4053836	4054684	+	CDS	GEMMAAP_RS17100	WP_026848240.1	N-acyl homoserine lactonase family protein	4.97907	0.159508	-0.0326222	-0.0823428	0.299386	-0.122525	0.20692	0.574366	0.957088	0.939137	0.99968	0.576213	0.607511
NZ_CP011454.1	1885605	1886675	+	CDS	GEMMAAP_RS07805	WP_026850511.1	chemotaxis-specific protein-glutamate methyltransferase CheB	5.83023	0.602957	0.260757	-0.0822121	-0.0667987	0.593704	0.116766	0.00940503	0.363548	0.919249	0.99968	0.00389582	0.788779
NZ_CP011454.1	1368662	1369897	+	CDS	GEMMAAP_RS05675	WP_053334213.1	lactonase family protein	5.47023	0.0498678	-0.0554922	-0.0814675	0.000468521	-0.0403126	-0.01992	0.814291	0.96378	0.871685	0.99968	0.807636	0.96725
NZ_CP011454.1	999644	1000669	-	CDS	GEMMAAP_RS04165	WP_026850119.1	L-threonine 3-dehydrogenase	5.43544	-0.208979	-0.165633	-0.0813752	0.176353	-0.21166	-0.0494072	0.356862	0.932631	0.918749	0.99968	0.267954	0.922842
NZ_CP011454.1	4220859	4223762	-	CDS	GEMMAAP_RS17800	WP_053333540.1	serine/threonine protein kinase	6.04828	0.0467694	0.12499	-0.0812153	-0.105277	-0.239591	0.242973	0.834689	0.595041	0.876114	0.99968	0.104641	0.341713
NZ_CP011454.1	2637137	2637424	-	CDS	GEMMAAP_RS11245	WP_145979103.1	hypothetical protein	4.75128	-0.103263	-0.331804	-0.0810002	-0.174991	-0.0427899	0.161028	0.755378	0.338316	0.942693	0.99968	0.884444	0.759707
NZ_CP011454.1	4114138	4116726	+	CDS	GEMMAAP_RS17360	WP_053333561.1	zinc-dependent metalloprotease	5.72805	0.245655	0.0638627	-0.0805245	0.0118964	0.0484668	0.315678	0.463955	0.925234	0.953238	0.99968	0.87698	0.524958
NZ_CP011454.1	256323	257108	-	CDS	GEMMAAP_RS01105	WP_026849084.1	imidazole glycerol phosphate synthase subunit HisF	6.35939	0.217441	0.145023	-0.0803669	0.0299076	0.594912	0.326253	0.291354	0.596809	0.906061	0.99968	0.0017944	0.292889
NZ_CP011454.1	3522783	3524507	+	CDS	GEMMAAP_RS14865	WP_053333688.1	hypothetical protein	4.96727	0.247556	0.0710735	-0.0803093	0.0140406	0.590847	0.0843976	0.289393	0.87335	0.924003	0.99968	0.00337605	0.943998
NZ_CP011454.1	2568304	2569953	-	CDS	GEMMAAP_RS10930	WP_202969116.1	amidohydrolase family protein	5.46486	0.25701	0.225267	-0.0800392	0.0682197	0.203918	-0.17163	0.222103	0.3986	0.91858	0.99968	0.248032	0.633202
NZ_CP011454.1	1646886	1648310	+	CDS	GEMMAAP_RS06835	WP_053334351.1	30S ribosomal protein S12 methylthiotransferase RimO	7.00151	0.0714452	0.0237936	-0.0800369	-0.136744	-0.151309	0.146325	0.704212	0.941913	0.866733	0.99968	0.278844	0.584736
NZ_CP011454.1	3847052	3848431	-	CDS	GEMMAAP_RS16270	WP_026848364.1	FAD-binding oxidoreductase	5.42882	0.122501	-0.151282	-0.0800262	0.0590508	0.142155	0.0759186	0.602213	0.611885	0.909897	0.99968	0.44712	0.857225
NZ_CP011454.1	451357	453588	+	CDS	GEMMAAP_RS01990	WP_053333946.1	serine/threonine-protein kinase	6.68126	-0.00763399	0.0625755	-0.0800063	-0.15517	-0.38946	0.160415	0.987033	0.8655	0.999272	0.99968	0.0258772	0.646991
NZ_CP011454.1	4365866	4366426	-	CDS	GEMMAAP_RS18400	WP_145979234.1	GNAT family N-acetyltransferase	7.30571	0.0281282	0.243979	-0.0799587	-0.0121996	-0.105919	0.126134	0.923927	0.271795	0.897281	0.99968	0.553201	0.713724
NZ_CP011454.1	1841052	1844351	+	CDS	GEMMAAP_RS07635	WP_026850488.1	S41 family peptidase	6.36651	0.173252	0.095865	-0.0799552	0.0704496	-0.0194715	-0.0885967	0.420239	0.763685	0.911708	0.99968	0.955423	0.817527
NZ_CP011454.1	3757081	3758250	-	CDS	GEMMAAP_RS15885	WP_053333640.1	efflux RND transporter periplasmic adaptor subunit	7.06745	-0.631521	-0.340138	-0.0799503	-0.203396	0.482286	-0.140089	0.0580469	0.384378	0.955486	0.99968	0.0995111	0.829921
NZ_CP011454.1	1338648	1339088	-	CDS	GEMMAAP_RS05600	WP_026849892.1	DUF2721 domain-containing protein	4.29598	0.193939	0.127989	-0.0797905	0.0946154	0.621091	0.0594792	0.562922	0.807614	0.953012	0.99968	0.0147165	0.935404
NZ_CP011454.1	2560361	2560675	+	CDS	GEMMAAP_RS20560	WP_158514820.1	FMN-binding protein	4.2809	0.416094	-0.0835823	-0.0797518	0.0657072	-0.375572	0.224895	0.250593	0.922576	0.967604	0.99968	0.181714	0.690175
NZ_CP011454.1	3843404	3845035	-	CDS	GEMMAAP_RS16255	WP_053333621.1	prolipoprotein diacylglyceryl transferase	3.04737	-0.027468	-0.0704016	-0.0795924	0.0595512	-0.216546	0.0842483	0.972024	0.947896	0.971629	0.99968	0.541752	0.925508
NZ_CP011454.1	509060	509977	+	CDS	GEMMAAP_RS02215	WP_026849246.1	cysteine synthase A	6.1281	-0.252367	-0.192259	-0.079567	-0.230256	0.241463	-0.314125	0.247434	0.492416	0.918749	0.99968	0.203239	0.346075
NZ_CP011454.1	1573758	1575203	+	CDS	GEMMAAP_RS06530	WP_026850322.1	BCD family MFS transporter	8.11028	0.18887	0.222902	-0.0795256	0.134595	0.59711	-0.00788108	0.297147	0.26112	0.886459	0.99968	0.000523181	0.993477
NZ_CP011454.1	3992941	3994053	-	CDS	GEMMAAP_RS16860	WP_026848273.1	hypothetical protein	5.35859	0.0335181	-0.228421	-0.0794865	0.0699824	-0.221228	0.241107	0.938956	0.572296	0.950261	0.99968	0.355947	0.595002
NZ_CP011454.1	3731310	3735881	+	CDS	GEMMAAP_RS15805	WP_158514892.1	glutamate synthase large subunit	6.86771	0.0421496	0.118683	-0.0792818	-0.00615994	0.224946	0.186056	0.894839	0.714512	0.918749	0.99968	0.240182	0.623514
NZ_CP011454.1	4083190	4084290	+	CDS	GEMMAAP_RS17220	WP_075071557.1	glycosyltransferase	4.94544	0.467194	0.409256	-0.0792508	0.105838	-0.209047	0.241313	0.0161611	0.0873301	0.905381	0.99968	0.187482	0.376369
NZ_CP011454.1	3957451	3958110	+	CDS	GEMMAAP_RS16700	WP_026848297.1	cyclase family protein	4.701	0.302134	-0.119048	-0.0792065	0.0409249	0.265397	-0.0617278	0.202048	0.763866	0.930528	0.99968	0.182443	0.908156
NZ_CP011454.1	1087458	1090532	+	CDS	GEMMAAP_RS04525	WP_026850070.1	SusC/RagA family TonB-linked outer membrane protein	10.1171	0.414098	0.289424	-0.0791719	0.00294438	-0.398706	0.170141	0.171235	0.400924	0.948562	0.99968	0.135678	0.759707
NZ_CP011454.1	3769771	3770547	+	CDS	GEMMAAP_RS15935	WP_026848416.1	DUF4159 domain-containing protein	5.15724	-0.14029	-0.384961	-0.0787444	-0.233341	0.185602	-0.425698	0.667267	0.279299	0.948562	0.99968	0.46288	0.322575
NZ_CP011454.1	320229	321641	-	CDS	GEMMAAP_RS01425	WP_026849136.1	FAD-binding oxidoreductase	6.9162	0.543048	0.672561	-0.0786242	0.16628	0.388812	0.0290936	0.011585	0.0118851	0.914088	0.99968	0.0365138	0.963271
NZ_CP011454.1	4634795	4635925	-	CDS	GEMMAAP_RS19485	WP_158514940.1	Fic family protein	4.09994	-0.0817988	-0.00461205	-0.0783228	0.0241698	0.0877179	0.0962817	0.972549	0.995674	0.945254	0.99968	0.714072	0.84318
NZ_CP011454.1	2653405	2654805	-	CDS	GEMMAAP_RS11325	WP_082821253.1	peptidylprolyl isomerase	8.65708	-0.547882	-0.392404	-0.0780913	-0.380272	0.0366814	-0.639625	0.0727547	0.244536	0.95152	0.99968	0.913842	0.139307
NZ_CP011454.1	2985570	2986079	-	CDS	GEMMAAP_RS12655	WP_026849484.1	hypothetical protein	3.39065	0.271865	-0.381241	-0.0777473	-0.493411	-0.803669	-0.481887	0.377123	0.363266	0.999272	0.99968	0.00318813	0.28618
NZ_CP011454.1	2478684	2480219	-	CDS	GEMMAAP_RS10575	WP_053334173.1	HAMP domain-containing histidine kinase	6.59198	0.245518	0.369368	-0.077559	-0.102348	0.655196	0.209184	0.114558	0.0452032	0.869221	0.99968	3.74192e-05	0.374705
NZ_CP011454.1	586464	587135	-	CDS	GEMMAAP_RS02595	WP_158514697.1	HAMP domain-containing histidine kinase	8.35119	0.193623	0.0652999	-0.0775485	0.116347	0.429252	0.16573	0.275573	0.806156	0.886609	0.99968	0.00675263	0.580126
NZ_CP011454.1	934155	936410	+	CDS	GEMMAAP_RS03905	WP_026850162.1	BamA/TamA family outer membrane protein	7.07424	0.082769	-0.00742013	-0.0775271	-0.0620283	0.108726	0.0493029	0.655162	0.9838	0.871685	0.99968	0.46295	0.886512
NZ_CP011454.1	3121923	3122564	-	CDS	GEMMAAP_RS13220	WP_053333775.1	MOSC N-terminal beta barrel domain-containing protein	3.00452	0.116422	0.0562627	-0.0774739	-0.424839	-0.330562	-0.122669	0.992211	0.95074	0.971554	0.99968	0.237325	0.851495
NZ_CP011454.1	441865	444354	+	CDS	GEMMAAP_RS01955	WP_158514690.1	serine/threonine-protein kinase	6.63118	-0.0198705	0.16588	-0.0773748	0.00421397	0.444031	0.0679052	0.947321	0.455463	0.890291	0.99968	0.00508192	0.922536
NZ_CP011454.1	4558870	4560303	-	CDS	GEMMAAP_RS19200	WP_026851016.1	carboxypeptidase regulatory-like domain-containing protein	6.22443	-0.015718	0.156017	-0.0769726	-0.055804	0.0353236	-0.0729245	0.967545	0.609265	0.924003	0.99968	0.87698	0.875166
NZ_CP011454.1	1872428	1873447	+	CDS	GEMMAAP_RS07750	WP_075071460.1	RluA family pseudouridine synthase	7.09629	0.0887692	0.210781	-0.0763521	0.0145037	0.477781	-0.125192	0.652306	0.278573	0.886609	0.99968	0.00240189	0.679219
NZ_CP011454.1	2717557	2719065	-	CDS	GEMMAAP_RS11580	WP_026849647.1	lytic transglycosylase domain-containing protein	5.08443	-0.259505	0.0771482	-0.0763488	-0.153637	-0.448559	-0.0148322	0.16766	0.800539	0.907785	0.99968	0.00744805	0.990898
NZ_CP011454.1	3533380	3533850	+	CDS	GEMMAAP_RS14925	WP_053333685.1	OsmC family protein	5.87692	0.109666	0.0972862	-0.0758834	-0.199587	-0.182008	-0.109741	0.582919	0.719016	0.896968	0.99968	0.240736	0.728622
NZ_CP011454.1	1904516	1905280	+	CDS	GEMMAAP_RS07885	WP_026850524.1	FtsQ-type POTRA domain-containing protein	7.50908	-0.199548	-0.262013	-0.0750019	-0.238388	-0.0755932	0.159412	0.359031	0.276475	0.918749	0.99968	0.717563	0.664009
NZ_CP011454.1	1409600	1410844	-	CDS	GEMMAAP_RS05850	WP_043581032.1	RagB/SusD family nutrient uptake outer membrane protein	8.56169	0.519565	-0.228843	-0.0749933	-0.165052	0.456924	-0.777437	0.104506	0.565495	0.954965	0.99968	0.103823	0.0680113
NZ_CP011454.1	463097	465721	-	CDS	GEMMAAP_RS02030	WP_082820987.1	serine/threonine-protein kinase	4.97068	0.431311	0.508917	-0.0746359	0.0661843	0.101191	0.0837311	0.0233458	0.0326819	0.90846	0.99968	0.544294	0.810003
NZ_CP011454.1	3551063	3552367	+	CDS	GEMMAAP_RS15025	WP_053333680.1	adenosylmethionine--8-amino-7-oxononanoate transaminase	6.15313	0.201841	0.0803192	-0.074291	-0.0482113	0.335158	0.0194479	0.308427	0.799557	0.953238	0.99968	0.0397011	0.977423
NZ_CP011454.1	219865	221451	-	CDS	GEMMAAP_RS00965	WP_026849062.1	amidase	5.38133	0.272546	0.0833967	-0.0738817	0.0684794	-0.10465	0.119219	0.184337	0.813038	0.918749	0.99968	0.569408	0.73568
NZ_CP011454.1	2866069	2867877	+	CDS	GEMMAAP_RS12135	WP_026849565.1	2-oxoacid:acceptor oxidoreductase subunit alpha	6.84066	0.108484	-0.0448377	-0.0738017	0.0596588	0.119036	-0.156021	0.644478	0.910661	0.917772	0.99968	0.52072	0.655851
NZ_CP011454.1	2100446	2101183	+	CDS	GEMMAAP_RS08775	WP_053334548.1	lysophospholipid acyltransferase family protein	5.99367	-0.241936	-0.00797816	-0.0736364	-0.358266	0.255272	-0.198681	0.417896	0.991151	0.953012	0.99968	0.333613	0.722844
NZ_CP011454.1	1170870	1172756	-	CDS	GEMMAAP_RS04830	WP_158514738.1	long-chain fatty acid--CoA ligase	7.2491	-0.145558	-0.0599663	-0.0735845	0.0582944	0.33183	-0.100493	0.454244	0.846533	0.905381	0.99968	0.037679	0.76256
NZ_CP011454.1	1307625	1308779	+	CDS	GEMMAAP_RS05485	WP_026849910.1	aminotransferase class I/II-fold pyridoxal phosphate-dependent enzyme	6.43222	0.122998	0.257517	-0.0735114	-0.0138522	-0.421507	0.200487	0.599955	0.300179	0.919249	0.99968	0.0169951	0.547246
NZ_CP011454.1	474617	475156	+	CDS	GEMMAAP_RS02065	WP_053333957.1	YeeE/YedE family protein	2.21251	-0.547667	-0.555844	-0.0734932	0.224266	0.230114	-0.369413	0.289393	0.467898	0.978517	0.99968	0.551895	0.646991
NZ_CP011454.1	1158017	1158970	-	CDS	GEMMAAP_RS04775	WP_145979008.1	hypothetical protein	6.5911	-0.203862	-0.463403	-0.0734304	-0.158978	-0.802975	0.00457414	0.332162	0.0568618	0.923988	0.99968	9.86006e-05	0.996345
NZ_CP011454.1	4167017	4168132	-	CDS	GEMMAAP_RS17555	WP_026848178.1	exo-alpha-sialidase	6.62183	-0.0881012	-0.0420837	-0.0733988	-0.0530946	-0.482364	0.0555927	0.652306	0.898952	0.892701	0.99968	0.00167606	0.871995
NZ_CP011454.1	1095281	1096150	+	CDS	GEMMAAP_RS20715	WP_162493363.1	TPM domain-containing protein	7.5569	-0.695829	-0.479261	-0.0733016	-0.264979	0.138946	0.0394432	0.0244904	0.158869	0.955682	0.99968	0.637445	0.964885
NZ_CP011454.1	4120320	4120601	+	CDS	GEMMAAP_RS17370	WP_043579332.1	rhodanese-like domain-containing protein	3.05686	-0.0673851	0.216338	-0.0731998	-0.112628	-0.190319	-0.167831	0.896619	0.680661	0.973029	0.99968	0.515075	0.803079
NZ_CP011454.1	3942503	3944881	+	CDS	GEMMAAP_RS16655	WP_026848304.1	S9 family peptidase	5.59116	-0.198813	0.0356653	-0.0729674	-0.089276	-0.0819863	-0.201739	0.351467	0.937271	0.91977	0.99968	0.665553	0.537339
NZ_CP011454.1	3024056	3026278	-	CDS	GEMMAAP_RS12815	WP_053334047.1	glycoside hydrolase family 3 C-terminal domain-containing protein	5.47914	0.143601	0.30274	-0.0725694	0.0622529	0.661375	0.151962	0.55063	0.157546	0.90846	0.99968	0.000187112	0.638756
NZ_CP011454.1	2181471	2181815	-	CDS	GEMMAAP_RS09175	WP_026850793.1	integration host factor subunit beta	6.46534	-0.198896	-0.239073	-0.0723058	-0.0187469	-0.0615252	-0.0840841	0.356998	0.338316	0.925543	0.99968	0.774785	0.841512
NZ_CP011454.1	3903642	3904682	+	CDS	GEMMAAP_RS16495	WP_053333611.1	class 1 fructose-bisphosphatase	4.84772	-0.285874	-0.186917	-0.0717357	-0.037284	-0.375614	-0.1808	0.223677	0.572106	0.941014	0.99968	0.0513371	0.646991
NZ_CP011454.1	755384	757048	+	CDS	GEMMAAP_RS03270	WP_082821016.1	D-alanyl-D-alanine carboxypeptidase/D-alanyl-D-alanine-endopeptidase	8.10807	-0.151977	0.188495	-0.0715706	-0.0286622	-0.122519	-0.47944	0.505437	0.455463	0.924003	0.99968	0.540367	0.099837
NZ_CP011454.1	259033	260106	-	CDS	GEMMAAP_RS01125	WP_053333906.1	histidinol-phosphate aminotransferase family protein	6.15856	0.544394	0.275885	-0.0713397	0.0738349	0.478645	0.44311	0.0106259	0.273397	0.924003	0.99968	0.012077	0.153344
NZ_CP011454.1	720722	721549	-	CDS	GEMMAAP_RS03110	WP_026849380.1	hypothetical protein	5.85525	-0.212976	-0.227013	-0.0713075	-0.11919	0.0150612	0.0862983	0.303068	0.367801	0.924003	0.99968	0.94586	0.824139
NZ_CP011454.1	2179652	2180623	-	CDS	GEMMAAP_RS09160	WP_026850795.1	GTP 3'%2C8-cyclase MoaA	7.15105	0.344065	0.393865	-0.0712771	-0.0570071	0.295157	0.168797	0.0256558	0.0303014	0.882783	0.99968	0.0272534	0.496585
NZ_CP011454.1	3620592	3621620	-	CDS	GEMMAAP_RS15305	WP_026848501.1	LLM class flavin-dependent oxidoreductase	5.30326	-0.285885	-0.0566297	-0.0712549	0.0838255	-0.486647	0.0666532	0.19159	0.899612	0.936688	0.99968	0.00741185	0.875894
NZ_CP011454.1	3802258	3803403	-	CDS	GEMMAAP_RS20655	WP_158514895.1	hypothetical protein	5.68706	0.628217	0.373681	-0.0711084	0.092664	0.0110466	0.0692388	0.0112585	0.202389	0.948562	0.99968	0.96746	0.898632
NZ_CP011454.1	3074142	3074435	+	CDS	GEMMAAP_RS13040	WP_026849428.1	hypothetical protein	9.01131	-0.461209	-0.285186	-0.0707198	-0.0597943	-0.623815	0.0888957	0.0368676	0.243318	0.930528	0.99968	0.00255991	0.840445
NZ_CP011454.1	3276852	3277238	+	CDS	GEMMAAP_RS13875	WP_075071529.1	metalloregulator ArsR/SmtB family transcription factor	4.74911	-0.162822	-0.315671	-0.0706976	-0.113969	-0.440082	0.0859466	0.670355	0.492895	0.967604	0.99968	0.0964505	0.90015
NZ_CP011454.1	3710267	3711763	-	CDS	GEMMAAP_RS15710	WP_026848451.1	polyamine aminopropyltransferase	6.06227	-0.290628	-0.52974	-0.0705847	0.0149517	0.544962	-0.152138	0.274429	0.0934716	0.95152	0.99968	0.0174035	0.758648
NZ_CP011454.1	1804240	1804938	+	CDS	GEMMAAP_RS07515	WP_158514768.1	energy transducer TonB	6.87899	0.11623	0.979751	-0.0704173	-0.0207839	-0.453932	0.163268	0.826056	0.0440228	0.973029	0.99968	0.216294	0.841035
NZ_CP011454.1	2991274	2992644	-	CDS	GEMMAAP_RS12680	WP_053334056.1	hypothetical protein	5.80108	0.444419	0.785269	-0.070317	0.139452	0.474399	0.120067	0.077708	0.0156604	0.948562	0.99968	0.0301917	0.809282
NZ_CP011454.1	415730	418021	+	CDS	GEMMAAP_RS01860	WP_026849197.1	TonB-dependent receptor	6.12306	-0.00667584	0.0812946	-0.0700774	-0.160296	0.524182	0.184105	0.988442	0.795143	0.918749	0.99968	0.00322884	0.587905
NZ_CP011454.1	1753316	1754779	-	CDS	GEMMAAP_RS07275	WP_026850436.1	glutamate--tRNA ligase	7.26164	0.045227	-0.0696374	-0.0700337	-0.0697863	-0.299509	0.163313	0.834781	0.781055	0.895869	0.99968	0.0378342	0.550035
NZ_CP011454.1	4643956	4644885	-	CDS	GEMMAAP_RS19530	WP_026848874.1	rhomboid family intramembrane serine protease	7.93606	-0.150542	-0.0778757	-0.0699302	-0.030547	-0.307643	-0.0827204	0.393461	0.75111	0.896968	0.99968	0.0380157	0.796485
NZ_CP011454.1	3549823	3551025	+	CDS	GEMMAAP_RS15020	WP_082821372.1	8-amino-7-oxononanoate synthase	6.67842	0.0210299	-0.0609882	-0.0697324	-0.0213582	0.110533	0.191787	0.943895	0.891723	0.994205	0.99968	0.518333	0.524958
NZ_CP011454.1	2788227	2789213	+	CDS	GEMMAAP_RS11845	WP_026849607.1	efflux RND transporter periplasmic adaptor subunit	4.26624	1.10155	1.26099	-0.0696522	0.12352	0.468416	0.558217	0.000639463	0.00482446	0.953238	0.99968	0.0327708	0.114665
NZ_CP011454.1	918948	919652	-	CDS	GEMMAAP_RS19945	WP_202969185.1	c-type cytochrome	4.95133	0.692613	0.504383	-0.0696056	0.220989	-0.226919	-0.0398695	0.00691133	0.09577	0.948562	0.99968	0.288848	0.994981
NZ_CP011454.1	970476	971072	-	CDS	GEMMAAP_RS04040	WP_026850143.1	Holliday junction branch migration protein RuvA	5.93919	0.597142	0.981409	-0.0695792	-0.137908	-0.200644	0.375069	0.00891388	0.00453313	0.936875	0.99968	0.278939	0.20754
NZ_CP011454.1	4497244	4497390	+	CDS	GEMMAAP_RS20700	WP_158514931.1	hypothetical protein	1.17323	0.296633	-0.193322	-0.0695504	0.187168	-0.0798612	0.179796	0.676495	0.898952	0.985602	0.99968	0.877155	0.869444
NZ_CP011454.1	1895109	1896647	+	CDS	GEMMAAP_RS07850	WP_158514776.1	UDP-N-acetylmuramoyl-L-alanyl-D-glutamate--2%2C6-diaminopimelate ligase	6.95634	0.244367	0.232442	-0.0695239	-0.0181252	0.510476	0.0936731	0.123233	0.198292	0.890459	0.99968	0.000690232	0.745759
NZ_CP011454.1	4679028	4679549	-	CDS	GEMMAAP_RS19725	WP_158514942.1	lipocalin-like domain-containing protein	4.56751	-0.084576	-0.0210565	-0.0695211	0.203299	-0.138216	0.126067	0.829538	0.976021	0.961084	0.99968	0.624163	0.827153
NZ_CP011454.1	794336	795034	-	CDS	GEMMAAP_RS03390	WP_053334020.1	sugar transferase	8.74385	-0.141227	-0.348791	-0.0692949	-0.17366	-0.318327	-0.0701071	0.578674	0.155851	0.936875	0.99968	0.11339	0.886512
NZ_CP011454.1	4424046	4425626	-	CDS	GEMMAAP_RS18635	WP_082821491.1	amidohydrolase family protein	5.49721	0.103051	0.0156433	-0.0689351	-0.00328042	0.0667063	-0.031024	0.680602	0.974565	0.936688	0.99968	0.74803	0.957028
NZ_CP011454.1	4611017	4611706	+	CDS	GEMMAAP_RS19390	WP_026848852.1	hypothetical protein	4.5395	0.369179	0.184529	-0.068858	0.311056	0.647015	-0.0624454	0.138245	0.607501	0.948562	0.99968	0.00294275	0.916712
NZ_CP011454.1	2785555	2785719	+	CDS	GEMMAAP_RS20570	WP_158514838.1	hypothetical protein	6.38812	-0.335585	-0.533041	-0.0687998	0.288368	0.483628	0.879898	0.389208	0.244536	0.973029	0.99968	0.117417	0.0650392
NZ_CP011454.1	273920	274492	+	CDS	GEMMAAP_RS01210	WP_026849104.1	hypothetical protein	7.76995	1.62281	0.3969	-0.0687011	-0.455926	0.984353	-0.148882	0.00114662	0.460621	0.973029	0.99968	0.0125505	0.869144
NZ_CP011454.1	4121835	4125017	+	CDS	GEMMAAP_RS17380	WP_053333558.1	efflux RND transporter permease subunit	5.88666	-0.0803099	-0.135306	-0.068645	-0.0254893	-0.190628	0.0423264	0.720871	0.607167	0.918749	0.99968	0.236945	0.922278
NZ_CP011454.1	86221	88458	-	CDS	GEMMAAP_RS00365	WP_026848984.1	prolyl oligopeptidase family serine peptidase	5.20367	0.148211	0.160233	-0.0684911	0.17445	0.623988	0.197715	0.492511	0.561943	0.928587	0.99968	0.000722361	0.550035
NZ_CP011454.1	1586075	1586899	-	CDS	GEMMAAP_RS06585	WP_026850327.1	photosynthetic reaction center subunit L	8.21859	-0.124942	-0.401633	-0.06849	0.0479273	0.494855	-0.241622	0.660494	0.133597	0.948562	0.99968	0.0220937	0.554218
NZ_CP011454.1	4062460	4066509	-	CDS	GEMMAAP_RS17135	WP_026848235.1	hypothetical protein	7.12345	0.190197	0.349562	-0.0684889	-0.0194468	0.0502097	0.203979	0.212845	0.0483443	0.886609	0.99968	0.742636	0.374705
NZ_CP011454.1	478211	480664	-	CDS	GEMMAAP_RS02085	WP_053333958.1	serine/threonine-protein kinase	5.73882	0.222134	0.441156	-0.0680974	-0.0719555	-0.048133	-0.0130651	0.223193	0.044706	0.914088	0.99968	0.88296	0.994981
NZ_CP011454.1	2632174	2633202	-	CDS	GEMMAAP_RS11225	WP_026849699.1	LacI family transcriptional regulator	3.70344	-0.458139	-0.369537	-0.0680139	-0.325342	0.0617453	0.186169	0.11082	0.340477	0.986205	0.99968	0.8303	0.698576
NZ_CP011454.1	1905277	1906533	+	CDS	GEMMAAP_RS07890	WP_026850525.1	cell division protein FtsA	8.45363	-0.164883	-0.276004	-0.0677933	-0.136847	-0.10528	0.122478	0.377123	0.156697	0.911501	0.99968	0.532716	0.701479
NZ_CP011454.1	3644773	3645942	-	CDS	GEMMAAP_RS15400	WP_053333663.1	HRDC domain-containing protein	7.67834	0.0210963	-0.073863	-0.0675754	-0.0265002	0.0183689	0.0959602	0.933976	0.980059	0.902213	0.99968	0.91936	0.752323
NZ_CP011454.1	147914	149185	-	CDS	GEMMAAP_RS00655	WP_043580086.1	ATP-binding protein	6.95959	-0.166894	0.13524	-0.0675502	0.055562	-0.44295	0.167567	0.629875	0.770164	0.963219	0.99968	0.0773275	0.749173
NZ_CP011454.1	3497054	3498694	-	CDS	GEMMAAP_RS14780	WP_026848577.1	hypothetical protein	3.87185	0.0634839	-0.167169	-0.0672891	-0.134438	-0.157547	-0.02618	0.887352	0.756141	0.965288	0.99968	0.568202	0.980408
NZ_CP011454.1	3093036	3095189	-	CDS	GEMMAAP_RS13115	WP_026848829.1	TonB-dependent receptor	6.09251	0.0778996	0.0420204	-0.0671089	0.140274	-0.283098	-0.341528	0.653021	0.953916	0.876114	0.99968	0.0200976	0.0656459
NZ_CP011454.1	3705784	3706215	-	CDS	GEMMAAP_RS15690	WP_026848452.1	BrxA/BrxB family bacilliredoxin	7.54569	0.0741429	-0.0939161	-0.0670485	-0.0864157	0.809238	0.0406748	0.915082	0.919334	0.97401	0.99968	0.0483549	0.980408
NZ_CP011454.1	4039270	4040259	-	CDS	GEMMAAP_RS17025	WP_026848249.1	SDR family oxidoreductase	5.1105	-0.355612	-0.344758	-0.067031	0.171162	-0.553195	0.0777977	0.169945	0.294784	0.953238	0.99968	0.0139403	0.886512
NZ_CP011454.1	998437	999630	-	CDS	GEMMAAP_RS04160	WP_026850120.1	glycine C-acetyltransferase	6.30421	0.261411	0.278796	-0.0670057	0.0636511	0.0830556	-0.0111289	0.155935	0.192749	0.918749	0.99968	0.638024	0.988788
NZ_CP011454.1	4700459	4701856	-	CDS	GEMMAAP_RS19815	WP_026848918.1	MBL fold metallo-hydrolase	7.60625	0.239116	0.418755	-0.0669969	0.263174	-0.279014	0.265283	0.186888	0.044706	0.914088	0.99968	0.0762648	0.329506
NZ_CP011454.1	4256776	4258422	+	CDS	GEMMAAP_RS17950	WP_082821461.1	FG-GAP-like repeat-containing protein	5.3222	0.430087	0.397365	-0.0667778	0.176185	0.399177	0.0882068	0.0255478	0.0897321	0.921162	0.99968	0.0126794	0.803079
NZ_CP011454.1	3069637	3070308	+	CDS	GEMMAAP_RS13010	WP_026849433.1	response regulator transcription factor	7.70756	0.0296903	-0.21479	-0.0666166	0.0836354	0.234995	0.124989	0.933341	0.435408	0.94232	0.99968	0.243886	0.76252
NZ_CP011454.1	4183926	4184756	-	CDS	GEMMAAP_RS17645	WP_053333548.1	creatininase family protein	4.95769	-0.545003	-0.771729	-0.0660923	0.0401409	-0.00936901	-0.157997	0.0629602	0.0473359	0.963219	0.99968	0.974964	0.757526
NZ_CP011454.1	62183	64156	+	CDS	GEMMAAP_RS00275	WP_026848970.1	ATP-binding cassette domain-containing protein	8.19998	0.2053	0.719148	-0.0660769	0.00455048	0.48113	0.540123	0.852022	0.478302	0.994205	0.99968	0.525067	0.707115
NZ_CP011454.1	1997794	1998345	+	CDS	GEMMAAP_RS08280	WP_026850588.1	bifunctional pyr operon transcriptional regulator/uracil phosphoribosyltransferase PyrR	5.62005	-0.070026	-0.14995	-0.0658824	-0.0543017	-0.755923	0.0719875	0.754848	0.550154	0.957363	0.99968	4.54144e-05	0.835671
NZ_CP011454.1	2733970	2735880	-	CDS	GEMMAAP_RS11650	WP_026849639.1	ATP-binding cassette domain-containing protein	5.92698	0.196563	0.260445	-0.0658465	-0.15674	0.285375	0.174298	0.247598	0.192749	0.90846	0.99968	0.045902	0.524958
NZ_CP011454.1	990115	991506	-	CDS	GEMMAAP_RS04125	WP_026850127.1	sigma-54 dependent transcriptional regulator	7.63511	-0.421695	-0.426881	-0.0657348	-0.30464	0.471877	0.0838867	0.233959	0.296502	0.971554	0.99968	0.125599	0.916712
NZ_CP011454.1	1645458	1646318	+	CDS	GEMMAAP_RS06825	WP_026850365.1	RNA polymerase sigma factor RpoD/SigA	7.28462	-0.175514	-0.186477	-0.0654997	-0.0336956	-0.305977	-0.196724	0.356862	0.391405	0.919548	0.99968	0.0573904	0.51792
NZ_CP011454.1	2606246	2607004	-	CDS	GEMMAAP_RS11120	WP_053334141.1	arylesterase	6.24842	-0.692279	-0.410833	-0.0651761	-0.209338	-0.219466	-0.192802	0.00662531	0.153746	0.953012	0.99968	0.316406	0.659705
NZ_CP011454.1	1644577	1645290	+	CDS	GEMMAAP_RS06820	WP_082821549.1	signal peptidase I	6.13085	0.0369533	0.0493657	-0.065112	-0.0273375	0.0967807	0.106005	0.891241	0.891723	0.973029	0.99968	0.576654	0.756714
NZ_CP011454.1	2169534	2170277	-	CDS	GEMMAAP_RS09105	WP_075071469.1	NADH-quinone oxidoreductase subunit C	7.06685	0.404848	0.442725	-0.0649581	-0.0579004	0.0122215	0.0904908	0.0106259	0.0182736	0.898641	0.99968	0.942633	0.749514
NZ_CP011454.1	1833993	1836533	+	CDS	GEMMAAP_RS07610	WP_026850483.1	bifunctional aspartate kinase/homoserine dehydrogenase I	7.00943	0.364728	0.377926	-0.0648423	0.0980936	-0.127405	0.242325	0.123213	0.158304	0.948562	0.99968	0.560828	0.526485
NZ_CP011454.1	1667826	1668860	-	CDS	GEMMAAP_RS06930	WP_145979035.1	hypothetical protein	6.57043	0.0343691	0.28973	-0.0648009	-0.0545684	0.742607	-0.104744	0.882622	0.125402	0.90884	0.99968	2.39735e-05	0.73027
NZ_CP011454.1	1736215	1737228	-	CDS	GEMMAAP_RS07205	WP_026850425.1	flippase-like domain-containing protein	5.69281	0.469414	0.393931	-0.0647933	-0.0024986	0.0559748	-0.00680343	0.0379928	0.142482	0.948562	0.99968	0.807636	0.994981
NZ_CP011454.1	318250	319347	-	CDS	GEMMAAP_RS01415	WP_026849135.1	alanine--glyoxylate aminotransferase family protein	6.07188	0.187477	0.204919	-0.0647839	-0.0497725	0.301577	0.0504777	0.232308	0.343678	0.952969	0.99968	0.0253537	0.996981
NZ_CP011454.1	3163577	3164947	-	CDS	GEMMAAP_RS13360	WP_026848792.1	amino acid permease	5.75757	0.0665409	-0.0398757	-0.0643362	0.162353	-0.208637	-0.18795	0.749229	0.911672	0.918749	0.99968	0.155047	0.491842
NZ_CP011454.1	1560584	1562017	-	CDS	GEMMAAP_RS06480	WP_026850314.1	transcriptional regulator PpsR	7.45046	0.244209	0.18798	-0.0643284	0.253456	0.223247	-0.199956	0.301417	0.516343	0.947979	0.99968	0.281078	0.625908
NZ_CP011454.1	2235039	2235845	-	CDS	GEMMAAP_RS09445	WP_075071472.1	indole-3-glycerol phosphate synthase TrpC	4.93385	0.247087	-0.00911609	-0.0642326	0.129296	-0.121262	-0.0483698	0.256963	0.987418	0.94508	0.99968	0.540367	0.998029
NZ_CP011454.1	3988412	3989170	-	CDS	GEMMAAP_RS16845	WP_026848275.1	SDR family oxidoreductase	4.37556	0.443183	0.354162	-0.0640655	0.0248866	0.69478	0.016521	0.167311	0.406426	0.967604	0.99968	0.00929967	0.991543
NZ_CP011454.1	710073	710621	+	CDS	GEMMAAP_RS03060	WP_026849372.1	hypothetical protein	9.40804	0.237809	0.299559	-0.0640192	-0.210344	-0.0498156	0.112861	0.430279	0.355896	0.960156	0.99968	0.86957	0.841786
NZ_CP011454.1	1204323	1204967	+	CDS	GEMMAAP_RS04965	WP_026849997.1	PEP-CTERM sorting domain-containing protein	5.89853	-0.15959	-0.0249117	-0.0639595	-0.068742	-0.0156318	-0.0923838	0.467558	0.957767	0.939137	0.99968	0.946535	0.82055
NZ_CP011454.1	1393392	1394801	+	CDS	GEMMAAP_RS05790	WP_082821098.1	NAD(P)/FAD-dependent oxidoreductase	7.7885	-0.280322	-0.0102875	-0.0639031	-0.187366	-0.371173	-0.40943	0.411473	0.990126	0.969794	0.99968	0.199656	0.419423
NZ_CP011454.1	2386811	2387089	-	CDS	GEMMAAP_RS10145	WP_026850657.1	DUF4321 domain-containing protein	6.99114	0.00420132	-0.138125	-0.063897	0.0298998	0.0375337	-0.315482	0.995245	0.630504	0.94232	0.99968	0.867482	0.331349
NZ_CP011454.1	1235663	1236481	+	CDS	GEMMAAP_RS05115	WP_053334242.1	hypothetical protein	6.50944	0.0779227	-0.290537	-0.0636836	-0.0266514	-0.27494	0.0832829	0.706657	0.150407	0.918749	0.99968	0.0711959	0.803079
NZ_CP011454.1	1732046	1734283	+	CDS	GEMMAAP_RS07190	WP_026850423.1	carbohydrate binding family 9 domain-containing protein	5.68158	0.260404	0.352648	-0.0636788	-0.199233	-0.26134	0.424348	0.652092	0.620775	0.983641	0.99968	0.541752	0.585605
NZ_CP011454.1	606271	607542	+	CDS	GEMMAAP_RS02690	WP_158514698.1	hypothetical protein	5.74121	0.0875794	0.180666	-0.0636354	-0.223703	0.156659	0.250425	0.815439	0.681213	0.929612	0.99968	0.354213	0.385086
NZ_CP011454.1	3267166	3267534	+	CDS	GEMMAAP_RS13830	WP_026848717.1	DUF423 domain-containing protein	5.25955	-0.0249943	-0.186391	-0.0634452	0.0171357	0.00323135	-0.0288058	0.928856	0.530038	0.978517	0.99968	0.985858	0.980408
NZ_CP011454.1	339772	340710	+	CDS	GEMMAAP_RS01500	WP_145978938.1	nuclease	5.15518	0.0663725	-0.279681	-0.0631903	0.0507386	-0.189192	-0.236711	0.795854	0.35986	0.942304	0.99968	0.279917	0.4622
NZ_CP011454.1	2065714	2066475	-	CDS	GEMMAAP_RS08600	WP_082821187.1	UDP-2%2C3-diacylglucosamine diphosphatase	6.19708	-0.239365	-0.267503	-0.0631539	-0.185384	-0.637046	0.100438	0.296523	0.334264	0.948562	0.99968	0.00182095	0.810549
NZ_CP011454.1	2951329	2952042	+	CDS	GEMMAAP_RS12530	WP_026849505.1	hypothetical protein	6.55357	0.165232	-0.105857	-0.0631221	-0.0284909	-0.0233647	-0.301872	0.450727	0.73654	0.94232	0.99968	0.916741	0.333497
NZ_CP011454.1	2909219	2910304	+	CDS	GEMMAAP_RS12330	WP_026849537.1	glycosyltransferase family 9 protein	5.48515	0.28123	0.286048	-0.0631197	-0.111582	0.385298	0.0544294	0.121649	0.194028	0.924003	0.99968	0.0120775	0.886355
NZ_CP011454.1	4592239	4593606	-	CDS	GEMMAAP_RS19325	WP_026851035.1	type VI secretion system baseplate subunit TssK	6.26111	-0.00187211	-0.167803	-0.0630313	0.153193	-0.0979032	0.0708988	0.996133	0.370278	0.902213	0.99968	0.458925	0.792164
NZ_CP011454.1	1729000	1729989	-	CDS	GEMMAAP_RS07180	WP_026850421.1	threonine/serine dehydratase	5.15655	-0.00118999	0.14553	-0.0629491	-0.153371	-0.0600332	-0.00605228	0.998525	0.597707	0.936688	0.99968	0.753675	0.994981
NZ_CP011454.1	4602695	4603183	+	CDS	GEMMAAP_RS19365	WP_043580046.1	type VI secretion system baseplate subunit TssE	4.81104	0.290046	0.216732	-0.0626985	0.175128	0.654978	0.132379	0.177079	0.449632	0.948562	0.99968	0.000723555	0.726411
NZ_CP011454.1	268843	269280	-	CDS	GEMMAAP_RS01180	WP_158514683.1	hypothetical protein	4.75858	-0.0679567	0.0277887	-0.0623741	-0.11756	0.00734265	0.361702	0.83312	0.961776	0.953012	0.99968	0.977186	0.296215
NZ_CP011454.1	4480521	4482764	-	CDS	GEMMAAP_RS18870	WP_053334602.1	EAL domain-containing protein	5.38457	0.57485	0.38746	-0.0623127	0.254632	0.173438	-0.013677	0.0325162	0.235859	0.959864	0.99968	0.47897	0.992208
NZ_CP011454.1	1299760	1300785	+	CDS	GEMMAAP_RS05455	WP_026849915.1	dipeptide epimerase	6.11361	0.172097	0.69225	-0.0621174	0.00313071	0.375966	-0.0191806	0.653707	0.0765643	0.971825	0.99968	0.221642	0.990898
NZ_CP011454.1	2534426	2536849	-	CDS	GEMMAAP_RS10790	WP_202969114.1	aldehyde dehydrogenase family protein	8.193	0.202919	0.309045	-0.0620546	-0.102973	0.0262262	0.0994118	0.15946	0.0551446	0.890291	0.99968	0.864065	0.698576
NZ_CP011454.1	3717289	3718743	-	CDS	GEMMAAP_RS15745	WP_202969152.1	aminopeptidase P family protein	6.99063	0.245576	0.315775	-0.0618966	0.176291	0.189176	-0.192001	0.20168	0.140962	0.935607	0.99968	0.26553	0.550035
NZ_CP011454.1	1241104	1241958	+	CDS	GEMMAAP_RS20810	WP_026849974.1	PEP-CTERM sorting domain-containing protein	8.56074	-0.1931	-0.350316	-0.0616569	-0.00802255	-0.398591	-0.277222	0.375914	0.125402	0.941014	0.99968	0.0314234	0.38778
NZ_CP011454.1	2162396	2162902	-	CDS	GEMMAAP_RS09070	WP_026850806.1	NADH-quinone oxidoreductase subunit J	5.61007	0.248767	0.154831	-0.0610867	0.106434	0.461796	-0.0593146	0.20168	0.563926	0.936875	0.99968	0.00651197	0.888449
NZ_CP011454.1	730258	730587	+	CDS	GEMMAAP_RS03165	WP_145978972.1	hypothetical protein	9.01017	0.0496565	-0.329554	-0.0609943	-0.0161525	0.208393	-0.0563417	0.88358	0.212902	0.95152	0.99968	0.339076	0.9219
NZ_CP011454.1	2489214	2489600	-	CDS	GEMMAAP_RS19995	WP_053334166.1	sterol desaturase family protein	2.68697	-0.379439	-0.864449	-0.0609542	-0.175805	-0.549721	0.0265648	0.338654	0.122925	0.998787	0.99968	0.0599039	0.998662
NZ_CP011454.1	3408258	3408773	+	CDS	GEMMAAP_RS14445	WP_026848625.1	hypothetical protein	5.00551	0.217825	0.0795706	-0.0608522	0.0976804	-0.234952	0.205352	0.356745	0.910232	0.988163	0.99968	0.189633	0.542237
NZ_CP011454.1	4333880	4334671	-	CDS	GEMMAAP_RS18270	WP_026850882.1	SDR family oxidoreductase	7.74294	-0.125395	-0.220914	-0.0608208	0.0607532	-0.105201	0.0545627	0.492548	0.251912	0.918749	0.99968	0.508649	0.877701
NZ_CP011454.1	3692172	3693461	+	CDS	GEMMAAP_RS15620	WP_082821393.1	ABC transporter permease	6.91283	-0.0871791	-0.205489	-0.0606613	-0.0678412	-0.0367499	-0.0915909	0.625557	0.251446	0.90846	0.99968	0.820928	0.745508
NZ_CP011454.1	889045	890115	+	CDS	GEMMAAP_RS03740	WP_043581099.1	dTDP-glucose 4%2C6-dehydratase	4.15405	0.13457	-0.00979728	-0.060418	0.0141046	-0.110002	0.374335	0.656074	0.990126	0.960156	0.99968	0.614149	0.270917
NZ_CP011454.1	4186188	4186595	-	CDS	GEMMAAP_RS17655	WP_026848162.1	VOC family protein	3.33212	0.358696	0.012234	-0.0603748	0.118337	-0.370876	0.152279	0.377448	0.991762	0.973029	0.99968	0.206028	0.811402
NZ_CP011454.1	2716797	2717552	+	CDS	GEMMAAP_RS11575	WP_053334115.1	transglycosylase SLT domain-containing protein	8.88425	-0.0324651	0.0563964	-0.0603332	-0.09893	0.624706	-0.0470105	0.914829	0.871511	0.938926	0.99968	0.00110186	0.922278
NZ_CP011454.1	2963619	2964608	-	CDS	GEMMAAP_RS12575	WP_026849498.1	electron transfer flavoprotein subunit alpha/FixB family protein	6.89653	-0.201889	-0.138909	-0.0602616	0.0600894	-0.344526	-0.0537837	0.325131	0.899612	0.985602	0.99968	0.046065	0.907098
NZ_CP011454.1	2216273	2217028	-	CDS	GEMMAAP_RS09355	WP_053334519.1	class I SAM-dependent methyltransferase	6.12033	-0.103081	-0.203692	-0.0599105	-0.0761084	-0.829889	0.250201	0.735904	0.567098	0.960416	0.99968	0.000452498	0.528113
NZ_CP011454.1	1811347	1814646	-	CDS	GEMMAAP_RS07540	WP_053334388.1	exo-alpha-sialidase	6.35792	0.291809	0.164441	-0.0593611	0.110401	0.0107871	0.136255	0.064095	0.401978	0.914973	0.99968	0.950367	0.612289
NZ_CP011454.1	1307346	1307573	+	CDS	GEMMAAP_RS05480	WP_026849911.1	hypothetical protein	3.4687	0.295529	0.170474	-0.059203	-0.125403	-0.203843	0.077277	0.549451	0.845921	0.979478	0.99968	0.577296	0.936063
NZ_CP011454.1	3712187	3713506	-	CDS	GEMMAAP_RS15720	WP_026848448.1	DUF4178 domain-containing protein	6.26895	-0.0117495	-0.0887492	-0.0590288	-0.0768922	0.987997	0.170599	0.977932	0.807066	0.95065	0.99968	2.55457e-05	0.67105
NZ_CP011454.1	806293	807972	-	CDS	GEMMAAP_RS03440	WP_026850228.1	amidohydrolase	4.85656	0.252825	-0.168552	-0.0588857	0.169008	-0.317493	-0.0136376	0.263057	0.897927	0.953012	0.99968	0.0820777	0.98831
NZ_CP011454.1	4152803	4154113	+	CDS	GEMMAAP_RS17490	WP_053333553.1	VanZ family protein	5.1339	0.209067	0.11067	-0.0588384	0.0894839	-0.264926	0.0199747	0.289303	0.7133	0.94232	0.99968	0.113743	0.977423
NZ_CP011454.1	2594531	2594878	+	CDS	GEMMAAP_RS11025	WP_158514824.1	hypothetical protein	4.36746	0.377522	0.259281	-0.0588247	0.00717121	-0.0453559	-0.134741	0.246304	0.574089	0.973029	0.99968	0.889991	0.829172
NZ_CP011454.1	3983324	3983719	-	CDS	GEMMAAP_RS16815	WP_026848281.1	RidA family protein	3.38112	0.0943842	-0.365371	-0.0585915	0.0698638	0.77905	0.150439	0.824769	0.443692	0.973029	0.99968	0.00581331	0.886512
NZ_CP011454.1	192313	192537	+	CDS	GEMMAAP_RS00850	WP_026849045.1	amphi-Trp domain-containing protein	5.28425	-0.0721151	-0.0734621	-0.0584772	-0.120155	-0.285097	0.193686	0.855658	0.902562	0.969794	0.99968	0.256682	0.701479
NZ_CP011454.1	1847262	1849472	+	CDS	GEMMAAP_RS07645	WP_082821156.1	S9 family peptidase	5.95742	0.287808	0.267437	-0.0583281	0.199052	0.451199	0.011388	0.0583558	0.133597	0.913101	0.99968	0.00128274	0.986152
NZ_CP011454.1	3858460	3858879	-	CDS	GEMMAAP_RS16325	WP_026848353.1	NUDIX hydrolase	3.46091	0.131895	-0.0189135	-0.0580199	0.0674757	-0.0163846	0.120877	0.800689	0.987047	0.978041	0.99968	0.969346	0.884019
NZ_CP011454.1	3851965	3852564	-	CDS	GEMMAAP_RS16295	WP_075071551.1	DUF1697 domain-containing protein	4.13998	-0.305384	-0.27243	-0.0579492	-0.169162	-0.469879	-0.219779	0.240861	0.440113	0.963219	0.99968	0.0263746	0.597575
NZ_CP011454.1	127819	128031	+	CDS	GEMMAAP_RS00540	WP_202969172.1	DUF433 domain-containing protein	4.83696	-0.425637	0.00879219	-0.0578693	-0.0776333	-0.274495	0.230413	0.0953032	0.990126	0.960416	0.99968	0.180187	0.550035
NZ_CP011454.1	3895434	3896348	+	CDS	GEMMAAP_RS16465	WP_053333612.1	NAD(P)-dependent oxidoreductase	4.63431	0.888423	0.854173	-0.0578443	0.156407	0.324738	0.198036	0.00237738	0.0175378	0.963219	0.99968	0.150262	0.67105
NZ_CP011454.1	1103392	1104585	-	CDS	GEMMAAP_RS04590	WP_158514733.1	hypothetical protein	7.39041	0.253322	0.325443	-0.0578046	-0.0134419	0.572261	0.0923706	0.164315	0.109836	0.935607	0.99968	0.000913901	0.787607
NZ_CP011454.1	2825437	2826303	-	CDS	GEMMAAP_RS11995	WP_202969123.1	NAD-dependent deacylase	6.15755	0.365251	0.340007	-0.0576203	0.170749	-0.478916	0.290574	0.108372	0.207462	0.953238	0.99968	0.0139399	0.382535
NZ_CP011454.1	2743210	2743749	-	CDS	GEMMAAP_RS11680	WP_145979108.1	hypothetical protein	4.49246	-0.00859807	-0.226592	-0.0573763	-0.0658543	-0.16812	-0.113462	0.990367	0.598398	0.971554	0.99968	0.523024	0.84265
NZ_CP011454.1	3695007	3696287	-	CDS	GEMMAAP_RS15630	WP_075071546.1	pilus assembly protein TadG-related protein	7.90842	0.321385	0.097044	-0.0573702	-0.00499256	0.22764	-0.0122629	0.0571459	0.673289	0.924003	0.99968	0.126232	0.986703
NZ_CP011454.1	1700600	1702162	+	CDS	GEMMAAP_RS07060	WP_158514763.1	family 10 glycosylhydrolase	6.575	0.0665462	0.524081	-0.057306	0.0245118	-0.379127	0.129109	0.842887	0.0801575	0.961902	0.99968	0.0837249	0.779784
NZ_CP011454.1	4506342	4509575	-	CDS	GEMMAAP_RS18990	WP_053334609.1	hypothetical protein	5.07727	0.00828684	0.138585	-0.0571228	0.101032	0.278089	0.265126	0.989288	0.735837	0.963219	0.99968	0.198089	0.51792
NZ_CP011454.1	262691	263191	+	CDS	GEMMAAP_RS01140	WP_026849090.1	cupredoxin domain-containing protein	10.3833	-0.303955	-0.313228	-0.0568732	-0.215377	0.298	0.21837	0.289303	0.316049	0.965288	0.99968	0.236945	0.659863
NZ_CP011454.1	2555091	2556482	-	CDS	GEMMAAP_RS10875	WP_026849747.1	hypothetical protein	8.58412	0.320614	0.168395	-0.0568382	-0.0656373	-0.0973638	-0.266841	0.179555	0.572106	0.954222	0.99968	0.678949	0.491008
NZ_CP011454.1	1484168	1486087	-	CDS	GEMMAAP_RS19960	WP_053334319.1	peptidylprolyl isomerase	5.08787	-0.00986104	-0.144555	-0.0567722	0.0101281	-0.314518	-0.0291708	0.979529	0.61377	0.94757	0.99968	0.0605427	0.955293
NZ_CP011454.1	637938	639800	-	CDS	GEMMAAP_RS02810	WP_053333988.1	cyclomaltodextrinase N-terminal domain-containing protein	3.41311	-0.24032	-0.0231188	-0.0567038	-0.217807	0.277663	-0.0750191	0.450727	0.980691	0.973029	0.99968	0.24972	0.910232
NZ_CP011454.1	1311078	1311803	+	CDS	GEMMAAP_RS05505	WP_026849908.1	sulfite exporter TauE/SafE family protein	5.83671	0.406138	0.164661	-0.0563042	0.0649786	0.471268	0.201972	0.0591436	0.577357	0.95152	0.99968	0.0119795	0.583332
NZ_CP011454.1	342198	344450	-	CDS	GEMMAAP_RS01510	WP_053333924.1	response regulator	7.32016	0.549251	0.372619	-0.0562666	0.181134	0.0360017	0.239904	0.00585703	0.0889274	0.9428	0.99968	0.86026	0.416782
NZ_CP011454.1	2214169	2215785	-	CDS	GEMMAAP_RS09345	WP_082821203.1	acyl-CoA carboxylase subunit beta	7.66025	0.129918	0.121355	-0.0562569	0.12504	0.0342823	0.149693	0.43366	0.538527	0.918749	0.99968	0.838042	0.576048
NZ_CP011454.1	2831914	2833068	+	CDS	GEMMAAP_RS12015	WP_053334091.1	phosphate ABC transporter substrate-binding protein PstS	4.91336	-0.295642	-0.0991899	-0.0560085	-0.0660497	-0.125966	0.00591649	0.274429	0.833649	0.967604	0.99968	0.599889	0.996345
NZ_CP011454.1	1991626	1993797	+	CDS	GEMMAAP_RS08255	WP_082821175.1	penicillin acylase family protein	5.93664	0.205748	0.188021	-0.055998	0.133979	0.234205	0.107467	0.259715	0.403682	0.939137	0.99968	0.127895	0.757526
NZ_CP011454.1	3532464	3533369	+	CDS	GEMMAAP_RS14920	WP_053333686.1	sulfurtransferase	5.77368	-0.112389	0.109528	-0.0558113	-0.0942055	-0.188668	0.0653966	0.634215	0.728268	0.948562	0.99968	0.281826	0.875361
NZ_CP011454.1	1462936	1463733	+	CDS	GEMMAAP_RS06045	WP_026850245.1	2-(1%2C2-epoxy-1%2C2-dihydrophenyl)acetyl-CoA isomerase PaaG	6.43414	0.0263965	0.113876	-0.0557688	0.191512	-0.315604	0.220945	0.974913	0.697203	0.927693	0.99968	0.0235325	0.35205
NZ_CP011454.1	3019879	3020673	+	CDS	GEMMAAP_RS12800	WP_026849464.1	glycoside hydrolase family 16 protein	3.18095	-0.176911	0.0308648	-0.0556464	-0.269648	0.131885	-0.30513	0.589808	0.96378	0.971554	0.99968	0.60014	0.51792
NZ_CP011454.1	2131349	2131924	-	CDS	GEMMAAP_RS08915	WP_082821194.1	LPS export ABC transporter periplasmic protein LptC	6.31606	-0.736972	-0.675103	-0.055524	-0.240469	0.24275	-0.261467	0.00157384	0.0156604	0.953238	0.99968	0.207828	0.46572
NZ_CP011454.1	1891660	1892610	+	CDS	GEMMAAP_RS07835	WP_202969205.1	16S rRNA (cytosine(1402)-N(4))-methyltransferase RsmH	6.69598	-0.0153999	-0.144894	-0.0554607	0.0947094	-0.128177	0.0748639	0.953766	0.505756	0.935317	0.99968	0.398069	0.81351
NZ_CP011454.1	1959146	1959664	+	CDS	GEMMAAP_RS08115	WP_043581381.1	bifunctional nuclease family protein	5.60111	0.60912	0.613533	-0.055376	0.0999258	0.0211741	0.0106815	0.00967927	0.0313385	0.959121	0.99968	0.934491	0.993222
NZ_CP011454.1	2149330	2149512	-	CDS	GEMMAAP_RS09015	WP_026850814.1	50S ribosomal protein L32	7.97711	-0.194412	-0.303521	-0.0553105	-0.173988	0.689311	-0.0412035	0.418015	0.234147	0.953238	0.99968	0.00141221	0.946908
NZ_CP011454.1	1587294	1587419	-	CDS	GEMMAAP_RS06595	WP_158514756.1	hypothetical protein	9.48432	-0.0454722	-0.199039	-0.0552609	-0.210427	0.655419	-0.102963	0.913611	0.561088	0.966912	0.99968	0.00874726	0.855517
NZ_CP011454.1	1596471	1598348	+	CDS	GEMMAAP_RS06640	WP_026850336.1	magnesium chelatase subunit D	7.13957	0.226285	0.355125	-0.055192	0.0887443	0.619311	0.307306	0.243246	0.101463	0.945052	0.99968	0.000702676	0.277866
NZ_CP011454.1	3576315	3577442	+	CDS	GEMMAAP_RS15135	WP_026848525.1	PAS domain-containing hybrid sensor histidine kinase/response regulator	6.27852	0.746976	0.208067	-0.0551893	-0.00854832	0.473484	0.39409	0.00403025	0.528448	0.962851	0.99968	0.0277838	0.281296
NZ_CP011454.1	1465390	1466640	+	CDS	GEMMAAP_RS06060	WP_026850248.1	3-oxoadipyl-CoA thiolase	6.52751	0.178236	0.390929	-0.0550325	0.156248	0.324251	0.127029	0.351947	0.0686676	0.94232	0.99968	0.0420687	0.699162
NZ_CP011454.1	1023057	1023476	+	CDS	GEMMAAP_RS04260	WP_026850106.1	hypothetical protein	6.17372	-0.362569	-0.533561	-0.0548644	-0.248161	-0.772703	-0.33545	0.19918	0.119146	0.971554	0.99968	0.00228811	0.432038
NZ_CP011454.1	1668872	1672444	-	CDS	GEMMAAP_RS06935	WP_026850381.1	chromosome segregation protein SMC	8.53771	0.0838852	0.194749	-0.0546829	0.00531197	0.557284	-0.0260119	0.724085	0.392486	0.94757	0.99968	0.00253463	0.964545
NZ_CP011454.1	587852	588520	+	CDS	GEMMAAP_RS02605	WP_053333977.1	DNA-3-methyladenine glycosylase	5.81175	-0.12429	0.0047536	-0.0546562	-0.0706091	-0.0176147	-0.011622	0.594286	0.992838	0.951475	0.99968	0.9389	0.990898
NZ_CP011454.1	4360732	4361904	-	CDS	GEMMAAP_RS18375	WP_026850895.1	twin-arginine translocation signal domain-containing protein	6.98538	-0.347997	-0.524219	-0.0541369	-0.222513	0.130488	-0.309737	0.110694	0.0427292	0.953238	0.99968	0.524285	0.350496
NZ_CP011454.1	4667658	4668326	-	CDS	GEMMAAP_RS19665	WP_026848896.1	hypothetical protein	4.10421	-0.124048	0.113362	-0.0541332	-0.0558755	-0.327056	0.163436	0.722362	0.998154	0.971825	0.99968	0.159271	0.728622
NZ_CP011454.1	1052436	1053488	-	CDS	GEMMAAP_RS04385	WP_053334266.1	cyanophycinase	5.58746	0.059945	0.235552	-0.0541081	0.0227714	-0.152928	-0.103012	0.773371	0.247791	0.935682	0.99968	0.282654	0.724304
NZ_CP011454.1	2458275	2458520	-	CDS	GEMMAAP_RS10470	WP_026849807.1	hypothetical protein	5.36653	0.0725585	0.0271144	-0.0540124	0.00109981	0.183715	-0.282284	0.846782	0.966699	0.973029	0.99968	0.473104	0.551163
NZ_CP011454.1	4269764	4270294	+	CDS	GEMMAAP_RS18000	WP_026848108.1	GNAT family N-acetyltransferase	5.2047	0.533856	0.152544	-0.0540064	0.252087	-0.118731	-0.142838	0.0544924	0.730026	0.971554	0.99968	0.639524	0.771957
NZ_CP011454.1	3624077	3626029	+	CDS	GEMMAAP_RS15320	WP_082821382.1	gamma-glutamyltransferase	5.50384	0.0193815	-0.0899235	-0.0539277	0.093502	-0.0395189	-0.0178331	0.936282	0.717596	0.929612	0.99968	0.800855	0.970904
NZ_CP011454.1	1496788	1498215	+	CDS	GEMMAAP_RS06165	WP_026850266.1	amidohydrolase family protein	6.52736	0.00708825	0.0755881	-0.0538088	0.0346972	-0.00823045	-0.403047	0.988972	0.837056	0.95471	0.99968	0.973417	0.196617
NZ_CP011454.1	1535129	1535437	+	CDS	GEMMAAP_RS06345	WP_026850293.1	YbaB/EbfC family nucleoid-associated protein	5.22955	0.213327	0.193159	-0.0536434	-0.143435	0.54161	-0.0945089	0.281586	0.448916	0.963212	0.99968	0.00275531	0.811729
NZ_CP011454.1	362465	362683	+	CDS	GEMMAAP_RS20215	WP_158514685.1	hypothetical protein	5.90509	0.0614479	0.151599	-0.0536037	-0.21588	-0.156238	-0.0456146	0.897511	0.772108	0.973029	0.99968	0.602751	0.959408
NZ_CP011454.1	1785503	1786579	+	CDS	GEMMAAP_RS07415	WP_026850457.1	Glu/Leu/Phe/Val dehydrogenase	5.97394	0.169698	0.142901	-0.0535977	0.168246	0.327089	0.0218011	0.398794	0.587919	0.948562	0.99968	0.042393	0.998662
NZ_CP011454.1	235564	238272	+	CDS	GEMMAAP_RS01025	WP_053333901.1	carbohydrate binding family 9 domain-containing protein	5.91408	0.13852	0.151858	-0.0535233	0.119147	0.102739	-0.101652	0.492252	0.551065	0.948562	0.99968	0.546929	0.76252
NZ_CP011454.1	483575	484936	+	CDS	GEMMAAP_RS02095	WP_158514693.1	sulfatase-like hydrolase/transferase	4.12982	0.117747	-0.110162	-0.0533669	0.0766771	0.150881	0.254461	0.788402	0.876481	0.973029	0.99968	0.605211	0.646991
NZ_CP011454.1	3591694	3593274	-	CDS	GEMMAAP_RS15185	WP_158514884.1	VCBS repeat-containing protein	5.13432	0.0192146	0.352556	-0.0529849	0.210519	0.00801682	0.176821	0.951778	0.139834	0.95152	0.99968	0.968959	0.565266
NZ_CP011454.1	1968433	1968888	+	CDS	GEMMAAP_RS08155	WP_026850570.1	hypothetical protein	12.1507	0.0720468	0.0115979	-0.0529624	-0.0298548	0.0714225	0.137556	0.819298	0.981727	0.961084	0.99968	0.778189	0.759771
NZ_CP011454.1	2799940	2800956	-	CDS	GEMMAAP_RS11895	WP_158514841.1	MBL fold metallo-hydrolase	5.53447	0.435105	0.339979	-0.0527312	0.260534	0.380131	0.236022	0.0415331	0.189062	0.953238	0.99968	0.0336566	0.479478
NZ_CP011454.1	4585105	4585857	-	CDS	GEMMAAP_RS19305	WP_026851033.1	hypothetical protein	6.66582	-0.594033	-0.307994	-0.0525864	-0.293036	-0.140949	-0.0563643	0.011194	0.259567	0.960898	0.99968	0.512552	0.916712
NZ_CP011454.1	3035089	3037566	-	CDS	GEMMAAP_RS12850	WP_053334046.1	type I DNA topoisomerase	8.09972	0.190522	0.086823	-0.0525229	-0.0276711	0.193538	0.0848423	0.303071	0.736436	0.94232	0.99968	0.229488	0.809282
NZ_CP011454.1	144647	145594	+	CDS	GEMMAAP_RS00635	WP_026849017.1	NmrA/HSCARG family protein	5.49087	-0.234345	0.11075	-0.0524838	0.0159701	-0.223807	0.0264498	0.400676	0.806156	0.971554	0.99968	0.302287	0.975619
NZ_CP011454.1	4709888	4710544	+	CDS	GEMMAAP_RS19850	WP_053333844.1	uracil phosphoribosyltransferase	5.51178	-0.0492033	-0.0632287	-0.052469	-0.115335	-0.357419	0.0897888	0.842407	0.860014	0.948562	0.99968	0.0206934	0.78207
NZ_CP011454.1	1344342	1345391	-	CDS	GEMMAAP_RS05620	WP_053334220.1	glycerophosphodiester phosphodiesterase	2.36432	-0.72161	-0.837896	-0.0523492	-0.372767	-0.249838	-0.105129	0.100197	0.180036	0.985391	0.99968	0.43657	0.898785
NZ_CP011454.1	1463739	1464938	+	CDS	GEMMAAP_RS06050	WP_026850246.1	3-hydroxybutyryl-CoA dehydrogenase	6.93687	-0.0137271	0.252792	-0.0522062	0.0528298	-0.149766	0.251198	0.987033	0.111609	0.914088	0.99968	0.216378	0.196718
NZ_CP011454.1	1178874	1179659	-	CDS	GEMMAAP_RS04870	WP_145979010.1	hypothetical protein	5.7144	-0.648237	-0.654909	-0.052187	-0.0143832	-0.58741	-0.513038	0.0681456	0.132375	0.978517	0.99968	0.0541698	0.339271
NZ_CP011454.1	4637006	4637377	-	CDS	GEMMAAP_RS19490	WP_043580048.1	HigA family addiction module antidote protein	4.41815	-0.129641	-0.187174	-0.0521189	0.145233	-0.0434644	-0.14162	0.661684	0.618701	0.998787	0.99968	0.86665	0.759707
NZ_CP011454.1	3400865	3403483	+	CDS	GEMMAAP_RS14420	WP_026848629.1	DPP IV N-terminal domain-containing protein	6.85968	0.321463	0.337537	-0.0521048	0.19462	0.25392	0.0416717	0.121812	0.153746	0.953238	0.99968	0.158927	0.935404
NZ_CP011454.1	3554236	3554871	+	CDS	GEMMAAP_RS15040	WP_026848542.1	pyridoxamine 5'-phosphate oxidase	5.61879	0.1709	0.373141	-0.052075	-0.0637357	0.0211129	-0.318393	0.513043	0.198373	0.965288	0.99968	0.93567	0.38405
NZ_CP011454.1	3698196	3699692	-	CDS	GEMMAAP_RS15645	WP_075071547.1	CpaF family protein	7.80529	0.241657	0.0157406	-0.0519572	-0.0841407	0.573443	-0.0403817	0.134944	0.962983	0.930528	0.99968	0.000302472	0.914751
NZ_CP011454.1	3286814	3288310	-	CDS	GEMMAAP_RS13925	WP_026848703.1	efflux RND transporter periplasmic adaptor subunit	4.53922	0.348777	0.185579	-0.0518479	-0.0707263	0.331596	0.129387	0.293182	0.726072	0.973029	0.99968	0.243886	0.845705
NZ_CP011454.1	1141358	1142323	-	CDS	GEMMAAP_RS04715	WP_145979005.1	ABC transporter permease	5.12745	0.471015	0.526452	-0.051416	0.0658778	0.390051	0.316614	0.013083	0.0261237	0.948562	0.99968	0.0135151	0.226854
NZ_CP011454.1	1556909	1558153	-	CDS	GEMMAAP_RS06465	WP_053334447.1	geranylgeranyl diphosphate reductase	7.94484	0.0841475	0.0103154	-0.0514051	-0.0968186	0.348086	0.0906847	0.660807	0.976021	0.936688	0.99968	0.0174035	0.76256
NZ_CP011454.1	3106303	3107841	-	CDS	GEMMAAP_RS13155	WP_043579520.1	amidase	5.18659	0.22888	-0.133014	-0.0512754	0.17779	-0.0444006	0.0700437	0.366155	0.868439	0.967604	0.99968	0.85653	0.888686
NZ_CP011454.1	1836536	1837888	+	CDS	GEMMAAP_RS07615	WP_026850484.1	threonine synthase	6.5087	0.0242664	0.10784	-0.0511588	0.0694972	0.225643	0.222579	0.947552	0.755035	0.960178	0.99968	0.252905	0.550035
NZ_CP011454.1	2328311	2328829	-	CDS	GEMMAAP_RS09865	WP_043581685.1	translation initiation factor IF-3	8.24231	-0.41877	-0.616043	-0.0510247	-0.204542	0.690346	0.0674407	0.0586107	0.0176763	0.958126	0.99968	0.00106394	0.889114
NZ_CP011454.1	4251360	4254659	+	CDS	GEMMAAP_RS17935	WP_158514918.1	glycosyl hydrolase	5.55739	-0.0127414	-0.239305	-0.0508925	9.11485e-05	-0.0667651	-0.109215	0.999267	0.491473	0.95471	0.999765	0.744869	0.77379
NZ_CP011454.1	3830660	3831055	+	CDS	GEMMAAP_RS16190	WP_145979187.1	hypothetical protein	5.02499	-0.177702	-0.227927	-0.0508583	-0.0443107	-0.0474902	0.0965722	0.489309	0.490251	0.967529	0.99968	0.839407	0.819371
NZ_CP011454.1	729701	730261	+	CDS	GEMMAAP_RS03160	WP_026849386.1	RNA polymerase sigma factor	9.4877	-0.0281073	-0.216489	-0.0508258	-0.0853204	0.0827819	0.129813	0.937477	0.424871	0.960898	0.99968	0.724587	0.760446
NZ_CP011454.1	4040962	4041744	+	CDS	GEMMAAP_RS17035	WP_202969229.1	1%2C4-dihydroxy-6-naphthoate synthase	5.14622	0.175311	-0.148701	-0.0508026	0.0665758	-0.413044	-0.30155	0.395985	0.602818	0.953238	0.99968	0.0140132	0.29065
NZ_CP011454.1	1553219	1554208	-	CDS	GEMMAAP_RS06450	WP_043581443.1	oxygen-dependent coproporphyrinogen oxidase	7.04506	0.379883	0.242127	-0.0505676	-0.00668913	0.864298	0.105733	0.0819962	0.342929	0.958114	0.99968	0.000112012	0.80697
NZ_CP011454.1	4685932	4687005	+	CDS	GEMMAAP_RS19755	WP_053333836.1	DUF1028 domain-containing protein	4.45966	-0.0066228	0.34692	-0.0503727	0.292282	0.100779	0.0235137	0.996874	0.364174	0.973029	0.99968	0.68149	0.980408
NZ_CP011454.1	2188501	2188956	-	CDS	GEMMAAP_RS09215	WP_026850788.1	low molecular weight protein arginine phosphatase	4.3655	0.0146909	-0.176193	-0.0501887	0.0619081	0.299596	-0.0448828	0.979731	0.712596	0.973029	0.99968	0.257157	0.959886
NZ_CP011454.1	2212793	2214169	-	CDS	GEMMAAP_RS09340	WP_043581647.1	DUF1446 domain-containing protein	7.1835	0.190968	0.187589	-0.0501619	-0.00729785	0.336589	0.257487	0.322303	0.397606	0.948601	0.99968	0.0392309	0.365184
NZ_CP011454.1	2815111	2815896	-	CDS	GEMMAAP_RS20310	WP_026849591.1	RNA methyltransferase	4.95623	-0.0752429	0.0542649	-0.0501059	-0.112033	-0.345818	0.239481	0.823109	0.923952	0.971925	0.99968	0.11517	0.572695
NZ_CP011454.1	3693481	3694902	-	CDS	GEMMAAP_RS15625	WP_026848457.1	hypothetical protein	8.07519	0.254967	0.199922	-0.0500109	0.00413052	0.62934	0.133644	0.124576	0.287212	0.938926	0.99968	0.000168542	0.647911
NZ_CP011454.1	3257754	3258185	-	CDS	GEMMAAP_RS13785	WP_026848727.1	OsmC family protein	6.64204	0.0367142	0.0748419	-0.0498908	-0.140203	0.00867337	0.00534659	0.927839	0.875255	0.971554	0.99968	0.974964	0.996873
NZ_CP011454.1	1920209	1921510	+	CDS	GEMMAAP_RS07930	WP_053334414.1	asparagine--tRNA ligase	6.08426	0.0145935	-0.278777	-0.0498895	-0.0511888	-0.415344	-0.188554	0.952346	0.142621	0.936688	0.99968	0.00287217	0.428351
NZ_CP011454.1	1995698	1996924	+	CDS	GEMMAAP_RS08270	WP_026850586.1	ATP-grasp domain-containing protein	6.13417	0.320295	0.330257	-0.0498238	0.133675	0.0743306	0.209956	0.10767	0.153746	0.954584	0.99968	0.69841	0.517237
NZ_CP011454.1	2018906	2019637	+	CDS	GEMMAAP_RS08375	WP_053334432.1	biotin--[acetyl-CoA-carboxylase] ligase	5.37232	0.10868	-0.0406821	-0.0492992	-0.241667	0.187561	-0.361816	0.65822	0.950813	0.971554	0.99968	0.323274	0.275558
NZ_CP011454.1	4224598	4225065	+	CDS	GEMMAAP_RS17810	WP_043579311.1	(2Fe-2S)-binding protein	4.10216	0.369191	0.0331376	-0.0491501	0.0913191	-0.0244375	-0.396441	0.143176	0.956667	0.971554	0.99968	0.930601	0.325421
NZ_CP011454.1	2454599	2455618	-	CDS	GEMMAAP_RS10440	WP_026849811.1	thioredoxin-disulfide reductase	6.18895	-0.0843087	0.0274581	-0.0489702	-0.150196	0.407654	-0.0133199	0.662496	0.938856	0.94412	0.99968	0.00633773	0.98413
NZ_CP011454.1	3249644	3250729	+	CDS	GEMMAAP_RS13750	WP_053333744.1	alpha/beta fold hydrolase	4.9577	-0.0331291	0.0714312	-0.0489461	0.256197	-0.0867597	0.0959533	0.916205	0.97176	0.962851	0.99968	0.653013	0.802935
NZ_CP011454.1	3096082	3097524	+	CDS	GEMMAAP_RS13125	WP_026848827.1	MBL fold metallo-hydrolase	7.62889	-0.102827	-0.0846745	-0.0489125	-0.126679	-0.572982	-0.385241	0.515531	0.671892	0.97401	0.99968	0.000106585	0.0453218
NZ_CP011454.1	1104664	1105632	-	CDS	GEMMAAP_RS04595	WP_026850058.1	acetyl-CoA carboxylase carboxyltransferase subunit alpha	8.02167	0.223522	0.185981	-0.0488838	0.0543867	0.362666	0.0810493	0.233045	0.389426	0.949398	0.99968	0.0275478	0.821277
NZ_CP011454.1	3953469	3954392	-	CDS	GEMMAAP_RS16685	WP_043579361.1	cysteine synthase CysM	6.69887	-0.111335	-0.189591	-0.0486505	-0.18563	0.0336259	0.107704	0.629924	0.460495	0.953238	0.99968	0.868971	0.759771
NZ_CP011454.1	4149557	4152733	-	CDS	GEMMAAP_RS17485	WP_075071560.1	hypothetical protein	6.65021	0.0469869	0.0135222	-0.0486103	0.00612794	0.145548	-0.1198	0.856958	0.974565	0.953238	0.99968	0.408696	0.728674
NZ_CP011454.1	4415103	4415642	+	CDS	GEMMAAP_RS18610	WP_026850928.1	DinB family protein	7.26664	2.31727	0.896748	-0.0485262	-0.743918	1.35121	-0.62184	0.0052132	0.316082	0.997938	0.99968	0.0325646	0.607838
NZ_CP011454.1	2949770	2951329	+	CDS	GEMMAAP_RS12525	WP_026849506.1	2%2C3-bisphosphoglycerate-independent phosphoglycerate mutase	8.01946	-0.506832	-0.482223	-0.0482255	-0.171409	-0.169316	-0.195074	0.033776	0.0742003	0.967604	0.99968	0.443981	0.646991
NZ_CP011454.1	4503370	4504593	-	CDS	GEMMAAP_RS18980	WP_043581778.1	MFS transporter	5.57422	0.00202275	0.0845442	-0.0481998	0.0592021	-0.0604968	0.0630245	0.996659	0.953916	0.953238	0.99968	0.744807	0.871307
NZ_CP011454.1	2515494	2518214	-	CDS	GEMMAAP_RS10725	WP_043580724.1	hypothetical protein	6.70089	0.291582	0.286246	-0.0478213	0.0881861	-0.199286	0.234144	0.0721774	0.127454	0.94467	0.99968	0.155047	0.331349
NZ_CP011454.1	1805234	1807072	+	CDS	GEMMAAP_RS07520	WP_145979049.1	amidase	6.12147	0.123971	0.185479	-0.0476183	0.107975	-0.196223	0.0802872	0.476525	0.355908	0.945254	0.99968	0.160579	0.785916
NZ_CP011454.1	4031016	4031342	-	CDS	GEMMAAP_RS16985	WP_026848252.1	nucleotide pyrophosphohydrolase	4.72118	-0.249473	-0.077849	-0.0475419	-0.18052	-0.447863	0.0703719	0.325536	0.871965	0.973029	0.99968	0.0362936	0.898964
NZ_CP011454.1	3962094	3962483	-	CDS	GEMMAAP_RS16725	WP_026848294.1	glyoxalase/bleomycin resistance/dioxygenase family protein	5.14712	-0.434981	-0.632616	-0.0475	0.00416287	-0.110396	-0.436455	0.0543674	0.0315817	0.970316	0.99968	0.598856	0.179617
NZ_CP011454.1	171176	172252	-	CDS	GEMMAAP_RS00765	WP_053333886.1	histidine kinase	3.67373	-0.267441	-0.924402	-0.0474247	-0.315859	0.0760995	0.0844287	0.302189	0.0156604	0.97401	0.99968	0.74803	0.867594
NZ_CP011454.1	1547080	1548168	+	CDS	GEMMAAP_RS06420	WP_026850304.1	hypothetical protein	6.47546	-0.364646	-0.495741	-0.047255	-0.184154	-0.265694	-0.00656027	0.045608	0.0281779	0.953238	0.99968	0.0894821	0.997053
NZ_CP011454.1	658463	660187	+	CDS	GEMMAAP_RS02855	WP_026849343.1	sodium:solute symporter family protein	5.0479	-0.362441	-0.430711	-0.0472375	0.13765	0.449344	-0.221506	0.182618	0.201855	0.973029	0.99968	0.0440394	0.637095
NZ_CP011454.1	2649866	2650186	-	CDS	GEMMAAP_RS20720	WP_053334131.1	hypothetical protein	8.29977	0.117721	0.147442	-0.0467566	0.0647631	-0.0699853	0.360441	0.749229	0.732221	0.973029	0.99968	0.829188	0.4622
NZ_CP011454.1	1085865	1087109	+	CDS	GEMMAAP_RS04520	WP_026850071.1	TonB family protein	6.79639	-0.699325	-0.3498	-0.0467421	-0.382589	0.226823	0.231856	0.0964443	0.517745	0.98687	0.99968	0.551165	0.756714
NZ_CP011454.1	1413921	1417544	+	CDS	GEMMAAP_RS05865	WP_082821100.1	amidohydrolase family protein	7.88403	0.372587	0.140057	-0.0467359	0.0385342	0.200504	0.0246495	0.0658041	0.590068	0.959121	0.99968	0.267251	0.968714
NZ_CP011454.1	2971433	2972224	-	CDS	GEMMAAP_RS12600	WP_053334061.1	CPBP family intramembrane metalloprotease	4.15442	-0.0442129	-0.396406	-0.0465432	-0.0516449	-0.424853	0.146099	0.933222	0.410782	0.979478	0.99968	0.102673	0.793266
NZ_CP011454.1	2237669	2238979	-	CDS	GEMMAAP_RS09460	WP_026850752.1	GAF domain-containing protein	6.56249	-0.0334512	-0.209353	-0.0465274	-0.0164352	-0.430178	-0.0644357	0.863537	0.214397	0.971554	0.99968	0.00149282	0.817527
NZ_CP011454.1	4708463	4709878	-	CDS	GEMMAAP_RS19845	WP_053333843.1	DUF2156 domain-containing protein	5.26625	-0.147459	-0.0347408	-0.0461118	-0.0555279	-0.449186	0.104898	0.641658	0.956667	0.973029	0.99968	0.0451221	0.834103
NZ_CP011454.1	4218371	4220161	+	CDS	GEMMAAP_RS17790	WP_043579562.1	GMC family oxidoreductase	5.59669	-0.223259	-0.373572	-0.0458601	0.183732	0.297112	-0.0179675	0.40138	0.234837	0.973029	0.99968	0.170636	0.987144
NZ_CP011454.1	872549	874999	+	CDS	GEMMAAP_RS03690	WP_026850197.1	polysaccharide biosynthesis tyrosine autokinase	9.33986	-0.120523	-0.103024	-0.0456886	-0.0791384	0.0752157	0.0924356	0.458525	0.590068	0.938926	0.99968	0.607157	0.737004
NZ_CP011454.1	1770660	1771301	-	CDS	GEMMAAP_RS07360	WP_053334379.1	HAD-IIIA family hydrolase	5.83486	0.22283	0.14957	-0.0454082	-0.0435967	0.784454	0.0337671	0.256733	0.81553	0.999272	0.99968	7.51129e-05	0.950658
NZ_CP011454.1	3680056	3681696	-	CDS	GEMMAAP_RS20360	WP_145979170.1	hypothetical protein	7.04984	0.279549	0.53247	-0.0451771	0.31744	-0.46053	-0.0363776	0.588259	0.317946	0.992097	0.99968	0.26376	0.98413
NZ_CP011454.1	4042174	4042695	-	CDS	GEMMAAP_RS17045	WP_053333582.1	nuclear transport factor 2 family protein	3.88734	-0.135197	0.188864	-0.0449418	-0.212545	-0.149187	-0.395487	0.74443	0.733052	0.978517	0.99968	0.625384	0.46572
NZ_CP011454.1	4520008	4523424	-	CDS	GEMMAAP_RS19025	WP_053334611.1	hypothetical protein	6.67497	-0.202519	0.0642361	-0.0446752	0.00277501	0.152999	0.185633	0.324167	0.854615	0.96205	0.99968	0.392119	0.578654
NZ_CP011454.1	2233147	2234343	-	CDS	GEMMAAP_RS09435	WP_026850756.1	tryptophan synthase subunit beta	7.4076	0.0307221	0.0572963	-0.0446485	-0.040339	-0.2689	-0.0780807	0.881555	0.799756	0.938926	0.99968	0.0365157	0.771957
NZ_CP011454.1	137998	140415	-	CDS	GEMMAAP_RS00605	WP_053333874.1	serine/threonine-protein kinase	5.90135	0.396325	0.477342	-0.0444719	0.173874	-0.133642	0.142065	0.0404759	0.045365	0.960898	0.99968	0.427352	0.659863
NZ_CP011454.1	4638182	4638478	-	CDS	GEMMAAP_RS20415	WP_145979255.1	hypothetical protein	3.6605	0.114518	0.0066371	-0.0444479	0.201602	0.162233	0.0718782	0.810294	0.995674	0.986476	0.99968	0.625853	0.935404
NZ_CP011454.1	1810129	1810365	+	CDS	GEMMAAP_RS07535	WP_026850472.1	hypothetical protein	2.44829	-0.0492408	0.677733	-0.0442695	0.120941	-0.317237	0.0278139	0.951778	0.284567	0.994205	0.99968	0.457968	0.988912
NZ_CP011454.1	3690875	3692179	+	CDS	GEMMAAP_RS15615	WP_082821392.1	ATP-binding cassette domain-containing protein	7.3393	-0.46131	-0.529181	-0.0441685	-0.10516	-0.165691	-0.0480515	0.0231172	0.0272957	0.963219	0.99968	0.360807	0.916712
NZ_CP011454.1	4687041	4689755	-	CDS	GEMMAAP_RS19760	WP_026848911.1	DNA mismatch repair protein MutS	7.31432	0.104494	0.414362	-0.0439429	-0.0725217	0.53649	0.141346	0.691642	0.0989584	0.969794	0.99968	0.00735297	0.726158
NZ_CP011454.1	4223924	4224553	+	CDS	GEMMAAP_RS17805	WP_145979220.1	hypothetical protein	4.33961	0.0262595	-0.234552	-0.043776	-0.0850447	0.049648	-0.152417	0.965817	0.66865	0.985391	0.99968	0.894042	0.833527
NZ_CP011454.1	4671154	4673436	-	CDS	GEMMAAP_RS19685	WP_053333831.1	serine/threonine-protein kinase	6.60558	0.324388	0.348787	-0.0437325	0.0842247	-0.00172714	0.184624	0.0583255	0.083596	0.953012	0.99968	0.992557	0.499462
NZ_CP011454.1	2994889	2995878	-	CDS	GEMMAAP_RS12695	WP_026849478.1	NTP transferase domain-containing protein	6.26555	0.0169371	-0.0443751	-0.0436618	0.228581	-0.323121	0.0205987	0.960292	0.920484	0.967604	0.99968	0.0681149	0.977484
NZ_CP011454.1	4649315	4650547	+	CDS	GEMMAAP_RS19565	WP_145979259.1	hypothetical protein	6.53685	0.383859	0.105239	-0.0434454	0.0195889	-0.021852	0.131795	0.107989	0.777555	0.973029	0.99968	0.931721	0.753609
NZ_CP011454.1	2310016	2311833	-	CDS	GEMMAAP_RS09785	WP_053334494.1	hypothetical protein	6.74941	-0.164219	0.0101136	-0.0433636	-0.0538121	-0.127832	0.0177342	0.36966	0.979751	0.953238	0.99968	0.426147	0.977484
NZ_CP011454.1	1555420	1556883	-	CDS	GEMMAAP_RS06460	WP_026850311.1	glutamyl-tRNA reductase	8.42096	0.0435163	0.0521569	-0.0430882	0.0404455	0.356754	-0.00079447	0.839221	0.846533	0.948562	0.99968	0.014193	0.999165
NZ_CP011454.1	865533	866507	-	CDS	GEMMAAP_RS03665	WP_075071414.1	glycosyltransferase	7.67367	0.291191	0.347463	-0.0429494	0.304649	0.0593679	0.104504	0.461531	0.436337	0.986205	0.99968	0.878522	0.900925
NZ_CP011454.1	2671962	2672666	+	CDS	GEMMAAP_RS11395	WP_026849676.1	cell division ATP-binding protein FtsE	5.84061	0.409609	0.614206	-0.0428044	0.148255	0.419348	0.13358	0.0184616	0.00831815	0.960898	0.99968	0.00509726	0.654432
NZ_CP011454.1	2129628	2131349	-	CDS	GEMMAAP_RS08910	WP_026850830.1	hypothetical protein	7.18001	-0.0105808	0.0456788	-0.0428019	-0.067126	0.380367	0.0142028	0.973597	0.890172	0.957291	0.99968	0.0164752	0.98413
NZ_CP011454.1	2735880	2737529	-	CDS	GEMMAAP_RS11655	WP_082821261.1	family 10 glycosylhydrolase	5.77532	-0.307641	-0.0399055	-0.0426349	-0.111872	-0.00854869	0.239786	0.163713	0.93373	0.971554	0.99968	0.972482	0.49069
NZ_CP011454.1	317345	317812	-	CDS	GEMMAAP_RS01410	WP_026849134.1	hypothetical protein	5.48247	0.111846	0.038003	-0.0425933	-0.134535	-0.10726	-0.0501972	0.772348	0.961265	0.978517	0.99968	0.68149	0.942903
NZ_CP011454.1	2043269	2045698	+	CDS	GEMMAAP_RS08495	WP_026850621.1	UvrD-helicase domain-containing protein	7.56268	0.213426	0.233266	-0.0424643	0.00951755	0.304585	0.202433	0.153731	0.158205	0.945254	0.99968	0.0203233	0.373876
NZ_CP011454.1	3321395	3322270	+	CDS	GEMMAAP_RS14100	WP_158514868.1	DMT family transporter	5.44631	0.382808	0.351502	-0.0424483	0.190277	-0.228214	0.147294	0.167271	0.312809	0.973029	0.99968	0.318008	0.754018
NZ_CP011454.1	4567151	4568164	+	CDS	GEMMAAP_RS19230	WP_026851021.1	MlaD family protein	5.68694	-0.499087	-0.0308137	-0.0423833	-0.263741	-0.468911	-0.502252	0.0628951	0.960912	0.973029	0.99968	0.0430262	0.195649
NZ_CP011454.1	15736	17106	-	CDS	GEMMAAP_RS00075	WP_026848940.1	MFS transporter	5.04122	-0.207369	-0.347169	-0.0421657	0.264333	-0.451281	-0.00709699	0.386229	0.226907	0.973029	0.99968	0.0183465	0.994981
NZ_CP011454.1	4232303	4235305	+	CDS	GEMMAAP_RS17860	WP_145979221.1	amidohydrolase family protein	6.60934	0.22007	0.00414791	-0.0421422	0.0107247	0.288588	-0.131237	0.287929	0.993392	0.967869	0.99968	0.0991468	0.718796
NZ_CP011454.1	630755	632209	-	CDS	GEMMAAP_RS02775	WP_026849333.1	M20/M25/M40 family metallo-hydrolase	5.19976	-0.087172	-0.0874164	-0.0419693	0.12849	-0.179128	0.000793866	0.668838	0.763685	0.960416	0.99968	0.20545	0.999165
NZ_CP011454.1	3346708	3347148	-	CDS	GEMMAAP_RS14205	WP_026848662.1	universal stress protein	4.92908	-0.279703	0.0642241	-0.0418659	-0.132279	-0.266778	0.0161683	0.152717	0.995674	0.965288	0.99968	0.11506	0.998814
NZ_CP011454.1	330900	334022	-	CDS	GEMMAAP_RS01470	WP_026849142.1	GAF domain-containing protein	8.98885	0.353815	0.353071	-0.0417027	0.0165845	0.0621563	0.320191	0.0806616	0.110599	0.965288	0.99968	0.763111	0.28469
NZ_CP011454.1	3144318	3144866	-	CDS	GEMMAAP_RS13320	WP_053333767.1	ComEA family DNA-binding protein	4.28447	-0.132319	-0.373693	-0.040829	0.0740579	-0.241326	-0.0439442	0.733706	0.382691	0.985602	0.99968	0.413342	0.963271
NZ_CP011454.1	4433920	4434657	-	CDS	GEMMAAP_RS18675	WP_026850939.1	ATP-binding protein	7.17311	0.355505	0.195808	-0.0406796	0.192408	-0.180531	0.158928	0.171457	0.5551	0.973029	0.99968	0.443853	0.726775
NZ_CP011454.1	4425626	4426606	-	CDS	GEMMAAP_RS18640	WP_075071702.1	ornithine cyclodeaminase family protein	5.05494	-0.0868487	-0.0360029	-0.040603	0.0758713	-0.382925	0.114308	0.823191	0.960912	0.979478	0.99968	0.117327	0.834103
NZ_CP011454.1	3565983	3567278	-	CDS	GEMMAAP_RS15095	WP_026848532.1	acetyl-CoA C-acyltransferase FadI	6.23572	-0.0114582	0.0412141	-0.0404906	0.00297673	0.0521998	-0.0940822	0.962203	0.878105	0.948562	0.99968	0.713069	0.718796
NZ_CP011454.1	2536862	2537911	-	CDS	GEMMAAP_RS10795	WP_082821234.1	deoxyribose-phosphate aldolase	7.52591	-0.0554063	0.078437	-0.0404454	-0.0773663	-0.0776748	0.135019	0.823076	0.788636	0.965288	0.99968	0.677107	0.687751
NZ_CP011454.1	3977707	3979020	+	CDS	GEMMAAP_RS16785	WP_026848287.1	alpha-hydroxy-acid oxidizing protein	6.2205	0.208812	0.234239	-0.0403757	0.185615	0.0195295	-0.0948651	0.330993	0.364174	0.971554	0.99968	0.931346	0.809282
NZ_CP011454.1	3994174	3995697	+	CDS	GEMMAAP_RS16865	WP_026848272.1	fumarate hydratase	7.25288	0.0453043	-0.0987649	-0.0403344	-0.121998	-0.0429051	0.0333284	0.833735	0.66865	0.953238	0.99968	0.801185	0.935404
NZ_CP011454.1	3714571	3715584	-	CDS	GEMMAAP_RS15735	WP_026848446.1	SPFH domain-containing protein	7.15401	-0.475237	-0.502421	-0.040176	-0.135368	-0.0743697	-0.408698	0.0507864	0.0736216	0.973029	0.99968	0.763111	0.253317
NZ_CP011454.1	3635449	3637614	+	CDS	GEMMAAP_RS15360	WP_053333667.1	prolyl oligopeptidase family serine peptidase	5.55952	0.288314	0.333722	-0.0401039	0.101211	-0.352641	0.188494	0.152774	0.165867	0.971436	0.99968	0.0362936	0.56133
NZ_CP011454.1	7302	7877	-	CDS	GEMMAAP_RS00040	WP_026848936.1	orotate phosphoribosyltransferase	8.22142	0.437747	0.659034	-0.0399071	0.120904	0.182274	0.362521	0.0169006	0.00648785	0.960898	0.99968	0.256716	0.154865
NZ_CP011454.1	1422028	1422795	+	CDS	GEMMAAP_RS05880	WP_026849846.1	hypothetical protein	4.30924	0.232707	0.107293	-0.0396393	0.00577495	0.623821	0.0405983	0.381177	0.807812	0.973029	0.99968	0.00636234	0.955293
NZ_CP011454.1	4358390	4359643	-	CDS	GEMMAAP_RS18365	WP_043581760.1	hypothetical protein	6.96874	-0.217516	-0.265695	-0.0396155	-0.20148	0.62152	-0.0363672	0.386942	0.355908	0.973029	0.99968	0.00468445	0.956123
NZ_CP011454.1	4141805	4143394	+	CDS	GEMMAAP_RS17455	WP_026848193.1	ATP-dependent DNA ligase	4.93023	0.312988	0.277521	-0.0395531	-0.0176581	-0.150815	0.161735	0.190761	0.35986	0.973029	0.99968	0.495172	0.705887
NZ_CP011454.1	3888081	3889079	+	CDS	GEMMAAP_RS16430	WP_145979193.1	transporter	6.08688	-0.117072	-0.12626	-0.039455	0.0497538	-0.188858	-0.175224	0.631588	0.681213	0.973029	0.99968	0.301919	0.631292
NZ_CP011454.1	3898016	3898504	-	CDS	GEMMAAP_RS16475	WP_145979194.1	hypothetical protein	4.6144	-0.205922	-0.152206	-0.0394338	-0.215499	-0.575054	-0.125196	0.44759	0.712708	0.97401	0.99968	0.00718173	0.775411
NZ_CP011454.1	2087622	2088119	+	CDS	GEMMAAP_RS08725	WP_026850858.1	UvrB/UvrC motif-containing protein	7.36599	-0.19784	-0.0423577	-0.0393985	-0.0908199	-0.0650157	0.255169	0.323126	0.91024	0.967604	0.99968	0.741634	0.388505
NZ_CP011454.1	4484441	4484866	-	CDS	GEMMAAP_RS18885	WP_053334603.1	DUF1579 family protein	5.80485	-0.0394794	-0.0823198	-0.0393069	0.0944654	0.0521497	0.19715	0.891305	0.808957	0.973029	0.99968	0.788234	0.526485
NZ_CP011454.1	1550934	1551653	-	CDS	GEMMAAP_RS06440	WP_026850308.1	bacillithiol biosynthesis deacetylase BshB1	5.3384	0.34468	0.146903	-0.039178	0.0268182	1.16704	0.24677	0.0896647	0.608546	0.971554	0.99968	1.147e-06	0.500721
NZ_CP011454.1	229668	231071	+	CDS	GEMMAAP_RS01005	WP_043580101.1	DUF1552 domain-containing protein	6.5308	0.264879	0.159012	-0.0388535	0.158517	0.581483	-0.0742616	0.175179	0.534007	0.971554	0.99968	0.00114504	0.84586
NZ_CP011454.1	681554	682495	+	CDS	GEMMAAP_RS02950	WP_026849357.1	hypothetical protein	6.4258	0.527307	0.226779	-0.0383011	0.0403202	0.184243	0.0872943	0.00138611	0.214045	0.953238	0.99968	0.164084	0.75256
NZ_CP011454.1	4463487	4464392	+	CDS	GEMMAAP_RS18790	WP_026850957.1	creatininase family protein	5.31208	0.0434755	-0.0286627	-0.038206	0.149655	0.0572549	0.183978	0.930719	0.976264	0.973029	0.99968	0.810569	0.655851
NZ_CP011454.1	672467	673561	-	CDS	GEMMAAP_RS02915	WP_026849352.1	ABC transporter permease	5.55372	0.128723	0.20385	-0.0379555	-0.0981334	0.280556	0.233744	0.533053	0.390579	0.967674	0.99968	0.0835836	0.428351
NZ_CP011454.1	465852	468404	+	CDS	GEMMAAP_RS02035	WP_075071387.1	serine/threonine-protein kinase	5.64169	0.224332	0.105355	-0.0376631	0.14909	-0.0182109	0.20249	0.324167	0.768694	0.973029	0.99968	0.938396	0.57552
NZ_CP011454.1	3288307	3289632	-	CDS	GEMMAAP_RS13930	WP_158514866.1	TolC family protein	5.07569	0.0404206	-0.132121	-0.0371543	-0.0922137	-0.0762339	0.101831	0.915596	0.75111	0.976271	0.99968	0.769855	0.84318
NZ_CP011454.1	2918088	2919482	-	CDS	GEMMAAP_RS12365	WP_202969127.1	phosphoglucosamine mutase	6.92593	-0.215847	-0.286819	-0.0370689	-0.251579	-0.134663	0.01675	0.25685	0.181012	0.999272	0.99968	0.435125	0.980408
NZ_CP011454.1	2432079	2433434	-	CDS	GEMMAAP_RS10315	WP_026849830.1	nucleotide sugar dehydrogenase	9.71205	-0.735947	-0.455876	-0.0370336	-0.249169	0.0523572	-0.54831	0.0327521	0.226408	0.986836	0.99968	0.886103	0.286709
NZ_CP011454.1	2231453	2233150	-	CDS	GEMMAAP_RS09430	WP_026850757.1	HEAT repeat domain-containing protein	7.44891	0.396249	0.224934	-0.0368387	-0.078986	0.174625	-0.00198192	0.00863528	0.165959	0.953238	0.99968	0.181596	0.998029
NZ_CP011454.1	408708	409847	+	CDS	GEMMAAP_RS01840	WP_026849196.1	hypothetical protein	7.06075	0.096317	0.11936	-0.0367729	0.111237	-0.116594	0.164564	0.673396	0.767724	0.971554	0.99968	0.52206	0.629414
NZ_CP011454.1	2175041	2175814	-	CDS	GEMMAAP_RS09140	WP_026850798.1	succinate dehydrogenase/fumarate reductase iron-sulfur subunit	7.76713	0.343506	0.229885	-0.0367296	-0.000704482	0.159192	-0.117133	0.119252	0.363266	0.973029	0.99968	0.435633	0.77379
NZ_CP011454.1	4061410	4062444	+	CDS	GEMMAAP_RS17130	WP_043579345.1	LacI family transcriptional regulator	7.57048	-0.235794	-0.163123	-0.0366625	-0.179958	0.193661	-0.33996	0.141218	0.380035	0.959624	0.99968	0.174852	0.133146
NZ_CP011454.1	3394734	3395189	-	CDS	GEMMAAP_RS14395	WP_026848633.1	YidB family protein	5.73101	-0.319634	-0.207632	-0.0365605	-0.259104	-0.26129	0.244823	0.120435	0.468119	0.973029	0.99968	0.122562	0.408649
NZ_CP011454.1	1148394	1148780	-	CDS	GEMMAAP_RS04735	WP_026850037.1	glycine cleavage system protein GcvH	7.70366	-0.334647	-0.238603	-0.0360502	-0.128658	-0.315475	0.0367143	0.144435	0.367063	0.973029	0.99968	0.117327	0.95318
NZ_CP011454.1	2051790	2052497	+	CDS	GEMMAAP_RS08530	WP_053334437.1	polyphenol oxidase family protein	6.5402	-0.109092	0.167126	-0.0359234	-0.144309	-0.423816	-0.363521	0.601734	0.512794	0.971554	0.99968	0.0100535	0.174172
NZ_CP011454.1	3065594	3065914	+	CDS	GEMMAAP_RS20050	WP_082821300.1	CPXCG motif-containing cysteine-rich protein	6.24308	0.176445	0.101393	-0.0359078	0.154869	0.137838	0.103912	0.461467	0.772317	0.973029	0.99968	0.505422	0.809282
NZ_CP011454.1	4134903	4135661	+	CDS	GEMMAAP_RS17425	WP_026848199.1	DUF481 domain-containing protein	4.39783	0.290628	0.278705	-0.035794	0.117739	0.269244	-0.0649036	0.263038	0.413513	0.999272	0.99968	0.212947	0.912949
NZ_CP011454.1	292392	292922	+	CDS	GEMMAAP_RS01300	WP_053333914.1	MarR family transcriptional regulator	6.04105	0.118155	0.00771858	-0.0356997	-0.168921	-0.65423	0.314826	0.659176	0.990126	0.97401	0.99968	0.00168111	0.346075
NZ_CP011454.1	355455	355817	-	CDS	GEMMAAP_RS01565	WP_026849156.1	TIGR04076 family protein	6.76118	0.113484	0.805034	-0.035694	0.434851	0.270366	0.238685	0.732358	0.0167026	0.980745	0.99968	0.264478	0.614422
NZ_CP011454.1	3894644	3895420	+	CDS	GEMMAAP_RS16460	WP_026848332.1	SDR family oxidoreductase	4.72488	0.821418	0.832588	-0.0354463	0.267221	0.136676	0.186554	0.000744473	0.00831815	0.973029	0.99968	0.479968	0.611171
NZ_CP011454.1	3892496	3892738	-	CDS	GEMMAAP_RS16450	WP_026848333.1	hypothetical protein	5.11053	-0.131616	-0.404038	-0.0353218	-0.139401	-0.313897	0.205212	0.735852	0.349015	0.99036	0.99968	0.236654	0.69994
NZ_CP011454.1	2180623	2181093	-	CDS	GEMMAAP_RS09165	WP_158514793.1	molybdenum cofactor biosynthesis protein MoaE	6.60881	0.0689327	0.0517712	-0.0351187	-0.00505257	0.135487	0.0596476	0.995555	0.87335	0.971554	0.99968	0.382849	0.867406
NZ_CP011454.1	3059093	3059812	-	CDS	GEMMAAP_RS12960	WP_043580631.1	hypothetical protein	7.55269	-0.717232	-0.90613	-0.0350756	-0.295041	-0.0785014	-0.212068	0.133107	0.0972205	0.995081	0.99968	0.872235	0.811729
NZ_CP011454.1	3673472	3675580	-	CDS	GEMMAAP_RS15545	WP_053333654.1	MASE1 domain-containing protein	6.62532	0.100496	0.0782286	-0.0350305	0.0062852	-0.163908	0.239335	0.523055	0.712708	0.999272	0.99968	0.197021	0.257985
NZ_CP011454.1	3696299	3697231	-	CDS	GEMMAAP_RS15635	WP_053333652.1	type II secretion system F family protein	7.58904	-0.00314128	0.696355	-0.0350134	0.000916658	0.429355	0.03706	0.996133	0.0277129	0.980016	0.99968	0.073418	0.963271
NZ_CP011454.1	2410027	2411505	-	CDS	GEMMAAP_RS10245	WP_145979085.1	HD-GYP domain-containing protein	6.80618	0.0479743	-0.0230182	-0.0349747	-0.00040966	-0.317873	0.0941851	0.840451	0.953916	0.971554	0.99968	0.0451221	0.777779
NZ_CP011454.1	1762002	1762751	+	CDS	GEMMAAP_RS07325	WP_026850443.1	Bax inhibitor-1/YccA family protein	8.1327	-0.459929	-0.407109	-0.0349051	0.0197453	-0.478157	-0.527952	0.078212	0.153746	0.978605	0.99968	0.0370616	0.154242
NZ_CP011454.1	2336226	2336789	-	CDS	GEMMAAP_RS09910	WP_145979082.1	pantetheine-phosphate adenylyltransferase	5.78781	0.425107	0.425902	-0.0346523	0.0574548	-0.232141	-0.228186	0.0240088	0.0583158	0.973029	0.99968	0.154419	0.445944
NZ_CP011454.1	3145120	3151671	-	CDS	GEMMAAP_RS13325	WP_026848799.1	cell surface protein SprA	8.57398	-0.369251	-0.18715	-0.0346403	0.0419088	0.107181	0.098744	0.0390572	0.359535	0.971436	0.99968	0.527083	0.76256
NZ_CP011454.1	2427157	2430483	-	CDS	GEMMAAP_RS10300	WP_026849832.1	preprotein translocase subunit SecA	9.6312	-0.56316	-0.357701	-0.0345751	-0.114173	-0.0745108	-0.400345	0.0759855	0.311008	0.986616	0.99968	0.826044	0.417166
NZ_CP011454.1	1078393	1080516	-	CDS	GEMMAAP_RS04495	WP_043581073.1	GWxTD domain-containing protein	7.95891	-0.082053	-0.127079	-0.034451	-0.113466	-0.310037	-0.0730965	0.623807	0.467706	0.95471	0.99968	0.0157073	0.785916
NZ_CP011454.1	2808985	2811471	+	CDS	GEMMAAP_RS11930	WP_158514842.1	endopeptidase La	8.16625	0.269364	0.165028	-0.0344293	-0.0235233	-0.239352	0.0678405	0.119252	0.414764	0.968689	0.99968	0.11506	0.84265
NZ_CP011454.1	1947881	1948531	+	CDS	GEMMAAP_RS08045	WP_026850550.1	riboflavin synthase	6.06592	-0.0743316	-0.345106	-0.0342005	-0.0819351	0.244572	0.0470885	0.734299	0.113334	0.971554	0.99968	0.118637	0.910232
NZ_CP011454.1	2796273	2796722	-	CDS	GEMMAAP_RS11885	WP_053334099.1	TerB family tellurite resistance protein	5.767	0.161095	-0.000843849	-0.0339844	0.0156998	0.27291	-0.114935	0.430279	0.998218	0.973029	0.99968	0.105782	0.752323
NZ_CP011454.1	3563815	3565971	-	CDS	GEMMAAP_RS15090	WP_043579821.1	fatty acid oxidation complex subunit alpha FadJ	6.65237	0.224647	0.386195	-0.0336873	-0.0524123	0.149274	-0.0534827	0.0954332	0.0179156	0.953238	0.99968	0.206114	0.882543
NZ_CP011454.1	2360262	2360792	-	CDS	GEMMAAP_RS10035	WP_026850675.1	hypothetical protein	4.91139	0.139368	-0.0693886	-0.0333978	-0.155253	0.910379	0.334105	0.562922	0.895056	0.973029	0.99968	5.50368e-05	0.34434
NZ_CP011454.1	3432427	3433593	+	CDS	GEMMAAP_RS14540	WP_026848610.1	thiolase family protein	6.7948	-0.0434723	0.331055	-0.0331292	0.118642	0.279987	0.215772	0.90643	0.246864	0.979478	0.99968	0.199656	0.614524
NZ_CP011454.1	2002282	2002533	-	CDS	GEMMAAP_RS08300	WP_026850592.1	30S ribosomal protein S20	8.10558	-0.00681035	0.0764181	-0.0329887	0.0771568	0.509367	-0.0335914	0.992211	0.87335	0.985391	0.99968	0.0385824	0.970223
NZ_CP011454.1	1640170	1641021	+	CDS	GEMMAAP_RS06800	WP_043581344.1	hypothetical protein	5.66477	-0.757092	-0.636814	-0.032964	-0.267641	-0.385403	-0.494569	0.000800818	0.0176763	0.973029	0.99968	0.0317289	0.0742719
NZ_CP011454.1	1280681	1281103	+	CDS	GEMMAAP_RS05365	WP_026849930.1	hypothetical protein	5.33122	0.274023	0.124859	-0.0329284	0.0558106	0.578436	0.0334187	0.325131	0.772804	0.985391	0.99968	0.0155002	0.970223
NZ_CP011454.1	4098136	4098459	+	CDS	GEMMAAP_RS17290	WP_026848215.1	hypothetical protein	4.40386	0.00878499	0.0312656	-0.0323502	0.0587045	-0.258628	0.108942	0.989752	0.99044	0.986476	0.99968	0.218803	0.811402
NZ_CP011454.1	4248534	4250630	+	CDS	GEMMAAP_RS17925	WP_053333532.1	polyphosphate kinase 1	6.39051	0.269503	0.166672	-0.0320205	0.00807101	-0.349125	0.282254	0.180805	0.535019	0.973029	0.99968	0.0392309	0.335061
NZ_CP011454.1	994053	995681	+	CDS	GEMMAAP_RS04145	WP_075071420.1	acyl--CoA ligase	8.77978	0.0332633	-0.0407099	-0.0317982	-0.107236	-0.00493313	0.133889	0.894509	0.897927	0.971554	0.99968	0.979134	0.659705
NZ_CP011454.1	1784302	1785486	+	CDS	GEMMAAP_RS07410	WP_026850456.1	acyl-CoA dehydrogenase	6.22611	-0.163521	-0.0152052	-0.0316668	0.234758	0.129357	0.0189479	0.391257	0.97091	0.973029	0.99968	0.426147	0.975743
NZ_CP011454.1	795222	796049	-	CDS	GEMMAAP_RS03395	WP_202969184.1	endonuclease III	6.06756	0.286705	0.279058	-0.0315063	-0.208387	0.352251	0.259351	0.119252	0.201855	0.973029	0.99968	0.0250802	0.344894
NZ_CP011454.1	1766646	1767896	+	CDS	GEMMAAP_RS07340	WP_026850445.1	aminotransferase class V-fold PLP-dependent enzyme	6.22739	-0.24862	0.00533058	-0.0314877	0.0236104	0.0795108	-0.0408461	0.135483	0.990126	0.971554	0.99968	0.600408	0.912949
NZ_CP011454.1	779044	780963	-	CDS	GEMMAAP_RS03320	WP_158514710.1	PAS domain-containing hybrid sensor histidine kinase/response regulator	7.32962	0.298857	0.280423	-0.0310734	0.182437	-0.394988	0.422919	0.19306	0.292814	0.978632	0.99968	0.0481888	0.195649
NZ_CP011454.1	3563245	3563790	-	CDS	GEMMAAP_RS15085	WP_026848534.1	DinB family protein	4.73292	0.310729	0.0712332	-0.0308677	-0.114124	0.216461	0.110919	0.203876	0.880669	0.982528	0.99968	0.302265	0.81101
NZ_CP011454.1	2401418	2401975	-	CDS	GEMMAAP_RS10195	WP_026850651.1	peptidoglycan-associated lipoprotein Pal	7.74696	-0.0295882	0.0252037	-0.0307588	0.0514936	-0.016305	-0.2481	0.90779	0.941913	0.973029	0.99968	0.932442	0.342104
NZ_CP011454.1	3729216	3731219	+	CDS	GEMMAAP_RS15800	WP_053333644.1	EAL domain-containing protein	3.89273	0.010801	-0.0667643	-0.0306829	0.0304295	-0.332914	0.0055714	0.987033	0.919334	0.988719	0.99968	0.184365	0.996981
NZ_CP011454.1	875817	876605	+	CDS	GEMMAAP_RS03700	WP_053334294.1	sugar transferase	8.37561	0.0882139	0.0104409	-0.030517	0.084849	0.217269	0.057955	0.681735	0.977754	0.973029	0.99968	0.184783	0.884019
NZ_CP011454.1	1954883	1955731	+	CDS	GEMMAAP_RS08095	WP_158514778.1	PTS system mannose/fructose/sorbose family transporter subunit IID	7.20589	0.16751	-0.041013	-0.0303336	-0.0382535	-0.247325	0.139131	0.403186	0.914132	0.973029	0.99968	0.138347	0.674702
NZ_CP011454.1	1892610	1892963	+	CDS	GEMMAAP_RS07840	WP_026850517.1	hypothetical protein	5.40607	0.298233	0.431298	-0.0303316	0.0565385	0.431733	0.0974319	0.090255	0.0462572	0.973029	0.99968	0.00479254	0.759707
NZ_CP011454.1	4262142	4262753	+	CDS	GEMMAAP_RS17965	WP_026848113.1	hypothetical protein	5.49423	-0.36968	-0.391918	-0.0302727	0.0419385	-0.446676	-0.0979428	0.114821	0.172383	0.982182	0.99968	0.0227767	0.817825
NZ_CP011454.1	1696103	1699306	+	CDS	GEMMAAP_RS07045	WP_053334362.1	carboxypeptidase regulatory-like domain-containing protein	3.50066	-0.357466	-0.498517	-0.0300915	0.0340437	-0.366812	0.106543	0.267926	0.243995	0.994205	0.99968	0.140256	0.854294
NZ_CP011454.1	3203390	3203743	+	CDS	GEMMAAP_RS13550	WP_145979140.1	flagellar protein FliS	7.83687	-0.255972	-0.447294	-0.0300819	-0.0172257	-0.317735	-0.0279803	0.289303	0.0925297	0.982182	0.99968	0.127895	0.970223
NZ_CP011454.1	4428032	4429393	-	CDS	GEMMAAP_RS18650	WP_026850935.1	MFS transporter	5.27794	-0.282629	0.0602369	-0.0300721	0.293026	-0.315528	-0.0150256	0.222194	0.898808	0.980016	0.99968	0.100248	0.997676
NZ_CP011454.1	71745	72041	-	CDS	GEMMAAP_RS00305	WP_026848974.1	antibiotic biosynthesis monooxygenase	3.47696	-0.304856	0.141409	-0.0298641	0.38427	0.133233	0.0261718	0.458608	0.846777	0.995456	0.99968	0.687904	0.986152
NZ_CP011454.1	2553797	2554495	-	CDS	GEMMAAP_RS10865	WP_026849749.1	SH3 domain-containing protein	7.87862	-0.145116	0.0976815	-0.0296594	-0.0198953	0.316913	-0.0990909	0.447146	0.69828	0.973029	0.99968	0.0452941	0.76256
NZ_CP011454.1	4434753	4436303	-	CDS	GEMMAAP_RS18680	WP_026850940.1	HDOD domain-containing protein	6.84719	0.249225	0.0464621	-0.0294797	0.0515908	-0.437357	0.0110516	0.171648	0.891723	0.973029	0.99968	0.00738993	0.98831
NZ_CP011454.1	3858876	3859439	-	CDS	GEMMAAP_RS16330	WP_053333618.1	LuxR C-terminal-related transcriptional regulator	3.58822	-0.180775	-0.00424451	-0.0293831	-0.0779811	-0.280864	0.0146536	0.645068	0.996159	0.994205	0.99968	0.311534	0.993222
NZ_CP011454.1	3282563	3282868	-	CDS	GEMMAAP_RS13910	WP_145979148.1	hypothetical protein	4.20231	0.0888541	-0.429279	-0.0293134	0.00253217	0.180435	-0.204799	0.834808	0.323707	0.994205	0.99968	0.548571	0.739684
NZ_CP011454.1	3803438	3804547	-	CDS	GEMMAAP_RS16070	WP_145979181.1	DUF4956 domain-containing protein	5.51145	0.124806	0.145511	-0.0293068	-0.0914243	-0.202767	0.143401	0.560208	0.589528	0.97401	0.99968	0.216294	0.660581
NZ_CP011454.1	1959685	1960911	+	CDS	GEMMAAP_RS08120	WP_026850563.1	hypothetical protein	5.92462	0.578172	0.337932	-0.0286449	0.107873	0.271519	0.102339	0.00390665	0.133597	0.97401	0.99968	0.102825	0.773541
NZ_CP011454.1	650375	653716	+	CDS	GEMMAAP_RS02840	WP_043580552.1	VCBS repeat-containing protein	5.0941	-0.122072	-0.083248	-0.0285672	-0.167786	0.322104	0.0944425	0.687889	0.868103	0.986836	0.99968	0.12442	0.845705
NZ_CP011454.1	480832	483528	+	CDS	GEMMAAP_RS02090	WP_053333959.1	protein kinase	5.09481	0.119189	0.325394	-0.0285439	0.251276	-0.190605	0.327804	0.688738	0.30396	0.986616	0.99968	0.367081	0.350125
NZ_CP011454.1	1310550	1311026	+	CDS	GEMMAAP_RS05500	WP_053334229.1	transcriptional repressor	5.50428	0.406725	0.133281	-0.028515	0.0764842	-0.0628291	0.258574	0.0704433	0.700325	0.982528	0.99968	0.983438	0.445944
NZ_CP011454.1	3630720	3631595	-	CDS	GEMMAAP_RS15340	WP_026848497.1	protein phosphatase 2C domain-containing protein	8.36347	0.0913046	0.345895	-0.0284005	0.0506903	-0.140595	0.126064	0.749229	0.181134	0.984099	0.99968	0.524792	0.770691
NZ_CP011454.1	4275783	4276787	-	CDS	GEMMAAP_RS18030	WP_043579298.1	hypothetical protein	3.55373	-0.735541	-0.398536	-0.0282315	0.119095	-0.627252	-0.0913235	0.0622661	0.469686	0.996558	0.99968	0.0468199	0.914536
NZ_CP011454.1	3412477	3413172	-	CDS	GEMMAAP_RS14465	WP_082821353.1	CAAX prenyl protease-related protein	7.69072	-0.629233	-0.521752	-0.0280087	-0.325493	0.0579083	-0.253544	0.0549705	0.1544	0.994205	0.99968	0.86688	0.659705
NZ_CP011454.1	830248	832605	+	CDS	GEMMAAP_RS03525	WP_026850219.1	PQQ-binding-like beta-propeller repeat protein	7.10052	0.208322	0.175255	-0.0279875	0.0874684	0.21009	0.137119	0.247221	0.413513	0.973029	0.99968	0.182503	0.662173
NZ_CP011454.1	1419491	1421845	+	CDS	GEMMAAP_RS05875	WP_026849847.1	YfhO family protein	7.04555	0.0258049	0.0662924	-0.0279499	0.0864324	-0.319662	-0.134452	0.915082	0.891895	0.973029	0.99968	0.0240015	0.637095
NZ_CP011454.1	3711767	3711979	-	CDS	GEMMAAP_RS15715	WP_026848450.1	DUF350 domain-containing protein	4.89358	-0.552885	-0.717348	-0.02744	-0.0028309	0.494196	-0.427113	0.0681456	0.0625778	0.994205	0.99968	0.0566665	0.374705
NZ_CP011454.1	1317576	1318580	+	CDS	GEMMAAP_RS05530	WP_082821088.1	N-acetylmuramic acid 6-phosphate etherase	6.41567	-0.176941	-0.144743	-0.0274134	-0.173073	0.546348	-0.0103346	0.332162	0.538989	0.973029	0.99968	0.00100051	0.989873
NZ_CP011454.1	3634344	3635408	+	CDS	GEMMAAP_RS15355	WP_026848494.1	alpha/beta hydrolase	4.49021	-0.133063	0.0710874	-0.0272948	-0.214296	-0.585491	0.339668	0.720871	0.919334	0.994205	0.99968	0.0148084	0.411031
NZ_CP011454.1	2048825	2049772	-	CDS	GEMMAAP_RS08515	WP_158514786.1	zinc dependent phospholipase C family protein	6.21132	0.419616	0.226764	-0.0272533	-0.0128704	-0.324622	-0.106434	0.0520316	0.402608	0.982528	0.99968	0.0783936	0.787607
NZ_CP011454.1	1649639	1651009	+	CDS	GEMMAAP_RS06845	WP_026850368.1	SpoIID/LytB domain-containing protein	7.52112	-0.0317319	0.165524	-0.0268914	-0.0771703	0.263353	0.189712	0.90779	0.458663	0.97401	0.99968	0.103937	0.535578
NZ_CP011454.1	2595010	2595345	+	CDS	GEMMAAP_RS11030	WP_158514825.1	BlaI/MecI/CopY family transcriptional regulator	2.57144	0.15585	0.165935	-0.0268908	0.0705852	-0.191264	0.383789	0.731626	0.81553	0.999272	0.99968	0.518333	0.445944
NZ_CP011454.1	1983524	1985761	+	CDS	GEMMAAP_RS08215	WP_158514780.1	PAS domain S-box protein	6.14874	0.492464	0.360763	-0.0268159	0.0339679	0.275312	0.214512	0.0226047	0.150602	0.98388	0.99968	0.129942	0.535208
NZ_CP011454.1	1296661	1297593	+	CDS	GEMMAAP_RS05440	WP_026849917.1	histone deacetylase	4.86649	0.217872	0.039812	-0.0265395	-0.122751	0.147271	-0.0478978	0.415001	0.946621	0.989685	0.99968	0.544635	0.947185
NZ_CP011454.1	1740259	1740582	+	CDS	GEMMAAP_RS07230	WP_026850430.1	thioredoxin	7.27816	-0.302139	-0.316632	-0.0264229	-0.129896	-0.151903	-0.263284	0.0721774	0.09577	0.973029	0.99968	0.317682	0.296215
NZ_CP011454.1	1331809	1332327	-	CDS	GEMMAAP_RS05570	WP_053334222.1	TetR/AcrR family transcriptional regulator	5.18616	-0.0636776	-0.195967	-0.0262882	-0.14587	-0.716025	0.179503	0.846782	0.58588	0.994205	0.99968	0.00126082	0.662173
NZ_CP011454.1	2672674	2673531	+	CDS	GEMMAAP_RS11400	WP_082821255.1	ABC transporter permease	5.73592	0.155101	0.320663	-0.0260843	-0.0989473	0.655772	0.0947717	0.350283	0.0941341	0.973029	0.99968	4.60098e-05	0.744445
NZ_CP011454.1	2417341	2418885	+	CDS	GEMMAAP_RS10270	WP_043581624.1	hypothetical protein	4.80919	0.0825037	-0.0469364	-0.0259509	0.129599	-0.580581	0.123252	0.814949	0.940013	0.994205	0.99968	0.0091602	0.792164
NZ_CP011454.1	2785765	2785926	+	CDS	GEMMAAP_RS20575	WP_158514839.1	hypothetical protein	6.7854	-0.266182	-0.231141	-0.0257438	0.283969	0.379385	0.715008	0.469004	0.623617	0.995456	0.99968	0.199497	0.126349
NZ_CP011454.1	487455	487901	-	CDS	GEMMAAP_RS02110	WP_075071389.1	DUF1569 domain-containing protein	3.27385	0.202629	-0.0336096	-0.0256656	0.19392	-0.00783321	-0.0206961	0.601795	0.968768	0.994205	0.99968	0.995622	0.98831
NZ_CP011454.1	435764	438193	+	CDS	GEMMAAP_RS01940	WP_026849210.1	serine/threonine protein kinase	6.18418	0.17979	0.435153	-0.0255726	-0.03737	0.713332	0.219136	0.320847	0.0410308	0.97401	0.99968	5.50368e-05	0.419505
NZ_CP011454.1	2000844	2002193	+	CDS	GEMMAAP_RS08295	WP_026850591.1	hypothetical protein	7.66633	0.211306	0.102959	-0.0255486	0.00394893	-0.13247	0.0283007	0.226465	0.662498	0.97401	0.99968	0.405885	0.952289
NZ_CP011454.1	406395	407510	-	CDS	GEMMAAP_RS01830	WP_053333935.1	serine hydrolase	5.49119	-0.463584	-0.567116	-0.0250911	0.0366503	0.208695	-0.300564	0.207174	0.219123	0.996624	0.99968	0.525128	0.638386
NZ_CP011454.1	623099	625762	+	CDS	GEMMAAP_RS02755	WP_158514701.1	PIG-L family deacetylase	7.57793	-0.0235666	0.129586	-0.0249969	-0.0802605	0.515403	0.0970512	0.99758	0.475392	0.973029	0.99968	0.000382671	0.718796
NZ_CP011454.1	2507078	2508316	-	CDS	GEMMAAP_RS10695	WP_053334161.1	aminotransferase class III-fold pyridoxal phosphate-dependent enzyme	6.08219	0.414486	0.356304	-0.0248403	-0.01421	-0.344393	0.159436	0.112338	0.251796	0.99417	0.99968	0.11684	0.724273
NZ_CP011454.1	1387310	1389280	+	CDS	GEMMAAP_RS05765	WP_053334211.1	hypothetical protein	7.83332	-0.850388	-0.988835	-0.0247174	-0.240211	-0.0231273	-0.674368	0.00660002	0.00934843	0.994205	0.99968	0.945047	0.104185
NZ_CP011454.1	1779620	1781113	-	CDS	GEMMAAP_RS07390	WP_026850453.1	carboxypeptidase regulatory-like domain-containing protein	6.94708	0.0577028	0.329626	-0.0245958	0.151356	-0.72814	0.0222766	0.767199	0.0723094	0.973029	0.99968	1.59612e-05	0.959886
NZ_CP011454.1	202257	203267	+	CDS	GEMMAAP_RS00890	WP_145978931.1	hypothetical protein	5.24913	-0.0901315	-0.0825636	-0.0245093	0.0343462	0.44941	0.199604	0.7205	0.822422	0.986144	0.99968	0.0110662	0.558572
NZ_CP011454.1	1154328	1156262	-	CDS	GEMMAAP_RS04760	WP_158514736.1	DbpA RNA binding domain-containing protein	7.54688	-0.27236	-0.192672	-0.0242324	-0.225909	0.198302	0.000933516	0.183257	0.431694	0.985391	0.99968	0.277027	0.999165
NZ_CP011454.1	2059304	2060236	+	CDS	GEMMAAP_RS08565	WP_053334440.1	bifunctional riboflavin kinase/FAD synthetase	5.19069	0.130996	0.348079	-0.0240962	0.0642787	0.832453	-0.0991821	0.579737	0.161615	0.986616	0.99968	0.000193418	0.840227
NZ_CP011454.1	2103642	2104106	+	CDS	GEMMAAP_RS08790	WP_026850847.1	23S rRNA (pseudouridine(1915)-N(3))-methyltransferase RlmH	6.33344	0.0717714	0.271015	-0.0239072	0.0667783	0.275673	-0.166674	0.73598	0.188274	0.979082	0.99968	0.0778507	0.595002
NZ_CP011454.1	379875	380072	+	CDS	GEMMAAP_RS01675	WP_026849171.1	hypothetical protein	4.64408	0.301561	-0.122606	-0.0236345	0.116917	0.0825241	-0.0103835	0.213719	0.865047	0.994205	0.99968	0.732839	0.994981
NZ_CP011454.1	1914693	1915622	+	CDS	GEMMAAP_RS07915	WP_026850528.1	signal recognition particle-docking protein FtsY	5.83868	-0.156442	-0.0773511	-0.023483	-0.127416	0.0197496	-0.103782	0.392274	0.784512	0.979478	0.99968	0.916533	0.744315
NZ_CP011454.1	2387089	2388093	-	CDS	GEMMAAP_RS10150	WP_026850656.1	polyprenyl synthetase family protein	7.72262	0.114435	-0.124405	-0.0234801	0.14486	0.0899675	0.166194	0.503142	0.659049	0.97401	0.99968	0.547155	0.526485
NZ_CP011454.1	2104155	2105789	+	CDS	GEMMAAP_RS08795	WP_158514790.1	bacillithiol biosynthesis BshC	7.51802	0.0606778	0.0988256	-0.0234129	-0.0241992	0.209346	-0.104826	0.722343	0.589372	0.973029	0.99968	0.0958703	0.679037
NZ_CP011454.1	4417854	4419059	-	CDS	GEMMAAP_RS18620	WP_026850930.1	RagB/SusD family nutrient uptake outer membrane protein	7.15991	0.0831529	-0.0318256	-0.023312	0.0472728	0.402949	-0.240862	0.795854	0.953916	0.994205	0.99968	0.0695479	0.581304
NZ_CP011454.1	972567	973403	-	CDS	GEMMAAP_RS04055	WP_026850141.1	AAA family ATPase	5.85117	0.166318	0.298054	-0.0232893	0.195433	-0.0409742	0.212108	0.433747	0.219206	0.986476	0.99968	0.844698	0.507979
NZ_CP011454.1	2409274	2409981	-	CDS	GEMMAAP_RS10240	WP_053334462.1	tRNA (adenosine(37)-N6)-threonylcarbamoyltransferase complex dimerization subunit type 1 TsaB	6.85844	-0.183598	-0.0834895	-0.0227357	-0.132964	-0.368813	0.104251	0.365806	0.783765	0.986205	0.99968	0.0291742	0.766457
NZ_CP011454.1	1929268	1931604	+	CDS	GEMMAAP_RS07970	WP_026850537.1	DNA internalization-related competence protein ComEC/Rec2	5.40157	0.282886	0.023735	-0.022305	-0.203028	0.476524	-0.0494108	0.358629	0.971947	0.994499	0.99968	0.0767469	0.954928
NZ_CP011454.1	151	1569	+	CDS	GEMMAAP_RS00010	WP_026848931.1	chromosomal replication initiator protein DnaA	6.1574	0.192405	0.230055	-0.0221776	0.249002	-0.135914	0.16087	0.427598	0.431694	0.994205	0.99968	0.523024	0.691648
NZ_CP011454.1	1911355	1912626	+	CDS	GEMMAAP_RS07905	WP_053334411.1	M23 family metallopeptidase	8.8543	0.13344	-0.10974	-0.0219251	0.113989	0.538464	0.113534	0.582686	0.716854	0.988719	0.99968	0.00625006	0.777172
NZ_CP011454.1	1595435	1596490	+	CDS	GEMMAAP_RS06635	WP_026850335.1	magnesium chelatase ATPase subunit I	6.33675	0.214436	0.116484	-0.0219194	0.162943	-0.0421804	-0.0144961	0.319603	0.70875	0.99417	0.99968	0.84742	0.987148
NZ_CP011454.1	1404343	1404840	+	CDS	GEMMAAP_RS05825	WP_026849855.1	paraquat-inducible protein A	6.08358	-0.900442	-0.958675	-0.0218386	0.0458204	-0.484385	0.087482	0.011897	0.0334519	0.998787	0.99968	0.0939687	0.908156
NZ_CP011454.1	4365202	4365885	+	CDS	GEMMAAP_RS18395	WP_158514925.1	1-acyl-sn-glycerol-3-phosphate acyltransferase	5.0811	-0.489309	-0.332141	-0.0215504	-0.293444	-0.602952	0.145222	0.0421157	0.276231	0.994205	0.99968	0.00326087	0.718796
NZ_CP011454.1	2101192	2102292	+	CDS	GEMMAAP_RS08780	WP_026850849.1	tetraacyldisaccharide 4'-kinase	6.15609	-0.160414	-0.338326	-0.0214849	-0.112913	0.231711	0.134101	0.517651	0.214942	0.994205	0.99968	0.24213	0.744315
NZ_CP011454.1	746943	748232	+	CDS	GEMMAAP_RS03230	WP_075071398.1	cytochrome c oxidase subunit II	9.2481	0.2876	0.0241612	-0.0214473	0.114141	-0.00221269	-0.0748226	0.148181	0.953916	0.986934	0.99968	0.992397	0.852441
NZ_CP011454.1	3283007	3283711	-	CDS	GEMMAAP_RS13915	WP_145979149.1	HupE/UreJ family protein	4.53179	0.0809057	-0.106243	-0.0213241	0.026726	0.220582	-0.342345	0.811782	0.820709	0.994205	0.99968	0.345503	0.427082
NZ_CP011454.1	3491210	3493168	-	CDS	GEMMAAP_RS14765	WP_053333697.1	polysaccharide biosynthesis protein	8.88041	-0.00632187	0.185498	-0.0210775	-0.199869	0.252164	-0.0359866	0.995923	0.712491	0.998563	0.99968	0.45307	0.978354
NZ_CP011454.1	2040229	2040774	+	CDS	GEMMAAP_RS08480	WP_026850618.1	hypothetical protein	6.34555	-0.552624	-0.701427	-0.0208904	0.0774165	-0.710747	-0.336162	0.0264697	0.0218668	0.994205	0.99968	0.00194287	0.374705
NZ_CP011454.1	4398692	4399678	-	CDS	GEMMAAP_RS18545	WP_026850919.1	D-glycerate dehydrogenase	6.19006	0.153283	0.228319	-0.0207509	-0.00258233	0.24426	-0.0328484	0.533487	0.415982	0.994205	0.99968	0.209109	0.957028
NZ_CP011454.1	2138597	2139532	-	CDS	GEMMAAP_RS08955	WP_053334539.1	site-specific tyrosine recombinase XerD	5.92113	0.142278	0.0720074	-0.02065	-0.0512776	0.191984	0.0594011	0.503142	0.830003	0.988719	0.99968	0.281789	0.898785
NZ_CP011454.1	273318	273920	+	CDS	GEMMAAP_RS01205	WP_026849103.1	hypothetical protein	7.8457	1.5399	0.510262	-0.0206477	-0.55731	0.794938	-0.173096	0.00735067	0.431069	0.999272	0.99968	0.0878183	0.875178
NZ_CP011454.1	885000	886277	-	CDS	GEMMAAP_RS03725	WP_026850191.1	VWA domain-containing protein	7.89562	-0.092351	-0.190902	-0.0205332	-0.0349073	0.0643967	-0.326362	0.68483	0.396656	0.988101	0.99968	0.744807	0.264983
NZ_CP011454.1	822174	823343	-	CDS	GEMMAAP_RS03500	WP_026850223.1	acyl-CoA dehydrogenase family protein	6.97435	-0.159908	0.0164045	-0.0204074	-0.0419539	-0.627814	0.0335098	0.370666	0.983807	0.986205	0.99968	0.000198545	0.935404
NZ_CP011454.1	1454884	1455666	-	CDS	GEMMAAP_RS06005	WP_026850237.1	enoyl-CoA hydratase/isomerase family protein	4.98254	-0.144001	-0.248822	-0.0204018	-0.00298831	-0.447592	0.135924	0.565688	0.402608	0.994205	0.99968	0.0174856	0.724273
NZ_CP011454.1	274563	275129	+	CDS	GEMMAAP_RS01215	WP_026849105.1	hypothetical protein	7.44005	0.920422	-0.268917	-0.0203901	-0.323905	0.989824	-0.327475	0.0224764	0.603775	0.999272	0.99968	0.00590784	0.634728
NZ_CP011454.1	1163122	1164318	+	CDS	GEMMAAP_RS04795	WP_026850026.1	DNA repair exonuclease	5.94774	-0.175732	0.0222509	-0.0203873	0.0907268	-0.138984	-0.200864	0.341119	0.956667	0.986836	0.99968	0.383957	0.482968
NZ_CP011454.1	626091	627761	-	CDS	GEMMAAP_RS02760	WP_026849330.1	sodium:solute symporter	7.04992	-0.091899	-0.0330577	-0.0203768	0.119261	-0.049396	0.0399245	0.720782	0.94144	0.994015	0.99968	0.825209	0.94117
NZ_CP011454.1	2726143	2726931	-	CDS	GEMMAAP_RS11615	WP_053334113.1	OmpA family protein	4.22636	-0.0762797	-0.0523882	-0.0202928	0.0292561	0.150686	0.027976	0.815439	0.976021	0.994205	0.99968	0.47897	0.970223
NZ_CP011454.1	4475219	4475974	+	CDS	GEMMAAP_RS18845	WP_053334600.1	sterol desaturase family protein	4.25654	0.137452	0.066725	-0.0202435	0.111811	0.350915	-0.010257	0.645068	0.901409	0.994205	0.99968	0.0901636	0.993659
NZ_CP011454.1	4658659	4659246	-	CDS	GEMMAAP_RS19605	WP_145979260.1	DinB family protein	4.25861	-0.0716024	-0.0933301	-0.0202003	0.0585841	-0.412294	0.316588	0.83312	0.919334	0.994205	0.99968	0.055098	0.397594
NZ_CP011454.1	2335204	2336229	-	CDS	GEMMAAP_RS09905	WP_026850691.1	phosphotransacetylase	6.84177	0.280505	0.247783	-0.0200262	-0.0295107	-0.0568673	-0.00610783	0.0509517	0.128577	0.978517	0.99968	0.686495	0.993659
[truncated: 2,093 more rows]
