# Supplementary material for: The Influence of Calcium on the Growth, Morphology and Gene Regulation in Gemmatimonas phototrophica
Source: Microorganisms. 2022 Dec 22;11(1):27. doi: 10.3390/microorganisms11010027 (PMC9862903; doi:10.3390/microorganisms11010027)
Supplement: Supplementary file 1 [file microorganisms-11-00027-s001.zip › Supplementary_Dataset_S2.xlsx]

## Sheet: result_table_CaCl2
replicon	start	end	strand	type	locus_tag	id	product	log_cpm	lfc_x2h_2mg_ca_cl2_x0h_2mg_ca_cl2	lfc_x2h_20mg_ca_cl2_x0h_2mg_ca_cl2	lfc_x2h_20mg_mg_cl2_x0h_2mg_ca_cl2	lfc_x8h_2mg_ca_cl2_x0h_2mg_ca_cl2	lfc_x8h_20mg_ca_cl2_x0h_2mg_ca_cl2	lfc_x8h_20mg_mg_cl2_x0h_2mg_ca_cl2	lfc_x24h_2mg_ca_cl2_x0h_2mg_ca_cl2	lfc_x24h_20mg_ca_cl2_x0h_2mg_ca_cl2	lfc_x24h_20mg_mg_cl2_x0h_2mg_ca_cl2	fdr_x2h_2mg_ca_cl2_x0h_2mg_ca_cl2	fdr_x2h_20mg_ca_cl2_x0h_2mg_ca_cl2	fdr_x2h_20mg_mg_cl2_x0h_2mg_ca_cl2	fdr_x8h_2mg_ca_cl2_x0h_2mg_ca_cl2	fdr_x8h_20mg_ca_cl2_x0h_2mg_ca_cl2	fdr_x8h_20mg_mg_cl2_x0h_2mg_ca_cl2	fdr_x24h_2mg_ca_cl2_x0h_2mg_ca_cl2	fdr_x24h_20mg_ca_cl2_x0h_2mg_ca_cl2	fdr_x24h_20mg_mg_cl2_x0h_2mg_ca_cl2
NZ_CP011454.1	4355220	4356638	-	CDS	GEMMAAP_RS18350	WP_158514924.1	TolC family protein	6.96436	6.71948	3.39008	3.57547	3.5619	4.3268	2.21571	6.15315	2.90518	3.95221	0.020161	0.415627	0.429471	0.275973	0.116244	0.476538	0.00189748	0.105704	0.0253724
NZ_CP011454.1	4350871	4353987	-	CDS	GEMMAAP_RS18340	WP_082821476.1	efflux RND transporter permease subunit	8.08402	5.03177	2.58084	3.06743	4.4146	3.15112	2.33467	4.01314	1.65822	1.88198	0.0518962	0.541733	0.441089	0.129353	0.215729	0.38399	0.0174243	0.298967	0.212025
NZ_CP011454.1	4353984	4355135	-	CDS	GEMMAAP_RS18345	WP_158514923.1	efflux RND transporter periplasmic adaptor subunit	6.55373	5.00915	2.78109	3.27002	4.03937	3.20025	2.2334	4.62802	2.11463	2.64715	0.0492947	0.520824	0.434737	0.179354	0.217016	0.430257	0.0078636	0.209499	0.100599
NZ_CP011454.1	1027600	1028964	+	CDS	GEMMAAP_RS04280	WP_053334274.1	hypothetical protein	8.55754	4.27626	-1.63723	0.974002	1.63649	3.74007	-0.145588	5.8444	0.448248	3.40655	0.00710987	0.512583	0.749549	0.307294	0.009974	0.956384	1.03e-05	0.642005	0.000968374
NZ_CP011454.1	3217713	3218009	-	CDS	GEMMAAP_RS13615	WP_026848752.1	hypothetical protein	4.90647	4.24438	1.8105	2.35257	1.24208	2.3406	0.830952	2.82406	1.0908	1.91216	0.0304798	0.64064	0.51547	0.656619	0.252844	0.770936	0.02665	0.430735	0.138328
NZ_CP011454.1	3075601	3075912	+	CDS	GEMMAAP_RS13050	WP_026849426.1	nitrogen regulatory protein P-II	3.00796	3.70647	0.319315	0.0821097	0.513668	0.91408	0.637257	2.98719	0.578372	1.79436	0.000778605	0.931656	0.999712	0.75313	0.419314	0.638971	2.78e-05	0.429888	0.00794017
NZ_CP011454.1	1385767	1386210	-	CDS	GEMMAAP_RS05755	WP_026849866.1	hypothetical protein	7.10098	3.50435	4.00618	2.69098	2.0785	2.59105	1.31909	5.11224	4.56356	3.77427	7.1e-06	6.98e-07	0.000454974	0.00605768	5.93e-05	0.0573192	2.33e-10	2.2e-09	8.45e-09
NZ_CP011454.1	3074588	3075580	+	CDS	GEMMAAP_RS13045	WP_026849427.1	sodium-dependent bicarbonate transport family permease	4.28754	3.49649	-0.0920689	-0.239593	0.566776	0.7946	-0.157692	3.29001	1.05609	1.98537	0.00135494	0.97435	0.990171	0.679334	0.459534	0.938085	1.03e-05	0.104412	0.00247595
NZ_CP011454.1	1045340	1046137	+	CDS	GEMMAAP_RS04345	WP_043581079.1	glycosyltransferase family 2 protein	9.34433	3.08379	5.08079	3.5206	3.34563	3.11665	2.44627	5.92383	6.61151	5.98153	0.00135494	1.24e-06	0.000454974	0.00212345	0.00034218	0.0189746	7.11e-09	5.17e-09	5.59e-09
NZ_CP011454.1	426951	428195	+	CDS	GEMMAAP_RS01895	WP_053333941.1	serpin family protein	9.80064	2.97647	5.08886	3.50534	3.40422	3.40001	2.5098	5.57218	6.5243	5.34104	0.001408	1.24e-06	0.000454974	0.00212345	0.000122048	0.0189746	1.08e-08	5.13e-09	1.49e-08
NZ_CP011454.1	4068020	4068415	-	CDS	GEMMAAP_RS17150	WP_026848233.1	hypothetical protein	4.34751	2.92308	-0.181723	-0.0567588	1.57714	0.581883	0.882258	2.26819	-0.254533	2.00881	0.00723032	0.955935	0.999712	0.185468	0.656112	0.473601	0.00151905	0.75445	0.00442551
NZ_CP011454.1	1371232	1371783	-	CDS	GEMMAAP_RS05685	WP_026849879.1	hypothetical protein	5.78661	2.69598	-0.9402	0.467814	0.907727	-0.199426	0.669601	4.32933	0.470238	2.82952	0.0168695	0.740809	0.931052	0.5308	0.92668	0.639464	5.55e-06	0.556724	0.000463838
NZ_CP011454.1	1386276	1386959	-	CDS	GEMMAAP_RS05760	WP_026849865.1	hypothetical protein	7.65117	2.66358	-0.85463	0.439112	0.257263	0.042299	0.391546	4.44824	1.17946	3.33566	0.0770702	0.83508	0.96086	0.920255	0.996694	0.867175	0.000271767	0.239351	0.00232273
NZ_CP011454.1	83881	85128	-	CDS	GEMMAAP_RS00355	WP_026848983.1	NAD(P)/FAD-dependent oxidoreductase	5.05525	2.63839	-0.849416	0.369097	0.89684	0.797752	0.551451	3.87708	0.244999	2.06835	0.0139799	0.760004	0.964366	0.519513	0.511769	0.698801	9.26e-06	0.761596	0.00455636
NZ_CP011454.1	4356733	4357386	-	CDS	GEMMAAP_RS18355	WP_053334571.1	TetR/AcrR family transcriptional regulator	7.00677	2.63593	0.322465	0.206998	-0.0326371	0.804865	-0.180788	1.59932	0.320794	0.879348	0.0155238	0.92505	0.985589	0.991951	0.481655	0.921812	0.02065	0.662727	0.183315
NZ_CP011454.1	2487978	2489102	-	CDS	GEMMAAP_RS10615	WP_026849787.1	PAS domain S-box protein	6.97164	2.63033	-1.12041	0.520461	1.25858	0.182739	0.774972	3.82585	0.0457519	2.54778	0.025883	0.64064	0.902521	0.352062	0.934276	0.58868	7.04e-05	0.962008	0.00222401
NZ_CP011454.1	4549370	4550971	+	CDS	GEMMAAP_RS19165	WP_026851009.1	magnesium-protoporphyrin IX monomethyl ester anaerobic oxidative cyclase	5.32934	2.59417	-0.41478	0.559452	0.505339	1.63903	-0.146358	4.16735	0.121874	2.10427	0.00366742	0.873747	0.842997	0.669306	0.0526926	0.931167	1.65e-07	0.854273	0.000535713
NZ_CP011454.1	4646557	4647120	+	CDS	GEMMAAP_RS19545	WP_053333824.1	RNA polymerase sigma factor	9.79086	2.59095	4.29727	3.01186	2.64572	2.35539	1.73596	5.79225	6.29566	5.86908	0.00283826	4.2e-06	0.00095137	0.00605768	0.00242108	0.0509237	4.62e-09	4.6e-09	3.42e-09
NZ_CP011454.1	4049621	4050460	-	CDS	GEMMAAP_RS17075	WP_053333581.1	hypothetical protein	6.14667	2.58157	-0.596844	0.934619	0.718556	0.349088	0.510277	4.85015	1.31369	3.45912	0.00744452	0.827637	0.652637	0.553749	0.77721	0.671524	1.23e-07	0.0360458	6.01e-06
NZ_CP011454.1	3933110	3937579	-	CDS	GEMMAAP_RS16625	WP_053333601.1	2-oxoacid:acceptor oxidoreductase family protein	8.55129	2.54493	-1.37446	0.15633	1.0796	1.38005	0.470145	3.88749	0.347015	2.35483	0.0628763	0.595262	0.993197	0.502048	0.34837	0.804066	0.000368422	0.718353	0.0116102
NZ_CP011454.1	3075925	3076839	+	CDS	GEMMAAP_RS13055	WP_026849425.1	LysR family transcriptional regulator	3.77801	2.54018	-0.0139823	0.0667304	0.259577	0.381033	0.461884	1.89849	0.528065	1.46478	0.00135494	0.999855	0.999712	0.824138	0.67941	0.624726	0.000195783	0.292512	0.0031021
NZ_CP011454.1	4369293	4371518	+	CDS	GEMMAAP_RS18415	WP_202969231.1	cytochrome-c oxidase%2C cbb3-type subunit I	8.44388	2.4841	-1.33604	-0.147525	0.866682	0.716874	0.32499	3.72532	1.0389	2.45794	0.0226432	0.426947	0.992231	0.492013	0.552005	0.832303	4.11e-05	0.144735	0.00149124
NZ_CP011454.1	3471591	3472511	-	CDS	GEMMAAP_RS14690	WP_082821364.1	prohibitin family protein	3.76504	2.4805	-0.23644	-0.137204	0.938671	0.314189	0.132808	2.08571	-0.165528	1.44473	0.00187289	0.931656	0.992231	0.299938	0.74956	0.927651	0.000100972	0.775764	0.00436614
NZ_CP011454.1	2551699	2552637	-	CDS	GEMMAAP_RS10850	WP_053334152.1	hypothetical protein	6.94473	2.45576	-0.460608	0.041959	0.413951	1.17363	-0.278328	3.49359	-0.446446	1.72195	0.00211338	0.791958	0.999712	0.66065	0.106246	0.786643	4.04e-07	0.368241	0.000839021
NZ_CP011454.1	1026922	1027539	+	CDS	GEMMAAP_RS04275	WP_026850103.1	YceI family protein	8.52901	2.40879	-1.22215	0.111933	1.41685	-0.0982894	0.545892	3.90574	1.26815	3.00696	0.159176	0.755688	0.999712	0.482646	0.985467	0.822291	0.00269767	0.271071	0.0122835
NZ_CP011454.1	2597997	2598164	+	CDS	GEMMAAP_RS20565	WP_158514826.1	hypothetical protein	5.47827	2.39143	0.0963451	-0.223782	-0.294533	0.414007	-0.41164	2.05707	1.51321	0.762164	0.00661942	0.965706	0.980559	0.824138	0.687388	0.717179	0.000523533	0.00835762	0.157378
NZ_CP011454.1	3470339	3471520	-	CDS	GEMMAAP_RS14685	WP_026848589.1	hypothetical protein	3.33796	2.33284	-0.170503	0.0796786	1.43022	0.361959	0.695351	2.08875	-0.0348316	1.54924	0.00941785	0.951553	0.999712	0.171679	0.764712	0.517985	0.000581323	0.963866	0.00913467
NZ_CP011454.1	4067436	4068023	-	CDS	GEMMAAP_RS17145	WP_026848234.1	OmpH family outer membrane protein	4.20153	2.21651	-0.0434832	0.0551684	1.79828	0.0140191	1.21341	2.44113	-0.169713	2.23999	0.0989316	0.999579	0.999712	0.252277	0.999236	0.442781	0.00667041	0.876682	0.0125044
NZ_CP011454.1	4389345	4390610	+	CDS	GEMMAAP_RS18500	WP_082821482.1	FecR domain-containing protein	7.72921	2.19505	-0.952698	0.152087	0.58985	0.391252	0.236206	3.96899	0.761297	2.55196	0.00723032	0.434583	0.985589	0.530208	0.674973	0.82962	2.46e-07	0.136075	3.28e-05
NZ_CP011454.1	4647113	4647826	+	CDS	GEMMAAP_RS19550	WP_053333825.1	isoamylase early set domain-containing protein	8.86593	2.19213	4.13899	2.73215	2.14722	2.17207	1.67204	5.09646	5.67141	5.00107	0.00283826	1.11e-06	0.000509313	0.00723224	0.00112665	0.0327601	1.84e-09	1.49e-09	1.81e-09
NZ_CP011454.1	3923588	3925042	+	CDS	GEMMAAP_RS16575	WP_026848312.1	nitronate monooxygenase	7.6761	2.13726	-1.22068	-0.185656	0.811646	0.584555	0.129501	3.48757	0.566255	2.02602	0.0222	0.394377	0.985589	0.460071	0.58245	0.940671	1.33e-05	0.362568	0.00195257
NZ_CP011454.1	3958118	3958603	-	CDS	GEMMAAP_RS16705	WP_026848296.1	DUF6174 domain-containing protein	9.66345	2.06403	4.15917	3.05877	2.49008	2.30884	1.56998	5.77289	6.50432	5.93797	0.020161	4.03e-05	0.0030111	0.0190905	0.00850496	0.0991531	2.49e-08	1.61e-08	1.58e-08
NZ_CP011454.1	4647828	4648484	+	CDS	GEMMAAP_RS19555	WP_026848877.1	hypothetical protein	8.28806	2.03902	4.16964	2.80161	2.20309	2.08408	1.53652	4.65832	5.5296	4.42956	0.00447203	1.11e-06	0.000454974	0.00700845	0.00145069	0.048814	4.39e-09	1.69e-09	6.86e-09
NZ_CP011454.1	4648577	4649263	+	CDS	GEMMAAP_RS19560	WP_053333826.1	pentapeptide repeat-containing protein	8.11193	1.92652	4.1471	2.6267	2.37603	2.20133	1.68148	3.7089	4.99572	3.58606	0.00840063	1.24e-06	0.00104886	0.00605768	0.00141516	0.0403703	1.23e-07	8.82e-09	1.57e-07
NZ_CP011454.1	2552718	2553206	-	CDS	GEMMAAP_RS10855	WP_026849751.1	Rrf2 family transcriptional regulator	7.89862	1.92287	-0.896361	-0.10267	0.788983	0.510099	0.227408	3.06005	0.431517	1.97465	0.0246655	0.569171	0.993197	0.430259	0.615191	0.865087	2.25e-05	0.458014	0.0013263
NZ_CP011454.1	272022	273308	+	CDS	GEMMAAP_RS01200	WP_043580111.1	FAD-dependent oxidoreductase	9.75811	1.83993	3.42477	2.37308	1.90949	1.66033	1.22137	5.247	5.75704	5.39853	0.0199687	7.22e-05	0.0121704	0.0397571	0.0347811	0.13515	1.38e-08	1.12e-08	8.6e-09
NZ_CP011454.1	4564998	4566302	+	CDS	GEMMAAP_RS19220	WP_026851020.1	DUF4010 domain-containing protein	6.46234	1.81587	-0.196396	0.165946	0.669674	-0.0614948	0.272855	3.23095	0.714026	2.15495	0.00135494	0.897387	0.952842	0.259203	0.951275	0.675374	4.39e-09	0.0375898	8.76e-07
NZ_CP011454.1	83529	83837	-	CDS	GEMMAAP_RS00350	WP_026848982.1	TusE/DsrC/DsvC family sulfur relay protein	2.56067	1.79959	-0.603875	0.538674	-0.202018	2.3985	-0.225197	3.59211	-0.575333	-0.0626719	0.178744	0.906957	0.962558	0.95744	0.0604741	0.940509	7.17e-05	0.613407	0.955443
NZ_CP011454.1	1755249	1755752	+	CDS	GEMMAAP_RS07285	WP_026850437.1	DNA starvation/stationary phase protection protein Dps	5.70497	1.79202	-0.797894	0.366473	0.468054	0.266485	0.329554	3.54837	1.06337	2.5777	0.00843136	0.520821	0.874425	0.605918	0.756752	0.705737	4.53e-08	0.0184404	2.73e-06
NZ_CP011454.1	3379577	3382282	+	CDS	GEMMAAP_RS14340	WP_053333718.1	cation-transporting P-type ATPase	5.49676	1.72759	-0.159068	0.312833	0.282003	1.48776	0.107858	3.43358	0.159865	1.77156	0.0092836	0.941504	0.910928	0.767367	0.0178741	0.930759	4.86e-08	0.737078	0.000195081
NZ_CP011454.1	3925077	3925637	-	CDS	GEMMAAP_RS16580	WP_202969155.1	fasciclin domain-containing protein	1.25053	1.69846	0.775943	1.08099	0.744644	1.78348	1.39615	4.20783	4.00404	4.21387	0.281254	0.864314	0.854737	0.765019	0.226816	0.41174	6.8e-07	4.59e-06	1.37e-06
NZ_CP011454.1	4049100	4049612	-	CDS	GEMMAAP_RS17070	WP_026848244.1	GNAT family N-acetyltransferase	5.22025	1.69555	-0.042337	0.122449	0.0774067	-0.0421	-0.116922	3.40231	0.855369	1.81905	0.00211338	0.980068	0.985589	0.944118	0.977288	0.899243	1.24e-09	0.0161079	8.58e-06
NZ_CP011454.1	2487183	2487968	-	CDS	GEMMAAP_RS10610	WP_075071488.1	response regulator	4.13665	1.69308	-0.417127	0.386958	0.257276	0.880867	0.149174	2.7089	-0.351131	0.766321	0.0108401	0.829225	0.874425	0.80332	0.200631	0.89937	8.66e-07	0.469409	0.083039
NZ_CP011454.1	1046161	1046661	+	CDS	GEMMAAP_RS04350	WP_145978995.1	hypothetical protein	7.6537	1.67892	3.98473	2.37713	2.23597	2.21662	1.59492	3.91144	4.84595	3.72802	0.0092836	7.69e-07	0.00095137	0.00386185	0.000416136	0.0301904	1.01e-08	2.02e-09	1.59e-08
NZ_CP011454.1	4371518	4371712	+	CDS	GEMMAAP_RS18420	WP_026850900.1	cbb3-type cytochrome c oxidase subunit 3	3.7352	1.67245	-1.50675	-0.457849	-2.36835	1.74097	-1.48697	3.41869	0.343214	-0.207177	0.214398	0.666743	0.978552	0.344944	0.206564	0.437911	0.000338132	0.734412	0.845776
NZ_CP011454.1	3307337	3308653	+	CDS	GEMMAAP_RS14030	WP_026848689.1	hypothetical protein	7.16396	1.66486	-0.737673	-0.122534	0.140299	-0.157261	-0.296567	2.29301	0.0185298	1.0938	0.00447203	0.380035	0.981429	0.872639	0.836173	0.67318	1.73e-06	0.966513	0.00364748
NZ_CP011454.1	4415103	4415642	+	CDS	GEMMAAP_RS18610	WP_026850928.1	DinB family protein	7.26664	1.65304	3.97031	2.54979	1.64846	1.59993	0.90454	4.67246	6.02368	4.05062	0.0816974	9.77e-05	0.0429854	0.146448	0.0966017	0.403214	3.61e-07	4.68e-08	1.67e-06
NZ_CP011454.1	4349115	4350122	-	CDS	GEMMAAP_RS18330	WP_053334633.1	glycerophosphodiester phosphodiesterase	3.2929	1.6191	0.444541	0.863256	0.941915	0.737057	0.54268	0.814396	-0.0866808	0.50325	0.0543258	0.859272	0.647797	0.36783	0.427224	0.610907	0.125601	0.897923	0.377763
NZ_CP011454.1	1345649	1346899	+	CDS	GEMMAAP_RS05625	WP_158514748.1	alpha/beta fold hydrolase	4.80508	1.60225	-0.00905185	0.382488	0.773893	0.279798	0.224954	3.25746	0.763174	1.95875	0.00303716	0.999855	0.798027	0.204275	0.668892	0.756112	1.07e-09	0.0291923	2.11e-06
NZ_CP011454.1	3504299	3504448	-	CDS	GEMMAAP_RS20630	WP_158514879.1	hypothetical protein	6.09392	1.60104	-0.909082	-0.03752	0.637318	-0.140718	-0.0184583	2.20458	-0.215041	0.899255	0.0535119	0.569171	0.999712	0.546344	0.927621	0.996617	0.000382142	0.72673	0.0979357
NZ_CP011454.1	4379087	4380379	-	CDS	GEMMAAP_RS18465	WP_158514926.1	universal stress protein	7.52588	1.58395	-0.178123	0.203768	0.465834	0.542629	0.317706	3.32427	0.621518	1.98534	0.00426426	0.91699	0.919308	0.459578	0.332881	0.625829	7e-09	0.0765807	4.51e-06
NZ_CP011454.1	3348668	3349786	+	CDS	GEMMAAP_RS14215	WP_053333725.1	BamA/TamA family outer membrane protein	4.15877	1.57322	-0.244083	0.273786	0.246006	0.0203472	0.154394	2.83135	0.404529	1.81838	0.0110266	0.903163	0.927238	0.795917	0.996447	0.884941	1.24e-07	0.345485	6.63e-05
NZ_CP011454.1	338628	339611	-	CDS	GEMMAAP_RS01495	WP_026849146.1	Ig-like domain-containing protein	10.0348	1.55069	2.79395	1.82559	1.19914	1.01944	0.446298	4.60976	5.11564	4.54251	0.035712	0.000429967	0.0624875	0.158456	0.187618	0.631245	3.46e-08	2.38e-08	3.67e-08
NZ_CP011454.1	4414350	4415081	+	CDS	GEMMAAP_RS18605	WP_026850927.1	PorT family protein	8.9092	1.54781	3.40158	2.79175	2.26794	1.73107	1.22723	5.42909	6.33202	5.44862	0.112432	0.00132645	0.0278511	0.0588207	0.0864851	0.235344	2.29e-07	9.68e-08	1.91e-07
NZ_CP011454.1	2490687	2491451	+	CDS	GEMMAAP_RS10630	WP_026849786.1	SDR family oxidoreductase	5.70751	1.52449	-0.968414	-0.0593686	1.06354	0.0606269	0.392313	3.24107	0.380787	2.16064	0.0454607	0.496539	0.999712	0.242049	0.977661	0.697047	1.56e-06	0.47726	0.000170106
NZ_CP011454.1	3128603	3129100	+	CDS	GEMMAAP_RS13255	WP_026848809.1	hypothetical protein	1.36957	1.51895	0.651947	-0.390616	0.163085	0.806443	0.391053	1.91674	1.5602	1.15007	0.05807	0.73864	0.959808	0.922367	0.377237	0.746863	0.000203148	0.00353211	0.0365198
NZ_CP011454.1	4627241	4627819	+	CDS	GEMMAAP_RS19455	WP_053333820.1	hypothetical protein	5.04832	1.48779	-0.597836	0.309841	-0.0389323	0.356295	0.206045	2.53945	0.659352	1.60188	0.0426202	0.73864	0.927238	0.985588	0.702736	0.863847	1.59e-05	0.190282	0.00201021
NZ_CP011454.1	4066763	4067167	-	CDS	GEMMAAP_RS20675	WP_158514912.1	MGMT family protein	2.74971	1.47312	-0.156633	0.53879	1.398	0.173236	0.903882	2.27556	0.581142	2.31839	0.223906	0.965706	0.933522	0.321087	0.945536	0.526499	0.00270446	0.489189	0.00280877
NZ_CP011454.1	3947700	3948227	+	CDS	GEMMAAP_RS16670	WP_026848302.1	PAS domain-containing protein	6.21105	1.40988	-0.552823	-0.265803	0.452152	0.842166	0.341089	2.15862	0.165751	1.30856	0.0999639	0.795942	0.964366	0.698198	0.365305	0.777388	0.000602162	0.795317	0.0221242
NZ_CP011454.1	3948248	3949489	+	CDS	GEMMAAP_RS16675	WP_053333597.1	methyl-accepting chemotaxis protein	6.85903	1.38137	-0.160711	0.554053	0.624181	1.58852	-0.243574	3.54513	3.16055	3.08914	0.048681	0.941504	0.739802	0.482086	0.0252508	0.813537	2.54e-07	1.84e-06	1.22e-06
NZ_CP011454.1	1384589	1385650	-	CDS	GEMMAAP_RS05750	WP_026849867.1	hypothetical protein	6.12972	1.36636	2.63078	1.11496	0.825309	1.05926	0.650948	2.18103	2.69293	1.50811	0.00836734	1.24e-06	0.126365	0.163196	0.0320491	0.220133	4.66e-07	5.43e-08	6.26e-05
NZ_CP011454.1	791084	792427	-	CDS	GEMMAAP_RS03370	WP_026849419.1	TolC family protein	6.65652	1.3627	0.0175757	0.630019	-0.368891	0.262884	-0.515092	0.928719	1.01876	0.971512	0.00840063	0.996776	0.480746	0.56961	0.66854	0.362865	0.00573637	0.00390202	0.00431316
NZ_CP011454.1	176390	177247	-	CDS	GEMMAAP_RS00790	WP_075071371.1	copper chaperone PCu(A)C	6.17838	1.35834	-0.662436	0.25484	0.62237	0.103833	0.247443	2.73876	0.462073	1.46127	0.00661942	0.37264	0.872733	0.262631	0.886751	0.68898	1.36e-08	0.149953	5.37e-05
NZ_CP011454.1	4568265	4569194	-	CDS	GEMMAAP_RS19235	WP_075071579.1	universal stress protein	9.72368	1.34834	-1.22007	-0.413652	0.796384	-0.0157136	0.0936612	2.54975	0.0711283	1.49433	0.161887	0.426947	0.894615	0.482784	0.999236	0.960753	0.000593413	0.925032	0.0221242
NZ_CP011454.1	1001869	1002045	-	CDS	GEMMAAP_RS20485	WP_158514727.1	hypothetical protein	9.39736	1.33404	1.19901	0.548952	0.19266	0.0955804	-0.123204	2.45729	2.56867	2.86642	0.0400852	0.143903	0.661674	0.840849	0.93854	0.916379	1.02e-05	1.05e-05	1.47e-06
NZ_CP011454.1	3131788	3132954	+	CDS	GEMMAAP_RS13270	WP_026848806.1	ABC transporter permease	0.418734	1.33105	0.376109	1.61067	0.549179	1.11024	0.882294	0.834773	0.964454	0.82062	0.174674	0.912067	0.361171	0.718283	0.270353	0.427277	0.161741	0.134121	0.22118
NZ_CP011454.1	3759839	3760495	-	CDS	GEMMAAP_RS15895	WP_026848422.1	TetR/AcrR family transcriptional regulator	6.9207	1.32421	0.543729	0.36356	0.194349	0.186518	0.0081413	0.67723	1.16017	0.765884	0.0105753	0.542715	0.749549	0.79313	0.777937	0.997094	0.0408977	0.00170085	0.0223787
NZ_CP011454.1	3132951	3133712	+	CDS	GEMMAAP_RS13275	WP_053333771.1	ABC transporter ATP-binding protein	0.395872	1.30964	0.667995	0.745476	0.771636	0.595201	1.16749	0.692406	0.710607	0.370526	0.224678	0.808558	0.849891	0.605753	0.656151	0.286866	0.285121	0.325113	0.644328
NZ_CP011454.1	273318	273920	+	CDS	GEMMAAP_RS01205	WP_026849103.1	hypothetical protein	7.8457	1.26487	2.80477	1.77513	1.36944	1.34879	0.81213	3.70937	4.50431	3.53628	0.0470239	6.27e-05	0.0327521	0.0728686	0.0386286	0.235344	4.51e-08	1.05e-08	7.25e-08
NZ_CP011454.1	2638615	2639535	+	CDS	GEMMAAP_RS11255	WP_026849694.1	NAD(P)H-binding protein	5.12552	1.24625	-0.547255	0.32381	0.23354	0.0111434	-0.05341	3.40722	0.283704	2.0621	0.0371652	0.691261	0.889337	0.803359	0.999236	0.966527	1.56e-08	0.504701	1.33e-05
NZ_CP011454.1	273920	274492	+	CDS	GEMMAAP_RS01210	WP_026849104.1	hypothetical protein	7.76995	1.20606	2.82887	1.60296	1.38034	1.31164	0.924414	3.01768	4.00204	2.8688	0.0222	1.96e-06	0.0121704	0.0287716	0.0119299	0.103571	2.59e-08	1.9e-09	4.51e-08
NZ_CP011454.1	2785555	2785719	+	CDS	GEMMAAP_RS20570	WP_158514838.1	hypothetical protein	6.38812	1.1953	0.85972	0.662263	0.163643	0.0948432	0.452011	2.34891	2.83253	3.2288	0.0092836	0.106184	0.406545	0.811415	0.89625	0.372442	3.17e-08	5.29e-09	3.41e-10
NZ_CP011454.1	2785765	2785926	+	CDS	GEMMAAP_RS20575	WP_158514839.1	hypothetical protein	6.7854	1.1915	0.925323	0.960364	0.217235	0.191491	0.501204	2.1293	2.50868	2.84431	0.00552199	0.0397399	0.0890995	0.697841	0.711428	0.252359	3.47e-08	8.02e-09	5.05e-10
NZ_CP011454.1	4545284	4546327	-	CDS	GEMMAAP_RS19150	WP_026851007.1	3-deoxy-7-phosphoheptulonate synthase	4.33434	1.17003	-0.110154	0.0399348	0.256284	0.136523	0.173021	1.70572	0.476936	0.894866	0.0535119	0.951553	0.999712	0.785111	0.885969	0.861938	0.000117679	0.254203	0.028074
NZ_CP011454.1	711132	713228	+	CDS	GEMMAAP_RS03065	WP_026849373.1	elongation factor G	8.25113	1.16565	-0.408164	0.112467	0.381648	1.62092	0.0955156	3.21837	1.78959	2.23505	0.0161664	0.696312	0.979251	0.520009	0.000654989	0.908731	2.53e-09	1.05e-05	2.85e-07
NZ_CP011454.1	789887	790918	-	CDS	GEMMAAP_RS03365	WP_026849418.1	HlyD family secretion protein	5.79189	1.16261	0.011095	0.771551	-0.351955	0.358501	-0.424785	-1.12825	-0.710608	-0.974036	0.0400852	0.999855	0.432666	0.654014	0.59482	0.535795	0.00482991	0.072729	0.0159639
NZ_CP011454.1	3905903	3907063	-	CDS	GEMMAAP_RS16505	WP_026848324.1	glycosyltransferase family 9 protein	6.98864	1.15983	0.80746	0.555742	0.462445	0.347344	0.319381	1.34662	0.812533	0.952111	0.0721847	0.426947	0.663258	0.582405	0.665139	0.705737	0.00294104	0.0655852	0.0266359
NZ_CP011454.1	149707	150144	+	CDS	GEMMAAP_RS00660	WP_026849021.1	hypothetical protein	7.57936	1.15953	-0.431593	-0.424623	-0.325411	-0.295715	-0.644107	1.52945	1.62916	1.40861	0.145385	0.848388	0.854248	0.775212	0.777911	0.495118	0.00591917	0.00502387	0.0100196
NZ_CP011454.1	4315373	4316440	-	CDS	GEMMAAP_RS18180	WP_082821472.1	integron integrase	5.2789	1.14323	-0.427713	0.0553869	-0.443083	-0.170401	-0.56472	-0.762693	-0.0427636	-1.45867	0.0226432	0.704858	0.999594	0.510092	0.805126	0.328935	0.0251797	0.914115	0.000326368
NZ_CP011454.1	4550961	4552325	+	CDS	GEMMAAP_RS19170	WP_053334623.1	oxygen-independent coproporphyrinogen III oxidase	3.37744	1.12493	-0.106881	0.115868	-0.552423	4.96096	-0.683435	3.00547	0.0151664	0.56799	0.509217	0.986214	0.999712	0.861655	0.000241814	0.793446	0.00132723	0.99134	0.607782
NZ_CP011454.1	3758247	3759842	-	CDS	GEMMAAP_RS15890	WP_026848423.1	TolC family protein	7.06007	1.11938	0.600699	0.637304	0.288075	0.277067	0.15763	0.52422	0.826039	0.35794	0.00941785	0.332216	0.34072	0.604618	0.570858	0.79348	0.0561594	0.00538226	0.187824
NZ_CP011454.1	3978985	3979638	-	CDS	GEMMAAP_RS16790	WP_026848286.1	hypothetical protein	0.724684	1.11933	-0.0230061	0.605954	1.35346	0.333697	-0.193668	0.815526	0.511396	0.499241	0.166122	0.999855	0.833372	0.140966	0.756752	0.89937	0.0922292	0.357053	0.379284
NZ_CP011454.1	4250635	4251189	-	CDS	GEMMAAP_RS17930	WP_026848120.1	hypothetical protein	1.88928	1.10041	0.366314	-0.57829	0.5294	0.399214	0.160578	-0.354851	-1.14249	-0.492032	0.0543258	0.810395	0.772246	0.490532	0.55904	0.867175	0.363613	0.0143362	0.261448
NZ_CP011454.1	175923	176393	-	CDS	GEMMAAP_RS00785	WP_053333888.1	copper chaperone PCu(A)C	4.36793	1.09979	-0.543726	0.267841	0.191441	0.846328	-0.195886	2.45085	0.418348	0.907108	0.00135494	0.244995	0.772246	0.66824	0.00430096	0.638772	1.36e-11	0.0517428	9.65e-05
NZ_CP011454.1	4322702	4323292	-	CDS	GEMMAAP_RS18220	WP_053334565.1	cupin domain-containing protein	2.5584	1.09625	0.205374	1.15296	1.00173	0.733405	0.31463	1.58919	1.00321	2.01311	0.114243	0.931656	0.341106	0.203543	0.316829	0.742054	0.00031584	0.0250723	2.65e-05
NZ_CP011454.1	407626	408315	-	CDS	GEMMAAP_RS01835	WP_026849195.1	hypothetical protein	8.19077	1.08952	-0.163455	-0.167413	0.178771	-0.0528807	-0.44708	1.95223	2.29656	2.39379	0.103163	0.941504	0.971133	0.867687	0.977271	0.592737	0.000154614	4.7e-05	1.66e-05
NZ_CP011454.1	83009	83491	-	CDS	GEMMAAP_RS00345	WP_026848981.1	DsrE/DsrF/DrsH-like family protein	3.17734	1.06853	-0.276316	-1.00297	-0.19022	2.29805	-0.226741	1.76359	-0.547893	-0.243178	0.265672	0.935062	0.747756	0.915699	0.00850496	0.890545	0.00361068	0.432896	0.731179
NZ_CP011454.1	4514601	4514807	-	CDS	GEMMAAP_RS19005	WP_026850986.1	hypothetical protein	1.9453	1.05563	0.0520187	0.944304	0.886931	0.637411	0.977971	1.54602	1.17893	1.84135	0.166122	0.986041	0.596936	0.339235	0.447615	0.210604	0.00101369	0.0160805	0.000263511
NZ_CP011454.1	3329563	3330783	+	CDS	GEMMAAP_RS14130	WP_026848674.1	DegT/DnrJ/EryC1/StrS aminotransferase family protein	8.15513	1.05363	-0.0436816	-0.352757	-0.455417	-0.168895	-0.380555	-0.183594	-0.0312651	-0.449839	0.147907	0.986631	0.87069	0.622563	0.877777	0.687084	0.706873	0.959288	0.341567
NZ_CP011454.1	3867448	3868158	-	CDS	GEMMAAP_RS16375	WP_145979192.1	hypothetical protein	2.72447	1.046	0.171866	0.132273	0.70256	0.18449	0.305532	1.36548	0.706266	1.21428	0.0672623	0.931656	0.991966	0.320134	0.820082	0.68898	0.000334753	0.0649798	0.00180296
NZ_CP011454.1	3130544	3131791	+	CDS	GEMMAAP_RS13265	WP_026848807.1	efflux RND transporter periplasmic adaptor subunit	1.32771	1.04361	0.176678	0.415846	0.978298	0.6352	0.575287	1.02426	0.70549	1.32448	0.185334	0.941504	0.916058	0.288608	0.46128	0.529266	0.0273007	0.170626	0.00841634
NZ_CP011454.1	3087376	3089166	-	CDS	GEMMAAP_RS13095	WP_026848833.1	acyl-CoA dehydrogenase C-terminal domain-containing protein	6.38274	1.04237	0.483613	0.823091	0.541145	0.425945	0.408239	0.907618	1.12982	0.994712	0.0187087	0.531075	0.19676	0.301837	0.369937	0.414883	0.00250296	0.000509669	0.00125277
NZ_CP011454.1	3859505	3860047	+	CDS	GEMMAAP_RS16335	WP_053333617.1	hypothetical protein	3.20575	1.03833	-0.268847	0.605147	0.254664	0.145187	0.189642	1.52376	-0.179477	0.374807	0.113191	0.895311	0.71799	0.802137	0.889008	0.859971	0.000549882	0.718353	0.402337
NZ_CP011454.1	4323289	4323750	-	CDS	GEMMAAP_RS18225	WP_043581756.1	hypothetical protein	2.47732	1.02648	0.00623909	0.831882	0.578438	0.447243	0.326332	1.46195	0.79538	2.19932	0.24898	0.999855	0.674108	0.623328	0.675805	0.794491	0.00541279	0.156664	0.000142533
NZ_CP011454.1	3227435	3228058	-	CDS	GEMMAAP_RS13665	WP_026848745.1	outer membrane beta-barrel protein	8.42022	1.01169	-0.621103	-0.508032	-0.420139	-0.668456	-0.738535	-0.616658	-1.15014	-1.57229	0.0854353	0.569171	0.657199	0.564111	0.298458	0.249894	0.111721	0.00678111	0.000390496
NZ_CP011454.1	3214789	3215358	-	CDS	GEMMAAP_RS13600	WP_026848754.1	hypothetical protein	8.56907	1.00476	-1.07191	-0.375294	-0.132082	-0.736988	-0.636839	-0.23517	-1.17427	-1.54392	0.141262	0.295323	0.83821	0.907651	0.327988	0.422612	0.606018	0.0160351	0.00189253
NZ_CP011454.1	261431	262309	-	CDS	GEMMAAP_RS01135	WP_026849089.1	ATP phosphoribosyltransferase	5.60625	0.98997	0.401033	0.495046	-0.222294	-0.00581353	0.291065	-0.501172	-1.278	-0.493192	0.001408	0.368499	0.307684	0.564837	0.999236	0.381775	0.0107741	1.05e-06	0.0146833
NZ_CP011454.1	3358827	3362120	+	CDS	GEMMAAP_RS20610	WP_026848654.1	hypothetical protein	1.11802	0.987394	0.0685677	-0.597965	0.134818	0.246434	0.125136	0.381819	0.0383803	0.537321	0.154526	0.971468	0.83523	0.92009	0.795969	0.925222	0.375026	0.947377	0.248494
NZ_CP011454.1	2710182	2711555	+	CDS	GEMMAAP_RS11550	WP_043580698.1	O-acetylhomoserine aminocarboxypropyltransferase/cysteine synthase	3.7252	0.977114	0.280402	-0.10585	-0.134111	0.10405	-0.00154969	-0.706636	-0.719536	-0.934639	0.0105147	0.74417	0.979752	0.824039	0.849497	0.999269	0.00641779	0.00870808	0.00137225
NZ_CP011454.1	3757081	3758250	-	CDS	GEMMAAP_RS15885	WP_053333640.1	efflux RND transporter periplasmic adaptor subunit	7.06745	0.976851	0.34533	0.636714	0.443994	0.364044	0.240599	-0.25192	0.230366	-0.392009	0.0121445	0.666743	0.286366	0.327034	0.390633	0.625339	0.317569	0.390329	0.122836
NZ_CP011454.1	4513363	4514475	-	CDS	GEMMAAP_RS19000	WP_202969167.1	NAD(P)-dependent alcohol dehydrogenase	6.42379	0.964654	-0.255113	-0.015115	-0.0161618	0.0781099	-0.192048	0.995861	0.933826	0.998161	0.101514	0.888148	0.999712	0.993304	0.945536	0.824423	0.0114178	0.021323	0.0117058
NZ_CP011454.1	1505817	1506071	+	CDS	GEMMAAP_RS06200	WP_026850270.1	GlsB/YeaQ/YmgE family stress response membrane protein	2.50212	0.964286	0.26163	-0.356153	0.343611	-0.00665389	-0.106886	0.264859	-0.35452	-0.145366	0.0846455	0.871495	0.881202	0.66065	0.999236	0.917934	0.461605	0.380452	0.72374
NZ_CP011454.1	152291	153232	-	CDS	GEMMAAP_RS19900	WP_026849025.1	MBL fold metallo-hydrolase	2.07394	0.956674	0.436166	1.1727	-0.0688909	-0.439608	0.143168	2.59476	2.73371	2.63469	0.439616	0.903534	0.657199	0.985329	0.804267	0.951849	0.0001578	0.000158705	0.000226526
NZ_CP011454.1	3753909	3757073	-	CDS	GEMMAAP_RS15880	WP_026848424.1	efflux RND transporter permease subunit	7.95576	0.949724	0.442015	0.506865	0.470723	0.369529	0.258778	-0.332243	0.0262182	-0.703909	0.0195674	0.538762	0.467816	0.308638	0.404544	0.612731	0.207479	0.935408	0.0103556
NZ_CP011454.1	3002017	3002547	+	CDS	GEMMAAP_RS20030	WP_082821295.1	hypothetical protein	7.34063	0.945709	0.378309	0.118234	-0.37456	-0.384638	-0.512747	-0.156271	-1.16912	-0.477129	0.0305124	0.691261	0.966864	0.495754	0.434478	0.293716	0.594559	0.000543133	0.0998773
NZ_CP011454.1	3127548	3128282	+	CDS	GEMMAAP_RS13250	WP_158514856.1	hypothetical protein	1.84287	0.912979	-0.259744	-0.234132	-0.558668	-0.0709924	-0.862378	2.19745	1.86695	1.88124	0.433738	0.941504	0.992231	0.767814	0.984556	0.58868	0.000660848	0.00518046	0.005049
NZ_CP011454.1	304352	304747	+	CDS	GEMMAAP_RS01360	WP_158514684.1	DUF3568 family protein	3.17303	0.901729	0.676853	0.793986	-0.121746	0.408754	-0.0431315	2.92587	3.45454	3.12878	0.431656	0.793584	0.811812	0.966331	0.775518	0.9942	3.46e-05	7.16e-06	1.89e-05
NZ_CP011454.1	3126517	3127158	-	CDS	GEMMAAP_RS13245	WP_202969135.1	response regulator transcription factor	3.71693	0.900671	0.291221	0.295232	0.232961	-0.0149694	0.045542	1.10686	1.39351	0.62641	0.0457969	0.798292	0.847642	0.729831	0.996447	0.961257	0.000387357	4.71e-05	0.0405054
NZ_CP011454.1	4215269	4216123	+	CDS	GEMMAAP_RS17765	WP_145979218.1	hypothetical protein	5.26909	0.898341	-0.54229	-0.220786	0.072812	0.160797	-0.10514	2.29284	2.55106	2.49326	0.227628	0.758824	0.972791	0.967256	0.885776	0.94083	3.52e-05	1.81e-05	1.38e-05
NZ_CP011454.1	1025950	1026744	+	CDS	GEMMAAP_RS04270	WP_026850104.1	DUF3108 domain-containing protein	7.76558	0.886932	-1.51246	-0.602863	0.8822	-1.02604	0.332608	1.91373	-0.124107	1.14282	0.465621	0.426947	0.85815	0.541151	0.434478	0.857345	0.0180461	0.889365	0.134235
NZ_CP011454.1	3529707	3530549	+	CDS	GEMMAAP_RS14900	WP_026848562.1	zinc metalloprotease HtpX	6.1289	0.86621	-0.00151082	-0.0199066	-0.0646368	0.173441	-0.412206	-1.50778	-1.65182	-2.117	0.047444	0.999855	0.999712	0.941009	0.765081	0.423609	2.6e-05	1.78e-05	7.02e-07
NZ_CP011454.1	645687	648671	+	CDS	GEMMAAP_RS02830	WP_158514702.1	SusC/RagA family TonB-linked outer membrane protein	6.25118	0.854616	0.0850938	0.529465	0.665137	0.027013	0.636712	2.31263	2.47991	1.93739	0.0552384	0.947784	0.543071	0.209571	0.985467	0.184283	5.09e-08	4.09e-08	6.08e-07
NZ_CP011454.1	274563	275129	+	CDS	GEMMAAP_RS01215	WP_026849105.1	hypothetical protein	7.44005	0.853199	1.77362	0.584282	0.404672	0.384282	0.0807675	1.85556	2.84538	1.52808	0.0619152	0.000177613	0.480746	0.480932	0.457417	0.925222	2.36e-06	1.77e-08	2.66e-05
NZ_CP011454.1	44193	44483	+	CDS	GEMMAAP_RS00185	WP_026848955.1	hypothetical protein	4.03361	0.84856	0.181815	0.0100571	0.376486	0.176286	-0.0493791	2.11131	1.57549	2.25216	0.0465289	0.893174	0.999712	0.505845	0.755871	0.953487	1.56e-08	3.26e-06	6.64e-09
NZ_CP011454.1	3299649	3299903	-	CDS	GEMMAAP_RS13985	WP_026848694.1	hypothetical protein	-0.00116077	0.841667	0.1445	1.48869	0.235141	0.329535	-1.18965	0.73533	0.584795	0.522682	0.50947	0.965706	0.510086	0.915699	0.841714	0.481941	0.272328	0.445905	0.512765
NZ_CP011454.1	788243	789874	-	CDS	GEMMAAP_RS03360	WP_145978976.1	DHA2 family efflux MFS transporter permease subunit	6.11325	0.839502	0.0865604	0.712784	-0.288143	0.318368	-0.348975	-1.83687	-1.09626	-1.46843	0.128642	0.958971	0.467816	0.70947	0.636897	0.618561	4.67e-05	0.00647375	0.000636354
NZ_CP011454.1	3097723	3098250	-	CDS	GEMMAAP_RS13130	WP_145979130.1	MarR family transcriptional regulator	6.19639	0.836038	-0.154388	0.442803	-0.127336	-0.533958	-0.0431198	0.715945	-0.524217	0.705304	0.0246655	0.894954	0.528702	0.824629	0.18154	0.953224	0.00492733	0.0447329	0.00588627
NZ_CP011454.1	1404343	1404840	+	CDS	GEMMAAP_RS05825	WP_026849855.1	paraquat-inducible protein A	6.08358	0.829967	-0.0704749	-0.128709	-0.137026	-0.158865	-0.0912061	1.77325	1.28887	1.86074	0.0376422	0.951553	0.962711	0.824925	0.76622	0.893916	3.48e-07	4.51e-05	1.71e-07
NZ_CP011454.1	988019	989842	-	CDS	GEMMAAP_RS04120	WP_158514726.1	hypothetical protein	9.63975	0.828568	-1.26892	-0.727176	-0.131343	-1.12433	-0.889137	0.935779	-0.680761	-0.206786	0.273632	0.228108	0.596936	0.91481	0.155574	0.281113	0.0597398	0.185167	0.68023
NZ_CP011454.1	4413122	4414315	+	CDS	GEMMAAP_RS18600	WP_026850926.1	hypothetical protein	8.48402	0.818092	2.20441	2.37604	1.35775	0.869297	0.557237	5.25498	5.83684	5.58674	0.406195	0.0415139	0.0676645	0.228407	0.401872	0.646037	2.26e-07	1.52e-07	1.08e-07
NZ_CP011454.1	347631	349070	+	CDS	GEMMAAP_RS01535	WP_145978940.1	glycosyl hydrolase	5.33876	0.816469	0.136056	0.178212	0.420981	0.288476	0.289215	1.46747	0.866705	1.65448	0.0137881	0.893988	0.875558	0.278843	0.428768	0.452101	1.37e-07	0.000310549	2.27e-08
NZ_CP011454.1	451110	451337	+	CDS	GEMMAAP_RS01985	WP_026849217.1	hypothetical protein	4.92554	0.81585	0.235103	0.552882	0.581415	0.252944	0.263745	1.29561	0.674125	1.47174	0.0150525	0.76938	0.341106	0.140966	0.507398	0.502246	1.06e-06	0.00372155	1.79e-07
NZ_CP011454.1	4561937	4563412	-	CDS	GEMMAAP_RS19210	WP_053334624.1	adenosylhomocysteinase	6.75027	0.809564	-0.385983	-0.0957277	-0.611028	-0.616965	-0.542339	-0.77125	-0.713837	-0.942148	0.00643363	0.380035	0.941224	0.0719603	0.0320491	0.0897732	0.000215018	0.000731743	2.28e-05
NZ_CP011454.1	4187546	4188490	+	CDS	GEMMAAP_RS17665	WP_043579320.1	ATP-binding cassette domain-containing protein	7.62325	0.801956	-0.251131	-0.0480879	-0.241068	-0.0474358	-0.513225	1.80381	1.92387	2.07947	0.261944	0.914728	0.999712	0.820654	0.981948	0.543838	0.000577935	0.000470874	0.000144551
NZ_CP011454.1	4309564	4309923	-	CDS	GEMMAAP_RS18155	WP_158514922.1	hypothetical protein	3.23748	0.794326	0.374135	0.395434	0.263738	0.152548	0.661482	1.11399	0.865442	1.18349	0.0578996	0.665869	0.706381	0.656851	0.786775	0.126701	0.000106533	0.00248792	8.65e-05
NZ_CP011454.1	3378599	3379411	-	CDS	GEMMAAP_RS14335	WP_158514872.1	phosphate ABC transporter substrate-binding protein	2.33324	0.794203	-0.373727	0.470258	-0.18616	0.71708	-0.393387	0.999646	-0.140972	0.386363	0.107732	0.757173	0.70773	0.819048	0.144088	0.522581	0.00145656	0.700238	0.238358
NZ_CP011454.1	3439689	3440609	+	CDS	GEMMAAP_RS14575	WP_026848604.1	universal stress protein	6.88472	0.794172	-0.114517	0.158844	0.262457	-0.0128921	0.279507	2.14246	0.244657	1.31848	0.00836734	0.897387	0.856235	0.468626	0.991437	0.41174	1.05e-10	0.226378	1.9e-07
NZ_CP011454.1	1387310	1389280	+	CDS	GEMMAAP_RS05765	WP_053334211.1	hypothetical protein	7.83332	0.791872	-0.0585163	-0.196963	0.0720671	0.0473497	-0.168144	0.750106	0.726978	0.0757379	0.0222	0.954175	0.83821	0.901657	0.945536	0.722374	0.00202825	0.00352842	0.751898
NZ_CP011454.1	1181817	1183262	+	CDS	GEMMAAP_RS04885	WP_202969189.1	c-type cytochrome	5.26973	0.787624	0.272819	-0.337782	-0.231785	0.137659	-0.299059	0.567069	0.970214	0.188919	0.123624	0.853297	0.833372	0.763856	0.851493	0.654546	0.0846555	0.00647375	0.585021
NZ_CP011454.1	1281247	1281645	-	CDS	GEMMAAP_RS05370	WP_075071436.1	GxxExxY protein	0.335447	0.784358	0.833929	0.783701	0.195255	-0.176312	0.185194	0.0876819	-0.328092	-0.833362	0.393642	0.593122	0.741429	0.907645	0.913179	0.903544	0.881823	0.622453	0.243628
NZ_CP011454.1	4216716	4217450	+	CDS	GEMMAAP_RS17775	WP_145979219.1	hypothetical protein	3.24541	0.782756	0.246161	-0.665241	-0.0489449	0.090838	0.0155283	1.6344	0.829865	1.34899	0.0682743	0.835874	0.537139	0.969978	0.897829	0.9942	7.1e-07	0.00441534	2e-05
NZ_CP011454.1	3301290	3302165	+	CDS	GEMMAAP_RS13995	WP_053333733.1	alpha/beta fold hydrolase	2.0158	0.774488	0.384294	0.298137	-0.0619952	-0.0554228	0.0414367	0.848639	0.455489	0.588723	0.138351	0.741563	0.886352	0.959961	0.984314	0.996617	0.00815759	0.184901	0.0851074
NZ_CP011454.1	4297293	4297643	+	CDS	GEMMAAP_RS18105	WP_026848092.1	ArsC family reductase	3.83519	0.773171	0.2005	-0.00716753	0.296906	0.0124108	0.0468041	1.13643	0.186007	1.01203	0.0110266	0.788098	0.999712	0.443653	0.992808	0.93675	1.35e-06	0.374546	1.13e-05
NZ_CP011454.1	4245142	4245438	-	CDS	GEMMAAP_RS17905	WP_075071564.1	DUF4342 domain-containing protein	5.14386	0.763496	0.108915	0.416177	0.163437	0.270084	0.0181382	1.20531	0.793033	1.43192	0.0199687	0.921211	0.520154	0.727505	0.458977	0.984737	2.27e-06	0.000715422	1.95e-07
NZ_CP011454.1	3072238	3072708	-	CDS	GEMMAAP_RS13030	WP_026849430.1	Cys-tRNA(Pro) deacylase	3.09975	0.759548	0.431043	0.586578	0.609746	0.289381	0.240407	1.5643	0.899252	1.76346	0.204318	0.74417	0.674108	0.408261	0.699004	0.773537	7.91e-05	0.0200069	2.46e-05
NZ_CP011454.1	1532514	1533194	-	CDS	GEMMAAP_RS20510	WP_026850292.1	hypothetical protein	2.18418	0.758989	-0.544812	-0.0273543	-0.126964	0.089095	0.199639	0.949428	-0.151821	1.01631	0.158167	0.624409	0.999712	0.899709	0.9287	0.794239	0.00415476	0.700238	0.00390822
NZ_CP011454.1	2898673	2899422	-	CDS	GEMMAAP_RS12285	WP_026849543.1	hypothetical protein	5.36845	0.758357	0.133692	-0.11763	-0.0110022	-0.110051	0.0760274	1.13963	0.1456	0.515845	0.00729477	0.864314	0.999712	0.990241	0.763132	0.932357	4.8e-07	0.447209	0.00593991
NZ_CP011454.1	1020947	1021129	-	CDS	GEMMAAP_RS04250	WP_026850107.1	hypothetical protein	8.31525	0.7552	0.23557	0.272865	-0.117033	-0.119766	-0.13375	1.20843	0.558027	1.03784	0.0393779	0.804193	0.737209	0.831205	0.818263	0.804117	2.7e-05	0.0304391	0.000155774
NZ_CP011454.1	2449585	2450055	-	CDS	GEMMAAP_RS10405	WP_026849816.1	SsrA-binding protein SmpB	7.53735	0.754302	-0.438493	-0.300037	0.0339759	-0.445259	-0.549276	-0.000584383	-0.805608	-0.539753	0.0647915	0.569171	0.747756	0.974223	0.327988	0.220133	0.998063	0.0065185	0.0493911
NZ_CP011454.1	3664689	3665414	-	CDS	GEMMAAP_RS15510	WP_026848476.1	aquaporin family protein	3.28447	0.752952	0.0456244	0.216461	0.205795	0.414458	0.570865	0.116611	-0.0364692	-0.133247	0.0222	0.964279	0.847642	0.654773	0.226816	0.103276	0.583479	0.886524	0.56787
NZ_CP011454.1	1035504	1036019	-	CDS	GEMMAAP_RS04315	WP_053334270.1	phosphatase PAP2 family protein	-0.231463	0.752548	0.611694	-4.40654	1.0593	-2.6711	0.666884	0.969417	1.26964	1.96186	0.682903	0.891095	0.614156	0.575253	0.293494	0.732072	0.245311	0.150768	0.0202531
NZ_CP011454.1	147442	147861	+	CDS	GEMMAAP_RS00650	WP_026849020.1	hypothetical protein	5.41807	0.746987	-0.158661	-0.290755	-0.082473	0.138486	-0.232436	1.56634	1.64914	1.3715	0.12842	0.92505	0.856399	0.929257	0.841311	0.728653	2.49e-05	2.38e-05	0.000133465
NZ_CP011454.1	992220	992693	-	CDS	GEMMAAP_RS04135	WP_026850125.1	hypothetical protein	8.07343	0.739365	-0.296585	-0.283281	-0.471084	-0.297645	-0.723507	1.63066	1.75005	1.80287	0.265672	0.874917	0.90037	0.577182	0.72238	0.328935	0.000748705	0.000566468	0.00028395
NZ_CP011454.1	2755639	2755884	+	CDS	GEMMAAP_RS11735	WP_026849627.1	zinc ribbon domain-containing protein	4.31686	0.73113	0.302116	-0.168435	0.013608	-0.156688	-0.3102	1.17251	0.504027	1.12982	0.0846455	0.758158	0.938313	0.992345	0.785131	0.554415	9.25e-05	0.0761806	0.00019137
NZ_CP011454.1	85344	86135	+	CDS	GEMMAAP_RS00360	WP_145978922.1	hypothetical protein	7.47579	0.725216	-0.0662948	-0.0827033	0.0312272	-0.161352	0.0825672	1.4159	0.348177	0.843503	0.00661942	0.941504	0.947903	0.956892	0.607532	0.82962	9.87e-09	0.0498554	1.98e-05
NZ_CP011454.1	3395314	3396237	+	CDS	GEMMAAP_RS14400	WP_026848632.1	TerB family tellurite resistance protein	6.1493	0.725199	-0.094269	0.113768	-0.241114	-0.150221	-0.513566	1.85328	1.82961	2.26672	0.32161	0.964502	0.992231	0.831909	0.894027	0.555228	0.000343752	0.000577305	4.43e-05
NZ_CP011454.1	667249	667848	+	CDS	GEMMAAP_RS02890	WP_026849348.1	hypothetical protein	4.05878	0.723972	0.258755	0.269962	0.393287	0.193322	0.324999	0.83598	0.482572	0.485232	0.0467332	0.769453	0.794423	0.387386	0.676055	0.447803	0.000826568	0.0517471	0.0479359
NZ_CP011454.1	90179	91708	-	CDS	GEMMAAP_RS00375	WP_053333866.1	glycosyltransferase family 39 protein	3.22993	0.721463	0.0757081	0.169363	0.401964	0.301833	0.309691	0.397684	0.265249	0.757278	0.0770702	0.948911	0.992231	0.430988	0.518298	0.517985	0.120163	0.341347	0.0059635
NZ_CP011454.1	4692715	4693359	-	CDS	GEMMAAP_RS19780	WP_053333838.1	sigma-70 family RNA polymerase sigma factor	10.0466	0.718058	-0.832931	-0.41135	0.0343098	-0.575513	-0.493232	-0.359405	-0.553249	-0.934309	0.0864531	0.106184	0.596936	0.972683	0.197145	0.290749	0.195604	0.0583944	0.00170417
NZ_CP011454.1	171176	172252	-	CDS	GEMMAAP_RS00765	WP_053333886.1	histidine kinase	3.67373	0.716795	0.449354	-0.207607	0.649954	0.602529	0.334095	0.561661	0.63776	0.64609	0.0168695	0.295323	0.83537	0.0688979	0.0385316	0.302162	0.00384338	0.00202163	0.00172264
NZ_CP011454.1	4453364	4454317	-	CDS	GEMMAAP_RS18755	WP_026850953.1	calcium/sodium antiporter	4.61148	0.714899	-0.161148	-0.116955	0.344612	-0.0385184	0.0736178	0.21537	-0.554717	-0.0455065	0.0222238	0.860884	0.941224	0.372002	0.951275	0.889774	0.286251	0.0128641	0.840954
NZ_CP011454.1	4649315	4650547	+	CDS	GEMMAAP_RS19565	WP_145979259.1	hypothetical protein	6.53685	0.713901	1.09776	0.81914	0.475042	0.431597	0.494631	1.96315	1.9413	2.09495	0.0108401	6.27e-05	0.0216687	0.150249	0.132432	0.100904	1.32e-10	5.13e-10	5.15e-11
NZ_CP011454.1	490296	491234	+	CDS	GEMMAAP_RS02120	WP_026849233.1	ABC transporter ATP-binding protein	6.78399	0.713735	-0.314101	-0.369574	0.119025	-0.0555336	-0.296505	0.629112	0.553368	0.783526	0.158517	0.811275	0.764969	0.889948	0.956412	0.653727	0.0593533	0.109472	0.0211066
NZ_CP011454.1	2941689	2943260	-	CDS	GEMMAAP_RS12485	WP_169804590.1	amino acid permease	7.82965	0.703161	-0.0211252	-0.0609997	-0.0752594	-0.016009	0.0328792	-0.0102787	-0.168843	-0.153099	0.0119396	0.98326	0.981741	0.864462	0.987136	0.952645	0.958599	0.38875	0.406934
NZ_CP011454.1	429681	430010	+	CDS	GEMMAAP_RS01910	WP_043580464.1	heavy metal-binding domain-containing protein	5.54917	0.700279	0.713042	0.513181	0.697109	0.183044	0.328009	2.12267	2.1076	2.14596	0.0282	0.0415139	0.367179	0.0711205	0.646404	0.370834	2.44e-10	8.83e-10	2.34e-10
NZ_CP011454.1	4321941	4322642	-	CDS	GEMMAAP_RS18215	WP_053334564.1	DUF4386 family protein	3.08358	0.698543	-0.442635	-0.0378691	0.425517	0.144135	-0.180268	0.649869	0.00437287	0.325038	0.147147	0.66909	0.999712	0.490009	0.83169	0.797638	0.030218	0.99134	0.30613
NZ_CP011454.1	2889855	2890310	-	CDS	GEMMAAP_RS12240	WP_026849550.1	NADH-quinone oxidoreductase subunit B	5.21123	0.697177	0.0768001	-0.204613	-0.223193	-0.204372	-0.0299338	0.391442	-0.0223884	-0.115664	0.0108038	0.934033	0.770188	0.541151	0.518416	0.95558	0.0277818	0.982702	0.53337
NZ_CP011454.1	40901	41611	-	CDS	GEMMAAP_RS00175	WP_053333855.1	SIMPL domain-containing protein	8.69521	0.693346	0.866152	0.464056	0.602319	0.251017	0.121817	2.59133	3.17101	2.70027	0.313367	0.415627	0.752824	0.455449	0.77721	0.918573	8.4e-06	1.47e-06	4.72e-06
NZ_CP011454.1	636384	636644	+	CDS	GEMMAAP_RS02795	WP_026849337.1	hypothetical protein	1.81751	0.692566	0.399122	-0.288404	-0.21195	0.266993	-0.073886	2.20058	1.78713	2.85111	0.51439	0.894221	0.985589	0.915699	0.850793	0.978289	0.00013077	0.0025482	5.47e-06
NZ_CP011454.1	3171417	3171605	-	CDS	GEMMAAP_RS20320	WP_026848785.1	hypothetical protein	0.136066	0.691229	0.856428	1.06614	-0.0863358	0.0145142	0.0247329	-0.358187	-1.06323	-1.07889	0.592982	0.716408	0.692218	0.980085	0.999236	0.996617	0.637298	0.242977	0.261239
NZ_CP011454.1	3377743	3378591	-	CDS	GEMMAAP_RS14330	WP_026848642.1	phosphate ABC transporter permease subunit PstC	1.65704	0.687162	-0.193097	0.304794	-0.11059	0.822271	-0.0110478	-0.48025	-1.08145	-0.140488	0.178744	0.907609	0.906827	0.908817	0.0927952	0.996617	0.144967	0.00620138	0.705279
NZ_CP011454.1	1610219	1611466	-	CDS	GEMMAAP_RS06690	WP_026850344.1	ABC transporter permease	7.86248	0.684663	-0.405184	-0.31657	-0.370404	-0.489242	-0.662859	-0.140646	0.23073	-0.61405	0.328302	0.829225	0.883814	0.677238	0.538853	0.402116	0.76035	0.640061	0.167854
NZ_CP011454.1	1613638	1615128	-	CDS	GEMMAAP_RS06705	WP_158514758.1	TolC family protein	8.76226	0.68012	-0.254948	-0.370157	-0.486799	-0.370736	-0.705194	0.368955	0.427047	0.334422	0.232589	0.880134	0.772246	0.477113	0.58245	0.253948	0.319756	0.276173	0.365738
NZ_CP011454.1	1563145	1563708	+	CDS	GEMMAAP_RS06490	WP_082821112.1	2-vinyl bacteriochlorophyllide hydratase	7.07348	0.678078	0.440703	0.241819	0.338773	0.0718819	0.494675	0.580168	0.49553	0.781984	0.0316707	0.3701	0.738901	0.376345	0.885776	0.147862	0.00773411	0.0260314	0.00064412
NZ_CP011454.1	4172987	4173943	+	CDS	GEMMAAP_RS17590	WP_026848171.1	AraC family transcriptional regulator	4.96971	0.678004	-0.573564	-0.240493	0.156601	-0.313681	-0.308121	0.713547	0.511774	0.582503	0.161924	0.500868	0.90214	0.838422	0.588377	0.62037	0.0231962	0.115273	0.0650916
NZ_CP011454.1	3221199	3221768	+	CDS	GEMMAAP_RS13635	WP_145979141.1	DUF2628 domain-containing protein	9.24398	0.676256	1.25995	1.22886	0.870069	0.5718	0.381239	3.38622	3.84316	3.63812	0.368934	0.206069	0.269882	0.301837	0.491906	0.68898	1.21e-06	5.64e-07	4.67e-07
NZ_CP011454.1	4397034	4397756	-	CDS	GEMMAAP_RS18535	WP_053334584.1	DUF2461 domain-containing protein	5.50872	0.674659	0.296593	0.20844	0.229507	0.234263	0.202623	-0.603533	-0.729885	-0.385519	0.0266698	0.619511	0.80033	0.568221	0.505368	0.604776	0.00427741	0.00132352	0.0637057
NZ_CP011454.1	4331542	4331895	-	CDS	GEMMAAP_RS18250	WP_043581798.1	TfoX/Sxy family protein	6.04108	0.674555	-0.335719	0.111955	0.641207	0.0497659	0.394896	1.65003	0.636602	1.42995	0.0647915	0.666743	0.964366	0.140966	0.945536	0.342659	2.34e-07	0.0125817	1.99e-06
NZ_CP011454.1	1207746	1208150	+	CDS	GEMMAAP_RS04985	WP_053334246.1	YbjN domain-containing protein	8.00629	0.673394	-0.19563	0.23235	-0.179217	-0.301827	-0.464975	1.09906	0.944434	1.33316	0.159176	0.89517	0.874425	0.794286	0.605932	0.405633	0.00140445	0.00613929	0.000216625
NZ_CP011454.1	4183926	4184756	-	CDS	GEMMAAP_RS17645	WP_053333548.1	creatininase family protein	4.95769	0.67311	0.128108	-0.0986188	0.144545	0.0784527	0.184686	1.08758	1.07821	0.929585	0.0447477	0.903163	0.971133	0.767814	0.879382	0.675374	1.61e-05	3.32e-05	0.00014485
NZ_CP011454.1	3617773	3618090	+	CDS	GEMMAAP_RS20640	WP_158514886.1	TonB-dependent receptor plug domain-containing protein	6.93198	0.672566	1.76248	1.50425	0.861616	0.649908	0.503481	4.06967	4.22012	3.94102	0.425654	0.0527072	0.212698	0.374485	0.47091	0.62037	2.52e-07	3.35e-07	3.3e-07
NZ_CP011454.1	172249	173043	-	CDS	GEMMAAP_RS00770	WP_158514678.1	tetratricopeptide repeat protein	3.13766	0.66458	-0.215094	-0.510806	0.26106	0.0575932	-0.161856	0.47779	0.505637	0.458935	0.107732	0.860884	0.612922	0.650012	0.943735	0.786863	0.0621483	0.0623028	0.0861682
NZ_CP011454.1	1704564	1704992	+	CDS	GEMMAAP_RS07075	WP_026850402.1	acyl-CoA thioesterase	3.84476	0.657144	-0.594977	-0.467367	0.247323	-0.216913	-0.13812	-0.251586	-0.515526	-0.526761	0.0781219	0.295323	0.582164	0.628547	0.644621	0.800686	0.300843	0.0501762	0.0444701
NZ_CP011454.1	1034305	1035507	-	CDS	GEMMAAP_RS04310	WP_026850098.1	glycosyltransferase	1.40411	0.654972	0.550727	1.04226	1.27543	0.768044	0.0891546	0.829937	0.42407	1.29177	0.37104	0.704858	0.435486	0.0936147	0.268746	0.948499	0.0398186	0.356007	0.00338761
NZ_CP011454.1	2964611	2965384	-	CDS	GEMMAAP_RS12580	WP_145979124.1	electron transfer flavoprotein subunit beta/FixA family protein	7.28541	0.654643	0.162306	0.19537	0.0480162	0.076177	0.1309	0.830987	0.547222	0.921511	0.027809	0.854714	0.794548	0.930035	0.865777	0.756801	0.000177636	0.0100098	5.28e-05
NZ_CP011454.1	1417623	1419320	-	CDS	GEMMAAP_RS05870	WP_075071445.1	FAD-dependent oxidoreductase	4.81912	0.65386	-0.20932	0.22521	-0.00526647	-0.32901	-0.178714	1.77872	0.264627	0.863983	0.0770702	0.840602	0.850633	0.998698	0.434736	0.727542	4.53e-08	0.301406	0.000915092
NZ_CP011454.1	992690	993988	-	CDS	GEMMAAP_RS04140	WP_145978990.1	hypothetical protein	8.55911	0.652006	-0.26494	-0.133387	-0.449646	-0.267256	-0.763907	1.94668	2.00083	2.21016	0.344977	0.895311	0.985589	0.605462	0.759594	0.306458	0.000179764	0.000212135	4.63e-05
NZ_CP011454.1	422833	423909	-	CDS	GEMMAAP_RS01885	WP_145978953.1	hypothetical protein	0.844458	0.649188	-0.27554	0.808686	0.16613	-0.0490089	-0.850864	1.54115	1.2896	0.832991	0.48923	0.930111	0.724162	0.918873	0.987458	0.462643	0.00170059	0.0130477	0.12818
NZ_CP011454.1	1586075	1586899	-	CDS	GEMMAAP_RS06585	WP_026850327.1	photosynthetic reaction center subunit L	8.21859	0.648997	0.524055	0.247364	0.299567	0.231077	0.347494	1.12677	1.62163	0.885148	0.0216793	0.13335	0.656561	0.369134	0.471027	0.258092	1.46e-06	1.28e-08	3.71e-05
NZ_CP011454.1	2491448	2493817	+	CDS	GEMMAAP_RS10635	WP_202969113.1	phosphoenolpyruvate synthase	5.40019	0.648398	-0.57462	0.00487635	0.264417	0.64459	-0.285938	2.2236	-0.494087	0.522096	0.161887	0.469744	0.999712	0.676577	0.181718	0.634669	1.21e-07	0.126063	0.0867983
NZ_CP011454.1	339772	340710	+	CDS	GEMMAAP_RS01500	WP_145978938.1	nuclease	5.15518	0.638355	0.704727	0.358674	0.148195	0.085005	0.198934	0.533796	0.344605	0.297086	0.00840063	0.00211942	0.399723	0.646146	0.786775	0.471368	0.000974783	0.0315825	0.0564503
NZ_CP011454.1	3364600	3365244	+	CDS	GEMMAAP_RS14265	WP_053333723.1	HAD-IA family hydrolase	4.0408	0.637495	-0.182312	0.101986	0.335381	-0.163836	-0.0426412	0.980304	0.0041333	0.949427	0.0764339	0.862947	0.973647	0.464765	0.724901	0.951849	9.8e-05	0.988719	0.000198645
NZ_CP011454.1	4535014	4535544	+	CDS	GEMMAAP_RS19095	WP_026850999.1	TlpA family protein disulfide reductase	3.25502	0.630468	-0.261817	0.216099	0.225647	0.510569	0.152136	1.21352	0.720104	1.31734	0.210776	0.860884	0.92985	0.760893	0.342713	0.842126	0.000270705	0.0289446	0.000158212
NZ_CP011454.1	4566314	4567102	+	CDS	GEMMAAP_RS19225	WP_075071708.1	ABC transporter permease	5.54761	0.626288	-0.290876	-0.00989345	-0.0202727	0.105615	-0.229323	1.2717	-0.384475	0.0947717	0.0246655	0.595262	0.999712	0.978117	0.779897	0.497532	1.54e-07	0.050388	0.624651
NZ_CP011454.1	1824799	1825911	+	CDS	GEMMAAP_RS07585	WP_158514769.1	HmuY family protein	7.23035	0.624033	-1.19153	-0.447734	0.134945	-0.569323	0.011303	0.830074	-0.549254	0.0634186	0.0864531	0.00146662	0.510086	0.797117	0.138187	0.996617	0.00136591	0.0315253	0.804281
NZ_CP011454.1	2613507	2613728	-	CDS	GEMMAAP_RS11145	WP_026849713.1	translation initiation factor IF-1	4.48686	0.622452	0.220022	0.328051	0.636996	0.353216	0.304404	0.0370108	-0.488316	0.204892	0.095673	0.829225	0.718315	0.149649	0.387592	0.484889	0.886512	0.0614932	0.410993
NZ_CP011454.1	2489214	2489600	-	CDS	GEMMAAP_RS19995	WP_053334166.1	sterol desaturase family protein	2.68697	0.62085	0.241411	-0.2436	0.481548	0.420594	0.305743	0.985154	0.435433	1.01172	0.166111	0.845486	0.912303	0.387386	0.37849	0.572641	0.000628082	0.136151	0.000834654
NZ_CP011454.1	1342154	1344214	-	CDS	GEMMAAP_RS05615	WP_026849890.1	hypothetical protein	5.07134	0.620071	-0.000842613	-0.022676	0.0689575	-0.0709602	-0.0532954	1.59643	1.50051	1.71785	0.103163	0.999855	0.999712	0.918764	0.917063	0.942666	2.93e-07	1.52e-06	1.08e-07
NZ_CP011454.1	805347	806075	+	CDS	GEMMAAP_RS03435	WP_158514713.1	PEP-CTERM sorting domain-containing protein	6.93617	0.618535	0.54565	0.574367	0.235273	-0.050265	0.235175	2.38375	2.01354	2.28083	0.0400852	0.152366	0.204163	0.56006	0.931878	0.517985	3.8e-11	1.47e-09	6.77e-11
NZ_CP011454.1	2804514	2806091	+	CDS	GEMMAAP_RS11910	WP_082821269.1	SulP family inorganic anion transporter	5.50687	0.61825	0.112593	0.0886889	0.0864308	-0.0842019	0.162587	1.17575	1.28947	1.04648	0.0246655	0.895311	0.962711	0.850459	0.83172	0.654086	3.5e-07	1.8e-07	2.43e-06
NZ_CP011454.1	1491499	1492002	+	CDS	GEMMAAP_RS06135	WP_082821106.1	hypothetical protein	5.59933	0.61479	0.120899	0.196781	0.0765281	0.16063	0.0578706	1.23209	0.483843	1.25076	0.0246655	0.887013	0.785426	0.870003	0.63799	0.903544	1.53e-07	0.0109873	1.35e-07
NZ_CP011454.1	312085	313077	+	CDS	GEMMAAP_RS01390	WP_026849130.1	OmpA family protein	5.02003	0.613988	0.246654	0.584605	-0.919546	0.318408	-0.0294296	1.04824	3.28215	1.58256	0.703853	0.947067	0.916793	0.650584	0.865777	0.996617	0.194475	0.000699773	0.0581964
NZ_CP011454.1	4403765	4404127	-	CDS	GEMMAAP_RS18570	WP_026850922.1	hypothetical protein	8.43987	0.613382	-0.272411	-0.0801247	-0.414035	-0.291178	-0.468998	1.42598	1.52931	1.35149	0.333031	0.884074	0.992231	0.604584	0.708755	0.522581	0.00140786	0.00109226	0.0021342
NZ_CP011454.1	120427	121068	-	CDS	GEMMAAP_RS00510	WP_145978925.1	hypothetical protein	3.74061	0.612708	0.17635	-0.0170807	0.685409	0.450227	0.396828	0.631061	0.42475	0.881373	0.0767053	0.860884	0.999712	0.0936147	0.206564	0.287987	0.00491609	0.0661918	0.000314492
NZ_CP011454.1	3269953	3270804	-	CDS	GEMMAAP_RS13845	WP_026848714.1	hypothetical protein	6.97246	0.611817	0.0269533	0.0853638	-0.375422	-0.274871	-0.248699	1.90827	2.33189	1.98537	0.239665	0.991568	0.992231	0.588792	0.671174	0.721632	7.8e-06	1.18e-06	4.51e-06
NZ_CP011454.1	191990	192247	+	CDS	GEMMAAP_RS00845	WP_026849044.1	hypothetical protein	4.45385	0.611526	0.167131	-0.0326073	0.326536	0.103683	0.0957966	1.28581	0.761015	1.41198	0.0774069	0.864314	0.999712	0.461212	0.83172	0.863847	1.75e-06	0.00176549	5.53e-07
NZ_CP011454.1	28778	30127	+	CDS	GEMMAAP_RS00120	WP_026848946.1	TldD/PmbA family protein	9.33006	0.609103	-0.578659	1.28159	-0.730659	-0.647702	-1.15218	-1.1058	-0.90494	-1.70515	0.53733	0.80809	0.399621	0.513201	0.550206	0.255551	0.0732601	0.156331	0.00881186
NZ_CP011454.1	3792611	3793153	-	CDS	GEMMAAP_RS16020	WP_026848404.1	hypothetical protein	5.82829	0.608899	0.250521	0.387577	0.0976973	0.337437	0.0494176	0.614227	0.0767955	0.557109	0.0465447	0.717477	0.519211	0.840051	0.318942	0.932723	0.00336796	0.737078	0.00790394
NZ_CP011454.1	1625206	1625520	-	CDS	GEMMAAP_RS06735	WP_026850350.1	DUF485 domain-containing protein	3.50431	0.605143	0.176668	0.183671	0.284522	-0.171912	0.204166	0.742666	0.357246	0.787903	0.0811822	0.860884	0.933522	0.534633	0.70149	0.64559	0.00119082	0.120838	0.00104065
NZ_CP011454.1	213905	214732	-	CDS	GEMMAAP_RS00930	WP_158514682.1	host specificity protein	3.4507	0.604855	0.0437284	-0.748992	0.354636	-0.253167	-0.324119	1.51072	1.32439	1.48732	0.0960986	0.965706	0.335456	0.439607	0.557708	0.455054	1.53e-07	2.6e-06	2.98e-07
NZ_CP011454.1	3868371	3869513	+	CDS	GEMMAAP_RS16380	WP_026848345.1	ketoacyl-ACP synthase III	5.98542	0.602758	-0.172415	0.185928	0.4571	0.147967	0.32544	0.818277	0.695794	0.930472	0.020161	0.788098	0.783928	0.134525	0.645102	0.241574	2.6e-05	0.000290566	4.98e-06
NZ_CP011454.1	315017	316159	+	CDS	GEMMAAP_RS01400	WP_026849132.1	helix-turn-helix transcriptional regulator	7.54318	0.601766	-0.24804	0.0171543	-0.0341782	-0.0376516	-0.39432	1.47834	1.88002	1.9046	0.465883	0.926657	0.999712	0.989671	0.990831	0.705737	0.00714712	0.00169634	0.00107004
NZ_CP011454.1	2890413	2890778	-	CDS	GEMMAAP_RS12245	WP_026849549.1	NADH-quinone oxidoreductase subunit A	6.09794	0.60096	0.0584779	0.139164	0.138155	-0.256818	0.11243	0.523601	0.109449	0.141676	0.0261044	0.942652	0.879509	0.722617	0.398343	0.773537	0.00474382	0.579655	0.437693
NZ_CP011454.1	2203113	2203472	-	CDS	GEMMAAP_RS09300	WP_026850777.1	hypothetical protein	7.2925	0.599844	-0.0737507	0.00476401	-0.179937	-0.021854	-0.223214	1.74418	1.78174	2.01915	0.250539	0.962747	0.999712	0.81379	0.991437	0.755275	2.51e-05	3.26e-05	3.94e-06
NZ_CP011454.1	1033147	1034298	-	CDS	GEMMAAP_RS04305	WP_082821053.1	glycosyltransferase family 1 protein	4.52842	0.598959	-0.309364	-0.0345487	0.540028	0.123825	-0.00763252	0.820338	0.712539	0.903264	0.26991	0.83508	0.999712	0.402219	0.87723	0.997347	0.016816	0.0455361	0.0108094
NZ_CP011454.1	3737354	3739960	-	CDS	GEMMAAP_RS15815	WP_043579393.1	hypothetical protein	7.72676	0.59858	-0.372113	-0.483293	0.497665	-0.423864	-0.788019	0.56273	0.825001	0.332629	0.459269	0.864314	0.80404	0.628903	0.662383	0.379204	0.266524	0.122093	0.516459
NZ_CP011454.1	3427185	3427787	+	CDS	GEMMAAP_RS14525	WP_082821581.1	lysophospholipid acyltransferase family protein	4.02671	0.597772	0.375137	0.07355	0.0657916	0.0458206	0.0963029	0.59548	-0.0168381	0.580738	0.0558365	0.469744	0.985589	0.975078	0.940728	0.842126	0.0041596	0.947991	0.00665764
NZ_CP011454.1	4031016	4031342	-	CDS	GEMMAAP_RS16985	WP_026848252.1	nucleotide pyrophosphohydrolase	4.72118	0.595202	0.345729	0.517353	0.0441935	-0.00334834	-0.136326	0.21021	-0.237652	0.280582	0.035712	0.460052	0.286366	0.939294	0.999236	0.728653	0.253017	0.232104	0.136701
NZ_CP011454.1	4523618	4523833	+	CDS	GEMMAAP_RS19030	WP_026850990.1	(4Fe-4S)-binding protein	5.59722	0.590633	0.0663268	0.0604484	-0.298048	-0.410185	-0.206936	1.71808	1.13252	1.64174	0.112432	0.950887	0.992231	0.553829	0.318983	0.670714	9.77e-08	6.06e-05	1.99e-07
NZ_CP011454.1	2939697	2940731	+	CDS	GEMMAAP_RS12475	WP_145979121.1	hypothetical protein	1.52344	0.590147	0.163064	-0.724258	0.320725	0.111233	0.169228	0.282742	0.356419	0.483939	0.391338	0.941504	0.728214	0.736352	0.926595	0.872389	0.480219	0.412605	0.251065
NZ_CP011454.1	3585282	3586529	-	CDS	GEMMAAP_RS15170	WP_075071542.1	ABC transporter permease	5.74378	0.590071	-0.224945	-0.549524	-0.212533	-0.174649	-0.251711	0.366315	1.22759	0.460227	0.136552	0.837412	0.491516	0.707349	0.732593	0.618666	0.149439	6.24e-05	0.0750126
NZ_CP011454.1	4321303	4321944	-	CDS	GEMMAAP_RS18210	WP_026850874.1	class I SAM-dependent methyltransferase	3.62906	0.588841	-0.161784	0.0342166	0.357294	0.102399	0.170184	0.124333	-0.0252728	0.351112	0.128102	0.893174	0.999712	0.463018	0.853143	0.746863	0.616679	0.934709	0.16255
NZ_CP011454.1	2831297	2831917	+	CDS	GEMMAAP_RS12010	WP_026849582.1	hypothetical protein	3.21073	0.588304	0.375938	0.701922	0.688916	0.288353	0.743734	-0.28008	-0.270952	-0.300762	0.251249	0.73864	0.480746	0.226927	0.63219	0.142594	0.382507	0.438184	0.388715
NZ_CP011454.1	1272906	1273424	+	CDS	GEMMAAP_RS05340	WP_026849935.1	DUF456 domain-containing protein	7.84474	0.585769	-0.327551	-0.242947	-0.479089	-0.303258	-0.620973	0.323873	0.390138	0.400408	0.161887	0.73864	0.833372	0.333249	0.538853	0.173737	0.2407	0.178743	0.144891
NZ_CP011454.1	4238413	4238841	-	CDS	GEMMAAP_RS17875	WP_026848128.1	CBS domain-containing protein	4.93332	0.585599	0.0883584	0.139715	0.254533	-0.0442825	0.169548	1.02551	0.421142	0.91708	0.052157	0.931656	0.913286	0.525504	0.940763	0.670252	9.32e-06	0.0419877	5.19e-05
NZ_CP011454.1	450818	451129	+	CDS	GEMMAAP_RS01980	WP_202969181.1	BrnT family toxin	5.35275	0.585394	-0.149664	0.209871	0.629115	0.41755	-0.0786442	1.17682	0.504072	1.47324	0.102482	0.893174	0.853048	0.135763	0.270828	0.89937	1.23e-05	0.0374022	5.35e-07
NZ_CP011454.1	4486088	4487164	-	CDS	GEMMAAP_RS18905	WP_026850973.1	hypothetical protein	4.78314	0.583353	-0.396685	-0.129822	0.296597	0.0456968	0.0846973	0.265545	-0.103521	0.128325	0.0246655	0.308869	0.910928	0.35206	0.925999	0.828298	0.115065	0.583662	0.463725
NZ_CP011454.1	56585	57229	-	CDS	GEMMAAP_RS00250	WP_202969212.1	SGNH/GDSL hydrolase family protein	3.28858	0.580941	0.337604	0.438847	-0.0520691	-0.272087	0.0538439	0.813474	0.239405	0.573478	0.122061	0.652152	0.57801	0.991142	0.542869	0.940671	0.00101203	0.348241	0.0210289
NZ_CP011454.1	150156	150530	+	CDS	GEMMAAP_RS00665	WP_053333877.1	hypothetical protein	6.41893	0.578136	-0.40929	-0.388863	0.0381567	-0.0795316	-0.358411	0.719394	0.796652	0.768737	0.152685	0.600456	0.654539	0.96781	0.907226	0.452101	0.00827004	0.00533792	0.00546755
NZ_CP011454.1	18616	19362	+	CDS	GEMMAAP_RS00090	WP_026848943.1	type 1 glutamine amidotransferase domain-containing protein	3.99098	0.575719	0.0211167	0.00889542	0.227382	-0.0351769	-0.073063	1.15512	0.755424	1.74963	0.295314	0.994826	0.999712	0.767814	0.981948	0.944323	0.00105592	0.0320352	1.1e-05
NZ_CP011454.1	3016144	3018582	+	CDS	GEMMAAP_RS12790	WP_053334048.1	hypothetical protein	4.91005	0.574369	-0.159847	-0.0433019	-0.130303	-0.344519	-0.0554001	1.31386	1.70584	1.56218	0.122061	0.891095	0.999594	0.824138	0.406369	0.939143	3.63e-06	1.55e-07	3.23e-07
NZ_CP011454.1	4187176	4187433	-	CDS	GEMMAAP_RS20395	WP_145979217.1	hypothetical protein	4.85655	0.572966	-0.0803525	0.301384	0.272351	-0.0598094	0.230724	1.90873	1.48695	2.32256	0.152364	0.946258	0.779442	0.618856	0.938057	0.654086	3.07e-08	2.91e-06	1.42e-09
NZ_CP011454.1	20043	20612	-	CDS	GEMMAAP_RS00100	WP_082820931.1	Uma2 family endonuclease	6.12132	0.571529	0.161425	-0.0149742	0.390143	0.0796471	0.235198	0.826007	0.28421	1.05434	0.0108401	0.757173	0.999712	0.140966	0.790221	0.3548	2.96e-06	0.0625392	8.11e-08
NZ_CP011454.1	1085865	1087109	+	CDS	GEMMAAP_RS04520	WP_026850071.1	TonB family protein	6.79639	0.570581	-0.128744	0.220781	0.202858	0.156115	-0.179732	0.799648	1.02647	1.0315	0.23959	0.938883	0.896857	0.765019	0.812711	0.794919	0.0132254	0.0030741	0.00223747
NZ_CP011454.1	3593888	3594742	+	CDS	GEMMAAP_RS15195	WP_026848516.1	arsenite methyltransferase	3.70174	0.570563	0.178575	0.295911	0.639266	0.375825	0.250584	1.11591	1.06299	1.18129	0.131529	0.867401	0.772246	0.149649	0.355498	0.595891	3.09e-05	0.000107282	2.11e-05
NZ_CP011454.1	2751858	2753666	-	CDS	GEMMAAP_RS11720	WP_053334108.1	HupE/UreJ family protein	4.81262	0.570086	0.140947	0.00713986	0.520779	-0.0375128	0.40543	0.700512	0.610781	0.282408	0.0612938	0.872186	0.999712	0.152009	0.951275	0.214432	0.000855027	0.00415632	0.161272
NZ_CP011454.1	1606423	1607670	-	CDS	GEMMAAP_RS06675	WP_082821547.1	ABC transporter permease	6.97574	0.569675	-0.278336	-0.292983	0.0635853	-0.284457	-0.382464	-0.539393	0.102587	-0.997072	0.330535	0.864082	0.864957	0.959961	0.692522	0.592737	0.14782	0.809609	0.0115645
NZ_CP011454.1	2473607	2475091	-	CDS	GEMMAAP_RS10545	WP_026849796.1	amino acid permease	6.60557	0.569638	-0.122337	-0.13107	-0.0803261	-0.333845	-0.15126	0.517598	0.353004	0.165487	0.0278218	0.871668	0.881202	0.847538	0.236764	0.660495	0.00399647	0.0511905	0.340104
NZ_CP011454.1	2971433	2972224	-	CDS	GEMMAAP_RS12600	WP_053334061.1	CPBP family intramembrane metalloprotease	4.15442	0.566183	0.52197	0.169778	0.353558	0.307014	0.301913	1.66899	1.24413	1.81508	0.154526	0.373254	0.927238	0.484512	0.488289	0.515921	1.7e-07	2.7e-05	5.67e-08
NZ_CP011454.1	2040229	2040774	+	CDS	GEMMAAP_RS08480	WP_026850618.1	hypothetical protein	6.34555	0.565832	0.0132072	-0.135596	-0.274179	-0.295069	-0.196762	0.429356	-0.281391	0.0931936	0.0447477	0.99279	0.892996	0.450204	0.352416	0.586018	0.0234499	0.15333	0.631548
NZ_CP011454.1	4391393	4392370	-	CDS	GEMMAAP_RS18510	WP_145979236.1	hypothetical protein	2.79526	0.565562	-0.181176	0.0753286	0.144335	0.0212232	-0.309591	0.695156	0.851475	0.508641	0.312426	0.920983	0.993197	0.875471	0.992955	0.661819	0.0333062	0.0141399	0.141524
NZ_CP011454.1	1394875	1395258	+	CDS	GEMMAAP_RS05795	WP_026849860.1	YccF domain-containing protein	6.71739	0.563951	-0.349848	-0.319969	-0.193357	-0.145232	-0.469504	0.142178	0.392882	-0.0809111	0.313367	0.791958	0.838482	0.811415	0.853143	0.462852	0.695513	0.294202	0.831591
NZ_CP011454.1	4378187	4378408	+	CDS	GEMMAAP_RS18455	WP_026850906.1	hypothetical protein	5.67577	0.558987	0.143089	0.197664	-0.189778	-0.0755987	-0.125451	0.77863	-0.0593376	0.985243	0.0612938	0.868311	0.819581	0.652716	0.866615	0.771607	0.000284823	0.795317	1.89e-05
NZ_CP011454.1	3814663	3816351	+	CDS	GEMMAAP_RS16125	WP_026848385.1	GMC family oxidoreductase	5.96393	0.558896	0.149018	0.38874	0.529987	0.0979595	0.367502	1.53264	1.65588	1.4497	0.0376422	0.846103	0.432666	0.0995397	0.786775	0.201874	3.98e-09	2.98e-09	9.95e-09
NZ_CP011454.1	3837120	3837710	+	CDS	GEMMAAP_RS16225	WP_026848367.1	DUF4440 domain-containing protein	4.39987	0.557179	-0.973636	-0.29507	-0.353252	-0.89682	-0.513924	0.463039	-0.670241	-0.426836	0.191499	0.0514272	0.823223	0.546344	0.045106	0.282497	0.0911495	0.0258718	0.14046
NZ_CP011454.1	3541300	3541983	-	CDS	GEMMAAP_RS14960	WP_026848553.1	hypothetical protein	7.30711	0.554926	-0.285532	-0.472048	-0.261656	-0.274364	-0.42584	0.903785	1.01717	0.921206	0.265902	0.831981	0.635774	0.697841	0.652165	0.46253	0.00736667	0.00417788	0.00648279
NZ_CP011454.1	4275783	4276787	-	CDS	GEMMAAP_RS18030	WP_043579298.1	hypothetical protein	3.55373	0.552787	-0.182755	0.15425	-0.225399	-0.253631	-0.106304	0.644511	0.0172593	0.553187	0.226516	0.89517	0.956843	0.73483	0.649503	0.888193	0.0221806	0.962376	0.0574408
NZ_CP011454.1	3414327	3415682	-	CDS	GEMMAAP_RS14480	WP_053333709.1	aminotransferase class V-fold PLP-dependent enzyme	8.37494	0.55194	-0.368039	-0.0578081	-0.109451	-0.364256	-0.341988	-0.195478	-0.569185	-0.575765	0.264469	0.741517	0.993197	0.889948	0.517453	0.572565	0.548296	0.0898545	0.0727398
NZ_CP011454.1	1462493	1462801	-	CDS	GEMMAAP_RS06040	WP_026850244.1	hypothetical protein	4.3754	0.550444	0.295224	0.0452194	0.335993	0.485369	0.327268	1.58101	1.41882	1.44119	0.136354	0.717477	0.997614	0.470129	0.19926	0.437911	1.53e-07	1.67e-06	8.59e-07
NZ_CP011454.1	1016382	1019465	+	CDS	GEMMAAP_RS04235	WP_043581084.1	efflux RND transporter permease subunit	1.9273	0.550359	-0.10584	-0.642088	0.321424	-0.465318	-0.0826033	-0.251509	-0.127148	-0.270602	0.328302	0.947067	0.663258	0.665184	0.462333	0.937345	0.469416	0.750445	0.485434
NZ_CP011454.1	3781000	3781533	+	CDS	GEMMAAP_RS15970	WP_158514893.1	hypothetical protein	5.83685	0.54547	0.25868	-0.33849	-0.676111	-0.30149	-0.401985	0.293988	-0.442257	-0.127553	0.161887	0.788098	0.705692	0.165408	0.504624	0.3739	0.244892	0.100877	0.632464
NZ_CP011454.1	3869599	3870024	+	CDS	GEMMAAP_RS16385	WP_026848344.1	hypothetical protein	4.16361	0.543691	0.336068	0.558367	0.111492	0.294165	0.116292	-0.526438	-0.840911	-0.732164	0.115908	0.614907	0.343923	0.836966	0.440535	0.818122	0.0222471	0.00125759	0.00407635
NZ_CP011454.1	46502	47749	+	CDS	GEMMAAP_RS00200	WP_026848958.1	dicarboxylate/amino acid:cation symporter	5.23212	0.53971	0.023338	0.0969275	0.456352	0.279452	0.465623	0.418593	0.341203	0.562996	0.0175115	0.999855	0.919308	0.0889659	0.241842	0.0612394	0.00525894	0.0262664	0.00045999
NZ_CP011454.1	2022534	2023094	-	CDS	GEMMAAP_RS08390	WP_145979062.1	hypothetical protein	1.44465	0.53932	0.211075	-0.323866	-0.0915071	-0.364949	-0.296616	-0.859521	-0.682317	-0.788182	0.306308	0.891095	0.879251	0.923922	0.55155	0.659071	0.0126614	0.0602574	0.039981
NZ_CP011454.1	4069942	4070436	-	CDS	GEMMAAP_RS17165	WP_202969160.1	tRNA (cytidine(34)-2'-O)-methyltransferase	4.30016	0.536646	0.215076	0.456473	0.313056	0.17648	0.225195	0.268922	-0.286443	0.472554	0.0467433	0.732739	0.335456	0.349398	0.585128	0.477848	0.121944	0.126755	0.0101704
NZ_CP011454.1	1796568	1796813	+	CDS	GEMMAAP_RS07475	WP_026850463.1	hypothetical protein	9.24126	0.536288	0.0665016	0.189631	-0.249703	-0.399919	-0.0906984	0.244651	-0.0594876	0.0382309	0.20582	0.959768	0.886205	0.646146	0.394274	0.902431	0.383479	0.855966	0.898329
NZ_CP011454.1	369794	370792	-	CDS	GEMMAAP_RS01630	WP_043580137.1	sigma-70 family RNA polymerase sigma factor	3.69442	0.534829	0.469287	0.0777859	-0.0791082	-0.00786909	0.393341	1.15492	1.43721	1.27563	0.112432	0.327996	0.99005	0.895878	0.998434	0.265848	3.07e-06	2.51e-07	1.11e-06
NZ_CP011454.1	168109	168684	-	CDS	GEMMAAP_RS00750	WP_053333884.1	hypothetical protein	4.74701	0.53329	0.16016	0.325017	0.236535	0.248535	0.15638	1.43069	0.742292	1.44462	0.0609691	0.83975	0.589768	0.530208	0.434083	0.674343	1.93e-08	0.000353681	1.96e-08
NZ_CP011454.1	3059093	3059812	-	CDS	GEMMAAP_RS12960	WP_043580631.1	hypothetical protein	7.55269	0.529766	-0.187466	-0.376364	-0.339295	-0.37437	-0.634336	1.20808	1.12957	0.996008	0.347855	0.917272	0.768568	0.644758	0.557926	0.294014	0.00193015	0.00433371	0.00797366
NZ_CP011454.1	1608948	1610213	-	CDS	GEMMAAP_RS06685	WP_026850343.1	ABC transporter permease	7.12102	0.527118	-0.386543	-0.279097	-0.148089	-0.271894	-0.571047	-0.339019	0.113445	-0.901877	0.398976	0.79741	0.893708	0.883963	0.728034	0.419557	0.39526	0.803454	0.0287935
NZ_CP011454.1	1208154	1209017	+	CDS	GEMMAAP_RS04990	WP_026849994.1	PspA/IM30 family protein	8.40379	0.525817	-0.213792	0.110558	-0.317213	-0.27684	-0.247903	0.295471	0.236151	0.297574	0.186935	0.856581	0.964366	0.519513	0.557619	0.630771	0.261253	0.399685	0.254725
NZ_CP011454.1	3397244	3399682	+	CDS	GEMMAAP_RS14410	WP_026848630.1	TonB-dependent receptor	3.6776	0.525741	0.370336	0.277943	0.0671401	-0.125447	0.135622	0.796494	0.848301	0.788199	0.214398	0.659183	0.833372	0.934684	0.83172	0.822837	0.00310662	0.00274509	0.00471433
NZ_CP011454.1	1678737	1679117	-	CDS	GEMMAAP_RS06955	WP_026850385.1	ribosome silencing factor	8.40189	0.523959	-0.455932	0.0385242	0.327844	-0.178351	-0.1539	2.16692	1.41521	2.57225	0.407019	0.747026	0.999712	0.68173	0.838289	0.879721	2.22e-05	0.00201864	2.66e-06
NZ_CP011454.1	264960	265394	+	CDS	GEMMAAP_RS20805	WP_026849092.1	hypothetical protein	6.95473	0.522891	-0.308298	-0.316948	0.178579	-0.216315	-0.0965531	1.0605	0.700391	1.11897	0.0578996	0.541733	0.560128	0.634549	0.504624	0.813537	2.67e-06	0.000679439	1.2e-06
NZ_CP011454.1	3074142	3074435	+	CDS	GEMMAAP_RS13040	WP_026849428.1	hypothetical protein	9.01131	0.52182	0.0606116	0.236634	0.216998	0.146278	0.157204	-0.122304	-0.74612	-0.0334086	0.0376422	0.941504	0.629512	0.477113	0.64546	0.633438	0.475379	0.00015012	0.852184
NZ_CP011454.1	1158017	1158970	-	CDS	GEMMAAP_RS04775	WP_145979008.1	hypothetical protein	6.5911	0.521288	0.317426	0.0578846	0.143009	0.0695783	-0.0159697	0.9221	0.119125	0.926674	0.0246655	0.380035	0.980559	0.81117	0.836062	0.979101	1.51e-06	0.472703	1.44e-06
NZ_CP011454.1	3836188	3836862	-	CDS	GEMMAAP_RS16220	WP_145979188.1	hypothetical protein	9.55955	0.521062	-1.41574	-0.421127	-0.168231	-0.814669	-0.618277	-0.547982	-1.44088	-1.66544	0.295314	0.0050035	0.652637	0.80438	0.105777	0.240743	0.0888852	0.000170547	1.91e-05
NZ_CP011454.1	3218198	3218977	+	CDS	GEMMAAP_RS13620	WP_053333752.1	TetR family transcriptional regulator	4.31803	0.519758	0.725401	0.694577	0.185843	0.382465	0.326257	1.4874	1.13221	1.44288	0.17619	0.0952206	0.27358	0.736425	0.350601	0.454026	5.65e-07	5.3e-05	1.2e-06
NZ_CP011454.1	2986243	2986467	+	CDS	GEMMAAP_RS12660	WP_202969128.1	YbdD/YjiX family protein	6.28271	0.519138	0.119312	-0.125131	0.0321664	-0.0757704	0.00786157	0.794393	0.609511	0.736429	0.11798	0.914728	0.934372	0.96781	0.882145	0.996617	0.000697192	0.00865405	0.00155046
NZ_CP011454.1	1369998	1371116	-	CDS	GEMMAAP_RS05680	WP_026849880.1	NAD-dependent epimerase/dehydratase family protein	6.93041	0.518094	0.0592197	-0.0816047	-0.00589893	-0.112288	0.0669992	0.934709	0.382714	0.423254	0.027809	0.941504	0.940968	0.994121	0.714953	0.863194	1.72e-06	0.0214179	0.00925187
NZ_CP011454.1	2791300	2791809	-	CDS	GEMMAAP_RS11855	WP_026849605.1	asparaginase domain-containing protein	4.67909	0.517408	-0.369526	0.175129	0.478965	0.374167	0.200946	0.767538	1.68274	1.24687	0.106213	0.515022	0.992231	0.203858	0.268746	0.61766	0.000437809	1.74e-08	1.02e-06
NZ_CP011454.1	2039655	2040008	-	CDS	GEMMAAP_RS20525	WP_026850617.1	roadblock/LC7 domain-containing protein	4.7219	0.517059	0.228954	0.145194	0.582511	0.117581	0.146255	0.671346	0.0270872	0.893993	0.132017	0.782377	0.922233	0.149649	0.800059	0.756112	0.00320411	0.92041	0.000250587
NZ_CP011454.1	4390617	4391384	-	CDS	GEMMAAP_RS18505	WP_026850914.1	L%2CD-transpeptidase	2.17771	0.516854	-0.153288	-0.095518	0.0904586	-0.090993	0.0171317	0.159062	0.171743	-0.405271	0.400459	0.941504	0.992231	0.940081	0.935906	0.996617	0.666133	0.678821	0.327317
NZ_CP011454.1	1181303	1181548	+	CDS	GEMMAAP_RS04880	WP_026850011.1	hypothetical protein	8.03861	0.516315	0.128513	-0.0160653	0.0523902	0.111613	0.224543	-0.145943	-0.526469	-0.214389	0.104058	0.895311	0.999712	0.921142	0.797144	0.572641	0.493753	0.0184439	0.305901
NZ_CP011454.1	496042	497004	-	CDS	GEMMAAP_RS02160	WP_026849237.1	hypothetical protein	9.45346	0.515434	-0.607159	-0.310263	-0.802698	-0.766162	-0.803457	-0.78471	-1.51994	-1.73569	0.416398	0.614907	0.854737	0.245611	0.24744	0.227412	0.0561161	0.00118132	0.00023451
NZ_CP011454.1	3447352	3448338	-	CDS	GEMMAAP_RS14610	WP_158514878.1	hypothetical protein	9.00518	0.513769	-0.684873	-0.350913	0.0262511	-0.429875	-0.424766	-0.234209	-0.281653	-0.587614	0.0847204	0.0415139	0.510086	0.969348	0.175237	0.19074	0.238149	0.176391	0.00455636
NZ_CP011454.1	2864276	2866072	+	CDS	GEMMAAP_RS12130	WP_026849566.1	FAD-dependent oxidoreductase	7.16962	0.511041	-0.122437	-0.0172958	0.0541458	-0.339304	-0.0315134	1.6624	0.937622	1.18602	0.035264	0.864082	0.999712	0.898345	0.193771	0.94885	3.62e-10	4.58e-06	6.93e-08
NZ_CP011454.1	1788581	1788994	+	CDS	GEMMAAP_RS07430	WP_145979046.1	hypothetical protein	7.81006	0.510327	-0.066074	0.26918	0.462836	0.121205	0.215533	0.416121	0.200814	0.686194	0.0503026	0.941504	0.595094	0.129353	0.724865	0.495624	0.0196532	0.277571	0.000348537
NZ_CP011454.1	4053477	4053833	+	CDS	GEMMAAP_RS17095	WP_026848241.1	nuclear transport factor 2 family protein	4.35826	0.510217	0.102474	0.0569839	0.549843	0.161732	0.301119	0.913846	0.957922	1.25628	0.189216	0.938883	0.992231	0.22442	0.74306	0.503027	0.000493976	0.000496609	1.41e-05
NZ_CP011454.1	3273019	3273597	-	CDS	GEMMAAP_RS13860	WP_145979147.1	hypothetical protein	2.05767	0.509657	0.107307	-0.52849	-0.0781483	0.106709	-0.097067	0.711815	0.176116	0.628599	0.343896	0.942652	0.728214	0.942606	0.927676	0.916612	0.020786	0.621237	0.0553106
NZ_CP011454.1	2632174	2633202	-	CDS	GEMMAAP_RS11225	WP_026849699.1	LacI family transcriptional regulator	3.70344	0.508797	0.0506581	0.139259	0.325629	0.257615	0.000287414	0.431672	0.493417	0.617841	0.123876	0.959768	0.927238	0.434806	0.48494	0.999579	0.0377346	0.0247305	0.0053674
NZ_CP011454.1	3394199	3394309	-	CDS	GEMMAAP_RS20340	WP_158514875.1	hypothetical protein	4.18614	0.508418	0.28253	0.771315	0.271863	0.0237987	-0.161187	2.48193	2.00901	2.79741	0.487572	0.891095	0.594286	0.7899	0.996447	0.889376	1.68e-06	5.1e-05	3.49e-07
NZ_CP011454.1	170406	171179	-	CDS	GEMMAAP_RS00760	WP_053333885.1	LytTR family DNA-binding domain-containing protein	3.06673	0.50666	0.276219	0.212779	0.187559	0.578199	0.362269	0.25729	0.655808	0.455296	0.29181	0.811808	0.916818	0.782957	0.212964	0.492005	0.367207	0.0285016	0.12623
NZ_CP011454.1	3225572	3227344	-	CDS	GEMMAAP_RS13660	WP_026848746.1	hypothetical protein	8.81317	0.505733	-0.624386	-0.475726	-0.198854	-0.472105	-0.495083	-0.444054	-0.992019	-1.14096	0.141344	0.155031	0.406545	0.656619	0.197885	0.186155	0.054399	0.00019607	2.2e-05
NZ_CP011454.1	4570873	4571244	+	CDS	GEMMAAP_RS19245	WP_026851024.1	phage holin family protein	4.62888	0.505665	0.188636	0.0879991	-0.1128	-0.0551992	-0.0543116	2.00657	0.98129	1.96315	0.151487	0.849683	0.98462	0.8444	0.935255	0.936628	1.86e-09	0.000135213	2.86e-09
NZ_CP011454.1	4392726	4394159	+	CDS	GEMMAAP_RS18515	WP_145979237.1	hypothetical protein	6.09373	0.503589	0.223343	-0.222359	-0.136159	-0.0023075	-0.0842582	0.520659	0.406605	0.184334	0.141262	0.790303	0.823223	0.790027	0.999236	0.884528	0.0212585	0.0811109	0.415694
NZ_CP011454.1	2826503	2829286	+	CDS	GEMMAAP_RS12000	WP_026849583.1	TonB-dependent receptor	4.4285	0.502547	0.276359	-0.0775127	-0.0823253	0.394004	0.275042	0.434315	0.124117	0.373307	0.11798	0.681225	0.98462	0.882832	0.238461	0.457517	0.0339087	0.584538	0.0749931
NZ_CP011454.1	4635	5537	+	CDS	GEMMAAP_RS00030	WP_026848934.1	helix-turn-helix domain-containing protein	2.18641	0.5009	-0.049159	0.281113	-0.206091	0.279396	0.341502	0.545602	0.00565793	0.926327	0.261053	0.967346	0.847642	0.758368	0.569632	0.488172	0.0364316	0.987593	0.0013823
NZ_CP011454.1	2973039	2973872	-	CDS	GEMMAAP_RS12610	WP_158514848.1	UbiA family prenyltransferase	5.4712	0.500326	0.405931	0.94518	0.564982	0.209309	0.625211	0.64137	0.0389807	0.800352	0.153688	0.498945	0.0528703	0.17419	0.626273	0.0991531	0.00593649	0.886133	0.00107743
NZ_CP011454.1	3031035	3031580	-	CDS	GEMMAAP_RS12830	WP_043580646.1	ATP-dependent protease subunit HslV	4.80915	0.499517	0.228753	0.132102	0.583064	0.437074	0.302489	1.06364	0.890235	1.26382	0.0960986	0.73864	0.916818	0.0995397	0.153461	0.368535	3.3e-06	6.97e-05	3.1e-07
NZ_CP011454.1	2200471	2201064	-	CDS	GEMMAAP_RS09280	WP_026850781.1	Spy/CpxP family protein refolding chaperone	8.18945	0.499099	-0.000423146	0.333427	-0.379927	-0.507792	-0.397113	-1.89678	-1.97413	-2.02042	0.463424	0.999855	0.854737	0.652716	0.496616	0.634787	0.000195542	0.000209211	0.000106979
NZ_CP011454.1	3211786	3212355	-	CDS	GEMMAAP_RS13585	WP_053333754.1	redoxin domain-containing protein	4.38811	0.49381	-0.224538	-0.0590936	-0.312031	-0.325746	-0.278546	-0.93328	-1.6031	-1.72432	0.151487	0.790303	0.992231	0.490933	0.390915	0.495624	0.00020385	5.93e-07	2.16e-07
NZ_CP011454.1	1013266	1016352	+	CDS	GEMMAAP_RS04230	WP_075071422.1	efflux RND transporter permease subunit	2.24702	0.491245	-0.235564	0.0991515	0.130089	-0.444926	-0.288468	-0.322448	-0.334769	-0.189568	0.352204	0.874002	0.992231	0.885791	0.44385	0.666953	0.315186	0.344906	0.597619
NZ_CP011454.1	408454	408693	+	CDS	GEMMAAP_RS20225	WP_145978950.1	hypothetical protein	5.35666	0.490568	0.22935	-0.000732252	0.072884	0.165407	0.238005	2.1247	1.48593	2.27922	0.112073	0.741517	0.999712	0.891572	0.666549	0.510349	9.89e-11	6.38e-08	3.9e-11
NZ_CP011454.1	742035	742376	-	CDS	GEMMAAP_RS03210	WP_202969214.1	CoA-binding protein	5.26058	0.490531	0.0805952	0.322461	0.263222	0.13345	0.384168	-0.603784	-0.406022	-0.632816	0.0781219	0.931739	0.564863	0.455506	0.707344	0.196049	0.00193015	0.0366103	0.00186045
NZ_CP011454.1	1178497	1178814	+	CDS	GEMMAAP_RS04865	WP_043581059.1	YtxH domain-containing protein	9.6473	0.489522	-0.701304	0.103562	0.124603	-0.143392	-0.363584	-0.297957	-0.842847	-1.07318	0.327753	0.337835	0.981434	0.869041	0.834156	0.532923	0.35145	0.0138286	0.00182369
NZ_CP011454.1	3714571	3715584	-	CDS	GEMMAAP_RS15735	WP_026848446.1	SPFH domain-containing protein	7.15401	0.488755	0.013518	-0.0136656	-0.0494252	-0.0896011	-0.184793	0.171893	0.097523	-0.236805	0.0781219	0.991568	0.999712	0.918117	0.818779	0.607413	0.350551	0.632728	0.197277
NZ_CP011454.1	3898739	3900670	+	CDS	GEMMAAP_RS16480	WP_026848328.1	propionyl-CoA synthetase	5.1736	0.488503	0.256409	0.0919482	0.203064	0.108917	0.234502	1.16786	0.0435576	0.422329	0.0246655	0.49287	0.962711	0.463976	0.696124	0.34052	8.06e-09	0.857523	0.00484387
NZ_CP011454.1	2580014	2580688	-	CDS	GEMMAAP_RS10960	WP_026849735.1	YceH family protein	3.68629	0.485265	-0.23851	-0.481177	-0.347037	-0.113167	-0.222487	-0.923352	-0.608081	-0.941108	0.111096	0.736802	0.436179	0.369922	0.779499	0.543806	5.47e-05	0.00520303	9.41e-05
NZ_CP011454.1	3594739	3595227	+	CDS	GEMMAAP_RS15200	WP_202969146.1	arsenic resistance N-acetyltransferase ArsN2	4.02309	0.481916	0.33465	0.0839335	0.295997	0.139453	0.0451446	1.02894	0.674955	1.17894	0.188157	0.640075	0.985589	0.533082	0.772149	0.950307	5.91e-05	0.00621088	1.35e-05
NZ_CP011454.1	1092171	1092671	-	CDS	GEMMAAP_RS04535	WP_026850068.1	hypothetical protein	6.88028	0.479915	-0.205426	-0.315894	0.220838	-0.232975	-0.252351	0.253685	-0.165811	-0.237638	0.0886808	0.758158	0.563872	0.541151	0.469562	0.452101	0.171257	0.403988	0.202413
NZ_CP011454.1	3186768	3187628	+	CDS	GEMMAAP_RS20330	WP_158514862.1	alpha/beta hydrolase	5.4803	0.478363	-0.124851	-0.028607	0.101293	0.0922118	0.00295754	0.773439	0.12935	0.945944	0.0609691	0.864314	0.999594	0.792775	0.787678	0.997706	4.56e-05	0.472703	3.42e-06
NZ_CP011454.1	3794021	3794761	+	CDS	GEMMAAP_RS16030	WP_158514894.1	alpha/beta fold hydrolase	4.9174	0.478232	0.226398	1.70477	-0.0436332	0.0182248	-0.0211371	0.078554	-0.557042	-0.595442	0.60395	0.934405	0.18009	0.985329	0.998434	0.996617	0.888843	0.333852	0.286072
NZ_CP011454.1	313074	314936	+	CDS	GEMMAAP_RS01395	WP_026849131.1	hypothetical protein	5.576	0.477872	0.0484996	0.197211	-0.825126	0.0847859	0.063048	0.111518	2.28471	0.58924	0.765161	0.994826	0.992231	0.652999	0.981948	0.987018	0.894121	0.00863296	0.465166
NZ_CP011454.1	1148864	1149475	-	CDS	GEMMAAP_RS04740	WP_026850036.1	dephospho-CoA kinase	4.38273	0.476648	0.286118	0.260363	0.211761	0.303909	0.257923	0.457278	0.318452	0.935287	0.11798	0.623684	0.725043	0.607358	0.354003	0.46253	0.0187791	0.115741	3.12e-05
NZ_CP011454.1	4385088	4386947	-	CDS	GEMMAAP_RS18485	WP_053334580.1	hypothetical protein	1.5738	0.475659	0.127035	0.270006	0.379075	0.0925121	-0.130993	-0.24348	-0.584028	-0.67643	0.469844	0.944216	0.932215	0.656619	0.936996	0.902539	0.535593	0.1822	0.135012
NZ_CP011454.1	3962094	3962483	-	CDS	GEMMAAP_RS16725	WP_026848294.1	glyoxalase/bleomycin resistance/dioxygenase family protein	5.14712	0.475609	0.0406275	-0.157008	-0.0631292	-0.110629	-0.0589664	0.120874	0.0104784	-0.315581	0.0642542	0.959659	0.848977	0.889948	0.742238	0.893916	0.477068	0.961642	0.0708676
NZ_CP011454.1	1344342	1345391	-	CDS	GEMMAAP_RS05620	WP_053334220.1	glycerophosphodiester phosphodiesterase	2.36432	0.475153	-0.246457	-0.362743	0.223818	0.171469	-0.148949	0.983834	0.733996	0.878705	0.351952	0.863696	0.840507	0.753398	0.786775	0.842816	0.00122451	0.0188106	0.00585861
NZ_CP011454.1	1443950	1444690	-	CDS	GEMMAAP_RS05965	WP_075071447.1	alpha/beta hydrolase	4.89831	0.474526	0.0763918	0.161966	-0.0174648	0.247488	0.00873672	0.330929	-0.244587	0.217795	0.1655	0.941504	0.90214	0.985588	0.532203	0.996617	0.132223	0.305174	0.334354
NZ_CP011454.1	4331993	4332535	-	CDS	GEMMAAP_RS18255	WP_026850879.1	YaeQ family protein	4.69577	0.47319	-0.159216	-0.137841	0.248224	0.364995	0.274699	-0.125604	0.307974	-0.350866	0.0781219	0.829225	0.999712	0.465182	0.191899	0.366055	0.475773	0.0893628	0.0555043
NZ_CP011454.1	2753840	2755021	+	CDS	GEMMAAP_RS11725	WP_026849628.1	hypothetical protein	5.62426	0.470082	0.312657	0.284821	0.197106	-0.136528	0.300762	0.981286	1.04667	0.71844	0.148305	0.619511	0.693232	0.65709	0.744088	0.419956	4.12e-05	3.15e-05	0.00148914
NZ_CP011454.1	310901	311380	+	CDS	GEMMAAP_RS01380	WP_026849128.1	cupin domain-containing protein	4.80756	0.46957	0.243446	0.753626	-0.510782	0.562079	0.0462109	1.77731	4.36428	2.83533	0.795532	0.947784	0.86309	0.822281	0.730479	0.9942	0.0264194	2.43e-05	0.00115261
NZ_CP011454.1	455161	455667	+	CDS	GEMMAAP_RS02010	WP_053333948.1	CIA30 family protein	3.57512	0.469136	0.604493	0.969399	0.232237	0.617044	0.552735	-0.0430356	-0.534797	-0.142465	0.238049	0.263999	0.0890995	0.665061	0.11367	0.174775	0.870495	0.0507951	0.604774
NZ_CP011454.1	4216120	4216551	+	CDS	GEMMAAP_RS17770	WP_026848146.1	DUF4281 domain-containing protein	3.58938	0.468369	-0.318465	-0.610691	0.120527	-0.070579	-0.151392	0.601771	0.853927	0.550231	0.274379	0.741517	0.520154	0.862205	0.927534	0.800934	0.0215279	0.00255523	0.0421078
NZ_CP011454.1	2484178	2484636	+	CDS	GEMMAAP_RS10595	WP_053334170.1	Hsp20/alpha crystallin family protein	3.79422	0.466448	-0.13583	-0.174417	0.0479424	-0.345605	-0.315007	0.267893	0.351845	0.424252	0.343896	0.931656	0.947486	0.965476	0.530576	0.603586	0.366696	0.264827	0.163041
NZ_CP011454.1	4534269	4534988	+	CDS	GEMMAAP_RS19090	WP_053334615.1	sulfite exporter TauE/SafE family protein	0.694608	0.465925	-0.205358	0.193393	-0.232101	0.218912	0.0940397	0.622705	0.609653	0.484595	0.73594	0.949411	0.992231	0.913886	0.900226	0.966024	0.319655	0.382149	0.503897
NZ_CP011454.1	311377	312072	+	CDS	GEMMAAP_RS01385	WP_026849129.1	hypothetical protein	5.05879	0.464374	0.403937	0.62553	-0.901906	0.598046	0.114479	1.69865	4.04733	2.37118	0.802918	0.928979	0.912806	0.673403	0.717947	0.966527	0.0408255	0.000104469	0.00686063
NZ_CP011454.1	3518480	3519193	+	CDS	GEMMAAP_RS14845	WP_053333691.1	TVP38/TMEM64 family protein	4.79335	0.463891	0.255054	0.247733	-0.0739342	0.112953	-0.174201	1.11722	0.500377	1.14895	0.0945891	0.64064	0.701337	0.913635	0.751447	0.625507	5.54e-07	0.00826805	4.48e-07
NZ_CP011454.1	2358362	2358841	-	CDS	GEMMAAP_RS10025	WP_043581632.1	LEA type 2 family protein	6.4522	0.461819	-0.373578	-0.326201	0.00621217	-0.301658	-0.289199	-0.351406	-0.721269	-1.0454	0.154777	0.517819	0.629512	0.996306	0.404544	0.452101	0.101795	0.00240004	4.32e-05
NZ_CP011454.1	1047341	1047835	-	CDS	GEMMAAP_RS04360	WP_026850091.1	LuxR C-terminal-related transcriptional regulator	5.83051	0.460974	0.0854721	0.302467	0.304738	0.188904	-0.0569413	1.15971	0.697749	1.3459	0.154526	0.940023	0.669395	0.460242	0.636897	0.925222	4.22e-06	0.00229779	5.22e-07
NZ_CP011454.1	4483717	4484298	+	CDS	GEMMAAP_RS18880	WP_026850969.1	hypothetical protein	4.91399	0.460548	0.0538788	0.215671	0.110549	-0.123479	0.101585	0.342295	0.136099	0.26844	0.176841	0.959182	0.833899	0.838422	0.786775	0.849719	0.119009	0.576797	0.232113
NZ_CP011454.1	4282174	4282674	-	CDS	GEMMAAP_RS18060	WP_053333529.1	2'-5' RNA ligase family protein	3.44772	0.45979	0.0606619	-0.265122	0.177979	-0.043487	-0.0288871	0.372495	0.0857036	0.49264	0.247642	0.965706	0.86309	0.75453	0.956014	0.977036	0.122908	0.761273	0.0516955
NZ_CP011454.1	2531826	2532536	-	CDS	GEMMAAP_RS10780	WP_026849762.1	hypothetical protein	8.3019	0.45943	-0.238446	-0.203274	-0.324513	-0.539291	-0.727788	0.735701	0.85988	1.12603	0.507678	0.911821	0.949126	0.714122	0.467067	0.328377	0.0895918	0.0587046	0.0121356
NZ_CP011454.1	4460067	4460540	-	CDS	GEMMAAP_RS20695	WP_026850956.1	DUF1269 domain-containing protein	6.34302	0.456576	0.139817	0.267993	0.252908	0.167812	0.240091	1.86018	1.38075	1.77935	0.0699096	0.844866	0.605839	0.424699	0.57493	0.41336	6.79e-11	1.74e-08	1.4e-10
NZ_CP011454.1	4685310	4685933	-	CDS	GEMMAAP_RS19750	WP_082821530.1	G/U mismatch-specific DNA glycosylase	6.2861	0.456382	-0.534037	0.0712297	0.242249	-0.401518	-0.333224	0.249447	-0.198907	0.371809	0.101514	0.120711	0.976646	0.491599	0.171744	0.27749	0.167966	0.305397	0.0430473
NZ_CP011454.1	1734357	1735268	+	CDS	GEMMAAP_RS07195	WP_026850424.1	cyanophycinase	5.42796	0.455829	0.335036	0.563731	0.367757	0.0762552	0.346521	0.806431	0.609271	1.02547	0.0454607	0.316391	0.0890995	0.178041	0.808867	0.151369	5.07e-06	0.000301734	1.62e-07
NZ_CP011454.1	3296766	3298850	-	CDS	GEMMAAP_RS13975	WP_082821336.1	heavy metal translocating P-type ATPase	2.23714	0.455701	0.711413	0.807307	0.997661	0.552375	0.675063	1.16898	1.45413	1.55478	0.540677	0.517818	0.564863	0.179354	0.434736	0.343629	0.00345261	0.000726446	0.000345658
NZ_CP011454.1	3535559	3536524	-	CDS	GEMMAAP_RS14935	WP_145979165.1	hypothetical protein	6.96632	0.455536	-0.65798	-0.497985	-0.418741	-0.637502	-0.844644	-0.999912	-1.6184	-1.80316	0.34388	0.361769	0.573035	0.463018	0.196155	0.101711	0.00242583	3.6e-05	6.35e-06
NZ_CP011454.1	1853895	1854383	-	CDS	GEMMAAP_RS07665	WP_075071459.1	DUF4442 domain-containing protein	4.27048	0.455097	-0.0416788	0.138239	0.0521205	-0.124608	0.195137	0.97608	0.899454	0.983667	0.123876	0.963085	0.913643	0.920708	0.74306	0.59613	8.48e-06	4.78e-05	1.09e-05
NZ_CP011454.1	1587486	1587620	-	CDS	GEMMAAP_RS06600	WP_026850329.1	light-harvesting protein	9.92594	0.454893	0.437835	0.366297	0.998267	1.03287	0.789252	0.780274	1.43135	0.794833	0.125289	0.324903	0.480746	0.00386185	0.000416136	0.0267875	0.000329711	2.04e-07	0.000259269
NZ_CP011454.1	4281240	4281617	-	CDS	GEMMAAP_RS18050	WP_026848100.1	helix-turn-helix domain-containing protein	3.9926	0.454647	0.0812117	-0.029742	-0.115723	0.304231	0.0749548	0.420637	0.420384	0.771662	0.231451	0.941504	0.999712	0.847538	0.457983	0.907384	0.0716786	0.0877995	0.00223574
NZ_CP011454.1	4388724	4389185	+	CDS	GEMMAAP_RS18495	WP_053334581.1	Rieske (2Fe-2S) protein	4.34335	0.453871	0.000223181	-0.193515	0.0862634	-0.0237202	0.140897	1.00544	0.660841	0.882876	0.260522	0.999855	0.910928	0.901363	0.985467	0.802443	0.000202988	0.0122325	0.00104784
NZ_CP011454.1	94124	96154	+	CDS	GEMMAAP_RS00390	WP_158514667.1	methyl-accepting chemotaxis protein	2.55933	0.45164	0.41277	0.11045	0.541258	0.130862	0.418337	1.02002	0.481201	1.19749	0.399358	0.704858	0.992231	0.387386	0.861496	0.471461	0.00148872	0.148075	0.000510761
NZ_CP011454.1	140580	140822	+	CDS	GEMMAAP_RS00610	WP_043580084.1	hypothetical protein	4.35514	0.451511	-0.377069	-0.278397	0.251097	0.300284	-0.0340531	0.396149	-0.0053196	0.442254	0.18845	0.541733	0.759951	0.577882	0.420403	0.960753	0.0677195	0.985525	0.0481681
NZ_CP011454.1	3937684	3939003	-	CDS	GEMMAAP_RS16630	WP_053333600.1	hypothetical protein	4.5451	0.451236	0.0114577	-0.131888	-0.681492	-0.212459	-0.165978	0.375596	-0.108483	-0.0940748	0.119184	0.994826	0.916818	0.0688979	0.530451	0.659071	0.0436306	0.602644	0.63757
NZ_CP011454.1	3830089	3830661	-	CDS	GEMMAAP_RS16185	WP_202969153.1	nuclear transport factor 2 family protein	4.23376	0.450175	-0.0926785	-0.261266	-0.494867	-0.0470342	-0.306445	0.820567	0.728656	0.572741	0.278326	0.941504	0.840789	0.335741	0.953087	0.527607	0.00207413	0.00756334	0.0302961
NZ_CP011454.1	215769	216626	-	CDS	GEMMAAP_RS00945	WP_043580358.1	3-mercaptopyruvate sulfurtransferase	5.16628	0.449353	-0.0582124	0.0785762	0.0883643	-0.0360604	0.0621033	0.89305	0.646224	0.806581	0.0552472	0.941504	0.992231	0.917421	0.937041	0.872517	1.73e-06	0.000217299	9.53e-06
NZ_CP011454.1	4536167	4536439	+	CDS	GEMMAAP_RS19105	WP_026851001.1	zf-HC2 domain-containing protein	2.42268	0.448934	0.348632	0.582284	0.483918	-0.014286	0.248263	0.691414	0.234398	0.620371	0.401444	0.772261	0.599741	0.454138	0.996924	0.710381	0.0262841	0.502476	0.05941
NZ_CP011454.1	1404845	1405348	-	CDS	GEMMAAP_RS05830	WP_026849854.1	hypothetical protein	8.47941	0.447406	-0.773523	-0.353618	-0.0113833	-0.450771	-0.659715	0.0285415	-0.0846683	-0.71528	0.358281	0.257897	0.7273	0.994121	0.390445	0.196049	0.932291	0.81332	0.0246511
NZ_CP011454.1	2932146	2932922	-	CDS	GEMMAAP_RS12430	WP_082821284.1	ubiquinone/menaquinone biosynthesis methyltransferase	6.01415	0.447026	-0.0625773	-0.132716	0.210622	-0.119623	0.00780713	0.702511	0.421597	0.715678	0.0767719	0.941504	0.875071	0.518639	0.710788	0.996617	0.000121447	0.0155675	0.000112989
NZ_CP011454.1	4429468	4430052	+	CDS	GEMMAAP_RS18655	WP_053334590.1	rhomboid family intramembrane serine protease	4.99041	0.446854	0.199427	0.385508	0.0821971	-0.220951	-0.160097	1.44058	0.853044	1.68999	0.265672	0.860884	0.656783	0.90734	0.648541	0.773537	2.05e-06	0.00178987	2.09e-07
NZ_CP011454.1	2923098	2924177	+	CDS	GEMMAAP_RS12385	WP_053334072.1	M48 family metallopeptidase	8.589	0.446604	-0.19961	-0.0646585	-0.091972	-0.180604	-0.398942	0.642857	0.801051	0.615427	0.405483	0.902494	0.992231	0.915699	0.799419	0.522581	0.0640849	0.0282506	0.0730912
NZ_CP011454.1	150536	151003	+	CDS	GEMMAAP_RS00670	WP_043580087.1	AAC(3)-I family aminoglycoside N-acetyltransferase	5.86914	0.444259	-0.468072	-0.412152	0.140984	-0.16184	-0.268732	0.19255	0.375368	0.102521	0.232526	0.420672	0.595094	0.79313	0.732593	0.54319	0.41985	0.130477	0.681144
NZ_CP011454.1	157415	157651	-	CDS	GEMMAAP_RS00710	WP_043580088.1	type II toxin-antitoxin system Phd/YefM family antitoxin	5.22055	0.444226	0.30397	0.347095	0.278547	0.145302	-0.00129798	0.332382	-0.176536	0.627694	0.203613	0.670799	0.647749	0.534858	0.742911	0.999269	0.134293	0.467403	0.00713191
NZ_CP011454.1	4270550	4271869	-	CDS	GEMMAAP_RS18005	WP_043579300.1	AbgT family transporter	4.07772	0.443566	0.38816	0.392339	0.171816	0.247515	0.43497	0.789037	0.588987	1.0999	0.128952	0.3701	0.501058	0.667882	0.43746	0.146725	9.7e-05	0.00306951	1.46e-06
NZ_CP011454.1	2186723	2187388	-	CDS	GEMMAAP_RS19985	WP_158514794.1	ComF family protein	6.78475	0.442575	0.00818223	-0.0261566	0.279232	0.169493	0.128667	0.873953	0.47923	0.949281	0.0338864	0.995296	0.993197	0.259203	0.480907	0.63659	6.92e-07	0.00170845	1.91e-07
NZ_CP011454.1	2587304	2588212	-	CDS	GEMMAAP_RS10990	WP_053334144.1	cation diffusion facilitator family transporter	6.06181	0.441707	-0.195289	-0.179746	0.354335	0.0739688	0.277112	1.07876	0.50637	0.992765	0.0960986	0.751307	0.805839	0.261812	0.846854	0.358238	7.42e-07	0.00632485	2.78e-06
NZ_CP011454.1	115030	115284	+	CDS	GEMMAAP_RS00480	WP_158514669.1	helix-turn-helix domain-containing protein	5.69679	0.441366	0.229752	0.367952	0.155854	-0.147196	-0.098309	0.713546	0.0253436	0.980989	0.213104	0.789883	0.61214	0.758044	0.744088	0.863194	0.00271417	0.927748	0.00012736
NZ_CP011454.1	1148394	1148780	-	CDS	GEMMAAP_RS04735	WP_026850037.1	glycine cleavage system protein GcvH	7.70366	0.440993	0.106346	0.20239	0.184087	0.148037	0.0554296	0.393631	0.0781563	0.430346	0.0934728	0.895311	0.723928	0.58168	0.652473	0.903544	0.0257528	0.688194	0.0153698
NZ_CP011454.1	1583032	1583673	-	CDS	GEMMAAP_RS06570	WP_026850326.1	VWA domain-containing protein	5.85399	0.439732	0.316555	0.199039	-0.0313355	0.156793	0.428547	-0.730112	-0.490958	-1.02079	0.151965	0.588668	0.812096	0.965476	0.687388	0.192292	0.000852386	0.0226735	3.32e-05
NZ_CP011454.1	1046682	1047236	-	CDS	GEMMAAP_RS04355	WP_026850092.1	DUF4199 domain-containing protein	4.54463	0.43861	0.398507	0.35943	0.729112	0.356865	0.305266	0.889323	0.979579	1.06748	0.376727	0.694434	0.768568	0.181741	0.504788	0.607413	0.0041596	0.00277449	0.00107393
NZ_CP011454.1	3720468	3721268	-	CDS	GEMMAAP_RS15760	WP_026848441.1	signal peptidase I	6.31641	0.438376	0.0490582	-0.146365	-0.213752	-0.155794	-0.192133	0.338603	0.298715	0.373836	0.0864531	0.947784	0.850633	0.523986	0.62121	0.535795	0.0445851	0.0880534	0.028595
NZ_CP011454.1	4677235	4677741	-	CDS	GEMMAAP_RS19715	WP_026848904.1	hypothetical protein	5.70909	0.437581	0.168097	0.241216	0.248068	-0.0664405	0.143725	1.09643	0.530889	0.925966	0.107775	0.810395	0.686835	0.469319	0.86925	0.682262	6.93e-07	0.00497084	9.38e-06
NZ_CP011454.1	154684	156828	-	CDS	GEMMAAP_RS00700	WP_082820946.1	hypothetical protein	8.00507	0.436449	1.16239	2.20444	0.573182	0.149544	-0.0236916	5.11614	5.68878	4.93157	0.779286	0.613273	0.204163	0.737021	0.948926	0.996617	5.55e-06	3.65e-06	7.33e-06
NZ_CP011454.1	2837974	2838585	-	CDS	GEMMAAP_RS12035	WP_026849579.1	DUF47 family protein	5.74258	0.434805	-0.0429192	-0.0450623	0.00977547	0.136858	0.0241179	0.332435	0.0943352	0.375863	0.083031	0.953828	0.992231	0.990241	0.664853	0.998911	0.0425646	0.602644	0.0247775
NZ_CP011454.1	3558192	3559082	-	CDS	GEMMAAP_RS15060	WP_026848538.1	anti-sigma factor	4.24651	0.434177	-0.070528	0.0704882	-0.153109	0.0648463	0.236905	-0.365507	-0.265747	-0.411548	0.137702	0.941504	0.981855	0.714682	0.883749	0.482205	0.0532063	0.182724	0.0393618
NZ_CP011454.1	3432427	3433593	+	CDS	GEMMAAP_RS14540	WP_026848610.1	thiolase family protein	6.7948	0.433497	0.390025	0.764553	0.242334	0.209205	0.360976	0.0413177	0.321305	0.257089	0.128952	0.372033	0.0419887	0.495947	0.530576	0.240743	0.833849	0.100263	0.169622
NZ_CP011454.1	3620592	3621620	-	CDS	GEMMAAP_RS15305	WP_026848501.1	LLM class flavin-dependent oxidoreductase	5.30326	0.433165	0.14728	0.376535	0.150945	0.0796896	0.23477	1.3371	0.850452	1.40375	0.0846455	0.829225	0.418372	0.658898	0.818779	0.41621	7.53e-09	1.49e-05	3.99e-09
NZ_CP011454.1	117098	117652	-	CDS	GEMMAAP_RS00495	WP_026849001.1	hypothetical protein	4.84508	0.433051	0.141616	0.0690813	0.503343	0.358408	0.552254	0.869725	0.708539	1.01662	0.316704	0.91699	0.992231	0.302386	0.429934	0.202101	0.00173567	0.0115701	0.0004621
NZ_CP011454.1	3500140	3500472	+	CDS	GEMMAAP_RS14795	WP_053333695.1	PadR family transcriptional regulator	3.28863	0.430649	0.298215	0.0714991	0.356109	0.387074	-0.0841495	1.68631	1.5815	1.49111	0.310424	0.741517	0.992231	0.4942	0.369299	0.903609	1.12e-07	7.12e-07	1.32e-06
NZ_CP011454.1	2838797	2839567	-	CDS	GEMMAAP_RS12040	WP_026849578.1	rhomboid family intramembrane serine protease	4.50555	0.430535	-0.2044	-0.183944	0.150455	-0.0771663	-0.327908	0.355321	-0.217987	0.367856	0.196857	0.81414	0.87489	0.759567	0.879382	0.395099	0.0928981	0.344277	0.0893074
NZ_CP011454.1	4281683	4282156	-	CDS	GEMMAAP_RS18055	WP_026848099.1	nuclear transport factor 2 family protein	4.49514	0.42992	0.17343	0.166622	0.132355	-0.0558808	-0.194044	0.822417	0.452589	0.850033	0.128952	0.811649	0.853048	0.748657	0.907226	0.58868	5.31e-05	0.0182529	4.77e-05
NZ_CP011454.1	3122569	3123114	-	CDS	GEMMAAP_RS13225	WP_026848813.1	carboxymuconolactone decarboxylase family protein	2.49246	0.429119	0.0651047	-0.227379	-0.246395	-0.0118224	0.051468	0.576433	0.869118	0.607165	0.350967	0.959814	0.916058	0.710078	0.996924	0.9942	0.0304727	0.00263207	0.0312644
NZ_CP011454.1	1640170	1641021	+	CDS	GEMMAAP_RS06800	WP_043581344.1	hypothetical protein	5.66477	0.429003	-0.328089	-0.20781	-0.0604093	-0.0933733	-0.328051	-0.0113373	-0.39674	-0.505907	0.0672623	0.3701	0.704628	0.959961	0.76622	0.196049	0.944886	0.0166489	0.00263279
NZ_CP011454.1	2839759	2841696	+	CDS	GEMMAAP_RS12045	WP_026849577.1	molecular chaperone DnaK	7.62826	0.427899	-0.0871847	-0.223954	-0.504533	-0.51999	-0.467904	-0.379533	-0.631098	-0.702733	0.227626	0.941504	0.794423	0.209538	0.158816	0.217683	0.101556	0.0107873	0.00389708
NZ_CP011454.1	792427	793077	-	CDS	GEMMAAP_RS03375	WP_053334019.1	TetR/AcrR family transcriptional regulator	6.41918	0.423914	0.0334924	0.88066	-0.198342	0.336947	-0.129039	1.07354	1.80676	1.69816	0.465883	0.986602	0.320281	0.812936	0.611026	0.88934	0.00433013	5.27e-05	6.45e-05
NZ_CP011454.1	495262	495720	-	CDS	GEMMAAP_RS02150	WP_053333965.1	MarR family transcriptional regulator	6.23698	0.423808	-0.640494	-0.745342	-0.942493	-0.949431	-0.865233	-0.186159	-0.573665	-0.850092	0.352644	0.342415	0.320281	0.0936147	0.0385316	0.0890871	0.524264	0.0614932	0.00648279
NZ_CP011454.1	243982	244908	-	CDS	GEMMAAP_RS01045	WP_026849075.1	UDP-N-acetylmuramate dehydrogenase	6.87609	0.423562	-0.0853948	0.120002	0.121062	-0.116022	-0.0192498	1.34504	0.915773	1.48273	0.148305	0.931656	0.919308	0.771713	0.76574	0.979357	1.53e-07	5.9e-05	3.21e-08
NZ_CP011454.1	1693997	1694626	-	CDS	GEMMAAP_RS07035	WP_053334360.1	50S ribosomal protein L25/general stress protein Ctc	6.93523	0.423176	-0.023262	-0.0695429	-0.346688	0.153025	-0.0554567	0.301991	0.6651	-0.0356902	0.0543258	0.970361	0.992231	0.182684	0.55904	0.883286	0.0412579	0.000108266	0.821339
NZ_CP011454.1	4262142	4262753	+	CDS	GEMMAAP_RS17965	WP_026848113.1	hypothetical protein	5.49423	0.422604	0.0529243	0.0306858	0.339387	0.309115	0.381326	0.801489	0.354813	0.703546	0.114981	0.947784	0.998807	0.288608	0.280797	0.182575	4.45e-05	0.0505707	0.000248409
NZ_CP011454.1	3394514	3394702	+	CDS	GEMMAAP_RS14390	WP_026848634.1	hypothetical protein	5.37227	0.422594	0.16776	0.136674	0.136651	0.0531714	-0.00647466	1.28231	0.980405	1.58914	0.218775	0.863696	0.928171	0.782985	0.935138	0.996617	1.53e-06	0.000105337	6.49e-08
NZ_CP011454.1	886443	887204	-	CDS	GEMMAAP_RS03730	WP_026850190.1	PEP-CTERM sorting domain-containing protein	9.32373	0.422521	0.255731	0.136024	-0.148473	-0.146199	-0.188959	0.607247	0.0027049	0.4072	0.0960986	0.60666	0.847642	0.654014	0.646404	0.543053	0.000866273	0.989964	0.017783
NZ_CP011454.1	3514863	3515363	-	CDS	GEMMAAP_RS14835	WP_026848568.1	hypothetical protein	8.14449	0.421868	-0.430776	0.241685	-0.308566	-0.457951	-0.599192	-0.0621414	-0.600501	-0.83911	0.395612	0.670433	0.86292	0.618856	0.390915	0.254591	0.852634	0.0725848	0.0112405
NZ_CP011454.1	4702468	4703982	-	CDS	GEMMAAP_RS19825	WP_053333842.1	sigma-54 dependent transcriptional regulator	2.91177	0.421835	-0.103836	-0.0234719	-0.0319284	0.0676742	0.0733745	0.715615	0.217244	0.783207	0.270101	0.934961	0.999712	0.999704	0.94783	0.90875	0.00258096	0.387116	0.00179039
NZ_CP011454.1	2771697	2772221	-	CDS	GEMMAAP_RS11790	WP_026849618.1	PepSY domain-containing protein	4.87153	0.420428	-0.0886558	-0.17129	-0.135594	-0.227533	-0.206668	0.131985	-0.718731	-0.0609945	0.185334	0.934405	0.87489	0.775042	0.540667	0.610907	0.522511	0.0019491	0.784256
NZ_CP011454.1	3835394	3835774	-	CDS	GEMMAAP_RS16215	WP_026848370.1	group II truncated hemoglobin	6.3506	0.419608	-0.176737	-0.20458	0.0583206	-0.10422	0.0661859	0.396671	-0.12802	0.512801	0.185334	0.840276	0.809954	0.915699	0.812157	0.903544	0.0551637	0.574763	0.0154474
NZ_CP011454.1	1395427	1396743	-	CDS	GEMMAAP_RS05800	WP_026849859.1	amino acid permease	3.68809	0.419199	-0.190304	0.0192023	0.20886	-0.0835433	0.142741	0.0351936	-0.1089	-0.0271482	0.262422	0.859825	0.999712	0.672336	0.879382	0.78166	0.886512	0.678821	0.917363
NZ_CP011454.1	1699554	1700474	-	CDS	GEMMAAP_RS07055	WP_202969217.1	ROK family protein	3.82562	0.418543	0.452843	0.131365	0.148662	-0.0471812	0.161439	0.419564	-0.329179	0.545618	0.235847	0.387562	0.941224	0.771713	0.945536	0.729918	0.0554727	0.169848	0.0177664
NZ_CP011454.1	1607692	1608927	-	CDS	GEMMAAP_RS06680	WP_026850342.1	ABC transporter permease	6.71592	0.417637	-0.482082	-0.223168	-0.452045	-0.366849	-0.554248	-0.528435	0.0630562	-1.03273	0.497403	0.708165	0.927238	0.546344	0.601302	0.41406	0.16499	0.887782	0.01114
NZ_CP011454.1	4188487	4189686	+	CDS	GEMMAAP_RS17670	WP_043579318.1	ABC transporter permease	5.87536	0.417447	-0.334008	-0.233768	-0.234801	-0.376139	-0.485744	0.712794	1.15839	0.648583	0.315347	0.705959	0.853048	0.672336	0.394971	0.270365	0.00761077	0.000145217	0.0153691
NZ_CP011454.1	4536666	4537256	-	CDS	GEMMAAP_RS19110	WP_026851002.1	DUF4126 domain-containing protein	5.90221	0.417405	-0.150092	0.381374	-9.33e-05	0.0628791	0.0644207	1.39904	1.43633	1.39587	0.487832	0.938883	0.801121	0.999974	0.956014	0.953224	0.000527293	0.000613463	0.000587914
NZ_CP011454.1	3047748	3048776	-	CDS	GEMMAAP_RS12900	WP_026849448.1	hypothetical protein	3.11092	0.417011	0.0229736	0.00461214	-0.259845	-0.430113	-0.311341	1.0339	0.352234	1.19255	0.375204	0.991568	0.999712	0.689309	0.390915	0.583939	0.000432903	0.235539	0.000129412
NZ_CP011454.1	4176943	4177581	+	CDS	GEMMAAP_RS17615	WP_043579324.1	peptide-methionine (S)-S-oxide reductase MsrA	6.36029	0.416324	-0.529956	-0.358488	-0.327346	-0.307209	-0.410854	-0.00798449	-0.381495	-0.80923	0.166259	0.179048	0.537139	0.37991	0.355498	0.208613	0.969988	0.067573	0.000310465
NZ_CP011454.1	1261571	1262374	-	CDS	GEMMAAP_RS05285	WP_026849946.1	inositol monophosphatase	3.98486	0.416291	0.238297	0.300993	-0.530224	-0.349246	-0.0895948	1.17324	0.618261	1.39589	0.242509	0.772548	0.726682	0.235836	0.369937	0.875011	5.54e-06	0.0083912	5.51e-07
NZ_CP011454.1	1692910	1693296	+	CDS	GEMMAAP_RS07025	WP_026850395.1	hypothetical protein	5.18972	0.415414	0.104586	0.157819	0.409424	-0.121899	0.399188	1.1491	1.02982	1.2476	0.189216	0.921211	0.886667	0.269451	0.772219	0.231542	2.71e-06	2.42e-05	9.76e-07
NZ_CP011454.1	270849	271313	+	CDS	GEMMAAP_RS01190	WP_202969175.1	hypothetical protein	6.92046	0.414246	0.0112885	-0.0622611	-0.222609	-0.445625	-0.399954	1.31055	1.39889	1.35521	0.322226	0.999855	0.992231	0.686812	0.318983	0.395099	3.13e-05	2.4e-05	1.98e-05
NZ_CP011454.1	474617	475156	+	CDS	GEMMAAP_RS02065	WP_053333957.1	YeeE/YedE family protein	2.21251	0.414241	-0.133426	-0.141603	0.0240888	-0.0494044	0.248355	0.570142	0.800255	0.200728	0.50187	0.941504	0.985589	0.990241	0.972978	0.746863	0.092743	0.0262852	0.603067
NZ_CP011454.1	2053220	2054533	+	CDS	GEMMAAP_RS08540	WP_053334438.1	transcription termination factor NusA	8.66447	0.413763	-0.272848	-0.00244258	0.0285364	0.252412	-0.0578699	-1.2197	-0.670044	-1.35523	0.0937638	0.541733	0.999712	0.957123	0.355498	0.889774	6.47e-08	0.000338405	1.17e-08
NZ_CP011454.1	3753201	3753854	-	CDS	GEMMAAP_RS15875	WP_026848425.1	VTT domain-containing protein	6.23981	0.413537	0.191282	0.108488	0.312996	0.19445	0.254332	0.244199	0.345169	0.238401	0.145334	0.782377	0.927238	0.364266	0.557708	0.44031	0.183856	0.0742402	0.198354
NZ_CP011454.1	4276786	4277532	+	CDS	GEMMAAP_RS18035	WP_026848102.1	tetratricopeptide repeat protein	3.71043	0.411853	-0.0015561	-0.248574	-0.674626	-0.274113	-0.622084	0.778315	0.335453	0.689744	0.210005	0.999855	0.798027	0.108615	0.45562	0.0932194	0.000384068	0.118853	0.00180334
NZ_CP011454.1	4364270	4365142	+	CDS	GEMMAAP_RS18390	WP_053334574.1	GNAT family N-acetyltransferase	2.44869	0.411554	0.0397447	0.153049	0.313533	-0.0180056	0.0844952	1.10687	0.258253	1.24846	0.400459	0.976442	0.981429	0.616457	0.994058	0.917668	0.000218123	0.403934	9.23e-05
NZ_CP011454.1	246166	247605	+	CDS	GEMMAAP_RS01060	WP_053333903.1	insulinase family protein	6.15376	0.409783	-0.414639	-0.16123	-0.361102	-0.45166	-0.484347	0.293294	-0.348271	-0.219176	0.164779	0.365708	0.862154	0.319704	0.144149	0.126701	0.127473	0.0864746	0.261193
NZ_CP011454.1	4569411	4570787	-	CDS	GEMMAAP_RS19240	WP_026851023.1	cardiolipin synthase B	5.98682	0.409396	-0.317016	0.0612801	0.306326	0.0983771	-0.0774939	0.429191	-0.0927693	0.639925	0.173162	0.57412	0.98832	0.399741	0.812711	0.875011	0.0294552	0.673732	0.00208015
NZ_CP011454.1	1029090	1030409	+	CDS	GEMMAAP_RS04285	WP_043581083.1	serine hydrolase	5.40376	0.409239	0.0671044	0.238675	0.431664	1.18271	0.102366	1.24031	0.585054	0.524436	0.299387	0.951553	0.833372	0.344592	0.000948064	0.867175	1.51e-05	0.0233961	0.0364435
NZ_CP011454.1	4467321	4467965	+	CDS	GEMMAAP_RS18805	WP_026850960.1	peroxiredoxin family protein	5.10355	0.409183	0.188452	0.33712	-0.104777	-0.0660411	0.0664402	1.68784	1.41392	1.73556	0.230775	0.837184	0.649956	0.847059	0.907226	0.909575	1.63e-08	5.61e-07	1.15e-08
NZ_CP011454.1	3238737	3240230	+	CDS	GEMMAAP_RS13720	WP_053333748.1	serine/threonine protein kinase	8.46177	0.408909	0.0760939	0.119491	0.430319	0.153128	0.297037	0.213064	0.245744	0.258022	0.0305124	0.895964	0.800705	0.0586049	0.488289	0.148684	0.0951318	0.0651853	0.043357
NZ_CP011454.1	2581022	2581801	+	CDS	GEMMAAP_RS10970	WP_053334147.1	hypothetical protein	5.60518	0.408279	0.296042	0.202959	0.0503054	0.189622	0.0572855	1.06152	0.896783	1.04538	0.0980808	0.460052	0.731892	0.908817	0.497648	0.889774	2.42e-07	5.88e-06	3.55e-07
NZ_CP011454.1	4218371	4220161	+	CDS	GEMMAAP_RS17790	WP_043579562.1	GMC family oxidoreductase	5.59669	0.408219	0.18496	0.034647	0.153804	0.107943	0.337535	0.249927	0.547038	0.231959	0.162688	0.798292	0.996605	0.703809	0.78126	0.290572	0.183856	0.00695187	0.227634
NZ_CP011454.1	735026	735331	+	CDS	GEMMAAP_RS03185	WP_026849391.1	hypothetical protein	6.74008	0.407975	0.0476479	0.141626	-0.405495	-0.256607	-0.388155	2.35989	2.00003	2.64303	0.482898	0.975629	0.972791	0.589458	0.713296	0.571557	1.25e-06	1.72e-05	2.71e-07
NZ_CP011454.1	3413647	3414330	-	CDS	GEMMAAP_RS14475	WP_026848621.1	DUF4412 domain-containing protein	8.90236	0.407906	-0.532838	-0.0586781	-0.142026	-0.409811	-0.42234	-0.627694	-0.949662	-1.20424	0.392811	0.513552	0.992231	0.831768	0.428864	0.436342	0.0425117	0.00450088	0.000409976
NZ_CP011454.1	4217434	4217652	-	CDS	GEMMAAP_RS17780	WP_026848144.1	hypothetical protein	3.02701	0.406578	0.289687	0.299543	0.622308	0.0969096	0.11937	0.564111	0.0667229	0.776317	0.328302	0.741563	0.793263	0.176147	0.874981	0.841953	0.0215279	0.836305	0.00330303
NZ_CP011454.1	4425626	4426606	-	CDS	GEMMAAP_RS18640	WP_075071702.1	ornithine cyclodeaminase family protein	5.05494	0.406416	0.319567	0.370413	0.377536	0.336933	0.453408	1.2455	0.862579	1.35981	0.253428	0.64064	0.61951	0.373083	0.372979	0.217495	3.17e-06	0.000534542	1.05e-06
NZ_CP011454.1	406395	407510	-	CDS	GEMMAAP_RS01830	WP_053333935.1	serine hydrolase	5.49119	0.404937	-0.0586474	-0.162179	-0.188177	-0.213268	-0.151527	0.207264	0.415959	-0.0933	0.351504	0.963183	0.934428	0.759347	0.687388	0.801547	0.44568	0.140534	0.747831
NZ_CP011454.1	4397792	4398622	-	CDS	GEMMAAP_RS18540	WP_053334585.1	alpha/beta hydrolase	6.36997	0.403524	-0.0459799	-0.197775	0.0896809	-0.0107758	0.00747375	0.234495	-0.0819031	0.212407	0.103849	0.948911	0.731402	0.810672	0.991437	0.996617	0.146239	0.650522	0.189861
NZ_CP011454.1	1661469	1662350	+	CDS	GEMMAAP_RS06895	WP_053334353.1	peptide chain release factor N(5)-glutamine methyltransferase	6.58473	0.403034	-0.108065	-0.0113006	-0.133679	0.130022	-0.0962016	0.0821202	0.141864	0.13853	0.138351	0.895311	0.999712	0.724879	0.707933	0.80889	0.653038	0.456859	0.442038
NZ_CP011454.1	3001547	3001825	-	CDS	GEMMAAP_RS12735	WP_053334052.1	AtpZ/AtpI family protein	6.03047	0.402764	-0.0697304	0.0677755	0.16719	-0.12125	-0.218461	0.494231	-0.169491	1.04585	0.214398	0.941504	0.986183	0.710078	0.77721	0.591309	0.0195272	0.45174	1.9e-05
NZ_CP011454.1	2328311	2328829	-	CDS	GEMMAAP_RS09865	WP_043581685.1	translation initiation factor IF-3	8.24231	0.401629	-0.0171413	-0.214414	0.217043	0.166018	0.0125005	-0.35981	0.330536	-0.29237	0.114677	0.986022	0.667755	0.480932	0.588532	0.989226	0.0353258	0.0613952	0.0823799
NZ_CP011454.1	3839170	3839526	-	CDS	GEMMAAP_RS20670	WP_158514900.1	nuclear transport factor 2 family protein	4.83555	0.401399	0.178745	-0.0839468	-0.436845	1.13573	-0.514704	-1.11651	-1.49714	-1.18433	0.311907	0.868594	0.985589	0.367852	0.00140017	0.217683	9.97e-05	6.57e-06	9.98e-05
NZ_CP011454.1	2948145	2949035	-	CDS	GEMMAAP_RS12515	WP_053334066.1	L%2CD-transpeptidase	7.13213	0.40109	-0.995895	-0.538406	-0.0914245	-0.733665	-0.655664	-0.611065	-0.794894	-1.25045	0.520702	0.234254	0.652637	0.932212	0.247267	0.324981	0.115297	0.0524645	0.00311025
NZ_CP011454.1	1023502	1025706	-	CDS	GEMMAAP_RS04265	WP_158514729.1	prolyl oligopeptidase family serine peptidase	5.95844	0.40052	0.0559669	0.226694	0.195537	0.638275	0.254077	0.603171	0.344562	0.31991	0.0175115	0.921211	0.480746	0.335676	9.76e-05	0.151356	4.06e-06	0.00350667	0.00523879
NZ_CP011454.1	4039270	4040259	-	CDS	GEMMAAP_RS17025	WP_026848249.1	SDR family oxidoreductase	5.1105	0.399688	0.0440758	0.0549303	-0.107949	-0.174979	0.0632137	0.158242	-0.394953	0.23604	0.177115	0.959814	0.992231	0.81117	0.634537	0.902333	0.410089	0.0534062	0.223776
NZ_CP011454.1	1437578	1439449	+	CDS	GEMMAAP_RS05940	WP_026849837.1	Xaa-Pro dipeptidyl-peptidase	6.41118	0.399632	-0.0624601	0.0931116	0.16947	0.0761378	0.0925317	0.725741	0.42202	0.539958	0.0447477	0.928979	0.899353	0.500679	0.77721	0.738499	4.44e-06	0.0030741	0.000215397
NZ_CP011454.1	4509735	4513166	-	CDS	GEMMAAP_RS18995	WP_158514934.1	S8 family serine peptidase	5.46242	0.398742	-0.0801724	-0.506638	-0.243731	-0.228243	-0.167463	-0.0713071	0.106637	0.0377294	0.312426	0.942652	0.510086	0.643538	0.625256	0.752254	0.779877	0.699674	0.888455
NZ_CP011454.1	2078020	2078898	+	CDS	GEMMAAP_RS08680	WP_026850866.1	GTPase Era	6.16679	0.397441	0.184729	-0.0396802	-0.35878	-0.102548	-0.0879472	0.701776	0.251866	0.959742	0.0855188	0.731305	0.992231	0.197082	0.734081	0.794239	4.67e-05	0.110684	6.19e-07
NZ_CP011454.1	973427	973822	-	CDS	GEMMAAP_RS04060	WP_026850140.1	hypothetical protein	5.26104	0.394824	0.0743065	0.0746901	-0.0474057	0.0473126	0.0746424	0.761642	0.284859	0.913975	0.11798	0.931656	0.999712	0.915699	0.914671	0.849474	3.86e-05	0.0941468	3.81e-06
NZ_CP011454.1	2206374	2207591	-	CDS	GEMMAAP_RS09320	WP_026850773.1	acyl-CoA dehydrogenase family protein	6.0965	0.394726	-0.323307	-0.190235	-0.107926	-0.398352	0.0193949	0.320945	0.310178	0.312477	0.115192	0.415627	0.752824	0.767367	0.128906	0.974682	0.050581	0.0701594	0.0588919
NZ_CP011454.1	1337259	1337678	-	CDS	GEMMAAP_RS05590	WP_043581036.1	hypothetical protein	2.46661	0.394446	0.303463	0.033679	-0.0224843	0.185078	-0.0798158	0.606541	0.301288	0.771016	0.492777	0.831166	0.999712	0.990241	0.793198	0.938437	0.0603816	0.398888	0.025451
NZ_CP011454.1	4501082	4502530	-	CDS	GEMMAAP_RS18970	WP_158514933.1	MBL fold metallo-hydrolase	3.44607	0.393675	0.0992595	0.254605	-0.275988	-0.0786565	-0.180717	-0.504897	-0.220246	-0.624193	0.261053	0.931656	0.770896	0.552578	0.914161	0.684659	0.0243505	0.350348	0.01114
NZ_CP011454.1	1338097	1338582	+	CDS	GEMMAAP_RS05595	WP_026849893.1	VOC family protein	3.10883	0.393504	0.15661	-0.0950145	0.245919	0.295289	0.136362	0.395757	0.50516	0.462929	0.393642	0.913636	0.991629	0.69216	0.557253	0.833179	0.145085	0.0795422	0.107185
NZ_CP011454.1	4261157	4261984	-	CDS	GEMMAAP_RS17960	WP_043579304.1	hypothetical protein	3.46721	0.392522	0.0967171	0.182082	0.48037	0.181696	-0.0544324	0.181543	-0.0596605	0.273686	0.219112	0.927502	0.920901	0.182476	0.63349	0.925222	0.355213	0.798037	0.18085
NZ_CP011454.1	214773	215507	+	CDS	GEMMAAP_RS00935	WP_053333898.1	peptidylprolyl isomerase	4.70859	0.392043	0.431351	0.328978	0.592679	0.33799	0.539765	1.05819	0.87427	1.12182	0.127735	0.186792	0.51547	0.0586049	0.200631	0.0543497	3.41e-07	1.18e-05	1.79e-07
NZ_CP011454.1	3799339	3799989	+	CDS	GEMMAAP_RS16045	WP_145979179.1	GAF domain-containing protein	5.38811	0.39073	0.0865334	0.0248995	0.198199	0.00883825	-0.125078	0.702023	-0.027184	0.731449	0.109545	0.914728	0.999712	0.528226	0.999236	0.69595	6.85e-05	0.884884	4.96e-05
NZ_CP011454.1	2831914	2833068	+	CDS	GEMMAAP_RS12015	WP_053334091.1	phosphate ABC transporter substrate-binding protein PstS	4.91336	0.390427	0.0947849	0.291237	0.0285704	-0.0274381	-0.0374794	0.457944	0.331978	0.46386	0.205533	0.927502	0.657199	0.969006	0.971573	0.950597	0.0203952	0.104745	0.0216858
NZ_CP011454.1	794336	795034	-	CDS	GEMMAAP_RS03390	WP_053334020.1	sugar transferase	8.74385	0.390066	0.248839	0.0412752	0.176629	0.107334	0.00296908	0.28166	-0.036667	0.211553	0.134988	0.63755	0.992231	0.591906	0.755871	0.997706	0.104582	0.85667	0.217933
NZ_CP011454.1	2664859	2665875	+	CDS	GEMMAAP_RS11355	WP_053334127.1	glycosyltransferase family 9 protein	6.79213	0.389588	-0.174806	0.132109	0.0919692	0.141817	-0.0121689	-1.18128	-0.255521	-1.21601	0.063391	0.716624	0.817973	0.760976	0.574922	0.997706	9.5e-09	0.0817984	7.27e-09
NZ_CP011454.1	4155874	4157373	-	CDS	GEMMAAP_RS17500	WP_026848186.1	APC family permease	5.77523	0.387708	0.033563	0.111884	0.288424	0.140382	0.315217	0.862726	0.576244	0.978367	0.102482	0.963031	0.898933	0.306677	0.629665	0.209085	3.12e-06	0.000737832	5.53e-07
NZ_CP011454.1	2933064	2933666	+	CDS	GEMMAAP_RS12435	WP_053334069.1	sigma-70 family RNA polymerase sigma factor	5.79102	0.387353	0.165593	0.0849979	3.61327	-0.177497	-0.169148	-0.480644	-0.715442	-0.416086	0.848212	0.967346	0.999712	0.0586049	0.951275	0.953224	0.620579	0.492918	0.681973
NZ_CP011454.1	2575749	2576252	-	CDS	GEMMAAP_RS10950	WP_026849737.1	tryptophan-rich sensory protein	4.88989	0.386136	0.180078	0.211409	0.0517098	0.332522	0.245056	0.971081	0.272887	0.864925	0.121809	0.750058	0.719867	0.907651	0.196155	0.38399	9.18e-07	0.10217	6.49e-06
NZ_CP011454.1	991516	992223	-	CDS	GEMMAAP_RS04130	WP_026850126.1	hypothetical protein	7.12602	0.385301	-0.225275	-0.2167	-0.704551	-0.392019	-0.643291	1.53667	1.60694	1.58433	0.489219	0.891095	0.916818	0.277977	0.521522	0.268001	0.000137153	0.000138137	9.89e-05
NZ_CP011454.1	637640	637921	+	CDS	GEMMAAP_RS02805	WP_043580188.1	superinfection immunity protein	2.83998	0.384586	-0.188329	0.255027	-0.218855	0.299152	-0.592217	0.778397	0.321683	0.689566	0.373425	0.874895	0.850633	0.720789	0.515103	0.195197	0.00280371	0.236988	0.0103831
NZ_CP011454.1	4493338	4494387	+	CDS	GEMMAAP_RS18925	WP_026850975.1	hypothetical protein	3.85299	0.381997	0.318266	0.260255	-0.123389	-0.335673	0.111554	1.60265	0.927717	1.81226	0.346424	0.701532	0.833334	0.846086	0.43971	0.860884	1.71e-07	0.000529326	3.19e-08
NZ_CP011454.1	4535541	4536170	+	CDS	GEMMAAP_RS19100	WP_026851000.1	RNA polymerase sigma factor	4.44297	0.381633	0.0784917	0.221752	0.382698	0.474682	0.136136	1.30994	0.751125	1.27236	0.223906	0.941504	0.798027	0.302468	0.128305	0.749635	1.94e-07	0.000590454	4e-07
NZ_CP011454.1	1010809	1011906	+	CDS	GEMMAAP_RS04220	WP_026850112.1	hypothetical protein	4.96536	0.381354	-0.183373	0.107294	0.263987	0.165622	0.132089	0.64824	0.475992	0.776917	0.113796	0.740809	0.964366	0.369134	0.552005	0.670624	0.000137496	0.00424179	1.82e-05
NZ_CP011454.1	151568	151927	+	CDS	GEMMAAP_RS00680	WP_026849024.1	hypothetical protein	4.91844	0.380703	-0.167209	-0.393354	-0.0882677	-0.170627	-0.167153	0.207973	0.536939	0.102119	0.333824	0.884211	0.648602	0.895127	0.724901	0.751375	0.390997	0.0346327	0.693111
NZ_CP011454.1	3411283	3412131	-	CDS	GEMMAAP_RS14455	WP_053333711.1	DUF547 domain-containing protein	6.12489	0.380222	-0.218088	-0.439342	-0.05662	-0.0739407	-0.3497	-0.134039	0.239572	-0.0566412	0.370401	0.854599	0.605839	0.946494	0.919824	0.467253	0.620751	0.396592	0.844148
NZ_CP011454.1	3230630	3231211	+	CDS	GEMMAAP_RS13685	WP_053333749.1	C40 family peptidase	7.78031	0.38016	0.0316294	-0.118227	0.313877	0.0820318	0.087798	0.377958	0.0202983	0.27652	0.214749	0.970361	0.919308	0.383575	0.855339	0.859971	0.0620513	0.935038	0.166683
NZ_CP011454.1	3593424	3593798	+	CDS	GEMMAAP_RS15190	WP_075071689.1	metalloregulator ArsR/SmtB family transcription factor	5.70939	0.379812	-0.187574	-0.117262	-0.026024	-0.222849	0.013233	0.752418	0.816377	0.778136	0.275657	0.845272	0.949126	0.975613	0.583109	0.994055	0.00123067	0.00083789	0.00103152
NZ_CP011454.1	4120320	4120601	+	CDS	GEMMAAP_RS17370	WP_043579332.1	rhodanese-like domain-containing protein	3.05686	0.379404	0.312019	0.595741	0.270622	0.197422	0.157994	0.211632	0.0213131	0.0438013	0.351188	0.704858	0.412995	0.602621	0.676055	0.768624	0.378484	0.983029	0.87303
NZ_CP011454.1	1802836	1803561	-	CDS	GEMMAAP_RS07505	WP_026850467.1	hypothetical protein	4.09186	0.379213	0.290835	-0.10642	0.166428	0.278543	0.325055	-0.429524	-0.227084	-0.248424	0.368768	0.752243	0.981429	0.782205	0.55155	0.493941	0.101994	0.421461	0.368353
NZ_CP011454.1	3498691	3499623	-	CDS	GEMMAAP_RS14785	WP_053333696.1	ABC transporter ATP-binding protein	2.64132	0.378035	0.204067	0.0295345	-0.298651	0.286477	0.133035	-0.483026	-0.480754	-0.0492258	0.441103	0.880134	0.999712	0.656851	0.597979	0.852837	0.104797	0.133885	0.88358
NZ_CP011454.1	658463	660187	+	CDS	GEMMAAP_RS02855	WP_026849343.1	sodium:solute symporter family protein	5.0479	0.376986	0.0145454	-0.0537248	0.357206	0.309968	0.494856	0.380612	0.829956	0.159106	0.231824	0.991831	0.992231	0.333738	0.355498	0.126701	0.0558634	0.000253771	0.440818
NZ_CP011454.1	2548285	2548869	+	CDS	GEMMAAP_RS10825	WP_043580717.1	hypothetical protein	6.07139	0.37606	-0.148419	-0.084993	-0.205336	-0.102655	-0.378713	1.06931	0.51257	1.06056	0.284536	0.889881	0.980694	0.660759	0.83172	0.330001	3.27e-05	0.0285461	3.77e-05
NZ_CP011454.1	2489619	2490359	-	CDS	GEMMAAP_RS20000	WP_053334165.1	sterol desaturase family protein	4.37236	0.374671	0.245656	0.102343	0.354604	-0.105524	0.262577	1.73918	1.13818	1.74176	0.275207	0.741563	0.999712	0.387386	0.819645	0.496688	6.13e-09	8.87e-06	7.04e-09
NZ_CP011454.1	3413213	3413506	-	CDS	GEMMAAP_RS14470	WP_026848622.1	hypothetical protein	7.55046	0.374451	-0.389833	-0.353022	-0.169079	-0.276411	-0.429114	0.880421	1.1687	1.00399	0.433738	0.704265	0.731417	0.800819	0.626273	0.423609	0.00566387	0.000762578	0.0020582
NZ_CP011454.1	3341019	3341522	+	CDS	GEMMAAP_RS14175	WP_043579468.1	hypothetical protein	8.91346	0.374072	-0.406352	0.253598	-0.288955	-1.04991	-0.878367	2.89005	3.35715	2.91664	0.789923	0.903534	0.978552	0.871284	0.386625	0.497532	0.000667401	0.00027821	0.000594956
NZ_CP011454.1	3845688	3847016	+	CDS	GEMMAAP_RS16265	WP_053333619.1	pilus assembly protein TadG-related protein	6.93657	0.373669	0.44242	0.347994	0.0928265	-0.0203645	0.132364	-0.173504	-0.509245	-0.304974	0.109772	0.121768	0.350647	0.784129	0.973159	0.664525	0.257897	0.00255165	0.0499105
NZ_CP011454.1	661053	662207	-	CDS	GEMMAAP_RS02870	WP_026849345.1	hypothetical protein	5.98255	0.37332	0.143554	0.134578	0.185234	-0.0159678	0.335629	0.733392	0.244572	0.563883	0.131073	0.831981	0.862154	0.562068	0.982395	0.200782	5.61e-05	0.146087	0.00114511
NZ_CP011454.1	2586855	2587298	-	CDS	GEMMAAP_RS10985	WP_158514821.1	pyridoxamine 5'-phosphate oxidase family protein	5.19896	0.373219	-0.0625752	0.122891	0.506521	0.267532	0.276243	0.760358	0.412122	0.673203	0.18845	0.941504	0.916818	0.137899	0.386862	0.394399	0.000155149	0.0317998	0.000716831
NZ_CP011454.1	4365202	4365885	+	CDS	GEMMAAP_RS18395	WP_158514925.1	1-acyl-sn-glycerol-3-phosphate acyltransferase	5.0811	0.372973	-0.116336	0.0408319	0.173417	0.151866	-0.120027	1.11813	0.515181	1.26336	0.17619	0.891095	0.992231	0.644402	0.652473	0.75504	5.17e-07	0.00642088	9.28e-08
NZ_CP011454.1	1561995	1562870	-	CDS	GEMMAAP_RS06485	WP_053334337.1	cobalamin-dependent protein	7.50525	0.37268	0.259682	0.318046	0.292297	0.178046	0.322542	-0.117647	-0.26975	-0.233283	0.0609691	0.415627	0.320281	0.201414	0.431101	0.135038	0.380197	0.0541359	0.0804416
NZ_CP011454.1	1220316	1221005	+	CDS	GEMMAAP_RS05070	WP_026849984.1	50S ribosomal protein L1	8.40844	0.372672	-0.15605	-0.253669	-0.055874	0.300319	-0.111666	-0.825874	-0.0902102	-1.07059	0.153688	0.829225	0.605839	0.896707	0.297803	0.765576	4.02e-05	0.640154	1.08e-06
NZ_CP011454.1	2217140	2217583	+	CDS	GEMMAAP_RS20540	WP_053334518.1	BLUF domain-containing protein	5.87988	0.372602	0.222455	0.332412	-0.374554	-0.312546	-0.0750046	0.901418	0.049342	1.00997	0.19046	0.736802	0.554454	0.278161	0.318983	0.872517	2.43e-05	0.81841	5.58e-06
NZ_CP011454.1	1751578	1752192	+	CDS	GEMMAAP_RS07265	WP_043581357.1	fumarylacetoacetate hydrolase family protein	7.11695	0.37245	-0.6391	-0.449279	-0.351598	-0.617383	-0.632578	-0.552755	-0.762104	-1.30333	0.456571	0.391857	0.640828	0.562068	0.226816	0.223014	0.0805125	0.0234777	0.000326142
NZ_CP011454.1	3291520	3292893	+	CDS	GEMMAAP_RS13945	WP_158514867.1	TolC family protein	5.34742	0.371582	0.0616587	0.263927	0.0488291	0.207788	0.201943	0.458585	0.401798	0.664662	0.101514	0.937933	0.563872	0.901375	0.398343	0.437911	0.00255024	0.00961611	6.58e-05
NZ_CP011454.1	2983571	2985583	+	CDS	GEMMAAP_RS12650	WP_082821571.1	carbon starvation protein A	5.5061	0.370852	0.194902	0.312447	0.23821	0.0127231	0.449662	1.41267	1.60708	1.28653	0.186935	0.772261	0.586472	0.506686	0.991367	0.126415	1.86e-08	5.52e-09	9.73e-08
NZ_CP011454.1	2518278	2518982	+	CDS	GEMMAAP_RS10730	WP_145979096.1	VTT domain-containing protein	6.26915	0.369191	0.0147147	0.212842	-0.0980559	0.026338	0.0626266	0.577258	0.151923	0.383929	0.0492618	0.981422	0.564129	0.714952	0.945536	0.956384	4.69e-05	0.247266	0.00341311
NZ_CP011454.1	2527424	2528029	+	CDS	GEMMAAP_RS10765	WP_026849764.1	DUF502 domain-containing protein	6.80789	0.369099	0.0262843	0.123292	0.229001	0.0313206	0.00936956	0.528656	0.11141	0.599005	0.0672623	0.965706	0.831733	0.345366	0.936928	0.990606	0.000318	0.437386	7.94e-05
NZ_CP011454.1	346950	347492	-	CDS	GEMMAAP_RS01530	WP_145978939.1	hypothetical protein	6.06076	0.369087	-0.0262454	-0.141809	-0.0672285	-0.0423377	-0.164658	-0.162662	-0.515012	-0.521001	0.13391	0.969356	0.849967	0.871223	0.927434	0.601458	0.311996	0.00358548	0.00278997
NZ_CP011454.1	130849	131760	-	CDS	GEMMAAP_RS00565	WP_043580083.1	alpha/beta hydrolase	2.84667	0.368294	0.254775	0.430725	0.719326	0.106915	0.19529	1.24777	0.970564	1.09262	0.43833	0.830567	0.680314	0.165408	0.869439	0.746863	3.63e-05	0.00116604	0.000326368
NZ_CP011454.1	3300712	3301215	-	CDS	GEMMAAP_RS13990	WP_053333734.1	MarR family transcriptional regulator	2.88658	0.367927	0.264676	0.024969	-0.144708	0.599439	-0.0117986	0.659093	0.984618	0.719927	0.410157	0.791958	0.999712	0.831909	0.153461	0.996617	0.0116885	0.000622654	0.00954703
NZ_CP011454.1	2701397	2702782	+	CDS	GEMMAAP_RS11510	WP_053334117.1	insulinase family protein	5.96224	0.367898	0.0158386	-0.124023	-0.291939	-0.190856	-0.482993	1.20804	1.15466	1.23935	0.282121	0.991568	0.938352	0.518639	0.645102	0.184283	3.77e-06	1.34e-05	2.83e-06
NZ_CP011454.1	2919690	2920496	+	CDS	GEMMAAP_RS12370	WP_026849530.1	hypothetical protein	4.98068	0.367793	-0.0861238	0.0130862	-0.217387	-0.00536987	-0.0996347	0.78957	-0.0504707	0.91563	0.185334	0.927576	0.999712	0.554965	0.999236	0.804066	7.23e-05	0.808038	1.28e-05
NZ_CP011454.1	146924	147355	+	CDS	GEMMAAP_RS00645	WP_026849019.1	DUF1801 domain-containing protein	4.89667	0.36659	0.00499365	0.00869814	-0.00273616	-0.135825	0.0319667	1.24121	0.862049	1.50466	0.228279	0.999855	0.999712	0.999455	0.724286	0.956384	3.33e-07	0.000101908	1.84e-08
NZ_CP011454.1	2442242	2443315	-	CDS	GEMMAAP_RS10360	WP_053334183.1	DNA-directed RNA polymerase subunit alpha	8.06177	0.366498	0.0267331	-0.122997	-0.346529	0.0630658	-0.122481	0.130905	0.507103	-0.399648	0.136358	0.968958	0.86572	0.2184	0.863737	0.71369	0.427132	0.00408394	0.016505
NZ_CP011454.1	2726970	2727821	-	CDS	GEMMAAP_RS11620	WP_043580691.1	SDR family oxidoreductase	4.7808	0.366242	0.232837	-0.0263239	0.309395	0.419636	0.357859	1.10076	1.23158	1.14328	0.13391	0.619511	0.999712	0.290022	0.0850902	0.157991	7.91e-08	3.03e-08	5.61e-08
NZ_CP011454.1	3121407	3121871	-	CDS	GEMMAAP_RS13215	WP_026848814.1	nuclear transport factor 2 family protein	2.68736	0.365045	0.0955691	0.090638	-0.900085	-0.457586	-0.524258	0.0420198	-0.0919929	0.0575803	0.498307	0.947067	0.992231	0.178725	0.421319	0.37311	0.89983	0.805072	0.872366
NZ_CP011454.1	3070353	3070637	-	CDS	GEMMAAP_RS13015	WP_026849432.1	hypothetical protein	3.42773	0.36368	0.413155	0.216756	-0.227517	0.0240443	-0.0574644	0.339293	-0.0700482	0.154983	0.401067	0.589301	0.886205	0.70511	0.986155	0.942666	0.185651	0.820034	0.583956
NZ_CP011454.1	4494489	4494995	+	CDS	GEMMAAP_RS18930	WP_202969166.1	acyl-CoA thioesterase	2.58671	0.362496	0.363055	-0.273461	0.354015	-0.0761204	0.401676	0.409375	0.214137	0.192463	0.471904	0.726487	0.886729	0.564538	0.932212	0.443883	0.151609	0.501304	0.544345
NZ_CP011454.1	301469	301843	+	CDS	GEMMAAP_RS01340	WP_026849121.1	hypothetical protein	3.81964	0.362205	0.214176	-0.124413	-0.412854	-0.234978	-0.553542	-1.25196	-0.970922	-1.16149	0.632942	0.921211	0.992231	0.657611	0.786965	0.482205	0.0065435	0.0388601	0.0169227
NZ_CP011454.1	3898016	3898504	-	CDS	GEMMAAP_RS16475	WP_145979194.1	hypothetical protein	4.6144	0.362147	0.156225	0.209941	0.0323453	-0.00708856	-0.183154	1.02654	0.451489	0.901346	0.22806	0.85376	0.798027	0.959961	0.998151	0.627738	4.4e-06	0.0229942	3.44e-05
NZ_CP011454.1	4567151	4568164	+	CDS	GEMMAAP_RS19230	WP_026851021.1	MlaD family protein	5.68694	0.361805	-0.137282	0.330991	-0.00778949	-0.0501727	-0.27153	-0.03954	-0.508451	-0.541792	0.250322	0.883778	0.596384	0.994121	0.931878	0.452101	0.851024	0.0177416	0.0107475
NZ_CP011454.1	1047968	1048471	+	CDS	GEMMAAP_RS04365	WP_043581077.1	L-2-amino-thiazoline-4-carboxylic acid hydrolase	4.50516	0.360487	0.33411	-0.0151955	0.138752	-0.372581	-0.0999094	1.51211	1.20394	1.46265	0.489515	0.772486	0.999712	0.869289	0.510473	0.906704	2.25e-05	0.00051628	4.16e-05
NZ_CP011454.1	4161653	4162396	-	CDS	GEMMAAP_RS17525	WP_026848184.1	hypothetical protein	3.5008	0.35988	0.390888	0.622754	0.440016	-0.126205	0.485215	1.91607	2.06743	2.18985	0.688678	0.840276	0.731402	0.656244	0.926595	0.573114	7.57e-05	5.53e-05	1.88e-05
NZ_CP011454.1	2443424	2444059	-	CDS	GEMMAAP_RS10365	WP_026849822.1	30S ribosomal protein S4	7.91233	0.359554	-0.0996757	-0.144384	-0.184279	0.231597	-0.0753841	-0.104774	0.38213	-0.538431	0.176841	0.907624	0.847642	0.590659	0.43971	0.863194	0.560634	0.0393315	0.003702
NZ_CP011454.1	2639536	2640393	-	CDS	GEMMAAP_RS11260	WP_158514831.1	LytTR family DNA-binding domain-containing protein	8.66919	0.359482	-0.666785	-0.421595	0.121916	-0.244869	-0.498601	-0.77799	-0.988502	-1.16531	0.265672	0.0694359	0.429471	0.781111	0.504902	0.142594	0.000654209	7.55e-05	5.1e-06
NZ_CP011454.1	357064	357723	+	CDS	GEMMAAP_RS01580	WP_053333926.1	DUF305 domain-containing protein	6.98177	0.35933	-0.110972	0.0364985	0.00232268	-0.143586	-0.0975472	0.971336	0.813386	1.05009	0.230775	0.905829	0.993197	0.999455	0.703207	0.825406	1.96e-05	0.00025444	6.59e-06
NZ_CP011454.1	3839657	3840589	+	CDS	GEMMAAP_RS16240	WP_053333622.1	N-acetylmuramoyl-L-alanine amidase	3.76522	0.3593	-0.0199226	0.331184	0.0348562	0.67072	0.072256	0.65381	0.285949	0.535396	0.307796	0.987171	0.702269	0.965476	0.0385316	0.964544	0.00277035	0.202746	0.0160959
NZ_CP011454.1	2795573	2796151	-	CDS	GEMMAAP_RS11880	WP_053334100.1	DUF2911 domain-containing protein	8.10724	0.359214	-0.38305	-0.393385	-0.118924	-0.490843	-0.429932	-0.49081	-1.03993	-1.16755	0.380977	0.623121	0.596936	0.840371	0.249594	0.34052	0.0623708	0.000521642	0.000102045
NZ_CP011454.1	3939123	3939542	-	CDS	GEMMAAP_RS16635	WP_145979199.1	hypothetical protein	6.16014	0.359191	-0.00052144	0.18045	0.0427506	0.0547028	-0.0836839	2.12021	1.72138	2.29874	0.239305	0.999855	0.847642	0.946579	0.918965	0.863194	1.05e-10	7.08e-09	3.51e-11
NZ_CP011454.1	4707772	4708368	-	CDS	GEMMAAP_RS19840	WP_179947317.1	TIGR00730 family Rossman fold protein	5.00515	0.359116	0.0728783	0.190621	0.47705	0.734341	0.269918	-0.171294	-0.279574	0.00498866	0.236423	0.941504	0.825623	0.178724	0.00972592	0.429156	0.376244	0.172642	0.98026
NZ_CP011454.1	3376035	3376832	-	CDS	GEMMAAP_RS14320	WP_053333720.1	phosphate ABC transporter ATP-binding protein	2.09907	0.357842	0.122507	0.131807	0.526934	0.508708	-0.182155	-0.591154	-0.33404	-0.42413	0.508222	0.941504	0.981855	0.379164	0.327988	0.799517	0.0668166	0.337203	0.229023
NZ_CP011454.1	2910301	2910909	-	CDS	GEMMAAP_RS12335	WP_026849536.1	Maf family protein	4.85145	0.357243	-0.0829783	0.0582251	0.164916	-0.00745975	-0.0119081	0.867239	0.277512	1.01198	0.312635	0.941504	0.992231	0.734459	0.998733	0.994543	0.000268915	0.231705	5.4e-05
NZ_CP011454.1	1504920	1505648	-	CDS	GEMMAAP_RS06195	WP_053334323.1	DUF1080 domain-containing protein	4.78541	0.356451	0.0948343	-0.015865	0.206209	-0.0639764	0.204417	0.278435	0.311399	0.126631	0.18577	0.915166	0.999712	0.556633	0.873911	0.517985	0.104974	0.0845192	0.609161
NZ_CP011454.1	1818747	1819151	-	CDS	GEMMAAP_RS20295	WP_145979050.1	hypothetical protein	6.77419	0.356392	0.258506	-0.00555498	-0.0902578	0.180372	-0.245746	0.191196	-0.00199666	0.0231602	0.175652	0.614907	0.999712	0.818427	0.558985	0.42354	0.266831	0.992716	0.900907
NZ_CP011454.1	3790857	3791558	-	CDS	GEMMAAP_RS16010	WP_026848405.1	DUF969 domain-containing protein	3.06771	0.356037	0.115447	0.219176	0.599819	0.436329	0.162955	0.185119	-0.322916	0.187841	0.440042	0.938883	0.897613	0.231221	0.345183	0.790492	0.497221	0.281951	0.519782
NZ_CP011454.1	1819576	1820517	+	CDS	GEMMAAP_RS07560	WP_026850476.1	glutathione synthase	6.02053	0.355682	0.161267	-0.31547	-0.19755	-0.19584	-0.130471	1.29501	0.451394	1.33082	0.224678	0.83975	0.599741	0.618856	0.563376	0.746863	1.58e-07	0.0223338	1.1e-07
NZ_CP011454.1	2640763	2641905	+	CDS	GEMMAAP_RS11265	WP_053334135.1	histidine kinase	5.80882	0.354639	-0.258804	0.115972	0.000397739	-0.221682	-0.0273948	0.0984992	-0.407061	-0.17725	0.264469	0.705959	0.936148	0.999704	0.542822	0.965832	0.631976	0.0573193	0.390808
NZ_CP011454.1	2607048	2607776	+	CDS	GEMMAAP_RS11125	WP_026849717.1	ABC transporter ATP-binding protein	4.98733	0.353879	0.0503292	0.0063254	-0.375173	-0.15449	-0.146926	0.237655	0.104779	-0.0652733	0.191499	0.948367	0.999712	0.259203	0.645102	0.676883	0.170487	0.588071	0.793955
NZ_CP011454.1	3442736	3443416	-	CDS	GEMMAAP_RS14595	WP_158514877.1	sigma-70 family RNA polymerase sigma factor	10.6258	0.353722	-0.10802	-0.0211116	0.352849	0.501318	0.330948	-1.33812	-0.311234	-1.14278	0.138351	0.884074	0.999712	0.180255	0.0386286	0.198295	9.39e-09	0.0611461	9.82e-08
NZ_CP011454.1	1096950	1097546	+	CDS	GEMMAAP_RS04560	WP_202969188.1	LemA family protein	7.54015	0.353356	-0.22909	-0.031517	0.00949543	-0.107291	-0.259744	0.092595	0.228272	-0.226829	0.398976	0.839088	0.999712	0.994121	0.857496	0.616863	0.7369	0.42146	0.39681
NZ_CP011454.1	3626194	3626703	+	CDS	GEMMAAP_RS15325	WP_026848500.1	(2Fe-2S)-binding protein	7.84649	0.35325	0.206536	-0.0956384	-0.210886	-0.198439	0.0423361	1.02319	0.813309	0.756896	0.185334	0.73864	0.92985	0.530208	0.524198	0.933951	2.45e-06	8.69e-05	0.000123011
NZ_CP011454.1	4318973	4319554	+	CDS	GEMMAAP_RS20790	WP_043581754.1	c-type cytochrome	4.83931	0.35196	0.259804	0.125237	-0.406186	0.0616705	-0.0582677	0.823016	0.506848	0.806953	0.192179	0.619511	0.999712	0.221358	0.879953	0.900778	3.23e-05	0.00637684	5.23e-05
NZ_CP011454.1	1741516	1742241	+	CDS	GEMMAAP_RS07240	WP_082821142.1	DUF4159 domain-containing protein	6.83821	0.35159	-0.281304	-0.403974	-0.278284	-0.517002	-0.643907	-0.411077	-0.750622	-0.976386	0.459141	0.811103	0.663258	0.653497	0.297836	0.19074	0.166164	0.0189809	0.00263824
NZ_CP011454.1	519923	520570	+	CDS	GEMMAAP_RS02265	WP_026849253.1	hypothetical protein	5.09781	0.350664	0.207541	0.268277	0.365042	0.481998	0.29245	-0.0639487	-0.312201	0.246143	0.175347	0.717477	0.615212	0.226094	0.0624634	0.29473	0.709508	0.0769611	0.143774
NZ_CP011454.1	2202413	2203159	+	CDS	GEMMAAP_RS09295	WP_082821201.1	glycerophosphodiester phosphodiesterase	5.92279	0.350161	-0.0737286	-0.068493	0.257529	-0.247919	-0.0294991	0.313838	-0.202083	0.337132	0.149127	0.929364	0.981429	0.378349	0.355498	0.951525	0.0476601	0.228758	0.0360328
NZ_CP011454.1	3412477	3413172	-	CDS	GEMMAAP_RS14465	WP_082821353.1	CAAX prenyl protease-related protein	7.69072	0.350021	-0.279212	-0.171731	-0.204706	-0.232715	-0.5302	0.477949	0.535858	0.224405	0.36905	0.748441	0.892996	0.680429	0.615191	0.192849	0.0556495	0.0398188	0.364345
NZ_CP011454.1	2466013	2466342	+	CDS	GEMMAAP_RS10515	WP_026849801.1	iron-sulfur cluster assembly accessory protein	9.67656	0.350013	-0.276757	-0.0327618	0.477152	-0.501969	0.200002	0.368191	-0.117452	0.0734908	0.172781	0.564584	0.992231	0.0995397	0.0576233	0.517985	0.0332245	0.525156	0.676378
NZ_CP011454.1	3070634	3070963	-	CDS	GEMMAAP_RS13020	WP_053334040.1	RidA family protein	3.31393	0.349372	0.380639	0.172574	0.0469704	0.241751	0.299855	0.988316	0.462768	0.961843	0.333824	0.512583	0.922242	0.949736	0.538516	0.440179	3.65e-05	0.0401238	8.57e-05
NZ_CP011454.1	1856472	1856993	-	CDS	GEMMAAP_RS07680	WP_026850495.1	type 1 glutamine amidotransferase	4.99638	0.349235	0.289947	0.306776	0.467461	0.0400494	0.193435	1.43697	0.783076	1.50179	0.350967	0.707159	0.726682	0.269451	0.956009	0.673115	5.15e-07	0.00165599	2.97e-07
NZ_CP011454.1	1823931	1824698	-	CDS	GEMMAAP_RS07580	WP_082821550.1	SDR family oxidoreductase	2.96705	0.349003	-0.141888	-0.324395	-0.399682	0.10748	-0.290974	0.692072	-0.0791809	0.625101	0.34822	0.895311	0.738901	0.387386	0.824464	0.488172	0.00214489	0.843843	0.00724668
NZ_CP011454.1	265437	265946	+	CDS	GEMMAAP_RS01155	WP_026849093.1	GAF domain-containing protein	6.07826	0.348215	-0.0676407	-0.219454	-0.0940194	-0.232081	-0.124765	0.217368	-0.0945714	0.135416	0.170377	0.938883	0.704628	0.805223	0.409628	0.714922	0.18495	0.605504	0.419116
NZ_CP011454.1	4519090	4519671	-	CDS	GEMMAAP_RS19020	WP_158514935.1	hypothetical protein	4.12886	0.347915	-0.262038	0.0796255	0.180451	0.0248739	0.0953661	0.449745	-0.0582193	0.606635	0.29311	0.715672	0.981434	0.68011	0.977661	0.851194	0.0269927	0.807449	0.00476721
NZ_CP011454.1	403536	404582	+	CDS	GEMMAAP_RS01820	WP_075071384.1	asparaginase	4.77918	0.347185	0.0676339	0.566068	0.221202	0.299599	0.500919	1.49072	1.57028	1.65391	0.23959	0.941504	0.204163	0.553829	0.330988	0.0991531	7.66e-09	8.41e-09	1.69e-09
NZ_CP011454.1	594792	595235	-	CDS	GEMMAAP_RS02645	WP_026849316.1	SufE family protein	5.36192	0.346912	0.014789	0.372261	0.137362	-0.134037	0.083672	1.09571	0.637335	1.25112	0.250322	0.991568	0.51547	0.741994	0.724369	0.859971	2.04e-06	0.00206601	3.2e-07
NZ_CP011454.1	192603	193106	-	CDS	GEMMAAP_RS00855	WP_026849046.1	hypothetical protein	4.34488	0.346779	0.496228	0.129679	-0.10284	0.169245	0.249559	0.81652	0.905072	0.866296	0.255704	0.188142	0.922233	0.825816	0.641529	0.467003	9.05e-05	4.63e-05	6.34e-05
NZ_CP011454.1	64232	66436	+	CDS	GEMMAAP_RS00280	WP_145978921.1	hypothetical protein	7.4737	0.34669	-0.741255	0.0626924	-0.115157	-0.595254	-0.541868	-1.08284	-0.955689	-1.37544	0.577279	0.415627	0.996006	0.903607	0.34837	0.414498	0.00657871	0.0184032	0.00110359
NZ_CP011454.1	1592886	1593839	-	CDS	GEMMAAP_RS06625	WP_026850333.1	chlorophyll synthesis pathway protein BchC	6.84088	0.346611	-0.0035289	0.195885	0.238728	-0.831845	0.304238	0.221505	-0.127582	-0.0854579	0.141262	0.999855	0.697421	0.399741	0.000360799	0.230125	0.152871	0.442803	0.594102
NZ_CP011454.1	1353712	1354503	+	CDS	GEMMAAP_RS05645	WP_026849885.1	LytTR family DNA-binding domain-containing protein	4.33242	0.346455	0.0704622	-0.242739	0.15434	0.503681	0.119977	-0.106393	-0.187983	-0.490341	0.312635	0.941504	0.794028	0.747961	0.131697	0.798459	0.621578	0.410887	0.0312145
NZ_CP011454.1	1080780	1081457	+	CDS	GEMMAAP_RS04500	WP_026850075.1	hypothetical protein	7.23493	0.346353	-0.507881	-0.430856	-0.0834773	-0.50023	-0.511812	-0.143645	-0.648138	-0.631919	0.391442	0.414506	0.554454	0.899709	0.22954	0.225125	0.581654	0.0181455	0.0169552
NZ_CP011454.1	53919	54500	-	CDS	GEMMAAP_RS00240	WP_026848965.1	RNA polymerase sigma factor	7.87109	0.345922	-0.301236	-0.419703	-0.369489	-0.620306	-0.811132	0.798601	-0.231697	0.274957	0.560874	0.848388	0.7273	0.605045	0.308549	0.179001	0.0315135	0.557799	0.448979
NZ_CP011454.1	3708650	3710257	-	CDS	GEMMAAP_RS15705	WP_053333646.1	NAD(P)-binding protein	6.21773	0.345336	-0.202568	0.220971	0.267521	0.0104618	0.0231268	-0.958688	-0.2702	-0.864401	0.389076	0.858729	0.847642	0.597261	0.996924	0.981438	0.00059211	0.312752	0.00193601
NZ_CP011454.1	2495893	2496279	-	CDS	GEMMAAP_RS10650	WP_158514815.1	PEP-CTERM sorting domain-containing protein	2.61895	0.344852	0.195785	0.215161	0.0665909	-0.448909	-0.209009	0.185739	-0.289341	-0.137665	0.439616	0.867401	0.938132	0.936685	0.342907	0.71243	0.482263	0.322638	0.705279
NZ_CP011454.1	4402986	4403660	-	CDS	GEMMAAP_RS20690	WP_075071571.1	hypothetical protein	6.53358	0.344639	-0.00567433	0.220723	0.0183578	-0.0987808	-0.0623556	2.26052	1.93361	2.29621	0.364446	0.999855	0.837774	0.985588	0.851681	0.927651	1.86e-09	3.94e-08	1.3e-09
NZ_CP011454.1	356530	356790	+	CDS	GEMMAAP_RS01575	WP_026849158.1	hypothetical protein	4.79543	0.343829	-0.521778	-0.12569	0.425066	-0.0803564	-0.265015	0.661947	0.367801	0.868233	0.301191	0.263999	0.938132	0.259863	0.865777	0.48921	0.00211815	0.0878942	0.00016701
NZ_CP011454.1	927510	928205	+	CDS	GEMMAAP_RS03875	WP_026850167.1	DUF642 domain-containing protein	8.36558	0.343322	0.263134	0.164855	-0.0982418	-0.0408365	-0.207251	1.0949	0.823523	1.01899	0.178744	0.595262	0.793263	0.7899	0.935138	0.498062	5.5e-07	4.82e-05	1.44e-06
NZ_CP011454.1	1679314	1679757	-	CDS	GEMMAAP_RS06960	WP_026850386.1	50S ribosomal protein L9	6.9142	0.343116	0.0317281	-0.0345176	0.0692671	0.0763765	-0.0303218	-0.933751	-0.507038	-1.53759	0.258472	0.969356	0.993521	0.889948	0.861758	0.960611	4.16e-05	0.0153105	4.51e-08
NZ_CP011454.1	3800434	3801153	+	CDS	GEMMAAP_RS16055	WP_053333633.1	response regulator transcription factor	6.78614	0.34308	0.133735	0.215992	0.0886315	0.0696309	0.0523469	0.454064	-0.164871	0.601317	0.214236	0.864314	0.7273	0.829199	0.864069	0.916612	0.0133828	0.390626	0.00168604
NZ_CP011454.1	106159	106476	+	CDS	GEMMAAP_RS00440	WP_026848994.1	nucleotidyltransferase family protein	6.17093	0.343055	-0.0670287	0.291861	0.317735	0.106446	0.0632391	0.997662	0.874636	1.20317	0.11798	0.928979	0.48366	0.214511	0.702736	0.94885	1.26e-07	1.81e-06	6.81e-09
NZ_CP011454.1	4189709	4190836	+	CDS	GEMMAAP_RS17675	WP_026848160.1	TIGR03790 family protein	4.96894	0.342759	-0.17237	-0.161973	-0.435704	-0.241924	-0.247952	0.35148	0.709787	0.321963	0.352397	0.864314	0.916058	0.325978	0.558985	0.572725	0.119306	0.00375091	0.161912
NZ_CP011454.1	1396779	1397582	+	CDS	GEMMAAP_RS05805	WP_202969193.1	N(G)%2CN(G)-dimethylarginine dimethylaminohydrolase	3.55568	0.34259	0.185197	-0.149586	-0.206957	-0.0951492	-0.263574	0.53834	0.167882	0.45274	0.353116	0.857893	0.934372	0.688769	0.853927	0.539642	0.0167369	0.49091	0.0514321
NZ_CP011454.1	4713915	4715603	-	CDS	GEMMAAP_RS19870	WP_026848927.1	membrane protein insertase YidC	7.14082	0.34118	-0.0758105	-0.0977099	-0.148963	0.00624614	-0.0512163	-0.448988	-0.127442	-0.621547	0.0492618	0.891095	0.847642	0.499976	0.996447	0.857814	0.00041984	0.302106	8.85e-06
NZ_CP011454.1	1313848	1314708	+	CDS	GEMMAAP_RS20815	WP_145979018.1	hypothetical protein	6.98529	0.340711	-0.299292	-0.366569	-0.195876	-0.412724	-0.406388	-0.000909439	-0.338061	-0.552122	0.392811	0.73864	0.642991	0.713569	0.330289	0.357593	0.997718	0.203994	0.0327637
NZ_CP011454.1	3427866	3429845	-	CDS	GEMMAAP_RS14530	WP_026848612.1	methyl-accepting chemotaxis protein	5.35119	0.340189	0.0921121	0.159906	0.140928	0.229972	0.107121	0.587905	-0.0434842	0.849857	0.375179	0.941504	0.916793	0.79313	0.601302	0.852621	0.014313	0.877503	0.000901396
NZ_CP011454.1	3165015	3165266	+	CDS	GEMMAAP_RS13365	WP_026848791.1	hypothetical protein	6.54587	0.339933	0.0143515	-0.152192	0.207101	0.0345017	-0.140268	1.08995	1.07713	1.31634	0.246386	0.991568	0.870368	0.590554	0.951539	0.719974	2.3e-06	5.24e-06	1.38e-07
NZ_CP011454.1	2896604	2897203	+	CDS	GEMMAAP_RS12275	WP_202969224.1	ATP-dependent Clp protease proteolytic subunit	8.68075	0.339783	-0.126896	-0.158423	-0.355014	-0.337021	-0.255773	-0.0499631	-0.434142	-0.628399	0.186935	0.864314	0.801771	0.220597	0.22084	0.395099	0.779039	0.0168209	0.000691353
NZ_CP011454.1	600389	601369	-	CDS	GEMMAAP_RS02670	WP_026849321.1	aldo/keto reductase	4.99023	0.339524	0.190064	0.0332204	0.108185	-0.036739	-0.181167	1.45134	1.8563	1.28748	0.469674	0.887773	0.999712	0.889948	0.975557	0.771607	1.13e-05	7.04e-07	6.34e-05
NZ_CP011454.1	3116628	3118031	-	CDS	GEMMAAP_RS13185	WP_053333778.1	MFS transporter	4.81558	0.33916	0.128266	0.097709	-0.0366272	0.0171825	-0.0192382	0.625251	-0.164132	0.319802	0.128952	0.831981	0.916818	0.975613	0.977753	0.966527	8.91e-05	0.285739	0.0299819
NZ_CP011454.1	2181471	2181815	-	CDS	GEMMAAP_RS09175	WP_026850793.1	integration host factor subunit beta	6.46534	0.339076	0.14018	0.100003	-0.173743	-0.246049	-0.19249	-0.687043	-0.748568	-0.771127	0.154635	0.83143	0.916058	0.577712	0.354003	0.500522	0.00011044	7.04e-05	3.39e-05
NZ_CP011454.1	4338246	4338863	-	CDS	GEMMAAP_RS18295	WP_026850886.1	YigZ family protein	6.65602	0.338723	-0.170385	-0.0997218	0.098027	0.29644	-0.0318955	-0.480995	0.243593	-0.263002	0.0960986	0.707059	0.916818	0.729929	0.164801	0.950597	0.000889201	0.0821541	0.0531579
NZ_CP011454.1	3618143	3618709	+	CDS	GEMMAAP_RS15295	WP_075071544.1	DUF305 domain-containing protein	6.67629	0.33844	1.30789	0.772787	0.401472	0.398203	0.251895	2.41327	2.61775	1.98505	0.512383	0.00914076	0.331049	0.513201	0.458977	0.687084	1.2e-07	7.93e-08	1.5e-06
NZ_CP011454.1	2744210	2745556	-	CDS	GEMMAAP_RS11690	WP_043580687.1	MATE family efflux transporter	4.84713	0.338296	0.274117	0.323275	0.247767	-0.159818	0.206994	1.16097	0.842768	1.46813	0.58437	0.862947	0.854737	0.758044	0.841032	0.794239	0.00195072	0.0243337	0.000243502
NZ_CP011454.1	1096134	1096868	+	CDS	GEMMAAP_RS04555	WP_145979002.1	nucleotidyltransferase domain-containing protein	6.94278	0.33783	-0.385335	-0.361984	0.0842143	-0.0671601	-0.232664	0.0819212	0.294127	0.0728195	0.375204	0.579398	0.622653	0.891572	0.918965	0.62037	0.742222	0.246446	0.774416
NZ_CP011454.1	1331809	1332327	-	CDS	GEMMAAP_RS05570	WP_053334222.1	TetR/AcrR family transcriptional regulator	5.18616	0.337732	0.274055	0.141766	0.266114	0.239826	0.120244	1.03592	0.319895	1.21542	0.249939	0.62092	0.89705	0.465127	0.45127	0.765949	3.12e-06	0.0979532	3.33e-07
NZ_CP011454.1	2198401	2199882	-	CDS	GEMMAAP_RS09265	WP_043581649.1	leucyl aminopeptidase	7.50051	0.336935	-0.22485	-0.187079	-0.289178	-0.24875	-0.301746	0.396711	0.0757772	0.131965	0.186935	0.684674	0.746922	0.335741	0.382355	0.287987	0.0209406	0.688194	0.436589
NZ_CP011454.1	2054572	2054910	+	CDS	GEMMAAP_RS08545	WP_158514787.1	ribosomal L7Ae/L30e/S12e/Gadd45 family protein	6.81959	0.336787	-0.173783	-0.129217	0.0765837	0.349062	0.0401155	-1.23247	-0.876744	-1.3293	0.149222	0.748441	0.849967	0.824629	0.154651	0.927797	2.33e-08	6.8e-06	8.54e-09
NZ_CP011454.1	131916	132824	+	CDS	GEMMAAP_RS00570	WP_026849013.1	MBL fold metallo-hydrolase	3.73573	0.336612	0.150261	0.344628	-0.295848	-0.146576	-0.202038	0.720236	0.0198005	0.693957	0.33515	0.874263	0.676795	0.508568	0.734081	0.63659	0.00108892	0.940895	0.00217605
NZ_CP011454.1	3369092	3369385	-	CDS	GEMMAAP_RS14290	WP_026848649.1	4a-hydroxytetrahydrobiopterin dehydratase	5.4633	0.336342	0.352684	0.445027	-0.0145149	0.147352	0.0126888	2.13093	1.73796	2.27888	0.328161	0.538762	0.489359	0.989687	0.724369	0.994055	2.51e-10	1.59e-08	9.53e-11
NZ_CP011454.1	1693331	1693954	-	CDS	GEMMAAP_RS07030	WP_082821135.1	aminoacyl-tRNA hydrolase	6.32254	0.335375	-0.0214166	0.0872981	-0.402678	0.0373331	-0.103523	-0.244722	0.111022	-0.758591	0.228255	0.981151	0.954565	0.221816	0.945536	0.795584	0.173448	0.575316	0.000228177
NZ_CP011454.1	1495414	1495899	+	CDS	GEMMAAP_RS06155	WP_026850264.1	GNAT family N-acetyltransferase	5.77328	0.334746	-0.140761	-0.393605	-0.263312	-0.434544	-0.449901	0.112838	-0.150046	-0.356733	0.226733	0.860884	0.434737	0.450204	0.125438	0.126086	0.52884	0.43054	0.0510135
NZ_CP011454.1	4173961	4174632	-	CDS	GEMMAAP_RS17595	WP_026848170.1	hypothetical protein	5.19548	0.33403	0.249222	0.0690072	0.218925	0.0982155	0.0585069	0.458554	0.0395003	0.617588	0.208434	0.624409	0.978552	0.513201	0.777937	0.896706	0.00819272	0.844203	0.000815302
NZ_CP011454.1	2699991	2701358	-	CDS	GEMMAAP_RS11505	WP_053334118.1	amino acid permease	5.65289	0.33372	-0.0819073	0.0409537	0.467211	0.12596	0.196384	0.674391	0.453833	0.502454	0.205915	0.927502	0.992231	0.129353	0.702736	0.526499	0.000258466	0.0115145	0.00474279
NZ_CP011454.1	4597486	4597992	+	CDS	GEMMAAP_RS19340	WP_026848843.1	type VI secretion system contractile sheath small subunit	6.35057	0.332702	0.123392	0.175127	0.230415	0.230592	0.382247	1.032	0.761984	1.04344	0.239827	0.884722	0.823223	0.517834	0.462023	0.196049	3.06e-06	0.000246361	2.79e-06
NZ_CP011454.1	3925902	3926576	+	CDS	GEMMAAP_RS20100	WP_158514904.1	sigma-70 family RNA polymerase sigma factor	4.29323	0.332697	-0.0785218	-0.188755	0.119515	0.427512	0.106716	-0.334003	-0.852124	-0.613575	0.392776	0.942652	0.899484	0.839919	0.279086	0.857333	0.163542	0.0019535	0.0187303
NZ_CP011454.1	3310659	3311642	+	CDS	GEMMAAP_RS14045	WP_053333730.1	pyridoxal-phosphate dependent enzyme	5.22484	0.332688	0.148803	0.0995712	0.141944	0.274805	0.10398	-0.13872	-0.674418	0.0269009	0.141262	0.788098	0.913822	0.645751	0.250267	0.737073	0.343207	0.000117848	0.866943
NZ_CP011454.1	1973362	1974342	+	CDS	GEMMAAP_RS08175	WP_053334422.1	hypothetical protein	4.75118	0.332333	0.165121	-0.0369616	-0.118374	-0.110385	-0.0479965	0.888879	0.564513	0.852048	0.144605	0.748441	0.992231	0.71915	0.702736	0.961459	8.62e-07	0.000534542	2.11e-06
NZ_CP011454.1	1587294	1587419	-	CDS	GEMMAAP_RS06595	WP_158514756.1	hypothetical protein	9.48432	0.332208	0.286736	0.133169	0.924935	0.869674	0.714508	0.712829	1.36825	0.609867	0.312426	0.66909	0.904391	0.0112424	0.00484413	0.0499587	0.00154591	1.06e-06	0.00536728
NZ_CP011454.1	4624764	4625192	+	CDS	GEMMAAP_RS20710	WP_053333819.1	arsenite efflux transporter metallochaperone ArsD	4.27701	0.331509	-0.0820618	0.408352	-0.296223	-0.00250885	0.0352048	1.65395	1.38402	1.73721	0.495562	0.949411	0.704628	0.648573	0.999236	0.972391	1.36e-06	3.26e-05	7.98e-07
NZ_CP011454.1	4469440	4470834	-	CDS	GEMMAAP_RS18820	WP_075071573.1	hypothetical protein	4.05492	0.329579	0.334495	-0.124705	0.331351	0.216437	0.43956	0.923798	0.834905	0.974287	0.424306	0.677951	0.966084	0.506492	0.647607	0.291625	0.00041984	0.00180877	0.000328365
NZ_CP011454.1	2748535	2749524	+	CDS	GEMMAAP_RS11710	WP_026849629.1	peptidyl-alpha-hydroxyglycine alpha-amidating lyase family protein	4.45686	0.328959	0.0552646	0.329736	0.561899	-0.138445	0.324669	0.238019	0.454024	-0.118567	0.258951	0.947067	0.564129	0.0974413	0.70149	0.287987	0.182704	0.0173983	0.538476
NZ_CP011454.1	3690875	3692179	+	CDS	GEMMAAP_RS15615	WP_082821392.1	ATP-binding cassette domain-containing protein	7.3393	0.327992	-0.133319	-0.20119	-0.0480478	-0.0922164	-0.153208	0.84543	0.679739	0.797379	0.154526	0.835874	0.667755	0.902725	0.764712	0.607413	4.64e-06	0.000131181	1.03e-05
NZ_CP011454.1	4658659	4659246	-	CDS	GEMMAAP_RS19605	WP_145979260.1	DinB family protein	4.25861	0.327323	0.25572	0.233993	0.154399	0.134198	0.212983	0.451219	0.0389249	0.767807	0.29053	0.684674	0.753665	0.714229	0.818263	0.548811	0.0183506	0.960277	0.000280776
NZ_CP011454.1	4552950	4553384	+	CDS	GEMMAAP_RS19180	WP_026851012.1	protoporphyrinogen oxidase HemJ	4.24614	0.327058	0.136399	-0.184617	0.0737338	1.29994	0.153341	0.69111	0.481812	0.765147	0.705017	0.947067	0.981429	0.965476	0.0639185	0.89937	0.119675	0.312752	0.0935389
NZ_CP011454.1	4097069	4097551	+	CDS	GEMMAAP_RS17280	WP_145979211.1	hypothetical protein	6.78439	0.32613	0.080606	0.0349267	-0.478646	-0.075589	-0.349607	1.15195	0.706589	1.11735	0.191499	0.92505	0.992231	0.111219	0.83172	0.196049	1.41e-07	0.000192589	2.12e-07
NZ_CP011454.1	2851293	2852225	+	CDS	GEMMAAP_RS12095	WP_026849571.1	hypothetical protein	4.60538	0.325897	0.0687252	0.155559	-0.0958235	-0.241768	0.231028	0.738495	0.302367	0.797601	0.51575	0.959814	0.956137	0.909898	0.685388	0.708082	0.0144101	0.341295	0.0103
NZ_CP011454.1	4129240	4131087	+	CDS	GEMMAAP_RS17400	WP_053333556.1	serine/threonine protein kinase	8.26328	0.325808	-0.141857	-0.0856709	-0.287673	-0.276092	-0.273118	1.24876	1.53723	1.51282	0.469344	0.922539	0.985589	0.605045	0.593257	0.618666	0.000117893	1.74e-05	1.13e-05
NZ_CP011454.1	2592436	2593569	+	CDS	GEMMAAP_RS11015	WP_202969117.1	hypothetical protein	5.20949	0.32557	-0.157589	-0.0912139	-0.292288	-0.280689	-0.621512	-0.114338	-0.464406	-0.255042	0.165174	0.785735	0.933954	0.318701	0.26942	0.0267875	0.458348	0.00537021	0.102604
NZ_CP011454.1	4645996	4646316	-	CDS	GEMMAAP_RS19540	WP_026848876.1	hypothetical protein	2.90052	0.325322	0.494161	-0.534833	0.0564756	0.0947285	0.145238	0.151059	-0.0635641	0.201884	0.505524	0.512375	0.630888	0.957123	0.893476	0.824646	0.595126	0.852173	0.50446
NZ_CP011454.1	2791806	2792690	-	CDS	GEMMAAP_RS11860	WP_202969122.1	tRNA (guanosine(37)-N1)-methyltransferase TrmD	6.20472	0.325073	-0.175018	0.190879	0.363465	0.409071	0.414435	1.22454	2.04765	1.63793	0.185334	0.763419	0.747756	0.206525	0.0982154	0.108256	2.59e-08	2.15e-11	2.55e-10
NZ_CP011454.1	1541137	1542282	+	CDS	GEMMAAP_RS06390	WP_026850299.1	J domain-containing protein	8.31002	0.324795	-0.424383	-0.234356	-0.272269	-0.449824	-0.557109	-0.429243	-0.478805	-0.798375	0.350967	0.426947	0.752824	0.508568	0.206564	0.125864	0.055224	0.0402501	0.000883743
NZ_CP011454.1	4502924	4503340	-	CDS	GEMMAAP_RS18975	WP_026850982.1	SRPBCC domain-containing protein	3.74328	0.32424	0.327506	0.254235	-0.185604	0.425647	0.449941	0.891184	0.766586	1.04618	0.335523	0.569171	0.761392	0.682876	0.191277	0.175575	6.19e-05	0.000591866	1.15e-05
NZ_CP011454.1	1042261	1042632	+	CDS	GEMMAAP_RS04335	WP_026850095.1	hypothetical protein	5.52245	0.324046	0.199212	0.749741	0.305795	-0.156797	0.235001	0.148516	0.242543	0.31617	0.364536	0.829247	0.144094	0.471792	0.72238	0.577533	0.505127	0.301134	0.156967
NZ_CP011454.1	1119713	1120234	+	CDS	GEMMAAP_RS04625	WP_145979003.1	DUF3192 domain-containing protein	7.30232	0.323718	-0.121188	-0.141148	-0.195557	-0.0769357	-0.155311	-0.115418	-0.367007	-0.327829	0.185787	0.864223	0.83523	0.530208	0.824464	0.623419	0.481477	0.0314765	0.044661
NZ_CP011454.1	3120286	3120621	+	CDS	GEMMAAP_RS13205	WP_053333776.1	hypothetical protein	1.58329	0.323364	-0.255968	-0.381988	-0.465693	-0.0988422	-0.612445	0.0905908	-0.217177	-0.735876	0.650182	0.891095	0.87489	0.596334	0.928874	0.395099	0.812633	0.611437	0.0946274
NZ_CP011454.1	2674861	2675835	+	CDS	GEMMAAP_RS11410	WP_082821256.1	deoxyribonuclease IV	4.82424	0.322703	0.179682	-0.0445896	-0.131675	-0.0586239	0.0361563	0.464392	-0.0628601	0.567701	0.176841	0.740878	0.999712	0.700714	0.868919	0.937697	0.00348862	0.718496	0.000716913
NZ_CP011454.1	3542101	3542496	-	CDS	GEMMAAP_RS14965	WP_053333683.1	MerC domain-containing protein	4.67024	0.322448	-0.499091	0.083727	-0.0517552	-0.389655	-0.0999435	-0.338907	-0.693365	-0.514929	0.409292	0.394377	0.985589	0.94695	0.351008	0.870642	0.163209	0.00936243	0.0440063
NZ_CP011454.1	1175169	1175708	+	CDS	GEMMAAP_RS04850	WP_075071430.1	phosphoribosyltransferase domain-containing protein	6.86881	0.322143	-0.0541736	0.0749514	0.237177	0.154594	0.153423	1.80578	1.00858	1.48959	0.196823	0.941504	0.963331	0.440254	0.613412	0.63239	1.05e-10	1.83e-06	2.16e-09
NZ_CP011454.1	154105	154275	+	CDS	GEMMAAP_RS20190	WP_158514674.1	hypothetical protein	7.165	0.321724	0.332024	2.14392	0.156505	-0.125987	0.138351	4.54981	5.05524	4.79543	0.859989	0.939094	0.286366	0.95744	0.965555	0.95558	2.3e-05	1.41e-05	1.25e-05
NZ_CP011454.1	4491645	4493297	-	CDS	GEMMAAP_RS18920	WP_053334605.1	serine/threonine protein kinase	4.24216	0.321254	-0.147005	0.0489081	0.497782	0.33376	0.27538	0.516773	-0.136624	0.502528	0.393642	0.89517	0.993197	0.231221	0.390915	0.513033	0.0246476	0.597664	0.0340898
NZ_CP011454.1	2678642	2679250	+	CDS	GEMMAAP_RS11420	WP_026849671.1	hypothetical protein	3.91721	0.319593	-0.201093	-0.0502961	0.0102633	-0.145771	-0.00443302	0.329699	-0.189226	0.169985	0.300659	0.782377	0.992231	0.991909	0.70149	0.997347	0.079503	0.35815	0.387262
NZ_CP011454.1	1350132	1353065	+	CDS	GEMMAAP_RS05635	WP_202969192.1	glycosyl hydrolase	6.08897	0.319275	0.298439	0.397421	0.437856	0.713607	0.187767	0.515623	0.888634	0.600016	0.432499	0.73864	0.620658	0.352062	0.070267	0.718531	0.0414824	0.00149478	0.020417
NZ_CP011454.1	2286252	2287133	-	CDS	GEMMAAP_RS09670	WP_026850723.1	translation elongation factor Ts	7.14948	0.318589	-0.153222	-0.0971995	0.238791	0.463081	0.254023	-0.44008	0.059401	-1.0044	0.203613	0.81985	0.922233	0.424699	0.0702871	0.375829	0.00952109	0.750738	1.52e-06
NZ_CP011454.1	2719319	2719795	-	CDS	GEMMAAP_RS11585	WP_026849646.1	hypothetical protein	5.20819	0.317246	0.311087	-0.23232	0.182658	-0.152024	0.0431869	-1.15077	-1.30038	-0.920594	0.370066	0.64064	0.798162	0.69556	0.727827	0.948499	1.47e-05	6.39e-06	0.000316255
NZ_CP011454.1	3851965	3852564	-	CDS	GEMMAAP_RS16295	WP_075071551.1	DUF1697 domain-containing protein	4.13998	0.317123	0.0117393	0.0446932	0.0501343	-0.00781494	-0.119028	0.578599	0.10872	0.35882	0.299803	0.994826	0.992231	0.923922	0.996924	0.776207	0.00284274	0.602708	0.0623108
NZ_CP011454.1	2933788	2934378	+	CDS	GEMMAAP_RS12440	WP_026849521.1	hypothetical protein	8.61366	0.317054	-0.404391	-0.445842	-0.0811913	-0.387636	-0.519103	0.995043	1.22466	0.862849	0.555329	0.718734	0.648602	0.922064	0.496616	0.363232	0.00418114	0.00105313	0.010967
NZ_CP011454.1	1267635	1268468	+	CDS	GEMMAAP_RS20500	WP_158514742.1	hypothetical protein	5.33363	0.316762	0.355751	0.228013	0.44728	0.246291	0.225431	1.16238	0.497362	1.28624	0.165174	0.27187	0.648602	0.0981721	0.318983	0.383411	1.56e-08	0.0019491	3.41e-09
NZ_CP011454.1	2988829	2990058	-	CDS	GEMMAAP_RS12670	WP_053334058.1	MFS transporter	3.87049	0.316522	0.327683	0.216084	0.333025	0.441448	0.392644	0.765229	0.735791	0.722025	0.352204	0.584834	0.833372	0.401326	0.181718	0.250705	0.000438912	0.00108588	0.00119503
NZ_CP011454.1	4497431	4498045	-	CDS	GEMMAAP_RS18950	WP_158514932.1	hypothetical protein	3.72332	0.316238	0.289863	0.64303	0.679404	0.371387	0.4793	0.532327	0.450918	0.426575	0.328302	0.623121	0.183039	0.0642966	0.24538	0.128699	0.00709501	0.0277717	0.035658
NZ_CP011454.1	68796	69392	-	CDS	GEMMAAP_RS00295	WP_082820937.1	Uma2 family endonuclease	4.6919	0.31612	0.239696	0.190225	0.59827	0.117256	0.450861	0.271742	0.158232	0.282358	0.349871	0.741563	0.848977	0.113759	0.785131	0.184865	0.184607	0.479086	0.179751
NZ_CP011454.1	1721781	1722269	-	CDS	GEMMAAP_RS07145	WP_026850415.1	hypothetical protein	3.87789	0.316006	0.277399	0.293267	-0.308199	-0.134979	-0.0870005	0.842267	0.129137	0.836232	0.343896	0.666782	0.683596	0.461212	0.742078	0.863847	0.000119995	0.559466	0.000192098
NZ_CP011454.1	4264021	4264425	-	CDS	GEMMAAP_RS17975	WP_026848112.1	hypothetical protein	6.68936	0.31561	0.214406	1.03289	0.0242918	0.141142	0.357725	0.225899	0.272337	0.271714	0.555329	0.887328	0.155432	0.985588	0.840544	0.545116	0.485787	0.426339	0.401271
NZ_CP011454.1	1679794	1680945	-	CDS	GEMMAAP_RS06965	WP_075071455.1	hypothetical protein	8.62568	0.315583	-0.109378	-0.0202681	-0.0559697	0.247054	-0.0225127	-0.710131	-0.334264	-1.09613	0.148305	0.864082	0.999712	0.871284	0.306562	0.960611	2.73e-05	0.0287036	4.8e-08
NZ_CP011454.1	4622929	4623810	+	CDS	GEMMAAP_RS19435	WP_026848859.1	hypothetical protein	3.49551	0.315159	0.0680887	0.0980463	0.00243217	0.2291	0.291344	0.0615459	-0.404812	-0.0775126	0.352975	0.942652	0.968624	0.999704	0.536127	0.423646	0.77126	0.0679961	0.798934
NZ_CP011454.1	3018623	3019867	+	CDS	GEMMAAP_RS12795	WP_026849465.1	ROK family transcriptional regulator	4.44645	0.314868	-0.167034	-0.301443	-0.304786	-0.291841	-0.27337	0.513841	0.301577	0.304866	0.232589	0.791958	0.596936	0.352594	0.304856	0.357175	0.0028816	0.0826626	0.0720394
NZ_CP011454.1	3436055	3436867	-	CDS	GEMMAAP_RS14555	WP_075071537.1	SDR family oxidoreductase	6.13182	0.314539	0.0530454	-0.0164965	0.0597806	-0.250266	-0.131093	0.383809	-0.0615389	0.154424	0.162688	0.941504	0.999712	0.999455	0.313106	0.654546	0.0105888	0.710274	0.295667
NZ_CP011454.1	147914	149185	-	CDS	GEMMAAP_RS00655	WP_043580086.1	ATP-binding protein	6.95959	0.31429	0.147396	0.44953	0.137417	0.0698673	0.192979	2.46046	2.01751	2.62802	0.379157	0.890865	0.480746	0.786665	0.902207	0.666057	1.93e-10	8.74e-09	6.77e-11
NZ_CP011454.1	3763383	3763985	-	CDS	GEMMAAP_RS15915	WP_043579389.1	Spy/CpxP family protein refolding chaperone	8.57369	0.314216	-0.0252275	0.167702	-0.405761	-0.124182	-0.247345	-1.34089	-1.22284	-1.23007	0.718687	0.997092	0.980175	0.664268	0.927534	0.816689	0.00890058	0.0194249	0.0149799
NZ_CP011454.1	2727814	2728473	-	CDS	GEMMAAP_RS11625	WP_043580689.1	ribonuclease HII	8.30749	0.312981	-0.214602	-0.175742	0.00841058	0.366987	0.0527346	-0.41869	0.396161	-0.479692	0.31891	0.772486	0.831733	0.993088	0.266549	0.927651	0.0397723	0.0602574	0.0193868
NZ_CP011454.1	2963619	2964608	-	CDS	GEMMAAP_RS12575	WP_026849498.1	electron transfer flavoprotein subunit alpha/FixB family protein	6.89653	0.312551	0.110662	0.173642	0.0736402	0.0133785	0.13373	0.702108	0.357581	0.648324	0.172781	0.864314	0.737209	0.984334	0.987458	0.654546	4.63e-05	0.0242365	0.000123287
NZ_CP011454.1	50138	50449	+	CDS	GEMMAAP_RS00220	WP_053333858.1	DUF1905 domain-containing protein	3.83847	0.312427	-0.156965	0.158694	0.334096	0.197597	0.0773736	0.866096	0.581588	0.84002	0.4427	0.89517	0.92985	0.490933	0.676055	0.906704	0.000686372	0.0223157	0.00131083
NZ_CP011454.1	140800	141234	+	CDS	GEMMAAP_RS00615	WP_026849015.1	PIN domain-containing protein	4.47356	0.312078	-0.173071	-0.078631	0.236956	0.0767731	-0.0893996	0.194447	-0.00389441	0.178035	0.221891	0.773772	0.966084	0.452369	0.826067	0.804117	0.221724	0.985525	0.27787
NZ_CP011454.1	3611549	3612685	-	CDS	GEMMAAP_RS15260	WP_043579425.1	zinc-dependent alcohol dehydrogenase family protein	4.65483	0.31188	0.274883	-0.121005	0.0249374	0.155722	0.241811	0.649664	0.515371	0.700082	0.232589	0.541771	0.912423	0.980085	0.615191	0.408085	0.000262201	0.00363365	0.000148724
NZ_CP011454.1	1231987	1233936	-	CDS	GEMMAAP_RS05100	WP_053334243.1	serine/threonine protein kinase	8.30586	0.311839	-0.183914	-0.362718	-0.502247	-0.476832	-0.642794	0.508892	0.23522	0.384121	0.505663	0.893174	0.683113	0.327833	0.327988	0.181469	0.0814989	0.447832	0.182331
NZ_CP011454.1	1542282	1542806	+	CDS	GEMMAAP_RS06395	WP_026850300.1	hypothetical protein	7.34022	0.311286	-0.596009	-0.382143	-0.249239	-0.554146	-0.682464	-1.02711	-1.01908	-1.49063	0.430645	0.294937	0.599741	0.613901	0.165701	0.103276	0.000263711	0.000433984	3.17e-06
NZ_CP011454.1	424162	426855	+	CDS	GEMMAAP_RS01890	WP_026849201.1	carbohydrate binding family 9 domain-containing protein	5.7844	0.310756	0.436687	0.48559	0.179518	0.0627983	0.107211	1.93594	1.69326	2.17434	0.489086	0.569171	0.564863	0.765502	0.937763	0.875011	1.34e-07	1.76e-06	2.4e-08
NZ_CP011454.1	876717	877436	-	CDS	GEMMAAP_RS03705	WP_026850195.1	PEP-CTERM sorting domain-containing protein	13.1898	0.310388	-0.00524223	-0.0104165	0.0363752	0.103564	0.0917007	-0.44446	0.0509311	-0.669389	0.158517	0.999855	0.999712	0.920255	0.717624	0.771607	0.00381713	0.759947	5.99e-05
NZ_CP011454.1	2444063	2444440	-	CDS	GEMMAAP_RS10370	WP_026849821.1	30S ribosomal protein S11	7.44897	0.309681	-0.130233	-0.219896	0.10793	0.522351	0.161128	-0.3163	0.372379	-0.543208	0.283235	0.874895	0.721199	0.790027	0.0715837	0.663088	0.0909902	0.0566004	0.0054214
NZ_CP011454.1	4040391	4040972	+	CDS	GEMMAAP_RS17030	WP_026848248.1	hypothetical protein	5.54223	0.309405	-0.00737452	-0.144805	-0.0287508	-0.0126833	-0.0488513	1.53236	1.18818	1.52416	0.282121	0.999855	0.886205	0.984168	0.991367	0.925222	5.19e-09	6.07e-07	6.3e-09
NZ_CP011454.1	3430092	3432404	+	CDS	GEMMAAP_RS14535	WP_026848611.1	3-hydroxyacyl-CoA dehydrogenase/enoyl-CoA hydratase family protein	7.38985	0.308539	0.266168	0.418044	0.106512	0.2284	0.342011	1.02431	0.985297	1.15015	0.185334	0.513552	0.212186	0.740054	0.374705	0.170744	2.9e-07	9.86e-07	4.65e-08
NZ_CP011454.1	2468395	2469930	+	CDS	GEMMAAP_RS10525	WP_026849799.1	sodium:solute symporter	8.13182	0.308002	-0.265663	0.223921	-0.113791	-0.334215	-0.105266	-0.0112594	-0.471339	-0.0910788	0.203613	0.541981	0.631957	0.728771	0.192966	0.756112	0.947554	0.00620069	0.578226
NZ_CP011454.1	1375045	1375359	+	CDS	GEMMAAP_RS05705	WP_026849875.1	transcriptional regulator	4.88657	0.30741	-0.150109	-0.268672	-0.0763244	-0.235079	-0.00599742	0.180974	0.33939	0.25708	0.256473	0.836481	0.649956	0.862205	0.421817	0.999579	0.281823	0.0560266	0.135048
NZ_CP011454.1	822174	823343	-	CDS	GEMMAAP_RS03500	WP_026850223.1	acyl-CoA dehydrogenase family protein	6.97435	0.307326	0.147418	0.32373	0.0071469	-0.0132605	-0.034807	1.23037	0.602557	1.26388	0.119184	0.74417	0.303894	0.991142	0.981948	0.925222	1.22e-09	7.96e-05	6.75e-10
NZ_CP011454.1	493882	494520	-	CDS	GEMMAAP_RS02140	WP_026849235.1	LON peptidase substrate-binding domain-containing protein	4.37465	0.306368	0.0744778	0.099589	-0.030735	-0.235928	-0.131067	0.919845	0.647259	1.03454	0.34388	0.941504	0.964366	0.967256	0.505368	0.760968	3.35e-05	0.00235489	9.03e-06
NZ_CP011454.1	2239138	2239914	+	CDS	GEMMAAP_RS09465	WP_053334512.1	tRNA pseudouridine(38-40) synthase TruA	8.19031	0.305764	0.0460093	0.175841	0.152112	0.0160037	0.00221987	0.558826	0.129894	0.662591	0.297088	0.958971	0.801771	0.682901	0.987443	0.998911	0.00444955	0.524341	0.00103378
NZ_CP011454.1	2815985	2816833	+	CDS	GEMMAAP_RS11955	WP_082821271.1	M48 family metallopeptidase	6.78206	0.305666	-0.525774	-0.334615	-0.126474	-0.39691	-0.493813	-0.348422	-0.748902	-0.839544	0.392811	0.306365	0.633528	0.803359	0.293494	0.185942	0.124544	0.00275809	0.000785682
NZ_CP011454.1	3129097	3130530	+	CDS	GEMMAAP_RS13260	WP_026848808.1	TolC family protein	0.543889	0.305234	-0.276864	0.415088	0.338567	-0.0966435	0.356309	1.36783	1.01733	0.637215	0.837103	0.938883	0.938921	0.824925	0.967278	0.79348	0.0104985	0.0820246	0.309136
NZ_CP011454.1	1263588	1264892	+	CDS	GEMMAAP_RS05295	WP_026849944.1	PilT/PilU family type 4a pilus ATPase	7.97551	0.304049	0.186133	0.502299	0.0102196	-0.0787585	-0.107076	-0.874356	-0.964732	-0.80349	0.38974	0.848471	0.343923	0.992345	0.879801	0.835801	0.000404873	0.000218298	0.000949957
NZ_CP011454.1	1912775	1914655	+	CDS	GEMMAAP_RS07910	WP_026850527.1	hypothetical protein	7.09646	0.303689	0.0270509	-0.00684124	0.183336	0.0606977	0.0699795	0.551723	0.656621	0.642371	0.121809	0.964279	0.999712	0.444657	0.826969	0.807189	0.000130304	2.66e-05	2e-05
NZ_CP011454.1	1159070	1160137	+	CDS	GEMMAAP_RS04780	WP_026850028.1	hypothetical protein	5.21707	0.303602	0.263612	0.384231	0.0817451	-0.105782	0.189089	1.1725	0.466264	1.44694	0.355012	0.701532	0.53523	0.879506	0.806818	0.63659	1.94e-06	0.0285348	9.26e-08
NZ_CP011454.1	2606246	2607004	-	CDS	GEMMAAP_RS11120	WP_053334141.1	arylesterase	6.24842	0.302756	-0.389523	-0.108076	-0.16972	-0.234896	-0.379058	-0.330922	-0.550389	-0.523725	0.297112	0.3701	0.927238	0.658898	0.459385	0.212044	0.0733706	0.00589354	0.00708093
NZ_CP011454.1	4504607	4506259	-	CDS	GEMMAAP_RS18985	WP_053334608.1	serine/threonine protein kinase	6.10946	0.302538	0.0913973	0.351896	0.238056	0.288527	0.332556	0.415299	0.279572	0.518176	0.21432	0.902625	0.419012	0.415542	0.261501	0.194989	0.0094929	0.0871179	0.00192189
NZ_CP011454.1	1712063	1712956	+	CDS	GEMMAAP_RS07105	WP_026850408.1	sugar phosphate isomerase/epimerase	4.74953	0.302211	0.326456	0.160035	-0.129085	0.112923	0.254277	0.125458	-0.0743301	0.158836	0.232589	0.38868	0.922242	0.719394	0.72238	0.36353	0.435664	0.68078	0.332946
NZ_CP011454.1	3661718	3662320	+	CDS	GEMMAAP_RS15495	WP_043579414.1	HD domain-containing protein	4.53828	0.30213	-0.166436	0.0410244	0.175287	-0.0554864	0.0804488	-0.611646	-0.827947	-0.453645	0.344977	0.848471	0.993197	0.672992	0.919824	0.87133	0.00343089	0.000377934	0.0304245
NZ_CP011454.1	2469927	2470877	+	CDS	GEMMAAP_RS10530	WP_026849798.1	hypothetical protein	7.66574	0.302097	-0.0945231	-0.00619091	-0.0172708	-0.170675	-0.0796395	0.213227	-0.436037	0.093233	0.141199	0.874917	0.999712	0.972581	0.466332	0.792055	0.117161	0.00323702	0.498222
NZ_CP011454.1	4711475	4712431	+	CDS	GEMMAAP_RS19860	WP_026848925.1	hypothetical protein	7.48931	0.301491	0.312374	0.317716	-0.0578861	0.0111532	0.092053	-0.134367	-0.347885	-0.0405227	0.228248	0.426947	0.467816	0.888824	0.991367	0.798459	0.414103	0.0425321	0.816054
NZ_CP011454.1	4258438	4261068	-	CDS	GEMMAAP_RS17955	WP_026848115.1	multicopper oxidase domain-containing protein	4.6599	0.300744	-0.350244	-0.114164	0.289083	-0.0766986	-0.0158406	0.299375	0.112994	0.219661	0.253422	0.37264	0.916818	0.350144	0.83172	0.980519	0.0671206	0.527849	0.188875
NZ_CP011454.1	2589965	2590744	-	CDS	GEMMAAP_RS11005	WP_026849731.1	beta-ketoacyl-ACP reductase	4.07505	0.300611	-0.00350896	0.155811	0.337913	0.0333602	0.0916116	0.186138	-0.269978	0.182383	0.344233	0.999855	0.889337	0.361841	0.956047	0.841953	0.332241	0.194169	0.361343
NZ_CP011454.1	3439136	3439594	-	CDS	GEMMAAP_RS14570	WP_043579450.1	acyl-CoA thioesterase	5.59213	0.300247	0.441128	0.272856	-0.115263	-0.0293465	-0.0729944	1.25631	0.551527	1.16669	0.353116	0.328548	0.693232	0.810034	0.967664	0.88934	6.1e-07	0.00942563	2.06e-06
NZ_CP011454.1	3399740	3400783	+	CDS	GEMMAAP_RS14415	WP_075071535.1	CehA/McbA family metallohydrolase	5.61286	0.300114	0.0650907	0.1912	0.0152351	-0.14443	0.295471	-0.455432	-0.466563	-0.721394	0.294715	0.941504	0.795649	0.984334	0.679494	0.343629	0.0138752	0.0160762	0.000444581
NZ_CP011454.1	4199679	4201091	+	CDS	GEMMAAP_RS17720	WP_026848153.1	Glu/Leu/Phe/Val dehydrogenase	5.96236	0.300001	0.0492947	-0.131482	0.301981	0.328841	0.077299	0.197249	0.710597	0.159261	0.176841	0.941504	0.847642	0.247022	0.152583	0.811691	0.16861	3.69e-05	0.27407
NZ_CP011454.1	2287345	2288307	-	CDS	GEMMAAP_RS09675	WP_043581641.1	30S ribosomal protein S2	8.9092	0.299064	-0.0999848	-0.0328723	-0.0304635	0.20738	0.0672375	-0.797657	-0.0185997	-1.13298	0.203613	0.891812	0.992231	0.946903	0.431101	0.860884	1.47e-05	0.921095	8.27e-08
NZ_CP011454.1	3862183	3862455	+	CDS	GEMMAAP_RS16355	WP_145979191.1	hypothetical protein	5.56247	0.298241	0.000749544	-0.104407	0.475838	0.184734	0.250948	0.776487	0.607915	0.896195	0.349871	0.999855	0.949126	0.179354	0.617112	0.479139	0.000284823	0.00416609	6.43e-05
NZ_CP011454.1	601800	602720	+	CDS	GEMMAAP_RS02675	WP_026849322.1	protein-methionine-sulfoxide reductase catalytic subunit MsrP	7.94449	0.297968	-0.146409	-0.181804	-0.0988874	-0.272617	-0.34827	0.0435613	-0.0875902	-0.406746	0.371824	0.880134	0.83523	0.838851	0.45562	0.343629	0.846325	0.714241	0.0569103
NZ_CP011454.1	590271	591242	+	CDS	GEMMAAP_RS02620	WP_026849312.1	prohibitin family protein	7.8061	0.297847	-0.383024	-0.0224105	-0.543098	-0.330188	-0.528526	1.69689	1.80479	1.98236	0.527255	0.689842	0.999712	0.302949	0.517453	0.27749	4.05e-06	3.36e-06	4.64e-07
NZ_CP011454.1	1132138	1132353	+	CDS	GEMMAAP_RS04675	WP_026850045.1	hypothetical protein	9.2582	0.297564	-0.176518	-0.446729	-0.440436	-0.458623	-0.520723	0.434938	0.807977	0.534398	0.641852	0.92705	0.693232	0.519513	0.470958	0.424153	0.237762	0.0389032	0.144349
NZ_CP011454.1	1442515	1442898	+	CDS	GEMMAAP_RS05955	WP_026849834.1	hypothetical protein	6.05741	0.296838	0.201701	0.0507571	0.013244	0.0546697	-0.00124742	0.707678	0.588216	0.494263	0.178744	0.652152	0.983208	0.983365	0.867856	0.998911	2.18e-05	0.000315282	0.00138662
NZ_CP011454.1	2783348	2785357	-	CDS	GEMMAAP_RS11830	WP_026849610.1	AAA family ATPase	6.36269	0.296792	0.165429	0.308243	0.343855	0.202776	0.357473	1.30126	0.779348	1.42453	0.329107	0.837412	0.599741	0.324114	0.552005	0.254125	1.86e-07	0.000305212	4.81e-08
NZ_CP011454.1	1095281	1096150	+	CDS	GEMMAAP_RS20715	WP_162493363.1	TPM domain-containing protein	7.5569	0.296216	-0.399614	-0.183045	-0.201638	-0.27494	-0.466617	0.464303	0.603249	0.503746	0.416869	0.526107	0.85815	0.661856	0.496616	0.220565	0.0467974	0.0143286	0.0312063
NZ_CP011454.1	3347148	3348521	-	CDS	GEMMAAP_RS14210	WP_026848661.1	Nramp family divalent metal transporter	5.67812	0.295733	-0.324898	0.10412	-0.256466	-0.152305	-0.159663	0.131052	-0.250403	-0.0783201	0.225971	0.385714	0.916793	0.390897	0.602171	0.604748	0.403734	0.129463	0.633789
NZ_CP011454.1	3866730	3867338	-	CDS	GEMMAAP_RS16370	WP_026848347.1	PH domain-containing protein	6.63272	0.295519	0.0878003	0.199413	0.408542	0.139821	0.222842	1.19486	0.868021	1.13028	0.229043	0.912067	0.716106	0.149649	0.641383	0.426108	4.2e-08	9.28e-06	1.02e-07
NZ_CP011454.1	2717557	2719065	-	CDS	GEMMAAP_RS11580	WP_026849647.1	lytic transglycosylase domain-containing protein	5.08443	0.295484	0.0359788	0.372632	0.0926948	0.016346	-0.0609419	-0.28922	-0.737778	-0.304052	0.170672	0.953828	0.286366	0.765019	0.978478	0.860884	0.0397723	2.16e-05	0.0360421
NZ_CP011454.1	4524925	4525689	-	CDS	GEMMAAP_RS19045	WP_026850993.1	copper resistance protein NlpE N-terminal domain-containing protein	5.33996	0.295127	-0.0879075	-0.0400588	-0.10316	-0.258484	-0.121666	0.555413	0.184845	0.787684	0.311465	0.926922	0.992231	0.810086	0.403069	0.754513	0.00302088	0.335344	0.000105332
NZ_CP011454.1	4691899	4692447	-	CDS	GEMMAAP_RS19775	WP_026848913.1	zf-HC2 domain-containing protein	8.87992	0.294452	-0.869503	-0.865095	-0.353186	-0.892422	-0.790598	0.315689	-0.0645665	-0.471986	0.551812	0.126463	0.181766	0.530208	0.0590014	0.109429	0.293502	0.85471	0.115018
NZ_CP011454.1	15736	17106	-	CDS	GEMMAAP_RS00075	WP_026848940.1	MFS transporter	5.04122	0.294355	0.0869865	-0.0528144	0.013878	-0.0282877	0.278211	0.691509	0.240228	0.684412	0.273632	0.921211	0.999712	0.985002	0.985467	0.342049	0.000180306	0.174831	0.000258883
NZ_CP011454.1	400271	400786	+	CDS	GEMMAAP_RS01795	WP_145978949.1	lipocalin-like domain-containing protein	4.07425	0.294304	0.463398	0.033136	0.200566	-0.156814	0.106572	0.0537143	0.35912	0.35273	0.419797	0.3701	0.999712	0.671936	0.727827	0.838668	0.81698	0.120473	0.120638
NZ_CP011454.1	2067166	2068764	+	CDS	GEMMAAP_RS19980	WP_158514788.1	peptidylprolyl isomerase	7.12919	0.293834	-0.548978	-0.342253	0.10022	-0.356699	-0.499137	-0.62763	-0.983846	-1.03366	0.393013	0.244995	0.596384	0.842946	0.329308	0.16403	0.00592161	0.00014129	5.19e-05
NZ_CP011454.1	151023	151514	+	CDS	GEMMAAP_RS00675	WP_043580318.1	DUF4440 domain-containing protein	5.49586	0.293685	-0.350099	-0.571949	-0.109013	-0.303814	-0.319429	-0.132002	0.37081	-0.137234	0.417422	0.600456	0.362997	0.842946	0.431101	0.426409	0.563506	0.112515	0.55984
NZ_CP011454.1	2695217	2695711	+	CDS	GEMMAAP_RS11475	WP_026849664.1	type II secretion system GspH family protein	5.7001	0.292895	0.0806559	-0.478382	-0.383165	-0.375178	-0.341737	-0.414593	-0.823572	-0.618991	0.419797	0.941504	0.480746	0.385032	0.327988	0.396856	0.0694367	0.00137943	0.0103476
NZ_CP011454.1	1587069	1587284	-	CDS	GEMMAAP_RS06590	WP_026850328.1	light-harvesting protein	10.8862	0.292496	0.307436	0.434926	0.491042	1.11364	0.782768	0.715312	1.33588	0.580565	0.4919	0.741517	0.538026	0.272531	0.00439951	0.0847679	0.00937118	3.74e-05	0.0306942
NZ_CP011454.1	799420	800289	-	CDS	GEMMAAP_RS03410	WP_026850233.1	alpha/beta hydrolase	5.19478	0.292146	0.103243	0.19073	0.34393	0.157346	0.0432927	0.0523919	0.050015	0.167395	0.270101	0.895311	0.768568	0.262186	0.615191	0.928544	0.761123	0.795489	0.324473
NZ_CP011454.1	636762	637574	-	CDS	GEMMAAP_RS02800	WP_043580186.1	GNAT family N-acetyltransferase	3.94155	0.291401	0.446469	0.547107	0.357299	0.441122	0.293924	0.54638	0.730998	0.827783	0.332384	0.262089	0.25291	0.300832	0.125952	0.357593	0.00338665	0.000344062	6.93e-05
NZ_CP011454.1	275809	277206	-	CDS	GEMMAAP_RS01225	WP_043580112.1	argininosuccinate lyase	5.99384	0.291022	0.168627	0.0451614	-0.102112	-0.00358714	0.023269	0.829173	0.448921	0.911443	0.20987	0.748441	0.98992	0.762223	0.999236	0.989226	3.89e-06	0.00513854	1.08e-06
NZ_CP011454.1	1242528	1244648	+	CDS	GEMMAAP_RS05140	WP_026849973.1	elongation factor G	10.2697	0.290227	-0.201521	-0.095807	0.0826692	0.347785	0.115494	-0.926704	0.122285	-1.10331	0.233832	0.708805	0.915867	0.810034	0.174694	0.728653	2.81e-06	0.477471	1.91e-07
NZ_CP011454.1	2641984	2642724	+	CDS	GEMMAAP_RS11270	WP_026849692.1	SIMPL domain-containing protein	6.3724	0.289843	-0.505723	-0.443003	-0.034639	-0.268566	-0.39655	-0.239978	-0.920958	-0.920472	0.509573	0.460052	0.596384	0.975078	0.584785	0.410819	0.375436	0.00247415	0.00205516
NZ_CP011454.1	300209	301030	-	CDS	GEMMAAP_RS01335	WP_026849120.1	SEC-C domain-containing protein	5.2797	0.289841	-0.0704724	-0.0837293	-0.261414	-0.0868056	-0.0214518	1.08335	0.754647	1.35402	0.415489	0.944556	0.981429	0.568269	0.861758	0.98032	1.73e-05	0.00159331	7.99e-07
NZ_CP011454.1	662292	663587	+	CDS	GEMMAAP_RS02875	WP_043580192.1	MFS transporter	3.58808	0.289524	0.0672761	0.155871	0.322858	0.120786	0.337997	-0.204056	0.404353	-0.200172	0.468661	0.949411	0.927238	0.492013	0.810249	0.419557	0.38976	0.0983794	0.430088
NZ_CP011454.1	3892496	3892738	-	CDS	GEMMAAP_RS16450	WP_026848333.1	hypothetical protein	5.11053	0.288973	0.157358	-0.115064	-0.0540033	-0.0893251	-0.193404	1.2849	0.971003	1.49011	0.465621	0.891095	0.966226	0.946494	0.872852	0.691922	5.53e-06	0.000312686	7.21e-07
NZ_CP011454.1	1427634	1428140	+	CDS	GEMMAAP_RS05900	WP_026849843.1	response regulator transcription factor	4.26071	0.288903	0.271938	0.448227	0.104012	0.0112883	-0.115276	1.39809	1.47106	1.28889	0.451619	0.73864	0.537139	0.862731	0.996447	0.828842	5.87e-07	6.03e-07	2.71e-06
NZ_CP011454.1	4242137	4242838	-	CDS	GEMMAAP_RS17890	WP_145979224.1	hypothetical protein	3.85155	0.288213	0.301182	0.306183	0.377296	0.464492	0.213294	1.59864	0.978358	1.79745	0.475909	0.713027	0.749974	0.413421	0.228276	0.65529	1.23e-07	0.000235454	2.39e-08
NZ_CP011454.1	4541639	4542319	+	CDS	GEMMAAP_RS19135	WP_026851005.1	response regulator transcription factor	4.758	0.28793	0.086973	0.287668	0.253868	0.166255	0.212088	0.613874	0.306024	0.693573	0.32161	0.926657	0.630888	0.470499	0.620392	0.514056	0.00107213	0.099122	0.000400178
NZ_CP011454.1	271374	271931	+	CDS	GEMMAAP_RS01195	WP_026849101.1	outer membrane beta-barrel protein	8.82916	0.286914	-0.0499081	-0.249484	-0.125542	-0.458991	-0.418465	0.864177	1.34411	0.784431	0.475909	0.965706	0.781442	0.821559	0.268746	0.335784	0.0013983	1.73e-05	0.00308884
NZ_CP011454.1	663587	665215	+	CDS	GEMMAAP_RS02880	WP_026849347.1	alpha%2Calpha-trehalase TreF	4.01206	0.286664	0.040246	0.339741	0.435762	0.293662	0.42163	-0.227812	0.160911	-0.409339	0.405483	0.965706	0.631957	0.259203	0.40668	0.217683	0.274742	0.472945	0.0666144
NZ_CP011454.1	3389680	3391221	-	CDS	GEMMAAP_RS14370	WP_043579457.1	PAS domain S-box protein	5.951	0.286466	-0.674325	-0.308524	0.0862633	-0.210255	-0.477593	-1.24194	-1.16129	-1.29447	0.264469	0.010014	0.522815	0.821458	0.458977	0.0897732	6.06e-08	3.86e-07	5.1e-08
NZ_CP011454.1	1234735	1235205	+	CDS	GEMMAAP_RS05110	WP_026849977.1	30S ribosomal protein S7	8.45901	0.28611	-0.112389	-0.267844	-0.79113	-0.258793	-0.503051	-0.877385	0.0901304	-1.00217	0.430645	0.925511	0.717474	0.0586049	0.525688	0.184283	0.000508686	0.728169	0.000120494
NZ_CP011454.1	709406	709885	+	CDS	GEMMAAP_RS20470	WP_158514706.1	hypothetical protein	8.57845	0.285466	0.744042	0.78584	0.70575	0.00935126	0.09506	3.46534	3.45653	3.6734	0.65962	0.391857	0.399723	0.275898	0.999236	0.927797	1.66e-08	3.55e-08	6.95e-09
NZ_CP011454.1	1375359	1376051	+	CDS	GEMMAAP_RS05710	WP_026849874.1	di-trans%2Cpoly-cis-decaprenylcistransferase	5.62814	0.284565	-0.0167303	-0.183055	-0.310643	-0.210471	-0.0970131	0.113357	0.278252	0.239008	0.253752	0.985307	0.768568	0.301837	0.439309	0.782726	0.477068	0.0912593	0.133627
NZ_CP011454.1	4268106	4268711	-	CDS	GEMMAAP_RS17990	WP_053333531.1	DUF305 domain-containing protein	5.35271	0.284364	0.123616	-0.0329931	0.156617	0.0594992	0.32742	1.21308	1.52121	1.22655	0.382593	0.895311	0.999712	0.727358	0.912396	0.348016	9.95e-07	6.38e-08	1.01e-06
NZ_CP011454.1	386934	388082	-	CDS	GEMMAAP_RS01720	WP_043580441.1	amidohydrolase	6.34379	0.283722	0.146972	0.185546	-0.0634872	0.0303908	0.0579745	1.46006	1.00729	1.41719	0.227628	0.79741	0.833372	0.871223	0.947294	0.880005	7.65e-10	5.47e-07	1.16e-09
NZ_CP011454.1	1389445	1390971	+	CDS	GEMMAAP_RS05770	WP_053334210.1	amidohydrolase family protein	5.71309	0.283521	0.0295929	0.0137591	0.0559666	0.140636	0.0883433	0.19672	0.233974	0.0426954	0.233832	0.965706	0.999712	0.88989	0.624967	0.794239	0.193112	0.142063	0.795779
NZ_CP011454.1	1283306	1285999	-	CDS	GEMMAAP_RS05385	WP_053334235.1	TonB-dependent receptor	4.32506	0.283049	-0.0491069	-0.31283	-0.139032	-0.221717	-0.0656632	0.181835	0.1919	-0.0155017	0.344233	0.952985	0.630888	0.738992	0.498842	0.890545	0.316237	0.326425	0.94134
NZ_CP011454.1	1281821	1282087	+	CDS	GEMMAAP_RS05375	WP_026849929.1	hypothetical protein	8.97443	0.282943	-0.177802	-0.1125	-0.399997	-0.088566	-0.273552	-2.27182	-2.08169	-2.21791	0.739309	0.941504	0.992231	0.654773	0.948348	0.786863	6.84e-05	0.000250424	8.59e-05
NZ_CP011454.1	3362113	3364569	+	CDS	GEMMAAP_RS14260	WP_026848653.1	DEAD/DEAH box helicase	1.87929	0.282817	0.252553	-0.345448	0.528771	-0.336986	0.112947	0.81605	0.303524	0.856238	0.710932	0.891812	0.911104	0.495709	0.673954	0.917047	0.0250467	0.457528	0.0285554
NZ_CP011454.1	2934390	2935124	+	CDS	GEMMAAP_RS12445	WP_026849520.1	hypothetical protein	8.74032	0.28272	-0.633271	-0.202952	-0.153674	-0.356605	-0.389734	-1.24279	-1.01634	-1.38711	0.464318	0.197315	0.838482	0.759567	0.382617	0.356415	1.73e-05	0.000285364	3.67e-06
NZ_CP011454.1	4020130	4021005	-	CDS	GEMMAAP_RS16945	WP_145979204.1	hypothetical protein	4.19852	0.282492	0.418308	0.258517	0.266799	0.25575	0.45425	-0.0838762	-0.467245	-0.0455955	0.416398	0.408924	0.752824	0.533082	0.488646	0.187575	0.699515	0.0402113	0.84702
NZ_CP011454.1	491231	492124	+	CDS	GEMMAAP_RS02125	WP_053333962.1	ABC transporter permease	5.96015	0.282376	-0.13053	-0.302043	-0.00663774	0.0765779	-0.103468	0.154995	0.37661	0.292454	0.316704	0.864314	0.594775	0.994121	0.843661	0.792792	0.379759	0.0414624	0.0988595
NZ_CP011454.1	1740575	1741504	+	CDS	GEMMAAP_RS07235	WP_053334370.1	16S rRNA (cytidine(1402)-2'-O)-methyltransferase	8.36977	0.282265	-0.245381	-0.0508032	0.0425061	-0.187359	-0.304272	-0.392866	-0.660009	-0.681165	0.397346	0.741517	0.992231	0.946494	0.642318	0.419557	0.0671686	0.0043533	0.00252804
NZ_CP011454.1	4485820	4486068	-	CDS	GEMMAAP_RS18900	WP_026850972.1	hypothetical protein	3.70909	0.281892	0.393754	0.648226	0.735284	0.551667	0.809143	0.81927	0.69551	0.761079	0.429595	0.460052	0.212186	0.0642966	0.0927952	0.0301904	0.000260521	0.00218063	0.000907643
NZ_CP011454.1	1631424	1631747	+	CDS	GEMMAAP_RS06770	WP_026850355.1	FKBP-type peptidyl-prolyl cis-trans isomerase	7.0261	0.281849	-0.0811678	-0.0260748	0.0637845	-0.155736	0.0611678	0.434039	0.0923334	0.544434	0.303422	0.928993	0.999712	0.885663	0.637032	0.89109	0.0147027	0.632974	0.00297173
NZ_CP011454.1	1488017	1488691	-	CDS	GEMMAAP_RS06125	WP_026850259.1	acyloxyacyl hydrolase	6.43283	0.281802	0.194739	0.880699	-0.00897044	-0.250617	-0.0212519	-0.258905	0.275292	-0.168461	0.525561	0.868311	0.152692	0.994232	0.620392	0.987018	0.337445	0.336029	0.545708
NZ_CP011454.1	1188868	1190355	+	CDS	GEMMAAP_RS04910	WP_082821075.1	glycerol kinase GlpK	7.51487	0.281447	-0.51599	-0.105421	0.0623458	-0.18732	-0.265294	-0.00520045	0.0587377	0.0316115	0.416918	0.299188	0.949415	0.913886	0.65364	0.505391	0.982839	0.817712	0.893724
NZ_CP011454.1	4485211	4485633	-	CDS	GEMMAAP_RS18895	WP_026850971.1	hypothetical protein	3.42469	0.281431	0.0840537	-0.121698	0.206125	-0.15142	0.278665	0.714974	0.437048	0.593123	0.4579	0.941504	0.964366	0.672336	0.742229	0.498062	0.00199463	0.062322	0.0117058
NZ_CP011454.1	145621	145782	+	CDS	GEMMAAP_RS20435	WP_158514672.1	hypothetical protein	4.85501	0.2813	0.221156	0.565268	-0.0762561	0.104405	0.0141608	0.308388	0.407552	0.43325	0.344233	0.733406	0.1947	0.87368	0.779897	0.987813	0.0872927	0.0324203	0.0209418
NZ_CP011454.1	4184967	4185428	-	CDS	GEMMAAP_RS20855	WP_202969164.1	hypothetical protein	1.95395	0.281257	0.170172	-0.0939434	-0.303292	0.0639057	0.379159	0.227164	0.453701	0.106543	0.699951	0.930028	0.992231	0.734459	0.956047	0.585528	0.525044	0.22594	0.79714
NZ_CP011454.1	4428032	4429393	-	CDS	GEMMAAP_RS18650	WP_026850935.1	MFS transporter	5.27794	0.281248	-0.00138101	0.341485	0.285621	0.255548	0.578647	0.524205	0.208677	0.509179	0.302194	0.999855	0.543071	0.369922	0.369937	0.0495021	0.00289066	0.242928	0.0043286
NZ_CP011454.1	3201860	3203143	-	CDS	GEMMAAP_RS13545	WP_026848763.1	TolC family protein	4.83124	0.281193	0.0982738	-0.0603436	-0.186552	0.496434	-0.323952	1.04898	1.46841	1.6175	0.350967	0.91699	0.990533	0.644402	0.0850902	0.316864	2.09e-06	2.75e-08	2.81e-09
NZ_CP011454.1	3961617	3962075	-	CDS	GEMMAAP_RS16720	WP_026848295.1	hypothetical protein	5.54785	0.281005	0.425981	-0.0660359	-0.184723	-0.0865681	0.0177035	0.485342	0.295473	0.394038	0.163045	0.0554242	0.992231	0.477113	0.741328	0.965832	0.000530712	0.0307945	0.00416411
NZ_CP011454.1	410400	411482	-	CDS	GEMMAAP_RS01850	WP_053333937.1	hypothetical protein	5.86797	0.280304	0.420977	-0.0174339	0.474073	0.604119	0.273204	0.867282	1.1306	0.813433	0.444442	0.459496	0.999712	0.242049	0.0891574	0.503063	0.000400125	3.13e-05	0.000883837
NZ_CP011454.1	3653653	3654402	+	CDS	GEMMAAP_RS15450	WP_026848484.1	Fe-S cluster assembly ATPase SufC	6.92226	0.28019	0.0981387	0.111663	0.437679	-0.711652	0.481627	-0.602787	-1.73923	-2.0026	0.667802	0.951665	0.985589	0.534858	0.245415	0.467379	0.107455	0.000181055	3.14e-05
NZ_CP011454.1	154362	154646	+	CDS	GEMMAAP_RS00695	WP_026849026.1	helix-hairpin-helix domain-containing protein	4.49009	0.279859	-0.282335	0.296492	0.322678	-0.119282	-0.00439364	1.4454	1.42542	1.35314	0.647693	0.853751	0.863695	0.650919	0.879801	0.998911	8.78e-05	0.000177517	0.000233442
NZ_CP011454.1	1767903	1768166	+	CDS	GEMMAAP_RS07345	WP_053334377.1	hypothetical protein	4.48693	0.279575	-0.0169478	0.0899784	0.00314163	0.0500388	0.100358	0.563572	0.45543	0.204232	0.419052	0.991568	0.978552	0.999455	0.936928	0.841138	0.00860465	0.0392282	0.347618
NZ_CP011454.1	2904750	2905253	-	CDS	GEMMAAP_RS12310	WP_053334075.1	NUDIX domain-containing protein	4.55856	0.279268	0.171362	0.212864	0.502112	0.51991	0.279736	0.84646	0.0225177	0.917033	0.342196	0.810395	0.838262	0.129353	0.0608311	0.373265	3.06e-05	0.976969	1.33e-05
NZ_CP011454.1	2599929	2601203	+	CDS	GEMMAAP_RS11060	WP_026849722.1	alpha/beta hydrolase	2.87381	0.278756	0.182264	0.325145	0.0374134	0.0818203	0.193836	0.813448	0.702545	1.52604	0.607864	0.895311	0.831988	0.975613	0.924078	0.767918	0.00557339	0.0217234	8.25e-06
NZ_CP011454.1	1594027	1595304	-	CDS	GEMMAAP_RS06630	WP_202969202.1	hypothetical protein	7.74207	0.278309	0.250806	0.196625	0.42572	0.152413	0.368629	0.898639	1.25529	1.10703	0.220942	0.536969	0.661674	0.102205	0.566805	0.126415	1.37e-06	1.77e-08	5.4e-08
NZ_CP011454.1	787544	788164	-	CDS	GEMMAAP_RS03355	WP_026849416.1	HDIG domain-containing protein	6.4636	0.277897	0.0984942	0.201994	0.0799929	0.290054	0.0284433	0.388019	0.317047	0.536992	0.399358	0.928979	0.803536	0.878221	0.406369	0.964544	0.0617627	0.143317	0.0118928
NZ_CP011454.1	402510	403259	-	CDS	GEMMAAP_RS01815	WP_026849192.1	hypothetical protein	5.80778	0.277416	0.00587354	0.256217	0.067695	-0.0351758	0.0936788	0.933452	0.570556	0.813633	0.264469	0.999855	0.599741	0.864907	0.940728	0.788957	1.47e-06	0.0010458	1.2e-05
NZ_CP011454.1	3440623	3441180	-	CDS	GEMMAAP_RS14580	WP_202969144.1	inosine/xanthosine triphosphatase	3.9076	0.277398	-0.076877	-0.123273	0.112049	0.181591	-0.0766191	0.0139767	-0.497371	0.287232	0.423263	0.941504	0.942628	0.824138	0.649777	0.969455	0.95001	0.0290881	0.179751
NZ_CP011454.1	3228218	3228940	-	CDS	GEMMAAP_RS13670	WP_026848744.1	TerC family protein	5.0268	0.277216	0.0393208	-0.0256843	-0.457056	-0.183892	-0.295981	-0.0206249	-0.401103	0.138051	0.379018	0.965706	0.999712	0.21218	0.617537	0.397476	0.92209	0.0538569	0.493286
NZ_CP011454.1	1967445	1968194	+	CDS	GEMMAAP_RS08150	WP_026850569.1	DNA repair protein RecO	4.34305	0.277172	0.121398	-0.186174	-0.438277	-0.249774	-0.331753	0.245766	-0.16817	0.435783	0.318409	0.871668	0.81393	0.179354	0.394971	0.251175	0.146038	0.360127	0.0140718
NZ_CP011454.1	1332663	1333217	+	CDS	GEMMAAP_RS05575	WP_043581038.1	hypothetical protein	2.39702	0.276986	0.0885493	-0.141691	0.0274466	-0.157529	-0.469175	-0.191205	-0.14103	-0.260109	0.576862	0.944556	0.985589	0.983205	0.790921	0.364155	0.497221	0.658142	0.39681
NZ_CP011454.1	3197043	3197441	+	CDS	GEMMAAP_RS13530	WP_026848765.1	hypothetical protein	7.96659	0.276676	-0.111349	-0.0887034	-0.264949	-0.484362	-0.358054	0.661966	0.432978	0.419187	0.397737	0.91699	0.964366	0.497148	0.144088	0.314838	0.0026666	0.0481259	0.0453166
NZ_CP011454.1	4684392	4685252	-	CDS	GEMMAAP_RS19745	WP_026848909.1	glutaminyl-peptide cyclotransferase	6.44639	0.276406	-0.210837	-0.0641984	0.138601	-0.143244	-0.192467	0.324715	-0.0777328	0.298833	0.192911	0.612953	0.964366	0.62719	0.567284	0.437911	0.0212166	0.61347	0.0340251
NZ_CP011454.1	2207618	2209414	-	CDS	GEMMAAP_RS09325	WP_053334521.1	RecQ family ATP-dependent DNA helicase	6.11977	0.275835	-0.111492	0.0856425	0.207725	0.110041	0.0423854	0.681948	0.451336	0.812086	0.185715	0.854147	0.919308	0.415507	0.673954	0.907008	1.56e-05	0.00223452	1.4e-06
NZ_CP011454.1	4308740	4309168	+	CDS	GEMMAAP_RS18150	WP_053334561.1	hypothetical protein	4.81995	0.275707	-0.197153	-0.253179	-0.00999079	-0.0122729	-0.158363	0.684589	0.532652	0.574207	0.373425	0.788098	0.737107	0.991909	0.997363	0.679234	0.000709924	0.0084218	0.00414838
NZ_CP011454.1	4585105	4585857	-	CDS	GEMMAAP_RS19305	WP_026851033.1	hypothetical protein	6.66582	0.275496	-0.318537	-0.0324987	0.0128181	-0.0397683	-0.280218	-0.172126	-0.313075	-0.22849	0.312635	0.471409	0.993197	0.985588	0.937868	0.353275	0.319655	0.0845665	0.188095
NZ_CP011454.1	2137990	2138589	-	CDS	GEMMAAP_RS08950	WP_026850825.1	aminodeoxychorismate/anthranilate synthase component II	5.71426	0.274472	-0.0329756	-0.121431	-0.0417094	0.0113368	0.0939356	-0.392491	-0.684195	-0.43181	0.190777	0.959182	0.874425	0.959961	0.987832	0.746863	0.00573847	3.98e-05	0.00337949
NZ_CP011454.1	4585968	4587812	+	CDS	GEMMAAP_RS19310	WP_053334628.1	serine/threonine protein kinase	7.27922	0.2742	0.166152	-0.148677	-0.0368495	-0.0372287	-0.0399407	0.639406	0.714302	0.504047	0.386522	0.849683	0.875558	0.957123	0.9513	0.94794	0.00250372	0.00131626	0.0141612
NZ_CP011454.1	4431747	4432130	+	CDS	GEMMAAP_RS18665	WP_026850938.1	RidA family protein	4.96898	0.273761	-0.0494883	0.273462	-0.0938895	0.368546	0.0288405	1.70265	1.47093	1.89438	0.273632	0.944556	0.7407	0.800668	0.132908	0.951849	6.21e-11	1.9e-09	1.49e-11
NZ_CP011454.1	3751205	3751519	-	CDS	GEMMAAP_RS15865	WP_026848427.1	hypothetical protein	5.77702	0.273479	0.0710936	-0.0480625	-0.0274294	0.675064	-0.0991535	0.489648	0.659447	0.521512	0.488485	0.947067	0.993197	0.976717	0.0715837	0.870097	0.042237	0.010023	0.0331474
NZ_CP011454.1	1308846	1309427	-	CDS	GEMMAAP_RS05490	WP_082821087.1	YceI family protein	4.24442	0.27317	0.30098	0.231217	-0.549405	0.05858	-0.107855	-0.138896	0.131613	-0.417894	0.413673	0.624409	0.793263	0.170144	0.918159	0.816709	0.50343	0.55864	0.0560332
NZ_CP011454.1	3652045	3653478	+	CDS	GEMMAAP_RS15445	WP_026848485.1	Fe-S cluster assembly protein SufB	8.22658	0.273103	0.0574259	0.38665	0.392329	-0.857362	0.393231	-0.575519	-1.46827	-1.80185	0.61472	0.965706	0.693232	0.497148	0.0900532	0.494285	0.0732184	0.000147346	8.53e-06
NZ_CP011454.1	2326529	2327539	-	CDS	GEMMAAP_RS09850	WP_026850700.1	phenylalanine--tRNA ligase subunit alpha	6.78499	0.273006	0.101825	0.190156	-0.182143	-0.0544404	-0.0531297	0.0018038	-0.0411854	-0.242906	0.326033	0.903163	0.764969	0.613901	0.902991	0.910897	0.992565	0.842297	0.168579
NZ_CP011454.1	429203	429559	-	CDS	GEMMAAP_RS01905	WP_026849203.1	metalloregulator ArsR/SmtB family transcription factor	4.81134	0.272872	0.945777	0.148598	0.42114	0.093587	0.515163	1.0789	1.45761	1.33492	0.543515	0.0230784	0.942423	0.39737	0.879382	0.225536	0.000143031	5.61e-06	1.21e-05
NZ_CP011454.1	2475180	2476028	-	CDS	GEMMAAP_RS10550	WP_145979094.1	hypothetical protein	8.43307	0.272794	-0.562888	-0.569109	-0.133571	-0.633181	-0.548238	-0.188962	-0.521166	-0.708538	0.475909	0.295323	0.315056	0.794657	0.0927952	0.16333	0.437123	0.0391687	0.00474279
NZ_CP011454.1	1236783	1238117	+	CDS	GEMMAAP_RS05120	WP_026849976.1	hypothetical protein	6.22921	0.272566	0.236526	0.0492026	0.116288	0.0289268	0.164809	0.131994	-0.0339082	0.240046	0.138706	0.415627	0.971133	0.642104	0.935255	0.44227	0.269432	0.807718	0.0484975
NZ_CP011454.1	3721390	3721821	-	CDS	GEMMAAP_RS15765	WP_026848440.1	SWIB/MDM2 domain-containing protein	8.58619	0.271966	0.445124	0.0730889	-0.390237	-0.361851	-0.28556	0.806156	0.258388	0.675494	0.392811	0.332216	0.975605	0.262186	0.280408	0.425968	0.000316875	0.226562	0.00173633
NZ_CP011454.1	3144318	3144866	-	CDS	GEMMAAP_RS13320	WP_053333767.1	ComEA family DNA-binding protein	4.28447	0.271688	0.139368	-0.102006	-0.197166	-0.237995	-0.123109	-0.324004	-0.56533	-0.367948	0.492103	0.902494	0.972791	0.713161	0.592526	0.822738	0.174593	0.0285348	0.139889
NZ_CP011454.1	2065714	2066475	-	CDS	GEMMAAP_RS08600	WP_082821187.1	UDP-2%2C3-diacylglucosamine diphosphatase	6.19708	0.271668	0.0323027	0.00416497	0.0548706	-0.00828327	-0.130513	0.562011	-0.0750349	0.662449	0.310041	0.965706	0.999712	0.901657	0.996447	0.702177	0.00152429	0.690705	0.000324797
NZ_CP011454.1	1612339	1613625	-	CDS	GEMMAAP_RS06700	WP_082821117.1	efflux RND transporter periplasmic adaptor subunit	8.35448	0.271537	-0.297225	-0.284935	-0.454537	-0.213926	-0.60012	-0.788185	-0.340731	-1.06442	0.508222	0.74002	0.735671	0.308638	0.657557	0.146725	0.00339716	0.203007	0.000202941
NZ_CP011454.1	3394734	3395189	-	CDS	GEMMAAP_RS14395	WP_026848633.1	YidB family protein	5.73101	0.271417	-0.048217	0.0637851	0.165137	0.128577	-0.0939668	1.03404	0.772752	1.27886	0.260657	0.944556	0.971133	0.602621	0.656151	0.779786	1.71e-07	2.32e-05	6.61e-09
NZ_CP011454.1	476608	477678	-	CDS	GEMMAAP_RS20465	WP_026849227.1	hypothetical protein	2.69205	0.271293	-0.0826029	0.40089	0.571237	0.173543	0.235954	1.79685	1.31986	1.80758	0.708421	0.963085	0.833372	0.420308	0.83172	0.770823	5.76e-06	0.000577305	8.58e-06
NZ_CP011454.1	1584959	1586062	-	CDS	GEMMAAP_RS06580	WP_082821114.1	photosynthetic reaction center subunit M	8.34139	0.271176	0.502712	0.173589	-0.071737	-0.0618324	0.125386	0.803791	1.36841	0.556339	0.34533	0.146492	0.798027	0.871223	0.885969	0.746863	9.99e-05	1.25e-07	0.00362808
NZ_CP011454.1	3862593	3865115	+	CDS	GEMMAAP_RS16360	WP_082821413.1	TonB-dependent receptor	5.32437	0.271139	0.0392345	-0.108324	0.325743	-0.0988442	0.161926	-0.200769	-0.205445	-0.338727	0.2963	0.959182	0.916818	0.266576	0.76539	0.609426	0.215174	0.23406	0.0444701
NZ_CP011454.1	2548876	2549397	+	CDS	GEMMAAP_RS10830	WP_026849753.1	hypothetical protein	5.35643	0.271137	-0.164841	-0.142776	-0.55461	-0.196552	-0.408294	0.55494	-0.302208	0.219408	0.295314	0.789883	0.85815	0.0802909	0.492526	0.127016	0.00121893	0.0779865	0.179736
NZ_CP011454.1	32122	32805	-	CDS	GEMMAAP_RS00135	WP_043580269.1	OmpA family protein	4.70471	0.270963	-0.0165393	-0.130648	-0.049069	0.0728019	-0.138552	-1.00009	-1.18146	-1.59761	0.303422	0.986022	0.900789	0.913886	0.839636	0.675374	1.61e-06	3.86e-07	4.02e-09
NZ_CP011454.1	3974444	3974836	-	CDS	GEMMAAP_RS16775	WP_053333591.1	DUF4440 domain-containing protein	5.0603	0.270618	-0.549104	-0.222063	0.47204	-0.322116	0.208151	0.406123	-0.0707718	0.307489	0.476537	0.306365	0.84363	0.259203	0.422275	0.653257	0.0777397	0.792864	0.18835
NZ_CP011454.1	2763350	2764681	-	CDS	GEMMAAP_RS11760	WP_145979110.1	hypothetical protein	6.42298	0.270022	0.280533	0.290517	0.442943	-0.334725	0.590338	0.594287	0.997569	0.404767	0.375204	0.623121	0.630888	0.18297	0.297836	0.071257	0.00292626	1.83e-05	0.0368782
NZ_CP011454.1	1997794	1998345	+	CDS	GEMMAAP_RS08280	WP_026850588.1	bifunctional pyr operon transcriptional regulator/uracil phosphoribosyltransferase PyrR	5.62005	0.269664	0.199638	0.119713	0.0868311	0.0209486	0.0325293	0.624093	-0.13183	0.69608	0.203913	0.624409	0.853048	0.877465	0.987458	0.935259	5.28e-05	0.368163	1.49e-05
NZ_CP011454.1	783421	784539	+	CDS	GEMMAAP_RS03330	WP_158514711.1	outer membrane beta-barrel protein	5.72521	0.269648	1.52479	0.648531	0.206331	0.435444	0.0160984	2.43749	2.919	2.41091	0.647884	0.00167982	0.510086	0.783199	0.425104	0.99617	6.51e-08	1.19e-08	8.08e-08
NZ_CP011454.1	2958220	2958708	+	CDS	GEMMAAP_RS12560	WP_145979123.1	hypothetical protein	6.96124	0.269507	0.213945	-0.129103	-0.294265	-0.217329	-0.272038	0.649978	-0.598786	0.50325	0.269825	0.66909	0.854737	0.301837	0.415582	0.309167	0.000191985	0.000737329	0.00242947
NZ_CP011454.1	4269102	4269713	+	CDS	GEMMAAP_RS17995	WP_026848109.1	hypothetical protein	5.52695	0.26926	0.192895	0.051057	0.38393	0.217246	0.352013	0.787205	0.553423	0.808187	0.316704	0.741563	0.991629	0.200491	0.449848	0.196049	3.64e-05	0.00236333	3.14e-05
NZ_CP011454.1	3648125	3648736	+	CDS	GEMMAAP_RS15415	WP_053333661.1	isoprenylcysteine carboxylmethyltransferase family protein	7.55143	0.268427	-0.0199471	1.00654	-0.0695515	-0.434616	-0.214503	-0.244414	-0.00987217	-0.227071	0.718884	0.998826	0.305651	0.959697	0.55358	0.8135	0.557484	0.985525	0.588097
NZ_CP011454.1	609512	610165	-	CDS	GEMMAAP_RS02710	WP_053333982.1	nicotinamide riboside transporter PnuC	4.62657	0.2683	-0.041668	-0.0024509	-0.0452289	-0.0324212	-0.0803918	1.49375	0.716547	1.66217	0.383297	0.963031	0.999712	0.996122	0.956047	0.864141	1.08e-08	0.00055526	2.16e-09
NZ_CP011454.1	1587773	1588669	+	CDS	GEMMAAP_RS06605	WP_158514757.1	alpha/beta fold hydrolase	3.64347	0.268106	-0.0426416	0.000770243	-0.509966	-0.269648	-0.156867	0.70969	0.533553	0.740003	0.459436	0.968958	0.999712	0.240952	0.486571	0.738499	0.00149507	0.0184471	0.00143801
NZ_CP011454.1	145840	146817	-	CDS	GEMMAAP_RS00640	WP_026849018.1	SDR family NAD(P)-dependent oxidoreductase	4.85336	0.267168	-0.310741	-0.0765249	0.312317	-0.0813572	-0.150749	0.37209	0.160951	0.249595	0.426336	0.619511	0.984191	0.441529	0.861758	0.728653	0.0685426	0.466294	0.231516
NZ_CP011454.1	2171561	2172115	+	CDS	GEMMAAP_RS09120	WP_026850800.1	dCTP deaminase	7.41099	0.266551	0.00686685	0.0443209	0.249569	0.243864	0.290393	1.40416	1.31548	1.49177	0.312091	0.999855	0.992231	0.411325	0.386625	0.303857	9.41e-09	5.38e-08	3.28e-09
NZ_CP011454.1	2006026	2007000	+	CDS	GEMMAAP_RS08325	WP_026850593.1	AAA family ATPase	7.14137	0.266176	-0.325193	-0.230653	-0.300101	-0.418272	-0.431029	-0.0177884	-0.617273	-0.39782	0.376056	0.531075	0.718315	0.392526	0.171744	0.1692	0.931562	0.00313842	0.0397979
NZ_CP011454.1	299392	300204	-	CDS	GEMMAAP_RS01330	WP_026849119.1	peptidase E	5.51077	0.265722	0.170765	0.129605	-0.168219	0.128709	0.0110296	1.02689	0.511759	1.02167	0.31655	0.782377	0.884579	0.63272	0.687388	0.996617	6.31e-07	0.00383806	7.97e-07
NZ_CP011454.1	3711767	3711979	-	CDS	GEMMAAP_RS15715	WP_026848450.1	DUF350 domain-containing protein	4.89358	0.26559	-0.287296	-0.451759	-0.220678	-0.248118	-0.223509	-0.582148	-0.0879516	-1.00926	0.466777	0.705959	0.51547	0.647066	0.538516	0.610907	0.0116259	0.727384	0.000158642
NZ_CP011454.1	930232	931266	+	CDS	GEMMAAP_RS03890	WP_026850165.1	NAD(P)/FAD-dependent oxidoreductase	6.72659	0.265454	0.147736	0.132429	-0.102314	0.0944203	0.0310526	0.307914	-0.632603	0.438336	0.382593	0.862947	0.898192	0.811415	0.818046	0.957025	0.108245	0.00276233	0.0244021
NZ_CP011454.1	2994889	2995878	-	CDS	GEMMAAP_RS12695	WP_026849478.1	NTP transferase domain-containing protein	6.26555	0.265337	0.282274	0.220962	0.00104179	-0.04262	0.229622	0.710758	0.387637	0.731357	0.278579	0.483696	0.899484	0.999704	0.922091	0.403214	5.58e-05	0.0184377	4.31e-05
NZ_CP011454.1	2626715	2629192	-	CDS	GEMMAAP_RS11210	WP_158514829.1	TonB-dependent receptor	5.05656	0.265019	-0.443003	-0.616432	-0.146638	-0.609044	-0.448811	-0.96443	-0.923774	-1.32465	0.393642	0.316391	0.1947	0.73161	0.0454844	0.16333	2.56e-05	8.19e-05	6.32e-07
NZ_CP011454.1	3424394	3424945	+	CDS	GEMMAAP_RS14510	WP_053333707.1	RNA polymerase sigma-70 factor	6.3879	0.2649	0.0984319	-0.182152	-0.6299	-0.473714	-0.680005	-0.982356	-1.44847	-1.1388	0.723849	0.958971	0.966084	0.425238	0.508861	0.342049	0.0208895	0.00225012	0.0100015
NZ_CP011454.1	4006044	4006424	+	CDS	GEMMAAP_RS16900	WP_026848266.1	hypothetical protein	3.40282	0.264894	0.0594746	-0.0976632	0.0328473	0.224006	0.0568706	0.0461686	-0.333113	0.405475	0.559724	0.961347	0.985589	0.975613	0.655551	0.942666	0.867101	0.241434	0.130738
NZ_CP011454.1	370892	372187	+	CDS	GEMMAAP_RS01635	WP_026849166.1	metal-dependent hydrolase	5.9264	0.264821	0.129353	0.481156	0.0453783	-0.0412339	-0.0258683	0.985852	0.764924	1.41321	0.539009	0.922244	0.520636	0.959697	0.961819	0.979342	0.000405029	0.00540383	5.97e-06
NZ_CP011454.1	165049	166215	-	CDS	GEMMAAP_RS20450	WP_026849032.1	hypothetical protein	5.62958	0.264798	-0.856394	-0.548122	-0.690526	0.497257	-0.758027	0.671085	0.540803	-0.241437	0.572286	0.106184	0.52764	0.191629	0.270353	0.107809	0.0165434	0.0603699	0.394749
NZ_CP011454.1	2128426	2129262	-	CDS	GEMMAAP_RS08905	WP_082821557.1	LPS export ABC transporter ATP-binding protein	7.41021	0.264627	0.00975293	0.0539358	-0.146589	-0.247256	-0.123138	0.0409932	-0.345187	-0.252673	0.207739	0.999855	0.98462	0.587152	0.277475	0.654086	0.775207	0.0184639	0.0680805
NZ_CP011454.1	4639204	4641192	-	CDS	GEMMAAP_RS19505	WP_145979257.1	hypothetical protein	5.30295	0.264569	0.349025	0.274404	-0.088165	0.00274556	0.311261	0.8111	0.427564	0.987518	0.664001	0.779889	0.873857	0.925385	0.999236	0.637109	0.0173226	0.225124	0.00528519
NZ_CP011454.1	76731	77714	-	CDS	GEMMAAP_RS00325	WP_158514666.1	cytochrome P450	4.28667	0.264485	-0.265767	0.0198448	-0.0173914	-0.29054	0.153474	0.760712	0.35401	0.528133	0.393642	0.667739	0.999712	0.993088	0.376427	0.687384	0.000208082	0.0729457	0.00779765
NZ_CP011454.1	1522900	1524321	-	CDS	GEMMAAP_RS06285	WP_026850285.1	hypothetical protein	8.12112	0.264335	-0.219216	-0.0121444	0.0117777	-0.402484	-0.0143074	0.601608	0.641613	0.568831	0.355305	0.736802	0.999712	0.989249	0.167488	0.987018	0.00193015	0.00151831	0.00302582
NZ_CP011454.1	3056466	3057827	+	CDS	GEMMAAP_RS20315	WP_053334044.1	hemolysin family protein	6.6139	0.264195	-0.0210909	-0.0627915	0.343051	0.199455	0.180493	0.446399	0.31337	0.522034	0.214398	0.971468	0.964366	0.165408	0.390915	0.466918	0.00215308	0.0309797	0.000527697
NZ_CP011454.1	702538	703689	-	CDS	GEMMAAP_RS03035	WP_158514705.1	polysaccharide deacetylase family protein	6.61878	0.26414	-0.0980276	0.39694	-0.704494	-0.454584	-0.693882	-0.611347	-0.872089	-0.954523	0.586662	0.941504	0.660034	0.179097	0.35134	0.144899	0.037453	0.00608004	0.00254872
NZ_CP011454.1	245152	245550	+	CDS	GEMMAAP_RS01050	WP_053333902.1	helix-turn-helix domain-containing protein	2.6432	0.262275	-0.332125	0.0671723	-0.227763	-0.131737	-0.305956	0.173252	0.621812	0.447569	0.563891	0.730408	0.999712	0.70635	0.817942	0.537406	0.497221	0.0194307	0.0906235
NZ_CP011454.1	144647	145594	+	CDS	GEMMAAP_RS00635	WP_026849017.1	NmrA/HSCARG family protein	5.49087	0.262253	0.0279077	0.373003	-0.0552584	-0.107742	-0.0392883	1.44469	1.22089	1.47114	0.410381	0.971763	0.528702	0.918336	0.790221	0.948242	4.51e-08	1.22e-06	3.81e-08
NZ_CP011454.1	3608176	3608760	-	CDS	GEMMAAP_RS15245	WP_026848509.1	sigma-70 family RNA polymerase sigma factor	3.54242	0.261789	0.288922	0.162049	0.101103	-0.0575444	0.0680151	0.0829628	0.226577	-0.123609	0.477446	0.691261	0.911104	0.857845	0.9287	0.90875	0.711553	0.331161	0.649007
NZ_CP011454.1	309589	310578	-	CDS	GEMMAAP_RS01375	WP_082820965.1	ADP-ribosylglycohydrolase family protein	4.1245	0.261321	0.29809	0.202603	-0.372097	-0.0790313	-0.369524	2.1293	2.58299	2.14314	0.771164	0.874895	0.971133	0.713569	0.952019	0.676883	1.14e-05	1.64e-06	1.28e-05
NZ_CP011454.1	2777819	2778973	+	CDS	GEMMAAP_RS11805	WP_026849615.1	carboxypeptidase regulatory-like domain-containing protein	6.95351	0.260249	-0.289066	-0.339676	-0.116142	-0.422924	-0.348878	-0.143559	-0.713663	-0.802032	0.34822	0.556613	0.491516	0.759347	0.128906	0.225536	0.417938	0.000382432	7.23e-05
NZ_CP011454.1	1766646	1767896	+	CDS	GEMMAAP_RS07340	WP_026850445.1	aminotransferase class V-fold PLP-dependent enzyme	6.22739	0.259836	0.0112159	0.265167	0.171206	0.139718	0.194816	0.73723	0.816741	0.696384	0.172781	0.987737	0.467816	0.469319	0.524942	0.366337	1.46e-06	6.39e-07	3.71e-06
NZ_CP011454.1	3848461	3849075	-	CDS	GEMMAAP_RS16275	WP_026848363.1	hypothetical protein	4.31087	0.259486	-0.0982497	0.0820862	0.343517	-0.0952534	0.060109	-1.07985	-0.987987	-1.19609	0.333824	0.902367	0.999712	0.259203	0.780722	0.88934	6.49e-07	5.7e-06	4.01e-07
NZ_CP011454.1	2370823	2373744	-	CDS	GEMMAAP_RS10090	WP_026850664.1	TonB-dependent receptor	7.08793	0.259228	-0.100451	0.0884526	0.0830984	-0.115503	0.170887	0.364929	0.689409	0.229142	0.328266	0.89698	0.938313	0.824925	0.728268	0.601136	0.0319391	0.000320073	0.171504
NZ_CP011454.1	1575436	1575981	+	CDS	GEMMAAP_RS06535	WP_053334338.1	PRC-barrel domain-containing protein	8.05961	0.258931	0.264126	-0.0583997	0.036373	0.0354277	0.0634501	0.788315	0.586828	0.469919	0.328302	0.593122	0.980694	0.941009	0.945536	0.883745	4.84e-05	0.00164647	0.00710632
NZ_CP011454.1	3650561	3650974	-	CDS	GEMMAAP_RS15435	WP_026848486.1	hypothetical protein	7.53965	0.258669	0.171738	0.195611	0.197695	0.108042	0.185986	-0.0303945	-0.280825	-0.0602068	0.295314	0.765604	0.699997	0.500679	0.730024	0.517985	0.856317	0.0900781	0.715706
NZ_CP011454.1	3011531	3012643	-	CDS	GEMMAAP_RS12770	WP_026849469.1	glycine cleavage system aminomethyltransferase GcvT	6.56621	0.258251	0.149742	0.374322	0.083656	0.186747	0.286232	0.0634282	-0.0416394	-0.0979506	0.400459	0.862697	0.508576	0.857856	0.602871	0.402861	0.752573	0.855348	0.627209
NZ_CP011454.1	630755	632209	-	CDS	GEMMAAP_RS02775	WP_026849333.1	M20/M25/M40 family metallo-hydrolase	5.19976	0.257815	0.170643	0.170398	-0.0795192	-0.121489	0.0489712	1.43951	1.26038	1.44031	0.203995	0.691261	0.793794	0.793538	0.620392	0.932716	5.5e-11	1.47e-09	6.76e-11
NZ_CP011454.1	249921	251432	+	CDS	GEMMAAP_RS01075	WP_026849079.1	Gfo/Idh/MocA family oxidoreductase	6.80934	0.257736	0.0662169	-0.0172225	0.393815	0.0286151	0.325044	0.329402	0.531214	0.153595	0.33515	0.941504	0.999712	0.182476	0.956047	0.24089	0.0522668	0.00369866	0.365939
NZ_CP011454.1	4634795	4635925	-	CDS	GEMMAAP_RS19485	WP_158514940.1	Fic family protein	4.09994	0.25771	0.175911	0.253098	0.00267958	-0.0756432	0.0268494	0.485818	0.573535	0.582099	0.416491	0.82856	0.729887	0.999455	0.928291	0.964544	0.0115132	0.00496924	0.00400653
NZ_CP011454.1	2462368	2463009	-	CDS	GEMMAAP_RS10500	WP_053334178.1	CDP-alcohol phosphatidyltransferase family protein	7.15123	0.257466	0.201196	0.0226989	0.0884249	-0.0212974	0.084115	1.0412	0.885656	1.03337	0.189216	0.593122	0.993521	0.749685	0.958819	0.760968	1.56e-08	3.88e-07	1.61e-08
NZ_CP011454.1	3375185	3376015	-	CDS	GEMMAAP_RS14315	WP_082821579.1	phosphate ABC transporter ATP-binding protein	2.90346	0.257126	0.385206	0.0930923	0.449677	0.625139	0.152838	-0.701529	-0.647411	-0.692568	0.555329	0.595377	0.999712	0.341969	0.102872	0.783165	0.007739	0.0201922	0.0160043
NZ_CP011454.1	1662399	1662749	+	CDS	GEMMAAP_RS06900	WP_026850376.1	YlbF family regulator	6.06106	0.256935	-0.183708	-0.439643	-0.0167527	-0.126785	-0.140789	-0.293571	-0.169393	-0.489533	0.355781	0.778428	0.335456	0.981842	0.710762	0.68898	0.0942922	0.36457	0.00830973
NZ_CP011454.1	907685	909274	-	CDS	GEMMAAP_RS03810	WP_026850176.1	folate-binding protein YgfZ	8.23234	0.255894	0.00590779	-0.0170811	-0.0102154	0.0797991	0.0490531	0.5932	0.495467	0.90197	0.176017	0.999453	0.999712	0.984168	0.744088	0.91743	3.93e-05	0.000464059	8.76e-08
NZ_CP011454.1	4677962	4678861	+	CDS	GEMMAAP_RS19720	WP_026848905.1	DMT family transporter	4.26529	0.255826	0.21854	-0.0601631	0.168867	0.186481	0.155593	0.985933	0.489029	1.12879	0.380977	0.730408	0.999712	0.65709	0.559448	0.66219	2.9e-06	0.00927139	5.26e-07
NZ_CP011454.1	1696103	1699306	+	CDS	GEMMAAP_RS07045	WP_053334362.1	carboxypeptidase regulatory-like domain-containing protein	3.50066	0.255794	-0.101672	-0.242723	0.1218	0.091709	0.155844	0.616676	0.249864	0.723218	0.511423	0.931739	0.847642	0.824629	0.86029	0.790492	0.00667041	0.296643	0.00263616
NZ_CP011454.1	2027456	2027995	-	CDS	GEMMAAP_RS20305	WP_026850606.1	hypothetical protein	2.59911	0.255667	0.474538	0.164943	0.0200289	-0.545943	-0.211348	-1.04104	-0.856297	-1.13515	0.505524	0.358457	0.916058	0.999455	0.147388	0.639751	8.64e-05	0.00123552	0.000119567
NZ_CP011454.1	3151733	3153334	+	CDS	GEMMAAP_RS13330	WP_075071521.1	LptF/LptG family permease	6.85905	0.25559	-0.208805	-0.0731872	-0.00612808	-0.241486	-0.25622	-0.234181	-0.73064	-0.451911	0.185715	0.55924	0.927238	0.991951	0.244705	0.220133	0.0669347	5.72e-06	0.00103378
NZ_CP011454.1	3760830	3762062	+	CDS	GEMMAAP_RS15900	WP_026848421.1	XdhC family protein	7.07005	0.255344	0.151126	0.177266	0.447993	0.364507	0.319508	0.864827	0.699947	1.00993	0.252455	0.775578	0.708374	0.0802909	0.103625	0.173737	1.4e-06	4.45e-05	1.29e-07
NZ_CP011454.1	296492	297352	-	CDS	GEMMAAP_RS01315	WP_082820963.1	replication initiator protein A	7.71681	0.255108	0.0685167	0.190738	-0.06992	-0.0750327	-0.240229	1.10009	0.574979	1.22481	0.350849	0.941504	0.747756	0.871223	0.843661	0.437911	7.06e-07	0.00245389	1.29e-07
NZ_CP011454.1	4533396	4534118	-	CDS	GEMMAAP_RS19085	WP_075071575.1	cytochrome b/b6 domain-containing protein	0.696776	0.254557	-0.114021	-0.185755	-1.02091	0.221466	0.0879566	0.469744	0.505878	0.391169	0.875664	0.970361	0.992231	0.562068	0.896552	0.969455	0.45599	0.465196	0.585961
NZ_CP011454.1	2822515	2823189	+	CDS	GEMMAAP_RS11980	WP_026849587.1	uridine kinase	5.13546	0.254318	0.0713221	-0.0361219	-0.296141	-0.0589855	-0.220082	0.741729	0.101594	0.608504	0.35039	0.936874	0.996605	0.367852	0.882145	0.473601	7.67e-05	0.583771	0.000823683
NZ_CP011454.1	3710267	3711763	-	CDS	GEMMAAP_RS15710	WP_026848451.1	polyamine aminopropyltransferase	6.06227	0.253872	-0.036756	-0.275868	-0.041849	-0.112434	-0.0268973	-0.631718	-0.0867564	-0.783856	0.416869	0.965706	0.664495	0.946494	0.777937	0.964544	0.00236261	0.692481	0.000409976
NZ_CP011454.1	3547335	3547970	-	CDS	GEMMAAP_RS14995	WP_043579430.1	phosphatase PAP2 family protein	4.99449	0.2533	0.0647306	0.00447986	0.390366	0.199854	0.246294	0.614927	-0.0936769	0.69751	0.424306	0.941504	0.999712	0.266576	0.56931	0.48325	0.00236839	0.670101	0.00090085
NZ_CP011454.1	2131349	2131924	-	CDS	GEMMAAP_RS08915	WP_082821194.1	LPS export ABC transporter periplasmic protein LptC	6.31606	0.252774	-0.484198	-0.422329	-0.0345513	-0.0900754	-0.27502	-0.751931	-0.509181	-1.0134	0.328302	0.110708	0.300839	0.946463	0.786775	0.328935	5.93e-05	0.0041816	1.4e-06
NZ_CP011454.1	3302866	3303708	+	CDS	GEMMAAP_RS14000	WP_075071530.1	hypothetical protein	4.35091	0.252669	0.177894	-0.0716797	-0.47867	-0.349564	-0.271468	0.629228	0.172366	0.456875	0.392811	0.794878	0.981429	0.176026	0.249594	0.410819	0.00095849	0.371666	0.0148982
NZ_CP011454.1	8916	10331	+	CDS	GEMMAAP_RS00050	WP_082820929.1	GWxTD domain-containing protein	7.41877	0.25245	-0.196352	-0.18037	0.00258935	-0.209623	-0.125431	0.328307	-0.132747	-0.0460895	0.295314	0.705959	0.726682	0.999455	0.425104	0.682262	0.0356133	0.421058	0.777739
NZ_CP011454.1	4231537	4231938	-	CDS	GEMMAAP_RS17855	WP_026848132.1	hypothetical protein	3.87467	0.251861	0.297336	0.117889	0.655506	0.15654	0.12241	1.0565	0.742701	1.42092	0.484079	0.652152	0.952842	0.0951477	0.707344	0.796572	1.11e-05	0.00121997	1.82e-07
NZ_CP011454.1	3463128	3465677	+	CDS	GEMMAAP_RS14670	WP_026848591.1	endopeptidase La	7.32035	0.251051	-0.284752	-0.275719	-0.244491	-0.238137	-0.245216	-0.466829	-0.422096	-0.54859	0.381287	0.593122	0.602849	0.472636	0.441635	0.452101	0.0125294	0.0281339	0.00414752
NZ_CP011454.1	2068761	2069465	+	CDS	GEMMAAP_RS08625	WP_026850635.1	hypothetical protein	7.15207	0.250925	-0.56845	-0.341096	0.0859157	-0.311183	-0.455311	-1.04278	-1.28326	-1.39691	0.513433	0.287092	0.635073	0.885663	0.43971	0.244229	0.00011935	1.79e-05	3.46e-06
NZ_CP011454.1	2706431	2706919	+	CDS	GEMMAAP_RS11530	WP_053334196.1	5-(carboxyamino)imidazole ribonucleotide mutase	5.37832	0.250643	-0.0631228	-0.102044	-0.475432	-0.209352	-0.470554	0.0512775	-0.716201	-0.115415	0.457304	0.947067	0.962711	0.219402	0.582431	0.173737	0.81299	0.00206733	0.59513
NZ_CP011454.1	2768355	2768813	-	CDS	GEMMAAP_RS11770	WP_026849621.1	cytochrome c	6.85559	0.250594	-0.355922	-0.551336	-0.312563	-0.797639	-0.625447	-0.423795	-1.19443	-0.901784	0.631571	0.73864	0.51547	0.612198	0.0971444	0.21325	0.162108	0.000736841	0.00549845
NZ_CP011454.1	3406171	3406347	+	CDS	GEMMAAP_RS20620	WP_158514876.1	hypothetical protein	6.72827	0.250392	0.161325	-0.00684263	-0.265673	0.029954	0.0167472	1.3127	1.11862	1.39422	0.37104	0.828539	0.999712	0.426786	0.956047	0.980584	5.54e-08	1.21e-06	2.07e-08
NZ_CP011454.1	2602587	2603147	-	CDS	GEMMAAP_RS11070	WP_026849720.1	nitroreductase	4.15186	0.249916	0.142195	0.00688084	0.021711	0.166914	0.135858	-0.0438273	-0.373663	-0.0311436	0.410374	0.863696	0.999712	0.999455	0.636897	0.726186	0.821098	0.0594486	0.927852
NZ_CP011454.1	3643558	3643854	+	CDS	GEMMAAP_RS15390	WP_026848490.1	metal-sulfur cluster assembly factor	6.84613	0.249604	-0.189939	0.0109249	-0.184144	-0.35695	-0.275179	-0.111767	-0.210407	-0.330209	0.352204	0.752796	0.999712	0.582368	0.19429	0.3548	0.517971	0.242864	0.0553333
NZ_CP011454.1	2912303	2912782	-	CDS	GEMMAAP_RS12345	WP_026849534.1	D-tyrosyl-tRNA(Tyr) deacylase	3.54922	0.249582	0.13204	0.172269	-0.00501627	0.0235296	0.117827	0.7567	0.465598	0.969968	0.598192	0.92505	0.92985	0.999455	0.987136	0.860884	0.00457835	0.089336	0.000706195
NZ_CP011454.1	1905277	1906533	+	CDS	GEMMAAP_RS07890	WP_026850525.1	cell division protein FtsA	8.45363	0.249404	0.0845217	-0.0266001	0.212496	0.144703	0.075649	0.650397	0.545116	0.772875	0.231451	0.89517	0.992231	0.376429	0.552005	0.801137	3.65e-05	0.00041895	3.18e-06
NZ_CP011454.1	4041757	4042155	-	CDS	GEMMAAP_RS17040	WP_026848247.1	SgcJ/EcaC family oxidoreductase	4.23818	0.248954	-0.0528896	0.00812029	0.202378	0.214565	0.176645	0.766103	0.377829	0.620131	0.42903	0.95133	0.999712	0.610063	0.529364	0.63659	0.000193614	0.056782	0.00224472
NZ_CP011454.1	3764203	3766506	+	CDS	GEMMAAP_RS15920	WP_026848419.1	glutamine amidotransferase	6.50367	0.248677	-0.143038	-0.2337	0.00442383	-0.112612	-0.130138	0.0669985	0.203192	0.192571	0.380977	0.859825	0.697421	0.997859	0.750191	0.726691	0.715289	0.280935	0.280117
NZ_CP011454.1	3120653	3121285	-	CDS	GEMMAAP_RS13210	WP_145979132.1	hypothetical protein	4.9887	0.248319	-0.381541	-0.778597	-0.855914	-0.85919	-0.840074	0.0140514	-0.42128	-0.522312	0.522729	0.569171	0.187226	0.0685081	0.0167944	0.0487233	0.955561	0.0878563	0.0329133
NZ_CP011454.1	93041	93856	-	CDS	GEMMAAP_RS00385	WP_145978924.1	DUF3108 domain-containing protein	5.19979	0.248314	0.165703	0.0700729	0.0828393	-0.01567	0.0165513	1.17017	0.612581	1.34317	0.393642	0.828315	0.992231	0.854321	0.996073	0.981715	3.27e-07	0.00179396	4.49e-08
NZ_CP011454.1	3060500	3062737	+	CDS	GEMMAAP_RS12970	WP_053334043.1	ABC transporter ATP-binding protein/permease	6.7794	0.247437	-0.0894282	-0.0687574	-0.100066	0.0103255	-0.0491788	-0.748151	-0.993367	-1.28529	0.162688	0.863696	0.924105	0.672992	0.986399	0.86452	6.2e-07	1.77e-08	1.66e-10
NZ_CP011454.1	1783435	1784298	+	CDS	GEMMAAP_RS07405	WP_026850455.1	3-hydroxybutyryl-CoA dehydrogenase	5.71829	0.246908	-0.194112	0.099384	0.28015	0.332671	0.342811	0.374172	0.677873	0.574554	0.265902	0.667658	0.922233	0.281399	0.134025	0.129248	0.0090374	4.64e-05	0.000234475
NZ_CP011454.1	494520	495182	-	CDS	GEMMAAP_RS02145	WP_053333964.1	nitroreductase family protein	3.2335	0.246679	-0.162972	0.287175	-0.0652771	-0.409416	-0.35021	0.720954	0.436564	0.691865	0.51933	0.871668	0.750344	0.918764	0.293494	0.394458	0.00157494	0.0587868	0.00333068
NZ_CP011454.1	3071063	3072220	+	CDS	GEMMAAP_RS13025	WP_082821302.1	alanine racemase	5.94557	0.246499	0.202193	0.257167	0.372467	0.377173	0.498242	0.825941	0.345336	0.828237	0.332384	0.704858	0.605839	0.184961	0.131697	0.0657285	9.47e-06	0.0375927	1.03e-05
NZ_CP011454.1	837339	838388	+	CDS	GEMMAAP_RS03545	WP_158514718.1	glycosyltransferase	5.31276	0.246297	0.183747	0.14408	-0.171094	-0.116017	-0.111518	0.440109	0.25786	0.540351	0.250727	0.671107	0.798027	0.534923	0.655551	0.682262	0.00193015	0.0684885	0.000307296
NZ_CP011454.1	234557	235504	+	CDS	GEMMAAP_RS01020	WP_082820956.1	creatininase family protein	4.9665	0.246006	0.23702	0.171985	-0.309519	-0.395084	-0.0734415	1.05127	1.26585	1.14323	0.44696	0.736802	0.86309	0.434126	0.228534	0.888193	5.83e-06	7.99e-07	2.18e-06
NZ_CP011454.1	2331140	2331784	+	CDS	GEMMAAP_RS09880	WP_026850694.1	redox-sensing transcriptional repressor Rex	5.52465	0.24591	0.0874348	-0.0286658	-0.0443426	0.0111396	0.165103	0.635203	0.0497298	0.45284	0.541833	0.941504	0.999712	0.958693	0.996558	0.746863	0.00921362	0.858529	0.0612944
NZ_CP011454.1	1186922	1187701	-	CDS	GEMMAAP_RS04900	WP_026850007.1	enoyl-CoA hydratase/isomerase family protein	6.37708	0.245282	0.00652842	-0.168963	-0.127477	0.129457	0.0120437	0.564409	0.725055	0.502486	0.232941	0.998826	0.718315	0.645751	0.595154	0.981715	0.000127739	9.41e-06	0.000508902
NZ_CP011454.1	4050849	4052525	-	CDS	GEMMAAP_RS17085	WP_026848243.1	ankyrin repeat domain-containing protein	7.13438	0.245227	-0.0256151	0.23552	0.283017	0.0974204	0.183945	1.34201	1.17024	1.59991	0.379018	0.971468	0.667755	0.379485	0.786775	0.585494	3.96e-08	6.41e-07	2.31e-09
NZ_CP011454.1	4330299	4331486	-	CDS	GEMMAAP_RS18245	WP_082821475.1	patatin-like phospholipase family protein	7.29937	0.244769	0.00860232	0.0401366	0.279788	-0.159076	0.126674	0.851082	0.365353	0.802106	0.161823	0.991568	0.981429	0.165408	0.415679	0.554325	6.29e-08	0.00350667	1.46e-07
NZ_CP011454.1	3185423	3185794	+	CDS	GEMMAAP_RS13475	WP_026848773.1	hypothetical protein	7.42131	0.244673	-0.209717	-0.337389	-0.13048	-0.342558	-0.395847	0.0414265	0.115119	-0.00208275	0.652862	0.884074	0.755641	0.859904	0.534666	0.477635	0.89983	0.742386	0.994997
NZ_CP011454.1	2728504	2728860	-	CDS	GEMMAAP_RS11630	WP_026849642.1	50S ribosomal protein L19	8.7028	0.243982	-0.119542	-0.155991	0.0342548	0.346996	0.0380277	-0.259811	0.695168	-0.133571	0.393642	0.891095	0.833899	0.9518	0.244705	0.944423	0.156321	0.000721734	0.468644
NZ_CP011454.1	2889307	2889831	-	CDS	GEMMAAP_RS12235	WP_145979286.1	NADH-quinone oxidoreductase subunit C	5.41579	0.243449	-0.0292026	-0.210857	-0.315895	-0.253813	-0.081258	0.0173654	-0.119795	-0.371385	0.388681	0.968958	0.749974	0.349216	0.394971	0.845842	0.926894	0.531052	0.0414172
NZ_CP011454.1	610287	612413	+	CDS	GEMMAAP_RS02720	WP_043580180.1	TonB-dependent receptor	5.36565	0.243334	-0.274134	-0.295659	0.150391	0.0403988	0.00834718	0.353944	-0.441887	0.542259	0.516333	0.736802	0.724162	0.763856	0.953967	0.996617	0.114901	0.0663374	0.0191929
NZ_CP011454.1	1339194	1339994	+	CDS	GEMMAAP_RS05605	WP_026849891.1	carbon-nitrogen hydrolase family protein	6.83881	0.242697	-0.124393	0.247485	0.276853	0.164294	0.172741	1.32794	1.41732	1.47527	0.380977	0.871495	0.648602	0.388892	0.613412	0.610907	3.75e-08	2.97e-08	6.93e-09
NZ_CP011454.1	3622818	3624092	-	CDS	GEMMAAP_RS15315	WP_202969150.1	PQQ-dependent sugar dehydrogenase	7.07286	0.241776	-0.490811	-0.303747	-0.302658	-0.581595	-0.7542	-0.172025	-0.820606	-1.22322	0.61472	0.513722	0.75819	0.588792	0.198771	0.107809	0.545976	0.00736594	0.000181462
NZ_CP011454.1	515784	516719	-	CDS	GEMMAAP_RS02245	WP_145978959.1	hypothetical protein	7.08629	0.241774	-0.416941	-0.280443	-0.208046	-0.132456	-0.394064	0.00669454	-0.523586	-0.342181	0.433738	0.362374	0.635496	0.589458	0.730904	0.218992	0.97412	0.0118967	0.0797817
NZ_CP011454.1	4031507	4031923	+	CDS	GEMMAAP_RS16990	WP_145979206.1	TonB-dependent receptor plug domain-containing protein	4.53446	0.241641	0.163893	0.114262	0.176165	0.0895844	0.136996	1.32703	1.04348	1.31185	0.482898	0.860884	0.999594	0.694149	0.843661	0.771607	3.01e-07	2.03e-05	4.67e-07
NZ_CP011454.1	1172895	1173719	-	CDS	GEMMAAP_RS04835	WP_026850018.1	hypothetical protein	7.6926	0.24104	-0.273633	-0.292151	-0.420438	-0.580359	-0.545788	-0.253668	-0.430961	-0.590226	0.555698	0.758158	0.724162	0.350234	0.144088	0.184283	0.30891	0.0986423	0.0207083
NZ_CP011454.1	4383691	4384959	+	CDS	GEMMAAP_RS18480	WP_026850911.1	hypothetical protein	3.52765	0.240989	0.057274	-0.105367	-0.029978	0.217407	0.29661	0.373275	-0.109555	0.150407	0.544098	0.95852	0.980175	0.9753	0.613412	0.472766	0.0956902	0.67342	0.534998
NZ_CP011454.1	3263284	3265566	+	CDS	GEMMAAP_RS13820	WP_202969139.1	S9 family peptidase	6.61418	0.240903	0.0587849	-0.0114707	0.115214	-0.00212865	0.0342598	0.624521	0.530999	0.411785	0.232589	0.931656	0.999712	0.666599	0.999236	0.979101	3.25e-05	0.000337512	0.00278903
NZ_CP011454.1	3048773	3049600	-	CDS	GEMMAAP_RS12905	WP_026849447.1	hypothetical protein	1.24874	0.240591	-0.408435	0.124757	-0.422092	-0.519041	-0.00332719	-1.06603	-0.577371	-0.365926	0.73594	0.772261	0.991629	0.614736	0.429934	0.998911	0.00687595	0.144992	0.363521
NZ_CP011454.1	1904516	1905280	+	CDS	GEMMAAP_RS07885	WP_026850524.1	FtsQ-type POTRA domain-containing protein	7.50908	0.240481	0.040933	-0.0215328	0.244476	0.169474	0.00608793	0.542479	0.466886	0.701891	0.336574	0.953828	0.999712	0.393391	0.551515	0.996617	0.0013802	0.00628658	9.15e-05
NZ_CP011454.1	1605124	1606365	-	CDS	GEMMAAP_RS06670	WP_026850340.1	ABC transporter permease	7.82394	0.240128	-0.186324	-0.0875802	-0.0823837	0.00539927	-0.0517369	-0.0921216	-0.127909	-0.216749	0.231451	0.64064	0.897613	0.764643	0.996924	0.874793	0.48776	0.358385	0.0969798
NZ_CP011454.1	982870	985023	+	CDS	GEMMAAP_RS04100	WP_043581085.1	PBP1A family penicillin-binding protein	7.0882	0.23995	-0.183445	-0.272894	-0.112236	-0.242649	-0.238641	-0.50852	-0.707429	-0.565138	0.247608	0.667658	0.441089	0.676914	0.270353	0.290572	0.000504432	1.8e-05	0.000173233
NZ_CP011454.1	4274687	4275676	-	CDS	GEMMAAP_RS18025	WP_026848104.1	2-hydroxyacid dehydrogenase	4.59015	0.239216	0.0783732	-0.0561435	-0.156078	-0.128109	0.0325895	0.550287	0.447796	0.461632	0.440988	0.938883	0.999712	0.714952	0.737277	0.999579	0.00458293	0.0242228	0.0184149
NZ_CP011454.1	2970103	2971311	-	CDS	GEMMAAP_RS12595	WP_179947322.1	acyl-CoA dehydrogenase family protein	7.95045	0.238659	0.00700132	-0.185609	0.0128273	-0.07803	-0.128588	0.597348	0.373077	0.544496	0.328266	0.999855	0.708374	0.984168	0.812212	0.67656	0.000433494	0.0230726	0.00107393
NZ_CP011454.1	635500	636210	-	CDS	GEMMAAP_RS02790	WP_026849336.1	twin-arginine translocation signal domain-containing protein	7.01829	0.238469	0.246314	0.772108	-0.134773	-0.125366	0.122806	0.481408	0.412546	0.442451	0.481127	0.73864	0.0772985	0.765529	0.769413	0.792208	0.0238334	0.0604564	0.0368278
NZ_CP011454.1	55205	56575	+	CDS	GEMMAAP_RS00245	WP_082820934.1	M28 family peptidase	5.01382	0.238273	0.187326	-0.0418495	-0.338948	-0.336438	-0.169431	1.2442	1.03727	1.6478	0.74447	0.925009	0.999712	0.678383	0.644081	0.855755	0.00174318	0.00946603	0.000126652
NZ_CP011454.1	1174485	1174970	-	CDS	GEMMAAP_RS04845	WP_026850016.1	tetratricopeptide repeat protein	8.74948	0.237701	0.0190707	-0.242069	-0.00206209	-0.266402	0.0130381	0.672752	0.0723446	0.519824	0.376056	0.983871	0.628394	0.999455	0.354373	0.987814	0.000351668	0.70653	0.00366746
NZ_CP011454.1	512498	513115	-	CDS	GEMMAAP_RS02230	WP_026849247.1	hypothetical protein	7.08342	0.237318	-0.363076	-0.0712246	-0.202355	-0.421081	-0.28616	-0.244079	-0.34292	-0.253947	0.389883	0.37264	0.971133	0.546344	0.128577	0.343629	0.162108	0.0614927	0.14532
NZ_CP011454.1	1522114	1522869	-	CDS	GEMMAAP_RS06280	WP_026850284.1	hypothetical protein	7.84548	0.236902	-0.0585388	-0.167205	0.0255754	-0.566042	-0.0338313	0.0191373	0.0395868	-0.374934	0.393642	0.941504	0.801121	0.966331	0.0385316	0.950307	0.921077	0.85011	0.0364435
NZ_CP011454.1	1598345	1599250	+	CDS	GEMMAAP_RS06645	WP_026850337.1	DUF3623 family protein	6.81196	0.236836	0.184533	0.392817	0.44251	0.123262	0.324916	-0.326158	-0.0664907	-0.355399	0.41988	0.790303	0.429471	0.174446	0.736871	0.29473	0.0800655	0.752631	0.05868
NZ_CP011454.1	525501	526289	-	CDS	GEMMAAP_RS02305	WP_026849259.1	flagellar basal-body rod protein FlgG	7.47798	0.236501	0.00754271	-0.290708	-0.28075	-0.0830137	-0.236368	0.236874	-0.0755963	-0.151203	0.480457	0.999855	0.648602	0.477113	0.86029	0.539193	0.256605	0.750714	0.475061
NZ_CP011454.1	2418972	2420318	-	CDS	GEMMAAP_RS10275	WP_145979088.1	hypothetical protein	9.97422	0.236078	-0.263244	-0.187075	-0.0210322	-0.109227	-0.152038	-0.167393	-0.467212	-0.668394	0.366592	0.586197	0.726682	0.971535	0.741762	0.643007	0.316237	0.00889178	0.00027875
NZ_CP011454.1	3188492	3189031	-	CDS	GEMMAAP_RS13495	WP_053333758.1	CDP-alcohol phosphatidyltransferase family protein	6.38134	0.23604	-0.268501	-0.114923	-0.158613	-0.0929218	-0.250709	0.959389	0.275018	0.816067	0.393642	0.600456	0.916793	0.661856	0.797144	0.419557	4.6e-06	0.12972	4.31e-05
NZ_CP011454.1	77681	78250	-	CDS	GEMMAAP_RS00330	WP_026848979.1	hypothetical protein	4.30035	0.235844	-0.132807	-0.0124477	0.0874068	-0.0440899	-0.066041	1.02706	0.493311	0.750249	0.420903	0.864314	0.999712	0.840884	0.934723	0.88934	1.65e-06	0.00869446	0.000158069
NZ_CP011454.1	3979759	3980361	+	CDS	GEMMAAP_RS16795	WP_026848285.1	TetR/AcrR family transcriptional regulator	3.89152	0.235252	-0.0418802	-0.0969442	0.41299	0.140424	0.308361	1.28688	0.749646	1.18761	0.478716	0.964279	0.971133	0.256506	0.717624	0.366055	1.85e-07	0.00051628	9.47e-07
NZ_CP011454.1	981516	982802	-	CDS	GEMMAAP_RS04095	WP_026850133.1	tyrosine--tRNA ligase	6.24186	0.235101	0.070411	-0.0672007	0.174194	0.200982	0.0151884	0.287384	-0.460568	0.462413	0.349279	0.931656	0.968624	0.579773	0.457184	0.98032	0.0671732	0.00683896	0.00482992
NZ_CP011454.1	2726143	2726931	-	CDS	GEMMAAP_RS11615	WP_053334113.1	OmpA family protein	4.22636	0.23492	0.15864	0.182531	0.47567	0.455377	0.504926	0.657708	0.808394	0.685684	0.446901	0.840276	0.841938	0.163266	0.117182	0.0991531	0.00071879	0.000130195	0.000667267
NZ_CP011454.1	4297707	4298801	-	CDS	GEMMAAP_RS18110	WP_053333525.1	serine hydrolase	4.26972	0.234061	0.223215	0.0884916	-0.315745	0.246836	-0.00265007	-0.0521502	-0.321938	-0.306693	0.559724	0.811808	0.981855	0.522936	0.55904	0.998911	0.832351	0.201999	0.215894
NZ_CP011454.1	1178874	1179659	-	CDS	GEMMAAP_RS04870	WP_145979010.1	hypothetical protein	5.7144	0.233976	-0.414261	-0.420933	-0.665222	-0.717409	-0.679605	0.0694826	-0.517927	-0.443555	0.604644	0.593122	0.630888	0.181741	0.0891574	0.120336	0.798717	0.0626414	0.098729
NZ_CP011454.1	1209018	1210079	+	CDS	GEMMAAP_RS04995	WP_053334245.1	DUF1611 domain-containing protein	7.59282	0.233821	-0.138092	-0.0562483	-0.0646076	-0.214162	-0.0245442	0.166242	0.402314	0.249969	0.55015	0.902494	0.992231	0.915699	0.63219	0.9788	0.48776	0.103692	0.287841
NZ_CP011454.1	608973	609515	-	CDS	GEMMAAP_RS02705	WP_043580178.1	AAA family ATPase	4.57554	0.233497	0.0364001	0.0821995	-0.0367424	-0.280325	-0.161413	0.972423	0.597341	1.10239	0.405397	0.964279	0.966084	0.9753	0.343384	0.63659	2.26e-06	0.0014242	4.4e-07
NZ_CP011454.1	2328034	2328231	-	CDS	GEMMAAP_RS09860	WP_026850698.1	50S ribosomal protein L35	7.10033	0.233482	-0.00344108	-0.128347	-0.271396	0.374348	-0.0958095	-0.404685	0.279833	-0.449375	0.347787	0.999855	0.853048	0.343422	0.131697	0.783162	0.0123785	0.0885202	0.00640564
NZ_CP011454.1	2464531	2465787	+	CDS	GEMMAAP_RS10510	WP_158514812.1	serine hydrolase	5.79526	0.232858	0.227839	0.260992	-0.0700009	-0.167969	-0.115498	0.285363	0.00504358	0.280284	0.353116	0.627151	0.595094	0.862205	0.552005	0.723414	0.0677551	0.981795	0.0759512
NZ_CP011454.1	3084038	3084706	-	CDS	GEMMAAP_RS13080	WP_026848835.1	PEP-CTERM sorting domain-containing protein	8.93225	0.232664	0.135654	-0.0405902	-0.232491	-0.140567	-0.191677	0.413948	0.311576	0.0612595	0.370915	0.854147	0.992231	0.434806	0.654364	0.526499	0.0147812	0.072729	0.722102
NZ_CP011454.1	4599551	4600018	+	CDS	GEMMAAP_RS19350	WP_158514938.1	type VI secretion system tube protein Hcp	7.47176	0.232243	0.19755	-0.0880307	-0.133703	-0.226708	-0.012505	0.798611	0.870409	0.73042	0.47507	0.795397	0.964366	0.759648	0.530451	0.993732	0.000335565	0.000203311	0.000829608
NZ_CP011454.1	4137604	4138209	+	CDS	GEMMAAP_RS17440	WP_145979215.1	sigma-70 family RNA polymerase sigma factor	5.74833	0.232217	0.147216	0.00815574	0.0494433	0.0348804	0.149633	0.0752683	0.0248675	0.179914	0.299387	0.778428	0.999712	0.894764	0.933427	0.575093	0.597606	0.904263	0.202413
NZ_CP011454.1	1703591	1704472	-	CDS	GEMMAAP_RS07070	WP_026850401.1	hypothetical protein	4.43775	0.232073	0.145729	0.180879	0.310558	0.0331453	0.204926	0.781171	0.31554	0.893068	0.45208	0.860884	0.87069	0.388892	0.967278	0.55654	0.000123436	0.103259	3.21e-05
NZ_CP011454.1	399340	399657	+	CDS	GEMMAAP_RS01785	WP_158514688.1	DUF1330 domain-containing protein	4.76861	0.23206	0.138409	0.355601	0.323826	0.148296	0.313169	-0.330417	0.00377866	-0.341008	0.437069	0.864082	0.520154	0.344944	0.676055	0.316864	0.0735276	0.987462	0.0755057
NZ_CP011454.1	1321251	1322459	-	CDS	GEMMAAP_RS05545	WP_158514746.1	protein phosphatase 2C domain-containing protein	7.64772	0.231897	0.13628	-0.0185267	-0.0848278	-0.237898	0.102592	0.140886	0.179021	0.370763	0.336574	0.831981	0.999712	0.800261	0.355498	0.753406	0.361137	0.2696	0.0177963
NZ_CP011454.1	675144	676190	-	CDS	GEMMAAP_RS02925	WP_043580562.1	BMP family ABC transporter substrate-binding protein	5.65652	0.231896	-0.0565021	-0.0570682	0.0825719	0.136573	0.0457471	-0.039939	-0.335524	0.0159882	0.361899	0.941504	0.981855	0.824459	0.650608	0.917047	0.810492	0.0466043	0.927831
NZ_CP011454.1	411710	415708	+	CDS	GEMMAAP_RS01855	WP_053333938.1	alkaline phosphatase family protein	6.74642	0.231776	0.154724	0.0184198	0.342458	0.336851	0.334792	-0.0355379	-0.00158686	0.0751118	0.374151	0.814034	0.999712	0.232749	0.200631	0.214576	0.837065	0.993222	0.661924
NZ_CP011454.1	2946940	2947908	-	CDS	GEMMAAP_RS12510	WP_053334067.1	hypothetical protein	7.4631	0.231752	-0.407269	-0.636966	-0.217055	-0.353666	-0.347795	-0.527547	-0.522979	-1.05478	0.509573	0.454702	0.183039	0.614662	0.330427	0.358118	0.017784	0.0232926	3.46e-05
NZ_CP011454.1	3304199	3304438	+	CDS	GEMMAAP_RS14005	WP_026848692.1	DUF4160 domain-containing protein	6.51043	0.231222	-0.522632	-0.627393	-0.125931	-0.527502	-0.710156	0.658953	0.0760979	0.219129	0.552718	0.328548	0.29435	0.814711	0.160788	0.0839183	0.00658605	0.775764	0.350243
NZ_CP011454.1	2226191	2227087	+	CDS	GEMMAAP_RS09400	WP_026850763.1	hypothetical protein	6.2778	0.231037	-0.0111709	-0.0968624	0.10497	-0.127942	-0.0602338	-0.135043	-0.603217	-0.228782	0.249355	0.98967	0.884579	0.698361	0.585505	0.867175	0.291718	8.06e-05	0.0785773
NZ_CP011454.1	4108524	4109393	+	CDS	GEMMAAP_RS17330	WP_082821441.1	SPFH domain-containing protein	5.52258	0.230472	0.0161983	0.00659842	-0.123371	-0.0163118	0.00475466	1.1611	1.1094	1.28744	0.539142	0.991568	0.999712	0.81379	0.990831	0.997347	7.83e-06	2.69e-05	2.02e-06
NZ_CP011454.1	3998199	3998621	-	CDS	GEMMAAP_RS16885	WP_026848269.1	hypothetical protein	3.46243	0.230299	-0.351143	-0.376857	0.399538	0.27976	0.154642	0.290473	0.144664	0.488965	0.597903	0.661356	0.7025	0.389632	0.517453	0.771607	0.222593	0.591746	0.0497957
NZ_CP011454.1	753611	754186	+	CDS	GEMMAAP_RS03260	WP_026849403.1	hypothetical protein	5.73819	0.230294	0.0562484	0.139176	-0.312105	-0.0210048	-0.155781	0.95978	0.70531	0.940622	0.360784	0.941504	0.849967	0.296079	0.972978	0.612731	8.84e-07	0.000106967	1.37e-06
NZ_CP011454.1	44786	45349	-	CDS	GEMMAAP_RS00190	WP_145978918.1	hypothetical protein	6.38422	0.230184	-0.114513	-0.0565577	0.367744	0.203088	0.162161	0.698674	0.707116	0.936138	0.411055	0.891095	0.985589	0.235836	0.509382	0.63659	0.000271767	0.00036831	7.72e-06
NZ_CP011454.1	3481513	3482103	+	CDS	GEMMAAP_RS14720	WP_026848585.1	HupE/UreJ family protein	5.86728	0.230092	-0.130535	-0.262417	-0.143329	-0.0726631	-0.0919449	0.718794	0.22951	0.168977	0.3998	0.864082	0.641613	0.699329	0.848281	0.811618	0.00014426	0.201121	0.328327
NZ_CP011454.1	890815	892794	+	CDS	GEMMAAP_RS03745	WP_026850188.1	Ig-like domain-containing protein	5.66975	0.22876	-0.0567157	0.335609	0.502971	-0.0395618	0.286683	0.706479	0.926561	0.924598	0.381287	0.941504	0.481197	0.092732	0.935138	0.290644	8.61e-05	4.56e-06	2.78e-06
NZ_CP011454.1	2288464	2288853	-	CDS	GEMMAAP_RS09680	WP_026850722.1	30S ribosomal protein S9	8.17124	0.228512	-0.0552302	0.31036	0.163984	0.148819	0.157802	-0.763292	0.229136	-0.810267	0.412165	0.944556	0.51547	0.641564	0.659844	0.654467	0.000132338	0.220352	6.64e-05
NZ_CP011454.1	3669711	3670256	+	CDS	GEMMAAP_RS15530	WP_053333655.1	sigma-70 family RNA polymerase sigma factor	8.69772	0.228415	-0.100688	0.142054	-0.646081	-0.581984	-0.587441	-1.38119	-1.51149	-0.997612	0.846088	0.965706	0.992231	0.537689	0.558985	0.581416	0.018719	0.0140809	0.077088
NZ_CP011454.1	4251360	4254659	+	CDS	GEMMAAP_RS17935	WP_158514918.1	glycosyl hydrolase	5.55739	0.22802	0.215278	-0.0112851	0.217151	0.166259	0.217242	0.0378717	-0.0288934	-0.0713432	0.360654	0.660277	0.999712	0.465127	0.551512	0.430065	0.815615	0.875301	0.664852
NZ_CP011454.1	2185707	2186717	-	CDS	GEMMAAP_RS09200	WP_026850789.1	type I glyceraldehyde-3-phosphate dehydrogenase	7.37201	0.227903	0.24297	-0.0544937	-0.0961828	0.0347295	0.00639409	0.0972978	-0.0770435	-0.0341696	0.316704	0.538762	0.972791	0.758044	0.935255	0.996617	0.50827	0.632728	0.826281
NZ_CP011454.1	2735880	2737529	-	CDS	GEMMAAP_RS11655	WP_082821261.1	family 10 glycosylhydrolase	5.77532	0.227824	-0.079817	0.187918	0.359846	0.317211	0.247974	0.170722	0.162173	0.410507	0.385047	0.92607	0.75892	0.215552	0.229167	0.385722	0.291172	0.349537	0.0146505
NZ_CP011454.1	1383302	1384558	-	CDS	GEMMAAP_RS05745	WP_026849868.1	amidohydrolase family protein	4.82821	0.227621	1.47164	0.525184	0.332457	0.360195	0.319608	0.651109	1.56847	0.362968	0.641904	0.000174918	0.51547	0.545254	0.430558	0.513033	0.015026	2.91e-06	0.182229
NZ_CP011454.1	4405189	4406208	-	CDS	GEMMAAP_RS18580	WP_026850923.1	flippase-like domain-containing protein	5.31925	0.227323	-0.0567101	0.385656	0.209289	0.101925	0.116768	1.85412	1.78276	2.0521	0.642398	0.964414	0.681806	0.727358	0.869204	0.862167	1.63e-07	6.18e-07	3.81e-08
NZ_CP011454.1	349274	349759	+	CDS	GEMMAAP_RS01540	WP_026849151.1	ferritin	5.68118	0.226996	0.181921	0.29149	0.36215	0.366475	0.246908	0.522124	0.30186	0.629038	0.395612	0.75962	0.564129	0.231221	0.165252	0.39957	0.00255024	0.0813984	0.000521353
NZ_CP011454.1	3268341	3269879	-	CDS	GEMMAAP_RS13840	WP_026848715.1	sensor domain-containing diguanylate cyclase	6.76872	0.226881	0.149128	-0.036988	-0.0430739	-0.0452283	-0.0502058	0.477581	0.817448	0.306678	0.31958	0.782377	0.992231	0.911765	0.9287	0.893231	0.00174845	6.01e-06	0.0354867
NZ_CP011454.1	3806305	3806652	-	CDS	GEMMAAP_RS16080	WP_053333796.1	YciI family protein	3.25083	0.225926	0.0136445	0.0860825	-0.350149	0.0136815	0.00642151	-0.0958227	-0.428367	0.1298	0.754265	0.999855	0.992231	0.66065	0.997984	0.997706	0.796435	0.272543	0.740553
NZ_CP011454.1	402047	402445	+	CDS	GEMMAAP_RS01810	WP_026849191.1	SRPBCC family protein	4.96009	0.225755	0.335104	0.347708	0.20603	0.205831	0.180584	1.06466	0.814403	1.21915	0.42476	0.416975	0.510086	0.553749	0.496616	0.586018	6.63e-07	5.41e-05	1.02e-07
NZ_CP011454.1	966127	966882	+	CDS	GEMMAAP_RS04025	WP_053334283.1	ABC transporter ATP-binding protein	6.25657	0.225576	-0.00789695	-0.311963	-0.198272	-0.312571	-0.272386	0.304656	0.23077	0.060578	0.258472	0.994826	0.341106	0.40821	0.121768	0.193723	0.0183103	0.0822619	0.663707
NZ_CP011454.1	1616017	1620135	+	CDS	GEMMAAP_RS06715	WP_082821119.1	HAMP domain-containing protein	7.53277	0.225419	-0.331468	0.0562815	0.156043	-0.154674	-0.170657	0.110592	0.082437	-0.0671275	0.446373	0.500868	0.985589	0.673403	0.665766	0.639751	0.559968	0.692481	0.729411
NZ_CP011454.1	2131921	2132892	-	CDS	GEMMAAP_RS08920	WP_053334560.1	KpsF/GutQ family sugar-phosphate isomerase	7.06518	0.225153	-0.293578	-0.148799	0.0590876	0.116511	-0.10464	-0.571536	-0.150171	-0.617953	0.360296	0.452827	0.806671	0.879436	0.701875	0.753406	0.000741689	0.367324	0.000357643
NZ_CP011454.1	3641874	3643397	+	CDS	GEMMAAP_RS15385	WP_053333665.1	serine hydrolase	8.46005	0.225049	0.0500006	-0.0533139	-0.0116272	-0.0309542	-0.0305778	0.323098	0.131672	0.23103	0.297346	0.941504	0.971133	0.983365	0.940526	0.940671	0.022176	0.372521	0.0940758
NZ_CP011454.1	18169	18513	-	CDS	GEMMAAP_RS00085	WP_026848942.1	helix-turn-helix transcriptional regulator	2.86739	0.224956	-0.0281113	0.353084	0.0165687	-0.295842	-0.287514	1.3476	1.45933	1.36703	0.802096	0.993907	0.886205	0.994121	0.731302	0.756112	0.000981584	0.000727398	0.00132366
NZ_CP011454.1	4426756	4427961	+	CDS	GEMMAAP_RS18645	WP_026850934.1	FAD-binding oxidoreductase	4.71557	0.224767	0.208302	0.307252	0.342851	0.0627878	0.313726	-0.00652646	-0.112918	0.144653	0.405483	0.716624	0.560128	0.262631	0.869439	0.254369	0.970679	0.537361	0.397815
NZ_CP011454.1	1721447	1721761	-	CDS	GEMMAAP_RS07140	WP_026850414.1	hypothetical protein	3.73187	0.224566	0.343467	-0.149609	-0.0913418	-0.186748	-0.353361	0.0978027	-0.458336	0.0427144	0.536177	0.564584	0.919572	0.871223	0.647386	0.347499	0.647254	0.0435505	0.854002
NZ_CP011454.1	1187849	1188862	+	CDS	GEMMAAP_RS04905	WP_026850006.1	S-methyl-5-thioribose-1-phosphate isomerase	5.08675	0.224197	0.0685727	0.257728	0.307434	0.296603	0.385869	0.919198	1.14596	1.29701	0.337621	0.928979	0.564863	0.240952	0.197501	0.103571	3.87e-07	2.79e-08	1.84e-09
NZ_CP011454.1	1921649	1922452	-	CDS	GEMMAAP_RS07935	WP_075071463.1	nucleoside triphosphate pyrophosphohydrolase	5.09158	0.223895	0.0175492	-0.0972093	0.102549	-0.0661455	0.0618833	0.998859	0.600376	1.21785	0.433738	0.986041	0.947486	0.800819	0.869204	0.890828	2.21e-06	0.00166961	1.28e-07
NZ_CP011454.1	3346708	3347148	-	CDS	GEMMAAP_RS14205	WP_026848662.1	universal stress protein	4.92908	0.223888	-0.0558143	0.288112	0.085272	0.0434061	-0.047007	-0.290712	-0.55749	-0.274543	0.33515	0.941504	0.510086	0.795596	0.910455	0.902539	0.0456441	0.000721734	0.0661226
NZ_CP011454.1	4454425	4455909	+	CDS	GEMMAAP_RS18760	WP_158514930.1	Xaa-Pro peptidase family protein	4.03788	0.223599	0.341775	0.423207	0.282784	0.173991	0.235908	0.39076	0.339108	0.509935	0.517145	0.538762	0.508241	0.480194	0.654364	0.526499	0.051267	0.107982	0.0157577
NZ_CP011454.1	4318464	4318892	+	CDS	GEMMAAP_RS18190	WP_053334631.1	SET domain-containing protein-lysine N-methyltransferase	4.5645	0.223591	0.153432	-0.12668	-0.306791	-0.197853	-0.247179	0.476686	0.236165	0.658253	0.537335	0.871495	0.938761	0.482646	0.630771	0.539193	0.0256719	0.296523	0.00345697
NZ_CP011454.1	121193	122104	+	CDS	GEMMAAP_RS00515	WP_043580079.1	homocysteine S-methyltransferase	4.41356	0.223508	0.28869	0.254861	0.570708	0.176781	0.491387	-0.210878	-0.648454	-0.149774	0.522729	0.659798	0.747756	0.129353	0.655551	0.142615	0.309768	0.00512573	0.495448
NZ_CP011454.1	1173716	1174474	-	CDS	GEMMAAP_RS04840	WP_026850017.1	ParA family protein	8.2695	0.223505	-0.0648706	-0.0622155	-0.0570215	-0.243899	-0.182314	-0.177926	-0.520598	-0.271424	0.427737	0.941504	0.980694	0.899177	0.420288	0.596986	0.319677	0.00678995	0.126954
NZ_CP011454.1	4578938	4580374	-	CDS	GEMMAAP_RS19285	WP_026851029.1	M48 family metalloprotease	5.21974	0.223433	0.0294073	0.313217	0.157034	-0.0078334	-0.0454322	0.739715	0.700751	0.548412	0.628721	0.983871	0.747756	0.790027	0.999236	0.953224	0.00540454	0.0107208	0.0375351
NZ_CP011454.1	4229337	4229786	+	CDS	GEMMAAP_RS17830	WP_026848136.1	hypothetical protein	4.27885	0.222985	-0.0404439	0.4168	0.137173	-0.220463	0.0378771	0.385058	-0.132869	0.499324	0.623655	0.970361	0.630888	0.821559	0.654364	0.961459	0.122746	0.640873	0.0522042
NZ_CP011454.1	3248880	3249473	-	CDS	GEMMAAP_RS13745	WP_053333745.1	hypothetical protein	4.57979	0.222947	0.202133	0.28817	-0.222689	0.162503	-0.182198	0.472377	-0.0909943	0.309489	0.385047	0.704858	0.560128	0.490009	0.567005	0.535795	0.00357734	0.603526	0.0534975
NZ_CP011454.1	1859510	1860871	+	CDS	GEMMAAP_RS07695	WP_026850496.1	tRNA lysidine(34) synthetase TilS	9.12643	0.222567	-0.682018	-0.368195	0.104944	-0.417521	-0.308385	-0.60458	-0.549489	-0.702342	0.433507	0.0181379	0.417442	0.779225	0.144088	0.314838	0.0016602	0.00483956	0.000379502
NZ_CP011454.1	3888081	3889079	+	CDS	GEMMAAP_RS16430	WP_145979193.1	transporter	6.08688	0.222515	0.105443	0.0962559	-0.0825067	-0.121962	-0.0327529	0.469462	0.280603	0.294238	0.376056	0.887013	0.923563	0.823875	0.69074	0.944909	0.0039818	0.0869624	0.0635459
NZ_CP011454.1	4230868	4231140	-	CDS	GEMMAAP_RS17845	WP_026848133.1	hypothetical protein	3.55688	0.221299	0.442234	0.0765174	0.331356	0.0877182	0.565883	0.688203	0.471721	0.695777	0.466747	0.257718	0.980694	0.333738	0.857496	0.0639303	0.000310443	0.0125654	0.000443168
NZ_CP011454.1	419298	419819	+	CDS	GEMMAAP_RS01870	WP_158514689.1	hypothetical protein	4.67354	0.221263	0.142296	0.0819942	0.331302	0.0549575	0.256739	0.564547	0.518466	0.544307	0.392412	0.831166	0.999712	0.252277	0.883749	0.351498	0.000764341	0.00250489	0.00141868
NZ_CP011454.1	4699708	4700400	-	CDS	GEMMAAP_RS19810	WP_082821532.1	YdcF family protein	7.42961	0.221061	0.0355386	0.239658	0.150908	0.138566	0.301513	1.07798	0.625339	1.14735	0.146461	0.941504	0.320281	0.408211	0.415124	0.0798992	1.5e-10	1.56e-06	5.53e-11
NZ_CP011454.1	4133130	4134317	+	CDS	GEMMAAP_RS17415	WP_145979214.1	sulfite dehydrogenase	5.20447	0.220722	0.251178	0.0752774	-0.165372	-0.0152386	-0.0686184	-0.0376146	-0.167302	-0.0681615	0.40131	0.600456	0.966226	0.639654	0.985467	0.867175	0.827025	0.338975	0.694969
NZ_CP011454.1	3927449	3928528	+	CDS	GEMMAAP_RS16595	WP_158514905.1	GGDEF domain-containing protein	7.19444	0.220204	0.173609	-0.147878	-0.125721	0.193316	-0.142743	0.386276	0.0434046	0.14696	0.477446	0.829247	0.874146	0.764458	0.58245	0.721885	0.0475846	0.849924	0.451297
NZ_CP011454.1	3907294	3907713	-	CDS	GEMMAAP_RS16510	WP_026848323.1	Lrp/AsnC family transcriptional regulator	2.03124	0.220171	0.388948	0.553999	0.0970689	-0.22771	-0.478466	0.698179	0.295595	0.566683	0.775979	0.73864	0.648602	0.918873	0.741328	0.452101	0.0259435	0.396592	0.0895135
NZ_CP011454.1	3997381	3998202	-	CDS	GEMMAAP_RS16880	WP_053333588.1	HTTM domain-containing protein	3.97183	0.219879	0.0659957	-0.236122	0.428061	0.26503	0.297676	0.431689	0.165059	0.513175	0.543636	0.945155	0.82114	0.270911	0.466671	0.423609	0.0379566	0.464221	0.0181063
NZ_CP011454.1	3426166	3427167	-	CDS	GEMMAAP_RS14520	WP_026848614.1	hypothetical protein	6.51036	0.219842	0.0848637	0.183822	0.425414	0.329333	0.404054	0.95053	0.657193	1.03491	0.347787	0.903163	0.715766	0.107971	0.158053	0.0987581	4.21e-07	0.000116178	1.17e-07
NZ_CP011454.1	2215782	2216195	-	CDS	GEMMAAP_RS09350	WP_026850769.1	cobalamin B12-binding domain-containing protein	6.29678	0.21953	0.0727025	-0.21239	-0.0758712	-0.0810518	0.0314593	0.601384	-0.0748131	0.512641	0.311516	0.91699	0.622653	0.809628	0.772149	0.938205	8.55e-05	0.620832	0.000551576
NZ_CP011454.1	3969533	3970033	-	CDS	GEMMAAP_RS16750	WP_043579357.1	YeeE/YedE family protein	5.85593	0.219308	-0.0657695	-0.0453649	-0.0248739	0.220466	0.0902808	0.978781	0.479046	0.937524	0.392811	0.938883	0.992231	0.966331	0.415582	0.798459	9.01e-07	0.00516397	1.89e-06
NZ_CP011454.1	45428	46435	-	CDS	GEMMAAP_RS00195	WP_053333857.1	alpha/beta fold hydrolase	5.84619	0.219247	0.304121	0.387613	0.316337	0.493697	0.540108	0.365184	0.00241622	0.650848	0.265672	0.263999	0.183039	0.163266	0.00722622	0.0189746	0.00451913	0.988013	1.07e-05
NZ_CP011454.1	3304410	3304685	+	CDS	GEMMAAP_RS14010	WP_026848691.1	DUF2442 domain-containing protein	6.59541	0.219126	-0.50716	-0.655923	-0.14236	-0.537431	-0.71033	0.627048	4.89e-05	0.0926274	0.521628	0.27861	0.181766	0.75663	0.101761	0.0509237	0.00396726	0.999791	0.670589
NZ_CP011454.1	806293	807972	-	CDS	GEMMAAP_RS03440	WP_026850228.1	amidohydrolase	4.85656	0.219064	0.47189	0.0505127	0.224032	0.165147	0.39304	0.857517	0.540023	0.843879	0.417575	0.12431	0.992231	0.495709	0.585384	0.142389	8.71e-06	0.00252438	1.44e-05
NZ_CP011454.1	1312020	1313849	-	CDS	GEMMAAP_RS05510	WP_053334228.1	ABC transporter ATP-binding protein/permease	5.09249	0.218531	0.00179273	0.026373	-0.419478	-0.152437	-0.157186	0.432843	0.0143594	0.241815	0.463783	0.999855	0.999712	0.216347	0.666549	0.668791	0.0183481	0.950315	0.187824
NZ_CP011454.1	4350235	4350915	+	CDS	GEMMAAP_RS18335	WP_053334570.1	ankyrin repeat domain-containing protein	4.82001	0.218298	0.523178	0.321031	0.163538	-0.236328	0.0738005	1.37132	0.582574	1.39081	0.536177	0.224237	0.649956	0.720989	0.530576	0.889902	2.14e-07	0.00776604	2.03e-07
NZ_CP011454.1	4186595	4187131	-	CDS	GEMMAAP_RS17660	WP_053333547.1	DinB family protein	4.11581	0.218228	-0.0307095	-0.11536	-0.00714401	-0.113464	-0.0626133	0.953294	0.651843	1.04929	0.505945	0.986602	0.954135	0.994121	0.77721	0.903544	1.4e-05	0.00176268	4.97e-06
NZ_CP011454.1	3145120	3151671	-	CDS	GEMMAAP_RS13325	WP_026848799.1	cell surface protein SprA	8.57398	0.218125	-0.151126	0.0309759	-0.230216	-0.264856	-0.188307	-0.171549	-0.0643686	-0.0728053	0.306308	0.755032	0.992231	0.333249	0.230114	0.437911	0.208809	0.673732	0.602847
NZ_CP011454.1	1153713	1154324	-	CDS	GEMMAAP_RS04755	WP_026850033.1	thymidine kinase	5.04153	0.217971	-0.15972	0.203683	-0.067949	0.225924	-0.0773527	-0.909475	-0.288612	-1.48992	0.48417	0.848471	0.794423	0.894404	0.496616	0.871594	4.31e-05	0.150768	1.13e-07
NZ_CP011454.1	3904882	3905928	+	CDS	GEMMAAP_RS16500	WP_158514903.1	dienelactone hydrolase family protein	5.89555	0.217852	0.115846	0.0531001	0.302633	0.30598	0.123104	0.24247	0.416952	0.154686	0.472717	0.89517	0.992231	0.387386	0.327589	0.756112	0.188224	0.0325409	0.414278
NZ_CP011454.1	3098556	3099641	+	CDS	GEMMAAP_RS13135	WP_026848825.1	PAS domain-containing protein	4.62524	0.217595	0.0627051	-0.0772698	-0.341858	-0.0325177	-0.153479	0.528548	0.0813046	0.406649	0.397324	0.941504	0.985589	0.259203	0.997984	0.625829	0.00143233	0.644531	0.0132266
NZ_CP011454.1	1559532	1560443	-	CDS	GEMMAAP_RS06475	WP_043581450.1	chlorophyll synthase ChlG	7.4395	0.216799	-0.0234938	0.145651	0.460687	0.152351	0.272017	0.408216	0.651323	0.453731	0.336269	0.968958	0.777628	0.0688979	0.552005	0.250705	0.00596042	0.000105211	0.00263824
NZ_CP011454.1	1625671	1626111	+	CDS	GEMMAAP_RS06740	WP_026850351.1	vitamin K epoxide reductase family protein	5.51503	0.216728	-0.280494	-0.0635025	-0.163478	-0.261526	-0.25295	0.788269	0.488934	0.669108	0.461303	0.600456	0.98462	0.673995	0.394428	0.437911	8.72e-05	0.0105431	0.00063326
NZ_CP011454.1	1626800	1627603	+	CDS	GEMMAAP_RS06750	WP_158514760.1	ubiquinone/menaquinone biosynthesis methyltransferase	4.37696	0.216595	0.207445	-0.0663241	0.0290751	-0.0717757	0.0689847	0.415579	0.341855	0.444798	0.489409	0.757173	0.985589	0.966714	0.868318	0.888193	0.0260299	0.0790697	0.0210802
NZ_CP011454.1	2319203	2319424	-	CDS	GEMMAAP_RS09815	WP_026850705.1	exodeoxyribonuclease VII small subunit	5.90067	0.21598	0.016604	-0.0166796	0.334127	0.250569	0.090925	-0.604019	-0.457701	-0.355103	0.389769	0.985307	0.999712	0.233255	0.341407	0.793044	0.000430126	0.00690978	0.0282018
NZ_CP011454.1	1931789	1932868	+	CDS	GEMMAAP_RS07975	WP_026850538.1	class 1 fructose-bisphosphatase	7.60469	0.215584	0.147246	0.139541	-0.0487756	-0.188224	0.0096202	0.179206	-0.582037	-0.139774	0.250539	0.733406	0.727511	0.869505	0.355498	0.987018	0.140605	5.89e-05	0.248051
NZ_CP011454.1	3813994	3814473	-	CDS	GEMMAAP_RS16120	WP_179947316.1	RidA family protein	4.90426	0.214982	0.329115	0.205051	0.254831	0.0529933	0.134097	0.762674	0.255771	0.76867	0.433738	0.415627	0.747973	0.427012	0.901201	0.691193	5.05e-05	0.143317	5.85e-05
NZ_CP011454.1	1392963	1393289	+	CDS	GEMMAAP_RS05785	WP_026849861.1	hypothetical protein	4.64326	0.214922	0.361663	0.245604	0.549225	0.431625	0.544061	0.541518	0.64434	0.340253	0.563891	0.538762	0.777593	0.163266	0.214275	0.120217	0.012669	0.00515216	0.120405
NZ_CP011454.1	303444	304178	-	CDS	GEMMAAP_RS01355	WP_053333917.1	SDR family oxidoreductase	4.06259	0.214855	0.340832	0.43184	-0.286668	-0.0503319	-0.126769	1.33639	1.12989	1.42761	0.511094	0.500868	0.466504	0.477113	0.981335	0.77625	7.35e-08	2.14e-06	3.57e-08
NZ_CP011454.1	4302987	4305344	+	CDS	GEMMAAP_RS18135	WP_082821471.1	S8 family serine peptidase	4.66073	0.214833	-0.0698611	0.0797686	0.0059555	0.0872095	0.0621936	0.677656	0.580021	0.815111	0.400459	0.931739	0.992231	0.994121	0.786775	0.875011	9.31e-05	0.000827564	1.13e-05
NZ_CP011454.1	2560361	2560675	+	CDS	GEMMAAP_RS20560	WP_158514820.1	FMN-binding protein	4.2809	0.214045	0.630139	0.130463	-0.0977701	-0.177522	-0.0320629	1.49663	1.12105	1.72152	0.664239	0.285691	0.966864	0.895878	0.742229	0.974682	2.06e-06	0.000180065	3.06e-07
NZ_CP011454.1	4172015	4172857	-	CDS	GEMMAAP_RS17585	WP_026848172.1	NAD(P)H-binding protein	2.25796	0.213955	0.0522172	0.21001	0.279056	-0.133661	0.0769302	0.636751	0.739194	0.458307	0.840815	0.983871	0.980694	0.797968	0.918422	0.956384	0.139697	0.108498	0.328078
NZ_CP011454.1	31698	32051	+	CDS	GEMMAAP_RS00130	WP_053333852.1	HPF/RaiA family ribosome-associated protein	7.65808	0.213877	-0.592226	-0.516797	-0.82417	-0.748142	-0.992998	0.431074	-0.285241	-0.721324	0.72008	0.494679	0.586472	0.163266	0.15754	0.0847679	0.18781	0.413734	0.0316446
NZ_CP011454.1	2234346	2235032	-	CDS	GEMMAAP_RS09440	WP_026850755.1	phosphoribosylanthranilate isomerase	5.68222	0.21379	0.149851	0.214716	0.00243414	0.0990319	-0.011539	0.368407	0.00870717	0.33643	0.358081	0.782377	0.649956	0.999455	0.730624	0.987018	0.0122847	0.962376	0.0232982
NZ_CP011454.1	703738	706077	+	CDS	GEMMAAP_RS03040	WP_053334000.1	PBP1A family penicillin-binding protein	8.5598	0.213717	-0.476858	-0.351975	-0.168525	-0.378135	-0.583256	0.545332	0.738992	0.449716	0.659075	0.522993	0.667755	0.769367	0.418186	0.196049	0.0504361	0.0122749	0.101122
NZ_CP011454.1	1254561	1255367	+	CDS	GEMMAAP_RS05240	WP_026849954.1	30S ribosomal protein S5	8.4307	0.213356	-0.177569	-0.175208	0.0516249	0.468468	-0.0499721	-0.782807	-0.230977	-1.07612	0.459962	0.794963	0.794028	0.91155	0.098254	0.921021	0.00013077	0.228403	2.03e-06
NZ_CP011454.1	1659375	1660064	-	CDS	GEMMAAP_RS06885	WP_026850374.1	Crp/Fnr family transcriptional regulator	4.42619	0.213302	0.105979	0.120113	-0.235478	-0.0359595	-0.109452	-0.240892	-0.967223	-0.535849	0.4509	0.895311	0.992231	0.495947	0.945536	0.770936	0.159193	1.15e-05	0.00452578
NZ_CP011454.1	3196659	3196892	-	CDS	GEMMAAP_RS13525	WP_026848766.1	hypothetical protein	8.31422	0.213111	0.0981022	0.102711	0.58871	0.222158	0.342569	0.928609	0.918434	1.03587	0.431278	0.903755	0.916818	0.0586049	0.447585	0.223014	6.93e-06	1.42e-05	1.35e-06
NZ_CP011454.1	4288404	4291928	+	CDS	GEMMAAP_RS20860	WP_053333527.1	DUF1080 domain-containing protein	3.69457	0.2131	0.17997	0.0814077	0.229921	0.257131	0.115225	0.48878	0.380224	0.541479	0.630494	0.829225	0.980694	0.577182	0.448664	0.804147	0.0130995	0.0638934	0.00901289
NZ_CP011454.1	4298991	4299419	+	CDS	GEMMAAP_RS18115	WP_026848090.1	hypothetical protein	6.7515	0.212967	-2.53559	-0.831167	-0.742356	-1.89614	-1.57154	2.55252	-0.23838	1.22713	0.893691	0.0744401	0.759951	0.623918	0.11367	0.196325	0.00156016	0.766518	0.0847149
NZ_CP011454.1	2686757	2688037	+	CDS	GEMMAAP_RS11440	WP_053334123.1	HD domain-containing protein	6.46275	0.212739	0.13624	0.236306	-0.125869	0.000831237	-0.0714509	0.645397	0.128041	0.817473	0.358281	0.816257	0.596936	0.676914	0.999236	0.82962	8.24e-05	0.409635	3.78e-06
NZ_CP011454.1	2978402	2979565	-	CDS	GEMMAAP_RS12630	WP_026849488.1	VOC family protein	4.73364	0.212658	-0.0956136	-0.603482	-0.25907	-0.422089	-0.549886	0.387656	-0.282888	0.163904	0.549254	0.931656	0.300722	0.549901	0.217221	0.114955	0.0606658	0.201251	0.442204
NZ_CP011454.1	4295578	4297062	-	CDS	GEMMAAP_RS18100	WP_158514919.1	carboxypeptidase regulatory-like domain-containing protein	4.99801	0.212009	-0.0277672	0.224575	0.0431136	0.201589	0.155424	1.07056	0.694462	1.0101	0.525136	0.972992	0.777593	0.94583	0.572749	0.696004	4.6e-06	0.00130425	1.31e-05
NZ_CP011454.1	4443585	4444532	-	CDS	GEMMAAP_RS18710	WP_026850945.1	phenylalanine 4-monooxygenase	6.41971	0.211943	0.202745	0.467935	-0.0221808	0.152627	0.203012	-1.06785	-1.44076	-1.31458	0.586084	0.833404	0.467281	0.98099	0.736871	0.654546	6.73e-05	3.15e-06	7.07e-06
NZ_CP011454.1	1314882	1316699	-	CDS	GEMMAAP_RS05520	WP_043581044.1	gamma-glutamyltransferase	5.5445	0.211712	0.0886607	0.105899	0.236232	0.066947	0.0786619	0.215878	0.0964818	0.14309	0.312635	0.884722	0.873857	0.327833	0.808317	0.786643	0.0962093	0.492614	0.27787
NZ_CP011454.1	3954532	3956031	+	CDS	GEMMAAP_RS16690	WP_082821423.1	amidohydrolase	5.73323	0.211471	0.101145	-0.0293374	0.0935585	0.187041	0.141564	1.28865	1.23259	1.29429	0.301191	0.860884	0.992231	0.740456	0.383701	0.547079	2.75e-10	1.64e-09	2.88e-10
NZ_CP011454.1	2910993	2912174	+	CDS	GEMMAAP_RS12340	WP_026849535.1	aminotransferase class I/II-fold pyridoxal phosphate-dependent enzyme	5.55434	0.211439	-0.0512319	0.386827	-0.0231747	0.0788051	-0.084273	1.05873	0.994661	1.07921	0.328302	0.941504	0.250361	0.959961	0.773101	0.77394	1.57e-08	9.19e-08	1.33e-08
NZ_CP011454.1	66642	67148	+	CDS	GEMMAAP_RS00285	WP_026848972.1	hypothetical protein	5.51387	0.211231	-0.409221	0.249422	0.0262372	-0.327883	-0.401632	-0.937653	-0.976784	-0.787009	0.61547	0.538762	0.798027	0.978117	0.426246	0.338704	0.000449792	0.000500092	0.00286188
NZ_CP011454.1	3972629	3974458	+	CDS	GEMMAAP_RS16770	WP_158514908.1	amidohydrolase family protein	5.77908	0.211023	-0.308614	0.0050555	0.386619	0.100803	0.132444	-0.0563645	-0.514276	-0.81611	0.35053	0.342415	0.999712	0.129353	0.713296	0.631245	0.69686	0.00115674	4.36e-06
NZ_CP011454.1	4495005	4495577	-	CDS	GEMMAAP_RS18935	WP_043581775.1	pentapeptide repeat-containing protein	4.42773	0.210874	0.0241056	0.186758	-0.0115922	-0.275041	0.114911	2.14816	1.46979	2.4134	0.64035	0.986214	0.903874	0.993088	0.541191	0.841953	1.45e-09	1.23e-06	2.5e-10
NZ_CP011454.1	3119529	3119789	+	CDS	GEMMAAP_RS13195	WP_043579515.1	CsbD family protein	3.89	0.209789	-0.103545	-0.124306	0.274619	-0.229558	-0.226294	-0.996286	-0.84268	-1.51554	0.659075	0.941504	0.966226	0.614736	0.645102	0.667305	0.000572288	0.00407923	1.53e-05
NZ_CP011454.1	1540564	1541094	+	CDS	GEMMAAP_RS06385	WP_158514753.1	nucleotide exchange factor GrpE	6.95594	0.209516	-0.187276	-0.294346	-0.468566	-0.383323	-0.450817	0.697978	0.596592	0.741692	0.585315	0.853751	0.693232	0.254071	0.317256	0.227912	0.00344855	0.0136106	0.00214797
NZ_CP011454.1	3638047	3638859	+	CDS	GEMMAAP_RS15365	WP_026848493.1	matrixin family metalloprotease	5.29894	0.209468	0.138823	-0.379876	0.151686	-0.107429	-0.28967	-0.474442	-0.714286	-0.490612	0.711513	0.931656	0.742304	0.842946	0.880433	0.63239	0.124297	0.0311011	0.121324
NZ_CP011454.1	294429	296036	-	CDS	GEMMAAP_RS01310	WP_053333915.1	PDZ domain-containing protein	8.80931	0.208833	-0.440015	-0.246368	-0.217365	-0.350243	-0.469561	-0.19909	-0.498293	-0.82381	0.487832	0.295323	0.656783	0.534923	0.252844	0.126086	0.289086	0.0127199	0.000103877
NZ_CP011454.1	4524371	4524856	-	CDS	GEMMAAP_RS19040	WP_026850992.1	peptide-methionine (R)-S-oxide reductase MsrB	6.79899	0.208219	-0.316033	-0.341324	-0.0924812	-0.295275	-0.183347	-0.324814	-0.456	-0.609452	0.47507	0.515022	0.510086	0.824138	0.330554	0.604395	0.0744855	0.0181463	0.00179333
NZ_CP011454.1	4382302	4383615	-	CDS	GEMMAAP_RS18475	WP_026850910.1	amidohydrolase	5.31551	0.208069	0.157683	0.294152	0.825999	0.814643	0.642957	0.838429	0.930219	0.733809	0.482437	0.83508	0.614156	0.0112424	0.00144076	0.0403703	3.46e-05	1.63e-05	0.000222096
NZ_CP011454.1	1494491	1495393	+	CDS	GEMMAAP_RS06150	WP_145979025.1	hypothetical protein	6.69877	0.20792	-0.211463	-0.143526	-0.00878337	-0.261609	-0.309549	-0.260334	-0.235173	-0.358047	0.401572	0.680203	0.833372	0.991142	0.322302	0.230125	0.0987312	0.15412	0.0261632
NZ_CP011454.1	1688113	1689723	+	CDS	GEMMAAP_RS07010	WP_053334359.1	M20/M25/M40 family metallo-hydrolase	5.63618	0.20732	-0.0345567	0.080738	0.105169	0.156586	0.090617	0.661517	0.485836	0.543232	0.389883	0.959814	0.943374	0.749685	0.558985	0.784443	7.45e-05	0.00268596	0.000778879
NZ_CP011454.1	766526	767569	+	CDS	GEMMAAP_RS03290	WP_026849407.1	N(4)-(beta-N-acetylglucosaminyl)-L-asparaginase	5.80424	0.207318	0.118486	0.0994207	-0.0527927	0.00273915	0.0599088	-0.164735	-0.580825	-0.209422	0.291441	0.809738	0.873857	0.86779	0.999236	0.832467	0.182111	8.6e-05	0.0967978
NZ_CP011454.1	142180	143358	+	CDS	GEMMAAP_RS00625	WP_053333876.1	serine hydrolase	5.57771	0.207307	-0.000414574	-0.0530384	-0.0258931	0.0356265	0.260415	1.22481	1.2648	1.4782	0.357485	0.999855	0.999712	0.958981	0.991266	0.260652	2.81e-09	4.36e-09	1.5e-10
NZ_CP011454.1	2386545	2386799	-	CDS	GEMMAAP_RS10140	WP_053334470.1	twin-arginine translocase TatA/TatE family subunit	7.8826	0.207146	0.162638	0.0421346	0.0817037	0.137756	0.130304	-0.318392	-0.211655	-0.693129	0.541014	0.860884	0.992231	0.870893	0.736863	0.770936	0.124875	0.336029	0.00173777
NZ_CP011454.1	3319932	3321344	+	CDS	GEMMAAP_RS14095	WP_026848681.1	magnesium transporter	6.44722	0.206793	0.15534	-0.00828054	-0.0299258	-0.0055786	0.0409513	0.607521	0.028621	0.867551	0.532113	0.860884	0.999712	0.966331	0.999236	0.946044	0.00350744	0.904263	0.000111635
NZ_CP011454.1	4239048	4240505	-	CDS	GEMMAAP_RS17880	WP_082821457.1	sulfatase-like hydrolase/transferase	5.15164	0.206416	-0.0667148	-0.26758	0.289714	0.0706341	0.189371	0.832737	0.456138	0.747694	0.431278	0.938883	0.738923	0.333249	0.841714	0.517985	9.47e-06	0.00761831	4.88e-05
NZ_CP011454.1	27138	28778	+	CDS	GEMMAAP_RS00115	WP_026848945.1	TldD/PmbA family protein	7.92577	0.206319	-0.468474	-0.773019	-0.734415	-0.882327	-1.06547	0.445291	0.471994	-0.114586	0.711022	0.604612	0.291671	0.178724	0.070267	0.0502175	0.147925	0.142523	0.719389
NZ_CP011454.1	4644910	4645947	-	CDS	GEMMAAP_RS19535	WP_043580052.1	D-alanine--D-alanine ligase	7.4147	0.205878	-0.0825844	-0.134343	0.0570407	-0.0474986	-0.0600632	0.819447	0.501093	0.925096	0.248467	0.871495	0.731402	0.824629	0.852931	0.815063	1.17e-07	0.000171837	1.53e-08
NZ_CP011454.1	1633459	1635528	+	CDS	GEMMAAP_RS06780	WP_026850357.1	S9 family peptidase	6.50426	0.205718	0.0942684	-0.024601	0.216316	0.079908	0.16563	0.554434	0.462752	0.550831	0.216014	0.835828	0.992231	0.262186	0.702736	0.37735	1.19e-05	0.00018645	1.37e-05
NZ_CP011454.1	4162530	4163039	+	CDS	GEMMAAP_RS20680	WP_026848183.1	CIA30 family protein	4.46692	0.205542	-0.0216693	0.137282	0.320361	0.0130611	0.16291	0.447437	0.281796	0.229827	0.539409	0.999855	0.922233	0.387526	0.991437	0.677148	0.0225236	0.170226	0.250585
NZ_CP011454.1	1219888	1220310	+	CDS	GEMMAAP_RS05065	WP_026849985.1	50S ribosomal protein L11	8.49513	0.2053	-0.145337	0.0604557	-0.0741635	0.278309	0.00769956	-1.29078	-0.375235	-1.29346	0.350967	0.782377	0.962711	0.805351	0.217016	0.9942	2.37e-09	0.0121009	2.02e-09
NZ_CP011454.1	4612806	4613402	+	CDS	GEMMAAP_RS19405	WP_026848855.1	hypothetical protein	4.88999	0.205213	0.178873	0.238645	-0.0701575	-0.364047	0.242722	0.162407	0.0359401	0.0166968	0.537335	0.829225	0.747756	0.895878	0.270353	0.497532	0.409553	0.877503	0.940647
NZ_CP011454.1	2444444	2444821	-	CDS	GEMMAAP_RS10375	WP_026849820.1	30S ribosomal protein S13	8.06844	0.205044	-0.140569	-0.0583084	0.269248	0.49097	0.229579	-1.0335	0.068827	-0.933321	0.4404	0.848259	0.980694	0.363757	0.0604741	0.443883	1.25e-06	0.716503	5.25e-06
NZ_CP011454.1	2295997	2296542	+	CDS	GEMMAAP_RS09720	WP_026850717.1	hypothetical protein	6.69369	0.204943	0.0255699	-0.246579	-0.387705	-0.226736	-0.237237	0.243907	-0.237862	-0.00567035	0.456236	0.971468	0.647749	0.207364	0.438525	0.437911	0.153101	0.186943	0.974364
NZ_CP011454.1	3213730	3214605	+	CDS	GEMMAAP_RS13595	WP_026848755.1	hypothetical protein	3.15156	0.204883	-0.0217185	-0.389569	-0.342319	-0.11657	-0.127942	0.327622	-0.287832	0.0626161	0.591122	0.986022	0.630888	0.439005	0.797144	0.792208	0.115937	0.210931	0.953137
NZ_CP011454.1	4136687	4137379	-	CDS	GEMMAAP_RS20850	WP_202969163.1	PEP-CTERM sorting domain-containing protein	6.29698	0.204846	-0.329367	-0.553114	-0.260409	-0.614723	-0.553003	-0.467619	-0.773076	-0.971475	0.669029	0.731305	0.48366	0.643538	0.157814	0.217683	0.0847444	0.00865414	0.00129654
NZ_CP011454.1	1205099	1205767	+	CDS	GEMMAAP_RS04970	WP_026849996.1	L-serine ammonia-lyase%2C iron-sulfur-dependent subunit beta	5.977	0.204787	0.11959	0.179912	0.169536	0.224207	0.164283	0.352117	0.384464	0.206283	0.278144	0.790303	0.638804	0.463241	0.251429	0.442276	0.00445981	0.00306583	0.0874218
NZ_CP011454.1	1986237	1986668	+	CDS	GEMMAAP_RS08230	WP_026850578.1	NIPSNAP family protein	3.60355	0.204713	-0.0938503	-0.253086	-0.563892	0.136083	-0.089781	0.551235	0.580883	0.775693	0.664239	0.941504	0.853048	0.265561	0.797144	0.893916	0.027331	0.0270581	0.00354498
NZ_CP011454.1	2667026	2668042	+	CDS	GEMMAAP_RS11365	WP_043580897.1	ROK family protein	6.6615	0.203836	0.088231	0.165716	0.0607036	0.204718	0.044147	0.63576	0.0178056	0.63633	0.346424	0.891095	0.821545	0.852456	0.369937	0.902539	4.39e-05	0.913692	4.47e-05
NZ_CP011454.1	1914693	1915622	+	CDS	GEMMAAP_RS07915	WP_026850528.1	signal recognition particle-docking protein FtsY	5.83868	0.203578	0.0471366	0.126227	0.177124	0.153641	0.0497077	-0.0999209	-0.0801713	-0.203703	0.328781	0.941504	0.873857	0.482795	0.50129	0.881298	0.447101	0.576797	0.124039
NZ_CP011454.1	1244691	1245893	+	CDS	GEMMAAP_RS05145	WP_026849972.1	elongation factor Tu	10.0009	0.203513	-0.0568776	-0.134967	0.108891	0.40966	0.156277	-0.584044	-0.0343479	-1.05862	0.480856	0.944556	0.864093	0.768302	0.155238	0.663088	0.00232364	0.871956	2.25e-06
NZ_CP011454.1	3119854	3120225	+	CDS	GEMMAAP_RS13200	WP_053333777.1	BON domain-containing protein	1.44471	0.203339	0.0813213	-0.042036	0.223004	-0.0136246	-0.113858	-0.165762	-0.660561	-0.550168	0.831803	0.965706	0.999712	0.829771	0.999236	0.927767	0.698495	0.165236	0.254885
NZ_CP011454.1	3706625	3708400	-	CDS	GEMMAAP_RS15700	WP_053333647.1	serine/threonine protein kinase	6.46585	0.202916	-0.0651974	0.103605	-0.0485077	-0.243667	-0.278996	0.00503856	0.0383075	0.0375117	0.439319	0.941504	0.916818	0.913211	0.378494	0.322129	0.976806	0.842297	0.83166
NZ_CP011454.1	1796913	1797503	-	CDS	GEMMAAP_RS07480	WP_053334385.1	DUF2911 domain-containing protein	6.55885	0.202584	-0.237935	-0.43274	-0.456276	-0.664027	-0.658375	-0.273889	-0.660706	-0.649476	0.505524	0.705328	0.366823	0.17941	0.0182348	0.0487233	0.14198	0.00148936	0.00134952
NZ_CP011454.1	551560	553038	-	CDS	GEMMAAP_RS02445	WP_026849283.1	sigma-54 dependent transcriptional regulator	7.50409	0.202196	0.151866	0.00241678	0.121781	-0.0326665	0.0793861	0.371374	0.333687	0.587422	0.270101	0.704858	0.999712	0.601356	0.920462	0.753054	0.00284163	0.00835521	2.03e-05
NZ_CP011454.1	3540293	3540907	-	CDS	GEMMAAP_RS14955	WP_053333684.1	sigma-70 family RNA polymerase sigma factor	5.87563	0.202171	-0.166687	-0.315174	-0.616212	-0.366705	-0.52951	1.10671	1.41166	1.49296	0.848092	0.941504	0.927238	0.546344	0.702381	0.574368	0.0251797	0.00761599	0.00404756
NZ_CP011454.1	392264	392821	+	CDS	GEMMAAP_RS01740	WP_145978946.1	hypothetical protein	6.1264	0.201859	0.0406242	0.123925	0.182077	0.0346494	0.259053	1.87365	1.4097	2.09125	0.476398	0.959768	0.902521	0.607812	0.947436	0.394399	1.05e-10	2.17e-08	2.21e-11
NZ_CP011454.1	2935131	2935892	-	CDS	GEMMAAP_RS12450	WP_026849519.1	SAM-dependent chlorinase/fluorinase	5.51686	0.201714	-0.0998663	0.0351228	0.271452	0.028405	0.180818	0.440649	0.0466627	0.477712	0.420903	0.893174	0.992231	0.344592	0.955517	0.522293	0.00566384	0.7948	0.00345954
NZ_CP011454.1	1154328	1156262	-	CDS	GEMMAAP_RS04760	WP_158514736.1	DbpA RNA binding domain-containing protein	7.54688	0.200856	-0.0715033	0.00818437	0.229148	0.204916	0.0032394	-0.328998	-0.130696	-0.328064	0.407866	0.929364	0.999712	0.408211	0.434736	0.997347	0.0355043	0.428957	0.0358487
NZ_CP011454.1	814932	815528	-	CDS	GEMMAAP_RS19925	WP_053334305.1	YggT family protein	7.18655	0.200714	-0.281332	-0.253658	-0.126265	-0.360976	-0.231819	0.306483	-0.0669736	0.0663879	0.537335	0.642887	0.686835	0.765019	0.268953	0.52046	0.122158	0.766489	0.749327
NZ_CP011454.1	1686684	1687961	-	CDS	GEMMAAP_RS07005	WP_158514762.1	glycoside hydrolase	6.0416	0.200568	0.0577152	0.117851	-0.186789	0.000340809	-0.00838339	0.483079	-0.040453	0.243914	0.311516	0.929364	0.831733	0.439168	0.999236	0.992277	0.000347383	0.776071	0.0523049
NZ_CP011454.1	1740259	1740582	+	CDS	GEMMAAP_RS07230	WP_026850430.1	thioredoxin	7.27816	0.199772	-0.102367	-0.116861	0.0912029	0.0647799	-0.0386935	-0.782461	-0.934364	-1.04574	0.316704	0.858729	0.823223	0.729831	0.80851	0.909575	1.14e-06	1.6e-07	1.41e-08
NZ_CP011454.1	75273	76619	+	CDS	GEMMAAP_RS00320	WP_026848977.1	hemolysin family protein	5.00629	0.199675	-0.173062	0.174366	0.305756	0.196649	0.279865	0.16645	0.052546	0.355193	0.439769	0.771547	0.793263	0.295909	0.474741	0.294014	0.289757	0.854133	0.0290266
NZ_CP011454.1	4708463	4709878	-	CDS	GEMMAAP_RS19845	WP_053333843.1	DUF2156 domain-containing protein	5.26625	0.199436	0.0519777	0.164696	0.0918622	0.0457504	0.0363343	0.724039	0.274853	0.828937	0.557005	0.953828	0.874425	0.853499	0.938341	0.951849	0.000654209	0.187979	0.000185267
NZ_CP011454.1	2759234	2761828	-	CDS	GEMMAAP_RS11750	WP_075071501.1	DUF1592 domain-containing protein	5.65925	0.199281	0.127884	0.0462959	-0.190994	-0.141915	-0.0213111	0.266662	0.501993	0.0377742	0.45662	0.860884	0.992231	0.564538	0.649777	0.967722	0.101624	0.00438494	0.832213
NZ_CP011454.1	4082306	4083193	+	CDS	GEMMAAP_RS17215	WP_053333572.1	hypothetical protein	5.0087	0.199025	0.241994	0.215845	-0.231137	-0.109639	0.0470252	0.725236	0.268386	0.84486	0.457279	0.619511	0.719065	0.480743	0.736871	0.992585	6.58e-05	0.113086	1.1e-05
NZ_CP011454.1	3631780	3632748	+	CDS	GEMMAAP_RS15345	WP_026848496.1	protochlorophyllide reductase	5.46175	0.198966	-0.0894599	0.237171	0.159516	-1.12098	0.436735	0.638658	-0.0379792	0.460701	0.490616	0.921679	0.693232	0.66065	5.93e-05	0.125864	0.00064647	0.854273	0.011058
NZ_CP011454.1	3299058	3299540	+	CDS	GEMMAAP_RS13980	WP_053333735.1	nuclear transport factor 2 family protein	1.03118	0.198499	-0.525686	0.508856	0.430613	0.433757	0.0398431	0.035638	-0.266409	0.485617	0.854986	0.785664	0.833372	0.669306	0.609152	0.985997	0.941019	0.61989	0.308161
NZ_CP011454.1	591847	592926	-	CDS	GEMMAAP_RS02630	WP_026849314.1	dihydrodipicolinate synthetase	7.00949	0.198389	0.460653	1.26686	0.109064	0.0224278	0.290381	-0.145221	-0.103099	-0.227954	0.769372	0.683291	0.0890995	0.901657	0.991437	0.671226	0.681991	0.794885	0.516663
NZ_CP011454.1	1139464	1140639	-	CDS	GEMMAAP_RS04705	WP_082821068.1	ABC transporter ATP-binding protein	6.0824	0.198115	0.242355	0.0969332	0.193201	0.0294865	0.158545	-0.163925	-0.10614	-0.15601	0.230775	0.306577	0.838482	0.320134	0.956014	0.395099	0.121971	0.347383	0.145286
NZ_CP011454.1	2354532	2355476	-	CDS	GEMMAAP_RS10000	WP_043581633.1	DMT family transporter	6.1398	0.197809	-0.0264036	0.242131	0.164507	0.220763	0.382322	0.557467	0.311231	0.474872	0.343896	0.965329	0.522815	0.521003	0.308659	0.0847679	0.000114912	0.0231001	0.000750754
NZ_CP011454.1	2637533	2638504	-	CDS	GEMMAAP_RS11250	WP_053334136.1	alpha/beta hydrolase	5.45111	0.197802	-0.449709	-0.326993	-0.148177	-0.474896	-0.445771	-0.888282	-1.43857	-1.44782	0.582643	0.368499	0.638804	0.751044	0.160788	0.19808	0.000178897	8.07e-07	5.61e-07
NZ_CP011454.1	2060333	2062012	+	CDS	GEMMAAP_RS08570	WP_053334441.1	protein translocase subunit SecD	8.17322	0.197634	-0.115644	-0.144845	-0.200011	0.0414115	-0.0268442	0.216057	0.495208	0.0237342	0.382313	0.858729	0.772071	0.445976	0.914671	0.950824	0.13399	0.00179417	0.876729
NZ_CP011454.1	3766503	3767459	+	CDS	GEMMAAP_RS15925	WP_145979176.1	hypothetical protein	5.6855	0.197599	-0.268954	-0.382761	0.154706	-0.104587	-0.164071	-0.607037	-0.454291	-0.936689	0.578008	0.704858	0.55481	0.731645	0.81434	0.697691	0.00540144	0.0402461	0.000133277
NZ_CP011454.1	127819	128031	+	CDS	GEMMAAP_RS00540	WP_202969172.1	DUF433 domain-containing protein	4.83696	0.197417	-0.228221	0.206209	0.263034	0.205165	0.185401	0.962874	0.688379	1.19329	0.526868	0.733406	0.794028	0.465127	0.534666	0.608428	7.94e-06	0.000740631	3.98e-07
NZ_CP011454.1	1241104	1241958	+	CDS	GEMMAAP_RS20810	WP_026849974.1	PEP-CTERM sorting domain-containing protein	8.56074	0.197386	0.00428669	-0.152929	-0.0255321	-0.0871891	-0.0335547	0.0942947	-0.304296	-0.182927	0.432499	0.999855	0.794423	0.959961	0.787344	0.943296	0.562008	0.0683892	0.247734
NZ_CP011454.1	153290	153904	+	CDS	GEMMAAP_RS20445	WP_053333878.1	TetR/AcrR family transcriptional regulator	4.54133	0.197107	-0.0353526	0.163871	0.400588	0.10405	0.0288614	0.337472	-0.176861	0.319109	0.520702	0.971468	0.854737	0.228708	0.779897	0.967722	0.060834	0.365838	0.082355
NZ_CP011454.1	2495226	2495750	-	CDS	GEMMAAP_RS10645	WP_026849784.1	hypothetical protein	6.4928	0.197039	-0.180677	-0.104045	0.422774	0.0657043	0.386609	0.401945	0.235073	0.553996	0.400456	0.731305	0.999712	0.107971	0.838664	0.107999	0.00800005	0.127246	0.000562129
NZ_CP011454.1	4093649	4094683	-	CDS	GEMMAAP_RS17265	WP_026848219.1	DUF1835 domain-containing protein	7.17223	0.196636	0.306593	0.209125	0.16537	0.0171692	0.291819	0.218063	-0.379639	0.272827	0.349871	0.306365	0.593276	0.512774	0.978946	0.182652	0.101778	0.00796817	0.0417493
NZ_CP011454.1	3670246	3672915	+	CDS	GEMMAAP_RS15535	WP_202969151.1	von Willebrand factor type A domain-containing protein	9.79612	0.19616	-0.170333	-0.0136109	-0.549871	-0.460446	-0.425154	-1.52854	-1.86803	-1.32048	0.846368	0.941504	0.999712	0.539704	0.605932	0.654546	0.00364637	0.00104446	0.00969031
NZ_CP011454.1	3185901	3186623	-	CDS	GEMMAAP_RS20325	WP_158514861.1	DsbA family protein	7.54823	0.195853	-0.0802237	-0.147933	-0.280534	-0.288006	-0.223513	0.602223	0.0652953	0.388071	0.459141	0.92607	0.831733	0.349216	0.295898	0.452101	0.000754463	0.72673	0.020972
NZ_CP011454.1	3530921	3531226	-	CDS	GEMMAAP_RS14910	WP_158514881.1	hypothetical protein	5.5038	0.195627	-0.0269464	0.174158	0.315666	0.148162	0.0713916	-0.618954	-0.480892	-0.634186	0.4219	0.966762	0.752824	0.253338	0.59482	0.841138	0.000238393	0.00384593	0.000271276
NZ_CP011454.1	3890781	3891848	+	CDS	GEMMAAP_RS16440	WP_026848335.1	NADH:flavin oxidoreductase/NADH oxidase	5.73926	0.195503	0.0521541	0.058862	0.136934	0.207586	0.0379046	0.961495	0.575707	1.00217	0.393642	0.941504	0.972791	0.645751	0.386625	0.926079	1.93e-07	0.000340264	1.17e-07
NZ_CP011454.1	316163	317245	-	CDS	GEMMAAP_RS01405	WP_053333918.1	ADP-ribosylglycohydrolase family protein	5.97675	0.195445	0.181131	0.0954305	0.129438	0.21873	0.140428	0.893713	0.904075	0.923999	0.359116	0.66909	0.985589	0.643538	0.327589	0.581296	2.19e-07	3.88e-07	1.45e-07
NZ_CP011454.1	2310016	2311833	-	CDS	GEMMAAP_RS09785	WP_053334494.1	hypothetical protein	6.74941	0.195379	0.0311604	0.205493	0.24361	0.200246	0.189798	0.201556	0.0737247	0.219291	0.351504	0.959768	0.664015	0.308004	0.369533	0.419557	0.12803	0.614907	0.0979875
NZ_CP011454.1	4069329	4069865	-	CDS	GEMMAAP_RS17160	WP_043579341.1	DinB family protein	5.77261	0.195329	-0.147935	0.178193	0.479506	0.178509	0.413569	0.334884	0.12119	0.478939	0.407236	0.790303	0.739141	0.0728686	0.486112	0.095889	0.0236285	0.440432	0.00218882
NZ_CP011454.1	3137253	3137816	+	CDS	GEMMAAP_RS13295	WP_053333770.1	TetR/AcrR family transcriptional regulator	5.3865	0.195228	-0.123937	0.0432161	0.443672	0.125003	0.236324	0.318213	0.213666	0.612276	0.436353	0.859825	0.992231	0.11342	0.673954	0.379204	0.0384208	0.184942	0.000304142
NZ_CP011454.1	1506149	1506700	+	CDS	GEMMAAP_RS06205	WP_043581328.1	putative metal-dependent hydrolase	6.3733	0.194824	0.0800993	0.0265908	-0.0479888	0.151507	-0.0989156	1.18842	0.958848	1.20187	0.459269	0.92505	0.999594	0.913886	0.617537	0.783783	6.39e-08	3.22e-06	5.58e-08
NZ_CP011454.1	4668417	4670339	+	CDS	GEMMAAP_RS19670	WP_053333830.1	pyrroloquinoline quinone-dependent dehydrogenase	4.83643	0.194704	0.175456	0.225165	0.386152	0.154177	0.388102	0.688	0.471734	0.600215	0.476585	0.773772	0.705692	0.197082	0.619739	0.14638	0.000142253	0.00723521	0.000803189
NZ_CP011454.1	4506342	4509575	-	CDS	GEMMAAP_RS18990	WP_053334609.1	hypothetical protein	5.07727	0.194629	0.202916	0.333214	0.300299	0.243177	0.401331	0.325783	0.603872	0.590909	0.551812	0.773772	0.57801	0.402509	0.460254	0.196049	0.0850764	0.00331879	0.00338859
NZ_CP011454.1	4113361	4114017	+	CDS	GEMMAAP_RS17355	WP_026848205.1	hypothetical protein	4.02613	0.194236	0.316751	-0.0212541	-0.0775305	0.171539	0.00509708	0.217377	0.203398	0.361638	0.50187	0.460052	0.999712	0.887816	0.583109	0.996617	0.194752	0.257905	0.0394632
NZ_CP011454.1	1378870	1379832	+	CDS	GEMMAAP_RS05730	WP_026849871.1	hypothetical protein	4.85686	0.194115	-0.0205554	-0.0904716	-0.119731	-0.301536	-0.237475	0.148005	-0.425053	-0.0340142	0.598192	0.986214	0.971133	0.80851	0.403928	0.546578	0.485203	0.0587046	0.883156
NZ_CP011454.1	929599	930144	-	CDS	GEMMAAP_RS03885	WP_026850166.1	cob(I)yrinic acid a%2Cc-diamide adenosyltransferase	6.41704	0.194006	0.0970234	0.170837	-0.168041	0.15691	-0.0947915	0.587299	0.0835046	0.676605	0.410374	0.891095	0.833372	0.572929	0.55358	0.768624	0.00028356	0.609568	5.96e-05
NZ_CP011454.1	4205860	4206318	+	CDS	GEMMAAP_RS17735	WP_026848151.1	hypothetical protein	4.75125	0.193725	0.0827419	0.120538	-0.164968	-0.0273818	-0.00544071	0.646321	0.412152	0.596108	0.50947	0.928979	0.916793	0.661856	0.963745	0.999269	0.000545189	0.0249779	0.00152713
NZ_CP011454.1	4302410	4302820	+	CDS	GEMMAAP_RS18130	WP_053333523.1	response regulator	4.92079	0.193672	-0.150507	-0.00562568	0.45883	0.718997	0.272676	1.32527	0.806578	1.13506	0.50187	0.837412	0.999712	0.146445	0.00352349	0.35837	1.86e-08	5.43e-05	2.56e-07
NZ_CP011454.1	1558174	1559532	-	CDS	GEMMAAP_RS06470	WP_145979033.1	BCD family MFS transporter	8.14278	0.193452	-0.0125514	0.326084	0.140711	0.159738	0.163053	-0.153136	0.130252	-0.230751	0.382727	0.988391	0.323612	0.605918	0.521673	0.526499	0.277694	0.386839	0.100922
NZ_CP011454.1	3676198	3677297	+	CDS	GEMMAAP_RS15560	WP_145979169.1	IS3 family transposase	7.69405	0.193058	-0.722475	-0.419336	-0.0741623	-0.518125	-0.699275	-1.80991	-2.2148	-2.12406	0.659606	0.12281	0.537139	0.907966	0.196155	0.0987581	1.74e-07	2.16e-08	1.78e-08
NZ_CP011454.1	1860900	1861424	+	CDS	GEMMAAP_RS07700	WP_043581560.1	hypoxanthine phosphoribosyltransferase	8.63105	0.192689	-0.299108	-0.326759	0.302309	-0.0918557	-0.0279817	-0.586618	-0.459894	-0.785993	0.4427	0.449408	0.417442	0.263113	0.77721	0.953224	0.000678012	0.00713312	2.31e-05
NZ_CP011454.1	1316721	1317320	-	CDS	GEMMAAP_RS05525	WP_026849904.1	hypothetical protein	4.16088	0.192407	-0.0166788	-0.26735	-0.0571188	0.113058	-0.133653	0.756399	0.499265	0.663374	0.509573	0.986214	0.682343	0.907645	0.742229	0.708426	7.15e-05	0.00642088	0.0004621
NZ_CP011454.1	3616225	3616434	-	CDS	GEMMAAP_RS15280	WP_026848504.1	cation transporter	4.23336	0.192276	0.153702	0.0726373	-0.15016	0.279913	-0.0986256	0.987668	1.24277	1.30768	0.74447	0.921211	0.992231	0.846423	0.619223	0.902539	0.00139233	0.000217001	9.12e-05
NZ_CP011454.1	67344	68567	+	CDS	GEMMAAP_RS00290	WP_026848973.1	aminotransferase class I/II-fold pyridoxal phosphate-dependent enzyme	6.64248	0.192262	0.0416519	0.198178	0.140911	-0.0137476	0.109852	0.139125	-0.317064	0.155701	0.364872	0.944556	0.631189	0.598552	0.981948	0.678523	0.296572	0.0252827	0.24389
NZ_CP011454.1	1379959	1382736	+	CDS	GEMMAAP_RS05735	WP_082821095.1	serine/threonine protein kinase	6.30905	0.192057	0.241478	0.580563	0.233957	-0.0312991	0.31477	0.806093	0.392635	1.00117	0.455627	0.600456	0.0890995	0.440251	0.94783	0.224499	1.38e-05	0.0188019	6.3e-07
NZ_CP011454.1	2521462	2523420	-	CDS	GEMMAAP_RS10750	WP_053334159.1	biosynthetic arginine decarboxylase	7.50308	0.191849	0.118851	0.0251764	-0.0647233	0.0741179	-0.113413	-0.860433	-0.901625	-0.926378	0.351301	0.829225	0.992231	0.824138	0.78126	0.663088	4.32e-07	4.35e-07	1.4e-07
NZ_CP011454.1	4227446	4228669	-	CDS	GEMMAAP_RS17820	WP_026848138.1	hypothetical protein	4.80971	0.191819	0.137848	0.025512	-0.14976	-0.00672491	0.141216	0.86443	0.295395	0.848021	0.391442	0.790303	0.996605	0.609708	0.996447	0.59613	5.13e-07	0.0394437	8.76e-07
NZ_CP011454.1	149332	149481	+	CDS	GEMMAAP_RS20440	WP_158514673.1	hypothetical protein	0.208371	0.191738	-0.614646	0.91237	-0.769189	-0.673972	-0.139306	2.01867	1.11057	1.53126	0.922017	0.864314	0.770896	0.698221	0.674973	0.951849	0.000789807	0.0950942	0.019969
NZ_CP011454.1	2786123	2786284	+	CDS	GEMMAAP_RS20580	WP_158514840.1	hypothetical protein	1.88931	0.190844	0.663503	0.195255	-0.156505	-0.0155814	0.367824	1.17673	1.8894	2.04959	0.872461	0.666743	0.985589	0.917421	0.999236	0.720904	0.00954598	0.000160444	5.16e-05
NZ_CP011454.1	430017	430562	+	CDS	GEMMAAP_RS01915	WP_026849205.1	DUF4256 domain-containing protein	5.29113	0.19065	0.607208	0.331572	0.554115	0.300551	0.292449	1.39079	1.53087	1.40992	0.590828	0.092305	0.605839	0.129353	0.376427	0.41174	1.2e-07	5.55e-08	1.1e-07
NZ_CP011454.1	3683192	3684121	-	CDS	GEMMAAP_RS15585	WP_158514890.1	phosphatase PAP2 family protein	5.90259	0.190281	0.235734	0.335226	-0.198468	-0.115471	0.203425	-0.0901945	-0.267584	0.0741578	0.79215	0.889881	0.833372	0.810672	0.896946	0.797638	0.809374	0.489215	0.847521
NZ_CP011454.1	1645458	1646318	+	CDS	GEMMAAP_RS06825	WP_026850365.1	RNA polymerase sigma factor RpoD/SigA	7.28462	0.190183	0.0146689	0.00370586	-0.0399025	-0.105402	-0.073598	0.0402626	-0.265714	-0.156461	0.385047	0.985307	0.999712	0.913211	0.696669	0.812906	0.780625	0.0683507	0.258673
NZ_CP011454.1	839094	840056	-	CDS	GEMMAAP_RS03555	WP_026850215.1	exosortase/archaeosortase family protein	8.9892	0.189702	0.0934966	-0.0474453	-0.0039706	0.122718	0.0322697	0.397029	0.117887	0.0761231	0.292817	0.858526	0.966084	0.994121	0.55358	0.918819	0.00136615	0.339255	0.517394
NZ_CP011454.1	2466400	2468364	+	CDS	GEMMAAP_RS10520	WP_026849800.1	glucosamine-6-phosphate deaminase	9.21669	0.189519	-0.132928	0.048896	0.40619	-0.578725	0.210427	0.433792	-0.0982601	0.454034	0.644102	0.907624	0.992231	0.316683	0.119292	0.652946	0.0672281	0.710274	0.0540695
NZ_CP011454.1	3827105	3829336	+	CDS	GEMMAAP_RS16175	WP_145979185.1	response regulator	6.14844	0.189397	0.102701	0.0713743	0.289918	0.136388	0.238895	0.0963545	0.240218	0.0624401	0.358081	0.860884	0.938132	0.206525	0.557253	0.265848	0.460057	0.0751385	0.699202
NZ_CP011454.1	3998698	4002570	+	CDS	GEMMAAP_RS16890	WP_026848268.1	hypothetical protein	5.58015	0.189348	0.128864	-0.0388378	0.361936	0.166064	0.371703	-0.218127	0.177754	-0.0909451	0.439769	0.840602	0.992231	0.181741	0.539533	0.127875	0.148857	0.265335	0.566922
NZ_CP011454.1	2899703	2900965	+	CDS	GEMMAAP_RS12290	WP_026849542.1	ATP-dependent Clp protease ATP-binding subunit ClpX	8.95948	0.189275	-0.128142	-0.24048	-0.0228201	-0.140992	-0.105185	-0.134524	-0.202304	-0.268977	0.316704	0.773772	0.432666	0.95172	0.505864	0.66181	0.266524	0.109624	0.0280363
NZ_CP011454.1	3530546	3530896	-	CDS	GEMMAAP_RS14905	WP_043579434.1	ferredoxin	5.50141	0.189087	0.0856309	0.00570044	0.32869	0.110436	0.142946	-1.26905	-0.922022	-1.08152	0.4692	0.91699	0.999712	0.257065	0.728034	0.654546	3.2e-08	7.36e-06	6.53e-07
NZ_CP011454.1	3001152	3001502	-	CDS	GEMMAAP_RS12730	WP_026849473.1	hypothetical protein	6.04848	0.189068	0.143463	-0.0133097	0.278164	0.0453985	0.0700627	0.226004	-0.159654	0.84319	0.468952	0.830894	0.999712	0.349216	0.918159	0.859971	0.155247	0.350348	9.25e-06
NZ_CP011454.1	2590785	2592356	+	CDS	GEMMAAP_RS11010	WP_158514823.1	DUF4403 family protein	5.86713	0.189021	-0.399782	0.223419	-0.298571	-0.417457	-0.47268	0.122225	-0.0272364	-0.287309	0.769191	0.731185	0.912303	0.661856	0.457983	0.417831	0.712168	0.946162	0.384625
NZ_CP011454.1	394836	395399	+	CDS	GEMMAAP_RS20220	WP_026849182.1	transcriptional regulator	6.23723	0.188972	0.121321	0.0866358	0.183581	0.0494055	-0.0174762	1.28659	0.789676	1.51362	0.47507	0.864314	0.942518	0.570732	0.906526	0.978389	1.79e-08	4.18e-05	1.3e-09
NZ_CP011454.1	1259996	1261528	-	CDS	GEMMAAP_RS05280	WP_075071435.1	glutamate formimidoyltransferase	5.69918	0.188481	0.136764	0.205293	-0.192943	-0.0978657	-0.0328474	0.281216	-0.129596	0.139706	0.320349	0.741517	0.564863	0.39335	0.671127	0.921021	0.0190209	0.305174	0.24214
NZ_CP011454.1	4255353	4256741	+	CDS	GEMMAAP_RS17945	WP_043579308.1	L-serine ammonia-lyase%2C iron-sulfur-dependent%2C subunit alpha	5.14903	0.18792	0.411577	0.154072	0.375476	0.132632	0.433725	0.0448791	-0.23937	0.234714	0.586775	0.373254	0.886205	0.302949	0.739284	0.184283	0.830071	0.259818	0.243655
NZ_CP011454.1	3312348	3313304	+	CDS	GEMMAAP_RS14055	WP_026848688.1	ribonuclease Z	5.86876	0.18787	0.0317896	-0.110877	-0.247153	-0.10841	-0.152697	0.957267	0.550796	1.14067	0.502857	0.965706	0.966226	0.460242	0.747224	0.654058	2.94e-06	0.00270872	2.27e-07
NZ_CP011454.1	4346322	4349105	-	CDS	GEMMAAP_RS18325	WP_026850891.1	phosphoenolpyruvate carboxylase	6.77692	0.187814	0.141279	0.491408	0.445545	0.288916	0.37959	-0.0228452	-0.024018	0.0808704	0.410157	0.791958	0.103572	0.0850206	0.212122	0.107809	0.97138	0.887782	0.585406
NZ_CP011454.1	1160134	1162125	+	CDS	GEMMAAP_RS04785	WP_053334253.1	ATP-binding protein	7.57632	0.187695	-0.621881	-0.409818	-0.233142	-0.533586	-0.533678	-0.525624	-0.830873	-0.897796	0.656767	0.210117	0.537139	0.623328	0.164801	0.177583	0.0316684	0.00190946	0.000678
NZ_CP011454.1	1539061	1540341	+	CDS	GEMMAAP_RS06380	WP_043581333.1	competence/damage-inducible protein A	6.94462	0.187526	-0.477334	-0.0565411	0.0678133	-0.132498	-0.205221	-0.703754	-0.53587	-0.842503	0.495562	0.139431	0.984191	0.871223	0.687388	0.504466	0.000202369	0.00382803	2.63e-05
NZ_CP011454.1	3810858	3811313	+	CDS	GEMMAAP_RS16105	WP_158514896.1	DUF3429 domain-containing protein	3.65552	0.187255	0.219253	0.256622	-0.183798	0.122445	-0.00839017	0.0224107	-0.633669	0.197439	0.65962	0.810395	0.938132	0.726762	0.800367	0.996617	0.930186	0.0129313	0.40875
NZ_CP011454.1	2740539	2741615	+	CDS	GEMMAAP_RS11670	WP_158514833.1	DUF4097 family beta strand repeat-containing protein	7.71247	0.186979	-1.07209	-0.723656	-0.168849	-1.50121	-1.28975	2.34956	1.96821	1.70972	0.879084	0.471462	0.706381	0.913359	0.108819	0.184283	0.000478851	0.00277852	0.00558947
NZ_CP011454.1	3311751	3312080	-	CDS	GEMMAAP_RS20075	WP_202969140.1	hypothetical protein	10.6765	0.186442	0.121247	0.168588	0.153412	0.0258503	-0.0454017	0.0210831	-0.180214	-0.076197	0.433507	0.858729	0.726682	0.589464	0.956047	0.911379	0.896629	0.258449	0.623079
NZ_CP011454.1	4167017	4168132	-	CDS	GEMMAAP_RS17555	WP_026848178.1	exo-alpha-sialidase	6.62183	0.186439	0.0983373	0.144355	0.324414	0.251016	0.27132	0.75627	0.273906	0.811863	0.351504	0.860884	0.999712	0.152076	0.215729	0.187747	1.4e-06	0.0386042	4.87e-07
NZ_CP011454.1	3915736	3916785	+	CDS	GEMMAAP_RS16540	WP_082821419.1	ADP-glyceromanno-heptose 6-epimerase	5.58133	0.185991	0.0564414	0.0406024	0.137367	0.135141	0.126641	0.631141	0.585602	0.563362	0.437034	0.941504	0.992231	0.656851	0.626648	0.667305	0.000110428	0.000412292	0.000481601
NZ_CP011454.1	98897	99388	+	CDS	GEMMAAP_RS00410	WP_026848991.1	(2Fe-2S)-binding protein	5.59142	0.185955	0.148167	0.093434	0.502898	0.365348	0.401975	0.890171	0.821789	1.02065	0.411335	0.773772	0.992231	0.0586049	0.0936117	0.0894941	4.53e-07	3.03e-06	6.31e-08
NZ_CP011454.1	317345	317812	-	CDS	GEMMAAP_RS01410	WP_026849134.1	hypothetical protein	5.48247	0.185329	0.297175	0.223332	0.520677	0.478083	0.386141	2.53069	2.42343	2.48049	0.660557	0.700706	0.847642	0.206525	0.191899	0.322735	5.5e-11	3.68e-10	7.68e-11
NZ_CP011454.1	4345140	4346108	+	CDS	GEMMAAP_RS18320	WP_026850890.1	acyl-ACP desaturase	8.29084	0.185276	0.243549	1.08202	-0.354288	-0.117474	-0.163004	-0.0780235	0.234602	0.0982766	0.764879	0.863696	0.0987427	0.554965	0.87221	0.820177	0.816201	0.495224	0.769077
NZ_CP011454.1	3851099	3851968	-	CDS	GEMMAAP_RS16290	WP_026848360.1	HAD-IIA family hydrolase	4.85101	0.185039	0.0164557	-0.0455149	-0.0649293	-0.0571495	0.0921053	-0.0829831	-0.292387	-0.397615	0.485295	0.986022	0.992231	0.984334	0.879382	0.795761	0.610513	0.0839906	0.0191286
NZ_CP011454.1	4439496	4441889	-	CDS	GEMMAAP_RS18700	WP_202969165.1	TonB-dependent receptor	4.95704	0.184919	0.0839464	-0.0645367	-0.287281	-0.142951	0.0645552	0.639839	0.539944	0.577682	0.552203	0.930028	0.999712	0.418232	0.688916	0.893916	0.000885838	0.00543666	0.00275225
NZ_CP011454.1	4299561	4300970	-	CDS	GEMMAAP_RS18120	WP_053333524.1	M24 family metallopeptidase	5.12028	0.18489	0.0374134	0.0327419	0.10673	0.657101	0.0548767	0.780603	0.456702	0.50804	0.588026	0.965706	0.999712	0.815911	0.0253679	0.918819	0.000235814	0.0258249	0.0120858
NZ_CP011454.1	3469327	3470223	-	CDS	GEMMAAP_RS14680	WP_043579448.1	ABC transporter ATP-binding protein	3.76279	0.184822	0.134847	0.468427	0.741069	0.192503	0.519566	0.800038	0.384585	0.816976	0.654257	0.895311	0.510086	0.0706067	0.647386	0.144897	0.00053567	0.0925038	0.00063051
NZ_CP011454.1	1454884	1455666	-	CDS	GEMMAAP_RS06005	WP_026850237.1	enoyl-CoA hydratase/isomerase family protein	4.98254	0.184496	0.0404954	-0.0643254	0.0965045	0.0761027	0.0935162	0.601078	0.153486	0.737002	0.506767	0.958971	0.993197	0.800819	0.850793	0.798989	0.00065771	0.385335	8.55e-05
NZ_CP011454.1	4447620	4449074	-	CDS	GEMMAAP_RS18730	WP_145979242.1	oligosaccharide flippase family protein	4.58538	0.183943	-0.169213	0.686183	0.317036	0.343455	0.235428	-0.984027	-0.470005	-0.581021	0.621018	0.859825	0.166438	0.427012	0.327589	0.5414	5.85e-05	0.0363516	0.0106732
NZ_CP011454.1	503297	504862	+	CDS	GEMMAAP_RS02190	WP_043580154.1	PDZ domain-containing protein	7.70304	0.183717	-0.548972	-0.35415	-0.0329456	-0.256913	-0.357615	-0.305653	-0.53458	-0.719162	0.509573	0.0694359	0.429471	0.9518	0.376568	0.203397	0.0778565	0.00430296	0.000192125
NZ_CP011454.1	655086	658466	+	CDS	GEMMAAP_RS02850	WP_158514703.1	VCBS repeat-containing protein	5.07511	0.183698	-0.0633254	-0.140346	0.5196	0.285768	0.352347	0.149084	0.601118	0.167108	0.554965	0.941504	0.992231	0.11798	0.35394	0.239839	0.413802	0.00240056	0.369808
NZ_CP011454.1	81938	82648	-	CDS	GEMMAAP_RS00340	WP_053333864.1	hypothetical protein	5.67276	0.183511	0.0402131	-0.290316	0.0572337	0.0803053	-0.19153	-0.189967	-1.35881	-0.375629	0.700988	0.970461	0.769191	0.944118	0.902075	0.721885	0.467054	3.74e-05	0.153434
NZ_CP011454.1	4520008	4523424	-	CDS	GEMMAAP_RS19025	WP_053334611.1	hypothetical protein	6.67497	0.182943	-0.0195761	0.247179	0.0924552	0.04778	0.0952302	0.465574	0.618573	0.651207	0.446765	0.999855	0.573035	0.775477	0.907813	0.769852	0.00297646	0.000290442	0.000110649
NZ_CP011454.1	4197375	4197896	+	CDS	GEMMAAP_RS17710	WP_026848155.1	hypothetical protein	5.20318	0.182906	0.0172407	0.134063	-0.0897551	0.262617	0.0406638	1.03992	1.10932	1.13095	0.505524	0.985475	0.992231	0.819737	0.342907	0.932481	4.81e-07	3.86e-07	1.54e-07
NZ_CP011454.1	2278428	2278688	-	CDS	GEMMAAP_RS09625	WP_026850731.1	30S ribosomal protein S15	8.51609	0.182582	0.0619737	-0.124045	-0.0807886	-0.280159	0.0103122	0.202718	0.0935987	0.385756	0.700636	0.959768	0.946002	0.901375	0.55001	0.996617	0.442947	0.752011	0.136583
NZ_CP011454.1	2420372	2421130	-	CDS	GEMMAAP_RS10280	WP_145979089.1	hypothetical protein	9.93777	0.182554	-0.397277	-0.438133	-0.27974	-0.562336	-0.523924	-0.0549752	-0.00639814	-0.392698	0.626594	0.484008	0.429471	0.48028	0.100127	0.14193	0.81163	0.982702	0.072452
NZ_CP011454.1	475233	476552	-	CDS	GEMMAAP_RS02070	WP_158514692.1	outer membrane protein transport protein	2.86556	0.181626	0.312374	-0.511124	0.0667	-0.0886345	-0.081056	1.00105	0.25309	1.30519	0.721625	0.736424	0.623564	0.969006	0.889921	0.909575	0.000202587	0.354426	1.07e-05
NZ_CP011454.1	4446817	4447569	+	CDS	GEMMAAP_RS18725	WP_026850948.1	hypothetical protein	5.69019	0.181445	0.130618	0.123693	-0.033853	0.281581	0.145715	-1.8534	-1.94429	-2.15295	0.540025	0.864314	0.902521	0.956491	0.347142	0.678692	5.57e-10	9.8e-10	1.5e-10
NZ_CP011454.1	2150195	2150617	-	CDS	GEMMAAP_RS09025	WP_026850813.1	nucleoside-diphosphate kinase	6.64035	0.181035	0.0501808	-0.0176107	-0.146552	0.0153215	-0.0632753	-0.613717	-0.973085	-0.792488	0.459436	0.941976	0.999712	0.642437	0.981948	0.867175	0.000282459	1.47e-06	1.54e-05
NZ_CP011454.1	1536477	1536965	+	CDS	GEMMAAP_RS06360	WP_026850296.1	roadblock/LC7 domain-containing protein	6.66253	0.180806	0.129628	-0.184698	-0.318064	-0.257999	-0.253722	-0.221648	-0.36841	-0.443064	0.435783	0.831981	0.706381	0.221204	0.287411	0.303857	0.128877	0.0176703	0.0040906
NZ_CP011454.1	4673690	4674199	-	CDS	GEMMAAP_RS20155	WP_158514941.1	nuclear transport factor 2 family protein	5.32602	0.180675	-0.00805638	0.0665544	0.0669378	-0.0916666	0.141187	1.4974	1.26189	1.64585	0.536661	0.999579	0.999712	0.990139	0.800059	0.678793	2.92e-09	9.72e-08	6.75e-10
NZ_CP011454.1	3089342	3091228	+	CDS	GEMMAAP_RS13100	WP_026848832.1	signal peptide peptidase SppA	6.40056	0.18057	-0.163332	0.00564112	-0.189722	-0.16743	-0.183891	-0.181432	-0.351351	-0.302613	0.555329	0.831981	0.999712	0.613856	0.629487	0.608347	0.32114	0.0683507	0.101607
NZ_CP011454.1	1255445	1255621	+	CDS	GEMMAAP_RS05245	WP_026849953.1	50S ribosomal protein L30	7.14126	0.180395	-0.143874	-0.142518	0.0162745	0.295231	-0.0922766	-0.892869	-0.400124	-1.23833	0.470002	0.826204	0.825892	0.978117	0.24504	0.790013	3.32e-06	0.0160762	2.82e-08
NZ_CP011454.1	2564752	2565780	-	CDS	GEMMAAP_RS10915	WP_202969115.1	polysaccharide deacetylase	5.41927	0.180187	0.176713	-0.00957646	0.429351	0.500505	0.502281	0.393968	0.5349	0.489431	0.576102	0.814288	0.999712	0.206525	0.0891574	0.103571	0.0359987	0.00750073	0.0119814
NZ_CP011454.1	1683227	1684321	-	CDS	GEMMAAP_RS06990	WP_026850391.1	redox-regulated ATPase YchF	7.318	0.179804	-0.0148075	0.0934604	0.277482	0.423535	0.239954	0.487486	0.717251	0.638972	0.299825	0.986631	0.847642	0.157355	0.00972592	0.185156	9.19e-05	8.78e-07	2.45e-06
NZ_CP011454.1	4334671	4335090	-	CDS	GEMMAAP_RS18275	WP_043581799.1	cupin domain-containing protein	5.41651	0.179733	0.130265	-0.0911893	0.0864683	0.08624	0.116975	-0.141179	-0.0426016	-0.21857	0.51575	0.860884	0.98832	0.824138	0.805052	0.738499	0.396327	0.825489	0.197277
NZ_CP011454.1	4242964	4243785	+	CDS	GEMMAAP_RS17895	WP_026848125.1	fumarylacetoacetate hydrolase family protein	3.83704	0.179667	0.184378	0.0915878	-0.0923771	0.00384333	0.218168	0.557552	0.369033	0.462277	0.664239	0.853751	0.980694	0.878221	0.999236	0.616863	0.0120857	0.109472	0.0424462
NZ_CP011454.1	4463487	4464392	+	CDS	GEMMAAP_RS18790	WP_026850957.1	creatininase family protein	5.31208	0.17962	0.223095	0.150957	0.279615	0.241409	0.42927	-0.0254457	0.0318092	0.158532	0.54123	0.704858	0.856229	0.390822	0.415582	0.127875	0.891971	0.877503	0.45059
NZ_CP011454.1	2768923	2770359	+	CDS	GEMMAAP_RS11775	WP_158514835.1	FAD-dependent oxidoreductase	5.49773	0.179492	0.299711	0.13537	-0.243585	-0.338734	0.0168011	0.629158	0.0150562	0.572589	0.392412	0.306365	0.801771	0.326775	0.0992739	0.967822	2.45e-05	0.92398	9.65e-05
NZ_CP011454.1	3616514	3617434	-	CDS	GEMMAAP_RS15285	WP_202969148.1	VOC family protein	4.42114	0.179458	0.00158179	-0.205228	0.279041	0.513324	0.0166345	0.568006	0.975792	0.832999	0.716004	0.999855	0.899484	0.605918	0.214275	0.992877	0.0262387	0.000590337	0.0022485
NZ_CP011454.1	1356908	1357696	-	CDS	GEMMAAP_RS05660	WP_026849883.1	SGNH/GDSL hydrolase family protein	2.41795	0.179406	-0.0783573	0.0868532	-0.0789327	-0.289683	-0.256372	0.395865	-0.095019	0.436475	0.775979	0.953837	0.992231	0.941009	0.616692	0.67656	0.164311	0.784294	0.150682
NZ_CP011454.1	2762123	2763091	+	CDS	GEMMAAP_RS11755	WP_026849624.1	hypothetical protein	4.27944	0.178942	0.0306115	-0.28581	0.0803485	-0.219565	0.124971	0.324578	0.279463	-0.128271	0.561715	0.968826	0.661674	0.869035	0.494531	0.746766	0.0677534	0.135937	0.499563
NZ_CP011454.1	1039448	1041835	-	CDS	GEMMAAP_RS04330	WP_053334269.1	DUF1592 domain-containing protein	6.3942	0.178747	0.142815	0.112245	0.351627	0.204979	0.301108	1.31408	1.74626	1.34198	0.392811	0.758824	0.913286	0.140966	0.351008	0.153762	3.52e-10	1.14e-11	2.58e-10
NZ_CP011454.1	1626136	1626747	-	CDS	GEMMAAP_RS06745	WP_158514759.1	hypothetical protein	7.28299	0.178067	0.142483	-0.100706	-0.28286	-0.0935219	-0.170265	0.578656	0.495253	0.58757	0.479767	0.829225	0.912303	0.31853	0.769413	0.563201	0.000647359	0.00359717	0.000560822
NZ_CP011454.1	3659667	3660866	-	CDS	GEMMAAP_RS15485	WP_026848478.1	phosphodiester glycosidase family protein	4.5517	0.17779	0.111148	-0.0843763	0.104735	0.109225	0.0033358	-0.226188	-0.418861	-0.381276	0.469953	0.864314	0.996605	0.75453	0.71886	0.997347	0.128824	0.00967475	0.0167908
NZ_CP011454.1	724811	725974	-	CDS	GEMMAAP_RS03140	WP_053334004.1	ArgE/DapE family deacylase	7.50252	0.177336	0.0919072	0.325829	0.0193283	-0.0741651	-0.00981437	1.06103	0.738808	1.20166	0.541014	0.917341	0.510086	0.976101	0.84894	0.9942	1.49e-06	0.000254093	2.11e-07
NZ_CP011454.1	1366362	1368695	+	CDS	GEMMAAP_RS05670	WP_053334214.1	hypothetical protein	5.92343	0.177322	0.13814	0.157987	0.404251	0.32063	0.383068	0.600605	0.620054	0.423232	0.399358	0.775578	0.741717	0.0889659	0.119349	0.0847679	5.09e-05	5.9e-05	0.00237657
NZ_CP011454.1	1529801	1530319	+	CDS	GEMMAAP_RS06315	WP_053334328.1	YtxH domain-containing protein	8.16927	0.176848	-0.22393	-0.179664	0.118868	-0.0202999	-0.0279813	-0.0381428	-0.252962	-0.478051	0.508214	0.670433	0.746922	0.722711	0.977271	0.955523	0.827025	0.143395	0.00546444
NZ_CP011454.1	1432196	1432510	-	CDS	GEMMAAP_RS05920	WP_026849840.1	cupredoxin domain-containing protein	6.91414	0.176393	0.0480017	-0.327203	-0.194783	0.436148	-0.290811	0.515955	0.609255	0.666527	0.841796	0.982707	0.865382	0.840858	0.557619	0.742054	0.213763	0.162988	0.109187
NZ_CP011454.1	1922492	1923667	+	CDS	GEMMAAP_RS07940	WP_026850531.1	alanine racemase	7.97745	0.176306	-0.781798	-0.314149	-0.763106	-0.950053	-1.2338	-0.661557	-0.711552	-0.956743	0.835954	0.426947	0.85815	0.282169	0.144149	0.0847679	0.104213	0.0941468	0.0219726
NZ_CP011454.1	2201061	2201756	-	CDS	GEMMAAP_RS09285	WP_026850780.1	zf-HC2 domain-containing protein	7.45404	0.175414	-0.170678	-0.286948	-0.335587	-0.256029	-0.349772	-1.33299	-1.55825	-1.25103	0.80178	0.92505	0.849891	0.628547	0.70442	0.607413	0.000729987	0.000252244	0.00133233
NZ_CP011454.1	3273779	3274087	+	CDS	GEMMAAP_RS13865	WP_026848711.1	hypothetical protein	5.83108	0.175304	-0.0172704	0.111963	0.00104308	0.168024	0.00399715	0.969656	0.782952	0.890652	0.439769	0.980068	0.947959	0.999704	0.494531	0.996617	1.41e-07	6.62e-06	5.92e-07
NZ_CP011454.1	2845001	2846626	-	CDS	GEMMAAP_RS20585	WP_158514843.1	hypothetical protein	4.58376	0.175238	-0.0907852	0.079851	0.0393576	-0.0703304	0.228328	-0.669624	-0.940176	-0.908387	0.536177	0.91699	0.999712	0.940081	0.851595	0.446579	0.000320084	1.18e-05	1.69e-05
NZ_CP011454.1	1718801	1719634	+	CDS	GEMMAAP_RS07130	WP_026850412.1	sugar phosphate isomerase/epimerase	6.06178	0.175023	0.0824378	0.285739	0.126574	-0.115465	0.168067	0.29062	-0.2091	0.142624	0.466459	0.911883	0.510086	0.676914	0.687388	0.535795	0.0493879	0.179603	0.33795
NZ_CP011454.1	550884	551183	-	CDS	GEMMAAP_RS02440	WP_026849282.1	hypothetical protein	8.46968	0.174937	0.206751	-0.289826	-0.148113	-0.144941	-0.284149	-0.416227	-1.04959	-0.811351	0.675692	0.83508	0.683113	0.761626	0.757309	0.502625	0.0780277	0.000142974	0.00130595
NZ_CP011454.1	1019588	1020001	-	CDS	GEMMAAP_RS04240	WP_026850109.1	cytochrome c	5.99206	0.174457	0.153118	0.213078	0.311208	0.157879	0.186398	0.694831	0.568011	0.608308	0.54123	0.829225	0.726682	0.314887	0.619739	0.555228	0.000194576	0.00215218	0.000907643
NZ_CP011454.1	1595435	1596490	+	CDS	GEMMAAP_RS06635	WP_026850335.1	magnesium chelatase ATPase subunit I	6.33675	0.17436	0.388796	0.290844	0.0196759	-0.00224349	0.182619	0.818247	0.776066	0.803751	0.498745	0.252501	0.51547	0.9753	0.999236	0.523298	1.01e-05	3.55e-05	1.37e-05
NZ_CP011454.1	987348	987995	-	CDS	GEMMAAP_RS04115	WP_026850129.1	hypothetical protein	7.76686	0.173962	-1.12858	-0.572747	-0.233034	-1.19531	-0.885599	0.200643	-0.785769	-0.952024	0.849337	0.242194	0.664433	0.810034	0.0909143	0.224256	0.654395	0.0893933	0.034635
NZ_CP011454.1	883564	884955	+	CDS	GEMMAAP_RS03720	WP_026850192.1	nucleotide sugar dehydrogenase	7.94453	0.17392	-0.469531	-0.547412	-0.420055	-0.775833	-0.967464	-0.837276	-0.723001	-1.4855	0.748212	0.566131	0.484542	0.417487	0.0904154	0.0543497	0.00593649	0.0193854	2.39e-05
NZ_CP011454.1	3396253	3397092	-	CDS	GEMMAAP_RS14405	WP_043579453.1	metallophosphoesterase	5.13599	0.173762	0.0547035	0.0342137	0.103736	-0.0424131	-0.214056	-0.34612	-0.195398	-0.133122	0.484619	0.941504	0.992231	0.758686	0.982395	0.428705	0.0242026	0.222774	0.390992
NZ_CP011454.1	3941217	3942383	-	CDS	GEMMAAP_RS16650	WP_053333599.1	MFS transporter	4.95662	0.173438	0.00780342	-0.075387	0.102568	0.307347	0.133104	0.138107	-0.130555	0.100352	0.465883	0.997092	0.999712	0.748926	0.185175	0.639464	0.335204	0.399647	0.502992
NZ_CP011454.1	735457	736383	+	CDS	GEMMAAP_RS03190	WP_026849392.1	hypothetical protein	7.63527	0.172648	-0.0385807	0.062956	-0.179851	-0.0795367	-0.165846	0.484486	0.154266	0.503001	0.393642	0.947067	0.945973	0.450204	0.757334	0.473601	0.000533421	0.256116	0.000357939
NZ_CP011454.1	2201749	2202303	-	CDS	GEMMAAP_RS09290	WP_026850779.1	RNA polymerase sigma factor	7.62666	0.172643	-0.188049	-0.24809	-0.359833	-0.545529	-0.684874	-1.62504	-1.65721	-1.56052	0.840815	0.928979	0.915867	0.654773	0.429934	0.328935	0.000501445	0.000615454	0.000749503
NZ_CP011454.1	3634344	3635408	+	CDS	GEMMAAP_RS15355	WP_026848494.1	alpha/beta hydrolase	4.49021	0.172407	0.0393431	0.243494	0.0452753	0.0179805	-0.169021	1.54219	0.956697	1.88186	0.685528	0.967382	0.810005	0.954441	0.988823	0.722697	1.1e-07	0.000166143	5.16e-09
NZ_CP011454.1	3386044	3389652	+	CDS	GEMMAAP_RS14365	WP_053333715.1	PHP domain-containing protein	3.02568	0.172324	-0.113192	0.056385	0.118576	0.161399	-0.23319	0.777726	0.777235	1.14982	0.775979	0.941504	0.999594	0.883011	0.787344	0.703752	0.00666778	0.00967475	0.000253135
NZ_CP011454.1	2122740	2123492	-	CDS	GEMMAAP_RS08880	WP_053334542.1	polyprenol monophosphomannose synthase	6.61265	0.172118	-0.0817551	0.0483166	0.088832	-0.0267194	-0.0297139	0.409044	-0.0568688	0.319558	0.37104	0.885668	0.971133	0.731957	0.940763	0.932716	0.00146381	0.675968	0.0105515
NZ_CP011454.1	4527625	4528056	-	CDS	GEMMAAP_RS19055	WP_026850995.1	fimbrillin family protein	5.06888	0.172097	0.0167983	0.529354	-0.076836	-0.333089	-0.0720852	0.290445	0.355913	0.513253	0.652504	0.991568	0.342133	0.892688	0.355498	0.899233	0.162902	0.10412	0.0177567
NZ_CP011454.1	3141191	3142372	-	CDS	GEMMAAP_RS13310	WP_026848801.1	type IV pilus twitching motility protein PilT	7.28992	0.171776	0.256729	-0.0967745	0.0291671	-0.226828	-0.205583	-0.497865	-0.825132	-0.575213	0.697388	0.772486	0.971133	0.9753	0.613412	0.667719	0.0412429	0.00206733	0.0200574
NZ_CP011454.1	3525204	3526316	+	CDS	GEMMAAP_RS14875	WP_158514880.1	hypothetical protein	6.56255	0.171594	-0.0629936	-0.400074	-0.382901	-0.57495	-0.448692	-1.84234	-1.93882	-1.68134	0.823653	0.967382	0.768568	0.609708	0.355498	0.502246	5.69e-05	5.9e-05	0.000179361
NZ_CP011454.1	536639	537070	-	CDS	GEMMAAP_RS02365	WP_026849267.1	flagellar motor switch protein FliN	7.22059	0.171536	-0.0584784	-0.414689	-0.335246	-0.0417404	-0.272875	-0.114666	-0.280615	-0.371449	0.61472	0.947067	0.429471	0.350234	0.945536	0.440179	0.571143	0.178385	0.062724
NZ_CP011454.1	4694188	4694961	-	CDS	GEMMAAP_RS19790	WP_053333839.1	SET domain-containing protein-lysine N-methyltransferase	6.44728	0.171401	-0.149772	-0.0981042	0.0989375	-0.0262389	-0.0523116	-0.298212	-0.34242	-0.333574	0.459141	0.7794	0.904391	0.748657	0.951539	0.888193	0.039483	0.0242575	0.0237407
NZ_CP011454.1	1190974	1193010	+	CDS	GEMMAAP_RS04920	WP_053334250.1	heme lyase CcmF/NrfE family subunit	8.87883	0.171018	-0.213107	-0.00227248	0.13171	-0.207149	0.0836863	-0.555033	-0.449177	-0.949443	0.381287	0.531075	0.999712	0.575022	0.318983	0.752254	8.48e-05	0.00118026	3.85e-08
NZ_CP011454.1	4554963	4558793	+	CDS	GEMMAAP_RS19195	WP_026851015.1	carboxypeptidase-like regulatory domain-containing protein	9.23855	0.170951	0.00337315	-0.394195	-0.64348	-0.633241	-1.08024	0.884101	1.64811	0.55431	0.861945	0.999855	0.83523	0.450204	0.425104	0.16403	0.0620513	0.00206733	0.23023
NZ_CP011454.1	689316	691028	-	CDS	GEMMAAP_RS02985	WP_158514704.1	Ig-like domain-containing protein	8.03447	0.17087	-0.291292	-0.367256	-0.147259	-0.367829	-0.35653	-0.932528	-1.09839	-1.53468	0.623172	0.63755	0.510086	0.722617	0.26942	0.294014	6.23e-05	1.36e-05	5.78e-08
NZ_CP011454.1	4175701	4176447	-	CDS	GEMMAAP_RS17605	WP_082821451.1	AAA family ATPase	5.78815	0.170583	0.146678	-0.209993	-0.123505	-0.0898008	-0.00126328	0.681783	0.647629	0.740547	0.349871	0.701532	0.549436	0.600122	0.686143	0.998911	1.16e-06	4.86e-06	3.81e-07
NZ_CP011454.1	472166	473452	+	CDS	GEMMAAP_RS02050	WP_026849224.1	sulfite dehydrogenase	3.10674	0.170434	0.0120952	-0.267315	-0.311647	0.127445	-0.153918	0.559744	0.78421	0.317903	0.775979	0.999855	0.881202	0.632365	0.839636	0.812906	0.0426311	0.00792332	0.277685
NZ_CP011454.1	2743210	2743749	-	CDS	GEMMAAP_RS11680	WP_145979108.1	hypothetical protein	4.49246	0.170371	0.161773	-0.0562214	0.0874899	0.0301136	0.0216356	-0.0232186	-0.191338	-0.136681	0.663467	0.864082	0.992231	0.87368	0.970533	0.979342	0.920083	0.405642	0.5467
NZ_CP011454.1	4484441	4484866	-	CDS	GEMMAAP_RS18885	WP_053334603.1	DUF1579 family protein	5.80485	0.170243	0.130763	0.0879228	0.299427	0.26012	0.393893	1.01945	1.0716	1.2166	0.487832	0.83508	0.933954	0.272218	0.293494	0.107375	1.53e-07	1.48e-07	1.01e-08
NZ_CP011454.1	3477414	3479498	-	CDS	GEMMAAP_RS14710	WP_026848587.1	PBP1A family penicillin-binding protein	7.02804	0.170074	-0.449244	-0.228643	-0.305909	-0.450944	-0.420922	-0.306349	-0.722784	-1.02966	0.620145	0.316391	0.738009	0.399814	0.156914	0.196049	0.124929	0.00118128	1.58e-05
NZ_CP011454.1	1109168	1110247	+	CDS	GEMMAAP_RS04605	WP_082821063.1	aminopeptidase	5.36191	0.169814	-0.109484	0.00163944	-0.0259428	-0.179868	-0.102827	-0.175894	-0.226584	-0.107596	0.444442	0.860884	0.999712	0.981842	0.444573	0.717354	0.196628	0.115583	0.444638
NZ_CP011454.1	2918088	2919482	-	CDS	GEMMAAP_RS12365	WP_202969127.1	phosphoglucosamine mutase	6.92593	0.169346	-0.0465005	-0.117473	0.118972	0.0819033	-0.132607	-0.0240564	-0.15872	-0.00730641	0.45662	0.941976	0.850726	0.676914	0.77721	0.63239	0.873091	0.291289	0.961285
NZ_CP011454.1	4089916	4090443	-	CDS	GEMMAAP_RS17250	WP_026848220.1	DinB family protein	2.63137	0.169343	0.596965	0.346024	0.284748	0.0463094	0.264154	-0.884919	-0.426272	-0.793877	0.735479	0.27187	0.726682	0.586413	0.981948	0.581296	0.00146083	0.11755	0.00719948
NZ_CP011454.1	4138202	4138885	+	CDS	GEMMAAP_RS17445	WP_026848195.1	hypothetical protein	6.01485	0.169271	-0.141817	-0.13229	-0.0883882	-0.172353	-0.0262301	-0.293511	-0.223965	-0.191352	0.392811	0.74417	0.793263	0.742783	0.414254	0.9942	0.01997	0.0846433	0.127039
NZ_CP011454.1	4192498	4192767	-	CDS	GEMMAAP_RS17685	WP_026848158.1	hypothetical protein	5.13507	0.169259	0.0751961	-0.173854	-0.224923	-0.085749	-0.198697	0.38076	-0.733985	0.426286	0.74447	0.949411	0.927238	0.706965	0.899631	0.726435	0.153101	0.0127768	0.114758
NZ_CP011454.1	2949770	2951329	+	CDS	GEMMAAP_RS12525	WP_026849506.1	2%2C3-bisphosphoglycerate-independent phosphoglycerate mutase	8.01946	0.169064	-0.337767	-0.313158	-0.226267	-0.274493	-0.397676	0.273791	0.104475	0.0787176	0.576102	0.460052	0.523621	0.504426	0.369419	0.184283	0.132264	0.602644	0.675519
NZ_CP011454.1	3181711	3182409	-	CDS	GEMMAAP_RS13460	WP_053333762.1	heme exporter protein CcmB	6.04183	0.16849	-0.272684	-0.182074	0.207638	-0.10885	-0.128326	-0.739824	-1.00406	-0.559918	0.490522	0.488888	0.737209	0.470129	0.709507	0.668791	2.57e-05	7.89e-07	0.000737592
NZ_CP011454.1	2450889	2451380	-	CDS	GEMMAAP_RS10420	WP_075071485.1	Rrf2 family transcriptional regulator	6.82404	0.168435	0.0318877	0.0397145	0.113689	-0.0449152	0.0409361	0.494708	0.0541439	0.562358	0.524836	0.965706	0.992231	0.738217	0.919824	0.930759	0.00338964	0.768678	0.00115622
NZ_CP011454.1	4709888	4710544	+	CDS	GEMMAAP_RS19850	WP_053333844.1	uracil phosphoribosyltransferase	5.51178	0.167867	0.118664	0.104639	0.160082	0.107613	0.0447464	1.07027	0.712848	1.16006	0.461303	0.840276	0.966084	0.570732	0.689262	0.903544	2.29e-08	1.99e-05	6.95e-09
NZ_CP011454.1	2972223	2973023	+	CDS	GEMMAAP_RS12605	WP_026849493.1	prolipoprotein diacylglyceryl transferase	4.6844	0.167631	-0.0790771	0.212793	0.180803	-0.0856958	0.0060432	1.09666	0.43908	1.35136	0.69742	0.941504	0.847642	0.71915	0.869204	0.996838	1.97e-05	0.0607707	1.19e-06
NZ_CP011454.1	2508316	2509209	-	CDS	GEMMAAP_RS10700	WP_026849775.1	hypothetical protein	5.16762	0.167622	0.126627	0.088202	-0.195403	-0.112624	-0.233239	-0.113371	-0.483558	-0.168591	0.559724	0.864314	0.950562	0.577712	0.742078	0.452101	0.511401	0.0091252	0.334842
NZ_CP011454.1	2603259	2604176	+	CDS	GEMMAAP_RS11075	WP_026849719.1	flap endonuclease	4.44757	0.166959	-0.116928	-0.147606	0.299275	0.128804	0.0400605	-0.1036	-0.317664	-0.0891688	0.573012	0.885226	0.874425	0.352594	0.70149	0.997706	0.550738	0.0807774	0.624651
NZ_CP011454.1	3942503	3944881	+	CDS	GEMMAAP_RS16655	WP_026848304.1	S9 family peptidase	5.59116	0.166849	-0.0319643	0.202514	0.362429	0.289462	0.273153	0.683427	0.601441	0.481688	0.508427	0.964279	0.705692	0.180255	0.241913	0.28307	6.07e-05	0.000423536	0.00275717
NZ_CP011454.1	4337811	4338224	-	CDS	GEMMAAP_RS18290	WP_026850885.1	hypothetical protein	5.15876	0.166496	-0.0937859	-0.219733	-0.231997	0.0660712	0.0131935	0.391392	0.403656	0.333861	0.42903	0.871495	0.607185	0.353031	0.809226	0.979342	0.00351202	0.00387313	0.0129614
NZ_CP011454.1	999644	1000669	-	CDS	GEMMAAP_RS04165	WP_026850119.1	L-threonine 3-dehydrogenase	5.43544	0.16625	-0.0427295	0.00061698	-0.191699	-0.273075	-0.0153467	-0.16555	-0.377211	-0.214957	0.540978	0.953828	0.999712	0.558611	0.318983	0.9807	0.305885	0.0285774	0.192682
NZ_CP011454.1	2348490	2349548	-	CDS	GEMMAAP_RS09970	WP_026850680.1	heat-inducible transcriptional repressor HrcA	6.96074	0.165888	-0.14036	-0.198857	-0.0329733	-0.264982	-0.218961	0.256189	-0.15095	0.193819	0.411962	0.758754	0.602649	0.921142	0.197145	0.316864	0.0465574	0.26446	0.128363
NZ_CP011454.1	772604	773803	+	CDS	GEMMAAP_RS03305	WP_026849410.1	PDZ domain-containing protein	9.88556	0.165782	-0.887708	0.0346821	-1.23233	-0.985787	-1.83177	-1.5976	-1.66073	-2.46028	0.897819	0.607117	0.999712	0.216347	0.317506	0.0814719	0.0102769	0.0103235	0.000396489
NZ_CP011454.1	2617269	2618465	-	CDS	GEMMAAP_RS11170	WP_053334139.1	aminotransferase class I/II-fold pyridoxal phosphate-dependent enzyme	7.29308	0.165683	-0.312357	-0.129061	-0.181006	-0.354651	-0.282547	-0.732876	-0.476	-0.816817	0.549768	0.459496	0.866296	0.577712	0.187618	0.326502	0.000107509	0.00813914	3.05e-05
NZ_CP011454.1	2945494	2945907	-	CDS	GEMMAAP_RS12500	WP_026849510.1	hypothetical protein	7.34018	0.165619	-0.297903	-0.0845599	-0.31234	-0.310489	-0.393708	0.326487	0.292913	0.397618	0.717824	0.73864	0.981855	0.517834	0.472426	0.36806	0.190218	0.267056	0.110342
NZ_CP011454.1	3784218	3785396	-	CDS	GEMMAAP_RS15985	WP_026848409.1	hypothetical protein	4.93161	0.165496	0.137786	0.409509	0.109791	0.256244	0.24214	-0.803611	-0.950389	-1.01282	0.724701	0.914728	0.602849	0.864462	0.567284	0.6191	0.00262647	0.00101793	0.000547825
NZ_CP011454.1	618757	618927	-	CDS	GEMMAAP_RS02740	WP_075071395.1	DUF2256 domain-containing protein	2.0011	0.165397	0.421986	0.28058	0.135404	0.296823	0.143862	-0.915514	-1.0238	-0.949121	0.843242	0.73864	0.910928	0.893069	0.671174	0.875011	0.0182735	0.0161731	0.0290048
NZ_CP011454.1	4532012	4532467	+	CDS	GEMMAAP_RS19075	WP_026850998.1	DUF2269 family protein	4.85303	0.164737	-0.178037	-0.383431	0.235468	-0.103954	0.266239	0.355596	0.28377	0.0665729	0.667802	0.846103	0.578933	0.583601	0.818263	0.479139	0.0864391	0.195228	0.767816
NZ_CP011454.1	3189101	3190633	+	CDS	GEMMAAP_RS13500	WP_026848771.1	hypothetical protein	6.7551	0.164233	0.0255725	-0.0351878	0.142428	0.157521	0.129895	1.15416	0.653202	1.10458	0.498307	0.967382	0.992231	0.639654	0.55358	0.659071	2.72e-08	0.000148055	5.4e-08
NZ_CP011454.1	701458	702051	+	CDS	GEMMAAP_RS03025	WP_026849367.1	hypothetical protein	4.61652	0.163999	-0.00365957	0.150862	-0.479067	0.0923696	-0.0527989	1.15938	0.627229	1.41142	0.623655	0.999855	0.884579	0.183905	0.817942	0.918573	5.31e-07	0.00185461	2.95e-08
NZ_CP011454.1	2148287	2149327	-	CDS	GEMMAAP_RS09010	WP_026850815.1	phosphate acyltransferase PlsX	8.86363	0.163397	-0.085892	-0.196462	0.156144	0.33503	0.15316	-0.802268	-0.0779271	-0.85118	0.47434	0.895311	0.638804	0.558879	0.13867	0.572565	4.34e-06	0.622453	1.75e-06
NZ_CP011454.1	2308826	2308996	+	CDS	GEMMAAP_RS20545	WP_158514799.1	hypothetical protein	4.71888	0.162876	-0.183272	-0.311748	-0.634532	-0.534629	-0.534081	-0.00949642	-0.28358	-0.181108	0.654257	0.829225	0.648602	0.103018	0.0963059	0.111499	0.96412	0.184001	0.382809
NZ_CP011454.1	216859	218355	+	CDS	GEMMAAP_RS19905	WP_082820954.1	alpha/beta fold hydrolase	6.57911	0.162698	0.0724145	0.124836	0.0624022	0.133613	0.15209	0.656092	0.408004	0.75884	0.395612	0.895311	0.793794	0.822222	0.534666	0.482817	5.55e-06	0.00200072	6.84e-07
NZ_CP011454.1	686630	687325	+	CDS	GEMMAAP_RS02975	WP_026849361.1	response regulator transcription factor	6.75423	0.1625	0.236932	0.267861	-0.228764	-0.0217721	0.00248983	0.716976	0.021803	0.750539	0.320349	0.306577	0.286366	0.218182	0.945536	0.997094	1.58e-07	0.857219	7.79e-08
NZ_CP011454.1	156955	157449	-	CDS	GEMMAAP_RS00705	WP_158514675.1	type II toxin-antitoxin system VapC family toxin	5.29597	0.161739	0.246264	0.168257	0.565046	0.293636	0.209476	0.959699	0.429541	1.14263	0.627215	0.691261	0.854737	0.0995397	0.351477	0.543806	1.07e-05	0.0282506	9.87e-07
NZ_CP011454.1	4637427	4637747	-	CDS	GEMMAAP_RS19495	WP_145979254.1	type II toxin-antitoxin system RelE/ParE family toxin	5.94824	0.161317	0.159679	0.441528	0.112904	-0.0235019	-0.0506208	1.47741	1.11136	1.65714	0.80864	0.925009	0.683113	0.895439	0.990831	0.960152	7.28e-05	0.00184936	1.99e-05
NZ_CP011454.1	4231151	4231537	-	CDS	GEMMAAP_RS17850	WP_053333537.1	DUF2200 domain-containing protein	3.94362	0.161154	0.320435	0.451741	0.290714	-0.127194	0.225013	0.0850236	-0.00267301	0.485797	0.699951	0.619511	0.510086	0.502125	0.77721	0.590322	0.70048	0.992467	0.0290543
NZ_CP011454.1	1020106	1020969	+	CDS	GEMMAAP_RS04245	WP_026850108.1	NAD(P)-dependent oxidoreductase	6.20568	0.161031	0.0763405	0.0509526	0.0689987	0.30226	0.152276	0.16977	0.0324923	0.260032	0.50277	0.917341	0.982947	0.842946	0.19667	0.588237	0.242511	0.934623	0.0766055
NZ_CP011454.1	4451147	4452028	-	CDS	GEMMAAP_RS18745	WP_158514929.1	glycosyltransferase	5.04773	0.160995	-0.0477894	0.150034	0.175239	0.185947	0.122505	0.966857	0.238036	1.34188	0.72008	0.965706	0.927238	0.736352	0.687388	0.819165	0.000178688	0.344012	2.91e-06
NZ_CP011454.1	2781774	2783189	-	CDS	GEMMAAP_RS11825	WP_043580852.1	S8 family serine peptidase	7.05618	0.160931	0.417873	0.019281	0.278848	0.171071	0.137948	0.654197	0.697247	0.575924	0.611445	0.310188	0.999712	0.402509	0.618787	0.715564	0.000932586	0.000721734	0.00295099
NZ_CP011454.1	4332614	4332871	+	CDS	GEMMAAP_RS18260	WP_043581757.1	GlsB/YeaQ/YmgE family stress response membrane protein	2.89424	0.160919	-0.316771	-0.160199	0.431236	-0.285853	-0.239912	-0.0522687	-0.472159	-0.249979	0.799496	0.782377	0.964366	0.454138	0.615191	0.694931	0.86592	0.138823	0.431918
NZ_CP011454.1	2610591	2611454	-	CDS	GEMMAAP_RS11135	WP_158514827.1	hypothetical protein	6.98859	0.160557	0.106197	0.246404	0.177984	0.265942	0.202147	0.912992	0.577154	1.01199	0.402063	0.835874	0.458282	0.425056	0.169298	0.331963	4.51e-08	5.94e-05	8.31e-09
NZ_CP011454.1	1708388	1710382	-	CDS	GEMMAAP_RS07095	WP_026850406.1	TonB-dependent receptor	7.12244	0.160401	-0.599105	-0.21442	-0.643528	-0.541977	-0.406938	-0.46423	-0.477866	-0.6822	0.655552	0.115997	0.768568	0.0881216	0.0919759	0.225125	0.0255889	0.0269703	0.00184297
NZ_CP011454.1	3528736	3529047	-	CDS	GEMMAAP_RS14890	WP_026848563.1	hypothetical protein	5.85711	0.160177	-0.240248	-0.338778	-0.195258	-0.0357912	-0.369151	1.174	0.627527	1.13058	0.57682	0.644266	0.510086	0.574944	0.945536	0.186155	1.24e-07	0.000767903	2.27e-07
NZ_CP011454.1	3704850	3705032	-	CDS	GEMMAAP_RS15685	WP_026848453.1	Flp family type IVb pilin	8.34961	0.160049	0.0347915	-0.351335	-0.151452	-0.356821	-0.347224	0.739022	0.332972	0.534865	0.712389	0.971468	0.607185	0.764458	0.378142	0.414434	0.00342347	0.186128	0.0276108
NZ_CP011454.1	1807215	1807862	+	CDS	GEMMAAP_RS07525	WP_026850470.1	DUF1707 and DUF2154 domain-containing protein	3.95551	0.160021	-0.257551	-0.685217	-0.841471	-0.381073	-0.552054	-0.880327	-0.740417	-0.615748	0.739309	0.785664	0.342133	0.0889659	0.369937	0.185942	0.00110643	0.00678729	0.0214269
NZ_CP011454.1	388211	388891	+	CDS	GEMMAAP_RS01725	WP_145978945.1	hypothetical protein	7.25203	0.159658	-0.131359	-0.142256	0.0451231	0.211175	-0.0629293	1.34394	1.43777	1.69608	0.705552	0.905829	0.919308	0.9518	0.624972	0.921812	2.81e-06	2.07e-06	9.57e-08
NZ_CP011454.1	2937249	2938400	-	CDS	GEMMAAP_RS12460	WP_043580654.1	P-loop NTPase	6.48304	0.159363	0.0447765	-0.129442	-0.224226	-0.486149	-0.0381488	0.53129	0.140541	0.285317	0.521953	0.947067	0.971133	0.439607	0.0385316	0.931167	0.00101504	0.383477	0.0608898
NZ_CP011454.1	4638182	4638478	-	CDS	GEMMAAP_RS20415	WP_145979255.1	hypothetical protein	3.6605	0.159056	0.273573	0.165693	-0.0395214	-0.0839693	0.162081	0.0851751	0.247408	0.157053	0.775979	0.788098	0.938132	0.969978	0.906526	0.788529	0.759204	0.389389	0.586041
NZ_CP011454.1	1722286	1723158	+	CDS	GEMMAAP_RS07150	WP_026850416.1	acyl-CoA thioesterase II	5.23545	0.15869	0.145645	-0.0103498	-0.121559	0.0282749	0.149677	0.825876	0.60853	0.970424	0.508222	0.788098	0.999712	0.698361	0.94783	0.58868	2.07e-06	0.000206741	2.14e-07
NZ_CP011454.1	2050483	2051778	+	CDS	GEMMAAP_RS08525	WP_026850625.1	UDP-N-acetylglucosamine 1-carboxyvinyltransferase	6.08095	0.158358	0.125211	-0.0477102	-0.31349	0.0376484	-0.181944	-0.68936	-1.28281	-0.877343	0.337571	0.736424	0.964366	0.0995397	0.895986	0.298874	3.48e-07	7.11e-11	1.15e-08
NZ_CP011454.1	1797581	1799248	-	CDS	GEMMAAP_RS07485	WP_026850464.1	S8 family serine peptidase	7.03039	0.158168	-0.495576	-0.307654	-0.366054	-0.590171	-0.573963	-0.67865	-1.28581	-1.22489	0.680483	0.306365	0.638804	0.345974	0.0796701	0.105349	0.00277096	3.9e-06	4.34e-06
NZ_CP011454.1	3532464	3533369	+	CDS	GEMMAAP_RS14920	WP_053333686.1	sulfurtransferase	5.77368	0.158004	0.0456146	0.267532	0.143173	0.0873616	0.0489674	0.319115	0.130447	0.384512	0.53136	0.947067	0.560128	0.650584	0.77721	0.902539	0.0349712	0.417082	0.0134892
NZ_CP011454.1	3953469	3954392	-	CDS	GEMMAAP_RS16685	WP_043579361.1	cysteine synthase CysM	6.69887	0.157968	0.0466333	-0.0316233	0.317168	0.268517	0.131537	1.17266	1.20629	1.28037	0.520466	0.944556	0.992231	0.229766	0.272965	0.656791	2.28e-08	3.04e-08	5.4e-09
NZ_CP011454.1	707372	709285	-	CDS	GEMMAAP_RS03050	WP_053334001.1	DUF1800 domain-containing protein	7.05623	0.157732	-0.105235	-0.157659	-0.560488	-0.161744	-0.416906	-1.7155	-1.63997	-1.77795	0.848212	0.951553	0.971133	0.446661	0.852245	0.577533	0.000226761	0.000534542	0.000183256
NZ_CP011454.1	1631747	1633354	+	CDS	GEMMAAP_RS06775	WP_082821126.1	D-aminoacylase	7.10131	0.157724	-0.0765202	0.035618	0.188086	-0.0127645	0.152912	0.589738	0.350946	0.699246	0.608962	0.935062	0.992231	0.593395	0.991266	0.668791	0.00193015	0.0620591	0.000380949
NZ_CP011454.1	861086	862288	+	CDS	GEMMAAP_RS03650	WP_082821037.1	polysaccharide pyruvyl transferase family protein	8.20008	0.157581	0.283552	0.28896	-0.3205	-0.22404	0.172727	0.454478	0.151681	0.442786	0.841113	0.862947	0.854737	0.66065	0.764588	0.841953	0.220956	0.715486	0.229895
NZ_CP011454.1	1752238	1753293	+	CDS	GEMMAAP_RS07270	WP_145979041.1	hypothetical protein	9.21098	0.157111	-0.492343	-0.262919	-0.0773186	-0.349239	-0.363049	-0.186421	-0.1868	-0.471028	0.548177	0.0843021	0.537139	0.824085	0.168704	0.16333	0.241691	0.266716	0.00453123
NZ_CP011454.1	7874	8833	-	CDS	GEMMAAP_RS00045	WP_053333847.1	serine/threonine protein kinase	9.53132	0.156911	0.156343	0.426429	0.220229	0.0766688	0.334868	0.212478	0.470064	0.604564	0.572286	0.816257	0.251892	0.464765	0.83172	0.223014	0.204684	0.00875049	0.000811149
NZ_CP011454.1	2625654	2626583	-	CDS	GEMMAAP_RS11205	WP_158514828.1	PHB depolymerase family esterase	3.53848	0.156883	-0.200418	-0.230878	-0.400435	-0.708198	-0.587546	-1.04713	-0.517275	-0.955956	0.730288	0.844866	0.847642	0.390822	0.0624634	0.135481	0.000108228	0.0400683	0.000638221
NZ_CP011454.1	3686109	3688010	-	CDS	GEMMAAP_RS15600	WP_026848462.1	hypothetical protein	5.03572	0.156329	-0.1277	0.0148631	0.327372	0.119479	0.177741	0.497054	0.152304	0.47061	0.523645	0.837412	0.999712	0.209538	0.671767	0.501387	0.00120118	0.326089	0.00241285
NZ_CP011454.1	870711	872204	-	CDS	GEMMAAP_RS03685	WP_053334295.1	sigma-54 dependent transcriptional regulator	7.42257	0.156044	0.0765797	0.0529727	-0.0494935	0.00256335	0.00891719	0.613709	0.530306	1.01286	0.700396	0.941504	0.992231	0.939272	0.999236	0.996617	0.00737308	0.0234227	6.35e-05
NZ_CP011454.1	3891876	3892364	-	CDS	GEMMAAP_RS16445	WP_026848334.1	EVE domain-containing protein	5.9232	0.155957	0.26644	-0.0104565	-0.503197	-0.24737	-0.284425	0.84258	0.32259	0.953803	0.553158	0.531075	0.999712	0.0889659	0.351833	0.28307	5.76e-06	0.0480876	1.04e-06
NZ_CP011454.1	907174	907371	+	CDS	GEMMAAP_RS03805	WP_026850177.1	hypothetical protein	8.45399	0.15572	0.119313	-0.305415	-0.0725074	0.106234	-0.170675	-0.457376	-0.242682	-0.564456	0.756461	0.931656	0.718315	0.913886	0.857405	0.763125	0.084859	0.387629	0.0345651
NZ_CP011454.1	2405328	2406305	-	CDS	GEMMAAP_RS10220	WP_026850646.1	NAD-dependent epimerase/dehydratase family protein	7.51357	0.155091	-0.102866	0.00310885	-0.0633571	-0.0519731	-0.0357293	1.19366	0.893103	1.17355	0.433738	0.853751	0.999712	0.877465	0.851595	0.917047	1.15e-09	2.12e-07	1.26e-09
NZ_CP011454.1	3718754	3719251	-	CDS	GEMMAAP_RS15750	WP_026848443.1	hypothetical protein	5.62642	0.154873	0.0907756	-0.153207	0.376069	-0.0332191	0.253327	-0.0648247	0.0326415	-0.0946885	0.598192	0.91699	0.849967	0.221025	0.948666	0.397476	0.712053	0.870985	0.596187
NZ_CP011454.1	2990043	2991254	+	CDS	GEMMAAP_RS12675	WP_075071508.1	M20/M25/M40 family metallo-hydrolase	6.23428	0.154766	0.542262	0.572717	-0.279854	-0.0172127	-0.0393258	1.93271	2.39065	1.836	0.856001	0.652152	0.655281	0.753553	0.996884	0.979342	3.77e-05	5.49e-06	6.82e-05
NZ_CP011454.1	742539	743693	+	CDS	GEMMAAP_RS03215	WP_026849397.1	saccharopine dehydrogenase NADP-binding domain-containing protein	5.79186	0.154761	0.0801433	0.115334	-0.0108706	0.0576861	0.244494	0.164745	-0.0968979	0.15131	0.508214	0.907624	0.872096	0.985588	0.856104	0.306374	0.2407	0.529428	0.288184
NZ_CP011454.1	3970030	3970602	-	CDS	GEMMAAP_RS16755	WP_053333593.1	pyridoxamine 5'-phosphate oxidase family protein	6.0805	0.15438	-0.0603227	0.347221	-0.190089	0.221646	0.152989	1.36213	1.09124	1.53396	0.623655	0.941504	0.512219	0.615308	0.473811	0.668791	3.2e-08	1.9e-06	5.13e-09
NZ_CP011454.1	1346896	1350009	+	CDS	GEMMAAP_RS05630	WP_026849888.1	hypothetical protein	4.54582	0.154193	-0.20045	-0.0993127	0.2296	0.786869	0.149104	0.677689	0.417615	0.261857	0.718336	0.835828	0.971133	0.628903	0.0177005	0.756112	0.00323863	0.0728417	0.250229
NZ_CP011454.1	4612126	4612800	+	CDS	GEMMAAP_RS19400	WP_026848854.1	hypothetical protein	4.4705	0.15403	0.250739	0.128253	0.156023	-0.0744717	0.0552569	0.0925029	0.143125	0.0437448	0.680942	0.717477	0.985589	0.727847	0.874256	0.996617	0.652799	0.511849	0.898851
NZ_CP011454.1	4035681	4037846	-	CDS	GEMMAAP_RS20385	WP_026848250.1	hypothetical protein	6.37156	0.153956	0.142017	0.320326	0.22447	0.325547	0.282396	0.39094	0.17671	0.434392	0.37104	0.691261	0.1947	0.246785	0.0502509	0.107999	0.000729966	0.116335	0.000268894
NZ_CP011454.1	2995998	2996375	-	CDS	GEMMAAP_RS12700	WP_026849477.1	cupin domain-containing protein	5.00804	0.153827	0.263723	-0.223239	-0.396776	-0.266204	-0.402114	0.01111	-0.289638	0.190862	0.646537	0.644266	0.75819	0.259203	0.403213	0.196049	0.955839	0.14212	0.311858
NZ_CP011454.1	2924333	2925610	+	CDS	GEMMAAP_RS12390	WP_026849528.1	phosphoribosylamine--glycine ligase	6.28952	0.153681	0.163461	0.0266949	-0.293921	0.0838013	-0.098585	0.476071	-0.0191968	0.725289	0.58437	0.791958	0.999594	0.338519	0.808867	0.787609	0.00516017	0.923772	9.41e-05
NZ_CP011454.1	591252	591743	+	CDS	GEMMAAP_RS02625	WP_026849313.1	hypothetical protein	6.18741	0.153567	-0.461426	0.0236318	-0.445094	-0.426922	-0.533679	0.239047	0.224212	0.35661	0.676602	0.316391	0.999712	0.233255	0.19495	0.11098	0.235983	0.296403	0.0793309
NZ_CP011454.1	1508809	1509723	+	CDS	GEMMAAP_RS06215	WP_053334324.1	PD40 domain-containing protein	4.10719	0.153424	0.0459652	0.284172	-0.444098	-0.00485646	-0.20136	0.914599	0.537174	0.741036	0.639836	0.955093	0.647749	0.202117	0.999236	0.555228	9.71e-06	0.00484551	0.000201689
NZ_CP011454.1	1056507	1057394	+	CDS	GEMMAAP_RS04420	WP_012682199.1	RNA polymerase sigma factor RpoD/SigA	8.96397	0.153332	-0.259785	-0.144304	-0.556973	-0.437471	-0.400188	-1.39937	-1.02571	-1.71343	0.664964	0.702746	0.87489	0.105398	0.174694	0.225125	2.09e-07	2.92e-05	8.76e-09
NZ_CP011454.1	1333435	1335762	+	CDS	GEMMAAP_RS05580	WP_082821089.1	TonB-dependent receptor	4.37305	0.153248	-0.167751	0.120283	0.101644	-0.184179	-0.181318	-0.921836	-0.721456	-1.12266	0.578008	0.782377	0.992231	0.913211	0.520561	0.543806	3.55e-06	0.000159872	5.21e-07
NZ_CP011454.1	959191	960345	-	CDS	GEMMAAP_RS04000	WP_026850149.1	tRNA guanosine(34) transglycosylase Tgt	6.33541	0.153224	-0.0542179	-0.0610671	-0.100155	0.000377343	-0.16092	0.41599	0.0419159	0.671473	0.432499	0.931656	0.951581	0.699329	0.999236	0.462852	0.00127722	0.761596	4.81e-06
NZ_CP011454.1	2295288	2295695	-	CDS	GEMMAAP_RS09715	WP_026850718.1	energy transducer TonB	6.19267	0.153218	0.213719	-0.184747	-0.178356	-0.315153	-0.320815	-0.363297	-0.801837	-0.575042	0.732344	0.829247	0.878552	0.732163	0.43971	0.456072	0.129208	0.00265501	0.0209418
NZ_CP011454.1	3962480	3965836	-	CDS	GEMMAAP_RS16730	WP_026848293.1	amidohydrolase family protein	6.00068	0.153171	0.122123	0.16945	0.34891	0.351123	0.347287	0.0680811	0.616265	0.117275	0.486269	0.829225	0.726682	0.152294	0.0936117	0.11098	0.618179	8.49e-05	0.389513
NZ_CP011454.1	215508	215765	+	CDS	GEMMAAP_RS00940	WP_026849058.1	hypothetical protein	4.05726	0.153115	0.331538	0.0238876	0.0176397	0.0403322	0.216275	0.364553	0.244449	0.502367	0.562822	0.342415	0.999712	0.976916	0.927534	0.425384	0.0171065	0.124547	0.00217346
NZ_CP011454.1	1611536	1612216	-	CDS	GEMMAAP_RS06695	WP_145979281.1	ABC transporter ATP-binding protein	7.76351	0.152555	-0.376819	-0.241355	-0.490226	-0.398472	-0.730695	-0.862568	-0.393965	-1.21612	0.79352	0.704858	0.847642	0.353031	0.426246	0.127877	0.00556574	0.203425	0.00029349
NZ_CP011454.1	3920713	3921975	+	CDS	GEMMAAP_RS16560	WP_026848315.1	glucose-1-phosphate adenylyltransferase	6.71679	0.152529	-0.0768277	-0.105656	-0.143929	0.00581636	-0.0135807	1.29388	0.888468	1.07833	0.601917	0.931656	0.920901	0.680273	0.998476	0.987018	4.09e-08	1.9e-05	6.56e-07
NZ_CP011454.1	4460712	4463405	+	CDS	GEMMAAP_RS18785	WP_053334596.1	serine/threonine-protein kinase	7.0175	0.152402	0.0346025	0.219738	0.384486	0.250945	0.384141	0.72179	0.518116	1.01598	0.546991	0.959814	0.637593	0.151244	0.327589	0.123206	3.92e-05	0.00195996	2.94e-07
NZ_CP011454.1	2327650	2328021	-	CDS	GEMMAAP_RS09855	WP_026850699.1	50S ribosomal protein L20	8.53032	0.152047	-0.054514	0.177354	-0.184688	0.195517	-0.00898412	-0.620933	0.169079	-0.73381	0.63814	0.947784	0.795649	0.609708	0.557708	0.996448	0.0017881	0.3951	0.000352206
NZ_CP011454.1	3096082	3097524	+	CDS	GEMMAAP_RS13125	WP_026848827.1	MBL fold metallo-hydrolase	7.62889	0.151924	0.0490964	0.0672491	0.229047	0.180134	0.102368	0.606556	0.0335733	0.221315	0.381287	0.931656	0.916818	0.229766	0.327988	0.635014	5.14e-06	0.791606	0.0456146
NZ_CP011454.1	1641018	1642388	+	CDS	GEMMAAP_RS06805	WP_026850361.1	sigma-54 dependent transcriptional regulator	7.01632	0.1519	-0.398021	-0.186602	-0.213562	-0.497709	-0.582689	-0.556015	-0.771113	-1.07747	0.597903	0.295323	0.749974	0.514922	0.059854	0.0495021	0.00201537	0.000114808	8.16e-07
NZ_CP011454.1	4120899	4121678	-	CDS	GEMMAAP_RS17375	WP_053333559.1	DUF2490 domain-containing protein	5.19551	0.151555	0.238649	0.333851	-0.216551	0.0682406	-0.0128838	1.30008	0.714494	1.60416	0.623172	0.661356	0.520154	0.546344	0.881273	0.989226	3.14e-08	0.000252864	1.17e-09
NZ_CP011454.1	3091409	3091786	-	CDS	GEMMAAP_RS13105	WP_026848831.1	hypothetical protein	7.36716	0.151387	0.226209	0.139663	-0.078956	0.193653	0.221395	-0.764505	-0.860661	-1.04006	0.623172	0.707716	0.861584	0.848353	0.546404	0.494285	0.000144985	6.05e-05	2.97e-06
NZ_CP011454.1	1762002	1762751	+	CDS	GEMMAAP_RS07325	WP_026850443.1	Bax inhibitor-1/YccA family protein	8.1327	0.150919	-0.30901	-0.25619	-0.352594	-0.3875	-0.332849	0.0742648	-0.403892	-0.453687	0.664826	0.593122	0.663268	0.308638	0.226816	0.327023	0.71608	0.0518378	0.023859
NZ_CP011454.1	2921738	2922907	+	CDS	GEMMAAP_RS12380	WP_043580656.1	PLP-dependent aspartate aminotransferase family protein	6.25214	0.150529	0.275075	0.0894471	0.0634477	0.106248	0.343242	0.520429	0.340603	0.572146	0.586775	0.531075	0.938828	0.877775	0.741879	0.195197	0.00219072	0.0445035	0.00102793
NZ_CP011454.1	4021195	4022541	+	CDS	GEMMAAP_RS16950	WP_026848259.1	TonB-dependent receptor	6.85989	0.150371	0.131268	0.098819	0.484767	0.390633	0.49272	0.469478	0.281976	0.341225	0.416918	0.748542	0.849967	0.0198888	0.0268595	0.0210458	0.00025446	0.0222133	0.00508028
NZ_CP011454.1	3735900	3737261	-	CDS	GEMMAAP_RS15810	WP_026848434.1	HEAT repeat domain-containing protein	6.73576	0.149247	-0.02587	-0.332233	-0.418225	-0.254136	-0.28778	0.226957	0.169265	0.225224	0.530439	0.965706	0.367179	0.108615	0.292956	0.225187	0.115806	0.266716	0.118199
NZ_CP011454.1	3946239	3947477	-	CDS	GEMMAAP_RS16665	WP_026848303.1	hypothetical protein	5.29854	0.149209	-0.189985	0.029808	-0.190154	0.160497	-0.0610878	0.983156	0.727022	0.763988	0.604241	0.74417	0.996605	0.577712	0.599022	0.888193	1.27e-06	0.00013196	5.19e-05
NZ_CP011454.1	291557	291835	+	CDS	GEMMAAP_RS01295	WP_053333913.1	oxidative damage protection protein	5.52756	0.148833	0.225056	0.114049	0.518051	0.674745	0.654924	0.717894	0.965948	0.889991	0.558054	0.614907	0.894615	0.0642966	0.00158421	0.0189746	2.62e-05	7.54e-07	1.52e-06
NZ_CP011454.1	4196283	4197173	-	CDS	GEMMAAP_RS17705	WP_026848156.1	dienelactone hydrolase family protein	5.56659	0.148771	0.330612	0.611572	-0.0573935	0.2809	-0.110747	1.74794	1.55573	1.82034	0.702416	0.569171	0.204163	0.920198	0.419314	0.812596	4.39e-09	5.85e-08	2.39e-09
NZ_CP011454.1	2028130	2028675	-	CDS	GEMMAAP_RS08410	WP_026850607.1	hypothetical protein	3.90135	0.148682	0.286734	0.416725	-0.345646	-0.164085	-0.0939761	-0.0437918	-0.24498	0.485769	0.667802	0.600456	0.46298	0.352594	0.647607	0.828298	0.829126	0.220325	0.0123609
NZ_CP011454.1	4540495	4541658	+	CDS	GEMMAAP_RS19130	WP_053334618.1	UvrB/UvrC motif-containing protein	4.95614	0.14866	-0.096396	-0.0544992	0.106003	0.003455	0.0884335	0.832101	0.612717	1.04153	0.507823	0.871495	0.999712	0.720186	0.999236	0.756342	6.28e-07	8.37e-05	2.27e-08
NZ_CP011454.1	3340395	3340907	+	CDS	GEMMAAP_RS14170	WP_026848668.1	hypothetical protein	7.22598	0.148468	-1.26724	-0.0117334	-0.942162	-1.32956	-0.826303	1.76242	1.51959	1.54212	0.9026	0.316391	0.999712	0.372002	0.135744	0.395099	0.00307068	0.0108047	0.00768834
NZ_CP011454.1	2147298	2148290	-	CDS	GEMMAAP_RS09005	WP_026850816.1	ketoacyl-ACP synthase III	7.14225	0.148457	0.0766334	0.0040865	-0.103903	0.240884	0.0388688	-0.456783	0.32006	-0.369342	0.386509	0.871668	0.999712	0.638393	0.162129	0.889774	0.000162	0.00607201	0.00151592
NZ_CP011454.1	3486128	3486988	-	CDS	GEMMAAP_RS14745	WP_026848581.1	zinc metallopeptidase	5.05678	0.148352	0.260495	0.270994	0.277359	-0.0759598	0.253118	-0.0828282	-0.189744	0.0223046	0.484348	0.38868	0.475624	0.233255	0.772262	0.225536	0.521909	0.160271	0.905119
NZ_CP011454.1	376135	377514	-	CDS	GEMMAAP_RS01655	WP_053333930.1	cytochrome c	6.514	0.148054	0.234219	0.0620251	0.0285987	-0.177268	0.184653	1.59007	1.51455	1.60156	0.657294	0.710252	0.985589	0.966331	0.613412	0.611492	6.26e-09	2.88e-08	5.4e-09
NZ_CP011454.1	3714152	3714544	-	CDS	GEMMAAP_RS15730	WP_043579399.1	S-adenosylmethionine decarboxylase	5.8959	0.148033	-0.00715465	0.0300232	-0.37683	-0.228805	-0.297495	-0.0879802	-0.197735	-0.647181	0.739309	0.999855	0.999712	0.404148	0.596414	0.482205	0.714474	0.430004	0.0096239
NZ_CP011454.1	1194504	1197395	+	CDS	GEMMAAP_RS04935	WP_158514740.1	DNA/RNA non-specific endonuclease	5.46126	0.147194	0.189858	0.227547	0.140434	-0.0749752	0.132589	-0.687081	-0.546286	-0.72832	0.552526	0.701532	0.630888	0.650584	0.808867	0.647846	5.04e-05	0.000983482	3.69e-05
NZ_CP011454.1	33885	34961	-	CDS	GEMMAAP_RS00145	WP_053333853.1	ABC transporter permease	5.42409	0.146159	-0.387031	-0.144857	0.356775	0.210567	0.0473341	-0.907667	-0.739205	-1.24532	0.623172	0.316072	0.86309	0.245724	0.470994	0.918618	9.24e-06	0.000206741	1.84e-07
NZ_CP011454.1	3283708	3286803	-	CDS	GEMMAAP_RS13920	WP_026848704.1	CusA/CzcA family heavy metal efflux RND transporter	5.63488	0.146142	0.0533426	-0.144339	0.208517	0.216496	0.116375	-0.752064	-0.514751	-0.751936	0.555329	0.941504	0.831733	0.463976	0.383701	0.695094	1.76e-05	0.00178855	2.63e-05
NZ_CP011454.1	3178848	3179810	-	CDS	GEMMAAP_RS13440	WP_053333764.1	hydroxymethylbilane synthase	6.64362	0.145312	0.0802333	0.0722925	-0.00612275	0.216053	0.122372	-0.121813	-0.523549	-0.0336728	0.519238	0.902494	0.966864	0.993088	0.351008	0.654086	0.377896	0.00073321	0.819992
NZ_CP011454.1	4576716	4577183	-	CDS	GEMMAAP_RS19275	WP_026851027.1	hypothetical protein	5.04645	0.144946	-0.235999	-0.177097	0.0414978	-0.10722	-0.0365789	0.369868	0.227191	0.764071	0.705523	0.741989	0.865357	0.951126	0.802639	0.952645	0.0663781	0.290343	0.000540534
NZ_CP011454.1	4655128	4655937	-	CDS	GEMMAAP_RS19590	WP_026848883.1	agmatinase	5.31567	0.144581	-0.458566	-0.136913	-0.0042063	-0.463509	-0.359667	0.583009	-0.0917427	0.242713	0.721625	0.3701	0.927238	0.999455	0.187618	0.342601	0.00793713	0.705542	0.262806
NZ_CP011454.1	4333880	4334671	-	CDS	GEMMAAP_RS18270	WP_026850882.1	SDR family oxidoreductase	7.74294	0.144571	0.0191756	-0.0763431	0.223682	0.162861	0.284435	0.893717	0.788516	0.94828	0.485295	0.971468	0.919308	0.327833	0.461088	0.177583	1.7e-07	2.07e-06	6.22e-08
NZ_CP011454.1	3258398	3259708	+	CDS	GEMMAAP_RS13790	WP_075071528.1	amidohydrolase family protein	5.10142	0.144321	0.0242432	-0.184675	0.261241	0.082634	0.15948	0.787265	0.502681	0.648521	0.600685	0.971468	0.927238	0.379164	0.850793	0.604748	1.56e-05	0.00311248	0.000218012
NZ_CP011454.1	3656785	3658008	+	CDS	GEMMAAP_RS15470	WP_026848481.1	cysteine desulfurase	6.95875	0.143762	-0.0319504	0.230473	0.588823	-0.863173	0.464426	-1.28013	-2.41336	-2.68427	0.833032	0.986041	0.884958	0.304978	0.0960163	0.41817	0.000525012	8.56e-07	1.46e-07
NZ_CP011454.1	1739747	1740157	-	CDS	GEMMAAP_RS07225	WP_026850429.1	methylmalonyl-CoA epimerase	4.09291	0.143661	-0.0551356	-0.126982	-0.394287	-0.237491	-0.183724	0.167441	-0.248534	0.0401703	0.652371	0.944556	0.947959	0.242049	0.431101	0.589066	0.329418	0.179528	0.833958
NZ_CP011454.1	4437134	4437670	+	CDS	GEMMAAP_RS18690	WP_026850942.1	Rieske 2Fe-2S domain-containing protein	5.60633	0.143327	0.208311	-0.0806811	-0.034812	-0.253665	-0.0991627	1.07199	1.34004	1.47106	0.652075	0.73864	0.981429	0.954441	0.396443	0.799517	8.28e-07	5.62e-08	6.64e-09
NZ_CP011454.1	4473701	4474303	+	CDS	GEMMAAP_RS18830	WP_053334598.1	CDP-alcohol phosphatidyltransferase family protein	4.08278	0.143314	0.181044	0.414549	0.21563	-0.116015	0.0879249	0.27006	0.436556	0.328504	0.699951	0.821022	0.489359	0.594447	0.773101	0.92752	0.157175	0.0312022	0.0964083
NZ_CP011454.1	202257	203267	+	CDS	GEMMAAP_RS00890	WP_145978931.1	hypothetical protein	5.24913	0.143304	0.0531727	0.0607407	0.415687	0.391177	0.450033	0.0147392	0.464149	0.214343	0.591051	0.941504	0.980694	0.137899	0.101761	0.0847679	0.987253	0.00481178	0.167275
NZ_CP011454.1	1682388	1683179	-	CDS	GEMMAAP_RS06985	WP_026850390.1	DUF3108 domain-containing protein	8.13507	0.143139	-0.830441	-0.436263	0.127469	-0.484749	-0.514456	-0.942096	-0.911707	-1.38263	0.711867	0.0153651	0.429471	0.775463	0.156277	0.139938	0.000105785	0.000238172	6.32e-07
NZ_CP011454.1	4701866	4702210	-	CDS	GEMMAAP_RS19820	WP_053334023.1	metalloregulator ArsR/SmtB family transcription factor	6.22824	0.142916	-0.261617	0.0600678	0.302519	-0.0731834	0.223233	0.365172	-0.0733656	0.628899	0.620145	0.591444	0.981429	0.310781	0.840438	0.452101	0.0284244	0.69263	0.000484554
NZ_CP011454.1	2519778	2520656	-	CDS	GEMMAAP_RS10740	WP_026849769.1	sulfite exporter TauE/SafE family protein	6.18466	0.142789	0.128839	-0.0483157	-0.382389	-0.2094	-0.254085	-0.581895	-0.386741	-0.842586	0.644566	0.864314	0.992231	0.235836	0.496151	0.414098	0.00179287	0.036622	4.76e-05
NZ_CP011454.1	3281860	3282300	+	CDS	GEMMAAP_RS13900	WP_026848707.1	hypothetical protein	2.47247	0.142687	0.406967	0.0870754	0.20932	0.797446	-0.273804	0.791286	0.480393	0.659048	0.844839	0.694434	0.992231	0.774955	0.0927952	0.67656	0.00881714	0.133129	0.0398575
NZ_CP011454.1	3357527	3358675	-	CDS	GEMMAAP_RS14250	WP_202969141.1	chromate efflux transporter	6.50741	0.142683	0.0308501	0.159333	0.4847	0.220978	0.303968	1.21281	0.941421	1.40371	0.70828	0.971468	0.881202	0.184304	0.549914	0.402861	1.78e-06	9.22e-05	1.99e-07
NZ_CP011454.1	2285512	2286246	-	CDS	GEMMAAP_RS09665	WP_026850724.1	UMP kinase	7.2565	0.142548	0.0275135	-0.0191637	0.36304	0.444918	0.304165	-0.197946	0.0757499	-0.583466	0.476398	0.962747	0.999594	0.0981721	0.0167944	0.129691	0.113578	0.581175	5.13e-05
NZ_CP011454.1	1764098	1766428	-	CDS	GEMMAAP_RS07335	WP_158514766.1	DUF2723 domain-containing protein	8.54942	0.141923	0.0121248	0.0638985	0.226203	0.119303	0.0621144	0.971089	0.643417	0.929907	0.593949	0.991568	0.966226	0.419124	0.697628	0.874917	1.13e-06	0.000347351	1.91e-06
NZ_CP011454.1	2724195	2725886	+	CDS	GEMMAAP_RS11605	WP_043580694.1	M28 family metallopeptidase	5.45433	0.141918	0.0750571	0.0810575	-0.00882922	-0.175112	0.0152573	-0.113991	-0.126155	-0.175605	0.555329	0.917341	0.938132	0.990241	0.484173	0.978389	0.42797	0.408548	0.227634
NZ_CP011454.1	4592239	4593606	-	CDS	GEMMAAP_RS19325	WP_026851035.1	type VI secretion system baseplate subunit TssK	6.26111	0.141905	0.140033	-0.0258978	-0.106078	-0.169109	0.0471157	1.01515	0.917247	1.08605	0.427448	0.70846	0.992231	0.650919	0.369254	0.883031	1.77e-09	1.88e-08	5.47e-10
NZ_CP011454.1	2408135	2408644	-	CDS	GEMMAAP_RS10230	WP_053334464.1	single-stranded DNA-binding protein	6.67008	0.141737	0.213636	0.176967	-0.019987	0.164057	0.0209008	0.441058	0.33208	0.61469	0.621048	0.701886	0.768568	0.9753	0.585505	0.969455	0.00931542	0.0551455	0.000612667
NZ_CP011454.1	2513667	2514641	+	CDS	GEMMAAP_RS10715	WP_026849772.1	ABC transporter permease	5.30493	0.14166	0.203802	0.213256	0.382116	-0.07957	0.245738	0.299663	-0.309425	0.405956	0.675692	0.758158	0.768568	0.259203	0.846672	0.457517	0.10188	0.113005	0.0310735
NZ_CP011454.1	1175730	1176281	-	CDS	GEMMAAP_RS04855	WP_158514739.1	hypothetical protein	8.36272	0.141073	-0.00267671	-0.0194028	-0.0399371	-0.160589	-0.126792	1.05698	0.850561	1.25862	0.605844	0.999855	0.999712	0.922845	0.583109	0.694931	4.33e-07	1.72e-05	2.62e-08
NZ_CP011454.1	3793197	3793910	-	CDS	GEMMAAP_RS16025	WP_145979178.1	hypothetical protein	5.12272	0.140851	0.155939	0.120733	0.430819	0.654543	0.218124	-0.205135	0.0723387	-0.230353	0.678123	0.840602	0.920957	0.184961	0.0162712	0.513828	0.261862	0.72673	0.222412
NZ_CP011454.1	377684	378292	+	CDS	GEMMAAP_RS01660	WP_053333931.1	histidine phosphatase family protein	5.36776	0.140478	-0.14019	-0.177475	0.00625461	0.0426184	-0.00163654	0.706999	0.635589	0.84884	0.690293	0.864314	0.849967	0.995281	0.940139	0.998911	0.000468872	0.00195996	7.05e-05
NZ_CP011454.1	1854675	1855874	+	CDS	GEMMAAP_RS07670	WP_026850494.1	glycosyltransferase	7.82731	0.140449	0.0562631	0.120359	-0.0267947	0.163604	0.161663	-1.12975	-1.10791	-1.30529	0.489219	0.931656	0.999712	0.941197	0.448664	0.476894	3.58e-09	1.08e-08	3.36e-10
NZ_CP011454.1	3460645	3462792	-	CDS	GEMMAAP_RS14665	WP_053333699.1	serine/threonine protein kinase	8.80316	0.139868	-0.0385668	0.00713259	0.0525053	-0.147934	-0.00126216	0.216819	0.328398	0.22863	0.520466	0.947784	0.999712	0.870388	0.536858	0.998911	0.107369	0.0207878	0.0869538
NZ_CP011454.1	910692	911180	-	CDS	GEMMAAP_RS03820	WP_026850174.1	hypothetical protein	5.25066	0.139499	0.344451	-0.0601251	-0.0725225	0.0556978	-0.00416956	0.850571	0.851322	0.822781	0.71226	0.531075	0.992231	0.895878	0.921151	0.997347	0.000125966	0.000209307	0.000232616
NZ_CP011454.1	57488	57895	+	CDS	GEMMAAP_RS00255	WP_158514665.1	hypothetical protein	5.70548	0.139428	0.176581	0.146306	0.234064	0.0281126	0.103335	0.842184	0.544724	1.01729	0.558553	0.715672	0.803536	0.376429	0.947704	0.724538	1.28e-06	0.000549351	8.26e-08
NZ_CP011454.1	3372652	3374337	-	CDS	GEMMAAP_RS14305	WP_145979155.1	CocE/NonD family hydrolase	5.21636	0.139283	-0.275187	-0.0710291	-0.366436	-0.292539	-0.489685	-0.570388	-0.594824	-0.776575	0.707389	0.666743	0.984453	0.333249	0.386625	0.135068	0.00593649	0.00620138	0.000578792
NZ_CP011454.1	3932738	3933079	-	CDS	GEMMAAP_RS16620	WP_145979197.1	hypothetical protein	3.51977	0.139163	-0.79915	-1.18374	-0.34105	5.02644	-0.809356	-0.481287	-0.275438	-0.901783	0.950152	0.838729	0.839127	0.889948	1.47e-05	0.657317	0.570947	0.776891	0.369479
NZ_CP011454.1	3282563	3282868	-	CDS	GEMMAAP_RS13910	WP_145979148.1	hypothetical protein	4.20231	0.139127	0.227981	-0.290152	0.000612819	-0.0287006	0.00314499	-0.584274	-0.403839	-0.789073	0.775979	0.809262	0.768568	0.999704	0.977661	0.998911	0.0174243	0.111359	0.00354286
NZ_CP011454.1	3889093	3890670	-	CDS	GEMMAAP_RS16435	WP_026848336.1	Na+/H+ antiporter	6.37503	0.13891	0.0347628	0.338609	0.0351709	0.0749989	0.0896349	0.923574	0.695483	0.858343	0.507194	0.951553	0.286366	0.918764	0.772219	0.738499	7.08e-08	9.31e-06	2.27e-07
NZ_CP011454.1	3903642	3904682	+	CDS	GEMMAAP_RS16495	WP_053333611.1	class 1 fructose-bisphosphatase	4.84772	0.138804	-0.14707	-0.048113	0.0401828	-0.031553	0.00289874	0.4526	0.0769857	0.2718	0.654257	0.840276	0.999712	0.939498	0.951539	0.998911	0.00900216	0.687894	0.115209
NZ_CP011454.1	1998350	1999309	+	CDS	GEMMAAP_RS08285	WP_026850589.1	aspartate carbamoyltransferase catalytic subunit	5.87472	0.138403	0.203292	-0.0537676	-0.241868	0.0861075	0.0136702	0.249989	-0.336594	0.298395	0.55811	0.63755	0.999712	0.369922	0.76281	0.98032	0.0753543	0.0248857	0.0372144
NZ_CP011454.1	2432079	2433434	-	CDS	GEMMAAP_RS10315	WP_026849830.1	nucleotide sugar dehydrogenase	9.71205	0.138276	-0.597671	-0.3176	-0.580399	-0.617432	-0.829568	-1.96368	-1.91132	-2.51199	0.789077	0.308869	0.690364	0.182476	0.135744	0.0657285	8.41e-08	2.45e-07	1.93e-09
NZ_CP011454.1	1623623	1625209	-	CDS	GEMMAAP_RS06730	WP_053334346.1	sodium/solute symporter	5.94053	0.137762	-0.0880532	0.0100708	-7.03e-06	-0.253417	-0.0382056	0.327266	0.315574	0.29024	0.69742	0.929364	0.999712	0.999974	0.434736	0.947637	0.0820888	0.108778	0.126252
NZ_CP011454.1	2852234	2852758	+	CDS	GEMMAAP_RS12100	WP_026849570.1	hypothetical protein	4.91692	0.137143	0.137182	0.506836	-0.215587	-0.32308	0.094892	0.311699	-0.0229869	0.229168	0.866089	0.941504	0.692218	0.802137	0.645344	0.928544	0.38976	0.961157	0.544345
NZ_CP011454.1	2802643	2804370	-	CDS	GEMMAAP_RS11905	WP_082821268.1	D-aminoacylase	6.88877	0.137128	-0.133115	0.0472788	0.131877	-0.081856	0.115517	-0.0201136	-0.0379414	-0.0220158	0.523645	0.788098	0.980694	0.614552	0.755871	0.657553	0.886729	0.80267	0.875898
NZ_CP011454.1	4096007	4096798	-	CDS	GEMMAAP_RS17275	WP_043579336.1	enoyl-CoA hydratase/isomerase family protein	5.17964	0.136856	0.101462	0.334836	0.145094	-0.0116804	2.98e-05	0.474316	0.298689	0.495531	0.623655	0.892442	0.469602	0.670933	0.999236	0.999835	0.00344855	0.0683507	0.00289985
NZ_CP011454.1	266826	267134	+	CDS	GEMMAAP_RS01165	WP_145978935.1	hypothetical protein	3.89567	0.136819	-0.235234	-0.133525	-0.0256866	-0.161234	0.0263122	-1.47558	-1.98512	-1.47444	0.790128	0.820361	0.953489	0.980351	0.744088	0.978389	3.78e-06	2.34e-07	1.17e-05
NZ_CP011454.1	1433956	1435272	-	CDS	GEMMAAP_RS05930	WP_026849839.1	amino acid permease	6.74945	0.136367	0.16688	0.101821	-0.0763045	-0.07761	0.0091794	-0.000480632	0.143168	-0.358103	0.597903	0.758158	0.98462	0.824629	0.808403	0.994055	0.997718	0.376125	0.0218704
NZ_CP011454.1	946535	947509	+	CDS	GEMMAAP_RS03930	WP_158514724.1	DMT family transporter	5.87318	0.136349	0.0313716	0.103798	0.0708414	-0.0137898	0.0344179	-0.321636	-0.627127	-0.436963	0.558424	0.959814	0.981429	0.827185	0.999236	0.932357	0.0229754	0.000135467	0.00350333
NZ_CP011454.1	388909	389349	-	CDS	GEMMAAP_RS01730	WP_202969180.1	DUF5519 family protein	7.05817	0.136119	-0.13511	-0.0201067	0.781686	0.579832	0.585622	0.272096	0.691552	0.538005	0.585275	0.828539	0.999712	0.00386185	0.00800754	0.0267875	0.0661148	7.15e-05	0.000739568
NZ_CP011454.1	4445456	4446730	+	CDS	GEMMAAP_RS18720	WP_026850947.1	hypothetical protein	3.50006	0.136024	0.278692	0.0414443	-0.0873435	-0.409772	-0.400507	-0.0883613	-0.743096	-0.245351	0.829906	0.791958	0.999712	0.913886	0.404544	0.442276	0.76035	0.0174143	0.412702
NZ_CP011454.1	3778876	3780756	-	CDS	GEMMAAP_RS15965	WP_026848412.1	Na+:solute symporter	5.56083	0.135984	0.158706	0.354077	0.0688708	0.163563	0.273196	0.0935517	-0.283154	0.122576	0.540025	0.736424	0.286366	0.824138	0.472426	0.201874	0.480358	0.0420107	0.359644
NZ_CP011454.1	727227	728099	-	CDS	GEMMAAP_RS20760	WP_053334005.1	hypothetical protein	7.772	0.135856	0.139183	-0.129397	-0.165636	0.0381514	-0.0917965	0.286451	0.040904	0.443722	0.686284	0.864314	0.886205	0.656015	0.945536	0.828975	0.124977	0.85229	0.0193013
NZ_CP011454.1	3770596	3771603	+	CDS	GEMMAAP_RS15940	WP_026848415.1	MoxR family ATPase	5.43913	0.135762	-0.144324	-0.344644	-0.00836689	-0.144307	-0.391016	-0.326668	-0.175383	-0.691534	0.771535	0.895311	0.663258	0.994121	0.757992	0.337389	0.160704	0.485347	0.00630433
NZ_CP011454.1	3091922	3092977	+	CDS	GEMMAAP_RS13110	WP_043579527.1	hypothetical protein	5.48989	0.13572	0.134976	0.210235	-0.285707	-0.0759928	-0.326354	0.781291	0.523564	1.00796	0.637523	0.846601	0.718315	0.357695	0.827918	0.224256	2.33e-05	0.00266702	6.98e-07
NZ_CP011454.1	3037571	3037999	-	CDS	GEMMAAP_RS12855	WP_026849456.1	DUF494 family protein	6.68716	0.135614	-0.212268	0.0719768	0.0787581	-0.1058	-0.0238678	-0.0721353	-0.0257678	-0.0271726	0.490522	0.513722	0.924105	0.764458	0.64546	0.948499	0.559968	0.85667	0.969463
NZ_CP011454.1	233303	234346	-	CDS	GEMMAAP_RS01015	WP_026849071.1	hypothetical protein	5.54629	0.135582	0.233717	0.0466458	0.11752	-0.00777491	0.022948	0.44492	0.501812	0.601461	0.608483	0.595377	0.98992	0.722617	0.996447	0.960753	0.00419888	0.00221992	0.000298801
NZ_CP011454.1	2631158	2632177	-	CDS	GEMMAAP_RS11220	WP_202969118.1	ketoacyl-ACP synthase III	2.96355	0.135379	0.0650425	0.167258	-0.229034	-0.0137925	0.15878	-0.289593	0.35733	-0.0444999	0.82212	0.959768	0.938761	0.715077	0.996447	0.792208	0.281867	0.201999	0.883624
NZ_CP011454.1	1081512	1083272	+	CDS	GEMMAAP_RS04505	WP_026850074.1	hypothetical protein	7.68543	0.135155	-0.417661	0.0516845	-0.175927	-0.565542	-0.471137	-0.521537	-1.0588	-0.978214	0.82717	0.64461	0.993197	0.780831	0.242531	0.36006	0.0801955	0.00159896	0.00225359
NZ_CP011454.1	3809632	3810801	-	CDS	GEMMAAP_RS16100	WP_026848389.1	aminotransferase class I/II-fold pyridoxal phosphate-dependent enzyme	4.99859	0.135043	0.353588	-0.091316	-0.237863	-0.171495	0.177524	0.0588982	-0.326113	-0.0483317	0.73845	0.538762	0.971133	0.590659	0.676055	0.673832	0.787189	0.143323	0.834191
NZ_CP011454.1	990115	991506	-	CDS	GEMMAAP_RS04125	WP_026850127.1	sigma-54 dependent transcriptional regulator	7.63511	0.134397	-0.287299	-0.292485	-0.113921	-0.179656	-0.418561	0.490041	0.961917	0.573927	0.80178	0.769129	0.749549	0.857845	0.732593	0.367198	0.0671324	0.00128778	0.0328936
NZ_CP011454.1	3020670	3022235	+	CDS	GEMMAAP_RS12805	WP_202969130.1	MFS transporter	4.44088	0.134261	-0.139212	-0.0786475	0.113781	-0.072415	-0.0341196	-0.128612	-0.0421406	-0.349399	0.631571	0.829225	0.964366	0.736425	0.825949	0.940581	0.396334	0.810605	0.0292995
NZ_CP011454.1	2663017	2664813	+	CDS	GEMMAAP_RS11350	WP_026849683.1	translation elongation factor 4	7.99853	0.133761	-0.0810698	0.0406201	0.0426391	0.183031	0.0735047	-0.766111	0.17824	-0.527381	0.470113	0.874895	0.980694	0.881142	0.350607	0.770823	3.89e-07	0.142554	6.74e-05
NZ_CP011454.1	3661167	3661709	+	CDS	GEMMAAP_RS15490	WP_043579416.1	VTT domain-containing protein	2.77585	0.133722	-0.149627	-0.237556	0.197369	-0.0273945	-0.159589	-0.854003	-1.14161	-0.556681	0.82717	0.91699	0.887446	0.751044	0.982395	0.796828	0.00368909	0.000666582	0.0630434
NZ_CP011454.1	889045	890115	+	CDS	GEMMAAP_RS03740	WP_043581099.1	dTDP-glucose 4%2C6-dehydratase	4.15405	0.133481	0.268052	0.123684	0.0704201	0.0100021	0.0845247	0.933863	0.823861	1.3082	0.869543	0.64064	0.927238	0.889948	0.999236	0.852621	1.26e-05	0.000115596	1.08e-07
NZ_CP011454.1	1486273	1487988	+	CDS	GEMMAAP_RS06120	WP_053334320.1	M28 family peptidase	5.70501	0.13344	0.0723439	0.00795871	0.0161961	0.223669	-0.113612	-0.298344	-0.542682	-0.503881	0.583751	0.921497	0.999712	0.999704	0.351059	0.691432	0.0381082	0.000768463	0.00132819
NZ_CP011454.1	819496	820800	-	CDS	GEMMAAP_RS03490	WP_026850224.1	UDP-glucose/GDP-mannose dehydrogenase family protein	8.16561	0.133043	0.159585	-0.0618333	-0.00329397	0.0859728	0.12113	0.159669	0.141233	0.239076	0.642528	0.797829	0.971133	0.998698	0.801652	0.721885	0.332241	0.420607	0.143189
NZ_CP011454.1	384474	384803	+	CDS	GEMMAAP_RS01700	WP_026849176.1	multidrug efflux SMR transporter	3.92225	0.13267	0.0881018	-0.0162474	-0.127975	-0.0188598	-0.0415752	-1.5582	-1.36758	-1.77797	0.841796	0.926517	0.999712	0.758909	0.981948	0.939143	1.36e-08	2.6e-07	7.82e-09
NZ_CP011454.1	3524563	3525066	+	CDS	GEMMAAP_RS14870	WP_026848565.1	hypothetical protein	7.43545	0.132627	-0.224287	-0.348535	-0.536328	-0.306156	-0.426089	-1.98723	-1.78646	-1.91175	0.877293	0.907624	0.833372	0.470129	0.690973	0.573019	5.88e-05	0.000268203	9.41e-05
NZ_CP011454.1	3783705	3784175	-	CDS	GEMMAAP_RS15980	WP_026848410.1	isoprenylcysteine carboxylmethyltransferase family protein	4.33733	0.132617	0.164584	0.23649	-0.0997108	0.0109405	0.0420617	-0.0627399	-0.552086	-0.390364	0.806723	0.893174	0.849967	0.889948	0.996924	0.957025	0.815615	0.046573	0.148203
NZ_CP011454.1	2681101	2682681	-	CDS	GEMMAAP_RS20775	WP_145979106.1	hypothetical protein	6.50721	0.13259	-0.167621	-0.230296	-0.696876	-0.612979	-0.687699	-1.93112	-1.98751	-2.13402	0.869543	0.931656	0.919308	0.314093	0.328915	0.27585	3.93e-05	5.1e-05	1.66e-05
NZ_CP011454.1	269527	270717	-	CDS	GEMMAAP_RS01185	WP_053334025.1	flavodoxin-dependent (E)-4-hydroxy-3-methylbut-2-enyl-diphosphate synthase	7.59352	0.132365	0.148057	0.200399	0.273682	0.332483	0.235306	0.703578	0.58186	0.878574	0.51575	0.73864	0.569641	0.203858	0.0900532	0.254125	3.83e-06	8.04e-05	1.31e-07
NZ_CP011454.1	4117250	4119862	+	CDS	GEMMAAP_RS17365	WP_053333560.1	zinc-dependent metalloprotease	6.5918	0.132357	-0.0464326	-0.0675511	0.12573	-0.117215	-0.165037	0.481832	0.471821	0.305382	0.675692	0.952985	0.975563	0.741886	0.736871	0.63239	0.00762166	0.0114185	0.0823583
NZ_CP011454.1	1134557	1135123	+	CDS	GEMMAAP_RS04685	WP_026850043.1	hypothetical protein	6.54371	0.131904	-0.0925372	0.0733065	0.446945	0.332307	0.165595	0.888422	1.08976	1.13916	0.676602	0.91699	0.971133	0.157108	0.241823	0.627122	1.4e-05	1.47e-06	3.86e-07
NZ_CP011454.1	919661	921088	-	CDS	GEMMAAP_RS03845	WP_026850170.1	carboxypeptidase regulatory-like domain-containing protein	6.67896	0.131775	0.167375	0.000398655	-0.260483	-0.188956	-0.0874126	0.176344	-0.274586	0.0739213	0.524199	0.685549	0.999712	0.255557	0.376427	0.746766	0.16135	0.0391231	0.569594
NZ_CP011454.1	2745681	2746709	+	CDS	GEMMAAP_RS11695	WP_043580685.1	sugar ABC transporter substrate-binding protein	4.56003	0.131613	0.18607	0.199421	-0.166079	-0.357272	-0.097635	-0.221381	-0.495326	-0.200682	0.623852	0.726487	0.718315	0.605995	0.145437	0.768624	0.14253	0.0031751	0.198356
NZ_CP011454.1	2237669	2238979	-	CDS	GEMMAAP_RS09460	WP_026850752.1	GAF domain-containing protein	6.56249	0.1316	0.0981485	-0.0777529	0.116633	0.0701061	0.100198	-0.43171	-0.861888	-0.496146	0.449895	0.829225	0.993197	0.642437	0.742911	0.63659	0.00029934	4.93e-08	7.07e-05
NZ_CP011454.1	687344	689203	-	CDS	GEMMAAP_RS02980	WP_053333995.1	acyl-CoA dehydrogenase family protein	6.23625	0.131466	-0.0410961	-0.139988	0.05532	0.0439812	0.12092	-0.264659	-0.200171	-0.34048	0.439616	0.941504	0.83523	0.820874	0.851681	0.533308	0.0144553	0.0720941	0.00270868
NZ_CP011454.1	4537360	4537896	+	CDS	GEMMAAP_RS19115	WP_043581781.1	hypothetical protein	4.09718	0.131125	-0.304507	0.0549734	-0.318201	-0.0919672	-0.252964	1.15334	0.568276	1.19317	0.679589	0.512375	0.996891	0.344944	0.86881	0.410819	1.19e-07	0.00186392	9.23e-08
NZ_CP011454.1	2349559	2350668	-	CDS	GEMMAAP_RS09975	WP_158514805.1	radical SAM family heme chaperone HemW	6.24391	0.130753	-0.186285	-0.275111	0.0418273	-0.0613656	-0.217548	-0.151877	-0.0345622	-0.0640358	0.565053	0.667658	0.484992	0.999704	0.834156	0.358118	0.260865	0.826148	0.650849
NZ_CP011454.1	1660426	1661472	+	CDS	GEMMAAP_RS06890	WP_026850375.1	peptide chain release factor 1	5.57761	0.130412	-0.0929825	-0.206989	-0.178012	-0.0592242	-0.233646	-0.978619	-0.490748	-1.17042	0.61472	0.89517	0.680198	0.551566	0.86029	0.370834	4.61e-07	0.00272378	5.61e-08
NZ_CP011454.1	2713848	2715020	-	CDS	GEMMAAP_RS11560	WP_026849650.1	P1 family peptidase	6.69697	0.130143	0.0138432	0.105525	0.0866996	-0.0274527	0.0756292	0.677531	0.416976	0.876199	0.577574	0.999855	0.999712	0.800261	0.947704	0.804551	2.47e-05	0.00515256	6.36e-07
NZ_CP011454.1	2642736	2643977	-	CDS	GEMMAAP_RS11275	WP_082821251.1	acyl-CoA dehydrogenase family protein	5.16364	0.129943	0.131304	0.0545613	-0.0589333	0.108782	0.139933	-0.805845	-1.07728	-1.04289	0.555329	0.790303	0.992231	0.900509	0.666549	0.573019	1.21e-06	4.09e-08	4.96e-08
NZ_CP011454.1	2110565	2112055	+	CDS	GEMMAAP_RS08815	WP_043581659.1	FxLYD domain-containing protein	7.8467	0.129922	-0.43301	0.0578099	-0.240494	-0.4866	-0.422654	-0.459985	-0.764299	-0.853449	0.747127	0.391857	0.991629	0.553829	0.155574	0.22793	0.0346997	0.00138979	0.000328181
NZ_CP011454.1	3860863	3861720	-	CDS	GEMMAAP_RS16345	WP_026848351.1	archaetidylserine decarboxylase	5.81179	0.129702	-0.0782163	0.0642764	-0.0238408	0.0540308	-0.00114622	0.600676	0.116575	0.739166	0.597903	0.914728	0.966226	0.959961	0.866615	0.998911	0.000126143	0.441019	1.05e-05
NZ_CP011454.1	2588288	2589238	+	CDS	GEMMAAP_RS10995	WP_026849732.1	lysophospholipid acyltransferase family protein	5.86072	0.129584	0.0738855	0.114205	-0.0269286	0.0954266	0.0849143	0.973705	0.582818	1.12735	0.594571	0.917341	0.874425	0.95738	0.732593	0.785892	1.37e-07	0.000262877	1.46e-08
NZ_CP011454.1	632356	633987	+	CDS	GEMMAAP_RS02780	WP_043580184.1	twin-arginine translocation signal domain-containing protein	6.41229	0.129144	0.22717	-0.0564584	0.111777	0.151585	0.134158	1.12991	1.24442	1.33266	0.667802	0.670402	0.985589	0.764458	0.63219	0.68898	2.22e-07	1.04e-07	1.71e-08
NZ_CP011454.1	1888142	1889101	+	CDS	GEMMAAP_RS07820	WP_026850514.1	hypothetical protein	7.32142	0.128951	-0.446837	0.0750438	-0.260646	-0.395405	-0.564161	-0.310905	-0.817545	-0.661298	0.786224	0.460052	0.985589	0.579773	0.327589	0.148684	0.194231	0.00217314	0.00831678
NZ_CP011454.1	2541168	2545757	-	CDS	GEMMAAP_RS10815	WP_158514819.1	translocation/assembly module TamB domain-containing protein	8.45857	0.1287	-0.0303825	0.788958	-0.270733	0.00250258	-0.100247	-0.853976	-0.715357	-0.748905	0.783552	0.977725	0.0986685	0.541744	0.999236	0.863629	0.000883625	0.00531559	0.00279
NZ_CP011454.1	2553362	2553784	-	CDS	GEMMAAP_RS10860	WP_043580952.1	type II secretion system major pseudopilin GspG	8.34601	0.128641	-0.230517	0.591188	0.272185	-0.0171415	-0.0313066	2.81167	1.90121	3.07658	0.869543	0.893174	0.560128	0.718132	0.996558	0.983819	1.93e-07	3.93e-05	5.61e-08
NZ_CP011454.1	367986	369701	-	CDS	GEMMAAP_RS01625	WP_026849165.1	class I SAM-dependent methyltransferase	4.85396	0.128419	0.225096	0.0387582	-0.197646	0.088431	-0.0717265	0.708861	0.390026	0.765611	0.703853	0.708165	0.999712	0.602482	0.931791	0.87352	0.000236209	0.0359843	0.000125565
NZ_CP011454.1	2416485	2417111	-	CDS	GEMMAAP_RS10265	WP_145979087.1	DNA repair protein RadC	6.90532	0.128281	-0.00189049	-0.000389767	0.193305	0.105327	0.0478568	0.255491	0.330463	0.667309	0.711513	0.999855	0.999712	0.605918	0.786775	0.931167	0.176298	0.0952064	0.00105835
NZ_CP011454.1	2586025	2586855	-	CDS	GEMMAAP_RS10980	WP_053334146.1	polyphosphate kinase	5.56783	0.12802	0.0301013	0.145589	0.341116	0.235763	0.280918	0.37984	0.174698	0.444067	0.608483	0.964279	0.806671	0.181741	0.32628	0.227912	0.00895523	0.24476	0.00319649
NZ_CP011454.1	1142365	1144080	-	CDS	GEMMAAP_RS04720	WP_158514734.1	peptide ABC transporter substrate-binding protein	6.25456	0.127919	0.23891	0.0385364	-0.162228	-0.0616546	0.000565407	0.490647	0.0827616	0.576776	0.600685	0.538762	0.992231	0.568269	0.843661	0.999579	0.00115999	0.597867	0.000243502
NZ_CP011454.1	1702294	1703589	-	CDS	GEMMAAP_RS07065	WP_202969203.1	MFS transporter	6.45666	0.127717	-0.0165337	1.12693	-0.331725	-0.558523	-0.318197	-1.21191	-1.12174	-1.08324	0.870488	0.999675	0.166438	0.656851	0.363342	0.659071	0.00236598	0.00580911	0.00630068
NZ_CP011454.1	3423115	3424245	-	CDS	GEMMAAP_RS14505	WP_053333708.1	FecR domain-containing protein	6.79434	0.12743	-0.012694	0.17674	-0.120085	-0.00391515	0.0346076	-0.128912	-0.278812	-0.0741177	0.712915	0.993907	0.823704	0.769367	0.999236	0.951849	0.501249	0.161206	0.707664
NZ_CP011454.1	3417677	3418135	-	CDS	GEMMAAP_RS14490	WP_026848618.1	hypothetical protein	6.1299	0.12742	-0.10269	-0.166575	-0.293525	-0.445266	0.0466233	-0.58504	-0.737985	-0.61349	0.844087	0.941504	0.93475	0.642079	0.383701	0.960611	0.0556688	0.0233961	0.0486237
NZ_CP011454.1	4121835	4125017	+	CDS	GEMMAAP_RS17380	WP_053333558.1	efflux RND transporter permease subunit	5.88666	0.127174	0.0468645	-0.00813178	0.0721019	0.00345684	0.0466126	0.318037	0.127409	0.360363	0.597903	0.941504	0.999712	0.824138	0.999236	0.9002	0.0234957	0.390005	0.0121769
NZ_CP011454.1	2123680	2124633	-	CDS	GEMMAAP_RS08885	WP_026850833.1	lysylphosphatidylglycerol synthase domain-containing protein	5.27268	0.127137	-0.188231	-0.239377	0.220498	0.0528632	0.0450433	-0.346792	-0.310131	-0.26196	0.604241	0.68635	0.602054	0.408261	0.869204	0.903609	0.0160113	0.0378867	0.0702624
NZ_CP011454.1	3820396	3821301	-	CDS	GEMMAAP_RS16155	WP_145979183.1	histone deacetylase	5.62717	0.127129	-0.0140281	-0.0727621	0.295278	1.12475	0.291182	1.10157	0.859149	1.4083	0.654257	0.988307	0.966864	0.308004	5.8e-06	0.258092	8.99e-08	7.3e-06	1.88e-09
NZ_CP011454.1	4667658	4668326	-	CDS	GEMMAAP_RS19665	WP_026848896.1	hypothetical protein	4.10421	0.126853	0.00280575	0.240215	0.280998	0.226865	0.225123	0.710344	0.383288	0.87378	0.769207	0.999855	0.83537	0.501361	0.550206	0.573019	0.00116488	0.0788103	0.000178344
NZ_CP011454.1	3054616	3056355	-	CDS	GEMMAAP_RS12940	WP_026849443.1	PAS domain S-box protein	4.91978	0.126773	0.157814	-0.0234212	-0.196417	-0.0476339	0.0348413	-0.160393	0.030682	-0.0194591	0.679106	0.810395	0.999712	0.564538	0.990831	0.94433	0.332446	0.875785	0.915314
NZ_CP011454.1	2689028	2689804	-	CDS	GEMMAAP_RS11455	WP_053334121.1	Stp1/IreP family PP2C-type Ser/Thr phosphatase	7.6235	0.126761	0.20611	0.0171237	-0.0432891	0.0364578	0.203353	-0.365983	-0.683158	-0.242845	0.598192	0.634109	0.999712	0.905603	0.9287	0.419557	0.0124406	5.94e-05	0.088217
NZ_CP011454.1	2323667	2324107	-	CDS	GEMMAAP_RS09840	WP_026850702.1	hypothetical protein	6.79566	0.126551	-0.0647877	-0.100447	0.224147	0.126533	0.0250353	-0.292268	-0.194193	-0.0661943	0.622315	0.931739	0.902521	0.404243	0.652473	0.95558	0.0508232	0.215136	0.668915
NZ_CP011454.1	2512053	2513660	-	CDS	GEMMAAP_RS10710	WP_158514817.1	peptide ABC transporter substrate-binding protein	5.31877	0.1263	-0.0219198	0.286179	0.145918	-0.0635941	-0.0986822	0.0647405	0.0731701	0.2257	0.620145	0.971468	0.510086	0.627057	0.841573	0.75125	0.66003	0.648424	0.120638
NZ_CP011454.1	1317576	1318580	+	CDS	GEMMAAP_RS05530	WP_082821088.1	N-acetylmuramic acid 6-phosphate etherase	6.41567	0.12619	-0.0507513	-0.0185536	0.230608	0.203194	0.0575348	-0.597375	-0.0510275	-0.60771	0.572286	0.941504	0.999712	0.341969	0.360986	0.861083	7.67e-05	0.734444	7.79e-05
NZ_CP011454.1	2280912	2282099	-	CDS	GEMMAAP_RS09640	WP_026850729.1	RIP metalloprotease RseP	7.63496	0.125908	-0.389291	-0.187572	0.0607163	-0.187155	-0.321328	-1.08277	-1.13407	-1.4787	0.703564	0.358457	0.768568	0.894764	0.56307	0.290749	1.83e-06	1.79e-06	1.75e-08
NZ_CP011454.1	3688149	3689630	+	CDS	GEMMAAP_RS15605	WP_043579404.1	NAD(P)/FAD-dependent oxidoreductase	5.61852	0.125836	0.167508	-0.0770867	-0.069842	-0.20445	-0.0467978	0.0463736	-0.0612795	0.0705508	0.675903	0.788098	0.971133	0.870745	0.477432	0.918161	0.786159	0.7446	0.684612
NZ_CP011454.1	4470932	4473691	+	CDS	GEMMAAP_RS18825	WP_026850964.1	TonB-dependent receptor	5.73088	0.125714	0.167688	0.383753	0.0768677	0.135732	-0.0121343	1.33406	1.30233	1.64598	0.775979	0.862947	0.564863	0.895878	0.756752	0.9942	8.54e-07	2.41e-06	3.73e-08
NZ_CP011454.1	4176478	4176777	-	CDS	GEMMAAP_RS17610	WP_026848167.1	Dabb family protein	5.02884	0.124826	0.0479799	-0.13465	-0.237234	-0.126381	0.0131957	0.487113	0.464931	0.519177	0.724654	0.968471	0.912806	0.543929	0.736871	0.990606	0.0103678	0.0184625	0.00790386
NZ_CP011454.1	1162158	1163075	+	CDS	GEMMAAP_RS04790	WP_145979009.1	hypothetical protein	6.98336	0.124455	-0.796262	-0.298305	-0.277008	-0.603652	-0.590231	-0.68566	-1.01913	-1.23338	0.834954	0.140884	0.768568	0.62719	0.186246	0.202347	0.0184525	0.00150358	0.00017824
NZ_CP011454.1	3215588	3216154	+	CDS	GEMMAAP_RS13605	WP_053333753.1	redoxin domain-containing protein	7.43444	0.124389	0.0440335	-0.294512	-0.496795	-0.369472	-0.227346	0.205811	-0.281762	-0.274257	0.668724	0.951553	0.51547	0.0936147	0.159107	0.437911	0.209896	0.101487	0.0954623
NZ_CP011454.1	3539556	3540296	-	CDS	GEMMAAP_RS14950	WP_026848554.1	hypothetical protein	5.36168	0.124056	-0.202703	-0.527992	-0.689671	-0.69398	-0.554112	0.858523	1.13365	0.955966	0.893691	0.925009	0.746975	0.394221	0.318983	0.454026	0.0339008	0.00880853	0.0206467
NZ_CP011454.1	175354	175923	-	CDS	GEMMAAP_RS00780	WP_026849037.1	SCO family protein	5.1822	0.123993	-0.358897	-0.432879	-0.198642	0.999183	-0.406448	1.25332	0.336904	0.377177	0.844839	0.726487	0.668676	0.763856	0.0195764	0.436543	9.9e-05	0.263408	0.191006
NZ_CP011454.1	1739123	1739680	+	CDS	GEMMAAP_RS07220	WP_158514765.1	hypothetical protein	6.85506	0.123805	-0.0665565	0.155764	-0.0173042	0.0125032	-0.127277	0.00538414	-0.18783	-0.315681	0.650182	0.934033	0.794028	0.975613	0.988105	0.677371	0.973901	0.248911	0.0435153
NZ_CP011454.1	3900679	3901266	-	CDS	GEMMAAP_RS16485	WP_145979195.1	hypothetical protein	4.67022	0.123709	-0.044464	-0.275669	-0.0639958	0.306687	0.0713958	-0.321594	1.04465	-0.0331772	0.870488	0.97677	0.886205	0.958703	0.628393	0.94334	0.340501	0.00401796	0.929611
NZ_CP011454.1	3922421	3923317	-	CDS	GEMMAAP_RS16570	WP_075071552.1	serine hydrolase	7.17943	0.123346	-0.162386	2.00936	-2.23547	-1.02703	-1.91053	-2.53749	-3.20906	-3.01023	0.951356	0.965706	0.320281	0.170351	0.480753	0.184283	0.00688782	0.00221463	0.00282539
NZ_CP011454.1	1786640	1787134	+	CDS	GEMMAAP_RS07420	WP_026850458.1	ribose 5-phosphate isomerase B	6.20205	0.123267	-0.100477	0.179248	0.0756681	0.236454	0.218498	-0.00653433	0.192907	0.0211116	0.555329	0.859467	0.652637	0.785442	0.244783	0.296321	0.960562	0.139168	0.875782
NZ_CP011454.1	418069	419241	+	CDS	GEMMAAP_RS01865	WP_026849198.1	DUF4249 family protein	4.66593	0.123095	0.115224	0.0688395	0.343893	0.343216	0.272859	-0.273008	-0.086477	-0.233679	0.65962	0.864223	0.970983	0.212853	0.158816	0.287987	0.0753543	0.611688	0.14046
NZ_CP011454.1	1920209	1921510	+	CDS	GEMMAAP_RS07930	WP_053334414.1	asparagine--tRNA ligase	6.08426	0.122657	0.137251	-0.15612	-0.0636397	-0.113529	-0.114828	0.0590154	-0.356328	-0.129539	0.517424	0.736802	0.926996	0.810672	0.590435	0.609638	0.614396	0.00439256	0.263106
NZ_CP011454.1	1837885	1838622	+	CDS	GEMMAAP_RS07620	WP_026850485.1	SDR family NAD(P)-dependent oxidoreductase	5.98651	0.122526	0.20886	0.0130032	0.203331	0.11161	0.193473	0.132725	0.253881	0.365174	0.553158	0.531075	0.999712	0.372002	0.630477	0.364178	0.274861	0.0477074	0.0044969
NZ_CP011454.1	3967217	3968980	-	CDS	GEMMAAP_RS16740	WP_053333594.1	hypothetical protein	5.67427	0.12215	0.253526	0.180563	0.0265237	0.126063	0.0298493	0.696098	0.830092	0.723506	0.616544	0.471409	0.718315	0.957123	0.631159	0.942565	1.48e-05	2.34e-06	1.04e-05
NZ_CP011454.1	2623078	2623377	-	CDS	GEMMAAP_RS11190	WP_026849705.1	hypothetical protein	4.55233	0.12193	-0.0992701	-0.115361	0.109047	-0.141295	-0.109	0.952897	0.453374	1.08803	0.760717	0.92505	0.971133	0.818098	0.722561	0.808442	2.44e-05	0.0291195	4.89e-06
NZ_CP011454.1	1197988	1198692	-	CDS	GEMMAAP_RS04945	WP_026850001.1	A/G-specific adenine glycosylase	4.48396	0.121744	0.35448	0.0308952	-0.107587	0.00720381	-0.0124416	-1.07896	-1.02526	-1.0427	0.786224	0.569171	0.999712	0.840884	0.999075	0.9942	3.71e-05	0.000131741	0.000109986
NZ_CP011454.1	1493281	1494447	+	CDS	GEMMAAP_RS06145	WP_145979276.1	FAD-binding oxidoreductase	6.4765	0.121681	-0.502587	-0.433925	-0.0603839	-0.286866	-0.423113	-0.507027	-0.321933	-0.537344	0.695224	0.106184	0.30822	0.889948	0.308549	0.125864	0.00398771	0.0683507	0.00279
NZ_CP011454.1	4660096	4660320	-	CDS	GEMMAAP_RS19615	WP_145979261.1	hypothetical protein	4.04396	0.121627	-0.457019	-0.277061	-0.1633	-0.381889	-0.218921	-0.960487	-1.40871	-1.27099	0.784979	0.37264	0.738923	0.736425	0.29497	0.607254	0.000101473	2.07e-06	8.33e-06
NZ_CP011454.1	3335659	3336438	-	CDS	GEMMAAP_RS14155	WP_145979152.1	hypothetical protein	5.97816	0.121551	-0.197504	-0.189435	0.0562984	0.392736	-0.0649498	0.0834177	-0.0198288	0.276238	0.617957	0.645898	0.691754	0.87368	0.0699734	0.842816	0.554664	0.904743	0.0495023
NZ_CP011454.1	3520397	3521740	+	CDS	GEMMAAP_RS14855	WP_053333690.1	Type 1 glutamine amidotransferase-like domain-containing protein	5.41533	0.121058	-0.0683565	-0.157773	0.126861	-0.0178674	0.0775144	-0.175362	-0.0056759	-0.195789	0.650182	0.929364	0.801121	0.682901	0.977661	0.813537	0.233196	0.976969	0.193549
NZ_CP011454.1	2485215	2487149	+	CDS	GEMMAAP_RS10605	WP_053334168.1	GGDEF domain-containing response regulator	6.22996	0.120952	0.251461	0.0715013	-0.0711107	-0.0171488	-0.0646053	-0.228646	-0.786757	-0.47661	0.618237	0.391857	0.92985	0.800819	0.972023	0.816689	0.0675203	1.63e-06	0.000558391
NZ_CP011454.1	2833139	2834731	+	CDS	GEMMAAP_RS12020	WP_026849581.1	Ppx/GppA family phosphatase	6.74825	0.120605	0.00124751	0.0576207	-0.336524	-0.0298118	-0.186924	0.0257192	-0.19709	-0.170649	0.530704	0.999855	0.999712	0.107971	0.928874	0.35837	0.834118	0.107424	0.145207
NZ_CP011454.1	1234331	1234738	+	CDS	GEMMAAP_RS05105	WP_026849978.1	30S ribosomal protein S12	7.78911	0.120545	-0.109557	-0.194395	-0.325868	-0.00221781	-0.307063	-1.10416	-0.201776	-1.0601	0.744065	0.912032	0.787279	0.353031	0.999236	0.371878	4.67e-06	0.335578	8.33e-06
NZ_CP011454.1	2538013	2538702	+	CDS	GEMMAAP_RS10800	WP_043580719.1	Ig-like domain-containing protein	9.09414	0.120509	0.134404	-0.0974486	0.0254203	-0.0626794	-0.0236972	-0.148414	-0.557121	-0.193466	0.699951	0.860884	0.922233	0.964475	0.873597	0.964544	0.39042	0.0029487	0.255665
NZ_CP011454.1	3223903	3225216	+	CDS	GEMMAAP_RS13655	WP_026848747.1	glycogen-binding domain-containing protein	9.06113	0.120447	0.122377	0.697968	0.0683731	-0.181665	0.097504	0.884569	0.651602	0.866033	0.703177	0.871668	0.0327449	0.869041	0.557778	0.798459	1.6e-05	0.000792258	1.94e-05
NZ_CP011454.1	1547080	1548168	+	CDS	GEMMAAP_RS06420	WP_026850304.1	hypothetical protein	6.47546	0.120273	-0.244373	-0.375468	-0.0599774	-0.107232	-0.244132	0.328737	0.0630428	0.322177	0.608483	0.497122	0.268989	0.860359	0.687108	0.287987	0.017439	0.679164	0.0203542
NZ_CP011454.1	3704603	3704785	-	CDS	GEMMAAP_RS15680	WP_043579402.1	Flp family type IVb pilin	9.02219	0.120215	0.0514971	-0.276619	-0.405403	-0.32851	-0.283627	0.638124	0.375745	0.303458	0.710932	0.947784	0.573035	0.179759	0.260663	0.358623	0.000900769	0.0446062	0.0868972
NZ_CP011454.1	2368244	2369287	-	CDS	GEMMAAP_RS10075	WP_043581630.1	recombinase RecA	9.21221	0.119781	0.0468684	0.200732	0.128024	0.220552	0.118112	1.05508	0.894948	1.19282	0.598192	0.941504	0.596936	0.622621	0.327988	0.659071	2.81e-08	6.91e-07	3.55e-09
NZ_CP011454.1	2064305	2064916	+	CDS	GEMMAAP_RS08590	WP_026850632.1	hypothetical protein	6.36032	0.119315	-0.406627	-0.312801	-0.232404	-0.453059	-0.465748	-0.943576	-0.757363	-1.39402	0.797285	0.510406	0.674108	0.62416	0.226816	0.220854	0.000265654	0.00295979	3.17e-06
NZ_CP011454.1	729701	730261	+	CDS	GEMMAAP_RS03160	WP_026849386.1	RNA polymerase sigma factor	9.4877	0.119287	0.0911795	-0.0972021	0.1972	0.146374	0.11188	0.0131108	0.0958926	0.142924	0.710935	0.920983	0.927238	0.546344	0.666549	0.770823	0.944886	0.624204	0.419934
NZ_CP011454.1	719646	720707	+	CDS	GEMMAAP_RS03105	WP_026849379.1	phytoene/squalene synthase family protein	6.38706	0.119087	0.170167	0.129121	-0.159462	-0.300951	0.110121	1.33036	0.926494	1.48799	0.604241	0.704858	0.823223	0.552118	0.158816	0.67656	4.13e-10	2.67e-07	6.77e-11
NZ_CP011454.1	1368662	1369897	+	CDS	GEMMAAP_RS05675	WP_053334213.1	lactonase family protein	5.47023	0.118641	0.168509	0.063149	0.27209	0.190622	0.272558	0.0427817	0.00246909	0.0228617	0.563891	0.659183	0.949415	0.208893	0.351032	0.1692	0.731499	0.995692	0.862494
NZ_CP011454.1	4406587	4407756	+	CDS	GEMMAAP_RS18585	WP_053334587.1	histidinol-phosphate aminotransferase family protein	7.19154	0.118309	0.137631	0.38275	0.161155	-0.0450929	0.163484	1.06515	0.943484	1.07065	0.616533	0.789157	0.208684	0.544817	0.892411	0.510349	2.71e-08	3.63e-07	2.3e-08
NZ_CP011454.1	3163577	3164947	-	CDS	GEMMAAP_RS13360	WP_026848792.1	amino acid permease	5.75757	0.118172	0.184713	0.0782961	-0.214381	-0.278717	-0.0520278	0.367916	0.159279	0.179966	0.591552	0.635451	0.999594	0.37991	0.177929	0.87133	0.00521228	0.236502	0.161529
NZ_CP011454.1	2136112	2136885	-	CDS	GEMMAAP_RS08940	WP_053334540.1	3-deoxy-manno-octulosonate cytidylyltransferase	7.95919	0.118166	0.0884918	0.157589	-0.154121	-0.0183601	0.0643661	0.975757	1.01709	1.16778	0.711022	0.922539	0.823223	0.65709	0.981948	0.888193	4.71e-06	4.86e-06	3.12e-07
NZ_CP011454.1	1156480	1157691	+	CDS	GEMMAAP_RS04765	WP_053334254.1	pyridoxal phosphate-dependent aminotransferase	5.56465	0.117911	0.181577	0.139593	0.0501284	0.0369558	0.0744082	0.0407058	-0.302375	-0.0330598	0.588026	0.63755	0.833334	0.877465	0.938218	0.791323	0.755301	0.0243307	0.809005
NZ_CP011454.1	48034	48633	-	CDS	GEMMAAP_RS00205	WP_026848959.1	sugar O-acetyltransferase	5.07664	0.117833	-0.1327	-0.143119	0.259071	0.257726	0.197428	0.174343	0.292289	0.273021	0.65962	0.831651	0.83821	0.352594	0.293494	0.454637	0.231537	0.0575049	0.0678302
NZ_CP011454.1	23347	26622	+	CDS	GEMMAAP_RS00110	WP_145978915.1	DEAD/DEAH box helicase	8.36062	0.117168	-0.133343	0.212038	0.141664	0.301535	0.143686	0.523648	0.524545	0.704952	0.674006	0.840276	0.648602	0.645751	0.232867	0.638971	0.00167085	0.00223838	7.13e-05
NZ_CP011454.1	2379723	2380223	-	CDS	GEMMAAP_RS10115	WP_053334472.1	acetyl-CoA carboxylase biotin carboxyl carrier protein	7.5554	0.116508	0.0965635	-0.187246	-0.00268043	0.0157597	0.104927	-0.192848	-0.0987162	-0.276191	0.555329	0.858526	0.593276	0.998333	0.973693	0.659071	0.108538	0.441019	0.0234854
NZ_CP011454.1	1662763	1663491	+	CDS	GEMMAAP_RS06905	WP_053334354.1	dTMP kinase	7.41698	0.116181	-0.58283	-0.341948	-0.186275	-0.323612	-0.2708	-1.17901	-1.14022	-1.56265	0.70682	0.0415139	0.436179	0.564538	0.241152	0.358118	1.9e-07	6.37e-07	2.61e-09
NZ_CP011454.1	3704213	3704581	-	CDS	GEMMAAP_RS15675	WP_026848454.1	hypothetical protein	9.0733	0.115147	-0.0194641	-0.400283	-0.574764	-0.434077	-0.432346	0.439233	0.212017	0.0117655	0.746319	0.986022	0.397349	0.0802909	0.150554	0.16403	0.0233613	0.292512	0.953736
NZ_CP011454.1	265998	266594	+	CDS	GEMMAAP_RS01160	WP_043580110.1	HD domain-containing protein	6.46051	0.11513	0.0307064	-0.0622987	0.137493	-0.0524167	0.116617	-0.658654	-0.793894	-0.774814	0.509573	0.953828	0.999712	0.499976	0.818414	0.557358	1.07e-06	1.41e-07	1.15e-07
NZ_CP011454.1	637938	639800	-	CDS	GEMMAAP_RS02810	WP_053333988.1	cyclomaltodextrinase N-terminal domain-containing protein	3.41311	0.11513	-0.125191	0.0920108	0.138342	0.0816381	-0.0794652	0.035678	0.313341	-0.0393411	0.80108	0.903806	0.978552	0.907645	0.868318	0.888193	0.873477	0.158989	0.870652
NZ_CP011454.1	2409274	2409981	-	CDS	GEMMAAP_RS10240	WP_053334462.1	tRNA (adenosine(37)-N6)-threonylcarbamoyltransferase complex dimerization subunit type 1 TsaB	6.85844	0.114672	-0.0689261	0.0311823	0.0932949	0.0705591	-0.0396692	0.658861	0.290047	0.763111	0.660145	0.928979	0.992231	0.766455	0.822398	0.924765	7.35e-05	0.0594593	1.12e-05
NZ_CP011454.1	2066558	2067031	+	CDS	GEMMAAP_RS08605	WP_053334444.1	acyl-CoA thioesterase	4.06646	0.114388	0.0828852	0.221879	0.230732	0.0371131	0.0124348	0.750244	0.124327	0.779161	0.827059	0.941504	0.849967	0.656015	0.963745	0.994859	0.00207063	0.637496	0.00192614
NZ_CP011454.1	3624077	3626029	+	CDS	GEMMAAP_RS15320	WP_082821382.1	gamma-glutamyltransferase	5.50384	0.114247	0.133628	0.0243233	-0.183024	-0.236952	-0.0895224	0.380678	0.341159	0.362845	0.563198	0.74235	0.993197	0.413348	0.212225	0.708082	0.00183182	0.00620138	0.00323488
NZ_CP011454.1	3512609	3513406	-	CDS	GEMMAAP_RS14825	WP_026848570.1	cyanophycinase	6.17233	0.114037	0.0106817	0.087899	0.0114198	0.140293	-0.0782586	0.590066	0.435258	0.589565	0.703716	0.993907	0.938921	0.987253	0.64546	0.832467	0.000646072	0.010912	0.00072131
NZ_CP011454.1	3170552	3171238	-	CDS	GEMMAAP_RS13390	WP_026848786.1	hypothetical protein	5.68515	0.11399	0.155777	-0.0913808	-0.342947	-0.0709127	-0.0858325	0.218209	-0.151499	0.405531	0.707389	0.809262	0.938866	0.259174	0.843661	0.813537	0.175481	0.384502	0.015321
NZ_CP011454.1	4282707	4283492	-	CDS	GEMMAAP_RS18065	WP_145979227.1	hypothetical protein	2.32207	0.11383	-0.420627	-1.13388	0.444255	-0.246141	-0.0593449	1.24227	0.91276	1.02837	0.915205	0.814288	0.520154	0.613901	0.785223	0.964544	0.0020736	0.0285556	0.0143844
NZ_CP011454.1	212529	213899	-	CDS	GEMMAAP_RS00925	WP_026849057.1	M28 family metallopeptidase	4.50828	0.113828	0.30247	0.447053	0.329237	0.0596043	0.226576	0.827366	0.711871	0.92627	0.80108	0.644266	0.508241	0.425238	0.92068	0.581416	0.000300429	0.00205033	0.000113156
NZ_CP011454.1	4132077	4132925	+	CDS	GEMMAAP_RS17410	WP_075071558.1	DUF481 domain-containing protein	6.47886	0.113613	0.0847103	-0.230902	-0.10699	-0.0915809	-0.0254445	-0.234493	-0.0545892	-0.398731	0.697521	0.91699	0.647797	0.756031	0.77721	0.95763	0.138609	0.761596	0.0153312
NZ_CP011454.1	2078907	2079881	+	CDS	GEMMAAP_RS08685	WP_145979069.1	PorV/PorQ family protein	6.47434	0.113425	0.205166	0.15134	0.00576168	0.162503	0.164183	-0.128824	-0.168698	0.0666809	0.590828	0.541771	0.724162	0.999704	0.439309	0.457107	0.295307	0.193907	0.601199
NZ_CP011454.1	1536085	1536387	+	CDS	GEMMAAP_RS06355	WP_026850295.1	hypothetical protein	6.46238	0.113386	-0.0863981	-0.308344	0.176149	-0.10755	-0.115408	-0.352446	-0.437221	-0.551039	0.708421	0.917341	0.519682	0.599083	0.742229	0.741616	0.0347835	0.0130965	0.00197188
NZ_CP011454.1	3249644	3250729	+	CDS	GEMMAAP_RS13750	WP_053333744.1	alpha/beta fold hydrolase	4.9577	0.113362	0.0802327	0.184793	-0.214598	-0.263544	0.0415998	0.550255	0.463496	0.646209	0.699951	0.920983	0.772246	0.494533	0.318983	0.951849	0.000827904	0.00524584	0.000190222
NZ_CP011454.1	2755108	2755527	-	CDS	GEMMAAP_RS11730	WP_053334107.1	RidA family protein	3.95536	0.113333	0.115062	0.117182	-0.0495724	-0.333018	-0.103289	-0.914727	-0.585207	-0.919864	0.779169	0.902494	0.934721	0.93353	0.322946	0.816689	6.38e-05	0.00691188	0.000132777
NZ_CP011454.1	2402080	2403375	-	CDS	GEMMAAP_RS10200	WP_158514808.1	PD40 domain-containing protein	8.67058	0.113317	-0.347812	-0.153748	-0.00364075	-0.208376	-0.2499	-0.214546	-0.266452	-0.383726	0.686336	0.324104	0.781442	0.997859	0.431101	0.357175	0.168866	0.102099	0.0160267
NZ_CP011454.1	2949035	2949694	-	CDS	GEMMAAP_RS12520	WP_026849507.1	hypothetical protein	5.89603	0.112974	-0.33172	0.0206429	-0.105767	-0.292877	-0.270651	0.600596	0.789825	0.618802	0.875664	0.788098	0.999712	0.902725	0.636897	0.676885	0.0644635	0.0219784	0.0590467
NZ_CP011454.1	4157491	4159221	+	CDS	GEMMAAP_RS17505	WP_053333552.1	DUF885 family protein	6.40329	0.112932	0.213228	0.0936028	0.0627018	0.0746118	0.221938	0.650714	0.493233	0.618125	0.710935	0.700706	0.931775	0.882114	0.833624	0.452101	0.000290693	0.00520856	0.000547995
NZ_CP011454.1	110683	111900	+	CDS	GEMMAAP_RS00465	WP_082820939.1	DUF4249 family protein	4.55238	0.112915	0.13521	0.300573	0.272944	0.161197	0.369417	0.0963876	0.321216	0.459844	0.763098	0.867553	0.630888	0.447396	0.647386	0.223014	0.607087	0.0951643	0.0162141
NZ_CP011454.1	225182	225883	+	CDS	GEMMAAP_RS00990	WP_026849067.1	hypothetical protein	6.51345	0.112825	0.0135265	0.159324	0.145276	-0.00359876	0.180942	-0.363771	-0.33289	-0.418727	0.736127	0.991568	0.833899	0.693879	0.999236	0.601633	0.0435402	0.0757328	0.0229937
NZ_CP011454.1	716352	717119	-	CDS	GEMMAAP_RS03090	WP_053334002.1	FAD-dependent thymidylate synthase	6.94301	0.112447	-0.0602163	-0.0834345	0.0511918	0.18114	0.184114	0.325705	-0.111017	0.372926	0.604241	0.928979	0.992231	0.870803	0.394971	0.41233	0.0121319	0.412341	0.00481448
NZ_CP011454.1	3500472	3501086	+	CDS	GEMMAAP_RS14800	WP_026848575.1	hypothetical protein	4.30963	0.112401	0.253783	0.190732	-0.193299	-0.0620522	-0.328231	1.06047	0.888021	0.850367	0.773531	0.681592	0.862154	0.643538	0.896911	0.324981	2.45e-06	5.55e-05	7.36e-05
NZ_CP011454.1	710073	710621	+	CDS	GEMMAAP_RS03060	WP_026849372.1	hypothetical protein	9.40804	0.112269	0.350077	0.411827	0.288623	0.224604	0.0782788	1.82704	1.77723	1.9399	0.795247	0.569171	0.470838	0.464765	0.563376	0.88934	1.23e-08	3.94e-08	4.29e-09
NZ_CP011454.1	3975230	3977548	-	CDS	GEMMAAP_RS16780	WP_053333590.1	carbohydrate binding family 9 domain-containing protein	5.67495	0.111848	0.0198957	0.112095	0.110436	0.00110959	0.0704003	1.26472	1.1897	1.45573	0.778823	0.986022	0.938352	0.810672	0.999236	0.889774	3.74e-07	1.84e-06	4.8e-08
NZ_CP011454.1	17170	18144	+	CDS	GEMMAAP_RS00080	WP_145978914.1	hypothetical protein	5.40276	0.111718	-0.0319196	-0.0644117	0.0798312	0.167351	0.158329	0.223706	-0.0296108	0.363811	0.775979	0.968958	0.986183	0.871511	0.649503	0.682004	0.244667	0.898472	0.0632217
NZ_CP011454.1	3425044	3425955	+	CDS	GEMMAAP_RS20625	WP_026848615.1	hypothetical protein	7.25135	0.111673	-0.0800032	-0.217221	-0.387591	-0.0775842	-0.151153	-0.588668	-0.241849	-0.561659	0.895824	0.964279	0.927238	0.613901	0.945536	0.87352	0.125757	0.561775	0.142891
NZ_CP011454.1	203973	206519	-	CDS	GEMMAAP_RS00900	WP_158514680.1	TonB-dependent receptor	6.06189	0.111629	-0.0698831	0.0666315	-0.0781133	-0.189614	0.0151955	0.968074	0.428508	0.99754	0.74447	0.941504	0.981429	0.864884	0.556689	0.98458	5.47e-06	0.0223958	3.85e-06
NZ_CP011454.1	3916829	3918298	+	CDS	GEMMAAP_RS16545	WP_053333608.1	ABC transporter permease subunit	5.96055	0.111441	-0.114997	0.0380804	0.20308	0.097455	0.175204	0.308112	0.30933	0.389314	0.663236	0.858526	0.992231	0.460242	0.728268	0.495624	0.0307437	0.0374704	0.00822948
NZ_CP011454.1	840177	843875	-	CDS	GEMMAAP_RS03560	WP_026850214.1	methionine synthase	8.8056	0.111119	-0.0765978	0.166716	0.134086	-0.134522	0.0234603	0.675079	0.394661	0.704249	0.710935	0.928979	0.768568	0.676577	0.671271	0.963647	0.000221859	0.0233961	0.000132863
NZ_CP011454.1	3267166	3267534	+	CDS	GEMMAAP_RS13830	WP_026848717.1	DUF423 domain-containing protein	5.25955	0.110979	0.0859845	-0.0754125	0.141819	0.0783742	0.158955	0.572301	0.575533	0.543495	0.645655	0.892815	0.999712	0.609708	0.773379	0.513033	0.000105785	0.000171054	0.000243249
NZ_CP011454.1	4209496	4210119	+	CDS	GEMMAAP_RS17745	WP_075071563.1	RNA polymerase sigma-70 factor	4.94215	0.110612	0.134818	0.185586	0.338613	0.127203	0.501878	1.74335	2.23997	2.66126	0.94107	0.959768	0.99005	0.795231	0.940728	0.653727	0.00292626	0.000502689	5.86e-05
NZ_CP011454.1	451357	453588	+	CDS	GEMMAAP_RS01990	WP_053333946.1	serine/threonine-protein kinase	6.68126	0.110043	0.102409	0.172618	0.244996	0.16499	0.0898258	0.897727	0.508267	1.05814	0.69742	0.886111	0.749786	0.387526	0.546404	0.791243	1.83e-06	0.00226898	1.52e-07
NZ_CP011454.1	2472287	2473579	-	CDS	GEMMAAP_RS10540	WP_053334175.1	cation:dicarboxylase symporter family transporter	6.77802	0.109629	-0.09443	0.124785	0.0522107	-0.252627	0.0398695	-0.0699749	-0.248337	-0.433132	0.73567	0.914728	0.886205	0.908817	0.386482	0.938205	0.694503	0.171535	0.0153303
NZ_CP011454.1	550261	550884	-	CDS	GEMMAAP_RS02435	WP_026849281.1	flagellar basal body protein	7.43378	0.109207	-0.0874599	-0.393266	-0.328915	-0.234588	-0.348536	-0.317168	-0.818905	-0.794432	0.779286	0.931656	0.451405	0.356538	0.497648	0.294014	0.110451	0.000320073	0.000305339
NZ_CP011454.1	2705251	2706324	+	CDS	GEMMAAP_RS11525	WP_026849656.1	serine hydrolase	7.49224	0.10912	-0.173071	-0.0779151	-0.475696	-0.236384	-0.495595	-2.05505	-2.06653	-2.16679	0.894329	0.928979	0.992231	0.492013	0.74306	0.454043	1.62e-05	2.67e-05	9.39e-06
NZ_CP011454.1	286227	286550	+	CDS	GEMMAAP_RS01265	WP_026849112.1	sulfurtransferase	4.04845	0.108926	0.13137	-0.110587	0.38685	0.493792	0.194631	0.479915	0.488959	0.557789	0.79215	0.889415	0.952842	0.287547	0.105365	0.612087	0.0142565	0.017399	0.00669693
NZ_CP011454.1	1729000	1729989	-	CDS	GEMMAAP_RS07180	WP_026850421.1	threonine/serine dehydratase	5.15655	0.108786	0.107596	0.254316	0.15736	0.0944109	0.00398905	0.0229394	-0.0370938	0.0168871	0.773787	0.864314	0.565904	0.597261	0.742229	0.996617	0.942541	0.825489	0.928726
NZ_CP011454.1	1521538	1521996	-	CDS	GEMMAAP_RS06275	WP_145979029.1	type II secretion system GspH family protein	6.03055	0.108745	0.0385774	-0.28734	-0.125998	-0.620377	-0.117054	-0.24034	-0.358179	-0.373865	0.676602	0.951553	0.501058	0.673995	0.00352349	0.682262	0.0951849	0.0193517	0.013052
NZ_CP011454.1	793394	793855	-	CDS	GEMMAAP_RS03385	WP_026849421.1	peptidylprolyl isomerase	8.41397	0.108686	0.0217348	0.292129	0.126782	0.111458	0.0630586	1.01223	0.824371	1.17224	0.727271	0.977725	0.520154	0.713569	0.741328	0.886043	1.72e-06	4.78e-05	1.73e-07
NZ_CP011454.1	39444	40268	-	CDS	GEMMAAP_RS00170	WP_082820932.1	AAA family ATPase	5.30215	0.108516	-0.107173	-0.0973215	-0.404672	0.0799152	-0.111032	-0.191385	-0.238208	-0.442864	0.710932	0.884074	0.992231	0.169299	0.879382	0.737938	0.218388	0.147402	0.00797366
NZ_CP011454.1	168747	170360	+	CDS	GEMMAAP_RS00755	WP_026849034.1	ATP-binding cassette domain-containing protein	7.2696	0.108481	0.0527275	0.369323	0.15073	0.492972	0.224422	0.716119	0.158572	0.857259	0.73594	0.946258	0.410625	0.660222	0.0653672	0.466918	0.000180306	0.387116	1.98e-05
NZ_CP011454.1	4134320	4134883	+	CDS	GEMMAAP_RS17420	WP_026848200.1	cytochrome c	4.63836	0.108175	-0.0316354	0.285101	-0.0272096	-0.0216075	-0.0417656	-0.392366	-0.185767	-0.521358	0.751255	0.965706	0.613923	0.966331	0.977271	0.935025	0.026678	0.319504	0.00609096
NZ_CP011454.1	3630720	3631595	-	CDS	GEMMAAP_RS15340	WP_026848497.1	protein phosphatase 2C domain-containing protein	8.36347	0.107814	0.199118	0.453709	0.223704	0.195304	0.274395	0.893222	0.752628	1.01929	0.747906	0.750058	0.269882	0.495754	0.539244	0.37735	2.05e-05	0.000244334	3.04e-06
NZ_CP011454.1	3804665	3806278	+	CDS	GEMMAAP_RS16075	WP_082821406.1	alkaline phosphatase family protein	7.15436	0.107811	-0.322997	-0.257086	-0.094366	-0.408091	-0.36547	0.0923131	-0.2944	-0.310994	0.768496	0.522993	0.652943	0.824459	0.173579	0.232052	0.628983	0.132562	0.0965488
NZ_CP011454.1	3002716	3003672	+	CDS	GEMMAAP_RS12745	WP_202969226.1	MoxR family ATPase	7.03853	0.107411	0.322499	0.571514	-0.0261462	-0.00423181	0.117042	-0.626094	-0.481513	-0.375273	0.775653	0.531075	0.172829	0.969348	0.999236	0.776577	0.00194096	0.0173147	0.0506767
NZ_CP011454.1	1495901	1496785	+	CDS	GEMMAAP_RS06160	WP_053334321.1	sugar phosphate isomerase/epimerase	6.91658	0.10731	-0.18879	-0.0397025	-0.112279	-0.514081	-0.368089	-0.230579	-0.517134	-0.865389	0.786224	0.810395	0.992231	0.803257	0.0983666	0.265994	0.245485	0.0147959	0.000132977
NZ_CP011454.1	497232	498545	+	CDS	GEMMAAP_RS02165	WP_026849238.1	hypothetical protein	5.24982	0.107156	-0.350579	-0.449695	-0.114493	-0.368812	-0.359785	0.526311	0.41372	0.482591	0.793946	0.522993	0.46298	0.80851	0.26942	0.291625	0.00950852	0.0474018	0.018668
NZ_CP011454.1	1094130	1094900	-	CDS	GEMMAAP_RS04545	WP_082821060.1	thioredoxin domain-containing protein	6.58843	0.107124	0.0243598	-0.104217	-0.0274965	0.158775	0.0342701	0.839522	0.869972	0.862419	0.706979	0.999855	0.954118	0.959456	0.56486	0.940671	5.54e-06	6.21e-06	3.92e-06
NZ_CP011454.1	2427157	2430483	-	CDS	GEMMAAP_RS10300	WP_026849832.1	preprotein translocase subunit SecA	9.6312	0.106973	-0.456187	-0.250727	-0.539749	-0.574325	-0.653922	-1.33011	-1.40462	-1.73045	0.832037	0.440482	0.752824	0.180255	0.131697	0.103276	6.14e-06	5.27e-06	1.29e-07
NZ_CP011454.1	1324547	1327570	+	CDS	GEMMAAP_RS05555	WP_026849900.1	PD40 domain-containing protein	6.00518	0.106625	0.0607022	0.165357	0.206584	0.21714	0.15244	-0.215115	0.221005	-0.0633106	0.700636	0.938883	0.768568	0.465127	0.385763	0.595891	0.147348	0.154477	0.686121
NZ_CP011454.1	4498933	4500048	-	CDS	GEMMAAP_RS18960	WP_053334607.1	histidine kinase	3.7537	0.106436	-0.0192802	0.196166	-0.274014	-0.100608	-0.0835589	0.250589	-0.0295414	0.290998	0.765161	0.983871	0.862154	0.411633	0.772149	0.829455	0.127253	0.882361	0.0882707
NZ_CP011454.1	222560	223897	+	CDS	GEMMAAP_RS00980	WP_026849065.1	argininosuccinate synthase	7.31741	0.106427	0.00431002	-0.0664183	0.182484	0.0179586	0.00866507	0.135983	-0.297099	0.0943639	0.59896	0.999855	0.992231	0.397236	0.965721	0.989994	0.254072	0.0191253	0.432292
NZ_CP011454.1	721572	722687	-	CDS	GEMMAAP_RS03115	WP_026849381.1	hypothetical protein	6.20092	0.106425	-0.325107	-0.236052	-0.111905	-0.369519	-0.318715	-0.127377	-0.429713	-0.194159	0.73594	0.420672	0.661674	0.764458	0.168704	0.251155	0.450662	0.0161373	0.24829
NZ_CP011454.1	3885881	3887977	+	CDS	GEMMAAP_RS16425	WP_202969154.1	PQQ-binding-like beta-propeller repeat protein	6.61138	0.106419	0.0229085	0.246093	0.164281	0.162669	0.267888	1.2822	1.37928	1.32708	0.817671	0.985475	0.75512	0.725937	0.702736	0.500522	2.45e-06	1.67e-06	1.54e-06
NZ_CP011454.1	1891660	1892610	+	CDS	GEMMAAP_RS07835	WP_202969205.1	16S rRNA (cytosine(1402)-N(4))-methyltransferase RsmH	6.69598	0.105861	0.0904615	-0.0390331	-0.255742	-0.311203	-0.161032	0.420735	0.292558	0.495599	0.631571	0.871495	0.999712	0.259846	0.119292	0.479139	0.00165748	0.0277167	0.000347426
NZ_CP011454.1	3656299	3656676	+	CDS	GEMMAAP_RS15465	WP_053333657.1	non-heme iron oxygenase ferredoxin subunit	7.77887	0.105373	-0.468496	0.283902	0.5053	-0.770674	0.434517	-2.98583	-3.59801	-4.1508	0.910785	0.74235	0.886186	0.497148	0.253987	0.574368	8.14e-07	2.02e-07	2.31e-08
NZ_CP011454.1	2145150	2145389	-	CDS	GEMMAAP_RS08990	WP_026850819.1	acyl carrier protein	7.44571	0.105098	0.0393005	-0.0133493	-0.250919	0.0524087	-0.234798	-1.23392	-1.19128	-1.49862	0.729399	0.959653	0.999712	0.396757	0.897995	0.419557	5.93e-08	2.09e-07	3.03e-09
NZ_CP011454.1	486571	487455	-	CDS	GEMMAAP_RS02105	WP_053333960.1	cupin domain-containing protein	4.09858	0.104756	-0.0314297	-0.317955	0.0269966	0.00898725	0.439507	-0.296964	0.0555508	-0.30883	0.859408	0.971763	0.698129	0.975613	0.996924	0.217683	0.172658	0.82637	0.17881
NZ_CP011454.1	4283710	4286619	+	CDS	GEMMAAP_RS18070	WP_082821469.1	CHAT domain-containing protein	4.8725	0.104526	0.163705	0.101068	0.489673	0.338474	0.591645	-0.292682	-0.209144	-0.262335	0.822766	0.864082	0.966084	0.206525	0.354003	0.0991531	0.175985	0.368833	0.242622
NZ_CP011454.1	4380474	4382135	-	CDS	GEMMAAP_RS18470	WP_053334579.1	ATP-binding cassette domain-containing protein	4.80912	0.104522	-0.0325555	-0.0909028	0.348343	0.120337	0.228602	0.608764	0.328548	0.420082	0.940892	0.968958	0.966864	0.341969	0.759577	0.517985	0.0025108	0.103838	0.0350052
NZ_CP011454.1	3437817	3439079	-	CDS	GEMMAAP_RS14565	WP_026848605.1	4-hydroxy-3-methylbut-2-enyl diphosphate reductase	7.44082	0.104373	0.0739853	0.0453654	0.146601	-0.192828	0.125593	0.133266	-0.406104	-0.0713914	0.61472	0.895311	0.972791	0.520153	0.34317	0.588237	0.268877	0.00221039	0.564504
NZ_CP011454.1	3649097	3649360	-	CDS	GEMMAAP_RS15420	WP_026848488.1	ferredoxin family protein	8.11613	0.104338	-0.129118	0.455886	-0.20888	-0.349788	-0.232583	-1.52789	-1.7679	-1.61564	0.841796	0.917341	0.491516	0.662941	0.398343	0.629445	1.46e-06	3.74e-07	6.39e-07
NZ_CP011454.1	965541	966086	+	CDS	GEMMAAP_RS04020	WP_053334284.1	DUF3299 domain-containing protein	7.07213	0.103957	-0.00144625	-0.348248	-0.30893	-0.123866	-0.229314	0.439442	0.359878	0.32738	0.691804	0.999855	0.320281	0.226094	0.647607	0.358264	0.00340966	0.0178741	0.0244722
NZ_CP011454.1	3910164	3910940	-	CDS	GEMMAAP_RS16525	WP_053333610.1	DUF4397 domain-containing protein	7.24138	0.103925	0.192064	0.193149	-0.243364	-0.216162	-0.105855	0.0427804	0.225532	-0.168281	0.719939	0.731305	0.706381	0.395088	0.420288	0.753406	0.79603	0.173595	0.286106
NZ_CP011454.1	293075	294160	-	CDS	GEMMAAP_RS01305	WP_043580122.1	PD40 domain-containing protein	6.39582	0.103849	-0.501422	-0.0510909	0.10003	0.354735	0.206506	0.136453	-0.445246	0.240812	0.817671	0.306577	0.992231	0.842946	0.327589	0.625507	0.532636	0.051739	0.26517
NZ_CP011454.1	1439482	1441401	+	CDS	GEMMAAP_RS05945	WP_026849836.1	glycoside hydrolase family 3 C-terminal domain-containing protein	6.48644	0.103771	-0.237315	0.0740897	0.139541	-0.238097	-0.0909007	-0.0110605	-0.0860266	-0.414301	0.80178	0.740809	0.980694	0.753437	0.504788	0.85287	0.959098	0.705697	0.0454794
NZ_CP011454.1	30286	31587	-	CDS	GEMMAAP_RS00125	WP_026848947.1	dipeptidase	4.78955	0.103745	0.32224	0.39993	-0.719624	-0.362552	-0.64453	-0.206359	-0.240322	-0.38827	0.859408	0.731305	0.652637	0.163266	0.429896	0.14638	0.440361	0.39888	0.155907
NZ_CP011454.1	3205873	3207015	+	CDS	GEMMAAP_RS13565	WP_026848760.1	patatin-like phospholipase family protein	6.03296	0.103562	0.142453	0.275097	0.241554	-0.0397011	0.191372	0.128291	-0.115311	0.208606	0.700396	0.791958	0.51547	0.361841	0.921151	0.458987	0.37447	0.456859	0.149215
NZ_CP011454.1	4052800	4053363	+	CDS	GEMMAAP_RS17090	WP_026848242.1	hypothetical protein	3.489	0.103468	0.107501	0.0347734	0.73695	0.0180815	0.0137805	1.13684	0.894896	1.29356	0.912503	0.949411	0.999712	0.313091	0.996558	0.996617	0.00289197	0.0222133	0.00125355
NZ_CP011454.1	2504337	2504954	-	CDS	GEMMAAP_RS10680	WP_053334162.1	cytochrome c family protein	8.07353	0.103456	0.264423	-0.0431945	-0.261831	-0.10454	-0.189035	-1.24133	-1.0266	-1.13065	0.716003	0.532985	0.989254	0.341969	0.73518	0.502246	2.41e-08	8.33e-07	9.82e-08
NZ_CP011454.1	4597995	4599473	+	CDS	GEMMAAP_RS19345	WP_026848844.1	type VI secretion system contractile sheath large subunit	7.50946	0.103293	0.224784	0.10041	0.300032	0.0985633	0.316006	0.703166	0.645492	0.62574	0.724062	0.644266	0.913286	0.286312	0.756752	0.225125	9.23e-05	0.000365029	0.000342426
NZ_CP011454.1	1372073	1373716	+	CDS	GEMMAAP_RS05690	WP_082821094.1	SDR family oxidoreductase	6.75957	0.103293	0.0775238	0.145078	-0.208404	-0.0176077	-0.211876	0.146417	-0.331307	0.0308192	0.65966	0.90234	0.75512	0.39335	0.972978	0.358118	0.266433	0.0184625	0.994873
NZ_CP011454.1	1012078	1013250	+	CDS	GEMMAAP_RS04225	WP_075071421.1	efflux RND transporter periplasmic adaptor subunit	2.11172	0.103201	-0.367011	0.108112	-0.154279	-0.645728	-0.260927	0.563929	0.638425	0.901173	0.918605	0.835874	0.992231	0.894404	0.369937	0.770823	0.129563	0.107759	0.0228653
NZ_CP011454.1	2039206	2039634	-	CDS	GEMMAAP_RS08470	WP_053334434.1	response regulator	5.2312	0.103129	0.272014	0.0706272	0.133373	0.00649937	0.135318	0.402295	-0.143704	0.526669	0.786224	0.624409	0.981429	0.746975	0.998434	0.727542	0.0311274	0.475518	0.00665705
NZ_CP011454.1	362737	363690	+	CDS	GEMMAAP_RS01600	WP_043580136.1	hypothetical protein	7.8879	0.102982	0.118617	0.63897	0.190659	0.107719	0.134879	0.639265	0.560572	0.715114	0.775979	0.891686	0.0890995	0.593693	0.773101	0.722374	0.00117456	0.00478182	0.000381868
NZ_CP011454.1	3751742	3753190	+	CDS	GEMMAAP_RS15870	WP_026848426.1	amino acid decarboxylase	5.6488	0.102895	-0.0484609	-0.00168651	0.122832	0.583974	0.186155	-0.193354	-0.0572433	-0.199445	0.71166	0.943053	0.999712	0.70342	0.00812637	0.493941	0.194816	0.736334	0.191035
NZ_CP011454.1	1710574	1711842	-	CDS	GEMMAAP_RS07100	WP_026850407.1	pyridoxal phosphate-dependent aminotransferase	6.16914	0.102803	0.109603	0.060512	-0.0535959	0.00141175	-0.0417169	-0.582591	-0.612404	-0.634703	0.678617	0.859467	0.966084	0.880787	0.999236	0.909575	0.000144985	0.000141215	6.91e-05
NZ_CP011454.1	3084968	3085675	-	CDS	GEMMAAP_RS13085	WP_043579529.1	PEP-CTERM sorting domain-containing protein	11.357	0.102152	0.0767021	0.150667	-0.224459	-0.135525	0.139053	0.390528	0.25046	0.200584	0.783552	0.938883	0.847642	0.514073	0.711334	0.721885	0.0407334	0.206307	0.283385
NZ_CP011454.1	4387014	4388477	-	CDS	GEMMAAP_RS18490	WP_026850912.1	DUF839 domain-containing protein	3.53652	0.102051	-0.158008	0.171793	0.411946	0.221267	-0.0228999	0.892336	0.672324	1.25872	0.859643	0.895311	0.927238	0.39737	0.647386	0.982736	0.000682754	0.0111153	1.62e-05
NZ_CP011454.1	2235988	2236596	+	CDS	GEMMAAP_RS09450	WP_026850754.1	transcriptional repressor LexA	5.93617	0.101936	0.170539	-0.0882499	-0.105436	-0.0430932	-0.0849921	0.514117	0.288137	0.62778	0.763533	0.790303	0.950531	0.785442	0.931791	0.828298	0.00371216	0.105371	0.000696549
NZ_CP011454.1	4306513	4308567	-	CDS	GEMMAAP_RS18145	WP_075071568.1	hypothetical protein	2.57324	0.101915	-0.164418	0.178169	0.380802	-0.274059	-0.201242	0.104619	0.103599	0.0800697	0.909014	0.931656	0.971133	0.609708	0.702736	0.804117	0.772338	0.801994	0.842271
NZ_CP011454.1	4415811	4417757	+	CDS	GEMMAAP_RS18615	WP_145979295.1	transketolase	7.7963	0.10166	0.286756	-0.0406865	0.299759	0.328445	0.245246	0.444537	1.30097	0.431824	0.722476	0.469744	0.992231	0.26533	0.189753	0.366337	0.00604996	2.21e-08	0.00749503
NZ_CP011454.1	2358844	2360265	-	CDS	GEMMAAP_RS10030	WP_053334475.1	replication-associated recombination protein A	6.31713	0.101492	-0.0448208	0.196097	0.0397221	0.0957768	0.0665838	-1.23559	-0.517979	-1.01446	0.677213	0.941504	0.646518	0.913211	0.716134	0.828298	2.65e-09	0.000679439	7.79e-08
NZ_CP011454.1	4643956	4644885	-	CDS	GEMMAAP_RS19530	WP_026848874.1	rhomboid family intramembrane serine protease	7.93606	0.101455	-0.049087	0.0235797	0.173181	0.103251	0.142634	0.152646	-0.154997	0.069926	0.65221	0.941504	0.993197	0.458147	0.674973	0.543838	0.232966	0.251286	0.594373
NZ_CP011454.1	3309084	3310571	+	CDS	GEMMAAP_RS14040	WP_075071531.1	deoxyribodipyrimidine photo-lyase	5.62358	0.101425	-0.0213603	-0.150782	-0.0720966	0.237316	0.049981	-0.665371	-0.914826	-0.50382	0.705017	0.971468	0.798027	0.831768	0.324572	0.917047	5.51e-05	1.65e-06	0.00142409
NZ_CP011454.1	4676609	4677061	-	CDS	GEMMAAP_RS19710	WP_026848903.1	hypothetical protein	4.53111	0.101318	0.0620599	-0.0979015	0.171608	-0.305559	0.0152836	0.532261	0.4599	0.831144	0.798184	0.941504	0.990533	0.646146	0.307135	0.983819	0.00312142	0.0126365	3.65e-05
NZ_CP011454.1	1997173	1997649	+	CDS	GEMMAAP_RS08275	WP_026850587.1	hypothetical protein	8.81295	0.101122	0.0238558	0.085863	-0.20685	-0.0920766	-0.253589	0.393397	-0.182525	0.251691	0.74447	0.971721	0.934428	0.495754	0.786601	0.381775	0.0201882	0.29998	0.126977
NZ_CP011454.1	1530303	1531268	+	CDS	GEMMAAP_RS06320	WP_026850290.1	YihY/virulence factor BrkB family protein	7.42052	0.100476	-0.226071	-0.151622	0.152497	-0.163104	-0.0523699	0.0342149	-0.192362	-0.38818	0.730894	0.63755	0.798162	0.624037	0.56181	0.9002	0.835964	0.246459	0.0161227
NZ_CP011454.1	1294489	1295142	+	CDS	GEMMAAP_RS05430	WP_082821083.1	DUF4159 domain-containing protein	4.42377	0.100175	0.199354	0.350042	0.304421	0.304139	0.328156	-1.10805	-0.718585	-1.31267	0.786224	0.753071	0.51994	0.367852	0.30855	0.269564	1.51e-06	0.000546336	3.91e-07
NZ_CP011454.1	803471	803827	+	CDS	GEMMAAP_RS03425	WP_026850230.1	sulfite exporter TauE/SafE family protein	4.43614	0.100023	-0.0852026	-0.0887524	-0.200135	0.451069	-0.0775671	0.712784	0.534998	0.917818	0.7869	0.928979	0.992231	0.606509	0.104369	0.863194	0.000216743	0.00497597	1.23e-05
NZ_CP011454.1	946043	946474	-	CDS	GEMMAAP_RS03925	WP_026850159.1	hypothetical protein	4.83822	0.0999957	-0.123324	-0.357953	-0.055474	0.111033	-0.0490738	0.0604198	-0.00396306	0.100316	0.763413	0.864314	0.493622	0.902725	0.736871	0.916379	0.723624	0.985525	0.564301
NZ_CP011454.1	3655850	3656302	+	CDS	GEMMAAP_RS15460	WP_026848482.1	SUF system NifU family Fe-S cluster assembly protein	7.8607	0.0998963	-0.40423	0.246582	0.477138	-0.799402	0.406946	-2.73086	-3.29102	-3.86513	0.916727	0.791958	0.916058	0.530147	0.232867	0.608428	2.26e-06	5.59e-07	4.98e-08
NZ_CP011454.1	1425591	1426094	+	CDS	GEMMAAP_RS05890	WP_026849845.1	hypothetical protein	4.67898	0.0986769	-0.159309	-0.0511608	0.317568	0.102968	0.156037	0.543483	0.604901	0.727197	0.79215	0.837412	0.992231	0.353031	0.78126	0.666953	0.00346733	0.00206733	0.000275169
NZ_CP011454.1	384871	385278	+	CDS	GEMMAAP_RS01705	WP_043580143.1	hypothetical protein	6.41146	0.0986677	-0.53053	-0.0371141	0.093616	-0.0143798	-0.153558	-1.07209	-0.805822	-1.20016	0.776755	0.104831	0.992231	0.813544	0.987832	0.660537	1.44e-06	0.000111655	3.67e-07
NZ_CP011454.1	2755891	2757819	-	CDS	GEMMAAP_RS11740	WP_043580683.1	ankyrin repeat domain-containing protein	6.22045	0.0985512	-0.220232	0.0797139	0.0684547	-0.227856	-0.0419637	-0.748806	-0.177235	-0.95624	0.744065	0.660277	0.949402	0.86155	0.394428	0.926942	4.41e-05	0.292239	2.23e-06
NZ_CP011454.1	1782544	1783428	+	CDS	GEMMAAP_RS07400	WP_053334380.1	CPBP family intramembrane metalloprotease	6.34818	0.0985366	-0.291638	0.0337598	0.363827	0.466566	0.318459	0.240238	0.526229	0.448601	0.775979	0.538762	0.993197	0.240952	0.0849558	0.265848	0.161252	0.00456378	0.0115463
NZ_CP011454.1	4026212	4027369	+	CDS	GEMMAAP_RS16970	WP_026848255.1	ABC transporter substrate-binding protein	3.84328	0.0979882	-0.227866	-0.02527	-0.0938406	-0.294131	-0.153507	-0.188537	-0.175665	-0.014681	0.82317	0.752796	0.999712	0.934875	0.394971	0.715326	0.346608	0.416986	0.948017
NZ_CP011454.1	3651323	3652048	+	CDS	GEMMAAP_RS15440	WP_053333658.1	helix-turn-helix domain-containing protein	7.56012	0.0979774	-0.0880741	0.339153	0.706981	-0.899507	0.502062	-1.07633	-1.29258	-1.7821	0.875664	0.946893	0.718315	0.160045	0.0484412	0.305948	0.000819343	0.000209211	3.05e-06
NZ_CP011454.1	4030043	4030993	-	CDS	GEMMAAP_RS16980	WP_145979205.1	SGNH/GDSL hydrolase family protein	6.22773	0.0979026	0.203134	0.0407109	-0.354114	-0.20809	-0.202361	-0.0881363	-0.559834	-0.359027	0.711022	0.64064	0.999712	0.178724	0.390445	0.426108	0.545272	0.000573332	0.015891
NZ_CP011454.1	4171040	4171468	-	CDS	GEMMAAP_RS17575	WP_026848174.1	secondary thiamine-phosphate synthase enzyme YjbQ	4.2787	0.0978776	-0.00671038	0.0352243	-0.164372	-0.180018	-0.0463144	0.398628	0.141194	0.337699	0.818686	0.999855	0.999712	0.714122	0.638291	0.938205	0.042874	0.510604	0.0929462
NZ_CP011454.1	3629003	3630625	+	CDS	GEMMAAP_RS15335	WP_026848498.1	alpha-D-glucose phosphate-specific phosphoglucomutase	7.63752	0.0975949	-0.0359495	0.231127	0.0306342	-0.173472	-0.0499396	-0.460597	-0.215349	-0.554003	0.779679	0.965308	0.664583	0.958981	0.593894	0.918161	0.0116018	0.249911	0.00308001
NZ_CP011454.1	421382	422836	-	CDS	GEMMAAP_RS01880	WP_145978952.1	CoF synthetase	2.92698	0.0974582	-0.23768	-0.490022	0.224279	-0.224062	-0.409754	1.11699	1.32384	1.27247	0.934283	0.918236	0.850633	0.834807	0.817942	0.654546	0.00820985	0.00328141	0.00437322
NZ_CP011454.1	3841572	3843236	-	CDS	GEMMAAP_RS16250	WP_026848365.1	LuxR C-terminal-related transcriptional regulator	6.22275	0.097275	0.0466633	0.224685	0.241414	0.424484	0.141364	-0.561055	-0.266271	-0.520476	0.746601	0.947067	0.652943	0.405867	0.0850902	0.652177	0.00097015	0.107518	0.00229528
NZ_CP011454.1	458445	460349	+	CDS	GEMMAAP_RS02020	WP_145978956.1	multicopper oxidase domain-containing protein	5.15427	0.0972666	0.203978	0.0788266	0.545523	0.435742	0.56929	0.184715	0.627063	0.416852	0.786224	0.740809	0.968429	0.0889659	0.111371	0.0543497	0.285019	0.00111276	0.0203795
NZ_CP011454.1	3533854	3535170	-	CDS	GEMMAAP_RS14930	WP_026848558.1	aminopeptidase P family protein	6.61684	0.0968605	0.011824	-0.0575034	0.207401	-0.124719	0.0813214	0.214011	0.111897	-0.00140919	0.650182	0.986214	0.956137	0.348793	0.56307	0.752254	0.0753249	0.38254	0.991395
NZ_CP011454.1	1357775	1366138	-	CDS	GEMMAAP_RS05665	WP_053334215.1	hypothetical protein	5.69171	0.0968305	0.189371	0.184448	0.456896	0.179521	0.235082	0.862715	0.896212	0.823599	0.756461	0.736802	0.761392	0.113825	0.521499	0.397643	4.56e-06	5.19e-06	1.06e-05
NZ_CP011454.1	4547498	4549228	+	CDS	GEMMAAP_RS19160	WP_043581782.1	M28 family peptidase	4.1157	0.0967724	0.185231	0.0939964	-0.189095	-0.160122	0.0380842	1.11024	0.840059	1.2339	0.910812	0.773772	0.9554	0.618856	0.635779	0.964544	3.35e-07	3.77e-05	9.26e-08
NZ_CP011454.1	1221021	1221524	+	CDS	GEMMAAP_RS05075	WP_026849983.1	50S ribosomal protein L10	8.15675	0.0963898	0.0252564	-0.0427926	-0.0480663	0.17278	-0.0868812	-0.666319	-0.0750602	-1.03568	0.757276	0.970685	0.992231	0.908817	0.55358	0.812042	0.000237119	0.68126	7.25e-07
NZ_CP011454.1	4054752	4056419	-	CDS	GEMMAAP_RS17105	WP_026848239.1	energy-dependent translational throttle protein EttA	8.01608	0.0961967	-0.0734376	0.078019	-0.0638592	-0.0115706	-0.109743	-0.682569	-0.757612	-0.684029	0.759917	0.931656	0.947959	0.871223	0.991266	0.753406	0.000190275	9.3e-05	0.000186819
NZ_CP011454.1	1889147	1889317	+	CDS	GEMMAAP_RS20520	WP_158514774.1	hypothetical protein	6.54245	0.0960807	-0.0977807	-0.17234	-0.0523374	-0.26058	-0.157887	0.576504	0.336504	0.698498	0.80108	0.917341	0.833372	0.916552	0.412843	0.673714	0.00319135	0.0846433	0.000586776
NZ_CP011454.1	3356657	3357517	-	CDS	GEMMAAP_RS14245	WP_026848656.1	D-amino acid aminotransferase	6.8743	0.0959801	-0.0448615	0.0745486	0.365136	0.19695	0.238586	0.813884	0.552089	0.909235	0.70682	0.942652	0.964366	0.140966	0.397406	0.309167	1.92e-06	0.000425748	3.59e-07
NZ_CP011454.1	107895	110201	+	CDS	GEMMAAP_RS00455	WP_026848997.1	TonB-dependent receptor	5.16842	0.0957193	-0.133906	-0.0167585	0.236999	0.036549	0.0803684	0.224517	0.209412	0.405954	0.741047	0.833404	0.999712	0.396947	0.935138	0.810862	0.129956	0.181625	0.00916546
NZ_CP011454.1	811570	812439	-	CDS	GEMMAAP_RS03455	WP_053334306.1	transporter substrate-binding domain-containing protein	7.5787	0.0955528	-0.0505085	0.0544038	0.264513	0.0183936	0.136979	0.519751	0.284867	0.51548	0.790174	0.949411	0.985589	0.416966	0.981948	0.7093	0.00557762	0.131014	0.00593415
NZ_CP011454.1	2266710	2267579	-	CDS	GEMMAAP_RS09580	WP_026850738.1	acetyl-CoA carboxylase%2C carboxyltransferase subunit beta	7.78128	0.0955218	-0.00471604	-0.120385	0.0218371	-0.102366	-0.0346763	-0.688879	-0.528077	-0.640031	0.705523	0.999855	0.833372	0.959961	0.702736	0.931186	2.27e-05	0.00070739	5.64e-05
NZ_CP011454.1	1807972	1809681	+	CDS	GEMMAAP_RS07530	WP_026850471.1	dihydroxy-acid dehydratase	5.47436	0.0951921	0.0596771	0.0527393	0.0831295	-0.277735	0.000542224	0.358668	0.0278549	0.258354	0.808732	0.941504	0.987843	0.824629	0.30458	0.999579	0.025808	0.883441	0.108976
NZ_CP011454.1	3843404	3845035	-	CDS	GEMMAAP_RS16255	WP_053333621.1	prolipoprotein diacylglyceryl transferase	3.04737	0.0951123	0.0676443	0.0247107	0.360475	0.280883	0.420026	0.482426	0.265881	0.566675	0.896587	0.963031	0.999712	0.570713	0.625902	0.436958	0.102513	0.411258	0.0663602
NZ_CP011454.1	4163043	4164620	-	CDS	GEMMAAP_RS17535	WP_026848182.1	tetratricopeptide repeat protein	6.07957	0.0945841	0.12237	0.153583	0.34091	0.433013	0.218677	-0.0622287	0.0395905	-0.0305299	0.757485	0.860884	0.817477	0.221816	0.076	0.43345	0.700492	0.828011	0.857088
NZ_CP011454.1	1322619	1324550	+	CDS	GEMMAAP_RS05550	WP_158514747.1	N-acetylmuramoyl-L-alanine amidase	5.87281	0.0945112	-0.105046	0.035703	0.0162882	-0.160877	0.0052172	0.376194	0.163629	0.314558	0.718358	0.864314	0.999712	0.975613	0.518298	0.996617	0.00861702	0.268167	0.0275529
NZ_CP011454.1	4159818	4160567	-	CDS	GEMMAAP_RS17515	WP_053333551.1	LytTR family DNA-binding domain-containing protein	5.41388	0.0944677	0.120139	0.13438	0.0869136	0.00262958	0.0676237	0.940774	0.645499	1.13446	0.815302	0.893988	0.913037	0.852455	0.999236	0.889774	1.68e-05	0.00178048	1.33e-06
[truncated: 2,452 more rows]
